# Supplementary material for: Comparative Analyses by Sequencing of Transcriptomes during Skeletal Muscle Development between Pig Breeds Differing in Muscle Growth Rate and Fatness
Source: PLoS One. 2011 May 26;6(5):e19774. doi: 10.1371/journal.pone.0019774 (PMC3102668; doi:10.1371/journal.pone.0019774)
Supplement: Table S3 — STC (Series Test of Cluster) analysis of DE genes. (XLS) [file pone.0019774.s015.xls]

## Sheet: Landrace-ten development stages
#gene identifier	pig_GI	pig_Genebank	pig_Description	pig_Gene symbol	human_Genebank	human_Gene ID	human_Gene	human_Gene description	embryo36d	embryo49d	embryo63d	embryo77d	embryo91d	birth2d	birth28d	birth90d	birth120d	birth180d	Profile
gi|104295128|gb|DQ499444.1|	104295128	DQ499444.1	Sus scrofa adenylate kinase 5 (AK5) mRNA, partial cds	AK5	NM_012093.2	26289	AK5	adenylate kinase 5	0	-1.96	-1.36	-0.77	-1.11	-3.77	-9.77	-9.77	-9.77	-9.77	0
gi|108796069|ref|NM_001042375.1|	108796069	NM_001042375.1	Sus scrofa integral membrane protein 2B (ITM2B), mRNA	ITM2B	NM_021999.4	9445	ITM2B	integral membrane protein 2B	0	-0.15	0.18	0.16	0.44	-0.08	-0.24	-0.45	-0.78	-0.98	0
gi|109639161|ref|NM_001006593.2|	109639161	NM_001006593.2	Sus scrofa potassium voltage-gated channel, shaker-related subfamily, member 5 (KCNA5), mRNA	KCNA5	NM_002234.2	3741	KCNA5	potassium voltage-gated channel, shaker-related subfamily, member 5	0	1.76	0.21	0.47	1.49	-1.7	-0.64	-1.37	-2.93	-3.81	0
gi|113205555|ref|NM_001044525.1|	113205555	NM_001044525.1	Sus scrofa v-kit Hardy-Zuckerman 4 feline sarcoma viral oncogene homolog (KIT), mRNA	KIT	NM_001093772.1	3815	KIT	v-kit Hardy-Zuckerman 4 feline sarcoma viral oncogene homolog	0	-1.38	-1.09	-1.14	-2.25	-3.4	-3.84	-4.99	-3.34	-5.31	0
gi|113205597|ref|NM_001044537.1|	113205597	NM_001044537.1	Sus scrofa v-Ha-ras Harvey rat sarcoma viral oncogene homolog (HRAS), mRNA	HRAS	NM_002524.3	4893	NRAS	neuroblastoma RAS viral (v-ras) oncogene homolog	0	0.78	0.63	1.05	-0.11	-1.38	-1.73	-1.59	-3.42	-3.5	0
gi|113205611|ref|NM_001044541.1|	113205611	NM_001044541.1	Sus scrofa metaxin 2 (LOC733591), mRNA	LOC733591	NM_006554.4	10651	MTX2	metaxin 2	0	0.4	0.41	0.02	0.33	0.26	-1.11	-0.68	-0.38	-0.84	0
gi|113205623|ref|NM_001044545.1|	113205623	NM_001044545.1	Sus scrofa pleiomorphic adenoma gene-like 1 (PLAGL1), mRNA	PLAGL1	NM_001080954.1	5325	PLAGL1	pleiomorphic adenoma gene-like 1	0	1.21	1.46	1.74	1.32	-1.33	-2.82	-3.65	-6.09	-13.28	0
gi|113205689|ref|NM_001044559.1|	113205689	NM_001044559.1	Sus scrofa protein phosphatase 1 catalytic subunit alpha isoform (LOC733611), mRNA	LOC733611	NM_002708.3	5499	PPP1CA	protein phosphatase 1, catalytic subunit, alpha isoform	0	0.05	0.29	-0.19	-0.17	-0.97	-0.93	-1.24	-2.15	-1.45	0
gi|113205761|ref|NM_001044578.1|	113205761	NM_001044578.1	Sus scrofa granulin (GRN), mRNA	GRN	AK000607.1	2896	GRN	granulin	0	-0.72	-0.47	-0.49	-0.86	-1.38	-2.06	-2.65	-1.59	-2.3	0
gi|113205765|ref|NM_001044576.1|	113205765	NM_001044576.1	Sus scrofa nuclear receptor corepressor 2 (LOC733643), mRNA	LOC733643	NM_001077261.1	9612	NCOR2	nuclear receptor co-repressor 2	0	-0.28	-0.13	-0.55	-1.01	0.15	-0.3	-2.32	-1.71	-3.14	0
gi|113205849|ref|NM_001044600.1|	113205849	NM_001044600.1	Sus scrofa regulator of G-protein signaling 2, 24kDa (RGS2), mRNA	RGS2	NM_002923.3	5997	RGS2	regulator of G-protein signaling 2, 24kDa	0	-1.56	-0.98	-2.09	-2.71	-11.37	-5.26	-11.37	-5.51	-11.37	0
gi|113205897|ref|NM_001044613.1|	113205897	NM_001044613.1	Sus scrofa microtubule-associated protein, RP/EB family, member 1 (MAPRE1), mRNA	MAPRE1	NM_012325.2	22919	MAPRE1	microtubule-associated protein, RP/EB family, member 1	0	-0.22	-0.6	-0.64	-0.97	-1.2	-2.34	-2.57	-2.72	-2.62	0
gi|113205909|ref|NM_001044615.1|	113205909	NM_001044615.1	Sus scrofa mediator complex subunit 7 (MED7), mRNA	MED7	NM_004270.4	9443	MED7	mediator complex subunit 7	0	-0.95	-0.27	-0.76	-0.29	-0.6	-1.07	-0.5	-4.12	-3.45	0
gi|113374883|gb|DQ631863.1|	113374883	DQ631863.1	Sus scrofa chromosome 14 clone bR10D1, mRNA sequence		AC012168.10	80114	BICC1	bicaudal C homolog 1 (Drosophila)	0	-0.25	-0.91	-1.53	-1.5	-2.26	-3.42	-11.85	-4.4	-5.05	0
gi|114326182|ref|NM_001048072.1|	114326182	NM_001048072.1	Sus scrofa ADP-ribosylation factor family-like protein (LOC595108), mRNA	LOC595108	NM_001660.3	378	ARF4	ADP-ribosylation factor 4	0	-2.97	-2.48	-3	-2.85	-2.67	-4.15	-3.97	-6.71	-7.41	0
gi|114703735|ref|NM_001048187.1|	114703735	NM_001048187.1	Sus scrofa delta-like 1 homolog (Drosophila) (DLK1), transcript variant 1, mRNA	DLK1	AK289384.1	8788	DLK1	delta-like 1 homolog (Drosophila)	0	0.63	1.09	1.59	2.19	-0.21	-8.02	-8.02	-8.02	-8.02	0
gi|115545523|dbj|AK230638.1|	115545523	AK230638.1	Sus scrofa mRNA, clone:AMP010019E02, expressed in alveolar macrophage	LOC100157274	NM_012399.3	23760	PITPNB	phosphatidylinositol transfer protein, beta	0	1.73	1.26	1	1.29	-0.77	-1.75	-1.68	-10.02	-10.02	0
gi|115545530|dbj|AK230645.1|	115545530	AK230645.1	Sus scrofa mRNA, clone:AMP010020H09, expressed in alveolar macrophage	LIPA	NM_000235.2	3988	LIPA	lipase A, lysosomal acid, cholesterol esterase	0	-1.02	-1.02	-0.94	-0.64	-1.46	-1.6	-1.55	-1.93	-2.09	0
gi|115545534|dbj|AK230649.1|	115545534	AK230649.1	Sus scrofa mRNA, clone:AMP010021D01, expressed in alveolar macrophage		BC143912.1	170622	COMMD6	COMM domain containing 6	0	0.62	0.55	0.28	-0.04	-1.29	-1.71	-2.62	-2.23	-1.66	0
gi|115545542|dbj|AK230657.1|	115545542	AK230657.1	Sus scrofa mRNA, clone:AMP010021H01, expressed in alveolar macrophage		BC025321.1	3190	HNRNPK	heterogeneous nuclear ribonucleoprotein K	0	0.57	0.28	0.62	0.43	-0.27	-1.05	-1.11	-1.54	-1.36	0
gi|115545552|dbj|AK230667.1|	115545552	AK230667.1	Sus scrofa mRNA, clone:AMP010022F12, expressed in alveolar macrophage		AK002021.1	55781	RIOK2	RIO kinase 2 (yeast)	0	-0.53	-0.57	-0.35	-0.86	-0.47	-1.69	-1.69	-1.52	-2.14	0
gi|115545554|dbj|AK230669.1|	115545554	AK230669.1	Sus scrofa mRNA, clone:AMP010023G03, expressed in alveolar macrophage		NM_007175.6	11160	ERLIN2	ER lipid raft associated 2	0	0.45	0.54	0.31	0.21	-1.4	-1.89	-2.63	-2.6	-1.79	0
gi|115545558|dbj|AK230673.1|	115545558	AK230673.1	Sus scrofa mRNA, clone:AMP010023H02, expressed in alveolar macrophage		BC144252.1	57695	USP37	ubiquitin specific peptidase 37	0	-0.32	-0.38	-0.5	-0.4	-0.9	-1.53	-2.63	-2.66	-3.74	0
gi|115545570|dbj|AK230685.1|	115545570	AK230685.1	Sus scrofa mRNA, clone:AMP010025D05, expressed in alveolar macrophage		NM_000021.3	5663	PSEN1	presenilin 1	0	-0.89	-0.06	-0.4	-0.66	-1.4	-2.88	-1.99	-3.54	-1.74	0
gi|115545596|dbj|AK230711.1|	115545596	AK230711.1	Sus scrofa mRNA, clone:AMP010029A08, expressed in alveolar macrophage		AK297029.1	1824	DSC2	desmocollin 2	0	0.1	0.02	-0.49	1.87	-7.56	-7.56	-7.56	-7.56	-7.56	0
gi|115545597|dbj|AK230712.1|	115545597	AK230712.1	Sus scrofa mRNA, clone:AMP010029H03, expressed in alveolar macrophage		NM_003403.3	7528	YY1	YY1 transcription factor	0	-1.09	-1.21	-1.57	-1.34	-1.01	-1.24	-1.92	-2.72	-2.33	0
gi|115545598|dbj|AK230713.1|	115545598	AK230713.1	Sus scrofa mRNA, clone:AMP010030A10, expressed in alveolar macrophage		NM_004724.2	9183	ZW10	ZW10, kinetochore associated, homolog (Drosophila)	0	-2.38	-2.28	-2.26	-2.16	-1.96	-3.35	-3.24	-11.77	-11.77	0
gi|115545616|dbj|AK230731.1|	115545616	AK230731.1	Sus scrofa mRNA, clone:AMP010033D02, expressed in alveolar macrophage		BC017807.1	10559	SLC35A1	solute carrier family 35 (CMP-sialic acid transporter), member A1	0	-0.39	-0.22	-0.2	-0.62	-1.84	-1.8	-1.76	-3.03	-4.06	0
gi|115545622|dbj|AK230737.1|	115545622	AK230737.1	Sus scrofa mRNA, clone:AMP010034C08, expressed in alveolar macrophage		NM_017633.2	55603	FAM46A	family with sequence similarity 46, member A	0	-1.56	-0.85	-1.61	-0.57	-1.62	-2.14	-2.06	-12.46	-12.46	0
gi|115545642|dbj|AK230757.1|	115545642	AK230757.1	Sus scrofa mRNA, clone:AMP010037G04, expressed in alveolar macrophage		NM_182620.3	348235	SKA2	spindle and kinetochore associated complex subunit 2	0	-0.28	-0.95	-1.12	-1.82	-3.9	-4.03	-2.37	-3.04	-3.01	0
gi|115545643|dbj|AK230758.1|	115545643	AK230758.1	Sus scrofa mRNA, clone:AMP010038B02, expressed in alveolar macrophage		BC084541.1	10159	ATP6AP2	ATPase, H+ transporting, lysosomal accessory protein 2	0	-1.45	-1.26	-1.74	-2.02	-1.46	-2.21	-2.49	-3.19	-4.26	0
gi|115545666|dbj|AK230781.1|	115545666	AK230781.1	Sus scrofa mRNA, clone:AMP010041F02, expressed in alveolar macrophage		AK293085.1	285282	RABL3	RAB, member of RAS oncogene family-like 3	0	0.06	0.36	-0.21	-0.15	-0.86	-1.23	-1.7	-1.53	-2.08	0
gi|115545690|dbj|AK230805.1|	115545690	AK230805.1	Sus scrofa mRNA, clone:AMP010046F01, expressed in alveolar macrophage		NM_032924.3	7551	ZNF3	zinc finger protein 3	0	-0.65	-0.17	-0.54	-0.96	-1.27	-2.27	-2.64	-2.5	-1.34	0
gi|115545720|dbj|AK234153.1|	115545720	AK234153.1	Sus scrofa mRNA, clone:OVR010013C03, expressed in ovary		NM_001145445.1	57466	SFRS15	splicing factor, arginine/serine-rich 15	0	-0.45	-0.19	-0.56	-1.11	-1.38	-1.58	-3.31	-2.66	-9.85	0
gi|115545724|dbj|AK234157.1|	115545724	AK234157.1	Sus scrofa mRNA, clone:OVR010013H09, expressed in ovary		NM_017822.3	54934	C12orf41	chromosome 12 open reading frame 41	0	0.67	0.25	0.16	-0.44	-0.85	-0.52	-0.65	-2.04	-1.46	0
gi|115545733|dbj|AK234166.1|	115545733	AK234166.1	Sus scrofa mRNA, clone:OVR010015F05, expressed in ovary		BC024022.1	5984	RFC4	replication factor C (activator 1) 4, 37kDa	0	-0.64	-1.03	-1.48	-1.31	-2.05	-1.27	-2.84	-3.77	-4.85	0
gi|115545741|dbj|AK234174.1|	115545741	AK234174.1	Sus scrofa mRNA, clone:OVR010018G10, expressed in ovary		NM_032125.2	84065	TMEM222	transmembrane protein 222	0	-0.26	-0.36	-0.17	-0.34	-0.67	-1.02	-1.5	-2.52	-1.6	0
gi|115545773|dbj|AK234206.1|	115545773	AK234206.1	Sus scrofa mRNA, clone:OVR010027F12, expressed in ovary		AF151889.1	22921	MSRB2	methionine sulfoxide reductase B2	0	-0.34	-0.41	-1.41	-0.9	-1.69	-2.95	-3.01	-3	-4.07	0
gi|115545783|dbj|AK234216.1|	115545783	AK234216.1	Sus scrofa mRNA, clone:OVR010028E12, expressed in ovary						0	-3.11	-2.19	-1.57	-1.65	0.99	-9.92	-3.38	-9.92	-9.92	0
gi|115545784|dbj|AK234217.1|	115545784	AK234217.1	Sus scrofa mRNA, clone:OVR010028F04, expressed in ovary		AK299799.1	23042	PDXDC1	pyridoxal-dependent decarboxylase domain containing 1	0	-1.08	-1.15	-1.32	-2.33	-2.02	-3.18	-2.75	-10.61	-10.61	0
gi|115545785|dbj|AK234218.1|	115545785	AK234218.1	Sus scrofa mRNA, clone:OVR010028H07, expressed in ovary		BC014620.2	9784	SNX17	sorting nexin 17	0	-1.27	-1.14	-1.71	-1.09	-1.47	-2.05	-2.82	-11.68	-11.68	0
gi|115545790|dbj|AK234223.1|	115545790	AK234223.1	Sus scrofa mRNA, clone:OVR010029G12, expressed in ovary		AC136601.2	359750	MRPL50P3	mitochondrial ribosomal protein L50 pseudogene 3	0	-2.2	-3.74	-3.39	-4.59	-10.15	-2.72	-10.15	-10.15	-10.15	0
gi|115545810|dbj|AK234243.1|	115545810	AK234243.1	Sus scrofa mRNA, clone:OVR010032F02, expressed in ovary		NM_001011699.1	93323	HAUS8	HAUS augmin-like complex, subunit 8	0	0.11	0.01	-0.26	-0.54	-1.94	-2.33	-4.21	-1.24	-1.32	0
gi|115545812|dbj|AK234245.1|	115545812	AK234245.1	Sus scrofa mRNA, clone:OVR010032F09, expressed in ovary		NM_199342.3	374969	CCDC23	coiled-coil domain containing 23	0	1.05	0.77	0.16	0.03	-1.63	-1.27	-2.32	-1.47	-1.93	0
gi|115545819|dbj|AK234252.1|	115545819	AK234252.1	Sus scrofa mRNA, clone:OVR010033E04, expressed in ovary		NM_017637.5	54796	BNC2	basonuclin 2	0	-0.58	-2.66	-9.65	-1.38	-2.33	-9.65	-9.65	-9.65	-9.65	0
gi|115545827|dbj|AK234260.1|	115545827	AK234260.1	Sus scrofa mRNA, clone:OVR010034E07, expressed in ovary		NM_005804.2	10212	DDX39	DEAD (Asp-Glu-Ala-Asp) box polypeptide 39	0	-1.77	-1.09	-1.43	-1.94	-2.04	-3.44	-2.66	-3.46	-3.76	0
gi|115545833|dbj|AK234266.1|	115545833	AK234266.1	Sus scrofa mRNA, clone:OVR010035B04, expressed in ovary		AK291008.1	163859	C1orf55	chromosome 1 open reading frame 55	0	0.95	0.56	-0.17	-0.06	-0.47	-0.49	-2.93	-2.38	-1.27	0
gi|115545835|dbj|AK234268.1|	115545835	AK234268.1	Sus scrofa mRNA, clone:OVR010035C01, expressed in ovary		AK092299.1	79874	RABEP2	rabaptin, RAB GTPase binding effector protein 2	0	0.25	0.22	0.26	0.28	-0.49	-1.01	-2.9	-2.16	-3.65	0
gi|115545859|dbj|AK234292.1|	115545859	AK234292.1	Sus scrofa mRNA, clone:OVR010040B07, expressed in ovary		NM_021939.3	60681	FKBP10	FK506 binding protein 10, 65 kDa	0	-0.38	-0.33	-0.87	-1.36	-3.96	-5.38	-6.94	-6.29	-5.52	0
gi|115545865|dbj|AK234298.1|	115545865	AK234298.1	Sus scrofa mRNA, clone:OVR010041A03, expressed in ovary	LOC100155607	NM_002380.3	4147	MATN2	matrilin 2	0	-1.76	-1.21	-1.2	-1.68	-3.42	-9.42	-9.42	-9.42	-9.42	0
gi|115545868|dbj|AK234301.1|	115545868	AK234301.1	Sus scrofa mRNA, clone:OVR010041B05, expressed in ovary		DQ896167.2	113000	RPUSD1	RNA pseudouridylate synthase domain containing 1	0	-0.76	-0.7	-0.93	-1.06	-1.55	-2.96	-3.53	-3.37	-4.51	0
gi|115545900|dbj|AK234333.1|	115545900	AK234333.1	Sus scrofa mRNA, clone:OVR010044E01, expressed in ovary		BC141833.1	1265	CNN2	calponin 2	0	-1.11	-1.15	-1.27	-1.43	-3.38	-4.2	-4.03	-5.28	-7.69	0
gi|115545908|dbj|AK234341.1|	115545908	AK234341.1	Sus scrofa mRNA, clone:OVR010045B04, expressed in ovary		NM_022003.2	53826	FXYD6	FXYD domain containing ion transport regulator 6	0	-0.11	-0.16	-0.56	-0.89	-2.08	-2.11	-2.65	-3.2	-2.8	0
gi|115545914|dbj|AK234347.1|	115545914	AK234347.1	Sus scrofa mRNA, clone:OVR010045F12, expressed in ovary		NM_015407.4	25864	ABHD14A	abhydrolase domain containing 14A	0	-0.55	-0.53	-0.7	-1.19	-1.38	-1.66	-2.5	-2.4	-1.67	0
gi|115545916|dbj|AK234349.1|	115545916	AK234349.1	Sus scrofa mRNA, clone:OVR010045H10, expressed in ovary		NM_152450.2	145773	FAM81A	family with sequence similarity 81, member A	0	0.05	0.34	-0.25	0.03	-1.78	-3.68	-10.37	-10.37	-4.59	0
gi|115545921|dbj|AK237362.1|	115545921	AK237362.1	Sus scrofa mRNA, clone:SPL010028D05, expressed in spleen		BC004995.1	83742	MARVELD1	MARVEL domain containing 1	0	-0.7	-0.82	-1.11	-1.36	-2.83	-3.31	-4.59	-2.36	-4.4	0
gi|115545925|dbj|AK237366.1|	115545925	AK237366.1	Sus scrofa mRNA, clone:SPL010028G12, expressed in spleen		AK222732.1	9896	FIG4	FIG4 homolog, SAC1 lipid phosphatase domain containing (S. cerevisiae)	0	-0.74	-0.51	-0.96	-0.49	-1.81	-1.15	-2.35	-4.02	-5.42	0
gi|115545930|dbj|AK237371.1|	115545930	AK237371.1	Sus scrofa mRNA, clone:SPL010030A11, expressed in spleen		NM_000943.4	5480	PPIC	peptidylprolyl isomerase C (cyclophilin C)	0	-0.89	-1.15	-1.53	-1.69	-2.87	-3.6	-3.01	-4.01	-4.62	0
gi|115545971|dbj|AK237412.1|	115545971	AK237412.1	Sus scrofa mRNA, clone:SPL010037H07, expressed in spleen		BC075813.1	51363	CHST15	carbohydrate (N-acetylgalactosamine 4-sulfate 6-O) sulfotransferase 15	0	-1.36	-0.09	-0.37	-0.1	-3.06	-3.22	-4.11	-4.21	-10.65	0
gi|115545975|dbj|AK237416.1|	115545975	AK237416.1	Sus scrofa mRNA, clone:SPL010038C09, expressed in spleen		NG_008844.1	2274	FHL2	four and a half LIM domains 2	0	-0.43	-0.22	-0.41	-0.41	-2.8	-5.07	-4.64	-4.57	-5.96	0
gi|115545981|dbj|AK237422.1|	115545981	AK237422.1	Sus scrofa mRNA, clone:SPL010042B12, expressed in spleen		AK296131.1	51593	SRRT	serrate RNA effector molecule homolog (Arabidopsis)	0	-2.29	-2.36	-2.69	-1.03	-1.96	-3.66	-3.23	-9.77	-9.77	0
gi|115545987|dbj|AK237428.1|	115545987	AK237428.1	Sus scrofa mRNA, clone:SPL010043C08, expressed in spleen						0	-0.61	-0.31	-0.26	-0.53	-1.74	-0.35	-0.75	-3.28	-3.12	0
gi|115546030|dbj|AK237472.1|	115546030	AK237472.1	Sus scrofa mRNA, clone:SPL010050A10, expressed in spleen		AK315348.1	5883	RAD9A	RAD9 homolog A (S. pombe)	0	0.4	0.02	0.13	0.07	-1.97	-1.04	-1.29	-0.7	-2.04	0
gi|115546062|dbj|AK237504.1|	115546062	AK237504.1	Sus scrofa mRNA, clone:SPL010054C11, expressed in spleen	LOC100157339	NM_006479.4	10635	RAD51AP1	RAD51 associated protein 1	0	-0.83	-0.63	-0.8	-1.6	-3.98	-10.56	-10.56	-4.7	-4.78	0
gi|115546065|dbj|AK237507.1|	115546065	AK237507.1	Sus scrofa mRNA, clone:SPL010054F03, expressed in spleen						0	-0.05	-0.38	-0.29	-0.65	-2.17	-1.61	-2.64	-3.31	-10.18	0
gi|115546071|dbj|AK237513.1|	115546071	AK237513.1	Sus scrofa mRNA, clone:SPL010055E08, expressed in spleen		AK316285.1	5351	PLOD1	procollagen-lysine 1, 2-oxoglutarate 5-dioxygenase 1	0	0.21	-0.13	-0.41	-0.2	-2.25	-3.53	-3.54	-3.03	-3.36	0
gi|115546083|dbj|AK237525.1|	115546083	AK237525.1	Sus scrofa mRNA, clone:SPL010057B03, expressed in spleen		AC018648.5	441212	RP9P	retinitis pigmentosa 9 pseudogene	0	-1.18	-1.15	-1.96	-1.76	-2.92	-3.29	-3.93	-12.79	-12.79	0
gi|115546115|dbj|AK240357.1|	115546115	AK240357.1	Sus scrofa mRNA, clone:UTR010058G08, expressed in uterus		NM_001040098.1	64598	MOSPD3	motile sperm domain containing 3	0	0.48	0.74	0.5	0.04	-1.6	-1.39	-1.07	-1.25	-0.85	0
gi|115546117|dbj|AK240359.1|	115546117	AK240359.1	Sus scrofa mRNA, clone:UTR010058H11, expressed in uterus		AK297040.1	79142	PHF23	PHD finger protein 23	0	-0.38	-0.19	-0.06	-0.19	-1.74	-1.54	-1.68	-3.05	-2.32	0
gi|115546138|dbj|AK240376.1|	115546138	AK240376.1	Sus scrofa mRNA, clone:UTR010060F08, expressed in uterus		AL138976.5	326288	RPL17P4	ribosomal protein L17 pseudogene 4	0	-1.65	-0.4	-0.09	0.08	-0.23	-2.29	-3.87	-6.53	-8.94	0
gi|115546159|dbj|AK240397.1|	115546159	AK240397.1	Sus scrofa mRNA, clone:UTR010063B02, expressed in uterus		NG_007616.1	644739	WASF4	WAS protein family, member 4	0	1.21	0.99	0.98	0.64	-1.65	-2.43	-3	-2.67	-2.33	0
gi|115546178|dbj|AK240416.1|	115546178	AK240416.1	Sus scrofa mRNA, clone:UTR010066D10, expressed in uterus		BC010648.1	55290	BRF2	BRF2, subunit of RNA polymerase III transcription initiation factor, BRF1-like	0	0.59	1.39	1.86	1.01	-1.14	-8.14	-8.14	-8.14	-8.14	0
gi|115546201|dbj|AK240439.1|	115546201	AK240439.1	Sus scrofa mRNA, clone:UTR010070B04, expressed in uterus		NM_001281.2	1155	TBCB	tubulin folding cofactor B	0	0.2	0.16	0.3	0.11	-1.15	-1.38	-0.55	-2.97	-3.37	0
gi|115546222|dbj|AK240460.1|	115546222	AK240460.1	Sus scrofa mRNA, clone:UTR010075F08, expressed in uterus		NM_012336.3	26502	NARF	nuclear prelamin A recognition factor	0	-0.04	0.61	0.34	-0.35	-1.71	-1.81	-1.91	-1.29	-2.24	0
gi|115546231|dbj|AK240469.1|	115546231	AK240469.1	Sus scrofa mRNA, clone:UTR010076H11, expressed in uterus		AK304267.1	1495	CTNNA1	catenin (cadherin-associated protein), alpha 1, 102kDa	0	-0.31	0.16	0.29	0.21	-0.86	-0.88	-2.1	-10.44	-10.44	0
gi|115546234|dbj|AK240472.1|	115546234	AK240472.1	Sus scrofa mRNA, clone:UTR010079C12, expressed in uterus		AK295248.1	85013	TMEM128	transmembrane protein 128	0	-0.23	-0.16	-0.31	-0.56	-1.01	-2.86	-2.78	-2.05	-1.77	0
gi|115546287|dbj|AK240525.1|	115546287	AK240525.1	Sus scrofa mRNA, clone:UTR010089E04, expressed in uterus		NM_025076.3	80146	UXS1	UDP-glucuronate decarboxylase 1	0	0	0.33	-0.06	0.28	-0.32	-0.33	-0.29	-1.02	-1.57	0
gi|115546313|dbj|AK240551.1|	115546313	AK240551.1	Sus scrofa mRNA, clone:UTR010098A01, expressed in uterus		BC002726.2	1611	DAP	death-associated protein	0	0.32	-0.4	-1.62	-0.7	-3.32	-3.38	-4.3	-4.62	-1.91	0
gi|115546315|dbj|AK240553.1|	115546315	AK240553.1	Sus scrofa mRNA, clone:UTR010098A04, expressed in uterus		BC001766.1	6285	S100B	S100 calcium binding protein B	0	-1.52	-1.15	-0.89	-1.03	-2.4	-1.59	-2.1	-2.43	-3.67	0
gi|115546337|dbj|AK230856.1|	115546337	AK230856.1	Sus scrofa mRNA, clone:AMP010054B10, expressed in alveolar macrophage		NM_014674.2	9695	EDEM1	ER degradation enhancer, mannosidase alpha-like 1	0	0.73	0.82	0.81	1.44	-0.13	-0.69	-1	-5.26	-5.33	0
gi|115546341|dbj|AK230860.1|	115546341	AK230860.1	Sus scrofa mRNA, clone:AMP010056A02, expressed in alveolar macrophage		NM_024334.2	79188	TMEM43	transmembrane protein 43	0	1.02	1.27	1.41	1.13	-0.85	-1.91	-1.9	-2.58	-2.23	0
gi|115546348|dbj|AK230867.1|	115546348	AK230867.1	Sus scrofa mRNA, clone:AMP010057C10, expressed in alveolar macrophage		BC157835.1	54826	GIN1	gypsy retrotransposon integrase 1	0	-0.77	-0.08	-0.89	-0.47	-0.65	-1.34	-3.04	-2.34	-3.31	0
gi|115546354|dbj|AK230873.1|	115546354	AK230873.1	Sus scrofa mRNA, clone:AMP010057H06, expressed in alveolar macrophage		NM_003101.4	6646	SOAT1	sterol O-acyltransferase 1	0	-1.05	-0.67	-1.46	-1.22	-3.57	-4.63	-11.74	-4.87	-5.96	0
gi|115546367|dbj|AK230886.1|	115546367	AK230886.1	Sus scrofa mRNA, clone:AMP010059F01, expressed in alveolar macrophage		NG_011988.1	2824	GPM6B	glycoprotein M6B	0	-1.66	-2.57	-2.58	-2.26	-3.56	-10.15	-10.15	-10.15	-10.15	0
gi|115546374|dbj|AK230893.1|	115546374	AK230893.1	Sus scrofa mRNA, clone:AMP010060B12, expressed in alveolar macrophage		NM_015509.3	25977	NECAP1	NECAP endocytosis associated 1	0	-0.52	-0.25	-0.04	-0.39	-1.01	-1.23	-2.54	-2.62	-2.55	0
gi|115546397|dbj|AK230916.1|	115546397	AK230916.1	Sus scrofa mRNA, clone:AMP010064A01, expressed in alveolar macrophage		NM_006232.2	5437	POLR2H	polymerase (RNA) II (DNA directed) polypeptide H	0	-0.6	-1.41	-2.65	-1.46	-1.73	-9.73	-9.73	-9.73	-3.36	0
gi|115546413|dbj|AK230932.1|	115546413	AK230932.1	Sus scrofa mRNA, clone:AMP010066C10, expressed in alveolar macrophage		BC020955.1	55773	TBC1D23	TBC1 domain family, member 23	0	-4	-3.82	-4.05	-10.81	-4.81	-4.12	-10.81	-10.81	-10.81	0
gi|115546435|dbj|AK230954.1|	115546435	AK230954.1	Sus scrofa mRNA, clone:AMP010068E03, expressed in alveolar macrophage		NR_004862.1	129450	C2orf60	chromosome 2 open reading frame 60	0	0.37	-0.15	-0.76	-1.13	-0.7	-1.5	-2.49	-2.42	-1.23	0
gi|115546439|dbj|AK230958.1|	115546439	AK230958.1	Sus scrofa mRNA, clone:AMP010069B10, expressed in alveolar macrophage		NM_017439.3	54103	PION	pigeon homolog (Drosophila)	0	-0.63	-0.7	0.12	-0.2	-1	-1.38	-2.69	-1.62	-3.44	0
gi|115546446|dbj|AK230965.1|	115546446	AK230965.1	Sus scrofa mRNA, clone:AMP010069H08, expressed in alveolar macrophage	LOC100152338	AK292836.1	64844	7-Mar	membrane-associated ring finger (C3HC4) 7	0	-0.09	0.01	-0.3	-0.15	-1.19	-1.7	-1.73	-1.44	-1.34	0
gi|115546450|dbj|AK230969.1|	115546450	AK230969.1	Sus scrofa mRNA, clone:AMP010070F06, expressed in alveolar macrophage		NM_004834.3	9448	MAP4K4	mitogen-activated protein kinase kinase kinase kinase 4	0	-0.27	-0.38	-0.36	-0.77	-1.94	-2.2	-2.54	-4.38	-3.58	0
gi|115546452|dbj|AK230971.1|	115546452	AK230971.1	Sus scrofa mRNA, clone:AMP010070F09, expressed in alveolar macrophage		NM_018834.4	9782	MATR3	matrin 3	0	-0.76	-1.12	-1.44	-0.44	-0.63	-0.55	-2.41	-11.85	-11.85	0
gi|115546459|dbj|AK230978.1|	115546459	AK230978.1	Sus scrofa mRNA, clone:AMP010074B05, expressed in alveolar macrophage		AF044215.1	4848	CNOT2	CCR4-NOT transcription complex, subunit 2	0	-0.84	-0.36	-0.23	-0.24	-0.96	-2.6	-2.37	-3.16	-3.65	0
gi|115546465|dbj|AK230984.1|	115546465	AK230984.1	Sus scrofa mRNA, clone:AMP010075C06, expressed in alveolar macrophage	SEC62	NM_003262.3	7095	SEC62	SEC62 homolog (S. cerevisiae)	0	0.34	0.18	0.58	0.79	-0.91	-0.55	-0.17	-2.39	-2.35	0
gi|115546472|dbj|AK230991.1|	115546472	AK230991.1	Sus scrofa mRNA, clone:AMP010077D03, expressed in alveolar macrophage		NM_005638.4	6845	VAMP7	vesicle-associated membrane protein 7	0	-0.96	-0.45	-0.38	-0.5	-0.61	-0.82	-1.06	-1.88	-2.22	0
gi|115546473|dbj|AK230992.1|	115546473	AK230992.1	Sus scrofa mRNA, clone:AMP010077E07, expressed in alveolar macrophage		NM_022495.5	64430	C14orf135	chromosome 14 open reading frame 135	0	-0.78	-0.56	-0.76	-0.9	-2.48	-2.57	-2.53	-2.45	-2.76	0
gi|115546477|dbj|AK230996.1|	115546477	AK230996.1	Sus scrofa mRNA, clone:AMP010078C12, expressed in alveolar macrophage	LOC100157840	NM_016106.2	23256	SCFD1	sec1 family domain containing 1	0	-0.32	-0.18	-0.18	-0.13	-1.22	-2.48	-1.66	-1.33	-2.06	0
gi|115546484|dbj|AK231003.1|	115546484	AK231003.1	Sus scrofa mRNA, clone:AMP010079D10, expressed in alveolar macrophage		NM_005966.3	4664	NAB1	NGFI-A binding protein 1 (EGR1 binding protein 1)	0	-0.36	-0.87	-1.06	-0.31	-1.81	-1.67	-2.15	-3.32	-3.28	0
gi|115546492|dbj|AK231011.1|	115546492	AK231011.1	Sus scrofa mRNA, clone:AMP010081D07, expressed in alveolar macrophage		NM_018206.4	55737	VPS35	vacuolar protein sorting 35 homolog (S. cerevisiae)	0	-0.23	-0.19	-0.62	-0.43	-1.09	-1.25	-1.71	-1.7	-1.82	0
gi|115546495|dbj|AK231014.1|	115546495	AK231014.1	Sus scrofa mRNA, clone:AMP010082B06, expressed in alveolar macrophage		AK292215.1	28970	C11orf54	chromosome 11 open reading frame 54	0	-0.76	-0.9	-1.99	-1.33	-1.42	-3.42	-2.63	-5.47	-4.54	0
gi|115546499|dbj|AK231018.1|	115546499	AK231018.1	Sus scrofa mRNA, clone:AMP010081H09, expressed in alveolar macrophage		AK291784.1	9844	ELMO1	engulfment and cell motility 1	0	-1.77	-1.96	-1.61	-1.8	-2.95	-2.85	-9.95	-9.95	-9.95	0
gi|115546505|dbj|AK231024.1|	115546505	AK231024.1	Sus scrofa mRNA, clone:AMP010082E08, expressed in alveolar macrophage		NM_015123.1	23150	FRMD4B	FERM domain containing 4B	0	-0.02	0.2	0.3	0.87	-2.03	-1.37	-2.34	-1.32	-1.61	0
gi|115546529|dbj|AK234367.1|	115546529	AK234367.1	Sus scrofa mRNA, clone:OVR010048F09, expressed in ovary		AK290488.1	5764	PTN	pleiotrophin	0	0.11	-0.63	-2.28	-2.97	-6.29	-4.97	-6.76	-7.44	-13.88	0
gi|115546590|dbj|AK234428.1|	115546590	AK234428.1	Sus scrofa mRNA, clone:OVR010060D08, expressed in ovary		NM_025082.3	80152	CENPT	centromere protein T	0	0.62	-0.23	-0.93	-1.88	-3.77	-9.77	-9.77	-3.33	-9.77	0
gi|115546596|dbj|AK234434.1|	115546596	AK234434.1	Sus scrofa mRNA, clone:OVR010061C10, expressed in ovary		NM_001143778.1	55616	ASAP3	ArfGAP with SH3 domain, ankyrin repeat and PH domain 3	0	-0.43	0.11	0.1	-0.6	-3.73	-3.87	-4.9	-4.24	-4.84	0
gi|115546609|dbj|AK234447.1|	115546609	AK234447.1	Sus scrofa mRNA, clone:OVR010063B05, expressed in ovary		NM_015360.4	23517	SKIV2L2	superkiller viralicidic activity 2-like 2 (S. cerevisiae)	0	0.27	-0.15	-0.34	-0.26	-0.91	-0.62	-1.1	-1.63	-2	0
gi|115546623|dbj|AK234461.1|	115546623	AK234461.1	Sus scrofa mRNA, clone:OVR010067A09, expressed in ovary		NM_006107.3	51747	LUC7L3	LUC7-like 3 (S. cerevisiae)	0	0.31	0.16	0.07	0.47	-1.17	-1.22	-1.41	-2.9	-2.79	0
gi|115546629|dbj|AK234467.1|	115546629	AK234467.1	Sus scrofa mRNA, clone:OVR010067F11, expressed in ovary		NM_004395.3	1627	DBN1	drebrin 1	0	0.26	-0.39	-0.14	-0.53	-4.22	-11.54	-11.54	-5.68	-11.54	0
gi|115546657|dbj|AK234495.1|	115546657	AK234495.1	Sus scrofa mRNA, clone:OVR010072H11, expressed in ovary		NM_014646.2	9663	LPIN2	lipin 2	0	-0.7	-0.83	-1.36	-1.45	-3.12	-4.5	-4.81	-5.49	-6.15	0
gi|115546664|dbj|AK234502.1|	115546664	AK234502.1	Sus scrofa mRNA, clone:OVR010073F04, expressed in ovary		AK025509.1	9989	PPP4R1	protein phosphatase 4, regulatory subunit 1	0	-0.56	-0.56	-0.95	-0.68	-1.85	-2.03	-3.52	-3.06	-2.59	0
gi|115546677|dbj|AK234515.1|	115546677	AK234515.1	Sus scrofa mRNA, clone:OVR010075B09, expressed in ovary		NM_006825.3	10970	CKAP4	cytoskeleton-associated protein 4	0	0.36	0.19	-0.31	-0.64	-2.72	-3.69	-4.77	-4.16	-4.42	0
gi|115546696|dbj|AK234534.1|	115546696	AK234534.1	Sus scrofa mRNA, clone:OVR010077B11, expressed in ovary		NM_004078.2	1465	CSRP1	cysteine and glycine-rich protein 1	0	-1.58	-1.36	-1.3	-1.56	-1.07	-2.47	-2.69	-2.21	-2.79	0
gi|115546736|dbj|AK237582.1|	115546736	AK237582.1	Sus scrofa mRNA, clone:SPL010064G07, expressed in spleen		AF086914.1	58477	SRPRB	signal recognition particle receptor, B subunit	0	-1.9	-2.2	-2.85	-2.96	-1.38	-3.51	-3.25	-2.92	-3.53	0
gi|115546786|dbj|AK237632.1|	115546786	AK237632.1	Sus scrofa mRNA, clone:SPL010071F07, expressed in spleen		BC050365.1	83483	PLVAP	plasmalemma vesicle associated protein	0	-0.34	-0.94	-0.83	-0.34	-0.81	-2.3	-3.86	-4.27	-2.41	0
gi|115546792|dbj|AK237638.1|	115546792	AK237638.1	Sus scrofa mRNA, clone:SPL010072A06, expressed in spleen		BC008966.2	55111	PLEKHJ1	pleckstrin homology domain containing, family J member 1	0	-0.27	0.04	0.22	0.27	-0.82	-1.43	-2.22	-1.15	-2.06	0
gi|115546829|dbj|AK237675.1|	115546829	AK237675.1	Sus scrofa mRNA, clone:SPL010078A09, expressed in spleen		AK000553.1	54974	THG1L	tRNA-histidine guanylyltransferase 1-like (S. cerevisiae)	0	-0.55	-0.49	-0.84	-0.77	-1.23	-2.18	-1.99	-3.8	-5.21	0
gi|115546833|dbj|AK237679.1|	115546833	AK237679.1	Sus scrofa mRNA, clone:SPL010078D02, expressed in spleen						0	0.78	0.66	0.18	0.76	-0.05	0.34	-0.67	-1.79	-2.33	0
gi|115546838|dbj|AK237684.1|	115546838	AK237684.1	Sus scrofa mRNA, clone:SPL010080A12, expressed in spleen		AK001887.1	51422	PRKAG2	protein kinase, AMP-activated, gamma 2 non-catalytic subunit	0	0.09	0.14	0.41	1.04	-0.7	-1.54	-3.08	-4.01	-3.82	0
gi|115546853|dbj|AK237699.1|	115546853	AK237699.1	Sus scrofa mRNA, clone:SPL010082C10, expressed in spleen		AK056427.1	84243	ZDHHC18	zinc finger, DHHC-type containing 18	0	-0.12	0.22	-0.27	-0.33	-1.27	-0.93	-3.61	-2.28	-2.62	0
gi|115546858|dbj|AK237704.1|	115546858	AK237704.1	Sus scrofa mRNA, clone:SPL010082H12, expressed in spleen		NM_003442.5	7702	ZNF143	zinc finger protein 143	0	-0.46	-0.75	-1.42	-0.77	-1.74	-0.8	-1.16	-1.88	-1.29	0
gi|115546860|dbj|AK237706.1|	115546860	AK237706.1	Sus scrofa mRNA, clone:SPL010083C06, expressed in spleen		NM_017762.2	54893	MTMR10	myotubularin related protein 10	0	-0.35	0.15	-0.6	-0.63	-1.3	-1.46	-1.03	-1.4	-2.77	0
gi|115546864|dbj|AK237710.1|	115546864	AK237710.1	Sus scrofa mRNA, clone:SPL010083G03, expressed in spleen		NM_002898.3	5939	RBMS2	RNA binding motif, single stranded interacting protein 2	0	0.08	-0.26	-0.64	-0.47	-2.67	-2.88	-2.13	-2.12	-2.4	0
gi|115546869|dbj|AK237715.1|	115546869	AK237715.1	Sus scrofa mRNA, clone:SPL010084C08, expressed in spleen		AK299996.1	6452	SH3BP2	SH3-domain binding protein 2	0	0.27	0.24	0.01	-0.76	-3.33	-2.81	-2.8	-4.06	-3.54	0
gi|115546889|dbj|AK237735.1|	115546889	AK237735.1	Sus scrofa mRNA, clone:SPL010086G07, expressed in spleen		NM_002037.3	2534	FYN	FYN oncogene related to SRC, FGR, YES	0	-3.31	-2.29	-2.68	-5.05	-10.61	-10.61	-10.61	-10.61	-10.61	0
gi|115546950|dbj|AK240596.1|	115546950	AK240596.1	Sus scrofa mRNA, clone:UTR010104C12, expressed in uterus		AK302976.1	7084	TK2	thymidine kinase 2, mitochondrial	0	-2.12	-2.03	-3.85	-3.46	-1.02	-1.69	-9.61	-3.75	-9.61	0
gi|115546953|dbj|AK240599.1|	115546953	AK240599.1	Sus scrofa mRNA, clone:UTR010104E02, expressed in uterus		BC114564.1	29960	FTSJ2	FtsJ homolog 2 (E. coli)	0	-1.02	-0.49	-0.15	-0.85	-1.02	-2.66	-2.59	-2.9	-2.69	0
gi|115546964|dbj|AK240610.1|	115546964	AK240610.1	Sus scrofa mRNA, clone:UTR010106F11, expressed in uterus		BC172518.1	7855	FZD5	frizzled homolog 5 (Drosophila)	0	-1.41	-1.45	-2.15	-2.34	-4.09	-4.84	-12.27	-12.27	-12.27	0
gi|115547032|dbj|AK231087.1|	115547032	AK231087.1	Sus scrofa mRNA, clone:AMP010091E05, expressed in alveolar macrophage	LOC100157437	NM_005613.5	5999	RGS4	regulator of G-protein signaling 4	0	-3.36	-1.85	-3.51	-1.96	-3.85	-9.85	-9.85	-9.85	-9.85	0
gi|115547033|dbj|AK231088.1|	115547033	AK231088.1	Sus scrofa mRNA, clone:AMP010091E09, expressed in alveolar macrophage		NM_015938.3	51068	NMD3	NMD3 homolog (S. cerevisiae)	0	-0.38	-0.12	-0.38	-0.27	0.24	-0.71	-1.07	-0.87	-1.85	0
gi|115547035|dbj|AK231090.1|	115547035	AK231090.1	Sus scrofa mRNA, clone:AMP010091G08, expressed in alveolar macrophage		AF255625.1	81929	SEH1L	SEH1-like (S. cerevisiae)	0	0.42	-0.15	-0.1	-0.34	-0.76	-0.06	-1.44	-2.2	-3.6	0
gi|115547041|dbj|AK231096.1|	115547041	AK231096.1	Sus scrofa mRNA, clone:AMP010092H08, expressed in alveolar macrophage		NM_080792.2	140885	SIRPA	signal-regulatory protein alpha	0	-0.87	-0.5	0	-0.34	-2.89	-2.46	-5.03	-6.29	-3.9	0
gi|115547058|dbj|AK231113.1|	115547058	AK231113.1	Sus scrofa mRNA, clone:AMP010095D12, expressed in alveolar macrophage		NM_001130142.1	4013	VWA5A	von Willebrand factor A domain containing 5A	0	-1.58	-0.09	-1.14	-3.27	-2.84	-4.54	-4.11	-4.79	-4.27	0
gi|115547063|dbj|AK231118.1|	115547063	AK231118.1	Sus scrofa mRNA, clone:AMP010096B04, expressed in alveolar macrophage		NM_012333.3	26292	MYCBP	c-myc binding protein	0	0.42	0.09	-0.16	0.36	-0.56	-2.45	-3.02	-1.89	-2.45	0
gi|115547094|dbj|AK231149.1|	115547094	AK231149.1	Sus scrofa mRNA, clone:AMP010101C08, expressed in alveolar macrophage		AK289665.1	120526	DNAJC24	DnaJ (Hsp40) homolog, subfamily C, member 24	0	-1.26	-0.97	-0.9	-1.26	-0.52	-2.42	-1.99	-3.72	-4.38	0
gi|115547099|dbj|AK231154.1|	115547099	AK231154.1	Sus scrofa mRNA, clone:ITT010001B09, expressed in intestine		BC062585.1	79169	C1orf35	chromosome 1 open reading frame 35	0	-0.18	0.06	-0.09	-1.46	-1.15	-0.96	-1.26	-1.07	-1.81	0
gi|115547111|dbj|AK231166.1|	115547111	AK231166.1	Sus scrofa mRNA, clone:ITT010005B09, expressed in intestine		AC107376.7	26795	SNORD54	small nucleolar RNA, C/D box 54	0	-0.37	0.43	0.69	0.41	-0.85	-2.91	-9.02	-9.02	-9.02	0
gi|115547122|dbj|AK231177.1|	115547122	AK231177.1	Sus scrofa mRNA, clone:ITT010008H11, expressed in intestine		AB028951.2	23097	CDK19	cyclin-dependent kinase 19	0	-1.8	-1.58	-1.19	-1.38	-3.22	-2.03	-2.04	-11.04	-11.04	0
gi|115547124|dbj|AK231179.1|	115547124	AK231179.1	Sus scrofa mRNA, clone:ITT010009H05, expressed in intestine	DDR1	NM_001954.4	780	DDR1	discoidin domain receptor tyrosine kinase 1	0	0.35	0.81	0.37	0.26	-0.7	-0.83	-2.08	-2.68	-4.83	0
gi|115547172|dbj|AK231227.1|	115547172	AK231227.1	Sus scrofa mRNA, clone:ITT010020A09, expressed in intestine		NM_021067.3	9837	GINS1	GINS complex subunit 1 (Psf1 homolog)	0	-1.85	-1.87	-1.91	-2.03	-4.92	-10.92	-10.92	-10.92	-10.92	0
gi|115547186|dbj|AK234559.1|	115547186	AK234559.1	Sus scrofa mRNA, clone:OVR010085B10, expressed in ovary		BC071697.1	55194	FAM176B	family with sequence similarity 176, member B	0	-0.55	-0.87	-1.47	-1.21	-3.18	-3.58	-3.95	-5.06	-5.6	0
gi|115547230|dbj|AK234603.1|	115547230	AK234603.1	Sus scrofa mRNA, clone:OVR010094F08, expressed in ovary		NM_001493.2	2664	GDI1	GDP dissociation inhibitor 1	0	0.1	-0.16	0.41	-0.57	-2.34	-2.12	-2.22	-2.82	-3.45	0
gi|115547264|dbj|AK234637.1|	115547264	AK234637.1	Sus scrofa mRNA, clone:OVR010102B06, expressed in ovary		AK293495.1	26090	ABHD12	abhydrolase domain containing 12	0	-0.52	-0.11	-0.29	-0.87	-1.02	-1.42	-2.28	-4.41	-2.4	0
gi|115547309|dbj|AK234682.1|	115547309	AK234682.1	Sus scrofa mRNA, clone:OVRM10005H07, expressed in ovary	LOC100154978	NM_016022.2	51107	APH1A	anterior pharynx defective 1 homolog A (C. elegans)	0	-3.1	-2.03	-2.32	-2.92	-2.69	-5.29	-11.39	-11.39	-11.39	0
gi|115547313|dbj|AK234686.1|	115547313	AK234686.1	Sus scrofa mRNA, clone:OVRM10006E08, expressed in ovary		NM_024620.3	79673	ZNF329	zinc finger protein 329	0	0.23	0.35	0.53	0.13	-1.91	-1.66	-2.97	-1.13	-1.12	0
gi|115547340|dbj|AK234713.1|	115547340	AK234713.1	Sus scrofa mRNA, clone:OVRM10010D03, expressed in ovary		NM_001163636.1	2969	GTF2I	general transcription factor IIi	0	-1.2	-1.27	-1.32	-1.34	-1.6	-2.83	-2.73	-4.99	-4.1	0
gi|115547361|dbj|AK234734.1|	115547361	AK234734.1	Sus scrofa mRNA, clone:OVRM10012A09, expressed in ovary		AF349951.1	10015	PDCD6IP	programmed cell death 6 interacting protein	0	-1.86	-1.45	-1.55	-1.76	-1.24	-1.93	-1.56	-2.21	-2.85	0
gi|115547362|dbj|AK234735.1|	115547362	AK234735.1	Sus scrofa mRNA, clone:OVRM10012B09, expressed in ovary						0	-0.01	-0.05	-0.25	-1.44	-9.92	-9.92	-9.92	-4.06	-9.92	0
gi|115547364|dbj|AK234737.1|	115547364	AK234737.1	Sus scrofa mRNA, clone:OVRM10012F02, expressed in ovary		AF074264.1	4040	LRP6	low density lipoprotein receptor-related protein 6	0	0.12	0.2	-0.49	0.03	-1.08	-2.24	-1.81	-3.22	-3.3	0
gi|115547371|dbj|AK234744.1|	115547371	AK234744.1	Sus scrofa mRNA, clone:OVRM10012H07, expressed in ovary		AF160499.1	414	ARSD	arylsulfatase D	0	1	1.48	1.72	1.23	0.85	-0.31	-7.73	-7.73	-7.73	0
gi|115547381|dbj|AK237762.1|	115547381	AK237762.1	Sus scrofa mRNA, clone:SPL010092B08, expressed in spleen		NM_001135041.1	1639	DCTN1	dynactin 1 (p150, glued homolog, Drosophila)	0	-0.62	-0.52	-0.37	-0.85	-1.13	-1.43	-2.13	-2.2	-2.25	0
gi|115547390|dbj|AK237771.1|	115547390	AK237771.1	Sus scrofa mRNA, clone:SPL010093G07, expressed in spleen		BC051707.1	114928	GPRASP2	G protein-coupled receptor associated sorting protein 2	0	0.51	0.1	-0.21	-0.46	-4.67	-2.11	-10.67	-10.67	-10.67	0
gi|115547403|dbj|AK237784.1|	115547403	AK237784.1	Sus scrofa mRNA, clone:SPL010096H12, expressed in spleen		AB449881.1	23216	TBC1D1	TBC1 (tre-2/USP6, BUB2, cdc16) domain family, member 1	0	-0.28	-0.45	-0.8	-0.78	-1.31	-2.36	-4.19	-2.48	-2.3	0
gi|115547445|dbj|AK237827.1|	115547445	AK237827.1	Sus scrofa mRNA, clone:SPL010102E01, expressed in spleen		NM_002356.5	4082	MARCKS	myristoylated alanine-rich protein kinase C substrate	0	-0.41	-0.58	-0.36	-0.68	-3.66	-4.09	-3.92	-4.87	-5.6	0
gi|115547447|dbj|AK237829.1|	115547447	AK237829.1	Sus scrofa mRNA, clone:SPL010103D01, expressed in spleen		NM_018270.4	55257	C20orf20	chromosome 20 open reading frame 20	0	0.29	-0.36	-0.64	0.17	-2.12	-1.02	-2.1	-10.44	-10.44	0
gi|115547488|dbj|AK237870.1|	115547488	AK237870.1	Sus scrofa mRNA, clone:TCH010004E04, expressed in trachea						0	-0.94	-0.83	-1.04	-1.06	-1.28	-2.04	-2.92	-2.31	-2.78	0
gi|115547505|dbj|AK237887.1|	115547505	AK237887.1	Sus scrofa mRNA, clone:TCH010007A09, expressed in trachea		NM_007024.4	11070	TMEM115	transmembrane protein 115	0	-0.35	-0.59	-1.04	-0.7	-1.18	-1.78	-3.03	-3.21	-1.51	0
gi|115547606|dbj|AK231264.1|	115547606	AK231264.1	Sus scrofa mRNA, clone:ITT010026A02, expressed in intestine		NM_012095.4	26985	AP3M1	adaptor-related protein complex 3, mu 1 subunit	0	-3.77	-1.94	-2.7	-2.37	-2.67	-10.26	-10.26	-10.26	-10.26	0
gi|115547607|dbj|AK231265.1|	115547607	AK231265.1	Sus scrofa mRNA, clone:ITT010026C07, expressed in intestine		NM_004712.3	9146	HGS	hepatocyte growth factor-regulated tyrosine kinase substrate	0	-0.33	0.18	-0.16	-1.4	-1.16	-1.91	-2.8	-3.73	-2.96	0
gi|115547623|dbj|AK231281.1|	115547623	AK231281.1	Sus scrofa mRNA, clone:ITT010029C08, expressed in intestine		BC038112.1	92597	MOBKL1A	MOB1, Mps One Binder kinase activator-like 1A (yeast)	0	0.78	1.49	1.1	0.59	-1.24	-0.65	-1.03	-2.7	-8.56	0
gi|115547647|dbj|AK231305.1|	115547647	AK231305.1	Sus scrofa mRNA, clone:ITT010034B04, expressed in intestine		NM_006842.2	10992	SF3B2	splicing factor 3b, subunit 2, 145kDa	0	-3.32	-2.94	-3.5	-2.99	-1.45	-5.15	-11.26	-5.4	-11.26	0
gi|115547801|dbj|AK234777.1|	115547801	AK234777.1	Sus scrofa mRNA, clone:OVRM10015C03, expressed in ovary		CR620916.1	25941	C18orf10	chromosome 18 open reading frame 10	0	-0.96	-1.02	-1.14	-1.86	-2.18	-1.76	-2.45	-1.99	-1.42	0
gi|115547803|dbj|AK234779.1|	115547803	AK234779.1	Sus scrofa mRNA, clone:OVRM10015E04, expressed in ovary		BX571747.1	5861	RAB1A	RAB1A, member RAS oncogene family	0	-0.57	-0.53	-0.84	-0.88	-0.9	-2.25	-1.97	-2.66	-3.5	0
gi|115547804|dbj|AK234780.1|	115547804	AK234780.1	Sus scrofa mRNA, clone:OVRM10015F12, expressed in ovary		NM_001042646.1	22906	TRAK1	trafficking protein, kinesin binding 1	0	0.26	0.46	0.83	0.78	-0.75	-0.84	-0.97	-1.1	-1.75	0
gi|115547810|dbj|AK234786.1|	115547810	AK234786.1	Sus scrofa mRNA, clone:OVRM10015H08, expressed in ovary		NM_006693.2	10898	CPSF4	cleavage and polyadenylation specific factor 4, 30kDa	0	-1.11	-1.13	-1.72	-0.86	-1.48	-0.66	-1.59	-1.84	-3.5	0
gi|115547818|dbj|AK234794.1|	115547818	AK234794.1	Sus scrofa mRNA, clone:OVRM10016G04, expressed in ovary		BC136775.1	58517	RBM25	RNA binding motif protein 25	0	0.61	0.58	0.56	0.15	-1.28	-2.04	-2.07	-0.49	-1.91	0
gi|115547827|dbj|AK234803.1|	115547827	AK234803.1	Sus scrofa mRNA, clone:OVRM10018A09, expressed in ovary		NM_030771.1	91057	CCDC34	coiled-coil domain containing 34	0	-0.4	-0.48	-0.89	-1.42	-3.34	-5.47	-3.62	-5.28	-4.37	0
gi|115547833|dbj|AK234809.1|	115547833	AK234809.1	Sus scrofa mRNA, clone:OVRM10018E06, expressed in ovary		AK290127.1	11066	SNRNP35	small nuclear ribonucleoprotein 35kDa (U11/U12)	0	0.46	0.13	-0.34	0.32	-1.04	-0.6	-2.84	-2.5	-1.26	0
gi|115547850|dbj|AK234826.1|	115547850	AK234826.1	Sus scrofa mRNA, clone:OVRM10019G11, expressed in ovary		AK314587.1	9107	MTMR6	myotubularin related protein 6	0	-0.39	-0.4	-0.97	-1.21	-1.83	-1.81	-2.71	-3.24	-1.88	0
gi|115547856|dbj|AK234832.1|	115547856	AK234832.1	Sus scrofa mRNA, clone:OVRM10021A10, expressed in ovary		NM_181443.1	22903	BTBD3	BTB (POZ) domain containing 3	0	-1.75	-1.7	-2.12	-2.66	-4.07	-4.75	-4.31	-2.85	-3.32	0
gi|115547861|dbj|AK234837.1|	115547861	AK234837.1	Sus scrofa mRNA, clone:OVRM10021D09, expressed in ovary		AC013722.8	55571	C2orf29	chromosome 2 open reading frame 29	0	-0.29	-0.34	-0.33	-0.07	-0.87	-1.07	-1.38	-2.94	-1.87	0
gi|115547870|dbj|AK234846.1|	115547870	AK234846.1	Sus scrofa mRNA, clone:OVRM10021G09, expressed in ovary						0	-0.08	0.84	1.52	2.23	0.66	-1.04	-7.15	-1.29	-7.15	0
gi|115547873|dbj|AK234849.1|	115547873	AK234849.1	Sus scrofa mRNA, clone:OVRM10022D05, expressed in ovary						0	-0.29	-0.86	-0.84	-0.83	-1.22	-2.45	-4.82	-4.49	-2.76	0
gi|115547884|dbj|AK234860.1|	115547884	AK234860.1	Sus scrofa mRNA, clone:OVRM10024B08, expressed in ovary		NM_000154.1	2584	GALK1	galactokinase 1	0	-0.29	-0.15	-1.18	-1.85	-3.58	-1.78	-4.04	-4.73	-4.21	0
gi|115547885|dbj|AK234861.1|	115547885	AK234861.1	Sus scrofa mRNA, clone:OVRM10024C01, expressed in ovary		BC150268.1	6830	SUPT6H	suppressor of Ty 6 homolog (S. cerevisiae)	0	-0.3	-0.09	0.18	-0.47	-0.8	-0.58	-1.17	-0.86	-1.95	0
gi|115547909|dbj|AK234885.1|	115547909	AK234885.1	Sus scrofa mRNA, clone:OVRM10026F03, expressed in ovary		NM_000405.4	2760	GM2A	GM2 ganglioside activator	0	-2.29	-1.9	-1.11	-1.62	-9.77	-3.66	-2.24	-9.77	-9.77	0
gi|115547910|dbj|AK234886.1|	115547910	AK234886.1	Sus scrofa mRNA, clone:OVRM10026G10, expressed in ovary		NM_000285.3	5184	PEPD	peptidase D	0	-0.26	-0.1	-0.53	-0.89	0.09	-1.65	-2.52	-3.4	-2.93	0
gi|115547920|dbj|AK234896.1|	115547920	AK234896.1	Sus scrofa mRNA, clone:OVRM10027G10, expressed in ovary		NM_024312.3	79158	GNPTAB	N-acetylglucosamine-1-phosphate transferase, alpha and beta subunits	0	-0.79	-0.59	-0.49	-0.33	-1.38	-2.28	-1.97	-2.63	-2.21	0
gi|115547925|dbj|AK234902.1|	115547925	AK234902.1	Sus scrofa mRNA, clone:OVRM10028E05, expressed in ovary		NM_006230.2	5425	POLD2	polymerase (DNA directed), delta 2, regulatory subunit 50kDa	0	0.25	0.55	0.55	0.52	-1.42	-3.58	-2.01	-2.97	-2.52	0
gi|115547927|dbj|AK234904.1|	115547927	AK234904.1	Sus scrofa mRNA, clone:OVRM10028G03, expressed in ovary		NM_172349.2	64324	NSD1	nuclear receptor binding SET domain protein 1	0	0.13	0.08	-0.19	-0.32	-0.82	-1.33	-1.76	-0.68	-0.88	0
gi|115547950|dbj|AK234927.1|	115547950	AK234927.1	Sus scrofa mRNA, clone:OVRM10032F11, expressed in ovary		NM_001031696.2	23646	PLD3	phospholipase D family, member 3	0	-0.88	-0.76	-0.73	-0.74	-1.79	-1.73	-2.57	-3.15	-2.99	0
gi|115547965|dbj|AK234942.1|	115547965	AK234942.1	Sus scrofa mRNA, clone:OVRM10034H07, expressed in ovary		AF309561.1	59348	ZNF350	zinc finger protein 350	0	-0.34	-0.3	-0.43	-0.41	-1.01	-1.8	-2.37	-4.85	-2.46	0
gi|115547982|dbj|AK237966.1|	115547982	AK237966.1	Sus scrofa mRNA, clone:TCH010021D01, expressed in trachea		BC021969.2	64789	DEM1	defects in morphology 1 homolog (S. cerevisiae)	0	0.28	0.76	0.44	0.25	-0.9	-1.18	-1.87	-3.55	-1.61	0
gi|115547984|dbj|AK237968.1|	115547984	AK237968.1	Sus scrofa mRNA, clone:TCH010021G07, expressed in trachea		AK124656.1	2026	ENO2	enolase 2 (gamma, neuronal)	0	-3.88	-4.98	-2.29	-3.8	-10.37	-10.37	-10.37	-4.51	-10.37	0
gi|115548012|dbj|AK237996.1|	115548012	AK237996.1	Sus scrofa mRNA, clone:TCH010026F04, expressed in trachea		NM_012279.2	23567	ZNF346	zinc finger protein 346	0	-0.1	0.03	-0.62	-0.33	-1.96	-2.1	-2.75	-3.26	-3.91	0
gi|115548018|dbj|AK238002.1|	115548018	AK238002.1	Sus scrofa mRNA, clone:TCH010027A06, expressed in trachea		NM_152243.2	11135	CDC42EP1	CDC42 effector protein (Rho GTPase binding) 1	0	0.33	0	-0.17	-0.24	-0.68	-0.32	-2.93	-2.28	-1.93	0
gi|115548021|dbj|AK238005.1|	115548021	AK238005.1	Sus scrofa mRNA, clone:TCH010027C11, expressed in trachea		AB209390.1	2256	FGF11	fibroblast growth factor 11	0	-0.96	-1.91	-1.39	-1.95	-5.28	-3.17	-11.28	-11.28	-11.28	0
gi|115548048|dbj|AK238032.1|	115548048	AK238032.1	Sus scrofa mRNA, clone:TCH010032F05, expressed in trachea		AK307612.1	6651	SON	SON DNA binding protein	0	-1.44	-2.72	-1.69	-1.55	-1.53	-1.64	-2.33	-10.44	-10.44	0
gi|115548059|dbj|AK238043.1|	115548059	AK238043.1	Sus scrofa mRNA, clone:TCH010033G05, expressed in trachea		AC053545.5	166379	BBS12	Bardet-Biedl syndrome 12	0	-1.8	-1.5	-2.85	-2.04	-2.01	-2.18	-9.61	-2.42	-9.61	0
gi|115548093|dbj|AK238077.1|	115548093	AK238077.1	Sus scrofa mRNA, clone:TCH010039B10, expressed in trachea		NM_001009998.2	170463	SSBP4	single stranded DNA binding protein 4	0	-0.46	-0.49	-0.71	-1.32	-2.56	-4.21	-3.88	-4.79	-4.87	0
gi|115548140|dbj|AK238124.1|	115548140	AK238124.1	Sus scrofa mRNA, clone:TCH010048A12, expressed in trachea		NM_030955.2	81792	ADAMTS12	ADAM metallopeptidase with thrombospondin type 1 motif, 12	0	-3.47	-1.96	-2.32	-3.97	-3.95	-3.85	-10.54	-10.54	-10.54	0
gi|115548150|dbj|AK238134.1|	115548150	AK238134.1	Sus scrofa mRNA, clone:TCH010049G06, expressed in trachea		AC006160.9	27146	FAM184B	family with sequence similarity 184, member B	0	-0.04	-0.51	-1.01	-1.17	-1.47	-1.28	-1.53	-1.52	-2.2	0
gi|115548176|dbj|AK234948.1|	115548176	AK234948.1	Sus scrofa mRNA, clone:OVRM10035D10, expressed in ovary		NM_007178.3	11171	STRAP	serine/threonine kinase receptor associated protein	0	-0.14	-0.44	-0.27	-0.18	-0.35	-0.63	-0.26	-3.29	-2.82	0
gi|115548217|dbj|AK231527.1|	115548217	AK231527.1	Sus scrofa mRNA, clone:ITT010086F03, expressed in intestine	CLTC	NM_004859.3	1213	CLTC	clathrin, heavy chain (Hc)	0	-2.88	-1.96	-2.98	-2.65	-1.45	-10.54	-4	-10.54	-10.54	0
gi|115548230|dbj|AK231444.1|	115548230	AK231444.1	Sus scrofa mRNA, clone:ITT010064F12, expressed in intestine		NM_138559.1	53335	BCL11A	B-cell CLL/lymphoma 11A (zinc finger protein)	0	-3.78	-4.06	-3.02	-4.01	-12.17	-12.17	-12.17	-12.17	-12.17	0
gi|115548314|dbj|AK234971.1|	115548314	AK234971.1	Sus scrofa mRNA, clone:OVRM10037C03, expressed in ovary		NM_145049.3	134510	UBLCP1	ubiquitin-like domain containing CTD phosphatase 1	0	0.16	-0.3	-0.41	-0.4	-2	-0.99	-1.69	-2.71	-2.51	0
gi|115548319|dbj|AK231543.1|	115548319	AK231543.1	Sus scrofa mRNA, clone:ITT010090D06, expressed in intestine		NM_001134693.1	100128731	LOC100128731	dolichyl-diphosphooligosaccharide--protein glycosyltransferase subunit 4	0	-0.33	0.1	0.15	-0.8	-0.62	-1.33	-0.6	-0.65	-1.76	0
gi|115548328|dbj|AK231701.1|	115548328	AK231701.1	Sus scrofa mRNA, clone:LNG010014A06, expressed in lung		AK091209.1	677837	SNORA60	small nucleolar RNA, H/ACA box 60	0	-0.2	-0.39	0.01	-0.55	-2.43	-3.34	-3.57	-5.82	-5.31	0
gi|115548334|dbj|AK231707.1|	115548334	AK231707.1	Sus scrofa mRNA, clone:LNG010014D07, expressed in lung		NM_001436.3	2091	FBL	fibrillarin	0	0.01	-0.09	-0.13	-0.54	-0.03	-0.99	-0.68	-1.31	-0.79	0
gi|115548356|dbj|AK231729.1|	115548356	AK231729.1	Sus scrofa mRNA, clone:LNG010016E01, expressed in lung		AK313774.1	10103	TSPAN1	tetraspanin 1	0	2.39	4.21	4.2	2.19	0.45	-5.55	-5.55	0.3	-5.55	0
gi|115548383|dbj|AK235000.1|	115548383	AK235000.1	Sus scrofa mRNA, clone:OVRM10040B02, expressed in ovary		NM_006405.5	10548	TM9SF1	transmembrane 9 superfamily member 1	0	-1.52	-0.78	-1.39	-1.46	-1.48	-2.38	-2.72	-2.55	-3.41	0
gi|115548388|dbj|AK235005.1|	115548388	AK235005.1	Sus scrofa mRNA, clone:OVRM10040D08, expressed in ovary		AC091046.2	100289060	LOC100289060	guanine nucleotide binding protein (G protein), gamma 10 pseudogene	0	0.04	-0.33	-0.72	0.36	-1.1	-0.96	-1.9	-2.69	-3.49	0
gi|115548389|dbj|AK235006.1|	115548389	AK235006.1	Sus scrofa mRNA, clone:OVRM10040D09, expressed in ovary		AK303453.1	57222	ERGIC1	endoplasmic reticulum-golgi intermediate compartment (ERGIC) 1	0	-1.15	-1.53	-1.79	-2.22	-1.11	-1.31	-1.73	-4.24	-4.64	0
gi|115548394|dbj|AK235011.1|	115548394	AK235011.1	Sus scrofa mRNA, clone:OVRM10041D10, expressed in ovary		AK299335.1	10276	NET1	neuroepithelial cell transforming 1	0	-0.69	-0.48	-0.33	-0.11	-1.4	-2.14	-3.58	-2.89	-3.69	0
gi|115548409|dbj|AK235026.1|	115548409	AK235026.1	Sus scrofa mRNA, clone:OVRM10042E03, expressed in ovary		NM_001814.4	1075	CTSC	cathepsin C	0	-1.24	-1.14	-1.6	-1.01	-2.25	-2.43	-1.69	-2.28	-3.28	0
gi|115548424|dbj|AK235041.1|	115548424	AK235041.1	Sus scrofa mRNA, clone:OVRM10044B05, expressed in ovary		NM_015463.2	25927	CNRIP1	cannabinoid receptor interacting protein 1	0	-0.99	-0.52	-0.24	-0.6	-1.52	-1.57	-1.14	-1.78	-1.94	0
gi|115548431|dbj|AK235048.1|	115548431	AK235048.1	Sus scrofa mRNA, clone:OVRM10044G07, expressed in ovary		CR607579.1	64708	COPS7B	COP9 constitutive photomorphogenic homolog subunit 7B (Arabidopsis)	0	1.6	1.06	1.41	0.62	-1.1	-0.76	-0.22	-1.53	-1.97	0
gi|115548436|dbj|AK235053.1|	115548436	AK235053.1	Sus scrofa mRNA, clone:OVRM10045B11, expressed in ovary		NM_014223.4	4802	NFYC	nuclear transcription factor Y, gamma	0	0.49	0.15	0.2	0.35	-0.36	-0.37	-1.14	-1.89	-1.8	0
gi|115548454|dbj|AK235071.1|	115548454	AK235071.1	Sus scrofa mRNA, clone:OVRM10046F12, expressed in ovary		NM_005324.3	3021	H3F3B	H3 histone, family 3B (H3.3B)	0	0.91	1.01	0.68	0.52	-0.68	0.13	-3.95	-10.49	-10.49	0
gi|115548467|dbj|AK235084.1|	115548467	AK235084.1	Sus scrofa mRNA, clone:OVRM10047G03, expressed in ovary		NM_001142423.1	9643	MORF4L2	mortality factor 4 like 2	0	-0.8	-0.73	-1.31	-1.68	-1.35	-2.37	-1.7	-1.74	-2.32	0
gi|115548504|dbj|AK235121.1|	115548504	AK235121.1	Sus scrofa mRNA, clone:OVRM10051F05, expressed in ovary		NM_017457.4	9266	CYTH2	cytohesin 2	0	0.34	0.9	0.96	0.52	-1.33	-1.7	-1.8	-1.25	-1.43	0
gi|115548511|dbj|AK235128.1|	115548511	AK235128.1	Sus scrofa mRNA, clone:OVRM10052B04, expressed in ovary		AK055109.1	10000	AKT3	v-akt murine thymoma viral oncogene homolog 3 (protein kinase B, gamma)	0	-0.12	0.03	-0.31	-0.3	-2.32	-1.96	-2.79	-3.78	-3.85	0
gi|115548513|dbj|AK235130.1|	115548513	AK235130.1	Sus scrofa mRNA, clone:OVRM10052C05, expressed in ovary		AK296655.1	116461	TSEN15	tRNA splicing endonuclease 15 homolog (S. cerevisiae)	0	0.5	-0.22	-0.83	-0.05	-0.65	-2.21	-2.03	-2.37	-1.69	0
gi|115548514|dbj|AK235131.1|	115548514	AK235131.1	Sus scrofa mRNA, clone:OVRM10052C06, expressed in ovary		BC001923.1	7307	U2AF1	U2 small nuclear RNA auxiliary factor 1	0	-0.36	-0.25	-0.63	-0.71	0.14	-0.51	-1.62	-7.36	-6.42	0
gi|115548520|dbj|AK235137.1|	115548520	AK235137.1	Sus scrofa mRNA, clone:OVRM10052F06, expressed in ovary		BC034956.1	6709	SPTAN1	spectrin, alpha, non-erythrocytic 1 (alpha-fodrin)	0	0.05	0.27	0.56	0.12	-1.87	-2.45	-3.02	-3.37	-2.08	0
gi|115548526|dbj|AK235143.1|	115548526	AK235143.1	Sus scrofa mRNA, clone:OVRM10053B03, expressed in ovary		NM_199327.1	10252	SPRY1	sprouty homolog 1, antagonist of FGF signaling (Drosophila)	0	-1.82	-0.97	-1.1	-1.58	-1.74	-3.35	-3.56	-2.5	-3.19	0
gi|115548554|dbj|AK235171.1|	115548554	AK235171.1	Sus scrofa mRNA, clone:OVRM10055D04, expressed in ovary		AF087894.1	23564	DDAH2	dimethylarginine dimethylaminohydrolase 2	0	1.1	0.74	0.47	-0.55	-3.45	-4.2	-2.92	-2.67	-2.38	0
gi|115548572|dbj|AK231556.1|	115548572	AK231556.1	Sus scrofa mRNA, clone:ITT010093E05, expressed in intestine		NM_004506.3	3298	HSF2	heat shock transcription factor 2	0	0.93	0.2	0.01	0.47	0.32	-0.78	-0.32	-1.25	-2.18	0
gi|115548591|dbj|AK231575.1|	115548591	AK231575.1	Sus scrofa mRNA, clone:ITT010099F11, expressed in intestine		DQ892066.2	113178	SCAMP4	secretory carrier membrane protein 4	0	-0.64	-0.39	-0.43	-0.85	-1.62	-2.44	-2.92	-2.37	-3.67	0
gi|115548634|dbj|AK231618.1|	115548634	AK231618.1	Sus scrofa mRNA, clone:LNG010002B06, expressed in lung		NM_152305.2	56983	KTELC1	KTEL (Lys-Tyr-Glu-Leu) containing 1	0	-0.75	-0.43	-0.7	-0.38	-1.56	-1.97	-1.89	-2.56	-3.1	0
gi|115548725|dbj|AK231791.1|	115548725	AK231791.1	Sus scrofa mRNA, clone:LNG010024D06, expressed in lung		NM_012477.2	23559	WBP1	WW domain binding protein 1	0	0.13	-0.05	-0.65	-1.05	-1.56	-2.35	-2.14	-3.82	-3.89	0
gi|115548727|dbj|AK231793.1|	115548727	AK231793.1	Sus scrofa mRNA, clone:LNG010024D09, expressed in lung		AK296983.1	9877	ZC3H11A	zinc finger CCCH-type containing 11A	0	-1.7	-1.13	-0.18	-0.97	-1.54	-2.02	-1.13	-2.85	-3.22	0
gi|115548734|dbj|AK231800.1|	115548734	AK231800.1	Sus scrofa mRNA, clone:LNG010025E03, expressed in lung		AK094788.1	92745	SLC38A5	solute carrier family 38, member 5	0	-2.62	-1.19	-0.84	-1.65	-1.01	-2.81	-9.92	-9.92	-9.92	0
gi|115548831|dbj|AK231946.1|	115548831	AK231946.1	Sus scrofa mRNA, clone:LNG010056H10, expressed in lung		NM_012293.1	7837	PXDN	peroxidasin homolog (Drosophila)	0	-0.66	-0.5	-0.7	-1	-3.12	-3.29	-4	-4.35	-7.01	0
gi|115548854|dbj|AK235257.1|	115548854	AK235257.1	Sus scrofa mRNA, clone:OVRM10062H10, expressed in ovary		AL137465.1	51684	SUFU	suppressor of fused homolog (Drosophila)	0	-1.09	-0.31	-0.32	-1.19	-2.52	-3.01	-4.31	-11.43	-4.64	0
gi|115548860|dbj|AK235263.1|	115548860	AK235263.1	Sus scrofa mRNA, clone:OVRM10063E02, expressed in ovary		BC014903.1	26269	FBXO8	F-box protein 8	0	-0.84	-0.48	-1.5	0.37	-0.32	-1.16	-3.31	-3.99	-2.74	0
gi|115548868|dbj|AK235271.1|	115548868	AK235271.1	Sus scrofa mRNA, clone:OVRM10063H12, expressed in ovary		NM_024836.1	79894	ZNF672	zinc finger protein 672	0	-0.13	0.22	0.07	0.26	-1.02	-1.62	-3.39	-2.99	-2.6	0
gi|115548882|dbj|AK235285.1|	115548882	AK235285.1	Sus scrofa mRNA, clone:OVRM10065C01, expressed in ovary		BC001179.1	3069	HDLBP	high density lipoprotein binding protein	0	-0.09	-0.1	-0.02	-0.29	-1.1	-1.4	-1.15	-1.38	-2.18	0
gi|115548883|dbj|AK235286.1|	115548883	AK235286.1	Sus scrofa mRNA, clone:OVRM10065C03, expressed in ovary		BC010570.1	3155	HMGCL	3-hydroxymethyl-3-methylglutaryl-Coenzyme A lyase	0	-0.39	0.03	-0.03	0.03	-0.15	-0.74	-1.17	-0.44	-1.23	0
gi|115548917|dbj|AK235320.1|	115548917	AK235320.1	Sus scrofa mRNA, clone:OVRM10068E04, expressed in ovary		NM_006062.2	10322	SMYD5	SMYD family member 5	0	-0.27	-0.26	-0.37	-0.59	-0.62	-1.8	-1.27	-2.68	-1.84	0
gi|115548919|dbj|AK235322.1|	115548919	AK235322.1	Sus scrofa mRNA, clone:OVRM10068F05, expressed in ovary		NM_014408.3	27095	TRAPPC3	trafficking protein particle complex 3	0	-1.27	-0.69	-0.7	-0.89	-2.04	-2.35	-2.83	-2.27	-2.11	0
gi|115548922|dbj|AK235325.1|	115548922	AK235325.1	Sus scrofa mRNA, clone:OVRM10069A02, expressed in ovary	SFRS2	BC001303.2	6427	SFRS2	splicing factor, arginine/serine-rich 2	0	-0.56	-0.3	-0.42	-0.49	-1	-2.53	-1.97	-3.35	-3.23	0
gi|115548933|dbj|AK235336.1|	115548933	AK235336.1	Sus scrofa mRNA, clone:OVRM10070A07, expressed in ovary		NM_030782.3	81037	CLPTM1L	CLPTM1-like	0	-0.97	-1.4	-1.51	-1.4	-0.82	-1.49	-2.61	-3.02	-4.68	0
gi|115548942|dbj|AK235345.1|	115548942	AK235345.1	Sus scrofa mRNA, clone:OVRM10071B07, expressed in ovary		NM_004529.2	4300	MLLT3	myeloid/lymphoid or mixed-lineage leukemia (trithorax homolog, Drosophila); translocated to, 3	0	1.19	1.45	0.96	0.27	-2.37	-2.18	-2.75	-0.78	-1.67	0
gi|115548954|dbj|AK235357.1|	115548954	AK235357.1	Sus scrofa mRNA, clone:OVRM10072B12, expressed in ovary	RHOB	NM_004040.2	388	RHOB	ras homolog gene family, member B	0	0.39	0.86	1.52	1.05	-1	-1.44	-1.47	-1.58	-4.14	0
gi|115548956|dbj|AK235359.1|	115548956	AK235359.1	Sus scrofa mRNA, clone:OVRM10072C12, expressed in ovary		NM_018243.2	55752	11-Sep	septin 11	0	-1.6	-1.82	-2.33	-2.94	-3.44	-5.05	-5.33	-7	-8.9	0
gi|115548982|dbj|AK238171.1|	115548982	AK238171.1	Sus scrofa mRNA, clone:TCH010055G04, expressed in trachea		NM_002840.3	5792	PTPRF	protein tyrosine phosphatase, receptor type, F	0	-1.87	-2.3	-2.6	-2.33	-3.68	-4.57	-5.95	-12.49	-12.49	0
gi|115549020|dbj|AK238209.1|	115549020	AK238209.1	Sus scrofa mRNA, clone:TCH010063B08, expressed in trachea		DQ894354.2	9569	GTF2IRD1	GTF2I repeat domain containing 1	0	0.15	0.18	-0.85	-1.22	-2.69	-9.69	-9.69	-9.69	-9.69	0
gi|115549057|dbj|AK238246.1|	115549057	AK238246.1	Sus scrofa mRNA, clone:TCH010067D03, expressed in trachea		NM_025160.6	80232	WDR26	WD repeat domain 26	0	-0.3	-0.49	-0.51	-0.47	-0.1	-1.55	-0.92	-3.01	-2.47	0
gi|115549072|dbj|AK238261.1|	115549072	AK238261.1	Sus scrofa mRNA, clone:TCH010070B06, expressed in trachea		NM_000129.3	2162	F13A1	coagulation factor XIII, A1 polypeptide	0	0.92	-2.81	-1.73	-1.07	-1.49	-8.81	-8.81	-2.95	-8.81	0
gi|115549179|dbj|AK231855.1|	115549179	AK231855.1	Sus scrofa mRNA, clone:LNG010033A05, expressed in lung		BC008251.1	83451	ABHD11	abhydrolase domain containing 11	0	-0.89	-1.14	-1.41	-1.75	-0.93	-2.84	-2.58	-2.7	-2.87	0
gi|115549180|dbj|AK231856.1|	115549180	AK231856.1	Sus scrofa mRNA, clone:LNG010033C06, expressed in lung		AK303012.1	10013	HDAC6	histone deacetylase 6	0	-0.27	-0.3	-0.57	-0.89	-1.67	-1.82	-2.77	-3.59	-3.84	0
gi|115549219|dbj|AK231895.1|	115549219	AK231895.1	Sus scrofa mRNA, clone:LNG010043D11, expressed in lung		NM_007006.2	11051	NUDT21	nudix (nucleoside diphosphate linked moiety X)-type motif 21	0	-0.01	-0.37	-0.32	-1.02	-1.04	-1.68	-2.34	-2.49	-2.76	0
gi|115549245|dbj|AK231921.1|	115549245	AK231921.1	Sus scrofa mRNA, clone:LNG010046G07, expressed in lung		NM_018393.3	55346	TCP11L1	t-complex 11 (mouse)-like 1	0	-0.67	-0.58	-0.84	-1.23	-2.57	-2.82	-3.52	-2.43	-3.01	0
gi|115549258|dbj|AK235178.1|	115549258	AK235178.1	Sus scrofa mRNA, clone:OVRM10055H08, expressed in ovary		BC004186.2	2782	GNB1	guanine nucleotide binding protein (G protein), beta polypeptide 1	0	-0.93	-0.63	-0.69	-0.79	-1.8	-3.75	-3.12	-4.79	-5.14	0
gi|115549275|dbj|AK235196.1|	115549275	AK235196.1	Sus scrofa mRNA, clone:OVRM10057D10, expressed in ovary						0	-1.26	-1.04	-1.3	-1.42	-1.25	-3.24	-2.59	-3.44	-3.24	0
gi|115549286|dbj|AK235207.1|	115549286	AK235207.1	Sus scrofa mRNA, clone:OVRM10058B05, expressed in ovary		AY358634.1	757	TMEM50B	transmembrane protein 50B	0	0.36	-0.14	-0.54	-0.85	-0.25	-0.65	-1.84	-1.55	-1.2	0
gi|115549295|dbj|AK235216.1|	115549295	AK235216.1	Sus scrofa mRNA, clone:OVRM10058F12, expressed in ovary		AK293245.1	6764	ST5	suppression of tumorigenicity 5	0	-0.61	-0.29	-0.35	-0.11	-0.58	-0.65	-1.69	-2.14	-2.43	0
gi|115549306|dbj|AK235227.1|	115549306	AK235227.1	Sus scrofa mRNA, clone:OVRM10059E01, expressed in ovary		BC031556.1	25827	FBXL2	F-box and leucine-rich repeat protein 2	0	-1.17	-2.07	-2.61	-1.44	-3.59	-3.07	-3.64	-4.32	-2.39	0
gi|115549315|dbj|AK235236.1|	115549315	AK235236.1	Sus scrofa mRNA, clone:OVRM10060D09, expressed in ovary						0	2.21	0.63	0.2	0.01	-0.37	-0.26	-7.37	-7.37	-7.37	0
gi|115549321|dbj|AK232099.1|	115549321	AK232099.1	Sus scrofa mRNA, clone:LNG010079F08, expressed in lung		NM_004484.3	2719	GPC3	glypican 3	0	-3.97	-3.43	-3.65	-4.37	-5.09	-13.27	-13.27	-13.27	-13.27	0
gi|115549338|dbj|AK232116.1|	115549338	AK232116.1	Sus scrofa mRNA, clone:LNG010081E07, expressed in lung		NM_001112718.1	22998	LIMCH1	LIM and calponin homology domains 1	0	-0.42	0.21	0.23	0.24	-0.54	-1.45	-1.24	-0.56	-1.11	0
gi|115549347|dbj|AK232125.1|	115549347	AK232125.1	Sus scrofa mRNA, clone:LNG010082E01, expressed in lung						0	-1.14	-1.28	-1.52	-1.51	-1.27	-1.98	-1.97	-10.08	-10.08	0
gi|115549354|dbj|AK232132.1|	115549354	AK232132.1	Sus scrofa mRNA, clone:LNG010085C10, expressed in lung						0	0.37	0.03	0.04	-0.04	0.58	-1.37	-2.93	-0.9	-1.88	0
gi|115549359|dbj|AK235381.1|	115549359	AK235381.1	Sus scrofa mRNA, clone:OVRM10075B05, expressed in ovary		NM_004538.4	4675	NAP1L3	nucleosome assembly protein 1-like 3	0	-1.66	-2.01	-1.99	-1.46	-2.27	-3.36	-4.74	-4.41	-3.03	0
gi|115549388|dbj|AK235410.1|	115549388	AK235410.1	Sus scrofa mRNA, clone:OVRM10078D10, expressed in ovary		BC065007.1	1656	DDX6	DEAD (Asp-Glu-Ala-Asp) box polypeptide 6	0	-0.48	-1.19	-1.04	-0.45	-0.8	-0.7	-2.14	-2.28	-4.05	0
gi|115549396|dbj|AK235418.1|	115549396	AK235418.1	Sus scrofa mRNA, clone:OVRM10079D12, expressed in ovary		NM_138394.3	92906	HNRPLL	heterogeneous nuclear ribonucleoprotein L-like	0	-1.61	-0.89	-0.86	-1.35	-1.97	-2.71	-3.08	-2.29	-2.37	0
gi|115549428|dbj|AK235450.1|	115549428	AK235450.1	Sus scrofa mRNA, clone:OVRM10083B05, expressed in ovary		BC012348.1	2783	GNB2	guanine nucleotide binding protein (G protein), beta polypeptide 2	0	-0.7	-0.79	-0.78	-0.99	-1.58	-1.83	-1.92	-4.61	-4.66	0
gi|115549454|dbj|AK235476.1|	115549454	AK235476.1	Sus scrofa mRNA, clone:OVRM10085F08, expressed in ovary		NM_016656.3	10325	RRAGB	Ras-related GTP binding B	0	-0.16	-0.25	-0.51	0.07	-0.07	-1.14	-2.2	-1.49	-1.62	0
gi|115549455|dbj|AK235477.1|	115549455	AK235477.1	Sus scrofa mRNA, clone:OVRM10085F09, expressed in ovary		NM_014494.2	27327	TNRC6A	trinucleotide repeat containing 6A	0	-0.71	-1.05	-0.75	-0.9	-2.13	-2.1	-2.9	-3.13	-3.02	0
gi|115549474|dbj|AK235496.1|	115549474	AK235496.1	Sus scrofa mRNA, clone:OVRM10087D03, expressed in ovary		CR590274.1	10856	RUVBL2	RuvB-like 2 (E. coli)	0	-0.66	-0.5	-0.27	-0.84	-0.69	-2.52	-2.22	-2.14	-2.34	0
gi|115549486|dbj|AK235508.1|	115549486	AK235508.1	Sus scrofa mRNA, clone:OVRM10089A04, expressed in ovary		BC050627.1	9061	PAPSS1	3'-phosphoadenosine 5'-phosphosulfate synthase 1	0	-1.25	-1.39	-1.98	-2.26	-3.51	-6.61	-5.5	-5.59	-6.25	0
gi|115549511|dbj|AK235533.1|	115549511	AK235533.1	Sus scrofa mRNA, clone:OVRM10091B03, expressed in ovary		NM_015299.2	23351	KHNYN	KH and NYN domain containing	0	0.27	0.83	0.46	-0.49	-2.4	-1.53	-3.19	-3.53	-2.54	0
gi|115549536|dbj|AK235558.1|	115549536	AK235558.1	Sus scrofa mRNA, clone:OVRM10093C06, expressed in ovary		NM_144641.2	132160	PPM1M	protein phosphatase 1M (PP2C domain containing)	0	-1.02	-1.48	-1.53	-1.37	-1.5	-0.03	-1.89	-2.43	-2.64	0
gi|115549537|dbj|AK235559.1|	115549537	AK235559.1	Sus scrofa mRNA, clone:OVRM10093C11, expressed in ovary		NM_001098272.1	3157	HMGCS1	3-hydroxy-3-methylglutaryl-Coenzyme A synthase 1 (soluble)	0	-2.43	-2.23	-3.52	-3.37	-2.51	-4.39	-4.08	-5.27	-5.02	0
gi|115549544|dbj|AK235566.1|	115549544	AK235566.1	Sus scrofa mRNA, clone:OVRM10093F05, expressed in ovary		NM_002553.2	5001	ORC5L	origin recognition complex, subunit 5-like (yeast)	0	-0.39	-0.67	-1.14	-0.49	-2.08	-3.3	-1.99	-4.12	-3.4	0
gi|115549549|dbj|AK235571.1|	115549549	AK235571.1	Sus scrofa mRNA, clone:OVRM10094A08, expressed in ovary		AK300363.1	3980	LIG3	ligase III, DNA, ATP-dependent	0	-0.44	-0.4	-0.45	-0.91	-1.36	-1.51	-3.2	-2.75	-2.44	0
gi|115549562|dbj|AK238370.1|	115549562	AK238370.1	Sus scrofa mRNA, clone:TCH010092H06, expressed in trachea		NM_014824.2	9873	FCHSD2	FCH and double SH3 domains 2	0	-2.4	-1.23	-1.26	-1.13	0.91	-3.66	-3.8	-10.34	-10.34	0
gi|115549571|dbj|AK238379.1|	115549571	AK238379.1	Sus scrofa mRNA, clone:TCH010094D11, expressed in trachea		NM_032890.2	84976	DISP1	dispatched homolog 1 (Drosophila)	0	-0.91	0.42	0.28	0.13	-0.8	-1.6	-1.49	-2.28	-3.01	0
gi|115549606|dbj|AK238414.1|	115549606	AK238414.1	Sus scrofa mRNA, clone:TCH010103G08, expressed in trachea		NM_003621.2	8495	PPFIBP2	PTPRF interacting protein, binding protein 2 (liprin beta 2)	0	0.12	1.49	1.36	0.96	-3.06	-0.55	-9.65	-9.65	-9.65	0
gi|115549608|dbj|AK238416.1|	115549608	AK238416.1	Sus scrofa mRNA, clone:TCH010103A05, expressed in trachea		NM_001127227.1	966	CD59	CD59 molecule, complement regulatory protein	0	0.07	0.87	-0.09	0.22	-0.94	-0.75	-1.62	-1.61	-1.77	0
gi|115549631|dbj|AK238439.1|	115549631	AK238439.1	Sus scrofa mRNA, clone:TES010021B08, expressed in testis		NM_015426.4	25886	WDR51A	WD repeat domain 51A	0	-1.81	-2.74	-3.71	-3.92	-9.47	-9.47	-9.47	-9.47	-9.47	0
gi|115549680|dbj|AK231959.1|	115549680	AK231959.1	Sus scrofa mRNA, clone:LNG010058B11, expressed in lung		NM_001312.2	1397	CRIP2	cysteine-rich protein 2	0	1.28	1.72	1.73	0.8	-1.28	-1.52	-2.35	-2.39	-1.87	0
gi|115549682|dbj|AK231961.1|	115549682	AK231961.1	Sus scrofa mRNA, clone:LNG010058D04, expressed in lung		AK291152.1	3397	ID1	inhibitor of DNA binding 1, dominant negative helix-loop-helix protein	0	-3.63	-3.28	-3.35	-4.14	-2.37	-9.69	-9.69	-9.69	-9.69	0
gi|115549693|dbj|AK231972.1|	115549693	AK231972.1	Sus scrofa mRNA, clone:LNG010059B06, expressed in lung		NM_001100430.1	5910	RAP1GDS1	RAP1, GTP-GDP dissociation stimulator 1	0	-1.14	-0.38	-0.23	-0.31	-3.59	-3.87	-2.12	-4.11	-2.34	0
gi|115549698|dbj|AK231977.1|	115549698	AK231977.1	Sus scrofa mRNA, clone:LNG010059D09, expressed in lung		NM_015681.3	27077	B9D1	B9 protein domain 1	0	0.31	-0.09	-1.15	-1.34	-1.49	-2.4	-9.08	-9.08	-9.08	0
gi|115549709|dbj|AK231988.1|	115549709	AK231988.1	Sus scrofa mRNA, clone:LNG010061B12, expressed in lung		AB097047.1	10945	KDELR1	KDEL (Lys-Asp-Glu-Leu) endoplasmic reticulum protein retention receptor 1	0	-0.59	-0.43	-1.15	-1.37	-1.96	-0.24	-2.21	-2.88	-2.18	0
gi|115549725|dbj|AK232004.1|	115549725	AK232004.1	Sus scrofa mRNA, clone:LNG010063F02, expressed in lung		NM_016474.4	51244	C3orf19	chromosome 3 open reading frame 19	0	0.36	0.59	0.92	0.45	-1.19	-0.95	-1.4	-2.33	-1.27	0
gi|115549809|dbj|AK232089.1|	115549809	AK232089.1	Sus scrofa mRNA, clone:LNG010077E07, expressed in lung		AC079169.32	1968	EIF2S3	eukaryotic translation initiation factor 2, subunit 3 gamma, 52kDa	0	-0.48	-0.62	-0.83	-0.85	-1.75	-2.29	-2.52	-2.49	-2.36	0
gi|115549831|dbj|AK238491.1|	115549831	AK238491.1	Sus scrofa mRNA, clone:TES010041B04, expressed in testis		NM_181505.2	84152	PPP1R1B	protein phosphatase 1, regulatory (inhibitor) subunit 1B	0	0.68	0.3	0.34	-0.07	-8.81	-1.12	-8.81	-8.81	-8.81	0
gi|115549859|dbj|AK238519.1|	115549859	AK238519.1	Sus scrofa mRNA, clone:TES010050E07, expressed in testis		EU176319.1	5214	PFKP	phosphofructokinase, platelet	0	-0.73	-0.47	-0.51	-0.09	-1.39	-1.4	-1.61	-1.76	-2.11	0
gi|115549887|dbj|AK238547.1|	115549887	AK238547.1	Sus scrofa mRNA, clone:TES010064F01, expressed in testis		NM_014604.2	30851	TAX1BP3	Tax1 (human T-cell leukemia virus type I) binding protein 3	0	-1.24	-0.82	-1.17	-1.66	-1.41	-3.21	-3.2	-10.32	-10.32	0
gi|115549901|dbj|AK232135.1|	115549901	AK232135.1	Sus scrofa mRNA, clone:LNG010085G11, expressed in lung		NM_014280.2	22826	DNAJC8	DnaJ (Hsp40) homolog, subfamily C, member 8	0	-0.38	-0.29	-0.55	-0.46	-0.82	-1.53	-2.52	-2.45	-2.04	0
gi|115549945|dbj|AK232180.1|	115549945	AK232180.1	Sus scrofa mRNA, clone:LNG010097B04, expressed in lung		NM_001082486.1	65057	ACD	adrenocortical dysplasia homolog (mouse)	0	0.31	0.24	0.13	0.17	-1.04	-1.85	-2.84	-2.09	-2.85	0
gi|115549950|dbj|AK232185.1|	115549950	AK232185.1	Sus scrofa mRNA, clone:LNG010098G05, expressed in lung	LOC100157287	NM_003913.4	8899	PRPF4B	PRP4 pre-mRNA processing factor 4 homolog B (yeast)	0	-0.91	-0.88	-0.4	-1.08	-1.13	-2.17	-1.64	-1.79	-1.74	0
gi|115549963|dbj|AK232198.1|	115549963	AK232198.1	Sus scrofa mRNA, clone:LNG010102B02, expressed in lung		AK311974.1	27243	CHMP2A	chromatin modifying protein 2A	0	0.3	0.24	0.21	-0.04	-0.58	-0.74	-0.96	-1.09	-0.79	0
gi|115550000|dbj|AK232235.1|	115550000	AK232235.1	Sus scrofa mRNA, clone:LNG010110B06, expressed in lung		NM_007056.2	11129	SFRS16	splicing factor, arginine/serine-rich 16	0	0.75	0.81	1.07	0.3	-0.99	-0.59	-2.16	-0.37	-1.32	0
gi|115550035|dbj|AK232270.1|	115550035	AK232270.1	Sus scrofa mRNA, clone:LVR010009H01, expressed in liver		AK290566.1	10126	DNAL4	dynein, axonemal, light chain 4	0	-0.95	-0.58	-0.84	-0.67	-1.67	-1.69	-2.44	-1.28	-3.18	0
gi|115550048|dbj|AK232283.1|	115550048	AK232283.1	Sus scrofa mRNA, clone:LVR010012A06, expressed in liver		NM_024066.1	79033	ERI3	ERI1 exoribonuclease family member 3	0	-0.38	-0.23	-0.6	-1.16	-0.93	-1.19	-1.76	-2.12	-1.63	0
gi|115550094|dbj|AK232329.1|	115550094	AK232329.1	Sus scrofa mRNA, clone:LVR010020D03, expressed in liver		BC003176.1	55748	CNDP2	CNDP dipeptidase 2 (metallopeptidase M20 family)	0	-1.09	-1.26	-1.22	-1.59	-2.1	-2.35	-1.92	-1.96	-1.88	0
gi|115550099|dbj|AK235578.1|	115550099	AK235578.1	Sus scrofa mRNA, clone:OVRM10094F03, expressed in ovary		NM_015156.2	23186	RCOR1	REST corepressor 1	0	-0.1	-0.67	-0.94	-1.06	-1.66	-1.57	-1.93	-4.18	-3.41	0
gi|115550120|dbj|AK235599.1|	115550120	AK235599.1	Sus scrofa mRNA, clone:OVRM10096C01, expressed in ovary		NM_001143780.1	51629	SLC25A39	solute carrier family 25, member 39	0	-0.12	-0.21	-0.1	-0.78	0.04	-1.21	-0.75	-1.6	-0.87	0
gi|115550133|dbj|AK235612.1|	115550133	AK235612.1	Sus scrofa mRNA, clone:OVRM10098A07, expressed in ovary		BC036298.1	871	SERPINH1	serpin peptidase inhibitor, clade H (heat shock protein 47), member 1, (collagen binding protein 1)	0	-0.44	-0.61	-0.42	-1.18	-2.49	-3.72	-3.29	-2.22	-3.16	0
gi|115550149|dbj|AK235628.1|	115550149	AK235628.1	Sus scrofa mRNA, clone:OVRM10099B12, expressed in ovary		NM_014153.2	29066	ZC3H7A	zinc finger CCCH-type containing 7A	0	-0.35	-0.71	-1.15	-0.71	-1.36	-1.28	-1.89	-2.74	-2.47	0
gi|115550154|dbj|AK235633.1|	115550154	AK235633.1	Sus scrofa mRNA, clone:OVRM10099F10, expressed in ovary		AC013413.6	57159	TRIM54	tripartite motif-containing 54	0	-2.13	-0.49	-1.02	-1.68	-2.09	-1.99	-10.42	-3.23	-10.42	0
gi|115550155|dbj|AK235634.1|	115550155	AK235634.1	Sus scrofa mRNA, clone:OVRM10099G12, expressed in ovary		NM_001044305.1	60682	SMAP1	small ArfGAP 1	0	-1.87	-1.09	-1.02	-1.5	-1.41	-2.23	-2.4	-1.74	-2.16	0
gi|115550169|dbj|AK235648.1|	115550169	AK235648.1	Sus scrofa mRNA, clone:OVRM10101B09, expressed in ovary		BC064619.1	100133941	CD24	CD24 molecule	0	-6.99	-8.05	-6.98	-5.9	-6.46	-7.95	-14.05	-7.61	-14.05	0
gi|115550178|dbj|AK235657.1|	115550178	AK235657.1	Sus scrofa mRNA, clone:OVRM10101G03, expressed in ovary		BC094784.1	1024	CDK8	cyclin-dependent kinase 8	0	-1.21	-1.15	-1.17	-0.83	-1.93	-2.83	-2.4	-5.66	-3.61	0
gi|115550185|dbj|AK235664.1|	115550185	AK235664.1	Sus scrofa mRNA, clone:OVRM10102E03, expressed in ovary		NM_015167.2	23210	JMJD6	jumonji domain containing 6	0	0.25	-0.04	1.11	0.38	-0.09	-0.61	-0.86	-2.85	-2.22	0
gi|115550191|dbj|AK235670.1|	115550191	AK235670.1	Sus scrofa mRNA, clone:OVRM10102H08, expressed in ovary		NM_018403.4	55802	DCP1A	DCP1 decapping enzyme homolog A (S. cerevisiae)	0	-0.99	-0.52	-0.65	-0.57	-1.37	-2.16	-2.43	-2.1	-2.59	0
gi|115550206|dbj|AK235685.1|	115550206	AK235685.1	Sus scrofa mRNA, clone:OVRM10104A09, expressed in ovary		AK296115.1	54883	CWC25	CWC25 spliceosome-associated protein homolog (S. cerevisiae)	0	-0.21	-0.2	-0.41	-0.31	-0.69	-1.59	-1.83	-9.69	-9.69	0
gi|115550216|dbj|AK235695.1|	115550216	AK235695.1	Sus scrofa mRNA, clone:OVRM10105F04, expressed in ovary		NM_001135812.1	58516	FAM60A	family with sequence similarity 60, member A	0	0.53	0.96	0.64	0.45	-3.2	-9.2	-9.2	-3.35	-9.2	0
gi|115550217|dbj|AK235696.1|	115550217	AK235696.1	Sus scrofa mRNA, clone:OVRM10105F06, expressed in ovary		NM_001071775.2	440145	C13orf37	chromosome 13 open reading frame 37	0	-0.21	-0.27	-0.35	-0.63	-1.23	-2.09	-1.66	-1.74	-2.64	0
gi|115550230|dbj|AK235709.1|	115550230	AK235709.1	Sus scrofa mRNA, clone:OVRM10106G04, expressed in ovary		BC033181.1	91010	FMNL3	formin-like 3	0	-1.68	-1.21	-0.99	-1.72	-3.68	-4.85	-3.65	-4.2	-3.89	0
gi|115550257|dbj|AK235736.1|	115550257	AK235736.1	Sus scrofa mRNA, clone:OVRM10110C04, expressed in ovary		NM_024057.2	79023	NUP37	nucleoporin 37kDa	0	0.23	0.24	0.04	0.32	-0.38	-1.71	-0.73	-3.95	-6.21	0
gi|115550273|dbj|AK235752.1|	115550273	AK235752.1	Sus scrofa mRNA, clone:OVRM10111E11, expressed in ovary		NM_016292.2	10131	TRAP1	TNF receptor-associated protein 1	0	0.03	0.03	-0.15	-0.42	-0.08	-0.53	-1.53	-1.9	-1.43	0
gi|115550292|dbj|AK235771.1|	115550292	AK235771.1	Sus scrofa mRNA, clone:OVRM10113H04, expressed in ovary		NM_153260.2	255252	LRRC57	leucine rich repeat containing 57	0	1.09	1.01	0.91	0.76	-0.68	-0.51	-0.78	-4.47	-4.4	0
gi|115550296|dbj|AK238561.1|	115550296	AK238561.1	Sus scrofa mRNA, clone:TES010070F01, expressed in testis		NM_025149.4	80221	ACSF2	acyl-CoA synthetase family member 2	0	-3.3	-3.37	-2.03	-1.99	-9.37	-1.94	-9.37	-9.37	-9.37	0
gi|115550321|dbj|AK238586.1|	115550321	AK238586.1	Sus scrofa mRNA, clone:THY010001A12, expressed in thymus		AK096376.1	10066	SCAMP2	secretory carrier membrane protein 2	0	-0.69	-0.33	-0.55	-0.54	-0.86	-1.87	-1.46	-1.02	-1.38	0
gi|115550322|dbj|AK238587.1|	115550322	AK238587.1	Sus scrofa mRNA, clone:THY010001B05, expressed in thymus		AK289521.1	56912	C11orf60	chromosome 11 open reading frame 60	0	-0.15	0.31	0.4	0.71	-1.49	-1.93	-1.5	-10.49	-10.49	0
gi|115550332|dbj|AK238597.1|	115550332	AK238597.1	Sus scrofa mRNA, clone:THY010003H09, expressed in thymus		AC087190.5	29035	C16orf72	chromosome 16 open reading frame 72	0	-0.25	-0.07	-0.3	-0.61	-1.15	-2.04	-1.71	-1.72	-1.92	0
gi|115550342|dbj|AK238607.1|	115550342	AK238607.1	Sus scrofa mRNA, clone:THY010006B12, expressed in thymus		BC010136.2	55197	RPRD1A	regulation of nuclear pre-mRNA domain containing 1A	0	-0.39	-0.82	-0.75	-0.69	-1.88	-2.43	-2.74	-3.21	-2.52	0
gi|115550346|dbj|AK238611.1|	115550346	AK238611.1	Sus scrofa mRNA, clone:THY010006E04, expressed in thymus		AF063591.1	4345	CD200	CD200 molecule	0	-1.91	-1.85	-1.79	-1.49	-4.3	-5.19	-11.3	-11.3	-11.3	0
gi|115550351|dbj|AK238616.1|	115550351	AK238616.1	Sus scrofa mRNA, clone:THY010007C03, expressed in thymus		NM_001619.3	156	ADRBK1	adrenergic, beta, receptor kinase 1	0	-1.38	-0.94	-1.27	-1.53	-1.5	-1.43	-1.82	-2.86	-3.61	0
gi|115550352|dbj|AK238617.1|	115550352	AK238617.1	Sus scrofa mRNA, clone:THY010007C11, expressed in thymus		NM_020820.3	57580	PREX1	phosphatidylinositol-3,4,5-trisphosphate-dependent Rac exchange factor 1	0	-1.16	-0.98	-1.19	-1.07	-2.75	-4.23	-2.81	-3.9	-10.34	0
gi|115550390|dbj|AK238655.1|	115550390	AK238655.1	Sus scrofa mRNA, clone:THY010014E09, expressed in thymus		AC097372.3	345051	hCG_38984	hCG38984	0	-0.38	-0.51	-0.26	-1.07	-1.57	-1.74	-2.31	-2.25	-2.37	0
gi|115550394|dbj|AK238659.1|	115550394	AK238659.1	Sus scrofa mRNA, clone:THY010014H09, expressed in thymus		AK225790.1	114908	TMEM123	transmembrane protein 123	0	-0.03	0.2	0.05	-0.22	-1.53	-2.65	-1.69	-4.74	-3.97	0
gi|115550416|dbj|AK238681.1|	115550416	AK238681.1	Sus scrofa mRNA, clone:THY010016G06, expressed in thymus		NM_003797.2	8726	EED	embryonic ectoderm development	0	-0.32	-0.27	-0.39	-0.1	-1.08	-1.64	-1.12	-0.76	-1.67	0
gi|115550441|dbj|AK238706.1|	115550441	AK238706.1	Sus scrofa mRNA, clone:THY010019D09, expressed in thymus		AF087851.1	56925	LXN	latexin	0	-1.09	-0.85	-0.93	-0.37	-3.47	-4.91	-2.25	-3.27	-5.22	0
gi|115550443|dbj|AK238708.1|	115550443	AK238708.1	Sus scrofa mRNA, clone:THY010019E03, expressed in thymus		NM_005198.4	1120	CHKB	choline kinase beta	0	0.72	1.1	0.92	0.81	0.93	0	-1.65	-0.95	-0.94	0
gi|115550464|dbj|AK238729.1|	115550464	AK238729.1	Sus scrofa mRNA, clone:THY010022A01, expressed in thymus		AK057832.1	84811	BUD13	BUD13 homolog (S. cerevisiae)	0	-0.5	-0.75	-1.42	-0.91	-1.65	-2.07	-3.32	-2.14	-2.07	0
gi|115550469|dbj|AK238734.1|	115550469	AK238734.1	Sus scrofa mRNA, clone:THY010022E10, expressed in thymus		NM_006831.2	10978	CLP1	CLP1, cleavage and polyadenylation factor I subunit, homolog (S. cerevisiae)	0	-0.77	-0.43	-0.53	-0.64	-3.42	-1.62	-2.3	-3.55	-3.31	0
gi|115550476|dbj|AK238741.1|	115550476	AK238741.1	Sus scrofa mRNA, clone:THY010023D05, expressed in thymus		NM_001127322.1	23468	CBX5	chromobox homolog 5 (HP1 alpha homolog, Drosophila)	0	-4.24	-3.76	-4.66	-3.76	-3.09	-4.99	-12.42	-12.42	-12.42	0
gi|115550487|dbj|AK238752.1|	115550487	AK238752.1	Sus scrofa mRNA, clone:THY010026C01, expressed in thymus		NM_006496.2	2773	GNAI3	guanine nucleotide binding protein (G protein), alpha inhibiting activity polypeptide 3	0	-2.09	-1.35	-2.02	-2.64	-4.19	-4.19	-5.24	-5.42	-5.14	0
gi|115550499|dbj|AK232331.1|	115550499	AK232331.1	Sus scrofa mRNA, clone:LVR010020F02, expressed in liver		NM_000199.3	6448	SGSH	N-sulfoglucosamine sulfohydrolase	0	-0.54	-0.55	-0.87	-2.49	-4.8	-11.38	-11.38	-4.19	-5.6	0
gi|115550522|dbj|AK232352.1|	115550522	AK232352.1	Sus scrofa mRNA, clone:LVR010026F04, expressed in liver		NM_031491.2	83758	RBP5	retinol binding protein 5, cellular	0	2.16	2.23	2.49	1.15	-0.56	-7.88	-7.88	-7.88	-2.1	0
gi|115550600|dbj|AK232430.1|	115550600	AK232430.1	Sus scrofa mRNA, clone:LVR010045E01, expressed in liver		NM_006854.3	11014	KDELR2	KDEL (Lys-Asp-Glu-Leu) endoplasmic reticulum protein retention receptor 2	0	0.67	0.11	-0.71	-1.53	-1.6	-2.74	-2.96	-3.85	-4.93	0
gi|115550629|dbj|AK232459.1|	115550629	AK232459.1	Sus scrofa mRNA, clone:LVR010050A10, expressed in liver		NM_015710.4	29997	GLTSCR2	glioma tumor suppressor candidate region gene 2	0	0.99	0.71	0.73	0.42	-0.71	-1.55	-1.86	-2.94	-1.61	0
gi|115550665|dbj|AK232495.1|	115550665	AK232495.1	Sus scrofa mRNA, clone:LVR010054D05, expressed in liver		BC101572.1	55787	CXorf15	chromosome X open reading frame 15	0	0.35	-0.85	-0.8	-0.05	-1.26	-1.35	-2.72	-9.26	-9.26	0
gi|115550694|dbj|AK232524.1|	115550694	AK232524.1	Sus scrofa mRNA, clone:LVR010062B03, expressed in liver	LOC100154763	AK056370.1	51347	TAOK3	TAO kinase 3	0	0.74	0.25	0.09	-0.31	-2.36	-1.27	-2.25	-2.7	-1.33	0
gi|115550717|dbj|AK235791.1|	115550717	AK235791.1	Sus scrofa mRNA, clone:OVRM10115E09, expressed in ovary		BC001586.2	54850	FBXL12	F-box and leucine-rich repeat protein 12	0	0.23	-0.36	-0.6	-1.23	-1.05	-1.34	-1.74	-3.25	-1.75	0
gi|115550737|dbj|AK235811.1|	115550737	AK235811.1	Sus scrofa mRNA, clone:OVRM10117G08, expressed in ovary		AC099050.2	100287638	LOC100287638	hypothetical LOC100287638	0	-0.56	-0.54	-0.51	-0.7	-2.31	-1.66	-2.23	-1.6	-1.79	0
gi|115550755|dbj|AK235829.1|	115550755	AK235829.1	Sus scrofa mRNA, clone:OVRM10118G07, expressed in ovary		AB097052.1	9798	KIAA0174	KIAA0174	0	-0.83	-0.42	-0.75	-0.76	-2.14	-2.3	-2.05	-2.57	-4.07	0
gi|115550758|dbj|AK235833.1|	115550758	AK235833.1	Sus scrofa mRNA, clone:OVRM10119B05, expressed in ovary		NM_003766.3	8678	BECN1	beclin 1, autophagy related	0	-0.72	-0.38	-0.11	-0.72	-1.11	-1.58	-1.37	-1.37	-2.09	0
gi|115550785|dbj|AK235860.1|	115550785	AK235860.1	Sus scrofa mRNA, clone:OVRM10120H12, expressed in ovary		NM_001261.3	1025	CDK9	cyclin-dependent kinase 9	0	-0.2	-0.09	-0.09	-0.39	-0.86	-0.66	-1.24	-0.77	-0.74	0
gi|115550788|dbj|AK235863.1|	115550788	AK235863.1	Sus scrofa mRNA, clone:OVRM10121B03, expressed in ovary		AK296238.1	51379	CRLF3	cytokine receptor-like factor 3	0	0	-0.5	-2.43	-0.56	-1.18	-1.86	-2.65	-3.33	-9.77	0
gi|115550804|dbj|AK235879.1|	115550804	AK235879.1	Sus scrofa mRNA, clone:OVRM10122D03, expressed in ovary		NG_012649.1	84168	ANTXR1	anthrax toxin receptor 1	0	-1.61	-1.25	-2.08	-2.15	-2.84	-3.39	-11.3	-4.86	-5.52	0
gi|115550812|dbj|AK235887.1|	115550812	AK235887.1	Sus scrofa mRNA, clone:OVRM10122G10, expressed in ovary		NM_018093.2	54663	WDR74	WD repeat domain 74	0	0	-0.19	-0.1	-0.56	-0.95	-1.44	-2.37	-1.68	-1.92	0
gi|115550817|dbj|AK235892.1|	115550817	AK235892.1	Sus scrofa mRNA, clone:OVRM10123D02, expressed in ovary		BC000359.2	23478	SEC11A	SEC11 homolog A (S. cerevisiae)	0	-0.87	-0.44	-0.8	-1.08	-2.36	-2.49	-2.06	-1.75	-2.58	0
gi|115550819|dbj|AK235894.1|	115550819	AK235894.1	Sus scrofa mRNA, clone:OVRM10123D07, expressed in ovary		AK001475.1	54552	GNL3L	guanine nucleotide binding protein-like 3 (nucleolar)-like	0	0.78	0.7	0.3	0.43	0.41	-0.14	-0.68	-1.6	-1.38	0
gi|115550866|dbj|AK235941.1|	115550866	AK235941.1	Sus scrofa mRNA, clone:OVRM10127D07, expressed in ovary						0	-0.08	-0.4	-0.49	-0.83	-1.3	-0.93	-1.5	-10.21	-10.21	0
gi|115550869|dbj|AK235944.1|	115550869	AK235944.1	Sus scrofa mRNA, clone:OVRM10127F05, expressed in ovary		NM_001145306.1	1021	CDK6	cyclin-dependent kinase 6	0	0.04	0.11	-0.23	-0.14	-3.45	-3.35	-10.77	-10.77	-4.4	0
gi|115550874|dbj|AK235949.1|	115550874	AK235949.1	Sus scrofa mRNA, clone:OVRM10128E11, expressed in ovary		NM_145290.2	166647	GPR125	G protein-coupled receptor 125	0	-1.07	-1.24	-1.23	-1.88	-2.54	-2.68	-2.01	-2.08	-2.44	0
gi|115550882|dbj|AK235957.1|	115550882	AK235957.1	Sus scrofa mRNA, clone:OVRM10128H08, expressed in ovary		NM_006363.4	10483	SEC23B	Sec23 homolog B (S. cerevisiae)	0	-3.8	-3.88	-2.15	-3.46	-3.01	-10.61	-10.61	-10.61	-10.61	0
gi|115550886|dbj|AK235961.1|	115550886	AK235961.1	Sus scrofa mRNA, clone:OVRM10129E06, expressed in ovary						0	0.51	0.46	0.38	0.86	-1.19	-1.96	-2.3	-4.79	-10.65	0
gi|115550895|dbj|AK235970.1|	115550895	AK235970.1	Sus scrofa mRNA, clone:OVRM10131C02, expressed in ovary		AK297980.1	64175	LEPRE1	leucine proline-enriched proteoglycan (leprecan) 1	0	0.14	0.81	0.34	-0.29	-1.96	-3.35	-4.23	-4.91	-2.66	0
gi|115550896|dbj|AK235971.1|	115550896	AK235971.1	Sus scrofa mRNA, clone:OVRM10131C07, expressed in ovary		NM_001143830.1	2620	GAS2	growth arrest-specific 2	0	-2.34	-2.58	-3.65	-3.29	-5.58	-6.92	-8.3	-6.16	-8.46	0
gi|115550899|dbj|AK238760.1|	115550899	AK238760.1	Sus scrofa mRNA, clone:THY010026H02, expressed in thymus		NM_016059.4	51645	PPIL1	peptidylprolyl isomerase (cyclophilin)-like 1	0	-0.33	-0.55	-0.64	-0.75	-1.22	-2.25	-1.44	-3	-4.73	0
gi|115550918|dbj|AK238779.1|	115550918	AK238779.1	Sus scrofa mRNA, clone:THY010029G04, expressed in thymus		NM_023009.5	65108	MARCKSL1	MARCKS-like 1	0	0.09	-0.45	-0.97	-1.79	-5.02	-4.93	-4.91	-6.16	-13.03	0
gi|115550943|dbj|AK238804.1|	115550943	AK238804.1	Sus scrofa mRNA, clone:THY010032C08, expressed in thymus		BX537412.1	1781	DYNC1I2	dynein, cytoplasmic 1, intermediate chain 2	0	-2.11	-2.07	-2.19	-2.56	-2.38	-2.8	-3.18	-3.74	-3.82	0
gi|115550946|dbj|AK238807.1|	115550946	AK238807.1	Sus scrofa mRNA, clone:THY010033A05, expressed in thymus		BC008866.2	27166	PRELID1	PRELI domain containing 1	0	0.05	-0.47	-0.77	-0.78	-1.73	-3.3	-3.04	-3.1	-4.46	0
gi|115550961|dbj|AK238822.1|	115550961	AK238822.1	Sus scrofa mRNA, clone:THY010034G05, expressed in thymus	SLC16A1	NM_003051.3	6566	SLC16A1	solute carrier family 16, member 1 (monocarboxylic acid transporter 1)	0	0.49	0.33	0.34	-0.1	1.3	-1.11	-0.49	-1.1	-1.84	0
gi|115550971|dbj|AK238832.1|	115550971	AK238832.1	Sus scrofa mRNA, clone:THY010035E06, expressed in thymus		NM_014494.2	27327	TNRC6A	trinucleotide repeat containing 6A	0	-0.22	-0.42	-0.26	0.07	-1.52	-1.47	-2.07	-2.63	-2.54	0
gi|115550975|dbj|AK238836.1|	115550975	AK238836.1	Sus scrofa mRNA, clone:THY010035H09, expressed in thymus		NM_031992.1	7458	EIF4H	eukaryotic translation initiation factor 4H	0	0.53	0.41	0.35	0.33	0.01	-0.05	-0.95	-0.67	-1.02	0
gi|115550976|dbj|AK238837.1|	115550976	AK238837.1	Sus scrofa mRNA, clone:THY010035H12, expressed in thymus		AK289480.1	339487	ZBTB8OS	zinc finger and BTB domain containing 8 opposite strand	0	-0.94	-0.91	-0.76	-1.07	-0.85	-2.01	-1.97	-2.37	-2.43	0
gi|115550982|dbj|AK238843.1|	115550982	AK238843.1	Sus scrofa mRNA, clone:THY010036B11, expressed in thymus		NM_001159746.1	29	ABR	active BCR-related gene	0	0.25	0	-0.23	-0.32	-2.63	-2.44	-2.59	-1.99	-2.75	0
gi|115550998|dbj|AK238859.1|	115550998	AK238859.1	Sus scrofa mRNA, clone:THY010038E04, expressed in thymus		NM_003925.1	8930	MBD4	methyl-CpG binding domain protein 4	0	-0.67	-0.64	-0.95	-1.12	-1.9	-2.61	-3.01	-2.2	-2.4	0
gi|115551001|dbj|AK238862.1|	115551001	AK238862.1	Sus scrofa mRNA, clone:THY010039B06, expressed in thymus	LOC100157342	NM_006815.3	10959	TMED2	transmembrane emp24 domain trafficking protein 2	0	-1.01	-0.91	-1.05	-0.8	-0.71	-1	-1.57	-3.05	-2.83	0
gi|115551006|dbj|AK238867.1|	115551006	AK238867.1	Sus scrofa mRNA, clone:THY010039F11, expressed in thymus		NM_015562.1	26043	UBXN7	UBX domain protein 7	0	-0.78	-0.59	-0.37	-0.5	-1.14	-2.52	-2.87	-2.58	-3.54	0
gi|115551072|dbj|AK238933.1|	115551072	AK238933.1	Sus scrofa mRNA, clone:THY010048E05, expressed in thymus		CR608769.1	91283	C9orf30	chromosome 9 open reading frame 30	0	-1.99	-1.45	-1.41	-1.13	-1.75	-1.46	-2.22	-3.37	-3.77	0
gi|115551073|dbj|AK238934.1|	115551073	AK238934.1	Sus scrofa mRNA, clone:THY010048F02, expressed in thymus		NM_001123385.1	54880	BCOR	BCL6 co-repressor	0	-0.23	-0.24	-0.25	0.14	-1.24	-1.23	-3.43	-4.85	-2.59	0
gi|115551074|dbj|AK238935.1|	115551074	AK238935.1	Sus scrofa mRNA, clone:THY010048G05, expressed in thymus		NM_138396.4	92979	9-Mar	membrane-associated ring finger (C3HC4) 9	0	0.42	0.27	0.85	0.5	-1.69	-0.11	0.1	-4.16	-3.65	0
gi|115551090|dbj|AK238951.1|	115551090	AK238951.1	Sus scrofa mRNA, clone:THY010050H04, expressed in thymus		NM_012110.2	26511	CHIC2	cysteine-rich hydrophobic domain 2	0	0.1	0.36	0.45	-0.12	-0.33	-1.36	-1.14	-0.73	-0.85	0
gi|115551134|dbj|AK232567.1|	115551134	AK232567.1	Sus scrofa mRNA, clone:LVR010083E07, expressed in liver		EU176788.1	5002	SLC22A18	solute carrier family 22, member 18	0	1.1	2.6	1.42	0.01	-8.14	-8.14	-8.14	-2.29	-8.14	0
gi|115551165|dbj|AK232598.1|	115551165	AK232598.1	Sus scrofa mRNA, clone:LVR010095E09, expressed in liver	ASB6	NM_017873.2	140459	ASB6	ankyrin repeat and SOCS box-containing 6	0	-1.58	-1.05	-1.24	-1.5	-1.14	-1.75	-3.78	-3.87	-3.21	0
gi|115551173|dbj|AK232606.1|	115551173	AK232606.1	Sus scrofa mRNA, clone:LVR010098E04, expressed in liver		AK298354.1	63894	C14orf133	chromosome 14 open reading frame 133	0	-1.34	-0.97	-1.22	-1.22	-1.39	-2.02	-2.28	-3.79	-2.67	0
gi|115551189|dbj|AK232622.1|	115551189	AK232622.1	Sus scrofa mRNA, clone:LVR010101B12, expressed in liver		NM_031412.2	23710	GABARAPL1	GABA(A) receptor-associated protein like 1	0	-0.51	-0.38	-0.67	-1.17	-0.22	-1.3	-2.5	-2.68	-2.87	0
gi|115551201|dbj|AK232634.1|	115551201	AK232634.1	Sus scrofa mRNA, clone:LVR010102G12, expressed in liver		NM_152288.2	93129	ORAI3	ORAI calcium release-activated calcium modulator 3	0	-1.48	-0.56	-1.53	-1.26	-2.7	-3.6	-10.29	-4.43	-10.29	0
gi|115551216|dbj|AK232649.1|	115551216	AK232649.1	Sus scrofa mRNA, clone:LVR010105F03, expressed in liver		NM_177424.2	23673	STX12	syntaxin 12	0	-0.98	-1.03	-1.59	-0.75	-0.79	-0.89	-1.19	-3	-3.69	0
gi|115551239|dbj|AK232672.1|	115551239	AK232672.1	Sus scrofa mRNA, clone:LVRM10002C06, expressed in liver		NM_017693.3	54841	BIVM	basic, immunoglobulin-like variable motif containing	0	-0.38	-0.7	-1.29	-0.46	-0.64	-1.91	-2.92	-2.7	-3.89	0
gi|115551283|dbj|AK232717.1|	115551283	AK232717.1	Sus scrofa mRNA, clone:LVRM10011E06, expressed in liver		BC003556.1	9097	USP14	ubiquitin specific peptidase 14 (tRNA-guanine transglycosylase)	0	-0.38	-0.58	-0.88	-0.78	-0.73	-1.11	-0.84	-3.02	-1.72	0
gi|115551304|dbj|AK235982.1|	115551304	AK235982.1	Sus scrofa mRNA, clone:OVRM10132B07, expressed in ovary		AK308223.1	10283	CWC27	CWC27 spliceosome-associated protein homolog (S. cerevisiae)	0	-0.43	-0.56	-0.32	-0.54	-0.64	-1.78	-1.29	-1.83	-2.16	0
gi|115551350|dbj|AK236028.1|	115551350	AK236028.1	Sus scrofa mRNA, clone:OVRM10140A03, expressed in ovary		AY358465.1	11253	MAN1B1	mannosidase, alpha, class 1B, member 1	0	1.55	0.85	1.14	1.2	-0.89	-2.46	-2.53	-3.08	-4.54	0
gi|115551364|dbj|AK236042.1|	115551364	AK236042.1	Sus scrofa mRNA, clone:OVRM10147F11, expressed in ovary		AB013341.1	5892	RAD51L3	RAD51-like 3 (S. cerevisiae)	0	-2.57	-2.35	-2.22	-1.99	-3.82	-4.04	-11.15	-11.15	-11.15	0
gi|115551374|dbj|AK236052.1|	115551374	AK236052.1	Sus scrofa mRNA, clone:OVRM10148C10, expressed in ovary		BC039733.1	5806	PTX3	pentraxin-related gene, rapidly induced by IL-1 beta	0	-0.94	-1.08	-0.77	-1.39	-2.8	-4.53	-3.85	-5.77	-5.68	0
gi|115551383|dbj|AK236061.1|	115551383	AK236061.1	Sus scrofa mRNA, clone:OVRM10149C07, expressed in ovary		AK313317.1	1676	DFFA	DNA fragmentation factor, 45kDa, alpha polypeptide	0	0.64	-0.18	-0.44	-0.21	-0.84	-0.87	-2.51	-2.34	-1.99	0
gi|115551387|dbj|AK236065.1|	115551387	AK236065.1	Sus scrofa mRNA, clone:OVRM10149E08, expressed in ovary	RAB14	NM_016322.3	51552	RAB14	RAB14, member RAS oncogene family	0	0.33	-0.16	0.21	0.18	-0.63	-0.92	-0.98	-4.55	-3.9	0
gi|115551391|dbj|AK236069.1|	115551391	AK236069.1	Sus scrofa mRNA, clone:OVRM10150A10, expressed in ovary		AK316520.1	54700	RRN3	RRN3 RNA polymerase I transcription factor homolog (S. cerevisiae)	0	-0.13	0.41	0.28	0.63	-0.13	-1.23	-0.53	-0.97	-2.67	0
gi|115551397|dbj|AK236075.1|	115551397	AK236075.1	Sus scrofa mRNA, clone:OVRM10150E10, expressed in ovary		AK097055.1	2926	GRSF1	G-rich RNA sequence binding factor 1	0	-0.23	-0.41	-0.55	-0.66	-0.62	-0.75	-0.79	-1.1	-2.1	0
gi|115551404|dbj|AK236082.1|	115551404	AK236082.1	Sus scrofa mRNA, clone:OVRM10151A07, expressed in ovary						0	-0.63	-1.05	-1.15	-0.99	-1.55	-9.37	-9.37	-2.93	-9.37	0
gi|115551406|dbj|AK236084.1|	115551406	AK236084.1	Sus scrofa mRNA, clone:OVRM10151B08, expressed in ovary						0	-0.49	-0.15	-0.91	-1.1	0.39	-2.68	-9.37	-3.51	-9.37	0
gi|115551411|dbj|AK236089.1|	115551411	AK236089.1	Sus scrofa mRNA, clone:OVRM10151D07, expressed in ovary		BC098565.1	6455	SH3GL1	SH3-domain GRB2-like 1	0	-3.99	-2.83	-1.71	-2.9	-3.47	-10.05	-10.05	-10.05	-10.05	0
gi|115551432|dbj|AK236110.1|	115551432	AK236110.1	Sus scrofa mRNA, clone:OVRM10153B12, expressed in ovary		AK289704.1	6117	RPA1	replication protein A1, 70kDa	0	-0.97	-1.1	-1.15	-1.34	-1.84	-2.19	-2.43	-1.87	-2.3	0
gi|115551444|dbj|AK236122.1|	115551444	AK236122.1	Sus scrofa mRNA, clone:OVRM10154C08, expressed in ovary		NM_002827.2	5770	PTPN1	protein tyrosine phosphatase, non-receptor type 1	0	0.11	-0.21	0.08	-0.73	-0.56	-1.93	-2.67	-10.21	-10.21	0
gi|115551446|dbj|AK236124.1|	115551446	AK236124.1	Sus scrofa mRNA, clone:OVRM10154E03, expressed in ovary						0	-0.64	-1.07	-2.89	-2.5	-3.65	-9.65	-9.65	-9.65	-9.65	0
gi|115551455|dbj|AK236133.1|	115551455	AK236133.1	Sus scrofa mRNA, clone:OVRM10155E04, expressed in ovary		NM_031925.2	83862	TMEM120A	transmembrane protein 120A	0	-1.15	-0.61	-0.83	-1.12	-0.69	-2.02	-2.91	-2.99	-3.65	0
gi|115551459|dbj|AK236137.1|	115551459	AK236137.1	Sus scrofa mRNA, clone:OVRM10156C12, expressed in ovary		NM_018255.1	55250	ELP2	elongation protein 2 homolog (S. cerevisiae)	0	0.12	0.08	-0.39	-0.08	0.19	-0.51	-1.89	-1.62	-1.97	0
gi|115551465|dbj|AK236143.1|	115551465	AK236143.1	Sus scrofa mRNA, clone:OVRM10156F12, expressed in ovary		NM_001145409.1	4841	NONO	non-POU domain containing, octamer-binding	0	-3.51	-3.2	-3.17	-3.51	-2.72	-2.56	-5.13	-12.25	-12.25	0
gi|115551476|dbj|AK236154.1|	115551476	AK236154.1	Sus scrofa mRNA, clone:OVRM10158C12, expressed in ovary		AK225918.1	6871	TADA2A	transcriptional adaptor 2A	0	-0.74	-0.56	-1.38	-1.67	-1.25	-2.15	-1.9	-2.96	-3.1	0
gi|115551482|dbj|AK236160.1|	115551482	AK236160.1	Sus scrofa mRNA, clone:OVRM10159A01, expressed in ovary		NM_004854.3	9486	CHST10	carbohydrate sulfotransferase 10	0	-1.07	-1.04	-1.03	-1.66	-2.78	-2.55	-2.25	-4.14	-4.58	0
gi|115551497|dbj|AK238961.1|	115551497	AK238961.1	Sus scrofa mRNA, clone:THY010052B02, expressed in thymus		NM_001130.5	166	AES	amino-terminal enhancer of split	0	-0.75	-0.65	-0.84	-1.12	-1.4	-1.48	-2.55	-2.77	-2.41	0
gi|115551503|dbj|AK238967.1|	115551503	AK238967.1	Sus scrofa mRNA, clone:THY010052E09, expressed in thymus		NM_016359.3	51203	NUSAP1	nucleolar and spindle associated protein 1	0	-3.9	-4.15	-3.8	-4.41	-5.56	-11.56	-11.56	-11.56	-11.56	0
gi|115551511|dbj|AK238975.1|	115551511	AK238975.1	Sus scrofa mRNA, clone:THY010052G10, expressed in thymus		NM_004153.2	4998	ORC1L	origin recognition complex, subunit 1-like (yeast)	0	-1.5	-1.67	-1.79	-2.46	-3.94	-10.94	-3.82	-10.94	-10.94	0
gi|115551539|dbj|AK239003.1|	115551539	AK239003.1	Sus scrofa mRNA, clone:THY010055B11, expressed in thymus		AK001760.1	55252	ASXL2	additional sex combs like 2 (Drosophila)	0	-0.8	-1.15	-1.44	-1.41	-1.19	-2.27	-3.83	-1.18	-2.99	0
gi|115551564|dbj|AK239028.1|	115551564	AK239028.1	Sus scrofa mRNA, clone:THY010057G07, expressed in thymus		NM_003675.3	8559	PRPF18	PRP18 pre-mRNA processing factor 18 homolog (S. cerevisiae)	0	-0.44	-0.83	-0.76	-0.67	-0.71	-1.51	-1.29	-1.8	-2.1	0
gi|115551591|dbj|AK239055.1|	115551591	AK239055.1	Sus scrofa mRNA, clone:THY010059F11, expressed in thymus		NM_207396.2	388591	RNF207	ring finger protein 207	0	-1.04	-1.17	-1.38	-1.49	-0.84	-1.62	-1.91	-3.3	-2.14	0
gi|115551607|dbj|AK239071.1|	115551607	AK239071.1	Sus scrofa mRNA, clone:THY010060H01, expressed in thymus		NM_014736.4	9768	KIAA0101	KIAA0101	0	-0.39	-0.56	-0.86	-1	-4.48	-6.37	-5.94	-4.81	-6.7	0
gi|115551615|dbj|AK239079.1|	115551615	AK239079.1	Sus scrofa mRNA, clone:THY010061D10, expressed in thymus		AF193806.1	3964	LGALS8	lectin, galactoside-binding, soluble, 8	0	-0.99	-0.42	-0.6	-1.51	-0.74	-2.33	-4.07	-4.16	-4.83	0
gi|115551640|dbj|AK239104.1|	115551640	AK239104.1	Sus scrofa mRNA, clone:THY010063H06, expressed in thymus		NM_006445.3	10594	PRPF8	PRP8 pre-mRNA processing factor 8 homolog (S. cerevisiae)	0	0.07	-0.25	-0.17	-0.29	-0.58	-0.94	-1.1	-2.87	-1.55	0
gi|115551670|dbj|AK239134.1|	115551670	AK239134.1	Sus scrofa mRNA, clone:THY010066A06, expressed in thymus		NM_003164.3	6811	STX5	syntaxin 5	0	-0.1	-0.32	-0.84	-0.33	-0.82	-1.24	-2.87	-4.29	-1.77	0
gi|115551673|dbj|AK239137.1|	115551673	AK239137.1	Sus scrofa mRNA, clone:THY010066E02, expressed in thymus		NM_014458.3	27252	KLHL20	kelch-like 20 (Drosophila)	0	-1.16	-2.21	-2.57	-1.79	-2.09	-3.88	-3.26	-2.6	-3	0
gi|115551675|dbj|AK239139.1|	115551675	AK239139.1	Sus scrofa mRNA, clone:THY010066F10, expressed in thymus		BC004296.1	23299	BICD2	bicaudal D homolog 2 (Drosophila)	0	-0.56	-0.18	-0.21	-0.43	-0.83	-1.23	-1.5	-0.84	-0.81	0
gi|115551685|dbj|AK239149.1|	115551685	AK239149.1	Sus scrofa mRNA, clone:THY010067H02, expressed in thymus		CR607085.1	55125	CEP192	centrosomal protein 192kDa	0	-0.78	-0.67	-0.71	-1.31	-3.73	-2.24	-4.09	-3.76	-4.47	0
gi|115551691|dbj|AK230600.1|	115551691	AK230600.1	Sus scrofa mRNA, clone:AMP010014H06, expressed in alveolar macrophage	----	NM_006520.2	6990	DYNLT3	dynein, light chain, Tctex-type 3	0	-0.82	-1.05	-1.17	-0.85	-2.51	-2.27	-1.63	-2.22	-3	0
gi|115551787|dbj|AK236193.1|	115551787	AK236193.1	Sus scrofa mRNA, clone:OVRM10162C07, expressed in ovary		NM_001659.2	377	ARF3	ADP-ribosylation factor 3	0	-0.14	-0.22	-0.66	-0.96	-3.38	-4.12	-4.02	-11.55	-11.55	0
gi|115551792|dbj|AK236198.1|	115551792	AK236198.1	Sus scrofa mRNA, clone:OVRM10162H07, expressed in ovary		NM_000313.3	5627	PROS1	protein S (alpha)	0	-1.48	-2.2	-2.67	-1.27	-9.42	-3.31	-9.42	-9.42	-9.42	0
gi|115551805|dbj|AK236211.1|	115551805	AK236211.1	Sus scrofa mRNA, clone:OVRM10163H11, expressed in ovary		NG_015843.1	64131	XYLT1	xylosyltransferase I	0	-0.85	-0.97	-1.27	-2.04	-1.83	-2.51	-3.88	-4.56	-3.31	0
gi|115551807|dbj|AK236213.1|	115551807	AK236213.1	Sus scrofa mRNA, clone:OVRM10164B11, expressed in ovary		BC002774.1	23580	CDC42EP4	CDC42 effector protein (Rho GTPase binding) 4	0	-3.34	-4.15	-3.81	-4	-3.15	-1.88	-10.15	-10.15	-10.15	0
gi|115551828|dbj|AK236235.1|	115551828	AK236235.1	Sus scrofa mRNA, clone:OVRM10166F08, expressed in ovary		NM_001610.2	53	ACP2	acid phosphatase 2, lysosomal	0	0.66	0.41	0.4	0.77	-0.31	-0.59	-1.45	-1.33	-2.2	0
gi|115551834|dbj|AK236241.1|	115551834	AK236241.1	Sus scrofa mRNA, clone:OVRM10167D09, expressed in ovary		BC032754.1	29127	RACGAP1	Rac GTPase activating protein 1	0	0.22	-0.86	-1.23	-0.98	-4.3	-4.72	-3.77	-6.77	-6.25	0
gi|115551836|dbj|AK236243.1|	115551836	AK236243.1	Sus scrofa mRNA, clone:OVRM10167F02, expressed in ovary		CR749463.1	81555	YIPF5	Yip1 domain family, member 5	0	-2.21	-1.82	-2.35	-2.54	-1.37	-3.58	-9.69	-9.69	-9.69	0
gi|115551842|dbj|AK236249.1|	115551842	AK236249.1	Sus scrofa mRNA, clone:OVRM10168C03, expressed in ovary		NM_006373.3	10493	VAT1	vesicle amine transport protein 1 homolog (T. californica)	0	-1.02	-0.91	-1.28	-1.54	-2.95	-3.59	-4.74	-3.55	-4.24	0
gi|115551880|dbj|AK236287.1|	115551880	AK236287.1	Sus scrofa mRNA, clone:OVRM10172H11, expressed in ovary		NM_024894.2	79954	NOL10	nucleolar protein 10	0	1.35	0.97	0.75	0.98	0.02	-1.11	-1	-3.25	-3.32	0
gi|115551885|dbj|AK236292.1|	115551885	AK236292.1	Sus scrofa mRNA, clone:OVRM10174A06, expressed in ovary		AF103802.4	10181	RBM5	RNA binding motif protein 5	0	-3.21	-2.55	-2.52	-3.3	-1.78	-4.18	-3.33	-10.87	-10.87	0
gi|115551933|dbj|AK236340.1|	115551933	AK236340.1	Sus scrofa mRNA, clone:OVRM10183B04, expressed in ovary		BC033339.1	204851	HIPK1	homeodomain interacting protein kinase 1	0	0.22	-0.29	-0.18	-0.19	-0.88	-0.2	-1.5	-2.79	-2.28	0
gi|115551938|dbj|AK236345.1|	115551938	AK236345.1	Sus scrofa mRNA, clone:OVRM10183G02, expressed in ovary		AC116992.2	7325	UBE2E2	ubiquitin-conjugating enzyme E2E 2 (UBC4/5 homolog, yeast)	0	-0.92	-0.49	-0.35	-0.23	-1.11	-1.35	-1.59	-3.66	-4.03	0
gi|115551966|dbj|AK239159.1|	115551966	AK239159.1	Sus scrofa mRNA, clone:THY010069C06, expressed in thymus		NM_001017408.1	57120	GOPC	golgi-associated PDZ and coiled-coil motif containing	0	-1.17	-0.75	-0.99	-1.05	-1.25	-2.19	-1.28	-2.64	-2.96	0
gi|115551993|dbj|AK239186.1|	115551993	AK239186.1	Sus scrofa mRNA, clone:THY010071D01, expressed in thymus		NM_005915.4	4175	MCM6	minichromosome maintenance complex component 6	0	-0.3	-0.99	-1.58	-1.36	-3.04	-4.23	-3.9	-6.74	-5.32	0
gi|115552005|dbj|AK239198.1|	115552005	AK239198.1	Sus scrofa mRNA, clone:THY010074A06, expressed in thymus		NM_001114172.1	8503	PIK3R3	phosphoinositide-3-kinase, regulatory subunit 3 (gamma)	0	-0.85	-1.58	-2.09	-2.79	-3.43	-2.5	-4.49	-2.74	-3.36	0
gi|115552035|dbj|AK239228.1|	115552035	AK239228.1	Sus scrofa mRNA, clone:THY010080G02, expressed in thymus		AK314210.1	3978	LIG1	ligase I, DNA, ATP-dependent	0	0.6	0.2	0.2	-0.22	-3.52	-4.41	-3.98	-2.84	-10.52	0
gi|115552037|dbj|AK239230.1|	115552037	AK239230.1	Sus scrofa mRNA, clone:THY010080H07, expressed in thymus		AK001353.1	54478	FAM64A	family with sequence similarity 64, member A	0	-0.9	-1.16	-1.64	-2.3	-11.57	-11.57	-11.57	-11.57	-11.57	0
gi|115552039|dbj|AK239232.1|	115552039	AK239232.1	Sus scrofa mRNA, clone:THY010081C08, expressed in thymus		NM_015131.1	23160	WDR43	WD repeat domain 43	0	-0.61	-1.3	-1.29	-0.86	-0.04	-1.53	-2.1	-3.08	-4.17	0
gi|115552057|dbj|AK239250.1|	115552057	AK239250.1	Sus scrofa mRNA, clone:THY010085B03, expressed in thymus		AK308109.1	5898	RALA	v-ral simian leukemia viral oncogene homolog A (ras related)	0	-1.13	-0.36	-0.53	-1.36	-2.16	-2.38	-3.3	-1.81	-2.22	0
gi|115552064|dbj|AK239257.1|	115552064	AK239257.1	Sus scrofa mRNA, clone:THY010086F09, expressed in thymus		NM_001142565.1	79869	CPSF7	cleavage and polyadenylation specific factor 7, 59kDa	0	-1	-0.87	-0.69	-0.66	-2.05	-2.4	-3.14	-5.81	-5.89	0
gi|115552080|dbj|AK239273.1|	115552080	AK239273.1	Sus scrofa mRNA, clone:THY010088A07, expressed in thymus	LOC100154789	NM_001143842.1	79022	TMEM106C	transmembrane protein 106C	0	-1.75	-1.74	-1.19	-1.83	-2.58	-3.07	-3.12	-7.12	-12.98	0
gi|115552097|dbj|AK239290.1|	115552097	AK239290.1	Sus scrofa mRNA, clone:THY010089B12, expressed in thymus		AK090933.1	27230	SERP1	stress-associated endoplasmic reticulum protein 1	0	-0.92	-0.88	-1.08	-1.34	-2.2	-3.21	-3.03	-2.96	-2.91	0
gi|115552101|dbj|AK239294.1|	115552101	AK239294.1	Sus scrofa mRNA, clone:THY010089G10, expressed in thymus		BC008422.1	51187	RSL24D1	ribosomal L24 domain containing 1	0	-0.86	-0.7	-0.75	-1.64	-1.76	-3.21	-2.04	-1.72	-2.07	0
gi|115552108|dbj|AK239301.1|	115552108	AK239301.1	Sus scrofa mRNA, clone:THY010090C06, expressed in thymus		NM_001142279.1	79621	RNASEH2B	ribonuclease H2, subunit B	0	-3.02	-1.65	-3.76	-3.96	-0.61	-9.52	-9.52	-9.52	-9.52	0
gi|115552126|dbj|AK239319.1|	115552126	AK239319.1	Sus scrofa mRNA, clone:THY010092F01, expressed in thymus		BC061637.1	55017	C14orf119	chromosome 14 open reading frame 119	0	-1.04	-0.88	-1.02	-1.46	-0.8	-2.04	-3.39	-4.86	-4.62	0
gi|115552129|dbj|AK239322.1|	115552129	AK239322.1	Sus scrofa mRNA, clone:THY010092G09, expressed in thymus		NM_022770.3	64785	GINS3	GINS complex subunit 3 (Psf3 homolog)	0	1.21	-0.01	-0.66	-0.21	-2.83	-9.42	-9.42	-9.42	-9.42	0
gi|115552139|dbj|AK239332.1|	115552139	AK239332.1	Sus scrofa mRNA, clone:THY010093H09, expressed in thymus		NM_001129887.1	27000	DNAJC2	DnaJ (Hsp40) homolog, subfamily C, member 2	0	0.66	0.62	0.46	0.18	0.01	-0.66	-0.89	-0.38	-0.1	0
gi|115552144|dbj|AK239337.1|	115552144	AK239337.1	Sus scrofa mRNA, clone:THY010094C02, expressed in thymus		AC018690.5	3899	AFF3	AF4/FMR2 family, member 3	0	-1.47	-2.64	-3.23	-2.76	-11.57	-4.89	-5.03	-3.9	-11.57	0
gi|115552153|dbj|AK239346.1|	115552153	AK239346.1	Sus scrofa mRNA, clone:THY010095A05, expressed in thymus		AK290063.1	140739	UBE2F	ubiquitin-conjugating enzyme E2F (putative)	0	-0.05	0.11	0.28	-0.11	0.35	-0.93	-1.33	-1.05	-1.19	0
gi|115552159|dbj|AK239352.1|	115552159	AK239352.1	Sus scrofa mRNA, clone:THY010096A11, expressed in thymus		NM_006099.3	10401	PIAS3	protein inhibitor of activated STAT, 3	0	-1.39	-1.24	-1.29	-2	-3.83	-4.38	-4.44	-3.85	-4.05	0
gi|115552170|dbj|AK230479.1|	115552170	AK230479.1	Sus scrofa mRNA, clone:AMP010001E03, expressed in alveolar macrophage	----	AK291201.1	8546	AP3B1	adaptor-related protein complex 3, beta 1 subunit	0	-0.35	-0.22	-0.56	-0.47	-1.42	-1.42	-1.89	-2.38	-2.07	0
gi|115552175|dbj|AK230484.1|	115552175	AK230484.1	Sus scrofa mRNA, clone:AMP010001H12, expressed in alveolar macrophage	----	NM_006572.4	10672	GNA13	guanine nucleotide binding protein (G protein), alpha 13	0	-0.63	-0.7	-0.65	-0.51	-1.08	-0.44	-0.92	-2.51	-1.94	0
gi|115552181|dbj|AK230490.1|	115552181	AK230490.1	Sus scrofa mRNA, clone:AMP010002E03, expressed in alveolar macrophage	----	NM_016166.1	8554	PIAS1	protein inhibitor of activated STAT, 1	0	0.22	0.44	0.88	0.69	-0.59	-1.72	-2.13	-1.96	-3.19	0
gi|115552187|dbj|AK230496.1|	115552187	AK230496.1	Sus scrofa mRNA, clone:AMP010002G08, expressed in alveolar macrophage	----	AK291337.1	836	CASP3	caspase 3, apoptosis-related cysteine peptidase	0	-0.56	-0.66	-0.88	-1.43	-2.65	-2.93	-4.47	-5.01	-4.87	0
gi|115552191|dbj|AK230500.1|	115552191	AK230500.1	Sus scrofa mRNA, clone:AMP010003E08, expressed in alveolar macrophage	----	NM_014764.3	9802	DAZAP2	DAZ associated protein 2	0	0.44	0.33	0.52	0.31	-0.3	-0.68	-1.6	-1.35	-0.36	0
gi|115552195|dbj|AK230504.1|	115552195	AK230504.1	Sus scrofa mRNA, clone:AMP010003G11, expressed in alveolar macrophage	----	AK302495.1	23019	CNOT1	CCR4-NOT transcription complex, subunit 1	0	-0.17	-0.21	0	-0.41	-1.3	-1.36	-1.34	-1.46	-1.83	0
gi|115552205|dbj|AK230514.1|	115552205	AK230514.1	Sus scrofa mRNA, clone:AMP010005B08, expressed in alveolar macrophage	MYD88	NM_002468.4	4615	MYD88	myeloid differentiation primary response gene (88)	0	-1.11	-0.54	-0.77	-0.55	-2.3	-1.11	-2	-3.25	-3.01	0
gi|115552213|dbj|AK230522.1|	115552213	AK230522.1	Sus scrofa mRNA, clone:AMP010005H10, expressed in alveolar macrophage	FUT8	NM_178154.1	2530	FUT8	fucosyltransferase 8 (alpha (1,6) fucosyltransferase)	0	-1.86	-1.97	-2.22	-1.84	-3.25	-3.15	-4.72	-4.39	-3.59	0
gi|115552215|dbj|AK230524.1|	115552215	AK230524.1	Sus scrofa mRNA, clone:AMP010006B08, expressed in alveolar macrophage	----	NM_004869.3	9525	VPS4B	vacuolar protein sorting 4 homolog B (S. cerevisiae)	0	-2.27	-1.15	-1.22	-2.29	-3.56	-3.14	-2.44	-1.45	-4.78	0
gi|115552220|dbj|AK230529.1|	115552220	AK230529.1	Sus scrofa mRNA, clone:AMP010006E11, expressed in alveolar macrophage	----	FJ380058.1	10006	ABI1	abl-interactor 1	0	-1.24	-0.53	-0.72	-0.64	-0.92	-1.47	-2.24	-5.04	-5.7	0
gi|115552234|dbj|AK230543.1|	115552234	AK230543.1	Sus scrofa mRNA, clone:AMP010008E04, expressed in alveolar macrophage	----	AK298679.1	64581	CLEC7A	C-type lectin domain family 7, member A	0	-1.12	-0.76	-1.76	-1.95	0.56	-9.69	-9.69	-9.69	-9.69	0
gi|115552242|dbj|AK230551.1|	115552242	AK230551.1	Sus scrofa mRNA, clone:AMP010009B06, expressed in alveolar macrophage	----	AK291610.1	8697	CDC23	cell division cycle 23 homolog (S. cerevisiae)	0	-1.61	-1.13	-1.88	-2.22	-2.58	-4.07	-2.96	-5.05	-5.12	0
gi|115552246|dbj|AK230555.1|	115552246	AK230555.1	Sus scrofa mRNA, clone:AMP010009D12, expressed in alveolar macrophage	----	NM_139126.2	85313	PPIL4	peptidylprolyl isomerase (cyclophilin)-like 4	0	-1.91	-1.19	-0.92	-1.34	-1.74	-5.68	-2.93	-4.12	-3.68	0
gi|115552260|dbj|AK230569.1|	115552260	AK230569.1	Sus scrofa mRNA, clone:AMP010010H06, expressed in alveolar macrophage	----	NM_001358.2	1665	DHX15	DEAH (Asp-Glu-Ala-His) box polypeptide 15	0	0.68	0.18	-0.31	-0.62	-1.61	-0.79	-1.88	-2.69	-1.5	0
gi|115552265|dbj|AK230574.1|	115552265	AK230574.1	Sus scrofa mRNA, clone:AMP010011D06, expressed in alveolar macrophage	----	AC087241.11	55500	ETNK1	ethanolamine kinase 1	0	0.45	0.03	-0.33	-0.09	-1.26	-1.93	-2.62	-1.17	-1.87	0
gi|115552269|dbj|AK230578.1|	115552269	AK230578.1	Sus scrofa mRNA, clone:AMP010011E07, expressed in alveolar macrophage	----	NM_001042453.1	51765	RP6-213H19.1	serine/threonine protein kinase MST4	0	-0.04	0.35	0.68	0.18	-2.62	-3.84	-4.37	-4.82	-4.78	0
gi|115552282|dbj|AK230591.1|	115552282	AK230591.1	Sus scrofa mRNA, clone:AMP010013E09, expressed in alveolar macrophage	----	NM_148174.2	51582	AZIN1	antizyme inhibitor 1	0	-0.19	0.46	0.23	0.34	-0.9	-2.19	-1.29	-2.47	-2.61	0
gi|115552285|dbj|AK230594.1|	115552285	AK230594.1	Sus scrofa mRNA, clone:AMP010013H09, expressed in alveolar macrophage	----	BC062618.1	8702	B4GALT4	UDP-Gal:betaGlcNAc beta 1,4- galactosyltransferase, polypeptide 4	0	-3.56	-2.64	-3.3	-2.31	-4.05	-10.05	-10.05	-10.05	-10.05	0
gi|115552286|dbj|AK230595.1|	115552286	AK230595.1	Sus scrofa mRNA, clone:AMP010014B03, expressed in alveolar macrophage	----	BC057826.1	57703	CWC22	CWC22 spliceosome-associated protein homolog (S. cerevisiae)	0	-2.55	-1.85	-2.09	-1.69	-1.84	-2.42	-9.85	-9.85	-9.85	0
gi|115552295|dbj|AK230605.1|	115552295	AK230605.1	Sus scrofa mRNA, clone:AMP010015D09, expressed in alveolar macrophage	LOC100153639	NM_005190.3	892	CCNC	cyclin C	0	0.49	0.1	0.08	0.02	-0.18	-1.1	-1.09	-1.75	-2.93	0
gi|115552300|dbj|AK230610.1|	115552300	AK230610.1	Sus scrofa mRNA, clone:AMP010016F01, expressed in alveolar macrophage	----	NM_002669.2	5356	PLRG1	pleiotropic regulator 1 (PRL1 homolog, Arabidopsis)	0	-0.76	-0.51	-0.7	-0.95	-1.48	-2.12	-3.27	-3.1	-3.17	0
gi|115552307|dbj|AK230617.1|	115552307	AK230617.1	Sus scrofa mRNA, clone:AMP010017E05, expressed in alveolar macrophage	----	NM_016570.2	51290	ERGIC2	ERGIC and golgi 2	0	-0.26	-0.67	-0.67	-0.42	-0.05	-0.52	-0.88	-1.7	-1.76	0
gi|115552309|dbj|AK230619.1|	115552309	AK230619.1	Sus scrofa mRNA, clone:AMP010017F09, expressed in alveolar macrophage	----	AK290654.1	5683	PSMA2	proteasome (prosome, macropain) subunit, alpha type, 2	0	0.34	0.15	-0.14	-0.65	-0.29	-0.62	-1.43	-2.52	-0.62	0
gi|115552310|dbj|AK230620.1|	115552310	AK230620.1	Sus scrofa mRNA, clone:AMP010017F10, expressed in alveolar macrophage	----	NM_032825.3	84911	ZNF382	zinc finger protein 382	0	-0.98	-0.37	-0.42	-0.29	-2.99	-2.3	-3.45	-3.12	-2.4	0
gi|115552311|dbj|AK230621.1|	115552311	AK230621.1	Sus scrofa mRNA, clone:AMP010017G02, expressed in alveolar macrophage	----	NM_024345.3	79269	DCAF10	DDB1 and CUL4 associated factor 10	0	-1.03	-0.7	-1.17	-1.02	-1.58	-0.91	-1.12	-2.31	-1.99	0
gi|115552314|dbj|AK230624.1|	115552314	AK230624.1	Sus scrofa mRNA, clone:AMP010017H04, expressed in alveolar macrophage	----	NG_007370.1	6774	STAT3	signal transducer and activator of transcription 3 (acute-phase response factor)	0	-1.44	-0.49	-0.3	-0.43	-0.42	-1.91	-1.23	-1.3	-2.36	0
gi|115552317|dbj|AK230627.1|	115552317	AK230627.1	Sus scrofa mRNA, clone:AMP010018D04, expressed in alveolar macrophage	----	NM_001130916.1	7046	TGFBR1	transforming growth factor, beta receptor 1	0	-0.34	-0.28	0.04	-0.05	-2.68	-3.27	-2.22	-4.89	-4.49	0
gi|115552353|dbj|AK232758.1|	115552353	AK232758.1	Sus scrofa mRNA, clone:LVRM10020F04, expressed in liver		NM_014282.2	22927	HABP4	hyaluronan binding protein 4	0	-1.24	-0.49	-0.51	-1.12	-0.58	-1.25	-1.69	-1.4	-1.8	0
gi|115552360|dbj|AK232765.1|	115552360	AK232765.1	Sus scrofa mRNA, clone:LVRM10022C09, expressed in liver		NM_212474.1	2335	FN1	fibronectin 1	0	-3.67	-3.32	-9.73	-9.73	-3.15	-9.73	-9.73	-9.73	-9.73	0
gi|115552368|dbj|AK236373.1|	115552368	AK236373.1	Sus scrofa mRNA, clone:OVRM10186C11, expressed in ovary		NM_001128608.1	23005	MAPKBP1	mitogen-activated protein kinase binding protein 1	0	-0.6	-0.8	-1.91	-1.96	-2.81	-3.3	-2.64	-3.32	-2.29	0
gi|115552369|dbj|AK236374.1|	115552369	AK236374.1	Sus scrofa mRNA, clone:OVRM10186D01, expressed in ovary		NM_014669.3	9688	NUP93	nucleoporin 93kDa	0	-0.86	-0.77	-1.16	-1.74	-3.19	-4.01	-3.9	-6	-6.66	0
gi|115552402|dbj|AK236407.1|	115552402	AK236407.1	Sus scrofa mRNA, clone:OVRM10189A11, expressed in ovary		AK295969.1	55129	ANO10	anoctamin 10	0	-2.32	-2.19	-2.21	-3.03	-2.88	-4.95	-4.51	-3.38	-3.09	0
gi|115552411|dbj|AK236416.1|	115552411	AK236416.1	Sus scrofa mRNA, clone:OVRM10189H07, expressed in ovary		NM_001071.2	7298	TYMS	thymidylate synthetase	0	0.81	0.26	0.38	0.02	-3.84	-5.05	-3.17	-5.29	-12.16	0
gi|115552425|dbj|AK236430.1|	115552425	AK236430.1	Sus scrofa mRNA, clone:OVRM10192A05, expressed in ovary		AK291037.1	64327	LMBR1	limb region 1 homolog (mouse)	0	-0.92	-1.17	-1.48	-1.78	-2.1	-2.68	-2.11	-3.43	-4.31	0
gi|115552442|dbj|AK236447.1|	115552442	AK236447.1	Sus scrofa mRNA, clone:OVRM10193D12, expressed in ovary		NM_031476.3	83716	CRISPLD2	cysteine-rich secretory protein LCCL domain containing 2	0	-1.7	-0.69	-0.94	-2.67	-2.02	-2.92	-3.3	-10.83	-4.45	0
gi|115552447|dbj|AK236452.1|	115552447	AK236452.1	Sus scrofa mRNA, clone:OVRM10194B03, expressed in ovary						0	0.14	0.68	0.23	-0.88	-2.88	-3.52	-3.67	-3.02	-4.42	0
gi|115552448|dbj|AK236453.1|	115552448	AK236453.1	Sus scrofa mRNA, clone:OVRM10194E05, expressed in ovary		BC018532.1	116496	FAM129A	family with sequence similarity 129, member A	0	-2.1	-1.77	-1.66	-1.37	-5.09	-4.24	-3.81	-2.9	-4.08	0
gi|115552454|dbj|AK236459.1|	115552454	AK236459.1	Sus scrofa mRNA, clone:OVRM10195D01, expressed in ovary		EU176248.1	23246	BOP1	block of proliferation 1	0	1	0.87	0.62	0.67	0.35	0.03	-0.94	-0.49	-1.77	0
gi|115552466|dbj|AK236471.1|	115552466	AK236471.1	Sus scrofa mRNA, clone:OVRM10196B04, expressed in ovary		NM_022453.2	64320	RNF25	ring finger protein 25	0	0.91	0.71	0.85	0.87	-0.53	0.51	-0.83	-1.31	-2.22	0
gi|115552474|dbj|AK236479.1|	115552474	AK236479.1	Sus scrofa mRNA, clone:OVRM10196G02, expressed in ovary		CR610197.1	84954	MPND	MPN domain containing	0	-0.39	-0.32	0.18	-0.01	-2.44	-2.8	-1.67	-1.51	-1.72	0
gi|115552475|dbj|AK236480.1|	115552475	AK236480.1	Sus scrofa mRNA, clone:OVRM10196G04, expressed in ovary		BT019524.1	2237	FEN1	flap structure-specific endonuclease 1	0	0.36	-0.44	-0.1	-1.04	-3.12	-2.17	-2.91	-1.77	-1.65	0
gi|115552487|dbj|AK236492.1|	115552487	AK236492.1	Sus scrofa mRNA, clone:OVRM10197G04, expressed in ovary		AK293472.1	54971	BANP	BTG3 associated nuclear protein	0	-0.29	-1.29	-0.94	-0.59	-2.21	-3.91	-10.02	-10.02	-10.02	0
gi|115552493|dbj|AK236498.1|	115552493	AK236498.1	Sus scrofa mRNA, clone:OVRM10198H09, expressed in ovary		AK093494.1	151525	WDSUB1	WD repeat, sterile alpha motif and U-box domain containing 1	0	-1.96	-1.21	-1.8	-1.99	-0.89	-2.46	-10.15	-10.15	-10.15	0
gi|115552494|dbj|AK236499.1|	115552494	AK236499.1	Sus scrofa mRNA, clone:OVRM10198B09, expressed in ovary		AK312738.1	6574	SLC20A1	solute carrier family 20 (phosphate transporter), member 1	0	-1.98	-1.72	-2	-2.74	-2.89	-2.21	-3.1	-11.22	-11.22	0
gi|115552521|dbj|AK236526.1|	115552521	AK236526.1	Sus scrofa mRNA, clone:OVRM10200B08, expressed in ovary		NM_138389.1	92689	FAM114A1	family with sequence similarity 114, member A1	0	-3.5	-4.17	-3.81	-9.56	-3.56	-9.56	-9.56	-9.56	-9.56	0
gi|115552532|dbj|AK236537.1|	115552532	AK236537.1	Sus scrofa mRNA, clone:OVRM10201A11, expressed in ovary		BC172232.1	1063	CENPF	centromere protein F, 350/400ka (mitosin)	0	-0.69	-1.47	-1.61	-2.03	-12.09	-12.09	-12.09	-12.09	-12.09	0
gi|115552610|dbj|AK232815.1|	115552610	AK232815.1	Sus scrofa mRNA, clone:LVRM10031B03, expressed in liver		NM_018097.2	55142	HAUS2	HAUS augmin-like complex, subunit 2	0	-0.79	-0.11	-0.3	-0.38	-1.03	-2.17	-2.39	-2.54	-2.04	0
gi|115552643|dbj|AK232848.1|	115552643	AK232848.1	Sus scrofa mRNA, clone:LVRM10038C10, expressed in liver						0	1.2	1.28	1.33	-0.06	0.33	-0.46	-2.1	-1.09	-2.17	0
gi|115552725|dbj|AK232930.1|	115552725	AK232930.1	Sus scrofa mRNA, clone:LVRM10052B08, expressed in liver		NM_001113402.1	196394	AMN1	antagonist of mitotic exit network 1 homolog (S. cerevisiae)	0	-1.31	-1.06	-1.34	-1.71	-1.53	-1.93	-2.15	-2.46	-2.9	0
gi|115552765|dbj|AK239358.1|	115552765	AK239358.1	Sus scrofa mRNA, clone:THY010096C12, expressed in thymus		AK299212.1	10806	SDCCAG8	serologically defined colon cancer antigen 8	0	-0.17	-0.82	-1.16	-0.99	-1.17	-1.17	-2.97	-1.63	-2.3	0
gi|115552766|dbj|AK239359.1|	115552766	AK239359.1	Sus scrofa mRNA, clone:THY010096D11, expressed in thymus		NM_005334.2	3054	HCFC1	host cell factor C1 (VP16-accessory protein)	0	-1.44	-0.91	-1.45	-1.91	-1.69	-2.36	-2.28	-1.54	-1.88	0
gi|115552788|dbj|AK239381.1|	115552788	AK239381.1	Sus scrofa mRNA, clone:THY010098D08, expressed in thymus		NM_020728.2	57488	ESYT2	extended synaptotagmin-like protein 2	0	0.24	0.72	0.88	0.33	-0.77	-0.98	-1.36	-2.47	-1.45	0
gi|115552832|dbj|AK239426.1|	115552832	AK239426.1	Sus scrofa mRNA, clone:THY010102H01, expressed in thymus		NR_027302.1	7507	XPA	xeroderma pigmentosum, complementation group A	0	0.96	0.3	-0.71	0.94	-0.74	-1.72	-1.64	-2.54	-2.88	0
gi|115552858|dbj|AK239452.1|	115552858	AK239452.1	Sus scrofa mRNA, clone:THY010104H03, expressed in thymus		NM_005028.4	5305	PIP4K2A	phosphatidylinositol-5-phosphate 4-kinase, type II, alpha	0	0.86	0.19	-0.09	-0.09	-2.05	-1.43	-1.61	-11.05	-11.05	0
gi|115552879|dbj|AK239473.1|	115552879	AK239473.1	Sus scrofa mRNA, clone:THY010106E02, expressed in thymus		NM_001165931.1	6241	RRM2	ribonucleotide reductase M2	0	-0.42	-1.05	-1.04	-1.71	-4.48	-5.11	-3.94	-11.8	-11.8	0
gi|115552903|dbj|AK239497.1|	115552903	AK239497.1	Sus scrofa mRNA, clone:THY010108A04, expressed in thymus		NM_003017.4	6428	SFRS3	splicing factor, arginine/serine-rich 3	0	-0.16	-0.44	-0.66	-0.88	-1.14	-2.03	-2.37	-1.71	-1.55	0
gi|115552949|dbj|AK239543.1|	115552949	AK239543.1	Sus scrofa mRNA, clone:THY010111H05, expressed in thymus		BC137491.1	79893	GGNBP2	gametogenetin binding protein 2	0	-1.75	-1.2	-1.54	-1.87	-1.29	-2.13	-2.16	-10.69	-10.69	0
gi|115552953|dbj|AK239547.1|	115552953	AK239547.1	Sus scrofa mRNA, clone:THY010112B04, expressed in thymus		NM_001112707.1	11011	TLK2	tousled-like kinase 2	0	-1.51	-1.15	-1.03	-0.95	-1.04	-2	-1.45	-2.66	-4.91	0
gi|115552967|dbj|AK239553.1|	115552967	AK239553.1	Sus scrofa mRNA, clone:THY010112C05, expressed in thymus		NM_016162.3	51147	ING4	inhibitor of growth family, member 4	0	-1.96	-0.97	-0.8	-1.03	-1.68	-0.97	-2.07	-4.91	-4.99	0
gi|115552971|dbj|AK239557.1|	115552971	AK239557.1	Sus scrofa mRNA, clone:THY010112D06, expressed in thymus		NM_000249.3	4292	MLH1	mutL homolog 1, colon cancer, nonpolyposis type 2 (E. coli)	0	-0.92	-0.67	-1.35	-0.91	-3.23	-2.67	-2.89	-2.37	-1.92	0
gi|115553001|dbj|AK239587.1|	115553001	AK239587.1	Sus scrofa mRNA, clone:THY010114D10, expressed in thymus		NM_002861.2	5833	PCYT2	phosphate cytidylyltransferase 2, ethanolamine	0	0.71	0.48	0.38	0.4	-0.25	-0.17	-1.2	-1.36	-1.24	0
gi|115553034|dbj|AK239620.1|	115553034	AK239620.1	Sus scrofa mRNA, clone:THY010117A02, expressed in thymus		NM_015338.5	171023	ASXL1	additional sex combs like 1 (Drosophila)	0	-0.28	-0.39	-0.27	-0.31	-2.1	-2.59	-2.78	-4.98	-3.83	0
gi|115553045|dbj|AK239631.1|	115553045	AK239631.1	Sus scrofa mRNA, clone:THY010117G07, expressed in thymus		NM_006468.6	10623	POLR3C	polymerase (RNA) III (DNA directed) polypeptide C (62kD)	0	0.04	0.06	-0.22	-0.43	-0.59	-0.61	-0.89	-2.11	-1.85	0
gi|115553071|dbj|AK239657.1|	115553071	AK239657.1	Sus scrofa mRNA, clone:THY010120C07, expressed in thymus		DQ895152.2	23765	IL17RA	interleukin 17 receptor A	0	-0.18	-0.44	-0.64	-1.02	-1.62	-2.4	-2.09	-2.43	-1.13	0
gi|115553080|dbj|AK239666.1|	115553080	AK239666.1	Sus scrofa mRNA, clone:THY010120G10, expressed in thymus		AB209921.1	4125	MAN2B1	mannosidase, alpha, class 2B, member 1	0	-0.49	-0.43	-0.46	-0.77	-1.94	-2.34	-2.67	-1.27	-2.09	0
gi|115553090|dbj|AK239676.1|	115553090	AK239676.1	Sus scrofa mRNA, clone:THY010123D03, expressed in thymus		NM_015659.2	26156	RSL1D1	ribosomal L1 domain containing 1	0	-0.3	-0.54	-0.24	-0.33	-0.21	-1.26	-1.61	-1.12	-1.31	0
gi|115553091|dbj|AK239677.1|	115553091	AK239677.1	Sus scrofa mRNA, clone:THY010123D04, expressed in thymus		NM_016003.3	26100	WIPI2	WD repeat domain, phosphoinositide interacting 2	0	-0.43	-0.21	-0.02	-0.07	-0.87	-1.51	-1.71	-2.01	-2.35	0
gi|115553097|dbj|AK239683.1|	115553097	AK239683.1	Sus scrofa mRNA, clone:THY010123G11, expressed in thymus		GQ919058.1	6510	SLC1A5	solute carrier family 1 (neutral amino acid transporter), member 5	0	-0.79	-0.33	-0.4	-0.82	-0.98	-2.85	-2.55	-3.96	-3.3	0
gi|115553103|dbj|AK239689.1|	115553103	AK239689.1	Sus scrofa mRNA, clone:THY010124A10, expressed in thymus		NM_002812.4	5714	PSMD8	proteasome (prosome, macropain) 26S subunit, non-ATPase, 8	0	0.22	0.25	0.19	-0.04	-0.51	-0.71	-0.77	-0.02	-0.74	0
gi|115553109|dbj|AK239695.1|	115553109	AK239695.1	Sus scrofa mRNA, clone:THY010124D05, expressed in thymus		NM_006224.3	5306	PITPNA	phosphatidylinositol transfer protein, alpha	0	0.17	0.04	0.2	-0.12	-1.24	-0.46	-0.82	-2.14	-2.31	0
gi|115553121|dbj|AK239707.1|	115553121	AK239707.1	Sus scrofa mRNA, clone:THY010124H07, expressed in thymus		AP001160.4	374395	TMEM179B	transmembrane protein 179B	0	1.43	0.75	0.57	1.02	-0.28	-0.89	-2.24	-4.08	-4.57	0
gi|115553124|dbj|AK239710.1|	115553124	AK239710.1	Sus scrofa mRNA, clone:THY010125A09, expressed in thymus		NM_002766.2	5635	PRPSAP1	phosphoribosyl pyrophosphate synthetase-associated protein 1	0	-0.25	-0.15	0.1	-0.45	-0.77	-0.83	-1.9	-2.16	-3.23	0
gi|115553127|dbj|AK239713.1|	115553127	AK239713.1	Sus scrofa mRNA, clone:THY010125D01, expressed in thymus		CR609131.1	54930	HAUS4	HAUS augmin-like complex, subunit 4	0	-0.05	0.06	-1.2	-0.94	-2.61	-3.1	-3.67	-10.21	-10.21	0
gi|115553137|dbj|AK239723.1|	115553137	AK239723.1	Sus scrofa mRNA, clone:THY010126A08, expressed in thymus		AK295995.1	10409	BASP1	brain abundant, membrane attached signal protein 1	0	-4.68	-3.72	-4.74	-5.97	-7.3	-8.52	-7.09	-8.77	-14.62	0
gi|115553141|dbj|AK239727.1|	115553141	AK239727.1	Sus scrofa mRNA, clone:THY010126B07, expressed in thymus		NM_001497.3	2683	B4GALT1	UDP-Gal:betaGlcNAc beta 1,4- galactosyltransferase, polypeptide 1	0	-0.58	-0.8	-0.57	-1.03	-2.26	-2	-3.66	-4.98	-3.62	0
gi|115553146|dbj|AK239732.1|	115553146	AK239732.1	Sus scrofa mRNA, clone:THY010126D09, expressed in thymus		NM_080732.2	112398	EGLN2	egl nine homolog 2 (C. elegans)	0	-2.57	-2.64	-2.29	-2.68	-2.05	-1.63	-3.51	-10.05	-10.05	0
gi|115553166|dbj|AK232966.1|	115553166	AK232966.1	Sus scrofa mRNA, clone:LVRM10056H08, expressed in liver		NM_001283.3	1174	AP1S1	adaptor-related protein complex 1, sigma 1 subunit	0	0.27	0.16	0.07	-0.31	-1.04	-1.26	-1.25	-0.92	-2.73	0
gi|115553207|dbj|AK233005.1|	115553207	AK233005.1	Sus scrofa mRNA, clone:LVRM10066G07, expressed in liver		NM_017825.2	54936	ADPRHL2	ADP-ribosylhydrolase like 2	0	-0.3	-0.39	-0.33	-0.89	-0.42	-1.28	-4.31	-2.81	-10.85	0
gi|115553218|dbj|AK233016.1|	115553218	AK233016.1	Sus scrofa mRNA, clone:LVRM10069G01, expressed in liver		BC000040.2	57418	WDR18	WD repeat domain 18	0	-0.52	-0.55	-0.38	-1.35	-1.17	-1.55	-2.33	-1.05	-0.97	0
gi|115553231|dbj|AK233029.1|	115553231	AK233029.1	Sus scrofa mRNA, clone:LVRM10070G04, expressed in liver		NM_005080.3	7494	XBP1	X-box binding protein 1	0	-0.83	-0.96	-0.91	-1.29	-1.15	-2.39	-1.91	-1.9	-2.47	0
gi|115553335|dbj|AK233133.1|	115553335	AK233133.1	Sus scrofa mRNA, clone:LVRM10087B11, expressed in liver		AK290935.1	7108	TM7SF2	transmembrane 7 superfamily member 2	0	-1.55	-1.85	-1.63	-1.96	-2.25	-2.74	-9.85	-9.85	-9.85	0
gi|115553356|dbj|AK233154.1|	115553356	AK233154.1	Sus scrofa mRNA, clone:LVRM10091C03, expressed in liver						0	-0.85	-0.02	-0.03	-0.49	0.73	-3.81	-3.38	-1.89	-3.54	0
gi|115553364|dbj|AK233162.1|	115553364	AK233162.1	Sus scrofa mRNA, clone:LVRM10093B08, expressed in liver		NG_013248.1	28986	MAGEH1	melanoma antigen family H, 1	0	0.63	0.33	0.03	0.09	-2.09	-1.74	-2.41	-2.28	-3.74	0
gi|115553370|dbj|AK236573.1|	115553370	AK236573.1	Sus scrofa mRNA, clone:OVRM10205B10, expressed in ovary		AB371586.1	6711	SPTBN1	spectrin, beta, non-erythrocytic 1	0	-1.89	-1.38	-1.07	-1.33	-1.04	-1.38	-2.86	-6.04	-6.71	0
gi|115553373|dbj|AK236576.1|	115553373	AK236576.1	Sus scrofa mRNA, clone:OVRM10205E08, expressed in ovary		BC011754.2	9601	PDIA4	protein disulfide isomerase family A, member 4	0	0.29	-0.34	-0.16	-0.91	-1.36	-2.07	-2.52	-2.83	-1.61	0
gi|115553375|dbj|AK236578.1|	115553375	AK236578.1	Sus scrofa mRNA, clone:OVRM10205F11, expressed in ovary		NM_005188.2	867	CBL	Cas-Br-M (murine) ecotropic retroviral transforming sequence	0	-1.14	-0.98	-0.59	-0.67	-1.86	-10.67	-4.13	-3	-10.67	0
gi|115553398|dbj|AK236601.1|	115553398	AK236601.1	Sus scrofa mRNA, clone:OVRM10207C01, expressed in ovary		AK292102.1	11015	KDELR3	KDEL (Lys-Asp-Glu-Leu) endoplasmic reticulum protein retention receptor 3	0	1.08	1.14	0.48	0.28	-1.35	-2.13	-10.94	-5.08	-4.14	0
gi|115553417|dbj|AK236620.1|	115553417	AK236620.1	Sus scrofa mRNA, clone:OVRM10208H03, expressed in ovary		NM_001160708.1	55703	POLR3B	polymerase (RNA) III (DNA directed) polypeptide B	0	-1.29	-1.19	-1.84	-1.51	-1.08	-1.88	-2.13	-3.54	-4.61	0
gi|115553419|dbj|AK236622.1|	115553419	AK236622.1	Sus scrofa mRNA, clone:OVRM10208H11, expressed in ovary		BC003148.1	27238	GPKOW	G patch domain and KOW motifs	0	-0.5	-0.06	-0.04	-0.12	-0.02	-1.43	-3	-1.79	-2.52	0
gi|115553424|dbj|AK236627.1|	115553424	AK236627.1	Sus scrofa mRNA, clone:OVRM10209D05, expressed in ovary		NM_015352.1	23509	POFUT1	protein O-fucosyltransferase 1	0	-0.19	0.54	0.58	0.26	-1.26	-9.26	-9.26	-9.26	-9.26	0
gi|115553440|dbj|AK236643.1|	115553440	AK236643.1	Sus scrofa mRNA, clone:OVRM10210G05, expressed in ovary		AK291984.1	285148	IAH1	isoamyl acetate-hydrolyzing esterase 1 homolog (S. cerevisiae)	0	0.04	0.23	0.26	0.11	-0.45	-0.64	-0.87	-0.36	-1.25	0
gi|115553445|dbj|AK236648.1|	115553445	AK236648.1	Sus scrofa mRNA, clone:OVRM10211E06, expressed in ovary		AK294964.1	7159	TP53BP2	tumor protein p53 binding protein, 2	0	-1.04	-1.11	-1.55	-0.95	-3.77	-1.35	-2.65	-9.77	-9.77	0
gi|115553452|dbj|AK236655.1|	115553452	AK236655.1	Sus scrofa mRNA, clone:OVRM10212D03, expressed in ovary		AK294163.1	526	ATP6V1B2	ATPase, H+ transporting, lysosomal 56/58kDa, V1 subunit B2	0	-0.9	-0.65	-0.59	-0.46	-0.76	-2.14	-1.81	-3.59	-4.14	0
gi|115553457|dbj|AK236660.1|	115553457	AK236660.1	Sus scrofa mRNA, clone:OVRM10213A06, expressed in ovary		NM_001894.4	1454	CSNK1E	casein kinase 1, epsilon	0	-0.59	-0.4	-0.18	-0.43	-0.57	-0.94	-1.36	-1.8	-2.63	0
gi|115553478|dbj|AK236681.1|	115553478	AK236681.1	Sus scrofa mRNA, clone:OVRM10214F07, expressed in ovary		AC009054.8	10428	CFDP1	craniofacial development protein 1	0	-0.74	-0.29	-0.29	-0.96	-1.47	-1.15	-0.56	-2.82	-2.72	0
gi|115553485|dbj|AK236688.1|	115553485	AK236688.1	Sus scrofa mRNA, clone:OVRM10215E09, expressed in ovary		NM_001040441.1	653121	ZBTB8A	zinc finger and BTB domain containing 8A	0	-2.46	-1.62	-2.19	-2.23	-2.52	-10.12	-10.12	-10.12	-10.12	0
gi|115553496|dbj|AK236699.1|	115553496	AK236699.1	Sus scrofa mRNA, clone:OVRM10217E11, expressed in ovary	FSCN1	NM_003088.2	6624	FSCN1	fascin homolog 1, actin-bundling protein (Strongylocentrotus purpuratus)	0	-2.84	-2.33	-2.03	-1.98	-5.16	-6.05	-13.16	-13.16	-13.16	0
gi|115553497|dbj|AK236700.1|	115553497	AK236700.1	Sus scrofa mRNA, clone:OVRM10217G08, expressed in ovary		NM_007270.3	11328	FKBP9	FK506 binding protein 9, 63 kDa	0	0.05	0.34	0.05	0.01	-2.23	-3.14	-3.16	-7.16	-6.61	0
gi|115553504|dbj|AK236707.1|	115553504	AK236707.1	Sus scrofa mRNA, clone:OVRM10218D09, expressed in ovary		NM_001079524.1	10606	PAICS	phosphoribosylaminoimidazole carboxylase, phosphoribosylaminoimidazole succinocarboxamide synthetase	0	-1.12	-1.27	-1.78	-2.69	-3.77	-3.16	-3.73	-4.13	-3.99	0
gi|115553516|dbj|AK236719.1|	115553516	AK236719.1	Sus scrofa mRNA, clone:OVRM10220C01, expressed in ovary		AC006064.10	100127974	LOC100127974	hypothetical protein LOC100127974	0	-0.56	-0.42	-0.22	-0.51	-1.92	-2.47	-2.12	-1.36	-2.7	0
gi|115553521|dbj|AK236724.1|	115553521	AK236724.1	Sus scrofa mRNA, clone:OVRM10220G09, expressed in ovary		NM_003310.2	7260	TSSC1	tumor suppressing subtransferable candidate 1	0	0.02	-0.31	-0.27	-0.8	-0.39	-1.65	-1.16	-2.02	-1.13	0
gi|115553541|dbj|AK236744.1|	115553541	AK236744.1	Sus scrofa mRNA, clone:OVRM10223F11, expressed in ovary		AK225203.1	51111	SUV420H1	suppressor of variegation 4-20 homolog 1 (Drosophila)	0	0.63	0.64	1.4	0.49	-0.7	-1.69	-0.9	-1.93	-3.82	0
gi|115553567|dbj|AK239754.1|	115553567	AK239754.1	Sus scrofa mRNA, clone:THY010202E10, expressed in thymus		AK290746.1	64946	CENPH	centromere protein H	0	-0.21	-0.42	-1.04	-1.69	-3.85	-10.85	-10.85	-10.85	-4.47	0
gi|115553596|dbj|AK239783.1|	115553596	AK239783.1	Sus scrofa mRNA, clone:THY010204C08, expressed in thymus		GQ129389.1	7374	UNG	uracil-DNA glycosylase	0	0.47	-0.02	-0.5	-0.26	-1.91	-2.13	-2	-4.79	-4.86	0
gi|115553618|dbj|AK239805.1|	115553618	AK239805.1	Sus scrofa mRNA, clone:THY010206D12, expressed in thymus		NM_198395.1	10146	G3BP1	GTPase activating protein (SH3 domain) binding protein 1	0	-2.56	-3.37	-3.03	-1.8	-1.04	-3.26	-9.37	-3.51	-9.37	0
gi|115553632|dbj|AK239819.1|	115553632	AK239819.1	Sus scrofa mRNA, clone:THY010207E11, expressed in thymus		NM_014077.2	26017	FAM32A	family with sequence similarity 32, member A	0	0.12	0.15	0.06	0.06	-1.05	-1.2	-1.68	-0.45	-0.62	0
gi|115553671|dbj|AK239858.1|	115553671	AK239858.1	Sus scrofa mRNA, clone:UTR010005E09, expressed in uterus		NM_001122898.1	4267	CD99	CD99 molecule	0	0.73	1.02	1.01	0.76	-0.54	-0.85	-1.62	-2.5	-2.75	0
gi|115553703|dbj|AK239890.1|	115553703	AK239890.1	Sus scrofa mRNA, clone:UTR010008C03, expressed in uterus		NM_014230.2	6730	SRP68	signal recognition particle 68kDa	0	0.09	0.09	0.1	0.25	-0.05	-0.18	-0.75	-1.45	-1.03	0
gi|115553705|dbj|AK239892.1|	115553705	AK239892.1	Sus scrofa mRNA, clone:UTR010008D10, expressed in uterus		NM_017994.4	55069	C7orf42	chromosome 7 open reading frame 42	0	0.14	0.26	0.34	-0.27	-1.36	-1.2	-2.01	-1.75	-1.13	0
gi|115553726|dbj|AK239913.1|	115553726	AK239913.1	Sus scrofa mRNA, clone:UTR010010F04, expressed in uterus		NG_008962.1	5741	PTH	parathyroid hormone	0	-1.99	-1.84	-2.27	-1.95	-1.3	-2.06	-2.81	-5.33	-5.72	0
gi|115553767|dbj|AK236772.1|	115553767	AK236772.1	Sus scrofa mRNA, clone:PBL010002G03, expressed in periphral blood mononuclear cell		AF070671.1	25816	TNFAIP8	tumor necrosis factor, alpha-induced protein 8	0	-0.08	0.27	-0.41	-0.6	-2.73	-2.87	-4.31	-4.99	-4.64	0
gi|115553807|dbj|AK236812.1|	115553807	AK236812.1	Sus scrofa mRNA, clone:PBL010010H02, expressed in periphral blood mononuclear cell		BC007424.2	9128	PRPF4	PRP4 pre-mRNA processing factor 4 homolog (yeast)	0	-0.48	-0.7	-0.95	-1.06	-1.63	-1.53	-3	-5.68	-3.95	0
gi|115553811|dbj|AK236816.1|	115553811	AK236816.1	Sus scrofa mRNA, clone:PBL010011F05, expressed in periphral blood mononuclear cell		NM_021813.2	60468	BACH2	BTB and CNC homology 1, basic leucine zipper transcription factor 2	0	-1.97	-1.16	-1.19	-1.23	-2.45	-3.51	-4.25	-4.59	-4.67	0
gi|115553874|dbj|AK236879.1|	115553874	AK236879.1	Sus scrofa mRNA, clone:PBL010031D11, expressed in periphral blood mononuclear cell		AP001591.5	11145	PLA2G16	phospholipase A2, group XVI	0	0.33	0.34	0.51	0.34	-1.21	-2.03	-2.52	-0.96	-1.51	0
gi|115553907|dbj|AK236912.1|	115553907	AK236912.1	Sus scrofa mRNA, clone:PBL010040F04, expressed in periphral blood mononuclear cell		AK301984.1	55287	TMEM40	transmembrane protein 40	0	1.08	1.93	2.14	1.7	-2.26	-8.26	-8.26	-8.26	-8.26	0
gi|115554023|dbj|AK233232.1|	115554023	AK233232.1	Sus scrofa mRNA, clone:LVRM10108B05, expressed in liver		AC011500.7	92609	TIMM50	translocase of inner mitochondrial membrane 50 homolog (S. cerevisiae)	0	0.22	0.04	-0.13	-0.17	-0.78	-2.58	-9.69	-3.83	-9.69	0
gi|115554027|dbj|AK233236.1|	115554027	AK233236.1	Sus scrofa mRNA, clone:LVRM10108D04, expressed in liver		AL833483.1	2035	EPB41	erythrocyte membrane protein band 4.1 (elliptocytosis 1, RH-linked)	0	-0.83	-0.72	-0.99	-1.24	-1.65	-1.31	-0.94	-1.48	-2.11	0
gi|115554063|dbj|AK233272.1|	115554063	AK233272.1	Sus scrofa mRNA, clone:LVRM10115C04, expressed in liver		AF265215.1	55905	RNF114	ring finger protein 114	0	-2.26	-1.9	-2.38	-2.32	-2.14	-3.04	-3.28	-12.14	-12.14	0
gi|115554075|dbj|AK233284.1|	115554075	AK233284.1	Sus scrofa mRNA, clone:LVRM10116G05, expressed in liver		NM_001032293.2	7756	ZNF207	zinc finger protein 207	0	-0.59	-1.19	-1.56	-1.5	-2.44	-1.8	-2.67	-2.4	-1.51	0
gi|115554129|dbj|AK233339.1|	115554129	AK233339.1	Sus scrofa mRNA, clone:LVRM10124H07, expressed in liver		AC009716.22	9658	ZNF516	zinc finger protein 516	0	-1.79	-1.79	-1.83	-2.13	-2.52	-3.26	-2.68	-2.29	-2.43	0
gi|115554132|dbj|AK233342.1|	115554132	AK233342.1	Sus scrofa mRNA, clone:LVRM10125B06, expressed in liver		L42300.1	6539	SLC6A12	solute carrier family 6 (neurotransmitter transporter, betaine/GABA), member 12	0	1.51	1.72	4.07	4.59	0.85	-6.15	-6.15	-6.15	-6.15	0
gi|115554133|dbj|AK233343.1|	115554133	AK233343.1	Sus scrofa mRNA, clone:LVRM10125C01, expressed in liver		AK292758.1	8241	RBM10	RNA binding motif protein 10	0	0.13	0.08	0.13	0.37	-0.22	-0.54	-1.36	-3.03	-2.08	0
gi|115554167|dbj|AK239962.1|	115554167	AK239962.1	Sus scrofa mRNA, clone:UTR010016B04, expressed in uterus		BC103755.1	117581	TWIST2	twist homolog 2 (Drosophila)	0	-3.06	-3.06	-3.71	-3.64	-4.47	-11.79	-11.79	-11.79	-11.79	0
gi|115554174|dbj|AK239969.1|	115554174	AK239969.1	Sus scrofa mRNA, clone:UTR010016G07, expressed in uterus		NM_017849.1	55654	TMEM127	transmembrane protein 127	0	-1.5	-0.62	-1.06	-1.52	-1.05	-1.35	-2.87	-4.96	-3.62	0
gi|115554214|dbj|AK240009.1|	115554214	AK240009.1	Sus scrofa mRNA, clone:UTR010021C03, expressed in uterus		BC007275.1	56926	NCLN	nicalin homolog (zebrafish)	0	-1.23	-1.15	-1.02	-1.88	-1.11	-1.78	-2.21	-3.17	-3.25	0
gi|115554223|dbj|AK240018.1|	115554223	AK240018.1	Sus scrofa mRNA, clone:UTR010021F06, expressed in uterus		NM_017765.2	54896	PQLC2	PQ loop repeat containing 2	0	-0.14	0.01	0.22	-0.62	-0.53	-3.13	-2.12	-1.12	-1.99	0
gi|115554227|dbj|AK240022.1|	115554227	AK240022.1	Sus scrofa mRNA, clone:UTR010022A12, expressed in uterus		NM_016183.3	51154	MRTO4	mRNA turnover 4 homolog (S. cerevisiae)	0	0.25	0.23	0.03	0.04	0.59	-1.41	-2.06	-3.07	-2.8	0
gi|115554261|dbj|AK240056.1|	115554261	AK240056.1	Sus scrofa mRNA, clone:UTR010025H12, expressed in uterus		BC000250.1	4832	NME3	non-metastatic cells 3, protein expressed in	0	0.66	0.72	0.77	0.31	-1.49	-0.93	-1.79	-3.62	-2.38	0
gi|115554282|dbj|AK240077.1|	115554282	AK240077.1	Sus scrofa mRNA, clone:UTR010028E04, expressed in uterus		NM_006937.3	6613	SUMO2	SMT3 suppressor of mif two 3 homolog 2 (S. cerevisiae)	0	0.02	-0.13	-0.41	-0.4	-1.93	-1.97	-1.87	-2.01	-2.08	0
gi|115554284|dbj|AK240079.1|	115554284	AK240079.1	Sus scrofa mRNA, clone:UTR010028G02, expressed in uterus		NM_002609.3	5159	PDGFRB	platelet-derived growth factor receptor, beta polypeptide	0	-1.12	-0.31	0.11	-0.12	-1.12	-2.29	-2.32	-3.08	-6.08	0
gi|115554295|dbj|AK240090.1|	115554295	AK240090.1	Sus scrofa mRNA, clone:UTR010029H10, expressed in uterus		NM_152734.3	221477	C6orf89	chromosome 6 open reading frame 89	0	0.61	0.26	0.51	0.03	-1.14	-3.68	-3.26	-2.6	-2.54	0
gi|115554299|dbj|AK240094.1|	115554299	AK240094.1	Sus scrofa mRNA, clone:UTR010030B10, expressed in uterus		AY037165.1	81888	HYI	hydroxypyruvate isomerase homolog (E. coli)	0	0.67	0.71	1	0.64	-2.55	-2.47	-3.28	-7.6	-3.97	0
gi|115554300|dbj|AK240095.1|	115554300	AK240095.1	Sus scrofa mRNA, clone:UTR010030C12, expressed in uterus		BC032228.1	4926	NUMA1	nuclear mitotic apparatus protein 1	0	-0.59	-0.31	0.58	-0.85	-0.88	-8.88	-2.34	-8.88	-3.1	0
gi|115554351|dbj|AK240146.1|	115554351	AK240146.1	Sus scrofa mRNA, clone:UTR010035C06, expressed in uterus	CXCL12	NM_199168.2	6387	CXCL12	chemokine (C-X-C motif) ligand 12 (stromal cell-derived factor 1)	0	-1.03	-1.16	-1.04	-1.22	-2.44	-2.49	-1.91	-6.95	-4.84	0
gi|115554352|dbj|AK240147.1|	115554352	AK240147.1	Sus scrofa mRNA, clone:UTR010035D01, expressed in uterus		NM_012288.3	9697	TRAM2	translocation associated membrane protein 2	0	-0.23	-0.38	-1.15	-0.84	-2.17	-2.58	-3.95	-2.17	-3.38	0
gi|115554358|dbj|AK233368.1|	115554358	AK233368.1	Sus scrofa mRNA, clone:LVRM10131B08, expressed in liver		AK304787.1	4673	NAP1L1	nucleosome assembly protein 1-like 1	0	0.17	-0.47	-0.54	-0.81	-1.55	-1.44	-1.61	-6.04	-3.91	0
gi|115554363|dbj|AK233373.1|	115554363	AK233373.1	Sus scrofa mRNA, clone:LVRM10133E09, expressed in liver		BC031265.1	23554	TSPAN12	tetraspanin 12	0	0.27	0.73	0.87	0.42	-1.82	-2.78	-2.53	-3.2	-3.65	0
gi|115554371|dbj|AK233381.1|	115554371	AK233381.1	Sus scrofa mRNA, clone:LVRM10136A05, expressed in liver		CR608854.1	7070	THY1	Thy-1 cell surface antigen	0	-1.64	-1.4	-1.28	-2.18	-3.02	-4.51	-2.91	-3.14	-3.39	0
gi|115554372|dbj|AK233382.1|	115554372	AK233382.1	Sus scrofa mRNA, clone:LVRM10136B04, expressed in liver		CR594689.1	7884	SLBP	stem-loop binding protein	0	0.77	0.35	-0.21	-0.3	-3.03	-3.01	-3.12	-3.32	-2.71	0
gi|115554376|dbj|AK233386.1|	115554376	AK233386.1	Sus scrofa mRNA, clone:LVRM10136D01, expressed in liver		NM_004487.3	2804	GOLGB1	golgin B1	0	-0.78	-0.49	-0.42	-1.99	-1.93	-3.08	-2.54	-3.85	-3.1	0
gi|115554415|dbj|AK233425.1|	115554415	AK233425.1	Sus scrofa mRNA, clone:LVRM10145F11, expressed in liver		NM_018241.2	55751	TMEM184C	transmembrane protein 184C	0	-1.09	-1.23	-1.46	-1.26	-1.11	-1.85	-2.76	-1.61	-4.04	0
gi|115554417|dbj|AK233427.1|	115554417	AK233427.1	Sus scrofa mRNA, clone:LVRM10145G12, expressed in liver		BK001681.1	10313	RTN3	reticulon 3	0	0.63	0.18	0.42	-0.01	-0.35	-0.87	-0.63	-1.46	-1.86	0
gi|115554422|dbj|AK233432.1|	115554422	AK233432.1	Sus scrofa mRNA, clone:LVRM10147F04, expressed in liver		NG_008069.1	23095	KIF1B	kinesin family member 1B	0	1.63	2.61	2.52	2.92	1.45	0.13	-6.55	-6.55	-6.55	0
gi|115554452|dbj|AK233462.1|	115554452	AK233462.1	Sus scrofa mRNA, clone:LVRM10152C10, expressed in liver		BC009545.1	9638	FEZ1	fasciculation and elongation protein zeta 1 (zygin I)	0	-4.17	-4.07	-11.65	-6.09	-4.33	-11.65	-11.65	-11.65	-11.65	0
gi|115554487|dbj|AK233497.1|	115554487	AK233497.1	Sus scrofa mRNA, clone:LVRM10159A10, expressed in liver		NM_015168.1	23211	ZC3H4	zinc finger CCCH-type containing 4	0	-0.77	-0.66	-0.43	-0.86	-1.3	-1.53	-1.38	-2.84	-3.37	0
gi|115554489|dbj|AK233499.1|	115554489	AK233499.1	Sus scrofa mRNA, clone:LVRM10159H01, expressed in liver		NM_022484.4	64418	TMEM168	transmembrane protein 168	0	-0.28	0.17	0.21	-0.62	-1.18	-1.31	-2.04	-2.71	-4.17	0
gi|115554492|dbj|AK233502.1|	115554492	AK233502.1	Sus scrofa mRNA, clone:LVRM10160D07, expressed in liver		AJ271337.1	10732	TCFL5	transcription factor-like 5 (basic helix-loop-helix)	0	-1.52	-1.66	-1.93	-2.07	-4.68	-2.54	-3.38	-4.05	-3.19	0
gi|115554540|dbj|AK233550.1|	115554540	AK233550.1	Sus scrofa mRNA, clone:LVRM10170F01, expressed in liver		NM_020470.2	10897	YIF1A	Yip1 interacting factor homolog A (S. cerevisiae)	0	-0.98	-0.47	-1.02	-0.59	-0.19	-1.01	-1.64	-1.56	-1.68	0
gi|115554560|dbj|AK236970.1|	115554560	AK236970.1	Sus scrofa mRNA, clone:PBL010060E07, expressed in periphral blood mononuclear cell		NM_003584.2	8446	DUSP11	dual specificity phosphatase 11 (RNA/RNP complex 1-interacting)	0	0.29	0.16	0.56	0.19	-1.49	-1.73	-1.42	-1.73	-2.48	0
gi|115554588|dbj|AK236998.1|	115554588	AK236998.1	Sus scrofa mRNA, clone:PBL010069E07, expressed in periphral blood mononuclear cell		NM_005517.3	3151	HMGN2	high-mobility group nucleosomal binding domain 2	0	-3.93	-2.91	-3.91	-3.06	-3.93	-6.73	-13.84	-5.8	-13.84	0
gi|115554610|dbj|AK237020.1|	115554610	AK237020.1	Sus scrofa mRNA, clone:PBL010077F01, expressed in periphral blood mononuclear cell		NM_016530.2	51762	RAB8B	RAB8B, member RAS oncogene family	0	-1.16	-1.36	-2.1	-1.69	-2.18	-3.36	-3.4	-4.45	-2.85	0
gi|115554617|dbj|AK237028.1|	115554617	AK237028.1	Sus scrofa mRNA, clone:PBL010079C03, expressed in periphral blood mononuclear cell		NM_001161359.1	23149	FCHO1	FCH domain only 1	0	-0.88	0.04	-0.02	-0.99	-9.37	-2.68	-9.37	-2.5	-9.37	0
gi|115554625|dbj|AK237036.1|	115554625	AK237036.1	Sus scrofa mRNA, clone:PBL010081A01, expressed in periphral blood mononuclear cell		NM_016061.2	51646	YPEL5	yippee-like 5 (Drosophila)	0	-0.3	0.12	-0.35	-0.58	-1.83	-1.79	-1.12	-0.88	-1.71	0
gi|115554640|dbj|AK237051.1|	115554640	AK237051.1	Sus scrofa mRNA, clone:PBL010086C04, expressed in periphral blood mononuclear cell		NM_015533.3	26007	DAK	dihydroxyacetone kinase 2 homolog (S. cerevisiae)	0	-0.86	-0.33	-0.47	-0.1	-0.59	-2.08	-2.87	-4.13	-3.61	0
gi|115554648|dbj|AK237059.1|	115554648	AK237059.1	Sus scrofa mRNA, clone:PBL010087D09, expressed in periphral blood mononuclear cell		BC007774.2	79650	C16orf57	chromosome 16 open reading frame 57	0	1.42	1.14	1.35	0.83	-1.02	-2.34	-1.9	-9.02	-9.02	0
gi|115554661|dbj|AK237072.1|	115554661	AK237072.1	Sus scrofa mRNA, clone:PBL010091E06, expressed in periphral blood mononuclear cell		AK294913.1	22821	RASA3	RAS p21 protein activator 3	0	-0.74	0.03	0.12	-1.14	-1.5	-2.65	-2.22	-2.56	-3.64	0
gi|115554680|dbj|AK237091.1|	115554680	AK237091.1	Sus scrofa mRNA, clone:PBL010100E05, expressed in periphral blood mononuclear cell		AP001717.1	54022	RPS5P3	ribosomal protein S5 pseudogene 3	0	-1.87	-1.77	-2.72	-3.49	-2.93	-6.41	-4.4	-4.33	-4.56	0
gi|115554740|dbj|AK237151.1|	115554740	AK237151.1	Sus scrofa mRNA, clone:SPL010005B05, expressed in spleen		AK302605.1	84342	COG8	component of oligomeric golgi complex 8	0	0.44	0.58	0.91	0.97	-0.45	-0.68	-0.7	-1.73	-3.51	0
gi|115554750|dbj|AK233563.1|	115554750	AK233563.1	Sus scrofa mRNA, clone:LVRM10173C08, expressed in liver		NM_152396.2	131965	METTL6	methyltransferase like 6	0	-0.3	0.1	-0.05	-0.35	-0.97	-1.21	-3.44	-2.53	-2.97	0
gi|115554762|dbj|AK233574.1|	115554762	AK233574.1	Sus scrofa mRNA, clone:LVRM10177C10, expressed in liver		NM_001100424.1	26010	SPATS2L	spermatogenesis associated, serine-rich 2-like	0	1.2	1.02	0.22	-0.51	-1.69	-1.85	-2.34	-3.55	-2.07	0
gi|115554766|dbj|AK233578.1|	115554766	AK233578.1	Sus scrofa mRNA, clone:LVRM10178A07, expressed in liver						0	-1.4	-1.15	-0.9	-1.31	-2.88	-9.47	-9.47	-9.47	-9.47	0
gi|115554795|dbj|AK233607.1|	115554795	AK233607.1	Sus scrofa mRNA, clone:LVRM10185C08, expressed in liver	LOC100157655	NM_000127.2	2131	EXT1	exostoses (multiple) 1	0	-2.88	-2.64	-1.15	-1.8	-3.37	-9.37	-9.37	-9.37	-9.37	0
gi|115554806|dbj|AK233618.1|	115554806	AK233618.1	Sus scrofa mRNA, clone:LVRM10188F10, expressed in liver		NM_001032387.1	6821	SUOX	sulfite oxidase	0	-1.04	-0.93	-1.55	-1.1	-1.04	-0.9	-1.61	-4.51	-3.58	0
gi|115554822|dbj|AK233634.1|	115554822	AK233634.1	Sus scrofa mRNA, clone:LVRM10192G01, expressed in liver		NM_001079881.1	25865	PRKD2	protein kinase D2	0	-1.16	-1.27	-0.92	-1.33	-2.83	-2.86	-3.76	-2.62	-3.7	0
gi|115554826|dbj|AK233638.1|	115554826	AK233638.1	Sus scrofa mRNA, clone:LVRM10193F12, expressed in liver		AK311927.1	5037	PEBP1	phosphatidylethanolamine binding protein 1	0	-0.25	-0.61	-0.76	-0.98	-2.01	-2.06	-0.76	-2.77	-2.69	0
gi|115554855|dbj|AK233667.1|	115554855	AK233667.1	Sus scrofa mRNA, clone:LVRM10200H06, expressed in liver		NM_012262.3	9653	HS2ST1	heparan sulfate 2-O-sulfotransferase 1	0	-1.21	-1.32	-0.71	-1.54	-3.09	-4.31	-5.46	-6.14	-6.22	0
gi|115554866|dbj|AK233678.1|	115554866	AK233678.1	Sus scrofa mRNA, clone:LVRM10204A08, expressed in liver		NM_018047.2	55696	RBM22	RNA binding motif protein 22	0	-0.8	-0.45	-0.57	-0.72	-1.02	-1.2	-2.23	-1.26	-2.21	0
gi|115554899|dbj|AK233711.1|	115554899	AK233711.1	Sus scrofa mRNA, clone:MLN010002G01, expressed in mesenteric lymph node		NM_017444.4	54108	CHRAC1	chromatin accessibility complex 1	0	-0.77	-0.5	-0.87	-0.54	-1.26	-2.74	-3.2	-2.05	-2.97	0
gi|115554919|dbj|AK233731.1|	115554919	AK233731.1	Sus scrofa mRNA, clone:MLN010006G08, expressed in mesenteric lymph node		NM_001387.2	1809	DPYSL3	dihydropyrimidinase-like 3	0	-0.88	-0.88	-1.85	-1.63	-5.1	-6.19	-6.24	-4.77	-6.14	0
gi|115554962|dbj|AK240161.1|	115554962	AK240161.1	Sus scrofa mRNA, clone:UTR010036E02, expressed in uterus		AK225997.1	81577	GFOD2	glucose-fructose oxidoreductase domain containing 2	0	-1.34	-2.17	-2.37	-1.8	-2.5	-2.14	-2.48	-2.96	-3.72	0
gi|115554984|dbj|AK240183.1|	115554984	AK240183.1	Sus scrofa mRNA, clone:UTR010038H01, expressed in uterus		AK225248.1	2873	GPS1	G protein pathway suppressor 1	0	-0.75	-0.48	-0.2	-0.74	-0.51	-0.78	-1.52	-4.86	-5.68	0
gi|115555012|dbj|AK240211.1|	115555012	AK240211.1	Sus scrofa mRNA, clone:UTR010041C05, expressed in uterus		NM_000358.2	7045	TGFBI	transforming growth factor, beta-induced, 68kDa	0	-0.88	-0.45	-0.94	-1.29	-3.45	-3.41	-4.81	-2.87	-3.12	0
gi|115555017|dbj|AK240216.1|	115555017	AK240216.1	Sus scrofa mRNA, clone:UTR010041F02, expressed in uterus		AC122718.2	643220	RPL3P6	ribosomal protein L3 pseudogene 6	0	-0.53	-0.73	-0.87	-1.17	-2.18	-1.92	-2.28	-2.48	-2.05	0
gi|115555020|dbj|AK240219.1|	115555020	AK240219.1	Sus scrofa mRNA, clone:UTR010041G09, expressed in uterus		AK021685.1	51053	GMNN	geminin, DNA replication inhibitor	0	-1.02	-2.53	-3.12	-1.47	-1.7	-3.11	-4.34	-5.59	-3.97	0
gi|115555023|dbj|AK240222.1|	115555023	AK240222.1	Sus scrofa mRNA, clone:UTR010042B08, expressed in uterus		AK301557.1	5747	PTK2	PTK2 protein tyrosine kinase 2	0	-1.39	-0.79	-0.74	-0.92	-1.73	-2.07	-1.87	-2.38	-2.51	0
gi|115555041|dbj|AK240240.1|	115555041	AK240240.1	Sus scrofa mRNA, clone:UTR010044A12, expressed in uterus		BC105933.1	55291	SAPS3	SAPS domain family, member 3	0	0.14	0.17	0.15	0.08	-1.2	-1.46	-1.37	-1.77	-1.59	0
gi|115555046|dbj|AK240245.1|	115555046	AK240245.1	Sus scrofa mRNA, clone:UTR010044H01, expressed in uterus		NM_032040.3	83987	CCDC8	coiled-coil domain containing 8	0	-1.22	-0.44	-0.61	-0.51	-0.34	-2	-4.56	-4.66	-5.32	0
gi|115555129|dbj|AK240329.1|	115555129	AK240329.1	Sus scrofa mRNA, clone:UTR010054G05, expressed in uterus		AK315875.1	3308	HSPA4	heat shock 70kDa protein 4	0	0.21	-0.1	-0.05	0.06	-0.06	-1.16	-0.7	-1.46	-0.77	0
gi|115555134|dbj|AK240334.1|	115555134	AK240334.1	Sus scrofa mRNA, clone:UTR010055H03, expressed in uterus		AK290326.1	10205	MPZL2	myelin protein zero-like 2	0	-4.64	-4.95	-4.86	-5.37	-11.94	-11.94	-11.94	-11.94	-11.94	0
gi|115555135|dbj|AK240335.1|	115555135	AK240335.1	Sus scrofa mRNA, clone:UTR010055H08, expressed in uterus		NM_018650.3	4139	MARK1	MAP/microtubule affinity-regulating kinase 1	0	-0.37	-1.12	-2.16	-1.49	-2.06	-2.91	-3.8	-3.73	-2.67	0
gi|115555140|dbj|AK240340.1|	115555140	AK240340.1	Sus scrofa mRNA, clone:UTR010056F09, expressed in uterus		AK297524.1	10616	RBCK1	RanBP-type and C3HC4-type zinc finger containing 1	0	0.16	-0.03	-0.15	-0.71	-1.34	-1.59	-2.75	-2.83	-3.08	0
gi|115555150|dbj|AK233765.1|	115555150	AK233765.1	Sus scrofa mRNA, clone:MLN010021B01, expressed in mesenteric lymph node		BC008912.2	60343	FAM3A	family with sequence similarity 3, member A	0	0.22	0.55	0.59	0.41	-0.09	-0.59	0.14	-2.51	-2.98	0
gi|115555155|dbj|AK233770.1|	115555155	AK233770.1	Sus scrofa mRNA, clone:MLN010023C06, expressed in mesenteric lymph node		AK057005.1	56984	PSMG2	proteasome (prosome, macropain) assembly chaperone 2	0	-0.84	-0.7	-0.76	-1.1	0.3	-1.47	-1.1	-2.18	-2.13	0
gi|115555201|dbj|AK233816.1|	115555201	AK233816.1	Sus scrofa mRNA, clone:MLN010037C04, expressed in mesenteric lymph node		NM_001098625.1	51528	JKAMP	JNK1/MAPK8-associated membrane protein	0	-0.53	-0.4	-0.2	-0.62	-1.82	-0.62	-1.22	-2.96	-3.77	0
gi|115555249|dbj|AK233864.1|	115555249	AK233864.1	Sus scrofa mRNA, clone:MLN010055B01, expressed in mesenteric lymph node		NM_001662.2	381	ARF5	ADP-ribosylation factor 5	0	-0.38	-0.28	-0.68	-1.15	-1.51	-0.54	-1.36	-3.75	-2.82	0
gi|115555283|dbj|AK233898.1|	115555283	AK233898.1	Sus scrofa mRNA, clone:MLN010063C05, expressed in mesenteric lymph node		XM_002344668.1	100291790	LOC100291790	hypothetical protein LOC100291790	0	1.51	1.1	0.99	0.01	-9.26	-9.26	-9.26	-9.26	-9.26	0
gi|115555320|dbj|AK233935.1|	115555320	AK233935.1	Sus scrofa mRNA, clone:MLN010072C12, expressed in mesenteric lymph node		BC009421.1	80025	PANK2	pantothenate kinase 2	0	0.28	0.11	0.72	0.93	0.28	-0.89	-1.38	-2.63	-3.71	0
gi|115555345|dbj|AK233958.1|	115555345	AK233958.1	Sus scrofa mRNA, clone:MLN010079G10, expressed in mesenteric lymph node		AK225087.1	65260	C1orf163	chromosome 1 open reading frame 163	0	0.15	-0.59	-1.01	-0.47	-0.83	-3.4	-1.74	-4.23	-4.3	0
gi|115555362|dbj|AK233975.1|	115555362	AK233975.1	Sus scrofa mRNA, clone:MLN010084C08, expressed in mesenteric lymph node						0	0.42	0.71	0.35	0.01	-8.65	-8.65	-8.65	-2.79	-8.65	0
gi|115555466|dbj|AK234079.1|	115555466	AK234079.1	Sus scrofa mRNA, clone:OVR010004H09, expressed in ovary		BC035691.1	2936	GSR	glutathione reductase	0	-0.81	-1.09	-1.87	-0.99	-1.21	-1.46	-3	-3.79	-4.01	0
gi|115555486|dbj|AK234099.1|	115555486	AK234099.1	Sus scrofa mRNA, clone:OVR010007D10, expressed in ovary		AY487344.1	28987	NOB1	NIN1/RPN12 binding protein 1 homolog (S. cerevisiae)	0	-0.93	-0.5	-0.97	-0.63	-0.12	-1.46	-3.25	-10.37	-10.37	0
gi|115555495|dbj|AK234108.1|	115555495	AK234108.1	Sus scrofa mRNA, clone:OVR010008B11, expressed in ovary		NR_024108.1	5211	PFKL	phosphofructokinase, liver	0	-1.26	-1.04	-0.81	-1.12	-0.64	-3.26	-3.69	-3.07	-3.14	0
gi|115555565|dbj|AK237197.1|	115555565	AK237197.1	Sus scrofa mRNA, clone:SPL010011C06, expressed in spleen		EU176306.1	839	CASP6	caspase 6, apoptosis-related cysteine peptidase	0	-1.99	-2.96	-3.42	-2.8	-3.59	-3.07	-3.64	-10.18	-10.18	0
gi|115555580|dbj|AK237212.1|	115555580	AK237212.1	Sus scrofa mRNA, clone:SPL010012B12, expressed in spleen		NM_152653.3	7325	UBE2E2	ubiquitin-conjugating enzyme E2E 2 (UBC4/5 homolog, yeast)	0	-0.55	0.01	0.46	0.92	-0.2	-1.29	-1.67	-9.2	-9.2	0
gi|115555588|dbj|AK237220.1|	115555588	AK237220.1	Sus scrofa mRNA, clone:SPL010013C01, expressed in spleen		NM_001946.2	1848	DUSP6	dual specificity phosphatase 6	0	-0.68	-0.66	-0.98	-0.96	-2.79	-2.11	-2.5	-3.31	-3.19	0
gi|115555655|dbj|AK237288.1|	115555655	AK237288.1	Sus scrofa mRNA, clone:SPL010021C08, expressed in spleen		BC014156.2	124565	SLC38A10	solute carrier family 38, member 10	0	-0.08	0.36	-0.57	-1.03	-1.18	-1.78	-2.54	-2.11	-2.64	0
gi|115555678|dbj|AK237311.1|	115555678	AK237311.1	Sus scrofa mRNA, clone:SPL010023A12, expressed in spleen		NM_024511.5	79441	HAUS3	HAUS augmin-like complex, subunit 3	0	-0.63	-0.49	-0.4	-0.83	-1.66	-1.4	-1.93	-3.12	-4	0
gi|115555693|dbj|AK237326.1|	115555693	AK237326.1	Sus scrofa mRNA, clone:SPL010024D05, expressed in spleen		NM_005782.3	10189	THOC4	THO complex 4	0	-0.67	-0.55	-0.8	-0.94	-1.54	-3.61	-3.25	-3.92	-3.49	0
gi|118403777|ref|NM_001078685.1|	118403777	NM_001078685.1	Sus scrofa CLIM2 (LOC780436), mRNA	LOC780436	NM_001113407.1	8861	LDB1	LIM domain binding 1	0	-2.62	-1.7	-1.66	-1.47	-1.98	-2.13	-4.51	-11.63	-11.63	0
gi|118403821|ref|NM_001078679.1|	118403821	NM_001078679.1	Sus scrofa CD81 molecule (CD81), mRNA	CD81	NM_004356.3	975	CD81	CD81 molecule	0	-2.7	-1.68	-2.53	-2.33	-2.64	-3.57	-4.21	-7.21	-7.29	0
gi|118403869|ref|NM_001078669.1|	118403869	NM_001078669.1	Sus scrofa N-acetylglucosaminyltransferase I.2 (LOC780413), mRNA	LOC780413	AY358592.1	55624	POMGNT1	protein O-linked mannose beta1,2-N-acetylglucosaminyltransferase	0	-0.57	-0.16	0.19	0.09	-1.08	-2.11	-1.19	-4.04	-4.12	0
gi|119310177|ref|NM_001032376.2|	119310177	NM_001032376.2	Sus scrofa hypoxanthine phosphoribosyltransferase 1 (HPRT1), mRNA	HPRT1	NM_000194.2	3251	HPRT1	hypoxanthine phosphoribosyltransferase 1	0	0.47	0.48	0.04	0.09	-0.09	-1.12	-1.31	-1.24	-2.96	0
gi|123965226|gb|EF183523.1|	123965226	EF183523.1	Sus scrofa lysophosphatidic acid receptor 1 mRNA, partial cds	LOC100038032	U78192.1	1902	LPAR1	lysophosphatidic acid receptor 1	0	-3.71	-2.36	-4.02	-9.77	-3.77	-9.77	-9.77	-9.77	-9.77	0
gi|124558111|gb|EF154832.1|	124558111	EF154832.1	Sus scrofa angiopoietin-like protein 6 (Angptl6) mRNA, partial cds	ANGPTL6	BC142632.1	83854	ANGPTL6	angiopoietin-like 6	0	-3.04	-2.46	-4.04	-4.22	-11.12	-11.12	-11.12	-11.12	-11.12	0
gi|1245714|gb|S80644.1|	1245714	S80644.1	Sus scrofa glutaminase mRNA, partial cds; nuclear gene for mitochondrial product	GLS	AF327434.1	2744	GLS	glutaminase	0	-0.65	-0.69	-0.45	-0.6	-1.28	-1.48	-1.5	-11.49	-11.49	0
gi|125490322|ref|NM_213824.2|	125490322	NM_213824.2	Sus scrofa p53 protein (LOC396767), mRNA	LOC396767	AK297927.1	7157	TP53	tumor protein p53	0	-0.57	0.12	-0.42	-0.2	-0.62	-3.79	-3.95	-2.09	-3.37	0
gi|138753472|emb|AM503091.1|	138753472	AM503091.1	Sus scrofa partial mRNA for fibrillin 2 (FBN2 gene), breed Pietrain	FBN2	NM_001999.3	2201	FBN2	fibrillin 2	0	-2.38	-2.78	-3.39	-4.18	-4.69	-13.28	-13.28	-13.28	-13.28	0
gi|145208000|ref|NM_001083932.1|	145208000	NM_001083932.1	Sus scrofa integrin, alpha V (vitronectin receptor, alpha polypeptide, antigen CD51) (ITGAV), mRNA	ITGAV	NM_002210.3	3685	ITGAV	integrin, alpha V (vitronectin receptor, alpha polypeptide, antigen CD51)	0	-0.05	0.19	-0.83	-0.44	-2.36	-2.26	-3.06	-1.99	-1.69	0
gi|146741279|dbj|AB271920.1|	146741279	AB271920.1	Sus scrofa ADAMTS20 mRNA for ADAM metallopeptidase with thrombospondin type 1 motif 20, partial cds	ADAMTS20	NM_025003.3	80070	ADAMTS20	ADAM metallopeptidase with thrombospondin type 1 motif, 20	0	-1.76	-2.07	-1.6	-1.98	-0.12	-4.9	-3.15	-11	-11	0
gi|147905018|ref|NM_001097514.1|	147905018	NM_001097514.1	Sus scrofa solute carrier family 15 (H+/peptide transporter), member 2 (SLC15A2), mRNA	SLC15A2	NM_021082.3	6565	SLC15A2	solute carrier family 15 (H+/peptide transporter), member 2	0	-1.66	-1.97	-2.54	-3.57	-10.47	-10.47	-10.47	-10.47	-10.47	0
gi|147905487|ref|NM_001097446.1|	147905487	NM_001097446.1	Sus scrofa apolipoprotein B mRNA editing enzyme, catalytic polypeptide-like 3F (APOBEC3F), mRNA	APOBEC3F	NM_020661.2	57379	AICDA	activation-induced cytidine deaminase	0	0.79	0.71	1.15	1.01	-0.65	-0.22	0.34	-8.65	-8.65	0
gi|148228719|ref|NM_001097439.1|	148228719	NM_001097439.1	Sus scrofa carboxypeptidase E (CPE), mRNA	CPE	BC033866.1	1363	CPE	carboxypeptidase E	0	-0.8	-0.87	-1.53	-1.65	-4.25	-4.72	-4.28	-4.59	-6.84	0
gi|148232615|ref|NM_001097519.1|	148232615	NM_001097519.1	Sus scrofa gap junction protein, delta 3, 31.9kDa (GJD3), mRNA	GJD3	NM_001080383.1	10052	GJC1	gap junction protein, gamma 1, 45kDa	0	-0.2	-0.46	-1.13	-2.28	-2.93	-3.51	-4.4	-10.94	-10.94	0
gi|148232727|ref|NM_001097447.1|	148232727	NM_001097447.1	Sus scrofa retinoid x receptor interacting protein (RAP80), mRNA	RAP80	NM_016290.3	51720	UIMC1	ubiquitin interaction motif containing 1	0	-1.09	-0.89	-1.03	-1.18	-1.41	-2.8	-2.91	-2.79	-4.53	0
gi|148233142|ref|NM_001097435.1|	148233142	NM_001097435.1	Sus scrofa procollagen-proline, 2-oxoglutarate 4-dioxygenase (proline 4-hydroxylase), alpha polypeptide I (P4HA1), mRNA	P4HA1	NM_001017962.2	5033	P4HA1	prolyl 4-hydroxylase, alpha polypeptide I	0	-0.2	-0.2	-0.04	-0.28	-0.74	-1.46	-0.47	-2.18	-2.22	0
gi|148233297|ref|NM_001097485.1|	148233297	NM_001097485.1	Sus scrofa heat shock factor binding protein 1 (HSBP1), mRNA	HSBP1	BC007515.2	3281	HSBP1	heat shock factor binding protein 1	0	-1.66	-1.82	-1.73	-1.94	-0.64	-1.79	-1.88	-6.18	-5.12	0
gi|148237120|ref|NM_001097421.1|	148237120	NM_001097421.1	Sus scrofa myocyte enhancer factor 2A (MEF2A), transcript variant 1, mRNA	MEF2A	NM_001130926.1	4205	MEF2A	myocyte enhancer factor 2A	0	-1.5	-1.37	-1.15	-1.1	-1.54	-1.91	-1.37	-2.45	-2.75	0
gi|148237281|ref|NM_001097478.1|	148237281	NM_001097478.1	Sus scrofa ribosomal protein L14 (RPL14), mRNA	RPL14	NM_003973.3	9045	RPL14	ribosomal protein L14	0	-1.03	-0.45	-0.35	-0.67	-1.21	-2.18	-2.39	-1.55	-1.86	0
gi|148747250|ref|NM_001098596.1|	148747250	NM_001098596.1	Sus scrofa crystallin, zeta (quinone reductase)-like 1 (CRYZL1), mRNA	CRYZL1	NM_145858.2	9946	CRYZL1	crystallin, zeta (quinone reductase)-like 1	0	-0.36	-0.61	-0.66	-0.16	-0.34	-1.42	-0.99	-3.32	-3.4	0
gi|148747341|ref|NM_001098585.1|	148747341	NM_001098585.1	Sus scrofa adaptor-related protein complex 3, beta 1 subunit (AP3B1), mRNA	AP3B1	BC038444.1	8546	AP3B1	adaptor-related protein complex 3, beta 1 subunit	0	-2.82	-3.39	-4.36	-3.55	-3.53	-2.2	-10.12	-10.12	-10.12	0
gi|148747452|ref|NM_001098603.1|	148747452	NM_001098603.1	Sus scrofa Hermansky-Pudlak syndrome 5 (HPS5), mRNA	HPS5	AK291663.1	11234	HPS5	Hermansky-Pudlak syndrome 5	0	-2.64	-1.78	-2.82	-2.21	-1.58	-2.67	-4.04	-10.58	-10.58	0
gi|153791354|ref|NM_001099940.1|	153791354	NM_001099940.1	Sus scrofa epithelial membrane protein 1 (EMP1), mRNA	EMP1	NM_001423.2	2012	EMP1	epithelial membrane protein 1	0	-3.88	-4.37	-2.61	-2.48	-2.36	-10.37	-10.37	-10.37	-10.37	0
gi|153792048|ref|NM_001099934.1|	153792048	NM_001099934.1	Sus scrofa tenomodulin (TNMD), mRNA	TNMD	AB055421.1	64102	TNMD	tenomodulin	0	-1.35	-1.7	-3.86	-3.93	-8.52	-14.52	-14.52	-14.52	-14.52	0
gi|153792324|ref|NM_001097517.1|	153792324	NM_001097517.1	Sus scrofa BTG family, member 3 (BTG3), mRNA	BTG3	NM_006806.4	10950	BTG3	BTG family, member 3	0	-0.16	-0.36	-0.45	-0.2	-2.06	-2.24	-2.68	-4.2	-4.14	0
gi|153792599|ref|NM_001099930.1|	153792599	NM_001099930.1	Sus scrofa fatty acid synthase (FASN), mRNA	FASN	NM_004104.4	2194	FASN	fatty acid synthase	0	-0.38	-0.66	-1.08	-1.86	-3.34	-4.82	-4.88	-12.74	-5.36	0
gi|154147591|ref|NM_001100191.1|	154147591	NM_001100191.1	Sus scrofa eukaryotic translation initiation factor 4E family member 2 (EIF4E2), mRNA	EIF4E2	BC021690.1	9470	EIF4E2	eukaryotic translation initiation factor 4E family member 2	0	0.77	-0.34	-2.13	-2.63	-1.2	-3.1	-9.2	-9.2	-9.2	0
gi|154147643|ref|NM_001100193.1|	154147643	NM_001100193.1	Sus scrofa eukaryotic translation initiation factor 4A, isoform 3 (EIF4A3), mRNA	EIF4A3	AK290608.1	9775	EIF4A3	eukaryotic translation initiation factor 4A3	0	0.56	0.03	-0.4	-0.73	-1.12	-0.72	-2.48	-2.75	-1.29	0
gi|155369755|ref|NM_001101026.1|	155369755	NM_001101026.1	Sus scrofa squalene epoxidase (SQLE), mRNA	SQLE	AK225085.1	6713	SQLE	squalene epoxidase	0	-1.15	-1.22	-2.02	-3.06	-3.14	-11.95	-5.42	-11.95	-11.95	0
gi|155369761|ref|NM_001101029.1|	155369761	NM_001101029.1	Sus scrofa asparagine-linked glycosylation 2 (ALG2), mRNA	ALG2	NM_033087.3	85365	ALG2	asparagine-linked glycosylation 2, alpha-1,3-mannosyltransferase homolog (S. cerevisiae)	0	-1	-0.8	-1.11	-1.39	-2.02	-2.47	-3.62	-1.86	-1.69	0
gi|156120135|ref|NM_001101827.1|	156120135	NM_001101827.1	Sus scrofa antigen identified by monoclonal antibody Ki-67 (MKI67), mRNA	MKI67	AK299814.1	84365	MKI67IP	MKI67 (FHA domain) interacting nucleolar phosphoprotein	0	0.04	-0.07	-0.41	-0.4	0.62	-1.11	-1.62	-1.57	-2.44	0
gi|156120139|ref|NM_001101817.1|	156120139	NM_001101817.1	Sus scrofa superkiller viralicidic activity 2-like (S. cerevisiae) (SKIV2L), mRNA	SBAB-707F1.2	NM_006929.4	6499	SKIV2L	superkiller viralicidic activity 2-like (S. cerevisiae)	0	-1.02	-0.21	-0.64	-0.47	-0.66	-0.88	-2.67	-2.34	-2.54	0
gi|156120149|ref|NM_001101823.1|	156120149	NM_001101823.1	Sus scrofa euchromatic histone-lysine N-methyltransferase 2 (EHMT2), mRNA	SBAB-707F1.1	NM_025256.5	10919	EHMT2	euchromatic histone-lysine N-methyltransferase 2	0	0.48	-0.86	-0.78	-0.79	-2.63	-1.53	-2.91	-2.58	-2.85	0
gi|156123600|gb|EU030283.2|	156123600	EU030283.2	Sus scrofa sirtuin 1 (SIRT1) mRNA, complete cds	SIRT1					0	-0.06	0.15	0.34	0.41	-1.78	-1.88	-1.99	-4.73	-4.22	0
gi|157427714|ref|NM_001105294.1|	157427714	NM_001105294.1	Sus scrofa potassium voltage-gated channel, shaker-related subfamily, beta member 1 (KCNAB1), mRNA	KCNAB1	NM_172159.3	7881	KCNAB1	potassium voltage-gated channel, shaker-related subfamily, beta member 1	0	1.6	0.11	-0.52	0.04	0.56	-3.98	-10.08	-3.64	-10.08	0
gi|157427727|ref|NM_001105302.1|	157427727	NM_001105302.1	Sus scrofa ATP citrate lyase (ACL), mRNA	ACL	AK295675.1	47	ACLY	ATP citrate lyase	0	-1.23	-1.31	-1.33	-1.78	-1.93	-3.57	-3.72	-5.38	-6.47	0
gi|157427747|ref|NM_001105296.1|	157427747	NM_001105296.1	Sus scrofa RAE1 RNA export 1 homolog (S. pombe) (RAE1), mRNA	CH242-98D1.2	AK292247.1	8480	RAE1	RAE1 RNA export 1 homolog (S. pombe)	0	-0.69	-0.34	-0.35	-0.84	-0.65	-1.13	-2.66	-2.48	-1.87	0
gi|15824733|gb|AF329358.1|AF329358	15824733	AF329358.1	Sus scrofa laminin beta-1 chain mRNA, partial cds	LAMB1	NM_002291.2	3912	LAMB1	laminin, beta 1	0	1.45	1.15	0.92	1.02	-1.66	-0.89	-2.87	-9.99	-9.99	0
gi|158262680|ref|NM_001109947.1|	158262680	NM_001109947.1	Sus scrofa angiopoietin-like 1 (ANGPTL1), mRNA	ANGPTL1	BC050640.1	9068	ANGPTL1	angiopoietin-like 1	0	-0.14	0.21	-0.05	0.41	-1.36	-1.13	-2	-5.19	-5.69	0
gi|15864598|emb|AJ309014.1|	15864598	AJ309014.1	Sus scrofa partial mRNA for myosin heavy chain (MYHC gene)	MYHC	NM_002470.2	4621	MYH3	myosin, heavy chain 3, skeletal muscle, embryonic	0	-0.9	-0.25	0.24	-0.51	-9.47	-9.47	-9.47	-9.47	-9.47	0
gi|160333776|ref|NM_001110432.1|	160333776	NM_001110432.1	Sus scrofa ortholog of human chromosome 20 open reading frame 43 (C17H20orf43), mRNA	CR956640.6	BC003359.1	51507	C20orf43	chromosome 20 open reading frame 43	0	0.57	0.15	0.03	-0.04	-0.94	-0.53	-2.05	-2.02	-1.71	0
gi|160420270|ref|NM_001044582.1|	160420270	NM_001044582.1	Sus scrofa zinc finger protein 265 (LOC733651), mRNA	LOC733651	NM_203350.1	9406	ZRANB2	zinc finger, RAN-binding domain containing 2	0	-1.73	-1.26	-1.66	-1.36	-1.98	-2.3	-2.99	-3.33	-3.68	0
gi|162139822|ref|NM_001111257.1|	162139822	NM_001111257.1	Sus scrofa lamin A/C (LMNA), mRNA	LMNA	NM_170707.2	4000	LMNA	lamin A/C	0	-0.4	-0.4	-0.89	-0.84	-0.68	-2.34	-2.19	-2.38	-2.63	0
gi|162951804|ref|NM_001112687.1|	162951804	NM_001112687.1	Sus scrofa amine oxidase (flavin containing) domain 2 isoform a (AOF2), mRNA	KDM1	NM_001009999.2	23028	KDM1A	lysine (K)-specific demethylase 1A	0	-0.82	-0.62	-1.05	-1.85	-1.6	-3.04	-3.47	-12.46	-12.46	0
gi|164486|gb|M29072.1|PIGHEP1	164486	M29072.1	Pig unidentified hepatic protein mRNA	----	NM_006825.3	10970	CKAP4	cytoskeleton-associated protein 4	0	-2.37	-1.73	-2.02	-2.36	-4.38	-5.39	-6.54	-13.08	-13.08	0
gi|164518957|ref|NM_001113287.1|	164518957	NM_001113287.1	Sus scrofa lactate dehydrogenase B (LDHB), mRNA	LDHB	NM_002300.5	3945	LDHB	lactate dehydrogenase B	0	-0.17	-0.4	-1.2	-2.02	-0.18	-2.12	-3.17	-1.65	-2.41	0
gi|164664465|ref|NM_001113437.1|	164664465	NM_001113437.1	Sus scrofa leucine-rich repeat kinase 2 (LRRK2), mRNA	LRRK2	NM_198578.3	120892	LRRK2	leucine-rich repeat kinase 2	0	-1.88	-1.77	-4.42	-1.44	-2.85	-2.26	-2.32	-10.18	-10.18	0
gi|165973429|ref|NM_001113697.1|	165973429	NM_001113697.1	Sus scrofa slowmo homolog 2 (Drosophila) (SLMO2), mRNA	CH242-247L10.6	AK314449.1	51012	SLMO2	slowmo homolog 2 (Drosophila)	0	0.48	0.32	0.44	0.45	-0.4	-0.36	-0.31	-1.02	-1.96	0
gi|165973431|ref|NM_001113698.1|	165973431	NM_001113698.1	Sus scrofa TH1-like (Drosophila) (TH1L), mRNA	CH242-247L10.2	AK293410.1	51497	TH1L	TH1-like (Drosophila)	0	0.47	0.43	0.79	0.53	-0.85	-0.28	-1.66	-1.42	-1	0
gi|166796042|ref|NM_001114275.1|	166796042	NM_001114275.1	Sus scrofa nuclear receptor coactivator 2 (NCOA2), mRNA	NCOA2	NM_006540.2	10499	NCOA2	nuclear receptor coactivator 2	0	-2.04	-1.35	-2.07	-1.98	-2.21	-2.07	-12.08	-5.63	-12.08	0
gi|166796056|ref|NM_001114282.1|	166796056	NM_001114282.1	Sus scrofa cyclin B2 (CCNB2), mRNA	CCNB2	NM_004701.2	9133	CCNB2	cyclin B2	0	0.34	-1.57	-3.39	-0.41	-9.15	-3.04	-9.15	-9.15	-9.15	0
gi|167908788|ref|NM_001114675.1|	167908788	NM_001114675.1	Sus scrofa HLA-B associated transcript 2 (LOC100137083), mRNA	LOC100137083	BC060668.1	7916	BAT2	HLA-B associated transcript 2	0	-0.7	-0.38	-0.41	-0.54	-0.89	-2.17	-3.09	-4.05	-2.84	0
gi|167908790|ref|NM_001114676.1|	167908790	NM_001114676.1	Sus scrofa EPLIN-b (LOC100137084), mRNA	LOC100137084	NM_016357.4	51474	LIMA1	LIM domain and actin binding 1	0	-0.16	-0.25	-0.85	-2.1	-3.13	-4.78	-3.42	-4.02	-5.38	0
gi|167908792|ref|NM_001114670.1|	167908792	NM_001114670.1	Sus scrofa tyrosine kinase 2 (TYK2), mRNA	TYK2	NM_003331.4	7297	TYK2	tyrosine kinase 2	0	-0.71	-0.46	-0.41	-0.44	-1.53	-2.57	-2.5	-1.71	-2.69	0
gi|167908796|ref|NM_001114672.1|	167908796	NM_001114672.1	Sus scrofa ATPase, Class II, type 9A (ATP9A), mRNA	CH242-152A8.1	NM_006045.1	10079	ATP9A	ATPase, class II, type 9A	0	-0.63	-0.51	-0.12	-0.29	-1.36	-0.89	-1.8	-2.17	-1.73	0
gi|178056455|ref|NM_001123094.1|	178056455	NM_001123094.1	Sus scrofa cell division cycle 20 homolog (S. cerevisiae) (CDC20), mRNA	CDC20	EU831712.1	991	CDC20	cell division cycle 20 homolog (S. cerevisiae)	0	-1.69	-1.54	-3	-4.19	-10.34	-10.34	-10.34	-10.34	-10.34	0
gi|178056469|ref|NM_001123222.1|	178056469	NM_001123222.1	Sus scrofa N-acetylgalactosaminidase, alpha- (NAGA), mRNA	NAGA	NM_000262.2	4668	NAGA	N-acetylgalactosaminidase, alpha-	0	-0.44	-0.06	-1.11	-0.56	-0.73	-1.63	-2.56	-2.81	-3.89	0
gi|178056489|ref|NM_001123144.1|	178056489	NM_001123144.1	Sus scrofa necdin (NECD), mRNA	NECD	NG_009380.1	4692	NDN	necdin homolog (mouse)	0	-2.73	-2.17	-2.94	-2.84	-2.82	-4.31	-5.68	-12.22	-12.22	0
gi|178056505|ref|NM_001123131.1|	178056505	NM_001123131.1	Sus scrofa integral membrane protein 2C (ITM2C), mRNA	ITM2C	AK075361.1	81618	ITM2C	integral membrane protein 2C	0	-2.06	-2.84	-3.63	-3.24	-5.13	-4.6	-5.17	-11.71	-11.71	0
gi|178056507|ref|NM_001123103.1|	178056507	NM_001123103.1	Sus scrofa activating transcription factor 6 beta (ATF6B), mRNA	SBAB-514B12.3	NM_001136153.1	1388	ATF6B	activating transcription factor 6 beta	0	-0.12	0.31	-0.04	-0.1	-1.72	-2.94	-2.28	-3.18	-2.67	0
gi|178056515|ref|NM_001123121.1|	178056515	NM_001123121.1	Sus scrofa glucuronidase, beta (GUSB), mRNA	GUSB	NM_000181.3	2990	GUSB	glucuronidase, beta	0	-2.17	-1.91	-2.55	-2.04	-3.49	-3.79	-3.82	-13.35	-13.35	0
gi|178056609|ref|NM_001123174.1|	178056609	NM_001123174.1	Sus scrofa RAB22A, member RAS oncogene family (RAB22A), mRNA	CR956404.1	NM_020673.2	57403	RAB22A	RAB22A, member RAS oncogene family	0	-1.41	-0.78	-1.28	-1.13	-2.58	-3.01	-3.57	-3.54	-3.86	0
gi|178056622|ref|NM_001123213.1|	178056622	NM_001123213.1	Sus scrofa VAMP (vesicle-associated membrane protein)-associated protein B and C (VAPB), mRNA	CR956404.2	NM_004738.3	9217	VAPB	VAMP (vesicle-associated membrane protein)-associated protein B and C	0	-0.67	-0.48	-0.28	-0.55	0.04	-0.53	-1.48	-2.11	-2.15	0
gi|178056656|ref|NM_001123157.1|	178056656	NM_001123157.1	Sus scrofa pre-B-cell leukemia homeobox 2 pseudogene 1 (PBX2P1), mRNA	SBAB-649D6.7	NM_002586.4	5089	PBX2	pre-B-cell leukemia homeobox 2	0	-0.75	-0.73	-0.67	-1.18	-2.18	-2.82	-3.56	-2.87	-2.88	0
gi|178056662|ref|NM_001123124.1|	178056662	NM_001123124.1	Sus scrofa hypoxia inducible factor 1, alpha subunit (basic helix-loop-helix transcription factor) (HIF1A), mRNA	HIF1A	NM_001530.3	3091	HIF1A	hypoxia inducible factor 1, alpha subunit (basic helix-loop-helix transcription factor)	0	-2.44	-2.22	-2.65	-2.18	-2.4	-3.65	-2.29	-12.21	-12.21	0
gi|178056668|ref|NM_001123099.1|	178056668	NM_001123099.1	Sus scrofa CDC-like kinase 1 (CLK1), mRNA	CLK1	NM_004071.3	1195	CLK1	CDC-like kinase 1	0	-0.85	-0.35	-0.19	-0.04	-1.13	-1.14	-1.44	-3.16	-3.78	0
gi|178056739|ref|NM_001123084.1|	178056739	NM_001123084.1	Sus scrofa Bloom syndrome (BLM), mRNA	BLM	NM_000057.2	641	BLM	Bloom syndrome, RecQ helicase-like	0	0.22	-0.01	-0.49	-0.64	-4.32	-3.89	-3.79	-4.45	-11.32	0
gi|178056747|ref|NM_001123183.1|	178056747	NM_001123183.1	Sus scrofa RAD54-like (RAD54L), mRNA	RAD54L	NM_001142548.1	8438	RAD54L	RAD54-like (S. cerevisiae)	0	-0.69	-0.97	-1.22	-2.36	-10.73	-10.73	-10.73	-3.54	-10.73	0
gi|178056767|ref|NM_001123181.1|	178056767	NM_001123181.1	Sus scrofa RAD51 homolog (RAD51), mRNA	RAD51	NM_002875.4	5888	RAD51	RAD51 homolog (RecA homolog, E. coli) (S. cerevisiae)	0	-0.08	-0.34	-1.61	-1.9	-3.59	-10.18	-10.18	-10.18	-4.39	0
gi|178056773|ref|NM_001123156.1|	178056773	EU402600	Sus scrofa PDZ binding kinase (PBK), mRNA	PBK					0	-3.08	-2.47	-2.81	-2.31	-9.88	-9.88	-9.88	-9.88	-9.88	0
gi|178056780|ref|NM_001123122.1|	178056780	NM_001123122.1	Sus scrofa H2A histone family, member Z (H2AFZ), mRNA	H2AFZ	NM_002106.3	3015	H2AFZ	H2A histone family, member Z	0	1.75	0.79	0.91	0.85	-1.87	-1.83	-1.65	-2.53	-4.15	0
gi|178056823|ref|NM_001123080.1|	178056823	NM_001123080.1	Sus scrofa ataxia telangiectasia mutated (ATM), mRNA	ATM	NM_000051.3	472	ATM	ataxia telangiectasia mutated	0	-0.31	0.1	0.22	-0.16	-1.12	-2.06	-2.31	-4.34	-2.63	0
gi|178056875|ref|NM_001123200.1|	178056875	NM_001123200.1	Sus scrofa testis derived transcript (TES), mRNA	TES	NM_015641.2	26136	TES	testis derived transcript (3 LIM domains)	0	-2.12	-2.58	-3.54	-3.17	-4.38	-4.47	-4.85	-5.51	-5.27	0
gi|178056883|ref|NM_001123198.1|	178056883	NM_001123198.1	Sus scrofa suppression of tumorigenicity 7 (ST7), mRNA	ST7	NM_018412.3	7982	ST7	suppression of tumorigenicity 7	0	-1.24	-0.84	-1.08	-0.94	-1.65	-2.04	-3	-3.2	-3.54	0
gi|178057011|ref|NM_001123105.1|	178057011	NM_001123105.1	Sus scrofa discoidin domain receptor tyrosine kinase 1 (DDR1), mRNA	DDR1	NM_013993.2	780	DDR1	discoidin domain receptor tyrosine kinase 1	0	-2.71	-1.65	-2.18	-3.37	-3.52	-1.41	-9.52	-9.52	-9.52	0
gi|178057176|ref|NM_001123090.1|	178057176	NM_001123090.1	Sus scrofa chromosome 6 open reading frame 153 ortholog (C7H6orf153), mRNA	CH242-196P11.11	BC006293.2	88745	C6orf153	chromosome 6 open reading frame 153	0	-0.7	-0.73	-0.87	-0.73	-0.77	-1.96	-2.66	-2.89	-2.88	0
gi|178057228|ref|NM_001123071.1|	178057228	NM_001123071.1	Sus scrofa activity-dependent neuroprotector (ADNP), mRNA	CH242-4C12.3	NM_181442.1	23394	ADNP	activity-dependent neuroprotector homeobox	0	-4.19	-3.61	-4.12	-4.02	-3.54	-4.2	-6.1	-13.63	-13.63	0
gi|178057315|ref|NM_001123097.1|	178057315	NM_001123097.1	Sus scrofa cyclin-dependent kinase 4 (CDK4), mRNA	CDK4	BC010153.2	1019	CDK4	cyclin-dependent kinase 4	0	-1.13	-0.85	-1.69	-1.97	-2.96	-4.52	-4.01	-5.04	-4.6	0
gi|186886351|gb|EU617320.1|	186886351	EU617320.1	Sus scrofa small calcium-binding mitochondrial carrier 1 (SCAMC-1) mRNA, complete cds; nuclear gene for mitochondrial product		AK316304.1	29957	SLC25A24	solute carrier family 25 (mitochondrial carrier; phosphate carrier), member 24	0	-2.43	-3.25	-2.89	-2.66	-2.42	-10.23	-2.38	-10.23	-10.23	0
gi|186886353|gb|EU617321.1|	186886353	EU617321.1	Sus scrofa small calcium-binding mitochondrial carrier 3 (SCAMC-3) mRNA, complete cds; nuclear gene for mitochondrial product		AJ619988.1	79085	SLC25A23	solute carrier family 25 (mitochondrial carrier; phosphate carrier), member 23	0	0.76	0.47	0.31	-0.49	-1.55	0.04	-1.62	-9.15	-9.15	0
gi|190352252|gb|EU780792.1|	190352252	EU780792.1	Sus scrofa CHD3-like protein mRNA, partial cds	CHD3	AK125928.1	1107	CHD3	chromodomain helicase DNA binding protein 3	0	-2.45	-2.39	-2.8	-2.45	-2.26	-2.46	-11.26	-11.26	-11.26	0
gi|190360622|ref|NM_001128462.1|	190360622	NM_001128462.1	Sus scrofa retinoic acid induced 14 (RAI14), mRNA	RAI14	NM_015577.2	26064	RAI14	retinoic acid induced 14	0	-2.83	-3.99	-3.35	-3.47	-4.75	-6.46	-12.57	-12.57	-12.57	0
gi|190360630|ref|NM_001128465.1|	190360630	NM_001128465.1	Sus scrofa secreted frizzled-related protein 4 (SFRP4), mRNA	SFRP4	NM_003014.3	6424	SFRP4	secreted frizzled-related protein 4	0	-2.2	-0.33	-0.67	-0.94	-3.88	-4.02	-4.21	-3.75	-6.1	0
gi|190360642|ref|NM_001128458.1|	190360642	NM_001128458.1	Sus scrofa AXL receptor tyrosine kinase (AXL), mRNA	AXL	NM_021913.3	558	AXL	AXL receptor tyrosine kinase	0	-0.22	0.1	-0.17	-0.04	-0.96	-2.09	-2.2	-3.52	-3.23	0
gi|190360646|ref|NM_001128455.1|	190360646	NM_001128455.1	Sus scrofa mighty (LOC100144621), mRNA	LOC100144621	NM_024595.2	79647	AKIRIN1	akirin 1	0	0.1	-0.3	-1.25	-2.9	-2.15	-0.91	-1.35	-9.47	-3.69	0
gi|190360658|ref|NM_001128471.1|	190360658	NM_001128471.1	Sus scrofa mesoderm specific transcript (MEST), mRNA	MEST	CR627364.1	4232	MEST	mesoderm specific transcript homolog (mouse)	0	-2.37	-2.25	-3.25	-4.06	-4.51	-13.22	-13.22	-13.22	-13.22	0
gi|190360680|ref|NM_001128461.1|	190360680	NM_001128461.1	Sus scrofa WD repeat domain 62 (WDR62), mRNA	WDR62	NM_001083961.1	284403	WDR62	WD repeat domain 62	0	0.02	-0.43	-0.75	-0.85	-3.42	-9.42	-9.42	-9.42	-9.42	0
gi|194018671|ref|NM_001129953.1|	194018671	NM_001129953.1	Sus scrofa dentin matrix acidic phosphoprotein (DMP1), mRNA	DMP1	NM_004407.3	1758	DMP1	dentin matrix acidic phosphoprotein 1	0	-0.63	-0.87	-0.12	0.17	-1.01	-1.49	-3.38	-1.89	-3.54	0
gi|194033446|ref|XM_001927265.1|	194033446	XM_001927265.1	PREDICTED: Sus scrofa similar to myasthenia gravis autoantigen gravin (LOC100152595), mRNA	LOC100152595	NM_005100.3	9590	AKAP12	A kinase (PRKA) anchor protein 12	0	-2.16	-1.52	-2.26	-2.17	-3.47	-4.84	-5.68	-6.57	-14.03	0
gi|194033456|ref|XM_001924731.1|	194033456	XM_001924731.1	PREDICTED: Sus scrofa similar to methylenetetrahydrofolate dehydrogenase (NADP+ dependent) 1-like (LOC100154722), partial mRNA	LOC100154722	BC008629.1	25902	MTHFD1L	methylenetetrahydrofolate dehydrogenase (NADP+ dependent) 1-like	0	-3.06	-4.26	-4.49	-11.25	-4.25	-11.25	-4.71	-11.25	-11.25	0
gi|194033477|ref|XM_001926239.1|	194033477	XM_001926239.1	PREDICTED: Sus scrofa similar to syntaxin 11 (LOC100152253), mRNA	LOC100152253	NM_003764.3	8676	STX11	syntaxin 11	0	2.58	2.6	2.75	1.45	-1.37	-7.37	-7.37	-1.51	-7.37	0
gi|194033483|ref|XM_001924263.1|	194033483	XM_001924263.1	PREDICTED: Sus scrofa similar to fucosidase, alpha-L- 2, plasma (LOC100154940), mRNA	LOC100154940	CR619981.1	2519	FUCA2	fucosidase, alpha-L- 2, plasma	0	0.72	0.45	0.02	-0.89	-1.6	-0.9	-3.01	-4.26	-2.88	0
gi|194033485|ref|XM_001924312.1|	194033485	XM_001924312.1	PREDICTED: Sus scrofa similar to peroxisomal biogenesis factor 3 (LOC100153726), mRNA	LOC100153726	AJ131389.1	8504	PEX3	peroxisomal biogenesis factor 3	0	0.9	0.33	0.16	0.29	-0.81	-1.22	-1.24	-3.83	-2.91	0
gi|194033493|ref|XM_001924291.1|	194033493	XM_001924291.1	PREDICTED: Sus scrofa similar to Vacuolar protein sorting-associated protein VTA1 homolog (LOC100155445), mRNA	LOC100155445	AK301376.1	51534	VTA1	Vps20-associated 1 homolog (S. cerevisiae)	0	0.32	0.42	0.13	0.12	-0.14	-0.4	-0.19	-1.13	-1.52	0
gi|194033556|ref|XM_001927696.1|	194033556	XM_001927696.1	PREDICTED: Sus scrofa similar to PDCL protein (LOC100153625), mRNA	LOC100153625	NM_005388.3	5082	PDCL	phosducin-like	0	-1.41	-1.01	-1.51	-1.62	-3.14	-3.13	-4.2	-3.06	-4.94	0
gi|194033594|ref|XM_001927795.1|	194033594	XM_001927795.1	PREDICTED: Sus scrofa heat shock 70kDa protein 5 (HSPA5), partial mRNA	HSPA5	NM_005347.3	3309	HSPA5	heat shock 70kDa protein 5 (glucose-regulated protein, 78kDa)	0	-4.14	-3.95	-4.47	-5.11	-2.67	-5.17	-4.65	-14.27	-14.27	0
gi|194033615|ref|XM_001924714.1|	194033615	XM_001924714.1	PREDICTED: Sus scrofa similar to Niban-like protein 1 (Protein FAM129B) (Meg-3) (LOC100155531), mRNA	LOC100155531	NM_001035534.1	64855	FAM129B	family with sequence similarity 129, member B	0	-1.54	-1.54	-1.41	-1.9	-3.16	-4.22	-4.63	-2.98	-5.11	0
gi|194033624|ref|XM_001924823.1|	194033624	XM_001924823.1	PREDICTED: Sus scrofa similar to syntaxin binding protein 1 (LOC100157141), mRNA	LOC100157141	NM_001032221.3	6812	STXBP1	syntaxin binding protein 1	0	-3.9	-1.59	-0.94	-2.02	-3.81	-10.39	-10.39	-10.39	-10.39	0
gi|194033677|ref|XM_001928828.1|	194033677	XM_001928828.1	PREDICTED: Sus scrofa similar to nucleoporin 188kDa (LOC100153500), mRNA	LOC100153500	NM_015354.1	23511	NUP188	nucleoporin 188kDa	0	-0.34	-0.28	-0.47	-0.84	-1.02	-2.92	-1.86	-1.24	-1.83	0
gi|194033679|ref|XM_001928922.1|	194033679	XM_001928922.1	PREDICTED: Sus scrofa similar to SH3-domain GRB2-like endophilin B2 (LOC100156344), mRNA	LOC100156344	NM_020145.2	56904	SH3GLB2	SH3-domain GRB2-like endophilin B2	0	0.89	0.81	1.19	0.49	-0.85	-1.48	-1.37	-0.45	-2.41	0
gi|194033683|ref|XM_001928962.1|	194033683	XM_001928962.1	PREDICTED: Sus scrofa similar to dolichyl pyrophosphate phosphatase 1 (predicted) (LOC100153919), mRNA	LOC100153919	NM_020438.4	57171	DOLPP1	dolichyl pyrophosphate phosphatase 1	0	-0.27	-0.53	-1.15	-1.21	-1.28	-1.27	-3.25	-3.5	-2.26	0
gi|194033714|ref|XM_001926627.1|	194033714	XM_001926627.1	PREDICTED: Sus scrofa similar to ionized calcium binding adapter molecule 2 (LOC100153127), partial mRNA	LOC100153127	AK314600.1	83543	AIF1L	allograft inflammatory factor 1-like	0	-1.17	0.46	-0.48	-1.09	-2.56	-9.56	-9.56	-9.56	-9.56	0
gi|194033747|ref|XM_001927557.1|	194033747	XM_001927557.1	PREDICTED: Sus scrofa similar to bromodomain containing protein 3 (LOC100152283), mRNA	LOC100152283	BC032124.2	8019	BRD3	bromodomain containing 3	0	-2.02	-1.68	-0.96	-2.1	-3.35	-10.67	-10.67	-10.67	-4.89	0
gi|194033751|ref|XM_001924525.1|	194033751	XM_001924525.1	PREDICTED: Sus scrofa similar to Putative ribosome-binding factor A, mitochondrial (LOC100158215), mRNA	LOC100158215	AF261073.2	79863	C18orf22	chromosome 18 open reading frame 22	0	-1.66	-1.52	-1.73	-1.84	-0.24	-2.46	-3.2	-3.54	-4.95	0
gi|194033772|ref|XM_001925455.1|	194033772	XM_001925455.1	PREDICTED: Sus scrofa similar to CTD (carboxy-terminal domain, RNA polymerase II, polypeptide A) phosphatase, subunit 1 (LOC100158188), mRNA	LOC100158188	NM_004715.3	9150	CTDP1	CTD (carboxy-terminal domain, RNA polymerase II, polypeptide A) phosphatase, subunit 1	0	-0.83	-0.66	-0.63	-1.47	-0.7	-0.87	-2.03	-2.37	-2.31	0
gi|194033834|ref|XM_001924991.1|	194033834	XM_001924991.1	PREDICTED: Sus scrofa similar to nipsnap homolog 3A (LOC100154081), mRNA	LOC100154081	BC045830.1	25934	NIPSNAP3A	nipsnap homolog 3A (C. elegans)	0	-1.14	-1.08	-1.1	-1.68	-3.51	-4.56	-3.39	-4.06	-3.8	0
gi|194033857|ref|XM_001926208.1|	194033857	XM_001926208.1	PREDICTED: Sus scrofa similar to zinc finger protein 462 (LOC100155740), mRNA	LOC100155740	NM_021224.4	58499	ZNF462	zinc finger protein 462	0	-1.26	-0.74	-0.92	-0.58	-0.71	-2.67	-1.53	-2.05	-3.45	0
gi|194033869|ref|XM_001924394.1|	194033869	XM_001924394.1	PREDICTED: Sus scrofa similar to inhibitor of kappa light polypeptide gene enhancer in B-cells, kinase complex-associated protein (LOC100157586), mRNA	LOC100157586	NM_003640.3	8518	IKBKAP	inhibitor of kappa light polypeptide gene enhancer in B-cells, kinase complex-associated protein	0	-2.14	-3.41	-2.41	-4.48	-3.04	-2.71	-10.63	-3.76	-10.63	0
gi|194033897|ref|XM_001926189.1|	194033897	XM_001926189.1	PREDICTED: Sus scrofa similar to Zinc finger protein 618 (LOC100157179), mRNA	LOC100157179	BC036039.1	114991	ZNF618	zinc finger protein 618	0	-2.01	-1.74	-1.31	-2.14	-4.36	-4.67	-4.82	-11.36	-4.98	0
gi|194033942|ref|XM_001925475.1|	194033942	XM_001925475.1	PREDICTED: Sus scrofa similar to cutA divalent cation tolerance homolog (LOC100156219), mRNA	LOC100156219	NR_024408.1	253039	LOC253039	hypothetical LOC253039	0	-0.48	-0.58	-1.31	-0.65	-1.09	-1.79	-2.53	-3.46	-2.4	0
gi|194033944|ref|XM_001925501.1|	194033944	XM_001925501.1	PREDICTED: Sus scrofa similar to proteasome (prosome, macropain) 26S subunit, non-ATPase, 5 (LOC100155007), mRNA	LOC100155007	AK291051.1	5711	PSMD5	proteasome (prosome, macropain) 26S subunit, non-ATPase, 5	0	-0.31	-0.21	-0.41	-0.81	-1.88	-2.53	-1.22	-2.56	-3.4	0
gi|194033952|ref|XM_001925654.1|	194033952	XM_001925654.1	PREDICTED: Sus scrofa similar to Centriolin (110 kDa centrosomal protein) (Centrosomal protein 1) (LOC100153004), mRNA	LOC100153004	BC137286.1	11064	CEP110	centrosomal protein 110kDa	0	-0.29	-0.16	0.12	0.15	-2.45	-2.14	-3.17	-4.03	-5.33	0
gi|194033956|ref|XM_001926015.1|	194033956	XM_001926015.1	PREDICTED: Sus scrofa similar to stomatin (LOC100154188), partial mRNA	LOC100154188	AK304449.1	2040	STOM	stomatin	0	-4.23	-4.13	-4.96	-3.82	-2.46	-3.8	-5.17	-11.71	-11.71	0
gi|194033974|ref|XM_001926411.1|	194033974	XM_001926411.1	PREDICTED: Sus scrofa similar to glucosaminyl (N-acetyl) transferase 1, core 2 (LOC100157004), mRNA	LOC100157004	NM_001097636.1	2650	GCNT1	glucosaminyl (N-acetyl) transferase 1, core 2 (beta-1,6-N-acetylglucosaminyltransferase)	0	-0.73	-0.89	-0.8	-2.09	-1.88	-2.04	-9.47	-3.61	-9.47	0
gi|194034011|ref|XM_001927812.1|	194034011	XM_001927812.1	PREDICTED: Sus scrofa similar to RUN and SH3 domain containing 2 (LOC100158062), mRNA	LOC100158062	NM_001135999.1	9853	RUSC2	RUN and SH3 domain containing 2	0	-0.26	0.23	0.28	-0.02	-1.01	-0.73	-1.24	-2.48	-3.03	0
gi|194034048|ref|XM_001928975.1|	194034048	XM_001928975.1	PREDICTED: Sus scrofa similar to RNA (guanine-9-) methyltransferase domain containing 3 (LOC100153604), mRNA	LOC100153604	NM_144964.2	158234	RG9MTD3	RNA (guanine-9-) methyltransferase domain containing 3	0	-1.53	-1.51	-0.77	-2.54	-2.11	-3.81	-3.38	-4.06	-9.92	0
gi|194034055|ref|XM_001924219.1|	194034055	XM_001924219.1	PREDICTED: Sus scrofa similar to aldehyde dehydrogenase 1B1 (LOC100156278), mRNA	LOC100156278	NM_000692.3	219	ALDH1B1	aldehyde dehydrogenase 1 family, member B1	0	-2.07	-3.98	-3.61	-1.8	-1.19	-9.37	-9.37	-9.37	-9.37	0
gi|194034076|ref|XM_001924892.1|	194034076	XM_001924892.1	PREDICTED: Sus scrofa similar to Acidic leucine-rich nuclear phosphoprotein 32 family member B (PHAPI2 protein) (Silver-stainable protein SSP29) (Acidic protein rich in leucines) (LOC100152263), partial mRNA	LOC100152263	AK313733.1	10541	ANP32B	acidic (leucine-rich) nuclear phosphoprotein 32 family, member B	0	1.55	0.57	-0.16	0.65	-0.62	0.11	-2.55	-0.76	-1.12	0
gi|194034098|ref|XM_001926594.1|	194034098	XM_001926594.1	PREDICTED: Sus scrofa similar to ring finger protein 20 (LOC100154259), mRNA	LOC100154259	AK314401.1	56254	RNF20	ring finger protein 20	0	-0.4	-1.24	-1.55	-1.06	-1.97	-2.04	-3.33	-5.23	-2.71	0
gi|194034109|ref|XM_001927571.1|	194034109	XM_001927571.1	PREDICTED: Sus scrofa similar to PC4 and SFRS1-interacting protein (Lens epithelium-derived growth factor) (LOC100157597), mRNA	LOC100157597	NM_001128217.1	11168	PSIP1	PC4 and SFRS1 interacting protein 1	0	-0.89	-1.63	-2.11	-1.31	-3.56	-3.35	-3.82	-4.64	-3.37	0
gi|194034126|ref|XM_001926626.1|	194034126	XM_001926626.1	PREDICTED: Sus scrofa similar to chromosome 9 open reading frame 123 (LOC100155846), mRNA	LOC100155846	AK292632.1	90871	C9orf123	chromosome 9 open reading frame 123	0	0.06	0.44	0.1	0.36	0.34	-0.61	-1.8	-3.17	-2.93	0
gi|194034150|ref|XM_001927070.1|	194034150	XM_001927070.1	PREDICTED: Sus scrofa solute carrier family 1 (neuronal/epithelial high affinity glutamate transporter, system Xag), member 1 (SLC1A1), mRNA	SLC1A1	AB008536.1	6505	SLC1A1	solute carrier family 1 (neuronal/epithelial high affinity glutamate transporter, system Xag), member 1	0	-0.8	-2.2	-3.27	-9.61	-9.61	-9.61	-9.61	-9.61	-9.61	0
gi|194034158|ref|XM_001927669.1|	194034158	XM_001927669.1	PREDICTED: Sus scrofa similar to KIAA0020 protein (LOC100152831), mRNA	LOC100152831	AK225953.1	9933	KIAA0020	KIAA0020	0	-0.03	-0.38	-0.13	-0.09	-0.44	-1.1	-1.23	-3.65	-5.58	0
gi|194034188|ref|XM_001924946.1|	194034188	XM_001924946.1	PREDICTED: Sus scrofa similar to SMC5 structural maintenance of chromosomes 5-like 1 (yeast) (predicted) (LOC100155547), partial mRNA	LOC100155547	NM_015110.3	23137	SMC5	structural maintenance of chromosomes 5	0	-0.83	-1.6	-2.1	-0.93	-1.24	-2.29	-3.03	-4.11	-11.56	0
gi|194034246|ref|XM_001927900.1|	194034246	XM_001927900.1	PREDICTED: Sus scrofa similar to WD repeat domain 89 (LOC100154239), mRNA	LOC100154239	AL136038.5	326300	HSPE1P2	heat shock 10kDa protein 1 (chaperonin 10) pseudogene 2	0	0.05	-0.61	0.01	0.05	-1.02	-9.61	-9.61	-2.15	-9.61	0
gi|194034395|ref|XM_001924581.1|	194034395	XM_001924581.1	PREDICTED: Sus scrofa similar to Leucine-rich repeat and fibronectin type-III domain-containing protein 5 (LOC100156782), mRNA	LOC100156782	NM_152447.3	145581	LRFN5	leucine rich repeat and fibronectin type III domain containing 5	0	-1.22	-3.23	-2.19	-1.58	-2.63	-9.95	-9.95	-9.95	-9.95	0
gi|194034404|ref|XM_001927120.1|	194034404	XM_001927120.1	PREDICTED: Sus scrofa similar to PRP39 pre-mRNA processing factor 39 homolog (LOC100153928), mRNA	LOC100153928	NM_017922.3	55015	PRPF39	PRP39 pre-mRNA processing factor 39 homolog (S. cerevisiae)	0	0.06	-0.23	-0.16	-0.48	-1.35	-1.67	-1.78	-1.77	-1.5	0
gi|194034434|ref|XM_001925498.1|	194034434	XM_001925498.1	PREDICTED: Sus scrofa similar to atlastin (LOC100158193), mRNA	LOC100158193	NM_001127713.1	51062	ATL1	atlastin GTPase 1	0	-2.35	-1.31	-1.86	-2.27	-3.42	-9.42	-9.42	-9.42	-9.42	0
gi|194034438|ref|XM_001925626.1|	194034438	XM_001925626.1	PREDICTED: Sus scrofa similar to ninein (LOC100157402), mRNA	LOC100157402	NM_020921.3	51199	NIN	ninein (GSK3B interacting protein)	0	-0.59	-0.67	-1.39	-0.81	-1.88	-2.36	-9.47	-9.47	-9.47	0
gi|194034443|ref|XM_001928249.1|	194034443	XM_001928249.1	PREDICTED: Sus scrofa similar to Trx-like protein (LOC100152543), mRNA	LOC100152543	BC050366.1	81542	TMX1	thioredoxin-related transmembrane protein 1	0	-1.67	-1.46	-1.4	-1.53	-1.34	-3.5	-2.91	-11.77	-11.77	0
gi|194034449|ref|XM_001926264.1|	194034449	XM_001926264.1	PREDICTED: Sus scrofa similar to Nidogen-2 precursor (NID-2) (Osteonidogen) (LOC100156994), mRNA	LOC100156994	AJ223500.1	22795	NID2	nidogen 2 (osteonidogen)	0	-0.2	-0.72	-0.36	-0.58	-1.64	-2.54	-4.8	-11.34	-11.34	0
gi|194034461|ref|XM_001926516.1|	194034461	XM_001926516.1	PREDICTED: Sus scrofa similar to protein tyrosine phosphatase-like (LOC100156599), mRNA	LOC100156599	AK098195.1	6815	STYX	serine/threonine/tyrosine interacting protein	0	-0.86	-0.63	-0.59	-1.05	-2.61	-1.78	-1.67	-2.34	-4.42	0
gi|194034463|ref|XM_001926549.1|	194034463	XM_001926549.1	PREDICTED: Sus scrofa similar to fermitin family homolog 2 (LOC100154173), mRNA	LOC100154173	EU979385.1	10979	FERMT2	fermitin family homolog 2 (Drosophila)	0	-0.01	0.05	-0.3	-0.49	-0.84	-1.06	-1.74	-3.22	-3.1	0
gi|194034465|ref|XM_001926658.1|	194034465	XM_001926658.1	PREDICTED: Sus scrofa similar to phosphatidic acid-preferring phospholipase A1 (LOC100153336), mRNA	LOC100153336	AB051492.1	80821	DDHD1	DDHD domain containing 1	0	-0.97	-1.78	-1.58	-1.62	-1.26	-2.48	-2.24	-10.58	-10.58	0
gi|194034473|ref|XM_001924194.1|	194034473	XM_001924194.1	PREDICTED: Sus scrofa similar to WD repeat and HMG-box DNA-binding protein 1 (Acidic nucleoplasmic DNA-binding protein 1) (And-1) (LOC100152808), mRNA	LOC100152808	NM_007086.2	11169	WDHD1	WD repeat and HMG-box DNA binding protein 1	0	-2.14	-1.04	-1.18	-1.22	-2.68	-11.15	-11.15	-4.28	-5.37	0
gi|194034484|ref|XM_001924759.1|	194034484	XM_001924759.1	PREDICTED: Sus scrofa hypothetical protein LOC100156037 (LOC100156037), partial mRNA	LOC100156037	NM_017799.3	54916	C14orf101	chromosome 14 open reading frame 101	0	0.31	0.32	0.72	0.86	-1	-1.21	-2.29	-2.66	-2.83	0
gi|194034491|ref|XM_001927783.1|	194034491	XM_001927783.1	PREDICTED: Sus scrofa similar to chromosome 14 open reading frame 108 (LOC100153219), mRNA	LOC100153219	NM_018229.3	55745	MUDENG	MU-2/AP1M2 domain containing, death-inducing	0	-1.09	-1.03	-1.44	-0.84	-1.37	-2.1	-1.37	-2.04	-2.94	0
gi|194034521|ref|XM_001926126.1|	194034521	XM_001926126.1	PREDICTED: Sus scrofa similar to Chondroitin sulfate synthase 1 (Glucuronosyl-N-acetylgalactosaminyl-proteoglycan 4-beta-N-acetylgalactosaminyltransferase 1) (N-acetylgalactosaminyl-proteoglycan 3-beta-glucuronosyltransferase 1) (Chondroitin glucuronyltra	LOC100156261	BC046247.1	22856	CHSY1	chondroitin sulfate synthase 1	0	-0.73	-1.08	-1.45	-2.11	-2.98	-4.46	-6.03	-5.96	-6.36	0
gi|194034539|ref|XM_001927513.1|	194034539	XM_001927513.1	PREDICTED: Sus scrofa similar to M-phase phosphoprotein 10 (LOC100153310), mRNA	LOC100153310	BC126389.1	10199	MPHOSPH10	M-phase phosphoprotein 10 (U3 small nucleolar ribonucleoprotein)	0	0.16	-0.12	-0.18	-0.58	0.01	-0.25	-1.31	-4.4	-3.06	0
gi|194034541|ref|XM_001925771.1|	194034541	XM_001925771.1	PREDICTED: Sus scrofa similar to ZO-1 MDCK (LOC100155340), mRNA	LOC100155340	AB370197.1	7082	TJP1	tight junction protein 1 (zona occludens 1)	0	-2.1	-1.38	-1.42	-1.28	-3.59	-3.07	-2.64	-10.18	-10.18	0
gi|194034592|ref|XM_001925373.1|	194034592	XM_001925373.1	PREDICTED: Sus scrofa similar to LisH domain and HEAT repeat-containing protein KIAA1468 (LOC100157030), mRNA	LOC100157030	NM_020854.3	57614	KIAA1468	KIAA1468	0	-0.61	-0.3	-0.57	0.06	-1.17	-1.61	-1.8	-2.09	-2.76	0
gi|194034630|ref|XM_001926608.1|	194034630	XM_001926608.1	PREDICTED: Sus scrofa similar to poly (ADP-ribose) polymerase family, member 16 (LOC100156241), mRNA	LOC100156241	NM_017851.4	54956	PARP16	poly (ADP-ribose) polymerase family, member 16	0	-0.43	-0.2	-0.98	-1.5	-1.49	-2.75	-2.9	-3.35	-3.91	0
gi|194034644|ref|XM_001929160.1|	194034644	XM_001929160.1	PREDICTED: Sus scrofa similar to UPF0464 protein C15orf44 (LOC100153401), mRNA	LOC100153401	BC007991.2	81556	C15orf44	chromosome 15 open reading frame 44	0	0.22	0.74	0.06	0.53	-0.9	-1.18	-1.45	-3.55	-2.61	0
gi|194034653|ref|XM_001925231.1|	194034653	XM_001925231.1	PREDICTED: Sus scrofa similar to TIPIN protein (LOC100153268), mRNA	LOC100153268	NM_017858.2	54962	TIPIN	TIMELESS interacting protein	0	-0.06	-1.12	-1.11	-0.81	-0.81	-1.97	-2.91	-3.58	-4.99	0
gi|194034709|ref|XM_001924730.1|	194034709	XM_001924730.1	PREDICTED: Sus scrofa similar to G protein beta subunit 5 short (LOC100157949), mRNA	LOC100157949	NM_006578.3	10681	GNB5	guanine nucleotide binding protein (G protein), beta 5	0	-1.46	-1.67	-2.54	-3.32	-2.88	-10.47	-10.47	-10.47	-4.69	0
gi|194034729|ref|XM_001924943.1|	194034729	XM_001924943.1	PREDICTED: Sus scrofa similar to transient receptor potential cation channel, subfamily M, member 7 (LOC100157945), mRNA	LOC100157945	NM_017672.3	54822	TRPM7	transient receptor potential cation channel, subfamily M, member 7	0	-0.83	-0.73	-0.88	-0.75	-1.61	-2.11	-2.91	-4.1	-5.01	0
gi|194034733|ref|XM_001927730.1|	194034733	XM_001927730.1	PREDICTED: Sus scrofa similar to Ubiquitin carboxyl-terminal hydrolase 8 (Ubiquitin thioesterase 8) (Ubiquitin-specific-processing protease 8) (Deubiquitinating enzyme 8) (hUBPy) (LOC100157546), mRNA	LOC100157546	NM_001128611.1	9101	USP8	ubiquitin specific peptidase 8	0	0.54	0.32	0.32	0.22	-0.84	-1.27	-1.83	-2.51	-2.99	0
gi|194034753|ref|XM_001928431.1|	194034753	XM_001928431.1	PREDICTED: Sus scrofa similar to DTW domain containing 1 (LOC100153076), mRNA	LOC100153076	AK290184.1	56986	DTWD1	DTW domain containing 1	0	0.3	0.13	-0.29	-0.82	-1.07	-1.03	-1.7	-1.87	-3.2	0
gi|194034776|ref|XM_001928952.1|	194034776	XM_001928952.1	PREDICTED: Sus scrofa similar to semaphorin 6D (LOC100157504), mRNA	LOC100157504	NM_153618.1	80031	SEMA6D	sema domain, transmembrane domain (TM), and cytoplasmic domain, (semaphorin) 6D	0	-1.79	-1.86	-1.93	-3.12	-4.6	-4.17	-11.6	-3.41	-4.8	0
gi|194034830|ref|XM_001925770.1|	194034830	XM_001925770.1	PREDICTED: Sus scrofa similar to WD repeat domain 76 (LOC100154588), mRNA	LOC100154588	NM_001167941.1	79968	WDR76	WD repeat domain 76	0	-0.47	0.36	-0.44	0.45	-1.04	-1.68	-1.61	-3.51	-2.85	0
gi|194034847|ref|XM_001925969.1|	194034847	XM_001925969.1	PREDICTED: Sus scrofa similar to microtubule-associated protein 1A (predicted) (LOC100157777), mRNA	LOC100157777	NM_002373.5	4130	MAP1A	microtubule-associated protein 1A	0	-1.66	0.1	-0.16	-1.26	-3.79	-5.5	-11.61	-11.61	-11.61	0
gi|194034892|ref|XM_001929418.1|	194034892	XM_001929418.1	PREDICTED: Sus scrofa similar to family with sequence similarity 82, member C (LOC100152553), mRNA	LOC100152553	AK092058.1	55177	FAM82A2	family with sequence similarity 82, member A2	0	-1.49	-1.3	-1.06	-1.65	-3.11	-4.75	-3.31	-2.87	-2.84	0
gi|194034896|ref|XM_001924578.1|	194034896	XM_001924578.1	PREDICTED: Sus scrofa similar to dermatan 4 sulfotransferase 1 (LOC100157245), mRNA	LOC100157245	BC053633.1	113189	CHST14	carbohydrate (N-acetylgalactosamine 4-0) sulfotransferase 14	0	0.98	0.62	0.52	0.31	-2.64	-2.61	-4.43	-2.57	-4.37	0
gi|194034933|ref|XM_001927442.1|	194034933	XM_001927442.1	PREDICTED: Sus scrofa thrombospondin 1 (THBS1), mRNA	THBS1	BC136470.1	7057	THBS1	thrombospondin 1	0	-1.28	-1.27	-1.85	-1.8	-2.73	-4.19	-4.98	-7.83	-13.69	0
gi|194034946|ref|XM_001924579.1|	194034946	XM_001924579.1	PREDICTED: Sus scrofa similar to Rho GTPase-activating protein 11A (Rho-type GTPase-activating protein 11A) (LOC100157473), mRNA	LOC100157473	AK316437.1	9824	ARHGAP11A	Rho GTPase activating protein 11A	0	-0.57	-0.31	-0.88	-1.54	-5.46	-6.35	-4.93	-12.46	-12.46	0
gi|194034959|ref|XM_001927036.1|	194034959	XM_001927036.1	PREDICTED: Sus scrofa similar to Collagen alpha-1(XII) chain (LOC100156689), mRNA	LOC100156689	NM_004370.5	1303	COL12A1	collagen, type XII, alpha 1	0	-0.12	-0.51	-1.29	-2.52	-6.79	-8.49	-8.48	-15.6	-15.6	0
gi|194034997|ref|XM_001928355.1|	194034997	XM_001928355.1	PREDICTED: Sus scrofa similar to RNA-binding protein MEX3C (RING finger and KH domain-containing protein 2) (RING finger protein 194) (LOC100154539), mRNA	LOC100154539	AY950679.1	51320	MEX3C	mex-3 homolog C (C. elegans)	0	-1.66	-1.2	-1.45	-1.36	-2.06	-2.57	-3.23	-5.32	-11.76	0
gi|194035041|ref|XM_001927251.1|	194035041	XM_001927251.1	PREDICTED: Sus scrofa similar to Probable E3 ubiquitin-protein ligase HERC1 (HECT domain and RCC1-like domain-containing protein 1) (p532) (p619) (LOC100153537), mRNA	LOC100153537	NM_003922.3	8925	HERC1	hect (homologous to the E6-AP (UBE3A) carboxyl terminus) domain and RCC1 (CHC1)-like domain (RLD) 1	0	-1	-0.84	-0.74	-0.79	-1.57	-1.42	-2.08	-2.28	-2.19	0
gi|194035091|ref|XM_001928873.1|	194035091	XM_001928873.1	PREDICTED: Sus scrofa similar to modulator of estrogen induced transcription (LOC100154227), mRNA	LOC100154227	NM_001013843.1	79811	SLTM	SAFB-like, transcription modulator	0	-0.6	-0.33	-0.67	-0.92	-1.32	-1.08	-1.29	-1.38	-1.67	0
gi|194035123|ref|XM_001926166.1|	194035123	XM_001926166.1	PREDICTED: Sus scrofa similar to activating signal cointegrator 1 complex subunit 3 (LOC100154453), mRNA	LOC100154453	NM_006828.2	10973	ASCC3	activating signal cointegrator 1 complex subunit 3	0	1.01	0.58	0.56	0.97	-0.1	-0.83	-1.25	-2.83	-2.73	0
gi|194035180|ref|XM_001925290.1|	194035180	XM_001925290.1	PREDICTED: Sus scrofa similar to sphingomyelin phosphodiesterase 2, neutral membrane (LOC100152155), mRNA	LOC100152155	BC000038.2	6610	SMPD2	sphingomyelin phosphodiesterase 2, neutral membrane (neutral sphingomyelinase)	0	-0.79	-0.53	-1.05	-1.29	-2.08	-2.24	-3.14	-1.9	-3.08	0
gi|194035184|ref|XM_001924626.1|	194035184	XM_001924626.1	PREDICTED: Sus scrofa similar to CD164 molecule, sialomucin (LOC100152548), mRNA	LOC100152548	NM_006016.4	8763	CD164	CD164 molecule, sialomucin	0	-0.38	-1.12	-1.22	-0.62	-0.62	-0.33	-1.64	-3.17	-2.48	0
gi|194035192|ref|XM_001924962.1|	194035192	XM_001924962.1	PREDICTED: Sus scrofa similar to tubulin, epsilon 1 (LOC100154975), mRNA	LOC100154975	NM_016262.4	51175	TUBE1	tubulin, epsilon 1	0	-1.49	-1.29	-2.18	-2.34	-5.21	-6.42	-12.53	-12.53	-12.53	0
gi|194035197|ref|XM_001925318.1|	194035197	XM_001925318.1	PREDICTED: Sus scrofa similar to histone deacetylase 2 (LOC100156170), mRNA	LOC100156170	BC148797.1	3066	HDAC2	histone deacetylase 2	0	-0.82	-0.99	-1.21	-1.77	-1.9	-2.35	-2.48	-2.73	-3.15	0
gi|194035227|ref|XM_001928768.1|	194035227	XM_001928768.1	PREDICTED: Sus scrofa similar to protease, serine, 35 (LOC100156168), mRNA	LOC100156168	BC037170.1	167681	PRSS35	protease, serine, 35	0	-0.71	-0.72	-1.64	-2.45	-14.5	-14.5	-14.5	-8.06	-14.5	0
gi|194035235|ref|XM_001924419.1|	194035235	XM_001924419.1	PREDICTED: Sus scrofa similar to Phosphoglucomutase 3 (LOC100156015), mRNA	LOC100156015	AK301867.1	5238	PGM3	phosphoglucomutase 3	0	0.51	0.55	0.84	0.58	-1.44	-2.36	-0.4	-2.37	-3.49	0
gi|194035237|ref|XM_001924449.1|	194035237	XM_001924449.1	PREDICTED: Sus scrofa similar to Protein dopey-1 (LOC100154796), mRNA	LOC100154796	AB029040.2	23033	DOPEY1	dopey family member 1	0	0	-0.11	0.1	-0.61	-1.48	-1.64	-2.6	-2.27	-1.48	0
gi|194035243|ref|XM_001927441.1|	194035243	XM_001927441.1	PREDICTED: Sus scrofa similar to trophoblast glycoprotein (LOC100158028), mRNA	LOC100158028	AK074790.1	7162	TPBG	trophoblast glycoprotein	0	-2.66	-2.5	-3.52	-3.19	-5.78	-5.15	-7.41	-7.08	-13.95	0
gi|194035245|ref|XM_001924870.1|	194035245	XM_001924870.1	PREDICTED: Sus scrofa similar to Inhibitor of Bruton tyrosine kinase (IBtk) (LOC100153597), mRNA	LOC100153597	BC113698.1	25998	IBTK	inhibitor of Bruton agammaglobulinemia tyrosine kinase	0	-0.9	-0.74	-1.8	-0.64	0.33	-2.04	-3.2	-3.64	-4.94	0
gi|194035251|ref|XM_001925673.1|	194035251	XM_001925673.1	PREDICTED: Sus scrofa similar to Dual specificity protein kinase TTK (Phosphotyrosine picked threonine-protein kinase) (PYT) (LOC100157649), mRNA	LOC100157649	NM_003318.4	7272	TTK	TTK protein kinase	0	-1.27	-1.76	-2.09	-2.18	-4.17	-10.75	-10.75	-10.75	-10.75	0
gi|194035288|ref|XM_001927095.1|	194035288	XM_001927095.1	PREDICTED: Sus scrofa similar to 5 nucleotidase, ecto (LOC100157995), mRNA	LOC100157995	NM_002526.2	4907	NT5E	5'-nucleotidase, ecto (CD73)	0	1.17	1.19	1.18	0.88	-1.6	-2.53	-2.75	-3.42	-4.72	0
gi|194035290|ref|XM_001927319.1|	194035290	XM_001927319.1	PREDICTED: Sus scrofa similar to sorting nexin 14 (LOC100156800), mRNA	LOC100156800	NM_153816.3	57231	SNX14	sorting nexin 14	0	0.38	0.03	-0.38	-0.1	-1.88	-2.28	-2.68	-3.35	-2.15	0
gi|194035296|ref|XM_001927594.1|	194035296	XM_001927594.1	PREDICTED: Sus scrofa similar to SYNCRIP protein, transcript variant 2 (LOC100154370), mRNA	LOC100154370	NM_001159674.1	10492	SYNCRIP	synaptotagmin binding, cytoplasmic RNA interacting protein	0	-0.23	-0.3	-0.21	-0.81	-1.27	-2.46	-1.82	-1.93	-1.27	0
gi|194035342|ref|XM_001928562.1|	194035342	XM_001928562.1	PREDICTED: Sus scrofa similar to Heme-binding protein 2 (Protein SOUL) (Placental protein 23) (PP23) (LOC100155860), mRNA	LOC100155860	AY427823.1	23593	HEBP2	heme binding protein 2	0	1.21	1.2	0.6	-0.33	-2.33	-2.96	-9.65	-3.21	-3.27	0
gi|194035410|ref|XM_001926931.1|	194035410	XM_001926931.1	PREDICTED: Sus scrofa similar to monooxygenase, DBH-like 1 (LOC100151998), mRNA	LOC100151998	NM_015529.2	26002	MOXD1	monooxygenase, DBH-like 1	0	-3.05	-4.26	-10.99	-10.99	-10.99	-10.99	-10.99	-10.99	-10.99	0
gi|194035414|ref|XM_001925502.1|	194035414	XM_001925502.1	PREDICTED: Sus scrofa similar to Mediator of RNA polymerase II transcription subunit 23 (Mediator complex subunit 23) (CRSP complex subunit 3) (Cofactor required for Sp1 transcriptional activation subunit 3) (Transcriptional coactivator CRSP130) (Vitamin	LOC100156032	AK315030.1	9439	MED23	mediator complex subunit 23	0	-2.38	-1.78	-2.05	-1.35	-2.29	-2.81	-3.5	-11.62	-11.62	0
gi|194035424|ref|XM_001926628.1|	194035424	XM_001926628.1	PREDICTED: Sus scrofa similar to protein tyrosine phosphatase, receptor type, K (LOC100153609), mRNA	LOC100153609	NM_002844.3	5796	PTPRK	protein tyrosine phosphatase, receptor type, K	0	-1.13	-0.35	-0.43	-0.67	-2.04	-3.48	-4.19	-3.72	-2.5	0
gi|194035430|ref|XM_001928661.1|	194035430	XM_001928661.1	PREDICTED: Sus scrofa similar to tRNA guanosine-2-O-methyltransferase TRM11 homolog (LOC100152782), mRNA	LOC100152782	NM_001031712.2	60487	TRMT11	tRNA methyltransferase 11 homolog (S. cerevisiae)	0	-0.51	-0.33	-0.73	-0.86	-0.85	-1.14	-1.57	-2.24	-2.99	0
gi|194035434|ref|XM_001926912.1|	194035434	XM_001926912.1	PREDICTED: Sus scrofa similar to hairy/enhancer-of-split related with YRPW motif 2 (LOC100152404), mRNA	LOC100152404	NM_012259.2	23493	HEY2	hairy/enhancer-of-split related with YRPW motif 2	0	-3.86	-1.8	-1.67	-1.52	-3.08	-3.56	-3.55	-10.67	-4.89	0
gi|194035475|ref|XM_001924744.1|	194035475	XM_001924744.1	PREDICTED: Sus scrofa similar to ZNF34 protein (LOC100155690), mRNA	LOC100155690	NM_030580.3	80778	ZNF34	zinc finger protein 34	0	-2.94	-2.26	-2.19	-1.86	-2.58	-3.64	-2.41	-4.31	-3.64	0
gi|194035487|ref|XM_001926028.1|	194035487	XM_001926028.1	PREDICTED: Sus scrofa similar to MGC159994 protein (LOC100152048), mRNA	LOC100152048	BC011377.1	9684	LRRC14	leucine rich repeat containing 14	0	-0.92	-0.92	-0.94	-1.13	-1.47	-1.38	-3.12	-4.21	-3.85	0
gi|194035515|ref|XM_001927683.1|	194035515	XM_001927683.1	PREDICTED: Sus scrofa similar to Uncharacterized aarF domain-containing protein kinase 5 (LOC100156475), mRNA	LOC100156475	BC101659.1	203054	ADCK5	aarF domain containing kinase 5	0	-0.51	-0.09	-0.57	-1.08	-1.24	-2.24	-2.97	-3.81	-5.3	0
gi|194035517|ref|XM_001925462.1|	194035517	XM_001925462.1	PREDICTED: Sus scrofa similar to cleavage and polyadenylation specificity factor 1 (LOC100152045), mRNA	LOC100152045	BC017232.2	29894	CPSF1	cleavage and polyadenylation specific factor 1, 160kDa	0	-0.9	-0.62	-0.59	-1.12	-1.2	-1.1	-2.53	-2.01	-2.14	0
gi|194035561|ref|XM_001924535.1|	194035561	XM_001924535.1	PREDICTED: Sus scrofa similar to differentiation enhancing factor 1 (LOC100153066), mRNA	LOC100153066	BC144493.1	50807	ASAP1	ArfGAP with SH3 domain, ankyrin repeat and PH domain 1	0	-0.99	-1.17	-1.62	-1.66	-2.16	-2.48	-6.08	-3.76	-3.66	0
gi|194035588|ref|XM_001924955.1|	194035588	XM_001924955.1	PREDICTED: Sus scrofa similar to KIAA0196 (LOC100152185), mRNA	LOC100152185	NM_014846.3	9897	KIAA0196	KIAA0196	0	-1.3	-0.55	-0.83	-1.29	-1.54	-1.37	-2.16	-2.63	-2.8	0
gi|194035592|ref|XM_001927531.1|	194035592	XM_001927531.1	PREDICTED: Sus scrofa similar to ring finger protein 139 (LOC100156613), mRNA	LOC100156613	NM_007218.3	11236	RNF139	ring finger protein 139	0	-0.78	-0.5	-0.47	-0.73	-1.01	-1.64	-0.97	-1.11	-2.89	0
gi|194035594|ref|XM_001925388.1|	194035594	XM_001925388.1	PREDICTED: Sus scrofa similar to TatD DNase domain containing 1 (LOC100156175), mRNA	LOC100156175	NM_001146160.1	83940	TATDN1	TatD DNase domain containing 1	0	-0.98	-1.16	-1.65	-1.31	-0.63	-1.6	-2.54	-2.47	-2.35	0
gi|194035596|ref|XM_001927635.1|	194035596	XM_001927635.1	PREDICTED: Sus scrofa similar to TRMT12 protein (LOC100155406), mRNA	LOC100155406	NM_017956.3	55039	TRMT12	tRNA methyltransferase 12 homolog (S. cerevisiae)	0	0	0.48	0.2	0.28	-0.48	-1.25	-2.69	-2.94	-1.85	0
gi|194035607|ref|XM_001928505.1|	194035607	XM_001928505.1	PREDICTED: Sus scrofa similar to Uncharacterized protein C8orf32 homolog (LOC100158199), mRNA	LOC100158199	NM_018024.1	55093	WDYHV1	WDYHV motif containing 1	0	-1.15	-0.88	-1.34	-1.29	-2.69	-4.29	-3.25	-5.21	-5.41	0
gi|194035611|ref|XM_001926114.1|	194035611	XM_001926114.1	PREDICTED: Sus scrofa similar to ATPase family, AAA domain containing 2 (LOC100157383), partial mRNA	LOC100157383	BC143716.1	29028	ATAD2	ATPase family, AAA domain containing 2	0	-0.94	-1.86	-2.88	-1.09	-3.42	-5.78	-11.88	-11.88	-11.88	0
gi|194035615|ref|XM_001928687.1|	194035615	XM_001928687.1	PREDICTED: Sus scrofa similar to LOC539014 protein (LOC100153348), mRNA	LOC100153348	BC067796.1	84933	C8orf76	chromosome 8 open reading frame 76	0	0.42	-0.25	-0.08	-0.76	-0.44	-1.28	-2.55	-1.63	-2.71	0
gi|194035621|ref|XM_001928830.1|	194035621	XM_001928830.1	PREDICTED: Sus scrofa similar to Der1-like domain family, member 1 (LOC100158198), mRNA	LOC100158198	NM_024295.4	79139	DERL1	Der1-like domain family, member 1	0	0.43	0.24	0.2	-0.1	-0.11	-0.36	-1.35	-3.68	-2.34	0
gi|194035631|ref|XM_001924325.1|	194035631	XM_001924325.1	PREDICTED: Sus scrofa similar to Collagen alpha-1(XIV) chain precursor (Undulin) (LOC100158059), mRNA	LOC100158059	BC140893.1	7373	COL14A1	collagen, type XIV, alpha 1	0	-2.2	-1.67	-2.42	-2.48	-3.03	-3.88	-4.55	-7.54	-6.62	0
gi|194035643|ref|XM_001927050.1|	194035643	XM_001927050.1	PREDICTED: Sus scrofa similar to Nephroblastoma overexpressed (LOC100154395), mRNA	LOC100154395	NM_002514.3	4856	NOV	nephroblastoma overexpressed gene	0	-1.35	-0.16	-1.41	-1.54	-3.67	-5.47	-5.49	-14.03	-14.03	0
gi|194035657|ref|XM_001928441.1|	194035657	XM_001928441.1	PREDICTED: Sus scrofa similar to Double-strand-break repair protein rad21 homolog (hHR21) (Nuclear matrix protein 1) (NXP-1) (SCC1 homolog) (LOC100154008), mRNA	LOC100154008	NM_006265.2	5885	RAD21	RAD21 homolog (S. pombe)	0	-2.07	-1.03	-0.83	-1.2	-2.15	-4.05	-3.54	-5.38	-5.13	0
gi|194035677|ref|XM_001925281.1|	194035677	XM_001925281.1	PREDICTED: Sus scrofa similar to Tetratricopeptide repeat protein 35 (TPR repeat protein 35) (LOC100155040), mRNA	LOC100155040	NM_014673.3	9694	TTC35	tetratricopeptide repeat domain 35	0	-0.87	-0.77	-0.37	-0.49	-0.85	-1.27	-1.12	-1.14	-1.42	0
gi|194035679|ref|XM_001925389.1|	194035679	XM_001925389.1	PREDICTED: Sus scrofa similar to Eukaryotic translation initiation factor 3 subunit E (Eukaryotic translation initiation factor 3 subunit 6) (eIF-3 p48) (eIF3e) (Viral integration site protein INT-6 homolog) (LOC100156671), mRNA	LOC100156671	BC000734.2	3646	EIF3E	eukaryotic translation initiation factor 3, subunit E	0	-0.58	-0.31	-0.24	-0.34	-1.28	-0.67	-1.47	-3.34	-2.87	0
gi|194035681|ref|XM_001924489.1|	194035681	XM_001924489.1	PREDICTED: Sus scrofa similar to CGI-30 protein (LOC100157715), mRNA	LOC100157715	NM_001077394.1	51611	DPH5	DPH5 homolog (S. cerevisiae)	0	0.03	0.04	-0.22	-1.16	-0.07	-0.79	-1.39	-2.48	-1.29	0
gi|194035693|ref|XM_001925021.1|	194035693	XM_001925021.1	PREDICTED: Sus scrofa similar to hippocampus abundant transcript 1 (LOC100153331), mRNA	LOC100153331	BC064409.1	64645	HIAT1	hippocampus abundant transcript 1	0	-0.23	0.28	0.26	-0.18	-1.23	-1.29	-1.42	-11.04	-11.04	0
gi|194035708|ref|XM_001927062.1|	194035708	XM_001927062.1	PREDICTED: Sus scrofa similar to polypyrimidine tract binding protein 2 (LOC100153327), mRNA	LOC100153327	AB051232.1	58155	PTBP2	polypyrimidine tract binding protein 2	0	-1.95	-1.76	-2.6	-2.36	-2.96	-6.1	-12.21	-6.35	-5.42	0
gi|194035712|ref|XM_001924706.1|	194035712	XM_001924706.1	PREDICTED: Sus scrofa similar to asparagine-linked glycosylation 14 homolog (LOC100157203), mRNA	LOC100157203	NM_144988.3	199857	ALG14	asparagine-linked glycosylation 14 homolog (S. cerevisiae)	0	0.16	0.17	-0.73	-1.13	-1.02	-4.23	-2.81	-2.15	-2.23	0
gi|194035722|ref|XM_001926997.1|	194035722	XM_001926997.1	PREDICTED: Sus scrofa similar to Rho GTPase activating protein 29 (LOC100152734), mRNA	LOC100152734	NM_004815.3	9411	ARHGAP29	Rho GTPase activating protein 29	0	-1.07	-0.6	-0.96	-0.97	-1.1	-1.71	-2.06	-1.15	-2.39	0
gi|194035725|ref|XM_001927565.1|	194035725	XM_001927565.1	PREDICTED: Sus scrofa similar to glomulin (LOC100153954), mRNA	LOC100153954	NM_053274.2	11146	GLMN	glomulin, FKBP associated protein	0	-0.59	-0.67	-0.85	-1.09	-2.5	-3.45	-3.46	-2.55	-2.31	0
gi|194035747|ref|XM_001926050.1|	194035747	XM_001926050.1	PREDICTED: Sus scrofa similar to breast cancer antiestrogen resistance 3 (LOC100153143), mRNA	LOC100153143	NM_003567.2	8412	BCAR3	breast cancer anti-estrogen resistance 3	0	-0.29	0.25	0.43	0.04	-0.68	-2.46	-2.15	-2.58	-2.36	0
gi|194035751|ref|XM_001929004.1|	194035751	XM_001929004.1	PREDICTED: Sus scrofa similar to HFM1 protein (LOC100156806), mRNA	LOC100156806	NM_001017975.3	164045	HFM1	HFM1, ATP-dependent DNA helicase homolog (S. cerevisiae)	0	-1.06	-1.21	-2.52	-0.71	-3.27	-10.87	-10.87	-10.87	-10.87	0
gi|194035753|ref|XM_001927135.1|	194035753	XM_001927135.1	PREDICTED: Sus scrofa similar to MGC152168 protein (LOC100152774), mRNA	LOC100152774	NM_201269.1	84146	ZNF644	zinc finger protein 644	0	-0.69	-0.65	-0.73	-0.74	-1.15	-1.93	-1.43	-1.81	-2.49	0
gi|194035786|ref|XM_001925492.1|	194035786	XM_001925492.1	PREDICTED: Sus scrofa similar to Heparan sulfate 2-O-sulfotransferase 1 (2-O-sulfotransferase) (2OST) (LOC100156232), mRNA	LOC100156232	NM_012262.3	9653	HS2ST1	heparan sulfate 2-O-sulfotransferase 1	0	-0.95	-0.93	-2.93	-1.9	-3.05	-4.18	-10.87	-4.42	-10.87	0
gi|194035792|ref|XM_001927522.1|	194035792	XM_001927522.1	PREDICTED: Sus scrofa similar to outer dense fiber of sperm tails 2-like (LOC100151813), partial mRNA	LOC100151813	AK302792.1	57489	ODF2L	outer dense fiber of sperm tails 2-like	0	0.46	-0.38	-1.03	-0.75	-1.54	-2.06	-2.95	-4.2	-3.69	0
gi|194035832|ref|XM_001928786.1|	194035832	XM_001928786.1	PREDICTED: Sus scrofa similar to Nicastrin (LOC100156098), mRNA	LOC100156098	NM_015331.2	23385	NCSTN	nicastrin	0	-1.22	-0.52	0.01	-1.13	-1.3	-2.37	-2.4	-4.33	-2.97	0
gi|194035846|ref|XM_001928960.1|	194035846	XM_001928960.1	PREDICTED: Sus scrofa similar to Astrocytic phosphoprotein PEA-15 (Phosphoprotein enriched in diabetes) (PED) (LOC100152480), mRNA	LOC100152480	NM_003768.3	8682	PEA15	phosphoprotein enriched in astrocytes 15	0	0.29	0.12	0.1	0.06	-0.44	-1.19	-1.34	-3.49	-2.41	0
gi|194035958|ref|XM_001929517.1|	194035958	XM_001929517.1	PREDICTED: Sus scrofa similar to platelet endothelial aggregation receptor 1 (LOC100156908), mRNA	LOC100156908	NM_001080471.1	375033	PEAR1	platelet endothelial aggregation receptor 1	0	-0.5	-0.22	-0.03	0.14	-0.72	-1.19	-2.59	-1.9	-3.34	0
gi|194035984|ref|XM_001925466.1|	194035984	XM_001925466.1	PREDICTED: Sus scrofa similar to CRABP2 protein (LOC100155151), mRNA	CRABP2					0	-0.14	-0.29	-0.64	-1.74	-5.34	-7.12	-7.27	-4.77	-4.85	0
gi|194035995|ref|XM_001924594.1|	194035995	XM_001924594.1	PREDICTED: Sus scrofa similar to chaperonin containing TCP1, subunit 3 (gamma) (LOC100154711), mRNA	LOC100154711	CR618496.1	7203	CCT3	chaperonin containing TCP1, subunit 3 (gamma)	0	-1.32	-1.02	-1.35	-1.49	-11.23	-5.13	-11.23	-11.23	-4.86	0
gi|194036015|ref|XM_001928005.1|	194036015	XM_001928005.1	PREDICTED: Sus scrofa bone gamma-carboxyglutamate (gla) protein (osteocalcin) (BGLAP), mRNA	BGLAP					0	1.51	2.48	0.68	0.27	-6.88	-6.88	-6.88	-1.02	-6.88	0
gi|194036030|ref|XM_001928495.1|	194036030	XM_001928495.1	PREDICTED: Sus scrofa similar to ataxin-1 ubiquitin-like interacting protein (LOC100155539), mRNA	LOC100155539	NM_020131.3	56893	UBQLN4	ubiquilin 4	0	0.22	-0.53	-0.31	-0.57	-1.15	-0.6	-1.46	-1.43	-0.72	0
gi|194036038|ref|XM_001928648.1|	194036038	XM_001928648.1	PREDICTED: Sus scrofa similar to UPF0469 protein KIAA0907 (LOC100157149), mRNA	LOC100157149	NM_014949.2	22889	KIAA0907	KIAA0907	0	1.13	0.81	0.59	0.37	-0.13	-0.52	-0.76	-2.08	-1.88	0
gi|194036055|ref|XM_001929111.1|	194036055	XM_001929111.1	PREDICTED: Sus scrofa similar to CDC-like kinase 2 (LOC100155149), mRNA	LOC100155149	NM_003993.2	1196	CLK2	CDC-like kinase 2	0	0.05	-0.06	0.4	0.08	-1.2	-1.12	-1.81	-1.91	-2.07	0
gi|194036068|ref|XM_001926844.1|	194036068	XM_001926844.1	PREDICTED: Sus scrofa similar to Thrombospondin-3 (LOC100155108), mRNA	LOC100155108	NM_007112.3	7059	THBS3	thrombospondin 3	0	-0.63	0.3	-0.43	-1.17	-2.51	-4	-5.03	-6.12	-6.78	0
gi|194036099|ref|XM_001929400.1|	194036099	XM_001929400.1	PREDICTED: Sus scrofa similar to SHC-transforming protein 1 (SH2 domain protein C1) (Src homology 2 domain-containing-transforming protein C1), transcript variant 2 (LOC100156321), mRNA	LOC100156321	NM_003029.4	6464	SHC1	SHC (Src homology 2 domain containing) transforming protein 1	0	-1.03	-1.52	-1.19	-1.23	-2.34	-3.5	-3.81	-3.89	-11.93	0
gi|194036101|ref|XM_001929371.1|	194036101	XM_001929371.1	PREDICTED: Sus scrofa similar to CDC28 protein kinase 1B (LOC100155110), mRNA	LOC100155110	BC070320.1	1163	CKS1B	CDC28 protein kinase regulatory subunit 1B	0	0.22	-0.41	-1.78	-0.49	-2.57	-4.92	-4.5	-4.17	-3.24	0
gi|194036118|ref|XM_001927231.1|	194036118	XM_001927231.1	PREDICTED: Sus scrofa similar to Ras-related protein Rab-13 (Cell growth-inhibiting gene 4 protein) (LOC100154707), mRNA	LOC100154707	AK291580.1	5872	RAB13	RAB13, member RAS oncogene family	0	0.68	-0.68	-1.66	0.51	-1.95	-2.47	-4.16	-4.83	-2.68	0
gi|194036124|ref|XM_001929506.1|	194036124	XM_001929506.1	PREDICTED: Sus scrofa similar to CREB-regulated transcription coactivator 2 (Transducer of regulated cAMP response element-binding protein 2) (TORC-2) (Transducer of CREB protein 2) (LOC100151904), mRNA	LOC100151904	AK223559.1	200186	CRTC2	CREB regulated transcription coactivator 2	0	-0.38	-0.14	-0.01	-0.08	-0.5	-0.63	-0.93	-2.49	-2.81	0
gi|194036134|ref|XM_001929587.1|	194036134	XM_001929587.1	PREDICTED: Sus scrofa similar to Atrial natriuretic peptide receptor A precursor (ANP-A) (ANPRA) (GC-A) (Guanylate cyclase) (NPR-A) (Atrial natriuretic peptide A-type receptor) (LOC100153508), mRNA	LOC100153508	NM_000906.3	4881	NPR1	natriuretic peptide receptor A/guanylate cyclase A (atrionatriuretic peptide receptor A)	0	0.44	0.43	0.49	0.11	-0.64	0.21	-2.11	-1.84	-1.14	0
gi|194036222|ref|XM_001929640.1|	194036222	XM_001929640.1	PREDICTED: Sus scrofa similar to Pogo transposable element with ZNF domain (LOC100155137), mRNA	LOC100155137	BC166671.1	23126	POGZ	pogo transposable element with ZNF domain	0	-0.97	-0.38	-0.48	-0.36	-1.65	-2.1	-1.97	-2.08	-2.07	0
gi|194036228|ref|XM_001929646.1|	194036228	XM_001929646.1	PREDICTED: Sus scrofa similar to regulatory factor X, 5, isoform 2 (predicted) (LOC100157968), mRNA	LOC100157968	NM_001025603.1	5993	RFX5	regulatory factor X, 5 (influences HLA class II expression)	0	-0.64	-0.19	-0.42	-0.72	-1.9	-1.64	-1.75	-0.87	-1.74	0
gi|194036238|ref|XM_001929652.1|	194036238	XM_001929652.1	PREDICTED: Sus scrofa similar to zinc finger protein 687 (predicted) (LOC100155570), mRNA	LOC100155570	NM_020832.1	57592	ZNF687	zinc finger protein 687	0	-0.43	-0.3	-0.86	-1.43	-2.43	-1.01	-3.22	-3.3	-3.96	0
gi|194036268|ref|XM_001929668.1|	194036268	XM_001929668.1	PREDICTED: Sus scrofa similar to SET domain, bifurcated 1 (LOC100157920), mRNA	SETDB1	NM_012432.3	9869	SETDB1	SET domain, bifurcated 1	0	-0.63	-1.03	-1.05	-1.56	-1.2	-3.21	-2.89	-2.76	-2.98	0
gi|194036270|ref|XM_001929667.1|	194036270	XM_001929667.1	PREDICTED: Sus scrofa similar to LAG1 longevity assurance 2 (LOC100156737), mRNA	LOC100156737	BC001357.2	29956	LASS2	LAG1 homolog, ceramide synthase 2	0	-0.88	-0.59	-0.43	-0.88	-2.01	-3.28	-3.19	-5.18	-5.25	0
gi|194036295|ref|XM_001926489.1|	194036295	XM_001926489.1	PREDICTED: Sus scrofa similar to Splicing factor 3b, subunit 4 (LOC100157814), mRNA	LOC100157814	NM_005850.3	10262	SF3B4	splicing factor 3b, subunit 4, 49kDa	0	-1.69	-1.09	-1.02	-1.48	-1.74	-2.79	-3.08	-3.97	-5.04	0
gi|194036315|ref|XM_001927860.1|	194036315	XM_001927860.1	PREDICTED: Sus scrofa similar to RNA-binding protein 8A (RNA-binding motif protein 8A) (Ribonucleoprotein RBM8A) (RNA-binding protein Y14) (Binder of OVCA1-1) (BOV-1) (LOC100156173), mRNA	LOC100156173	BC071577.1	9939	RBM8A	RNA binding motif protein 8A	0	-0.13	-0.11	-0.22	-0.18	0.29	-1.1	-1.44	-1.46	-1.28	0
gi|194036317|ref|XM_001927969.1|	194036317	XM_001927969.1	PREDICTED: Sus scrofa similar to Peroxisomal biogenesis factor 11B (LOC100153742), mRNA	LOC100153742	NM_003846.1	8799	PEX11B	peroxisomal biogenesis factor 11 beta	0	-1.44	-1.05	-1.47	-1.36	-0.95	-2.21	-2.14	-1.86	-2.44	0
gi|194036333|ref|XM_001928425.1|	194036333	XM_001928425.1	PREDICTED: Sus scrofa similar to B-cell CLL/lymphoma 9 (LOC100155378), mRNA	LOC100155378	NM_004326.2	607	BCL9	B-cell CLL/lymphoma 9	0	-0.09	-0.67	-1.38	-1.82	-4.13	-3.89	-3.92	-3.2	-2.02	0
gi|194036348|ref|XM_001928686.1|	194036348	XM_001928686.1	PREDICTED: Sus scrofa similar to vesicle trafficking protein sec22b (LOC100157002), mRNA	LOC100157002	BC001364.2	9554	SEC22B	SEC22 vesicle trafficking protein homolog B (S. cerevisiae)	0	-1.29	-1.36	-1.15	-1.79	-1.4	-2.54	-2.06	-3.26	-4.34	0
gi|194036350|ref|XM_001926399.1|	194036350	XM_001926399.1	PREDICTED: Sus scrofa similar to Neurogenic locus notch homolog protein 2 precursor (Notch 2) (hN2) (LOC100153369), partial mRNA	LOC100153369	NM_024408.2	4853	NOTCH2	Notch homolog 2 (Drosophila)	0	-4.47	-1.81	-1.87	-2.51	-3.95	-3.85	-10.54	-10.54	-10.54	0
gi|194036374|ref|XM_001929178.1|	194036374	XM_001929178.1	PREDICTED: Sus scrofa similar to WD repeat-containing protein 3 (LOC100154556), mRNA	LOC100154556	NM_006784.2	10885	WDR3	WD repeat domain 3	0	-1.81	-1.38	-1.82	-1.95	-2.13	-2.86	-3.14	-6.27	-12.13	0
gi|194036402|ref|XM_001927904.1|	194036402	XM_001927904.1	PREDICTED: Sus scrofa similar to solute carrier family 22, member 15 (LOC100153759), mRNA	LOC100153759	NM_018420.2	55356	SLC22A15	solute carrier family 22, member 15	0	-1.62	-0.91	-1.8	-0.99	-2.48	-10.81	-10.81	-4.95	-5.03	0
gi|194036406|ref|XM_001927918.1|	194036406	XM_001927918.1	PREDICTED: Sus scrofa calsequestrin (CASQ2), mRNA	CASQ2	NM_001232.3	845	CASQ2	calsequestrin 2 (cardiac muscle)	0	-0.02	0.08	0.34	0.56	1.28	-2.98	-3.55	-10.67	-10.67	0
gi|194036414|ref|XM_001927979.1|	194036414	XM_001927979.1	PREDICTED: Sus scrofa similar to tetraspan 2 (LOC100156161), mRNA	LOC100156161	BC021675.1	10100	TSPAN2	tetraspanin 2	0	-1.36	0.3	-0.15	-1.37	-11.37	-11.37	-11.37	-11.37	-11.37	0
gi|194036434|ref|XM_001926977.1|	194036434	XM_001926977.1	PREDICTED: Sus scrofa similar to Olfactomedin-like protein 3 precursor (HNOEL-iso) (hOLF44) (LOC100158055), mRNA	LOC100158055	NM_020190.2	56944	OLFML3	olfactomedin-like 3	0	-0.37	-0.57	-0.91	-1.4	-3.85	-3.73	-4.67	-3.23	-4.59	0
gi|194036442|ref|XM_001925127.1|	194036442	XM_001925127.1	PREDICTED: Sus scrofa similar to membrane associated guanylate kinase, WW and PDZ domain containing 3 (LOC100153223), mRNA	LOC100153223	NM_001142782.1	260425	MAGI3	membrane associated guanylate kinase, WW and PDZ domain containing 3	0	-1.24	-1.2	-1.36	-1.3	-3.83	-5.01	-4.58	-4.36	-4.68	0
gi|194036467|ref|XM_001928805.1|	194036467	XM_001928805.1	PREDICTED: Sus scrofa similar to methylosome protein 50 (LOC100156038), mRNA	LOC100156038	AK022860.1	79084	WDR77	WD repeat domain 77	0	0.2	-0.24	-0.41	-0.35	-0.12	-1.07	-0.82	-2.08	-0.96	0
gi|194036550|ref|XM_001926138.1|	194036550	XM_001926138.1	PREDICTED: Sus scrofa similar to protein x 013 (LOC100151851), mRNA	LOC100151851	BC066918.1	56900	TMEM167B	transmembrane protein 167B	0	-0.7	-0.68	-1.02	-1.02	-1.1	-1.16	-2.48	-2.8	-2.93	0
gi|194036571|ref|XM_001927806.1|	194036571	XM_001927806.1	PREDICTED: Sus scrofa similar to PRP38 pre-mRNA processing factor 38 (yeast) domain containing B (LOC100154667), mRNA	LOC100154667	BC144243.1	55119	PRPF38B	PRP38 pre-mRNA processing factor 38 (yeast) domain containing B	0	-0.53	-0.53	-0.56	-0.77	-1.22	-1.76	-2.21	-3.23	-2.54	0
gi|194036603|ref|XM_001929372.1|	194036603	XM_001929372.1	PREDICTED: Sus scrofa collagen type XI alpha 1 (COLL11A1), mRNA	COLL11A1	NM_001854.3	1301	COL11A1	collagen, type XI, alpha 1	0	-0.88	-1.02	-2.61	-2.85	-7.88	-8.9	-7.88	-8.91	-10.8	0
gi|194036611|ref|XM_001926603.1|	194036611	XM_001926603.1	PREDICTED: Sus scrofa similar to cysteine-rich secretory protein LCCL domain containing 1 (LOC100152961), mRNA	LOC100152961	NM_031461.4	83690	CRISPLD1	cysteine-rich secretory protein LCCL domain containing 1	0	-5.16	-4.71	-5.89	-6.5	-13.65	-13.65	-13.65	-13.65	-13.65	0
gi|194036623|ref|XM_001927665.1|	194036623	XM_001927665.1	PREDICTED: Sus scrofa similar to ubiquitin-conjugating enzyme E2W (putative) (LOC100152196), mRNA	LOC100152196	NM_018299.3	55284	UBE2W	ubiquitin-conjugating enzyme E2W (putative)	0	-1.46	-0.55	-0.4	-0.49	-0.36	-1.81	-1.33	-2.29	-2.92	0
gi|194036656|ref|XM_001928010.1|	194036656	XM_001928010.1	PREDICTED: Sus scrofa similar to guanine nucleotide-exchange protein (LOC100156861), mRNA	LOC100156861	NM_006421.3	10565	ARFGEF1	ADP-ribosylation factor guanine nucleotide-exchange factor 1(brefeldin A-inhibited)	0	0.48	0.62	0.43	0.38	-1.33	-1.9	-2.02	-2.11	-2.24	0
gi|194036658|ref|XM_001926004.1|	194036658	XM_001926004.1	PREDICTED: Sus scrofa similar to centrosome spindle pole associated protein 1 (LOC100152780), mRNA	LOC100152780	BC152993.1	79848	CSPP1	centrosome and spindle pole associated protein 1	0	-1.38	-1.47	-2.02	-2.21	-2.96	-3.86	-4.56	-5.98	-4.63	0
gi|194036681|ref|XM_001926703.1|	194036681	XM_001926703.1	PREDICTED: Sus scrofa similar to gamma-glutamyl hydrolase (LOC100154232), mRNA	LOC100154232	NM_003878.2	8836	GGH	gamma-glutamyl hydrolase (conjugase, folylpolygammaglutamyl hydrolase)	0	1.48	1.26	0.81	0.79	-1.24	-1.88	-2.44	0	-0.97	0
gi|194036698|ref|XM_001928463.1|	194036698	XM_001928463.1	PREDICTED: Sus scrofa similar to thymus high mobility group box protein TOX (LOC100155888), mRNA	LOC100155888	NM_014729.2	9760	TOX	thymocyte selection-associated high mobility group box	0	-1.99	-0.62	-0.29	-2.15	-5.18	-4.49	-11.18	-11.18	-11.18	0
gi|194036700|ref|XM_001927375.1|	194036700	XM_001927375.1	PREDICTED: Sus scrofa similar to neutral sphingomyelinase (N-SMase) activation associated factor (LOC100153039), mRNA	LOC100153039	BC041124.1	8439	NSMAF	neutral sphingomyelinase (N-SMase) activation associated factor	0	-0.26	-0.15	-0.19	0.22	-0.44	-4.01	-2.26	-2.93	-2.74	0
gi|194036707|ref|XM_001925806.1|	194036707	XM_001925806.1	PREDICTED: Sus scrofa hypothetical protein LOC100156516 (LOC100156516), mRNA	LOC100156516	BC024294.1	90362	FAM110B	family with sequence similarity 110, member B	0	-0.35	0.11	0.28	-0.75	-2.97	-10.56	-10.56	-10.56	-10.56	0
gi|194036726|ref|XM_001926250.1|	194036726	XM_001926250.1	PREDICTED: Sus scrofa similar to Tyrosine-protein kinase Lyn (LOC100152890), mRNA	LOC100152890	AK298677.1	4067	LYN	v-yes-1 Yamaguchi sarcoma viral related oncogene homolog	0	-0.31	0.14	-0.01	-0.51	-1.7	-1.02	-3.75	-3.85	-1.69	0
gi|194036728|ref|XM_001927876.1|	194036728	XM_001927876.1	PREDICTED: Sus scrofa similar to trimethylguanosine synthase homolog (LOC100157730), mRNA	LOC100157730	BC160105.1	96764	TGS1	trimethylguanosine synthase homolog (S. cerevisiae)	0	-0.79	-0.52	-0.27	-1.12	-2.17	-2.62	-2.88	-3.09	-5.04	0
gi|194036730|ref|XM_001927903.1|	194036730	XM_001927903.1	PREDICTED: Sus scrofa similar to Transmembrane protein 68 (LOC100156514), mRNA	LOC100156514	AL832935.1	137695	TMEM68	transmembrane protein 68	0	-1.1	-1.08	-1.41	-1.12	-2.17	-1.58	-2.15	-5.63	-3.9	0
gi|194036739|ref|XM_001927255.1|	194036739	XM_001927255.1	PREDICTED: Sus scrofa similar to Transcription elongation factor A (SII), 1 (LOC100157724), mRNA	LOC100157724	BC072460.1	6917	TCEA1	transcription elongation factor A (SII), 1	0	-2.33	-1.83	-1.65	-1.78	-1.9	-3	-3.86	-12.86	-6.06	0
gi|194036758|ref|XM_001924933.1|	194036758	XM_001924933.1	PREDICTED: Sus scrofa similar to minichromosome maintenance complex component 4 (LOC100156398), mRNA	LOC100156398	BC031061.1	4173	MCM4	minichromosome maintenance complex component 4	0	0.48	-0.12	-0.45	-0.84	-3.35	-4.48	-11.16	-11.16	-11.16	0
gi|194036776|ref|XM_001928004.1|	194036776	XM_001928004.1	PREDICTED: Sus scrofa similar to Uncharacterized protein C1orf112 homolog (LOC100155191), mRNA	LOC100155191	BC107169.1	55732	C1orf112	chromosome 1 open reading frame 112	0	-0.66	-1.24	-2.17	-1.84	-2.56	-2.82	-4.19	-3.54	-3.36	0
gi|194036844|ref|XM_001928256.1|	194036844	XM_001928256.1	PREDICTED: Sus scrofa similar to MGC166137 protein (LOC100152590), mRNA	LOC100152590	NM_145697.2	83540	NUF2	NUF2, NDC80 kinetochore complex component, homolog (S. cerevisiae)	0	-1.01	-2.41	-2.51	-1.3	-3.05	-4.09	-11.52	-11.52	-11.52	0
gi|194036851|ref|XM_001928643.1|	194036851	XM_001928643.1	PREDICTED: Sus scrofa similar to UDP-N-acteylglucosamine pyrophosphorylase 1 (LOC100156649), mRNA	LOC100156649	NM_003115.4	6675	UAP1	UDP-N-acteylglucosamine pyrophosphorylase 1	0	-0.74	-0.8	-0.94	-1.13	-1.21	-0.86	-1.16	-2.73	-1.64	0
gi|194036893|ref|XM_001927714.1|	194036893	XM_001927714.1	PREDICTED: Sus scrofa similar to Ufm1-conjugating enzyme 1 (Ubiquitin-fold modifier-conjugating enzyme 1) (LOC100157692), mRNA	LOC100157692	NM_016406.3	51506	UFC1	ubiquitin-fold modifier conjugating enzyme 1	0	0.67	0.86	0.32	0.29	-0.09	-0.8	-0.04	-0.74	-1.28	0
gi|194036938|ref|XM_001925805.1|	194036938	XM_001925805.1	PREDICTED: Sus scrofa similar to solute carrier family 25, member 32 (LOC100154544), mRNA	LOC100154544	NM_030780.3	81034	SLC25A32	solute carrier family 25, member 32	0	0.67	0.05	-0.25	-0.17	-1.84	-1.09	-3.11	-1.32	-1.54	0
gi|194036941|ref|XM_001925986.1|	194036941	XM_001925986.1	PREDICTED: Sus scrofa similar to collagen triple helix repeat containing 1 (LOC100152483), partial mRNA	LOC100152483	NM_138455.2	115908	CTHRC1	collagen triple helix repeat containing 1	0	-0.12	0.44	-0.22	-0.86	-10.71	-10.71	-10.71	-10.71	-10.71	0
gi|194036956|ref|XM_001924342.1|	194036956	XM_001924342.1	PREDICTED: Sus scrofa similar to ubiquitin protein ligase E3 component n-recognin 5 (LOC100157625), mRNA	LOC100157625	BC137234.1	51366	UBR5	ubiquitin protein ligase E3 component n-recognin 5	0	-1.93	-1.21	-1.99	-1.79	-1.92	-2.33	-2.06	-3.36	-3.72	0
gi|194036972|ref|XM_001927228.1|	194036972	XM_001927228.1	PREDICTED: Sus scrofa tyrosine 3-monooxygenase/tryptophan 5-monooxygenase activation protein, zeta polypeptide (YWHAZ), mRNA	YWHAZ	NM_145690.2	7534	YWHAZ	tyrosine 3-monooxygenase/tryptophan 5-monooxygenase activation protein, zeta polypeptide	0	-1.16	-1.75	-2.37	-1.97	-3.27	-4.34	-4.93	-3.78	-4.08	0
gi|194036974|ref|XM_001927747.1|	194036974	XM_001927747.1	PREDICTED: Sus scrofa similar to Polyadenylate-binding protein 1 (Poly(A)-binding protein 1) (PABP 1) (LOC100153958), mRNA	LOC100153958	BC015958.2	26986	PABPC1	poly(A) binding protein, cytoplasmic 1	0	-0.23	-0.29	-0.47	-0.52	-0.79	-1.16	-1.71	-6.39	-6.46	0
gi|194036998|ref|XM_001926069.1|	194036998	XM_001926069.1	PREDICTED: Sus scrofa similar to serine/threonine kinase 3 (STE20 homolog, yeast) (LOC100154354), mRNA	LOC100154354	NM_006281.2	6788	STK3	serine/threonine kinase 3 (STE20 homolog, yeast)	0	-1.99	-1.89	-9.47	-3.32	-9.47	-3.36	-9.47	-9.47	-9.47	0
gi|194037004|ref|XM_001928953.1|	194037004	XM_001928953.1	PREDICTED: Sus scrofa similar to Heat-responsive protein 12 (LOC100158002), mRNA	LOC100158002	BC012592.1	10247	HRSP12	heat-responsive protein 12	0	-2.27	-1.62	-1.88	-2.11	-1.18	-1.61	-2.65	-4.21	-4.51	0
gi|194037019|ref|XM_001926939.1|	194037019	XM_001926939.1	PREDICTED: Sus scrofa similar to syndecan 2 (LOC100152754), mRNA	LOC100152754	NM_002998.3	6383	SDC2	syndecan 2	0	0.57	-0.95	-1.78	-0.18	-2.33	-2.69	-4.25	-2.6	-2.42	0
gi|194037035|ref|XM_001926300.1|	194037035	XM_001926300.1	PREDICTED: Sus scrofa similar to dpy-19-like 4 (LOC100155024), mRNA	LOC100155024	BC126193.1	286148	DPY19L4	dpy-19-like 4 (C. elegans)	0	-0.99	-2.42	-1.82	-2.17	-3.83	-2.27	-2.71	-3.96	-10.83	0
gi|194037039|ref|XM_001926976.1|	194037039	XM_001926976.1	PREDICTED: Sus scrofa GTP binding protein overexpressed in skeletal muscle (GEM), mRNA	GEM	NM_181702.2	2669	GEM	GTP binding protein overexpressed in skeletal muscle	0	-2.57	-1.22	-1.52	-1.63	-4	-3.44	-3.89	-12	-12	0
gi|194037065|ref|XM_001927928.1|	194037065	XM_001927928.1	PREDICTED: Sus scrofa similar to Protein CBFA2T1 (Protein MTG8) (Protein ETO) (Eight twenty one protein) (Cyclin-D-related protein) (Zinc finger MYND domain-containing protein 2) (LOC100155449), mRNA	LOC100155449	NM_175634.1	862	RUNX1T1	runt-related transcription factor 1; translocated to, 1 (cyclin D-related)	0	0.4	-0.07	-0.24	0.15	-1.91	-2.11	-3.18	-4.86	-2.93	0
gi|194037092|ref|XM_001927347.1|	194037092	XM_001927347.1	PREDICTED: Sus scrofa similar to regulator of microtubule dynamics 1 (LOC100156087), mRNA	LOC100156087	AK000672.1	51115	FAM82B	family with sequence similarity 82, member B	0	0.59	0.51	1.11	1.09	0.05	-1.22	-0.79	-8.65	-8.65	0
gi|194037102|ref|XM_001924905.1|	194037102	XM_001924905.1	PREDICTED: Sus scrofa similar to E2F transcription factor 5 (LOC100157957), mRNA	LOC100157957	NM_001083588.1	1875	E2F5	E2F transcription factor 5, p130-binding	0	1.23	0.05	0.2	-0.1	-9.32	-9.32	-9.32	-2.87	-9.32	0
gi|194037142|ref|XM_001928532.1|	194037142	XM_001928532.1	PREDICTED: Sus scrofa similar to hairy/enhancer-of-split related with YRPW motif 1 (LOC100157952), mRNA	LOC100157952	NM_001040708.1	23462	HEY1	hairy/enhancer-of-split related with YRPW motif 1	0	-0.68	-0.2	-0.77	-0.45	-2.82	-1.47	-3.67	-2.86	-3.42	0
gi|194037185|ref|XM_001929112.1|	194037185	XM_001929112.1	PREDICTED: Sus scrofa similar to Phosphomannomutase 1 (PMM 1) (PMMH-22) (LOC100151790), mRNA	LOC100151790	NM_002676.2	5372	PMM1	phosphomannomutase 1	0	0.85	-0.63	-0.34	-1.09	-1.84	-3.2	-2.6	-3.85	-3.93	0
gi|194037193|ref|XM_001929169.1|	194037193	XM_001929169.1	PREDICTED: Sus scrofa similar to Ran GTPase activating protein 1 (LOC100153811), mRNA	LOC100153811	AK303524.1	5905	RANGAP1	Ran GTPase activating protein 1	0	-0.06	-0.25	-0.28	-0.53	-1.19	-1.47	-2.11	-1.24	-1.22	0
gi|194037198|ref|XM_001929213.1|	194037198	XM_001929213.1	PREDICTED: Sus scrofa similar to Histone acetyltransferase p300 (E1A-associated protein p300) (LOC100156226), mRNA	LOC100156226	BC172280.1	2033	EP300	E1A binding protein p300	0	-0.45	-0.41	-0.55	-0.61	-1.55	-0.52	-1.47	-1.19	-1.49	0
gi|194037208|ref|XM_001928476.1|	194037208	XM_001928476.1	PREDICTED: Sus scrofa similar to Mitogen-activated protein kinase kinase kinase 7-interacting protein 1 (TGF-beta-activated kinase 1-binding protein 1) (TAK1-binding protein 1) (LOC100153785), mRNA	LOC100153785	AK316004.1	10454	TAB1	TGF-beta activated kinase 1/MAP3K7 binding protein 1	0	-0.21	-0.13	-0.44	-0.49	-0.38	-0.9	-1.75	-2.96	-2.41	0
gi|194037272|ref|XM_001928278.1|	194037272	XM_001928278.1	PREDICTED: Sus scrofa similar to cryptochrome 1 (photolyase-like) (LOC100153282), mRNA	LOC100153282	NM_004075.3	1407	CRY1	cryptochrome 1 (photolyase-like)	0	-1.21	-0.45	-0.82	-1.21	-1.69	-1.94	-3.35	-2.92	-1.48	0
gi|194037337|ref|XM_001927256.1|	194037337	XM_001927256.1	PREDICTED: Sus scrofa similar to Spryd3 protein (LOC100154029), partial mRNA	LOC100154029	BC136312.1	84926	SPRYD3	SPRY domain containing 3	0	-0.22	0.18	0.28	0.09	-0.67	-1.75	-2.2	-2.28	-2.21	0
gi|194037339|ref|XM_001924386.1|	194037339	XM_001924386.1	PREDICTED: Sus scrofa retinoic acid receptor, alpha (RARA), mRNA	RARA	AK316259.1	5916	RARG	retinoic acid receptor, gamma	0	-3.38	-4.67	-3.59	-3.3	-4.67	-2.57	-10.67	-10.67	-10.67	0
gi|194037341|ref|XM_001924619.1|	194037341	XM_001924619.1	PREDICTED: Sus scrofa similar to cysteine sulfinic acid decarboxylase (LOC100157951), mRNA	LOC100157951	NM_015989.4	51380	CSAD	cysteine sulfinic acid decarboxylase	0	-1.3	-0.77	-0.66	-1.7	-3.18	-2.07	-2.06	-10.18	-10.18	0
gi|194037363|ref|XM_001926885.1|	194037363	XM_001926885.1	PREDICTED: Sus scrofa transcription factor Sp1 (LOC396575), mRNA	LOC396575	NM_138473.2	6667	SP1	Sp1 transcription factor	0	0.42	0.25	0.84	0.55	-0.31	-0.43	-0.59	-1.88	-4.07	0
gi|194037367|ref|XM_001927219.1|	194037367	XM_001927219.1	PREDICTED: Sus scrofa similar to single-strand selective monofunctional uracil DNA glycosylase (LOC100153912), mRNA	LOC100153912	AK290274.1	23583	SMUG1	single-strand-selective monofunctional uracil-DNA glycosylase 1	0	-1	-0.67	-0.62	-0.59	-1.96	-2.28	-3.17	-2.72	-3.04	0
gi|194037369|ref|XM_001925128.1|	194037369	XM_001925128.1	PREDICTED: Sus scrofa similar to homeo box C4 (mapped) (LOC100154759), mRNA	LOC100154759	NM_014620.4	3221	HOXC4	homeobox C4	0	-1.59	-1.53	-3.01	-2.76	-4.85	-6.75	-12.86	-12.86	-12.86	0
gi|194037372|ref|XM_001927549.1|	194037372	XM_001927549.1	PREDICTED: Sus scrofa similar to Coatomer subunit zeta-1 (Zeta-1-coat protein) (Zeta-1 COP) (LOC100156765), mRNA	LOC100156765	AK025956.1	22818	COPZ1	coatomer protein complex, subunit zeta 1	0	0.22	0.13	0.27	-0.69	-1.12	-1.72	-1.54	-2.98	-6.82	0
gi|194037379|ref|XM_001925252.1|	194037379	XM_001925252.1	PREDICTED: Sus scrofa similar to integrin, alpha 5 (fibronectin receptor, alpha polypeptide) (LOC100155091), mRNA	LOC100155091	NM_002205.2	3678	ITGA5	integrin, alpha 5 (fibronectin receptor, alpha polypeptide)	0	-1.84	-1.1	-1.56	-2.05	-3.33	-4.27	-5.76	-5.76	-6.24	0
gi|194037499|ref|XM_001928879.1|	194037499	XM_001928879.1	PREDICTED: Sus scrofa similar to J-domain protein Jiv (LOC100151876), mRNA	LOC100151876	NM_032364.5	85406	DNAJC14	DnaJ (Hsp40) homolog, subfamily C, member 14	0	0.88	0.84	0.9	0.34	-0.23	-0.56	-0.34	-3.25	-2.14	0
gi|194037501|ref|XM_001928838.1|	194037501	XM_001928838.1	PREDICTED: Sus scrofa similar to Ormdl2 protein (LOC100157122), mRNA	LOC100157122	NM_014182.4	29095	ORMDL2	ORM1-like 2 (S. cerevisiae)	0	-0.28	-0.33	-0.17	-0.42	-1.72	-2.17	-2.85	-4.1	-2.86	0
gi|194037509|ref|XM_001928954.1|	194037509	XM_001928954.1	PREDICTED: Sus scrofa similar to cyclin-dependent kinase-2 alpha, transcript variant 1 (LOC100154715), mRNA	LOC100154715	NM_001798.3	1017	CDK2	cyclin-dependent kinase 2	0	1.31	0.2	0.29	0.76	-9.42	-2.31	-9.42	-9.42	-9.42	0
gi|194037515|ref|XM_001929065.1|	194037515	XM_001929065.1	PREDICTED: Sus scrofa similar to LOC507466 protein (LOC100152308), mRNA	LOC100152308	NM_032786.1	84872	ZC3H10	zinc finger CCCH-type containing 10	0	-0.26	0.3	0.15	0.13	0.4	-0.25	-2.07	-3.16	-3.82	0
gi|194037543|ref|XM_001929293.1|	194037543	XM_001929293.1	PREDICTED: Sus scrofa similar to PABP1-DEPENDENT POLY(A)-SPECIFIC RIBONUCLEASE SUBUNIT PAN2 (LOC100153107), mRNA	LOC100153107	NM_014871.4	9924	PAN2	PAN2 poly(A) specific ribonuclease subunit homolog (S. cerevisiae)	0	-0.68	-0.35	-0.07	-0.7	-0.85	-1.86	-1.98	-0.97	-1.4	0
gi|194037573|ref|XM_001929488.1|	194037573	XM_001929488.1	PREDICTED: Sus scrofa similar to NADH dehydrogenase [ubiquinone] 1 alpha subcomplex subunit 4-like 2 (LOC100156288), mRNA	LOC100156288	AF164796.1	56901	NDUFA4L2	NADH dehydrogenase (ubiquinone) 1 alpha subcomplex, 4-like 2	0	-1.66	-1.29	-0.94	-0.68	-0.8	-1.92	-2.07	-4.75	-4.83	0
gi|194037603|ref|XM_001927821.1|	194037603	XM_001927821.1	PREDICTED: Sus scrofa similar to TIP120 protein (LOC100154069), mRNA	LOC100154069	NM_018448.3	55832	CAND1	cullin-associated and neddylation-dissociated 1	0	-1.39	-1.9	-1.87	-1.81	-2.98	-3.91	-3.84	-4.58	-5.28	0
gi|194037661|ref|XM_001928816.1|	194037661	XM_001928816.1	PREDICTED: Sus scrofa similar to growth arrest-specific 2 like 3 (LOC100154381), mRNA	LOC100154381	AK315189.1	283431	GAS2L3	growth arrest-specific 2 like 3	0	-4.02	-3.52	-2.44	-2.37	-9.52	-9.52	-9.52	-9.52	-9.52	0
gi|194037682|ref|XM_001927000.1|	194037682	XM_001927000.1	PREDICTED: Sus scrofa similar to lumican (LOC100152607), mRNA	LOC100152607	NM_002345.3	4060	LUM	lumican	0	-0.88	-1.26	-2.23	-1.92	-2.04	-2.69	-3.56	-14	-8.22	0
gi|194037684|ref|XM_001927128.1|	194037684	XM_001927128.1	PREDICTED: Sus scrofa similar to keratan sulfate proteoglycan core protein 37A (LOC100157843), mRNA	LOC100157843	AF205403.1	11081	KERA	keratocan	0	1.4	1.43	0.04	-0.42	-3.01	-4.42	-4.81	-5.89	-6.56	0
gi|194037699|ref|XM_001928207.1|	194037699	XM_001928207.1	PREDICTED: Sus scrofa similar to centrosomal protein 290kDa (LOC100155832), mRNA	LOC100155832	BC156462.1	80184	CEP290	centrosomal protein 290kDa	0	0.49	0.11	-0.18	-0.37	-1.67	-1.89	-3.47	-4.73	-4.8	0
gi|194037705|ref|XM_001924362.1|	194037705	XM_001924362.1	PREDICTED: Sus scrofa similar to myogenic factor-5 (LOC100153269), mRNA	LOC100153269	NM_005593.2	4617	MYF5	myogenic factor 5	0	0.41	0.13	0.01	-0.49	-3.69	-5.85	-4.42	-4.6	-6.17	0
gi|194037715|ref|XM_001927280.1|	194037715	XM_001927280.1	PREDICTED: Sus scrofa similar to Cysteine and glycine-rich protein 2 (Cysteine-rich protein 2) (CRP2) (Smooth muscle cell LIM protein) (SmLIM) (LIM domain only protein 5) (LOC100153630), mRNA	LOC100153630	NM_001321.1	1466	CSRP2	cysteine and glycine-rich protein 2	0	0.01	-0.49	-0.71	-1	-2.44	-3.13	-3.02	-2.69	-5.34	0
gi|194037797|ref|XM_001925445.1|	194037797	XM_001925445.1	PREDICTED: Sus scrofa similar to KIAA0528 (LOC100153844), partial mRNA	LOC100153844	BC053885.1	9847	KIAA0528	KIAA0528	0	0.49	0.65	0.73	1.02	0.1	-0.68	-2.28	-4.65	-4.72	0
gi|194037857|ref|XM_001927835.1|	194037857	XM_001927835.1	PREDICTED: Sus scrofa hypothetical protein LOC100152915 (LOC100152915), mRNA	LOC100152915	AK302847.1	57494	RIMKLB	ribosomal modification protein rimK-like family member B	0	-2.41	-1.95	-2.28	-2.82	-5.85	-11.85	-5.31	-11.85	-11.85	0
gi|194037874|ref|XM_001925758.1|	194037874	XM_001925758.1	PREDICTED: Sus scrofa similar to leprecan-like 2 (LOC100156539), mRNA	LOC100156539	BC157128.1	10536	LEPREL2	leprecan-like 2	0	-1.94	-2.09	-3.92	-2.64	-4.09	-4.56	-10.67	-10.67	-10.67	0
gi|194037877|ref|XM_001928347.1|	194037877	XM_001928347.1	PREDICTED: Sus scrofa similar to cell division cycle associated 3 (LOC100153312), mRNA	LOC100153312	BC036512.1	83461	CDCA3	cell division cycle associated 3	0	0.02	-0.5	-0.33	-1.16	-4.37	-10.37	-10.37	-3.5	-10.37	0
gi|194037879|ref|XM_001925784.1|	194037879	XM_001925784.1	PREDICTED: Sus scrofa similar to Ubiquitin isopeptidase T (LOC100155342), mRNA	LOC100155342	NM_001098536.1	8078	USP5	ubiquitin specific peptidase 5 (isopeptidase T)	0	-1.25	-0.6	-0.91	-0.93	-0.25	-2.32	-2.7	-2.25	-2.86	0
gi|194037889|ref|XM_001928702.1|	194037889	XM_001928702.1	PREDICTED: Sus scrofa similar to Uncharacterized protein C12orf4 (LOC100153309), mRNA	LOC100153309	BC016908.1	57102	C12orf4	chromosome 12 open reading frame 4	0	-0.17	-0.3	-0.23	-0.74	-1.43	-1.41	-2.4	-1.13	-2.27	0
gi|194037909|ref|XM_001924188.1|	194037909	XM_001924188.1	PREDICTED: Sus scrofa similar to F3/F11/Contactin (LOC100152764), partial mRNA	LOC100152764	NM_175038.1	1272	CNTN1	contactin 1	0	-1.98	-2.7	-4.16	-3.02	-3.92	-9.92	-9.92	-9.92	-9.92	0
gi|194037926|ref|XM_001928516.1|	194037926	XM_001928516.1	PREDICTED: Sus scrofa similar to ribonuclease P 40kDa subunit (LOC100152063), mRNA	LOC100152063	NM_006638.2	10799	RPP40	ribonuclease P/MRP 40kDa subunit	0	-0.99	-0.83	-1.28	-1.58	-1.07	-2.08	-2.73	-2.98	-2.74	0
gi|194037930|ref|XM_001928852.1|	194037930	XM_001928852.1	PREDICTED: Sus scrofa similar to PX domain-containing protein C6orf145 (LOC100154877), mRNA	LOC100154877	BC056908.1	221749	C6orf145	chromosome 6 open reading frame 145	0	0.06	-0.02	0.2	0.27	-0.5	-1.51	-2.48	-2.84	-2.61	0
gi|194037944|ref|XM_001924408.1|	194037944	XM_001924408.1	PREDICTED: Sus scrofa similar to Valacyclovir hydrolase precursor (VACVase) (Biphenyl hydrolase-like protein) (Biphenyl hydrolase-related protein) (Bph-rp) (Breast epithelial mucin-associated antigen) (MCNAA) (LOC100154272), mRNA	LOC100154272	NR_026650.1	670	BPHL	biphenyl hydrolase-like (serine hydrolase)	0	-1.93	-0.79	-0.6	-1.51	-3.07	-2.97	-4.13	-2.62	-3.55	0
gi|194037952|ref|XM_001924515.1|	194037952	XM_001924515.1	PREDICTED: Sus scrofa similar to WRNIP1 protein (LOC100155921), mRNA	LOC100155921	NM_020135.2	56897	WRNIP1	Werner helicase interacting protein 1	0	0.09	0.13	0.14	0.14	-0.72	-1.21	-1.44	-0.46	-1.28	0
gi|194037997|ref|XM_001926200.1|	194037997	XM_001926200.1	PREDICTED: Sus scrofa similar to PAK1IP1 protein (LOC100156606), mRNA	LOC100156606	NM_017906.2	55003	PAK1IP1	PAK1 interacting protein 1	0	-0.3	-0.43	-0.45	-0.55	0.26	-0.84	-1.09	-1.2	-1.42	0
gi|194038009|ref|XM_001927352.1|	194038009	XM_001927352.1	PREDICTED: Sus scrofa similar to neural precursor cell expressed, developmentally down-regulated 9 (LOC100154178), mRNA	LOC100154178	NM_001142393.1	4739	NEDD9	neural precursor cell expressed, developmentally down-regulated 9	0	-0.46	-0.4	-0.51	-0.25	-1.86	-1.96	-3.48	-4.37	-6.04	0
gi|194038062|ref|XM_001927844.1|	194038062	XM_001927844.1	PREDICTED: Sus scrofa similar to amine oxidase (flavin containing) domain 1 (LOC100158047), mRNA	LOC100158047	NM_153042.3	221656	KDM1B	lysine (K)-specific demethylase 1B	0	-0.88	0.03	0.12	-0.75	-2.1	-2.07	-2.5	-1.58	-2	0
gi|194038066|ref|XM_001927909.1|	194038066	XM_001927909.1	PREDICTED: Sus scrofa similar to DEK oncogene, transcript variant 1 (LOC100156871), mRNA	LOC100156871	NM_001134709.1	7913	DEK	DEK oncogene	0	-0.7	-0.77	-1.09	-0.83	-1.79	-1.14	-1.67	-1.02	-1.5	0
gi|194038104|ref|XM_001925531.1|	194038104	XM_001925531.1	PREDICTED: Sus scrofa similar to CDC42-binding protein kinase beta (LOC100156588), mRNA	LOC100156588	NM_006035.3	9578	CDC42BPB	CDC42 binding protein kinase beta (DMPK-like)	0	0.66	0.93	0.93	0.66	-0.27	-0.97	-0.98	-2.4	-3.35	0
gi|194038212|ref|XM_001927641.1|	194038212	XM_001927641.1	PREDICTED: Sus scrofa similar to Leucine-rich repeat transmembrane protein FLRT2 precursor (Fibronectin-like domain-containing leucine-rich transmembrane protein 2) (LOC100151812), mRNA	LOC100151812	AL132641.3	23768	FLRT2	fibronectin leucine rich transmembrane protein 2	0	-2.41	-2.22	-1.83	-1.8	-4.95	-5.43	-11.54	-4.67	-5.76	0
gi|194038225|ref|XM_001926546.1|	194038225	XM_001926546.1	PREDICTED: Sus scrofa similar to zinc finger CCCH-type containing 14 (LOC100157303), mRNA	LOC100157303	NM_024824.4	79882	ZC3H14	zinc finger CCCH-type containing 14	0	-0.18	0.23	-1.1	-1.8	-1.94	-1.81	-2.53	-6.38	-2.87	0
gi|194038249|ref|XM_001926231.1|	194038249	XM_001926231.1	PREDICTED: Sus scrofa similar to ribosomal protein S6 kinase, 90kDa, polypeptide 5 (LOC100152046), mRNA	LOC100152046	AK295266.1	9252	RPS6KA5	ribosomal protein S6 kinase, 90kDa, polypeptide 5	0	-0.96	-0.81	-1.03	-0.79	-2.01	-2.27	-3.89	-4.56	-4.42	0
gi|194038273|ref|XM_001926825.1|	194038273	XM_001926825.1	PREDICTED: Sus scrofa similar to thyroid hormone receptor interactor 11 (LOC100154452), mRNA	LOC100154452	NM_004239.2	9321	TRIP11	thyroid hormone receptor interactor 11	0	-0.68	-0.75	-0.5	-0.59	-0.9	-1.57	-1.29	-4.2	-4.69	0
gi|194038285|ref|XM_001924255.1|	194038285	XM_001924255.1	PREDICTED: Sus scrofa similar to LOC510412 protein (LOC100155955), partial mRNA	LOC100155955	AK303789.1	9950	GOLGA5	golgin A5	0	-0.58	-0.09	-0.49	-1.09	-1.63	-2	-2.28	-2.71	-3.9	0
gi|194038369|ref|XM_001929075.1|	194038369	XM_001929075.1	PREDICTED: Sus scrofa similar to polynucleotide adenylyltransferase, transcript variant 1 (LOC100156323), mRNA	LOC100156323	NM_032632.3	10914	PAPOLA	poly(A) polymerase alpha	0	-1.14	-1.48	-1.73	-1.83	-1.65	-1.64	-2.34	-4.11	-2.23	0
gi|194038377|ref|XM_001926474.1|	194038377	AK235817	PREDICTED: Sus scrofa A kinase (PRKA) anchor protein 13 (AKAP13), partial mRNA	AKAP13	BC172356.1	11214	AKAP13	A kinase (PRKA) anchor protein 13	0	-0.65	-0.52	-1.08	-1.68	-2.83	-2.32	-1.72	-1.85	-2.46	0
gi|194038424|ref|XM_001926793.1|	194038424	XM_001926793.1	PREDICTED: Sus scrofa similar to pleckstrin homology domain containing, family G, member 3 (LOC100155870), mRNA	LOC100155870	NM_015549.1	26030	PLEKHG3	pleckstrin homology domain containing, family G (with RhoGef domain) member 3	0	-0.72	-0.2	-0.71	-1.74	-3.73	-4.63	-3.87	-3.06	-3.19	0
gi|194038440|ref|XM_001928314.1|	194038440	XM_001928314.1	PREDICTED: Sus scrofa similar to Vacuolar proton pump subunit D (V-ATPase subunit D) (V-ATPase 28 kDa accessory protein) (LOC100156681), mRNA	LOC100156681	NM_015994.2	51382	ATP6V1D	ATPase, H+ transporting, lysosomal 34kDa, V1 subunit D	0	-0.21	-0.05	-0.4	-0.21	-0.68	-1.52	-1.79	-1.24	-1.08	0
gi|194038456|ref|XM_001928767.1|	194038456	XM_001928767.1	PREDICTED: Sus scrofa similar to retinol dehydrogenase 11 (LOC100154684), mRNA	LOC100154684	NM_016026.3	51109	RDH11	retinol dehydrogenase 11 (all-trans/9-cis/11-cis)	0	-0.44	-0.41	-1.06	-1.31	-1.92	-2.58	-3.22	-5.06	-6.15	0
gi|194038462|ref|XM_001926182.1|	194038462	XM_001926182.1	PREDICTED: Sus scrofa similar to RAD51-like 1 (LOC100153441), partial mRNA	LOC100153441	DQ894081.2	5890	RAD51L1	RAD51-like 1 (S. cerevisiae)	0	-1.21	-1.29	-1.09	-2.13	-3.02	-3.91	-10.02	-10.02	-10.02	0
gi|194038464|ref|XM_001924308.1|	194038464	XM_001924308.1	PREDICTED: Sus scrofa similar to LOC614773 protein (LOC100152130), mRNA	LOC100152130	NM_004926.2	677	ZFP36L1	zinc finger protein 36, C3H type-like 1	0	0.54	0.68	0.89	0.93	-1.6	-1.17	-1.33	-3.47	-4.68	0
gi|194038505|ref|XM_001928042.1|	194038505	XM_001928042.1	PREDICTED: Sus scrofa similar to Mediator complex subunit 6 (LOC100152526), mRNA	LOC100152526	BC004106.2	10001	MED6	mediator complex subunit 6	0	-0.07	-0.13	-0.82	-0.38	-1.04	-1.68	-1.36	-2.22	-1.14	0
gi|194038509|ref|XM_001925672.1|	194038509	XM_001925672.1	PREDICTED: Sus scrofa similar to pecanex-like protein 1 (LOC100154536), mRNA	LOC100154536	NM_014982.2	22990	PCNX	pecanex homolog (Drosophila)	0	-0.78	-0.5	-0.76	-0.89	-1.6	-1.28	-2.07	-2.86	-2.7	0
gi|194038511|ref|XM_001928438.1|	194038511	XM_001928438.1	PREDICTED: Sus scrofa similar to Signal-induced proliferation-associated 1-like protein 1 (SIPA1-like protein 1) (High-risk human papilloma viruses E6 oncoproteins targeted protein 1) (E6-targeted protein 1) (LOC100157762), mRNA	LOC100157762	NM_015556.1	26037	SIPA1L1	signal-induced proliferation-associated 1 like 1	0	-0.28	0.19	-0.21	-0.36	-3.29	-3.6	-2.76	-1.84	-1.91	0
gi|194038523|ref|XM_001928961.1|	194038523	XM_001928961.1	PREDICTED: Sus scrofa similar to Paraneoplastic antigen Ma1 (Neuron- and testis-specific protein 1) (37 kDa neuronal protein) (LOC100154070), mRNA	LOC100154070	AK290980.1	9240	PNMA1	paraneoplastic antigen MA1	0	-1.12	-0.65	-1.72	-1.69	-2.64	-4.54	-4.11	-3.46	-2.27	0
gi|194038545|ref|XM_001929151.1|	194038545	XM_001929151.1	PREDICTED: Sus scrofa similar to lin-52 homolog (LOC100157325), mRNA	LOC100157325	NM_001024674.2	91750	LIN52	lin-52 homolog (C. elegans)	0	-0.84	-1.17	-0.91	-0.83	-2.29	-2.33	-0.36	-2.72	-3.64	0
gi|194038579|ref|XM_001926122.1|	194038579	XM_001926122.1	PREDICTED: Sus scrofa similar to Acylphosphatase-1 (Acylphosphate phosphohydrolase 1) (Acylphosphatase, organ-common type isozyme) (LOC100155997), mRNA	LOC100155997	NM_001107.3	97	ACYP1	acylphosphatase 1, erythrocyte (common) type	0	0.56	0.78	1.03	0.84	-1.04	-1.9	-1.56	-3.14	-4.72	0
gi|194038585|ref|XM_001926711.1|	194038585	XM_001926711.1	PREDICTED: Sus scrofa similar to transmembrane trafficking protein (LOC100158015), mRNA	LOC100158015	NM_006827.5	10972	TMED10	transmembrane emp24-like trafficking protein 10 (yeast)	0	-1.44	-1.34	-1.37	-1.1	-1.77	-2.77	-2.72	-2.24	-2.7	0
gi|194038604|ref|XM_001928316.1|	194038604	XM_001928316.1	PREDICTED: Sus scrofa similar to polyglutamine-containing protein (LOC100152768), mRNA	LOC100152768	NM_024496.2	64207	C14orf4	chromosome 14 open reading frame 4	0	-0.21	-0.51	-1.07	0.06	-1.46	-1.42	-1.78	-1.9	-3.26	0
gi|194038685|ref|XM_001928148.1|	194038685	XM_001928148.1	PREDICTED: Sus scrofa similar to STRA6 protein (LOC100153335), mRNA	LOC100153335	BX537413.1	64220	STRA6	stimulated by retinoic acid gene 6 homolog (mouse)	0	-0.05	-1.95	-10.44	-10.44	-10.44	-10.44	-10.44	-10.44	-10.44	0
gi|194038687|ref|XM_001928174.1|	194038687	XM_001928174.1	PREDICTED: Sus scrofa similar to immunoglobulin superfamily containing leucine-rich repeat (LOC100152082), mRNA	LOC100152082	AY358871.1	3671	ISLR	immunoglobulin superfamily containing leucine-rich repeat	0	-1.22	-1.33	-1.48	-2.08	-3.25	-3.83	-5.58	-3.39	-4.23	0
gi|194038695|ref|XM_001928512.1|	194038695	XM_001928512.1	PREDICTED: Sus scrofa similar to Lysyl oxidase-like 1 (LOC100154899), mRNA	LOC100154899	NM_005576.2	4016	LOXL1	lysyl oxidase-like 1	0	-1.3	-1.39	-1.25	-1.84	-3.18	-6.32	-5.89	-4.57	-6.06	0
gi|194038708|ref|XM_001928665.1|	194038708	XM_001928665.1	PREDICTED: Sus scrofa similar to neuroplastin (LOC100155307), mRNA	LOC100155307	NM_012428.3	27020	NPTN	neuroplastin	0	-0.52	-0.59	-0.52	-0.53	-1.24	-1.33	-0.95	-2.39	-2.03	0
gi|194038714|ref|XM_001926092.1|	194038714	XM_001926092.1	PREDICTED: Sus scrofa similar to Neogenin (LOC100156504), mRNA	LOC100156504	NM_002499.2	4756	NEO1	neogenin homolog 1 (chicken)	0	-1.55	-1.43	-1.56	-1.03	-2.49	-2.91	-3.9	-1.85	-4.32	0
gi|194038719|ref|XM_001926310.1|	194038719	XM_001926310.1	PREDICTED: Sus scrofa similar to ADP-dependent glucokinase (LOC100152109), mRNA	LOC100152109	NR_023318.1	83440	ADPGK	ADP-dependent glucokinase	0	-1.99	-1.31	-1.19	-2.01	-1.78	-3.4	-3.71	-3.16	-3.34	0
gi|194038777|ref|XM_001928268.1|	194038777	XM_001928268.1	PREDICTED: Sus scrofa similar to sorting nexin 6 (LOC100154775), mRNA	LOC100154775	NM_152233.2	58533	SNX6	sorting nexin 6	0	-1.06	-1.65	-2.26	-1.68	-1.79	-2.12	-2.5	-4.31	-3.65	0
gi|194038779|ref|XM_001928370.1|	194038779	XM_001928370.1	PREDICTED: Sus scrofa similar to E2F-associated phosphoprotein (LOC100153549), mRNA	LOC100153549	NM_018453.3	55837	EAPP	E2F-associated phosphoprotein	0	-0.45	-0.06	0.14	-0.12	-0.04	-1.58	-1.78	-0.91	-1.66	0
gi|194038814|ref|XM_001927793.1|	194038814	XM_001927793.1	PREDICTED: Sus scrofa similar to KIAA1333 protein (LOC100153402), mRNA	LOC100153402	NM_017769.3	55632	G2E3	G2/M-phase specific E3 ubiquitin ligase	0	0	0.15	-0.74	-0.67	-2.21	-1.24	-3.14	-4.23	-10.67	0
gi|194038816|ref|XM_001925028.1|	194038816	XM_001925028.1	PREDICTED: Sus scrofa similar to protein kinase D1 (LOC100153421), mRNA	LOC100153421	NM_002742.2	5587	PRKD1	protein kinase D1	0	0.17	0.35	1.09	1.4	-0.68	-3.55	-3.38	-3.56	-3.86	0
gi|194038818|ref|XM_001924413.1|	194038818	XM_001924413.1	PREDICTED: Sus scrofa similar to RNA-binding protein Nova-1 (Neuro-oncological ventral antigen 1) (Ventral neuron-specific protein 1) (LOC100158068), mRNA	LOC100158068	AL132716.6	4857	NOVA1	neuro-oncological ventral antigen 1	0	-1.18	0.03	0.02	-0.58	-2.14	-1.37	-10.47	-2.6	-10.47	0
gi|194038820|ref|XM_001925132.1|	194038820	XM_001925132.1	PREDICTED: Sus scrofa similar to Syntaxin-binding protein 6 (LOC100153628), mRNA	LOC100153628	AK309203.1	29091	STXBP6	syntaxin binding protein 6 (amisyn)	0	0.13	0.18	-0.58	0.01	-2.02	-4.14	-2.29	-4.97	-10.83	0
gi|194038838|ref|XM_001927354.1|	194038838	XM_001927354.1	PREDICTED: Sus scrofa similar to cytoplasmic nuclear factor of activated T-cells 4 (LOC100154469), mRNA	LOC100154469	BC008857.2	4776	NFATC4	nuclear factor of activated T-cells, cytoplasmic, calcineurin-dependent 4	0	-1.41	-1.24	-1.79	-1.95	-3.31	-4.12	-12.22	-6.36	-5.43	0
gi|194038854|ref|XM_001928014.1|	194038854	XM_001928014.1	PREDICTED: Sus scrofa similar to Guanosine monophosphate reductase 2 (LOC100154068), mRNA	LOC100154068	NM_001002000.1	51292	GMPR2	guanosine monophosphate reductase 2	0	0.6	0.73	1.42	0.68	0.65	-1.37	-1.78	-1.88	-1.57	0
gi|194038860|ref|XM_001928235.1|	194038860	XM_001928235.1	PREDICTED: Sus scrofa similar to ring finger protein 31 (LOC100158067), mRNA	LOC100158067	AK291247.1	55072	RNF31	ring finger protein 31	0	-1	-0.76	-1.27	-1.16	-0.08	-1.36	-1.53	-3.87	-4.21	0
gi|194038887|ref|XM_001926257.1|	194038887	XM_001926257.1	PREDICTED: Sus scrofa similar to Polyadenylate-binding protein 2 (Poly(A)-binding protein 2) (Poly(A)-binding protein II) (PABII) (Polyadenylate-binding nuclear protein 1) (Nuclear poly(A)-binding protein 1) (LOC100155260), mRNA	LOC100155260	NM_004643.2	8106	PABPN1	poly(A) binding protein, nuclear 1	0	0.32	0.81	1.44	1.01	-0.11	-1.12	-0.95	-8.81	-8.81	0
gi|194038889|ref|XM_001928918.1|	194038889	XM_001928918.1	PREDICTED: Sus scrofa similar to MGC128881 protein (LOC100152841), mRNA	LOC100152841	NM_016609.3	51310	SLC22A17	solute carrier family 22, member 17	0	-1.38	-1.48	-2.03	-2.1	-3.09	-3.89	-12	-12	-12	0
gi|194038900|ref|XM_001925133.1|	194038900	XM_001925133.1	PREDICTED: Sus scrofa similar to Apoptotic chromatin condensation inducer in the nucleus (Acinus) (LOC100156353), mRNA	LOC100156353	NM_001164817.1	22985	ACIN1	apoptotic chromatin condensation inducer 1	0	1.14	0.64	0.39	0.47	-0.86	-0.57	-2.01	-4.27	-3.64	0
gi|194038958|ref|XM_001929118.1|	194038958	XM_001929118.1	PREDICTED: Sus scrofa similar to epidermal Langerhans cell protein LCP1 (LOC100152681), mRNA	LOC100152681	NM_014828.2	9878	TOX4	TOX high mobility group box family member 4	0	-0.9	-0.52	-0.64	-1.45	-0.5	-0.95	-1.87	-2.54	-3.46	0
gi|194038960|ref|XM_001929067.1|	194038960	XM_001929067.1	PREDICTED: Sus scrofa similar to RAB2B protein (LOC100157917), mRNA	LOC100157917	NM_032846.3	84932	RAB2B	RAB2B, member RAS oncogene family	0	-2.31	-3.2	-9.61	-4.05	-3.61	-3.5	-9.61	-9.61	-9.61	0
gi|194039201|ref|XM_001927248.1|	194039201	XM_001927248.1	PREDICTED: Sus scrofa hypothetical protein LOC100154146 (LOC100154146), mRNA	LOC100154146	NM_024713.2	79768	C15orf29	chromosome 15 open reading frame 29	0	-1.24	-0.35	-0.65	-0.84	-1.06	-3.63	-2.2	-1.75	-2.36	0
gi|194039271|ref|XM_001925149.1|	194039271	XM_001925149.1	PREDICTED: Sus scrofa similar to Trf (TATA binding protein-related factor)-proximal homolog (LOC100157502), mRNA	LOC100157502	AK300573.1	9477	MED20	mediator complex subunit 20	0	-0.61	-0.15	-0.8	-0.59	-1.24	-3.08	-2.43	-3.32	-4.4	0
gi|194039308|ref|XM_001929214.1|	194039308	XM_001929214.1	PREDICTED: Sus scrofa cullin 7 (CUL7), mRNA	CH242-196P11.12	D38548.1	9820	CUL7	cullin 7	0	-0.68	-0.42	-0.68	-0.81	-3	-4.12	-3.95	-4.94	-6.03	0
gi|194039314|ref|XM_001926691.1|	194039314	XM_001926691.1	PREDICTED: Sus scrofa similar to Tyrosine-protein kinase-like 7 precursor (Colon carcinoma kinase 4) (CCK-4) (LOC100153873), mRNA	LOC100153873	NM_002821.3	5754	PTK7	PTK7 protein tyrosine kinase 7	0	-2.01	-2.71	-2.36	-3.55	-5.7	-11.7	-11.7	-11.7	-11.7	0
gi|194039356|ref|XM_001929465.1|	194039356	XM_001929465.1	PREDICTED: Sus scrofa similar to RANBP21 (LOC100155084), mRNA	LOC100155084	NM_020750.2	57510	XPO5	exportin 5	0	-0.69	-1.37	-1.33	-1.7	-1.47	-1.99	-2.25	-3.73	-2.14	0
gi|194039388|ref|XM_001929568.1|	194039388	XM_001929568.1	PREDICTED: Sus scrofa similar to Solute carrier family 29 (nucleoside transporters), member 1 (LOC100155927), mRNA	LOC100155927	NM_001078177.1	2030	SLC29A1	solute carrier family 29 (nucleoside transporters), member 1	0	-0.57	-0.35	-0.9	-0.21	-0.16	-0.56	-2.23	-2.63	-2.34	0
gi|194039390|ref|XM_001929570.1|	194039390	XM_001929570.1	PREDICTED: Sus scrofa heat shock 90kD protein 1, beta (HSPCB), mRNA	HSPCB	AK297367.1	3326	HSP90AB1	heat shock protein 90kDa alpha (cytosolic), class B member 1	0	0.61	0.07	-0.12	-0.81	-0.55	-0.84	-1.55	-3.8	-1.39	0
gi|194039400|ref|XM_001929593.1|	194039400	XM_001929593.1	PREDICTED: Sus scrofa similar to alanyl-tRNA synthetase like (LOC100155115), mRNA	LOC100155115	NM_020745.2	57505	AARS2	alanyl-tRNA synthetase 2, mitochondrial (putative)	0	-0.76	-0.02	-0.78	-0.81	-1.12	-3.18	-2.17	-3.1	-4.51	0
gi|194039402|ref|XM_001929597.1|	194039402	XM_001929597.1	PREDICTED: Sus scrofa similar to CDC5 cell division cycle 5-like (LOC100153900), mRNA	LOC100153900	BC001568.1	988	CDC5L	CDC5 cell division cycle 5-like (S. pombe)	0	-0.37	0.01	-0.41	-0.33	-0.76	-0.95	-1.95	-2.62	-2.85	0
gi|194039473|ref|XM_001924813.1|	194039473	XM_001924813.1	PREDICTED: Sus scrofa similar to DNA replication licensing factor MCM3 (DNA polymerase alpha holoenzyme-associated protein P1) (RLF subunit beta) (P102 protein) (P1-MCM3) (LOC100154824), mRNA	LOC100154824	AK301704.1	4172	MCM3	minichromosome maintenance complex component 3	0	-0.57	-1.48	-1.48	-2.44	-5.1	-11.1	-4.56	-11.1	-11.1	0
gi|194039480|ref|XM_001926227.1|	194039480	XM_001926227.1	PREDICTED: Sus scrofa proteasome (prosome, macropain) subunit, alpha type, 4 (PSMA4), mRNA	PSMA4	NM_001102667.1	5685	PSMA4	proteasome (prosome, macropain) subunit, alpha type, 4	0	0.36	0.15	-0.02	-0.16	0.22	-0.5	-0.9	-0.59	-0.88	0
gi|194039486|ref|XM_001927002.1|	194039486	XM_001927002.1	PREDICTED: Sus scrofa similar to WD repeat domain 61 (LOC100153204), mRNA	LOC100153204	BC010080.2	80349	WDR61	WD repeat domain 61	0	0.09	-0.64	-1.09	-1.09	-1.15	-0.94	-1.3	-2.45	-1.19	0
gi|194039494|ref|XM_001927247.1|	194039494	XM_001927247.1	PREDICTED: Sus scrofa similar to calcium and integrin binding family member 2, transcript variant 1 (LOC100156043), mRNA	LOC100156043	BC047381.1	10518	CIB2	calcium and integrin binding family member 2	0	-2.67	-2.51	-2.98	-3.16	-9.73	-3.62	-9.73	-9.73	-9.73	0
gi|194039500|ref|XM_001925226.1|	194039500	XM_001925226.1	PREDICTED: Sus scrofa similar to ADAM metallopeptidase with thrombospondin type 1 motif, 7 (LOC100154398), mRNA	LOC100154398	NM_014272.3	11173	ADAMTS7	ADAM metallopeptidase with thrombospondin type 1 motif, 7	0	-1.05	-1	-1.26	-2.37	-4.52	-12.11	-12.11	-5.24	-6.33	0
gi|194039546|ref|XM_001928863.1|	194039546	XM_001928863.1	PREDICTED: Sus scrofa similar to Mesoderm development candidate 2 (LOC100157638), mRNA	LOC100157638	NM_015154.1	23184	MESDC2	mesoderm development candidate 2	0	-0.54	-0.28	-0.67	-0.64	-1.25	-2.44	-2.69	-4.23	-3.44	0
gi|194039563|ref|XM_001929079.1|	194039563	XM_001929079.1	PREDICTED: Sus scrofa similar to SH3GL3 protein (LOC100157660), mRNA	LOC100157660	BC042864.1	6457	SH3GL3	SH3-domain GRB2-like 3	0	-0.49	-0.89	-1.82	-2.27	-11.16	-11.16	-11.16	-5.3	-11.16	0
gi|194039587|ref|XM_001929390.1|	194039587	XM_001929390.1	PREDICTED: Sus scrofa similar to HD domain-containing protein 3 (LOC100153189), mRNA	LOC100153189	CR625970.1	374659	HDDC3	HD domain containing 3	0	1.3	1.07	1.13	1.23	0.11	-0.57	-0.62	-2.71	-3.37	0
gi|194039589|ref|XM_001929373.1|	194039589	XM_001929373.1	PREDICTED: Sus scrofa similar to MGC148594 protein (LOC100151986), mRNA	LOC100151986	NM_018671.3	55898	UNC45A	unc-45 homolog A (C. elegans)	0	-0.52	-0.94	-0.73	-1.21	-1.84	-3.11	-3.75	-2.34	-2.54	0
gi|194039595|ref|XM_001929425.1|	194039595	XM_001929425.1	PREDICTED: Sus scrofa similar to Zinc finger protein ZXDC (ZXD-like zinc finger protein) (LOC100156021), mRNA	LOC100156021	NM_001040653.2	79364	ZXDC	ZXD family zinc finger C	0	-0.55	0.28	-0.37	-0.88	-0.39	-0.76	-0.7	-0.81	-1.25	0
gi|194039687|ref|XM_001928955.1|	194039687	XM_001928955.1	PREDICTED: Sus scrofa similar to reticulocalbin 2, EF-hand calcium binding domain (LOC100153840), mRNA	LOC100153840	NM_002902.2	5955	RCN2	reticulocalbin 2, EF-hand calcium binding domain	0	-1.26	-0.85	-1.37	-1.85	-2.25	-3.19	-3	-3.57	-3.77	0
gi|194039715|ref|XM_001925448.1|	194039715	XM_001925448.1	PREDICTED: Sus scrofa similar to SRY (sex determining region Y)-box 4 (LOC100155898), mRNA	LOC100155898	EU446655.1	6659	SOX4	SRY (sex determining region Y)-box 4	0	-0.36	-0.47	-0.35	-0.49	-3.65	-4.32	-4.62	-4.18	-12.74	0
gi|194039871|ref|XM_001928399.1|	194039871	XM_001928399.1	PREDICTED: Sus scrofa similar to zinc finger protein 322A (LOC100154074), mRNA	LOC100154074	AK290038.1	79692	ZNF322A	zinc finger protein 322A	0	-0.68	-0.8	-0.68	-1.2	-1.82	-2.18	-2.82	-2.76	-1.93	0
gi|194039948|ref|XM_001929005.1|	194039948	XM_001929005.1	PREDICTED: Sus scrofa similar to zinc finger with KRAB and SCAN domains 4 (LOC100156123), mRNA	LOC100156123	AK315783.1	387032	ZKSCAN4	zinc finger with KRAB and SCAN domains 4	0	-0.22	-0.3	0.29	0.01	-1.51	-9.52	-9.52	-9.52	-9.52	0
gi|194039952|ref|XM_001929003.1|	194039952	XM_001929003.1	PREDICTED: Sus scrofa similar to zinc finger protein 187 (LOC100153683), mRNA	LOC100153683	NM_001023560.2	7741	ZNF187	zinc finger protein 187	0	1.27	0.72	0.89	0.76	-1.09	-1.99	-1.3	-9.42	-9.42	0
gi|194039965|ref|XM_001929159.1|	194039965	XM_001929159.1	PREDICTED: Sus scrofa similar to zinc finger protein 452 (LOC100158135), mRNA	LOC100158135	BC111741.1	114821	SCAND3	SCAN domain containing 3	0	-0.63	-0.22	-0.07	-0.44	-9.92	-9.92	-9.92	-9.92	-9.92	0
gi|194040154|ref|XM_001928285.1|	194040154	XM_001928285.1	PREDICTED: Sus scrofa similar to protein phosphatase 1, regulatory subunit 10 (LOC100156805), mRNA	LOC100156805	NM_002714.2	5514	PPP1R10	protein phosphatase 1, regulatory (inhibitor) subunit 10	0	1.19	0.96	-0.54	0.35	-1.14	-0.04	-2.93	-1.61	-1.36	0
gi|194040161|ref|XM_001928664.1|	194040161	XM_001928664.1	PREDICTED: Sus scrofa similar to putative transcription factor (LOC100152381), mRNA	TCF19					0	-0.3	-0.24	-0.45	-1.64	-4.67	-10.67	-10.67	-10.67	-10.67	0
gi|194040187|ref|XM_001929102.1|	194040187	XM_001929102.1	PREDICTED: Sus scrofa similar to HLA-B associated transcript 5 (LOC100155979), mRNA	BAT5	BC031839.1	7920	BAT5	HLA-B associated transcript 5	0	0.37	0.31	0.45	-0.05	0.14	-0.63	-1.26	-2.17	-2	0
gi|194040232|ref|XM_001929613.1|	194040232	XM_001929613.1	PREDICTED: Sus scrofa similar to retinoid X receptor, beta (LOC100156801), mRNA	SBAB-279G2.3	NM_021976.3	6257	RXRB	retinoid X receptor, beta	0	0	0.02	0.05	0.02	-0.51	-0.64	-1.49	-3.09	-2.82	0
gi|194040238|ref|XM_001929612.1|	194040238	XM_001929612.1	PREDICTED: Sus scrofa similar to ring finger protein 1 (LOC100153162), mRNA	SBAB-279G2.4	AK301010.1	6015	RING1	ring finger protein 1	0	-0.08	0	-0.24	-0.31	-1.14	-1.24	-2.15	-3.47	-1.5	0
gi|194040252|ref|XM_001927688.1|	194040252	XM_001927688.1	PREDICTED: Sus scrofa similar to Leucine-rich repeat-containing protein 1 (LAP and no PDZ protein) (LANO adapter protein) (LOC100154780), mRNA	LOC100154780	AK292248.1	55227	LRRC1	leucine rich repeat containing 1	0	-0.45	-0.72	-1.67	-2.51	-3.3	-3.78	-9.88	-9.88	-9.88	0
gi|194040265|ref|XM_001924600.1|	194040265	XM_001924600.1	PREDICTED: Sus scrofa similar to Zinc finger protein 451 (Coactivator for steroid receptors) (LOC100155018), mRNA	LOC100155018	AK225806.1	26036	ZNF451	zinc finger protein 451	0	-0.69	-0.76	-2.06	-1.47	-4.32	-1.71	-3.78	-2.23	-2.2	0
gi|194040280|ref|XM_001925339.1|	194040280	XM_001925339.1	PREDICTED: Sus scrofa similar to collagen, type XXI, alpha 1 (LOC100155001), mRNA	LOC100155001	NM_030820.3	81578	COL21A1	collagen, type XXI, alpha 1	0	0.23	1.02	1.26	0.26	-3.31	-4.96	-4.61	-5.12	-6.72	0
gi|194040290|ref|XM_001927693.1|	194040290	XM_001927693.1	PREDICTED: Sus scrofa similar to Ral guanine nucleotide dissociation stimulator-like 2 (LOC100151794), mRNA	LOC100151794	NM_004761.3	5863	RGL2	ral guanine nucleotide dissociation stimulator-like 2	0	-0.22	0.06	-0.3	-0.24	-0.6	-0.52	-1.45	-0.94	-0.7	0
gi|194040294|ref|XM_001927786.1|	194040294	XM_001927786.1	PREDICTED: Sus scrofa similar to zinc finger and BTB domain containing 22 (LOC100157038), mRNA	LOC100157038	AK315747.1	9278	ZBTB22	zinc finger and BTB domain containing 22	0	0.47	0.07	-0.32	-0.9	-0.66	-1.56	-2.93	-3.03	-3.69	0
gi|194040297|ref|XM_001927845.1|	194040297	XM_001927845.1	PREDICTED: Sus scrofa similar to kinesin family member C1 (LOC100154627), mRNA	LOC100154627	NM_002263.3	3833	KIFC1	kinesin family member C1	0	-0.87	-0.64	-0.7	-1.32	-4.5	-11.5	-11.5	-11.5	-11.5	0
gi|194040321|ref|XM_001928400.1|	194040321	XM_001928400.1	PREDICTED: Sus scrofa similar to High mobility group protein HMG-I/HMG-Y (HMG-I(Y)) (High mobility group AT-hook protein 1) (High mobility group protein A1) (High mobility group protein-R), transcript variant 1 (LOC100157848), mRNA	HMGA1	NM_145901.2	3159	HMGA1	high mobility group AT-hook 1	0	-0.87	-0.49	-0.25	-1.27	-1.35	-2.38	-2	-1.6	-2.79	0
gi|194040362|ref|XM_001927018.1|	194040362	XM_001927018.1	PREDICTED: Sus scrofa similar to Zinc finger protein 76 (LOC100156228), mRNA	LOC100156228	BC000133.2	7629	ZNF76	zinc finger protein 76 (expressed in testis)	0	-0.11	0.32	0.07	-0.09	0.17	-0.55	-2.26	-2.08	-1.74	0
gi|194040364|ref|XM_001929239.1|	194040364	XM_001929239.1	PREDICTED: Sus scrofa similar to differentially expressed in FDCP 6 homolog (LOC100154998), mRNA	LOC100154998	AY241694.1	50619	DEF6	differentially expressed in FDCP 6 homolog (mouse)	0	1.85	0.69	1.83	1.49	-7.88	-1.77	-7.88	-7.88	-7.88	0
gi|194040422|ref|XM_001929580.1|	194040422	XM_001929580.1	PREDICTED: Sus scrofa similar to mitochondrial carrier homolog 1 (LOC100152609), mRNA	LOC100152609	AY947344.1	23787	MTCH1	mitochondrial carrier homolog 1 (C. elegans)	0	-0.38	-0.53	-0.57	-0.62	-1.16	-1.38	-2	-0.74	-1.35	0
gi|194040436|ref|XM_001924210.1|	194040436	XM_001924210.1	PREDICTED: Sus scrofa similar to KIAA0082 (LOC100154061), partial mRNA	LOC100154061	NM_015050.2	23070	FTSJD2	FtsJ methyltransferase domain containing 2	0	0.11	-0.1	0.24	0.34	-1.45	-1.36	-1.16	-2.21	-2.74	0
gi|194040442|ref|XM_001924568.1|	194040442	XM_001924568.1	PREDICTED: Sus scrofa similar to zinc finger, AN1-type domain 3 (LOC100155253), mRNA	LOC100155253	NM_021943.2	60685	ZFAND3	zinc finger, AN1-type domain 3	0	-0.24	0.23	0.37	-0.26	-0.65	-0.97	-0.73	-0.52	-1.58	0
gi|194040489|ref|XM_001927223.1|	194040489	XM_001927223.1	PREDICTED: Sus scrofa similar to PAB-dependent poly(A)-specific ribonuclease subunit 3 (hPan3) (LOC100157385), mRNA	LOC100157385	BC128179.1	255967	PAN3	PAN3 poly(A) specific ribonuclease subunit homolog (S. cerevisiae)	0	-0.14	0.03	0.01	-0.2	-1.54	-1.73	-2.97	-1.4	-2.1	0
gi|194040498|ref|XM_001928666.1|	194040498	XM_001928666.1	PREDICTED: Sus scrofa similar to katanin p60 subunit A-like 1, isoform 2 (predicted) (LOC100156612), mRNA	LOC100156612	NM_001014380.1	84056	KATNAL1	katanin p60 subunit A-like 1	0	-1.15	-0.63	-0.51	0.06	-0.48	-1.97	-1.16	-2.72	-3.6	0
gi|194040510|ref|XM_001927861.1|	194040510	XM_001927861.1	PREDICTED: Sus scrofa similar to Beta-1,3-glucosyltransferase (Beta3Glc-T) (Beta-3-glycosyltransferase-like) (LOC100156997), mRNA	LOC100156997	BX647932.1	145173	B3GALTL	beta 1,3-galactosyltransferase-like	0	-1.61	-1.29	-2.26	-2.19	-2.17	-3.23	-10.34	-3.47	-10.34	0
gi|194040529|ref|XM_001924631.1|	194040529	XM_001924631.1	PREDICTED: Sus scrofa similar to NEDD4-binding protein 2-like 2 (Phosphonoformate immuno-associated protein 5) (LOC100153603), mRNA	LOC100153603	NM_014887.2	10443	N4BP2L2	NEDD4 binding protein 2-like 2	0	-0.08	0.08	0.12	-0.01	-0.15	-0.97	-0.43	-3.32	-2.28	0
gi|194040533|ref|XM_001924396.1|	194040533	XM_001924396.1	PREDICTED: Sus scrofa similar to Sister chromatid cohesion protein PDS5 homolog B (Androgen-induced proliferation inhibitor) (Androgen-induced prostate proliferative shutoff-associated protein AS3) (LOC100154396), mRNA	LOC100154396	BC172246.1	23047	PDS5B	PDS5, regulator of cohesion maintenance, homolog B (S. cerevisiae)	0	0.54	0.04	0.17	0.1	-1.35	-1.17	-1.82	-4.49	-3.4	0
gi|194040541|ref|XM_001927778.1|	194040541	XM_001927778.1	PREDICTED: Sus scrofa similar to mab-21-like protein 1 (LOC100155671), mRNA	LOC100155671	NM_005584.3	4081	MAB21L1	mab-21-like 1 (C. elegans)	0	-0.16	0.11	0.59	-0.31	-3.11	-3.58	-1.83	-3.83	-9.69	0
gi|194040543|ref|XM_001926478.1|	194040543	XM_001926478.1	PREDICTED: Sus scrofa similar to spastic paraplegia 20 (LOC100152415), mRNA	LOC100152415	NM_015087.4	23111	SPG20	spastic paraplegia 20 (Troyer syndrome)	0	-0.25	-0.36	-0.67	-1.54	-3.91	-3.82	-4.06	-11.92	-11.92	0
gi|194040558|ref|XM_001928742.1|	194040558	XM_001928742.1	PREDICTED: Sus scrofa similar to Periostin precursor (PN) (Osteoblast-specific factor 2) (OSF-2) (LOC100152401), mRNA	LOC100152401	NM_006475.2	10631	POSTN	periostin, osteoblast specific factor	0	-0.37	0.23	-0.93	-1.04	-5.36	-6.26	-8.49	-9.65	-10.24	0
gi|194040597|ref|XM_001928150.1|	194040597	XM_001928150.1	PREDICTED: Sus scrofa similar to ret finger protein 2 (LOC100153839), mRNA	LOC100153839	AY455758.1	10206	TRIM13	tripartite motif-containing 13	0	-0.07	-0.13	-0.2	-1.1	-2.19	-3.35	-2.25	-2.11	-1.78	0
gi|194040616|ref|XM_001929023.1|	194040616	XM_001929023.1	PREDICTED: Sus scrofa similar to purinergic receptor P2Y, G-protein coupled, 5 (LOC100157466), mRNA	LOC100157466	NM_001162498.1	10161	LPAR6	lysophosphatidic acid receptor 6	0	-0.49	-0.43	0.09	0.98	-2.57	-1.45	-2.04	-1.76	-2.84	0
gi|194040627|ref|XM_001927341.1|	194040627	XM_001927341.1	PREDICTED: Sus scrofa similar to mCG119432 (LOC100154666), mRNA	LOC100154666	BC019000.2	23091	ZC3H13	zinc finger CCCH-type containing 13	0	-2.4	-2.01	-1.67	-1.51	-2.29	-9.88	-9.88	-4.03	-9.88	0
gi|194040639|ref|XM_001929314.1|	194040639	XM_001929314.1	PREDICTED: Sus scrofa similar to coiled-coil domain containing 122 (LOC100152642), mRNA	LOC100152642	NM_144974.3	160857	CCDC122	coiled-coil domain containing 122	0	0.72	-0.15	-0.63	0.61	-0.91	-1.66	-2.55	-9.08	-9.08	0
gi|194040641|ref|XM_001925120.1|	194040641	XM_001925120.1	PREDICTED: Sus scrofa similar to DNAJ domain-containing (LOC100154106), mRNA	LOC100154106	AF126743.1	29103	DNAJC15	DnaJ (Hsp40) homolog, subfamily C, member 15	0	-0.53	-0.19	-0.63	-1.36	-1.34	-3.35	-1.71	-1.46	-2.24	0
gi|194040662|ref|XM_001924423.1|	194040662	XM_001924423.1	PREDICTED: Sus scrofa similar to slit and trk like 6 (LOC100153917), mRNA	LOC100153917	AK292793.1	84189	SLITRK6	SLIT and NTRK-like family, member 6	0	-1.01	0.31	0.2	0.82	-1.95	-8.95	-8.95	-8.95	-3.17	0
gi|194040677|ref|XM_001927466.1|	194040677	XM_001927466.1	PREDICTED: Sus scrofa similar to DAZ interacting protein 1 (LOC100152558), mRNA	LOC100152558	NM_014934.3	22873	DZIP1	DAZ interacting protein 1	0	-2.25	-2.41	-2.45	-2.88	-3.5	-5.28	-4.85	-14.29	-14.29	0
gi|194040706|ref|XM_001927201.1|	194040706	XM_001927201.1	PREDICTED: Sus scrofa similar to arginine and glutamate rich 1 (LOC100152796), mRNA	LOC100152796	NM_018011.3	55082	ARGLU1	arginine and glutamate rich 1	0	0.86	0.48	0.42	0.53	-1.35	-0.42	-1	-2.79	-2.6	0
gi|194040741|ref|XM_001926132.1|	194040741	XM_001926132.1	PREDICTED: Sus scrofa similar to CLN5 (LOC100152208), mRNA	LOC100152208	NM_006493.2	1203	CLN5	ceroid-lipofuscinosis, neuronal 5	0	-1.05	-1.05	-1.74	-1.87	-2.11	-3.11	-3.41	-3.44	-2.12	0
gi|194040743|ref|XM_001927771.1|	194040743	XM_001927771.1	PREDICTED: Sus scrofa similar to F-box and leucine-rich repeat protein 3 (LOC100152980), mRNA	LOC100152980	NM_012158.2	26224	FBXL3	F-box and leucine-rich repeat protein 3	0	-0.17	0.16	0.08	0.54	-0.79	-1.89	-1.49	-1.29	-2.02	0
gi|194040755|ref|XM_001927097.1|	194040755	XM_001927097.1	PREDICTED: Sus scrofa similar to sprouty-2-like protein (LOC100157266), mRNA	LOC100157266	NM_005842.2	10253	SPRY2	sprouty homolog 2 (Drosophila)	0	0.1	-0.03	0.26	0.37	-1.32	-2.88	-1.9	-4.76	-5.31	0
gi|194040805|ref|XM_001926915.1|	194040805	XM_001926915.1	PREDICTED: Sus scrofa similar to N-glycanase 1 (LOC100157927), partial mRNA	LOC100157927	NM_001145294.1	55768	NGLY1	N-glycanase 1	0	-0.29	-0.18	-0.07	-0.26	-0.63	-0.97	-1.61	-1.63	-1.2	0
gi|194040840|ref|XM_001928477.1|	194040840	XM_001928477.1	PREDICTED: Sus scrofa similar to SEC22 vesicle trafficking protein homolog C (S. cerevisiae) (LOC100155377), mRNA	LOC100155377	AK292856.1	9117	SEC22C	SEC22 vesicle trafficking protein homolog C (S. cerevisiae)	0	-1.64	-0.86	-0.69	-1.35	-1.27	-2.76	-1.91	-2.41	-3.34	0
gi|194040870|ref|XM_001924240.1|	194040870	XM_001924240.1	PREDICTED: Sus scrofa similar to protein tyrosine phosphatase, non-receptor type 23 (LOC100154007), partial mRNA	LOC100154007	AK289502.1	25930	PTPN23	protein tyrosine phosphatase, non-receptor type 23	0	-0.71	-0.84	-1.41	-1.17	-1.67	-2.53	-3.86	-5.28	-3.47	0
gi|194040939|ref|XM_001924716.1|	194040939	XM_001924716.1	PREDICTED: Sus scrofa similar to LOC515537 protein (LOC100154619), mRNA	LOC100154619	NM_019895.2	56650	CLDND1	claudin domain containing 1	0	-1.1	-1.04	-0.92	-0.55	-1.15	-2.42	-1.5	-4.55	-4.95	0
gi|194040961|ref|XM_001924920.1|	194040961	XM_001924920.1	PREDICTED: Sus scrofa similar to Stress 70 protein chaperone, microsome-associated, 60kD (LOC100152073), mRNA	LOC100152073	NM_006948.4	6782	HSPA13	heat shock protein 70kDa family, member 13	0	-1.21	-0.89	-1.55	-2.11	-2.02	-4.66	-5.81	-6.49	-12.35	0
gi|194040969|ref|XM_001924529.1|	194040969	XM_001924529.1	PREDICTED: Sus scrofa similar to fibronectin type III domain containing 3B (LOC100153395), mRNA	LOC100153395	NM_001135095.1	64778	FNDC3B	fibronectin type III domain containing 3B	0	-2.38	-1.53	-1.35	-1.07	-1.86	-3.01	-3.68	-3.76	-4.53	0
gi|194040977|ref|XM_001927185.1|	194040977	XM_001927185.1	PREDICTED: Sus scrofa similar to tetratricopeptide repeat domain 14 (LOC100151821), mRNA	LOC100151821	GQ129409.1	151613	TTC14	tetratricopeptide repeat domain 14	0	0.31	-0.74	-2.19	0.38	-1.13	-2.07	-4.8	-5.49	-3.38	0
gi|194040991|ref|XM_001924397.1|	194040991	XM_001924397.1	PREDICTED: Sus scrofa similar to melanoma antigen family F, 1 (LOC100156926), mRNA	LOC100156926	NM_022149.4	64110	MAGEF1	melanoma antigen family F, 1	0	-0.53	0.39	-0.04	-0.18	-1.6	-1.69	-3.07	-9.61	-9.61	0
gi|194041001|ref|XM_001924658.1|	194041001	XM_001924658.1	PREDICTED: Sus scrofa similar to insulin-like growth factor 2 mRNA binding protein 2 (LOC100157731), mRNA	LOC100157731	NM_006548.4	10644	IGF2BP2	insulin-like growth factor 2 mRNA binding protein 2	0	0.68	-2.11	-2.61	0.23	-2.1	-3.01	-9.69	-9.69	-9.69	0
gi|194041005|ref|XM_001926317.1|	194041005	XM_001926317.1	PREDICTED: Sus scrofa similar to TBCC domain containing 1 (LOC100154090), mRNA	LOC100154090	NM_018138.3	55171	TBCCD1	TBCC domain containing 1	0	0.07	-0.07	0.2	0.05	-1.47	-1.46	-2.7	-2.11	-3.45	0
gi|194041007|ref|XM_001926441.1|	194041007	XM_001926441.1	PREDICTED: Sus scrofa similar to DnaJ homolog subfamily B member 11 precursor (ER-associated dnaJ protein 3) (ERj3p) (ERdj3) (ER-associated Hsp40 co-chaperone) (ER-associated DNAJ) (HEDJ) (hDj9) (PWP1-interacting protein 4) (APOBEC1-binding protein 2) (AB	LOC100152894	BC046500.1	51726	DNAJB11	DnaJ (Hsp40) homolog, subfamily B, member 11	0	0.67	0.47	0.6	0.34	-0.47	-0.96	-1.48	-4.61	-4.2	0
gi|194041032|ref|XM_001925741.1|	194041032	XM_001925741.1	PREDICTED: Sus scrofa similar to transmembrane protein 44 (LOC100153715), mRNA	LOC100153715	NM_001011655.2	93109	TMEM44	transmembrane protein 44	0	-0.02	-0.23	-0.21	-0.25	-4.68	-3.99	-3.69	-6.82	-6.9	0
gi|194041036|ref|XM_001925819.1|	194041036	XM_001925819.1	PREDICTED: Sus scrofa hypothetical protein LOC100156547 (LOC100156547), mRNA	LOC100156547	AC046143.20	93109	TMEM44	transmembrane protein 44	0	-1.15	-1.33	-0.93	-0.86	-2.63	-2.65	-1.61	-2.09	-2.91	0
gi|194041065|ref|XM_001928989.1|	194041065	XM_001928989.1	PREDICTED: Sus scrofa similar to Integrin beta-5 (LOC100152519), mRNA	LOC100152519	CR609293.1	3693	ITGB5	integrin, beta 5	0	-0.85	-1.02	-1.17	-1.4	-2.49	-2.24	-2.83	-3.13	-2.19	0
gi|194041107|ref|XM_001927762.1|	194041107	XM_001927762.1	PREDICTED: Sus scrofa similar to Male-specific lethal 2-like 1 (MSL2-like 1) (Male-specific lethal-2 homolog 1) (MSL-2) (RING finger protein 184) (LOC100155763), mRNA	LOC100155763	NM_018133.3	55167	MSL2	male-specific lethal 2 homolog (Drosophila)	0	-0.29	-0.46	-0.36	-0.31	-1.03	-1.63	-2.2	-2.63	-2.86	0
gi|194041132|ref|XM_001926773.1|	194041132	XM_001926773.1	PREDICTED: Sus scrofa similar to putative calcium influx channel TRPC1A (LOC100156938), mRNA	TRPC1					0	-2.08	-1.61	-1.26	-2.65	-3.02	-2.33	-10.02	-10.02	-10.02	0
gi|194041154|ref|XM_001925630.1|	194041154	XM_001925630.1	PREDICTED: Sus scrofa similar to TSC22 domain family protein 2 (TSC22-related-inducible leucine zipper protein 4) (LOC100155608), mRNA	LOC100155608	NM_014779.2	9819	TSC22D2	TSC22 domain family, member 2	0	0.5	0.23	-0.39	-0.6	-1.51	-0.99	-2.02	-2.76	-0.98	0
gi|194041162|ref|XM_001927505.1|	194041162	XM_001927505.1	PREDICTED: Sus scrofa similar to Structural maintenance of chromosomes protein 4 (Chromosome-associated polypeptide C) (hCAP-C) (XCAP-C homolog) (LOC100152361), mRNA	LOC100152361	NM_005496.3	10051	SMC4	structural maintenance of chromosomes 4	0	-1.87	-1.66	-2.57	-2.61	-4.55	-4.97	-5.35	-4.55	-5.29	0
gi|194041219|ref|XM_001928126.1|	194041219	XM_001928126.1	PREDICTED: Sus scrofa similar to stabilin 1 (LOC100153599), mRNA	LOC100153599	BC150250.1	23166	STAB1	stabilin 1	0	-2.31	-0.93	-1.07	-1.06	-1.65	-2.84	-4.58	-5.26	-11.12	0
gi|194041230|ref|XM_001925354.1|	194041230	XM_001925354.1	PREDICTED: Sus scrofa similar to nischarin (LOC100156417), mRNA	LOC100156417	NM_007184.3	11188	NISCH	nischarin	0	-0.87	-0.78	-1.26	-1.37	-2.41	-3.37	-4.47	-4.21	-3.92	0
gi|194041234|ref|XM_001925415.1|	194041234	XM_001925415.1	PREDICTED: Sus scrofa similar to Protein polybromo-1 (hPB1) (Polybromo-1D) (BRG1-associated factor 180) (BAF180) (LOC100153986), mRNA	LOC100153986	BC129934.1	55193	PBRM1	polybromo 1	0	-1.24	-1.47	-0.96	-1.77	-2.66	-3.56	-3.87	-6.13	-5.61	0
gi|194041236|ref|XM_001928454.1|	194041236	XM_001928454.1	PREDICTED: Sus scrofa similar to guanine nucleotide binding protein-like 3 (LOC100155235), mRNA	LOC100155235	AK315484.1	26354	GNL3	guanine nucleotide binding protein-like 3 (nucleolar)	0	-0.18	-0.48	-0.76	-0.98	0.2	-1.73	-1.45	-2.02	-1.6	0
gi|194041264|ref|XM_001926533.1|	194041264	XM_001926533.1	PREDICTED: Sus scrofa similar to Protein FAM116A (LOC100152812), mRNA	LOC100152812	NM_152678.2	201627	FAM116A	family with sequence similarity 116, member A	0	-0.45	-0.25	-0.35	-0.24	-0.72	-1.64	-2.04	-4.87	-5.96	0
gi|194041270|ref|XM_001926989.1|	194041270	XM_001926989.1	PREDICTED: Sus scrofa similar to protein tyrosine phosphatase, receptor type, G (LOC100153595), mRNA	LOC100153595	AK296327.1	5793	PTPRG	protein tyrosine phosphatase, receptor type, G	0	-1.76	-2.07	-2.45	-1.91	-2.27	-3.61	-4	-4.34	-4.42	0
gi|194041303|ref|XM_001927800.1|	194041303	XM_001927800.1	PREDICTED: Sus scrofa similar to SET domain containing 5 (LOC100152258), mRNA	LOC100152258	NM_001080517.1	55209	SETD5	SET domain containing 5	0	-0.18	-0.62	-1.05	-1.7	-2.01	-2.62	-3.3	-2.91	-3.22	0
gi|194041333|ref|XM_001926390.1|	194041333	XM_001926390.1	PREDICTED: Sus scrofa similar to Fanconi anemia D2 protein (LOC100155058), mRNA	LOC100155058	AK074406.1	2177	FANCD2	Fanconi anemia, complementation group D2	0	-0.54	-2.51	-3.93	-4.86	-3.41	-11	-4.47	-5.15	-11	0
gi|194041353|ref|XM_001926876.1|	194041353	XM_001926876.1	PREDICTED: Sus scrofa similar to rCG30323 (LOC100154663), mRNA	LOC100154663	AF244931.1	55764	IFT122	intraflagellar transport 122 homolog (Chlamydomonas)	0	0.11	0.08	-0.59	-1.15	-3.61	-2.17	-5.78	-3.87	-3.14	0
gi|194041357|ref|XM_001926917.1|	194041357	XM_001926917.1	PREDICTED: Sus scrofa similar to plexin D1 (LOC100152254), partial mRNA	LOC100152254	NM_015103.2	23129	PLXND1	plexin D1	0	-0.09	0.13	0.53	0.7	-1.69	-2.09	-1.95	-2.07	-2.5	0
gi|194041366|ref|XM_001924481.1|	194041366	XM_001924481.1	PREDICTED: Sus scrofa similar to Protein transport protein Sec61 subunit alpha isoform 1 (Sec61 alpha-1) (LOC100155306), mRNA	LOC100155306	AK074706.1	29927	SEC61A1	Sec61 alpha 1 subunit (S. cerevisiae)	0	-1.22	-1.21	-1.67	-1.65	-1.93	-2.28	-3	-4.32	-4.4	0
gi|194041368|ref|XM_001924555.1|	194041368	XM_001924555.1	PREDICTED: Sus scrofa similar to RuvB-like 1 (LOC100158123), mRNA	LOC100158123	NM_003707.2	8607	RUVBL1	RuvB-like 1 (E. coli)	0	0.58	0.24	-0.2	-0.66	0.7	-0.61	-0.95	-2.44	-1.66	0
gi|194041397|ref|XM_001928870.1|	194041397	XM_001928870.1	PREDICTED: Sus scrofa similar to Nuclear factor, interleukin 3 regulated (LOC100153822), mRNA	LOC100153822	NM_005384.2	4783	NFIL3	nuclear factor, interleukin 3 regulated	0	0.2	-0.24	-1.07	-1.15	-0.82	-1.93	-2.18	-1.17	-2.44	0
gi|194041401|ref|XM_001926294.1|	194041401	XM_001926294.1	PREDICTED: Sus scrofa similar to Receptor tyrosine kinase-like orphan receptor 2 (LOC100154208), mRNA	LOC100154208	BC130522.1	4920	ROR2	receptor tyrosine kinase-like orphan receptor 2	0	-4.85	-3.62	-4	-10.34	-3.34	-10.34	-10.34	-10.34	-10.34	0
gi|194041403|ref|XM_001926415.1|	194041403	XM_001926415.1	PREDICTED: Sus scrofa similar to serine palmitoyltransferase, long chain base subunit 1 (LOC100154628), mRNA	LOC100154628	AK291546.1	10558	SPTLC1	serine palmitoyltransferase, long chain base subunit 1	0	0.16	0.2	0.06	0.72	-1.28	-1.69	-9.61	-3.75	-9.61	0
gi|194041408|ref|XM_001929007.1|	194041408	XM_001929007.1	PREDICTED: Sus scrofa similar to CDC42 binding protein kinase alpha (DMPK-like) (LOC100157850), mRNA	LOC100157850	BC136333.1	8476	CDC42BPA	CDC42 binding protein kinase alpha (DMPK-like)	0	-2.21	-2.11	-2.52	-3.46	-10.61	-10.61	-10.61	-10.61	-10.61	0
gi|194041423|ref|XM_001926755.1|	194041423	XM_001926755.1	PREDICTED: Sus scrofa similar to exportin 7 (LOC100153229), mRNA	LOC100153229	NM_001100162.1	23039	XPO7	exportin 7	0	-1.14	-0.64	-0.69	-0.85	-1.53	-1.92	-2.19	-1.8	-1.82	0
gi|194041438|ref|XM_001927745.1|	194041438	XM_001927745.1	PREDICTED: Sus scrofa similar to leucine-rich repeat LGI family, member 3 (LOC100152437), mRNA	LOC100152437	AF467956.1	203190	LGI3	leucine-rich repeat LGI family, member 3	0	-0.88	-0.89	-1.86	-2.64	-10.79	-10.79	-10.79	-4.35	-10.79	0
gi|194041482|ref|XM_001926801.1|	194041482	XM_001926801.1	PREDICTED: Sus scrofa similar to Ectonucleoside triphosphate diphosphohydrolase 4 (NTPDase 4) (Uridine-diphosphatase) (UDPase) (Lysosomal apyrase-like protein of 70 kDa) (LOC100155254), mRNA	LOC100155254	AJ131358.1	9583	ENTPD4	ectonucleoside triphosphate diphosphohydrolase 4	0	0.67	0.77	0.41	-0.08	-0.5	-1.52	-1.09	-1.64	-2.83	0
gi|194041484|ref|XM_001929122.1|	194041484	XM_001929122.1	PREDICTED: Sus scrofa similar to Mitochondrial carrier domain containing protein RGD1359361 (LOC100153622), mRNA	LOC100153622	NM_016612.2	51312	SLC25A37	solute carrier family 25, member 37	0	-0.06	-0.17	-1.09	-0.87	-1.41	-2.49	-4.51	-2.6	-1.41	0
gi|194041507|ref|XM_001924700.1|	194041507	XM_001924700.1	PREDICTED: Sus scrofa neurofilament light polypeptide (LOC733642), mRNA	LOC733642	NM_006158.3	4747	NEFL	neurofilament, light polypeptide	0	-4.3	-4.24	-5.03	-5.54	-13.11	-6.42	-6.57	-13.11	-13.11	0
gi|194041518|ref|XM_001927414.1|	194041518	XM_001927414.1	PREDICTED: Sus scrofa protein phosphatase 2 (formerly 2A), regulatory subunit B, alpha isoform (PPP2R2A), mRNA	PPP2R2A					0	0.17	-0.36	-0.4	-0.71	-0.65	-0.15	-0.44	-2.4	-1.72	0
gi|194041520|ref|XM_001927592.1|	194041520	XM_001927592.1	PREDICTED: Sus scrofa similar to BCL2/adenovirus E1B 19kDa interacting protein 3-like (LOC100152675), mRNA	LOC100152675	BC001559.1	665	BNIP3L	BCL2/adenovirus E1B 19kDa interacting protein 3-like	0	-1.61	-1.28	-1.51	-1.83	-3.53	-3.77	-3.58	-3.14	-3.97	0
gi|194041599|ref|XM_001927927.1|	194041599	XM_001927927.1	PREDICTED: Sus scrofa similar to zinc finger protein, subfamily 1A, 5 (LOC100153217), mRNA	LOC100153217	AK122899.1	64376	IKZF5	IKAROS family zinc finger 5 (Pegasus)	0	0.02	-0.94	-0.88	0.15	-1.48	-0.97	-1.86	-1.72	-3.6	0
gi|194041609|ref|XM_001928028.1|	194041609	XM_001928028.1	PREDICTED: Sus scrofa similar to BUB3 budding uninhibited by benzimidazoles 3, transcript variant 1 (LOC100156053), mRNA	LOC100156053	NM_004725.3	9184	BUB3	budding uninhibited by benzimidazoles 3 homolog (yeast)	0	-1.78	-1.59	-2.33	-2.08	-2.18	-2.85	-3.5	-4.55	-4.42	0
gi|194041642|ref|XM_001924739.1|	194041642	XM_001924739.1	PREDICTED: Sus scrofa similar to Erythroid differentiation-related factor 1 (LOC100156269), partial mRNA	LOC100156269	AK314958.1	26098	C10orf137	chromosome 10 open reading frame 137	0	-0.81	-0.7	-0.26	-0.87	-1.69	-2.26	-2.35	-4.25	-2.44	0
gi|194041747|ref|XM_001926631.1|	194041747	XM_001926631.1	PREDICTED: Sus scrofa similar to TBC1 domain family member 12 (LOC100153334), partial mRNA	LOC100153334	NM_015188.1	23232	TBC1D12	TBC1 domain family, member 12	0	0.14	0.03	0.53	0.49	-1.78	-1.95	-2.64	-5.45	-4.15	0
gi|194041762|ref|XM_001927529.1|	194041762	XM_001927529.1	PREDICTED: Sus scrofa similar to pyrroline-5-carboxylate synthetase (LOC100151977), mRNA	LOC100151977	NM_001017423.1	5832	ALDH18A1	aldehyde dehydrogenase 18 family, member A1	0	-0.59	-0.76	-0.69	-0.87	-2.05	-3.88	-5.11	-6.04	-13.23	0
gi|194041780|ref|XM_001925192.1|	194041780	XM_001925192.1	PREDICTED: Sus scrofa similar to Transmembrane 9 superfamily member 3 precursor (SM-11044-binding protein) (EP70-P-iso) (LOC100157588), mRNA	LOC100157588	AK075093.1	56889	TM9SF3	transmembrane 9 superfamily member 3	0	-0.77	-0.89	-1	-0.92	-1	-2.2	-2.18	-2.98	-3.23	0
gi|194041802|ref|XM_001928911.1|	194041802	XM_001928911.1	PREDICTED: Sus scrofa similar to MMS19 nucleotide excision repair homolog (S. cerevisiae) (LOC100157608), mRNA	LOC100157608	AK298995.1	64210	MMS19	MMS19 nucleotide excision repair homolog (S. cerevisiae)	0	0.12	-0.26	-0.19	-0.25	-0.35	-0.7	-1.65	-1.58	-2.18	0
gi|194041824|ref|XM_001929141.1|	194041824	XM_001929141.1	PREDICTED: Sus scrofa similar to growth inhibition and differentiation related protein 86 (LOC100151975), mRNA	LOC100151975	NM_014472.4	27291	C10orf28	chromosome 10 open reading frame 28	0	-0.55	-0.8	-0.49	-0.57	-1.9	-1.48	-2.15	-2.46	-2.38	0
gi|194041849|ref|XM_001929511.1|	194041849	XM_001929511.1	PREDICTED: Sus scrofa similar to ER lipid raft associated 1 (LOC100154360), mRNA	ERLIN1					0	-0.37	-0.47	-0.77	-0.92	-2.31	-3.18	-3.12	-3.35	-2.82	0
gi|194041916|ref|XM_001925662.1|	194041916	XM_001925662.1	PREDICTED: Sus scrofa similar to paired-like homeodomain transcription factor 3 (LOC100154216), mRNA	LOC100154216	NM_005029.3	5309	PITX3	paired-like homeodomain 3	0	0.1	-0.08	0.03	-0.78	0.32	-2.12	-3.27	-9.81	-9.81	0
gi|194041942|ref|XM_001929119.1|	194041942	XM_001929119.1	PREDICTED: Sus scrofa similar to Sideroflexin-2 (LOC100152984), mRNA	LOC100152984	NM_178858.4	118980	SFXN2	sideroflexin 2	0	0.44	0.25	-0.69	0.05	-1.18	-9.77	-3.23	-9.77	-9.77	0
gi|194041958|ref|XM_001926739.1|	194041958	XM_001926739.1	PREDICTED: Sus scrofa similar to Polycomb group RING finger protein 6 (RING finger protein 134) (Mel18 and Bmi1-like RING finger) (LOC100152983), mRNA	LOC100152983	EU447006.1	84108	PCGF6	polycomb group ring finger 6	0	1.59	0.09	-0.68	-0.87	-2.02	-0.34	-1.48	-8.02	-8.02	0
gi|194042005|ref|XM_001924560.1|	194042005	XM_001924560.1	PREDICTED: Sus scrofa similar to X-prolyl aminopeptidase (aminopeptidase P) 1, soluble (LOC100152688), mRNA	LOC100152688	NM_001167604.1	7511	XPNPEP1	X-prolyl aminopeptidase (aminopeptidase P) 1, soluble	0	-0.21	0.08	0.13	-0.41	-1.41	-2.02	-1.84	-0.78	-1.25	0
gi|194042016|ref|XM_001926579.1|	194042016	XM_001926579.1	PREDICTED: Sus scrofa similar to Structural maintenance of chromosomes protein 3 (Chondroitin sulfate proteoglycan 6) (Chromosome-associated polypeptide) (hCAP) (Bamacan) (Basement membrane-associated chondroitin proteoglycan) (LOC100151864), mRNA	LOC100151864	NM_005445.3	9126	SMC3	structural maintenance of chromosomes 3	0	-1.72	-1.39	-1.66	-1.52	-2.25	-3.17	-2.76	-5.28	-6.18	0
gi|194042042|ref|XM_001928695.1|	194042042	XM_001928695.1	PREDICTED: Sus scrofa similar to transcription factor 7-like 2 (T-cell specific, HMG-box) (LOC100153922), mRNA	TCF7L2	NM_030756.4	6934	TCF7L2	transcription factor 7-like 2 (T-cell specific, HMG-box)	0	-0.48	-0.88	-0.34	-1.12	-3.52	-4	-4.31	-5.56	-6.64	0
gi|194042046|ref|XM_001928978.1|	194042046	XM_001928978.1	PREDICTED: Sus scrofa similar to caspase 7 (LOC100156777), mRNA	LOC100156777	U67206.1	840	CASP7	caspase 7, apoptosis-related cysteine peptidase	0	-0.51	-0.61	-0.15	-0.4	-1.41	-1.52	-1.76	-1.09	-2.38	0
gi|194042103|ref|XM_001927541.1|	194042103	XM_001927541.1	PREDICTED: Sus scrofa similar to PDZ domain containing 8 (LOC100153734), mRNA	LOC100153734	NM_173791.3	118987	PDZD8	PDZ domain containing 8	0	-0.86	-0.58	-0.94	-0.64	-0.58	-1.78	-2.81	-3.15	-3.55	0
gi|194042123|ref|XM_001928298.1|	194042123	XM_001928298.1	PREDICTED: Sus scrofa similar to nanos homolog 1 (LOC100157783), mRNA	LOC100157783	BC156179.1	340719	NANOS1	nanos homolog 1 (Drosophila)	0	1.08	-0.05	-0.92	-2.69	-2.26	-9.26	-1.73	-9.26	-3.48	0
gi|194042125|ref|XM_001928342.1|	194042125	XM_001928342.1	PREDICTED: Sus scrofa similar to LOC506564 protein (LOC100156570), mRNA	LOC100156570	NM_003750.2	8661	EIF3A	eukaryotic translation initiation factor 3, subunit A	0	-0.46	-0.42	-0.47	-0.42	-0.74	-0.66	-0.96	-3.38	-3.39	0
gi|194042127|ref|XM_001928421.1|	194042127	XM_001928421.1	PREDICTED: Sus scrofa hypothetical protein LOC100155371 (LOC100155371), mRNA	LOC100155371	AK293136.1	404636	FAM45A	family with sequence similarity 45, member A	0	0.28	0.01	-0.13	-0.22	-0.98	-0.44	-1.01	-1.75	-1.14	0
gi|194042135|ref|XM_001928584.1|	194042135	XM_001928584.1	PREDICTED: Sus scrofa similar to G protein-coupled receptor kinase 5 (G protein-coupled receptor kinase GRK5) (LOC100152937), mRNA	LOC100152937	NM_005308.2	2869	GRK5	G protein-coupled receptor kinase 5	0	0.97	0.43	0.15	-0.41	-2.05	-0.56	-2.25	-2.5	-1.41	0
gi|194042143|ref|XM_001927456.1|	194042143	XM_001927456.1	PREDICTED: Sus scrofa inositol polyphosphate-5-phosphatase F (INPP5F), mRNA	INPP5F	NM_014937.2	22876	INPP5F	inositol polyphosphate-5-phosphatase F	0	-1.12	-0.8	-0.5	-1.08	-2.23	-2.95	-3.26	-3.19	-4	0
gi|194042161|ref|XM_001925705.1|	194042161	XM_001925705.1	PREDICTED: Sus scrofa similar to Non-SMC element 4 homolog A (S. cerevisiae) (LOC100153999), mRNA	LOC100153999	AK222487.1	54780	NSMCE4A	non-SMC element 4 homolog A (S. cerevisiae)	0	-2.69	-2.25	-2.72	-2.57	-2.03	-3.48	-4.86	-12.39	-12.39	0
gi|194042190|ref|XM_001924717.1|	194042190	XM_001924717.1	PREDICTED: Sus scrofa similar to placenta-specific 9 (LOC100155282), mRNA	LOC100155282					0	0.46	-0.06	-1.41	-1.32	-1.41	-2.3	-4.23	-4.4	-3.56	0
gi|194042261|ref|XM_001925951.1|	194042261	XM_001925951.1	PREDICTED: Sus scrofa similar to PDZ-LIM protein cypher3s, transcript variant 2 (LOC100151883), mRNA	LOC100151883	NM_001080116.1	11155	LDB3	LIM domain binding 3	0	-1.65	0.26	1.37	1.01	-0.14	-8.14	-8.14	-8.14	-8.14	0
gi|194042273|ref|XM_001927415.1|	194042273	XM_001927415.1	PREDICTED: Sus scrofa similar to bone morphogenetic protein receptor, type IA (LOC100153524), mRNA	LOC100153524	BC028383.1	657	BMPR1A	bone morphogenetic protein receptor, type IA	0	-0.38	-0.35	-0.27	-0.59	-0.37	-1.6	-1.06	-4.57	-3.43	0
gi|194042287|ref|XM_001927955.1|	194042287	XM_001927955.1	PREDICTED: Sus scrofa similar to heterogeneous nuclear ribonucleoprotein H3 (LOC100155513), mRNA	LOC100155513	NM_021644.3	3189	HNRNPH3	heterogeneous nuclear ribonucleoprotein H3 (2H9)	0	-0.46	-0.22	0.31	0.18	-0.73	-2.21	-1.55	-3.42	-3	0
gi|194042293|ref|XM_001925632.1|	194042293	XM_001925632.1	PREDICTED: Sus scrofa similar to DNA2-like helicase (DNA replication ATP-dependent helicase-like homolog) (LOC100153906), mRNA	LOC100153906	NM_001080449.1	1763	DNA2	DNA replication helicase 2 homolog (yeast)	0	-0.3	-1.09	-3.61	-0.93	-2.95	-9.95	-9.95	-9.95	-9.95	0
gi|194042295|ref|XM_001928522.1|	194042295	XM_001928522.1	PREDICTED: Sus scrofa similar to cell-cycle and apoptosis regulatory protein 1 (LOC100151881), mRNA	LOC100151881	AK298004.1	55749	CCAR1	cell division cycle and apoptosis regulator 1	0	-0.91	-0.71	-0.66	-0.97	-0.86	-2.67	-1.74	-1.86	-2.98	0
gi|194042303|ref|XM_001928772.1|	194042303	XM_001928772.1	PREDICTED: Sus scrofa similar to DEAD (Asp-Glu-Ala-Asp) box polypeptide 21 (LOC100153111), mRNA	LOC100153111	NM_004728.2	9188	DDX21	DEAD (Asp-Glu-Ala-Asp) box polypeptide 21	0	0.77	0.37	0.19	0.3	0.14	0.01	-0.68	-3.5	-3.27	0
gi|194042305|ref|XM_001928810.1|	194042305	XM_001928810.1	PREDICTED: Sus scrofa similar to KIF1 binding protein (LOC100151916), mRNA	LOC100151916	NM_015634.2	26128	KIAA1279	KIAA1279	0	0.86	0.5	0.57	0.57	-1.11	-0.52	-0.53	-4.37	-4.03	0
gi|194042311|ref|XM_001925999.1|	194042311	XM_001925999.1	PREDICTED: Sus scrofa similar to vacuolar protein sorting 26 (LOC100155086), mRNA	LOC100155086	NM_004896.3	9559	VPS26A	vacuolar protein sorting 26 homolog A (S. pombe)	0	-0.61	-0.83	-0.38	-0.75	-0.67	-0.77	-1.25	-0.89	-1.5	0
gi|194042327|ref|XM_001929082.1|	194042327	XM_001929082.1	PREDICTED: Sus scrofa similar to tetraspanin 15 (LOC100157123), mRNA	LOC100157123	NM_012339.3	23555	TSPAN15	tetraspanin 15	0	-0.88	-0.48	0.04	0.04	-1.09	-2.49	-2.64	-1.85	-2.8	0
gi|194042335|ref|XM_001929166.1|	194042335	XM_001929166.1	PREDICTED: Sus scrofa mitogen-activated protein kinase 8, transcript variant 1 (MAPK8), mRNA	MAPK8	AK292523.1	5599	MAPK8	mitogen-activated protein kinase 8	0	-1.18	-0.49	-0.91	-1.61	-1.4	-3.88	-2.87	-2.8	-9.99	0
gi|194042350|ref|XM_001924660.1|	194042350	XM_001924660.1	PREDICTED: Sus scrofa similar to chromosome 10 open reading frame 72 (LOC100157009), mRNA	LOC100157009	NM_001031746.3	196740	C10orf72	chromosome 10 open reading frame 72	0	1.34	1.05	0.48	0.19	-2.04	-2.42	-1.7	-2.66	-3.32	0
gi|194042396|ref|XM_001927868.1|	194042396	XM_001927868.1	PREDICTED: Sus scrofa similar to Zinc finger protein 22 (Zinc finger protein KOX15) (Krox-26 protein) (LOC100156567), mRNA	LOC100156567	NM_006963.4	7570	ZNF22	zinc finger protein 22 (KOX 15)	0	-2.77	-2.11	-2.68	-2.48	-2.43	-4.19	-2.59	-12.3	-12.3	0
gi|194042436|ref|XM_001925357.1|	194042436	XM_001925357.1	PREDICTED: Sus scrofa similar to 3-phosphoadenosine 5-phosphosulfate synthase 2 (LOC100156262), mRNA	LOC100156262	NM_004670.3	9060	PAPSS2	3'-phosphoadenosine 5'-phosphosulfate synthase 2	0	-3.09	-2.89	-5.04	-3.01	-4.38	-11.38	-11.38	-11.38	-11.38	0
gi|194042440|ref|XM_001928136.1|	194042440	XM_001928136.1	PREDICTED: Sus scrofa similar to MMAC1 (LOC100156264), mRNA	PTEN					0	-1	-1.23	-1.27	-1.51	-1.09	-1.37	-2.31	-3.6	-3.63	0
gi|194042469|ref|XM_001928931.1|	194042469	XM_001928931.1	PREDICTED: Sus scrofa similar to M-phase phosphoprotein 1 (LOC100155885), mRNA	LOC100155885	NM_016195.2	9585	KIF20B	kinesin family member 20B	0	0.79	0.12	-0.13	0.36	-10.75	-2.48	-10.75	-10.75	-10.75	0
gi|194042472|ref|XM_001924771.1|	194042472	XM_001924771.1	PREDICTED: Sus scrofa similar to Ribonuclease P protein subunit p30 (RNaseP protein p30) (RNase P subunit 2) (LOC100156540), mRNA	LOC100156540	NM_006413.4	10556	RPP30	ribonuclease P/MRP 30kDa subunit	0	0.54	0.43	0.7	1	0.51	-0.79	-0.48	-2.21	-2.36	0
gi|194042482|ref|XM_001925217.1|	194042482	XM_001925217.1	PREDICTED: Sus scrofa similar to TATA-binding protein-associated factor 172 (ATP-dependent helicase BTAF1) (TBP-associated factor 172) (TAF-172) (TAF(II)170) (B-TFIID transcription factor-associated 170 kDa subunit) (LOC100156116), mRNA	LOC100156116	NM_003972.2	9044	BTAF1	BTAF1 RNA polymerase II, B-TFIID transcription factor-associated, 170kDa (Mot1 homolog, S. cerevisiae)	0	-1.86	-1.34	-1.91	-1.51	-1.37	-2.32	-3.52	-5.04	-4.63	0
gi|194042517|ref|XM_001928721.1|	194042517	XM_001928721.1	PREDICTED: Sus scrofa similar to Leucine-rich glioma-inactivated protein 1 precursor (Epitempin-1) (LOC100157335), mRNA	LOC100157335	NM_005097.2	9211	LGI1	leucine-rich, glioma inactivated 1	0	0.96	0.81	0.41	-0.15	-2.49	-2.7	-9.81	-3.95	-3.44	0
gi|194042530|ref|XM_001925190.1|	194042530	XM_001925190.1	PREDICTED: Sus scrofa similar to HEAT repeat-containing protein 1 (Protein BAP28) (LOC100154560), mRNA	LOC100154560	BC150614.1	55127	HEATR1	HEAT repeat containing 1	0	-0.35	-1.12	-1.84	-1.44	-1.74	-1.23	-3.38	-9.92	-9.92	0
gi|194042587|ref|XM_001928493.1|	194042587	XM_001928493.1	PREDICTED: Sus scrofa similar to SPA-1-like 2 (LOC100158048), mRNA	LOC100158048	NM_020808.3	57568	SIPA1L2	signal-induced proliferation-associated 1 like 2	0	-1.45	-0.66	-1.1	-1.22	-2.6	-3.49	-3.84	-3.86	-3.31	0
gi|194042611|ref|XM_001927098.1|	194042611	XM_001927098.1	PREDICTED: Sus scrofa similar to Uncharacterized protein C1orf198 homolog (LOC100155899), mRNA	LOC100155899	NM_032800.2	84886	C1orf198	chromosome 1 open reading frame 198	0	-2.54	-3.44	-4.09	-3.13	-4.02	-4.6	-12.02	-12.02	-12.02	0
gi|194042624|ref|XM_001927934.1|	194042624	XM_001927934.1	PREDICTED: Sus scrofa similar to Uncharacterized protein KIAA0133 (LOC100157881), mRNA	LOC100157881	NM_014777.2	9816	URB2	URB2 ribosome biogenesis 2 homolog (S. cerevisiae)	0	1.02	0.79	1.14	0.97	0.93	-1.21	-0.43	-3.33	-2.98	0
gi|194042632|ref|XM_001928164.1|	194042632	XM_001928164.1	PREDICTED: Sus scrofa similar to nucleoporin 133kDa (LOC100153047), mRNA	LOC100153047	NM_018230.2	55746	NUP133	nucleoporin 133kDa	0	-0.91	-0.33	-0.84	-1.1	-1.44	-2.17	-4.2	-11.73	-4.94	0
gi|194042649|ref|XM_001928781.1|	194042649	XM_001928781.1	PREDICTED: Sus scrofa similar to BMS1-like, ribosome assembly protein (LOC100157879), mRNA	LOC100157879	NM_014753.3	9790	BMS1	BMS1 homolog, ribosome assembly protein (yeast)	0	-0.74	-0.62	-0.79	-1.11	-0.93	-0.79	-1.34	-4.82	-4.22	0
gi|194042680|ref|XM_001929224.1|	194042680	XM_001929224.1	PREDICTED: Sus scrofa similar to Protein FAM13C1 (LOC100151846), mRNA	LOC100151846	AL834339.1	84457	PHYHIPL	phytanoyl-CoA 2-hydroxylase interacting protein-like	0	0.38	0.44	-0.33	0.8	0.42	-2.34	-1.91	-1.67	-1.33	0
gi|194042713|ref|XM_001925540.1|	194042713	XM_001925540.1	PREDICTED: Sus scrofa similar to nuclear receptor binding factor 2 (LOC100157738), mRNA	LOC100157738	NM_030759.3	29982	NRBF2	nuclear receptor binding factor 2	0	-0.88	-0.75	-0.9	-1.52	-2.05	-1.55	-2.4	-2.33	-2.73	0
gi|194042725|ref|XM_001925659.1|	194042725	XM_001925659.1	PREDICTED: Sus scrofa similar to MGC165949 protein (LOC100158143), mRNA	LOC100158143	NM_001001330.1	221035	REEP3	receptor accessory protein 3	0	-1.8	-1.05	-1.61	-1.72	-2.06	-2.65	-3.6	-3.13	-3.86	0
gi|194042747|ref|XM_001927343.1|	194042747	XM_001927343.1	PREDICTED: Sus scrofa similar to trypsin domain containing 1 (predicted) (LOC100157601), mRNA	LOC100157601	NM_173555.2	219743	TYSND1	trypsin domain containing 1	0	-0.4	-0.28	0.32	-0.31	-0.6	-1.59	-9.69	-9.69	-9.69	0
gi|194042813|ref|XM_001928193.1|	194042813	XM_001928193.1	PREDICTED: Sus scrofa similar to SEC24-related protein C (LOC100152996), mRNA	LOC100152996	NM_004922.2	9632	SEC24C	SEC24 family, member C (S. cerevisiae)	0	0.47	0.07	0.45	1.1	0.56	-0.01	-0.67	-3.54	-4.95	0
gi|194042819|ref|XM_001928170.1|	194042819	XM_001928170.1	PREDICTED: Sus scrofa similar to Zinc finger SWIM domain-containing protein KIAA0913 (LOC100154207), mRNA	LOC100154207	NM_015037.2	23053	KIAA0913	KIAA0913	0	-0.69	-0.02	0.21	-0.44	-1.03	-1.16	-1.11	-1.6	-2.12	0
gi|194042821|ref|XM_001928374.1|	194042821	XM_001928374.1	PREDICTED: Sus scrofa similar to N-deacetylase/N-sulfotransferase (heparan glucosaminyl) 2 (LOC100151795), mRNA	LOC100151795	NM_003635.3	8509	NDST2	N-deacetylase/N-sulfotransferase (heparan glucosaminyl) 2	0	-0.12	-0.2	0.26	0.03	-1.42	-1.94	-2.71	-5.52	-5.6	0
gi|194042827|ref|XM_001925607.1|	194042827	XM_001925607.1	PREDICTED: Sus scrofa similar to adenosine kinase (LOC100154626), partial mRNA	LOC100154626	AK290633.1	132	ADK	adenosine kinase	0	0.43	-0.77	-1.7	-1.52	-0.35	-0.7	-1.73	-2.81	-2.3	0
gi|194042829|ref|XM_001928949.1|	194042829	XM_001928949.1	PREDICTED: Sus scrofa similar to MYST histone acetyltransferase (monocytic leukemia) 4 (LOC100156636), mRNA	LOC100156636	NM_012330.2	23522	MYST4	MYST histone acetyltransferase (monocytic leukemia) 4	0	-2.09	-1.76	-2	-2.3	-3.59	-4.17	-2.2	-5.72	-3.35	0
gi|194042857|ref|XM_001927712.1|	194042857	XM_001927712.1	PREDICTED: Sus scrofa similar to DEAD (Asp-Glu-Ala-Asp) box polypeptide 55 (LOC100157342), mRNA	LOC100157342	AK307384.1	57696	DDX55	DEAD (Asp-Glu-Ala-Asp) box polypeptide 55	0	0.13	0.1	0.36	0.54	-0.82	-0.93	-1.52	-1.92	-2.43	0
gi|194042863|ref|XM_001925377.1|	194042863	XM_001925377.1	PREDICTED: Sus scrofa similar to SET domain containing (lysine methyltransferase) 8 (LOC100157725), mRNA	LOC100157725	AK292645.1	387893	SETD8	SET domain containing (lysine methyltransferase) 8	0	0.57	0.51	0.33	-0.01	-0.97	-0.73	-1.03	-0.7	-0.64	0
gi|194042865|ref|XM_001925507.1|	194042865	XM_001925507.1	PREDICTED: Sus scrofa similar to Protein strawberry notch homolog 1 (Monocyte protein 3) (MOP-3) (LOC100158131), mRNA	LOC100158131	BC030544.1	55206	SBNO1	strawberry notch homolog 1 (Drosophila)	0	-1.63	-1.01	-0.98	-0.74	-0.91	-3.16	-2.06	-1.66	-3.15	0
gi|194042888|ref|XM_001928789.1|	194042888	XM_001928789.1	PREDICTED: Sus scrofa similar to Coiled-coil domain-containing protein 60 (Aaa-protein) (Protein TSP-NY) (LOC100158164), mRNA	LOC100158164	NR_027918.1	84660	CCDC62	coiled-coil domain containing 62	0	0.74	0.78	-0.1	0.31	0.41	-0.56	-2.46	-9.99	-9.99	0
gi|194042900|ref|XM_001928903.1|	194042900	XM_001928903.1	PREDICTED: Sus scrofa similar to arginine/serine-rich coiled-coil 2 (LOC100154492), mRNA	LOC100154492	AB212664.1	65117	RSRC2	arginine/serine-rich coiled-coil 2	0	0.36	0.33	0.13	0.02	-0.87	-1.16	-1.08	-1.19	-1.32	0
gi|194042937|ref|XM_001929346.1|	194042937	XM_001929346.1	PREDICTED: Sus scrofa similar to carnitine deficiency-associated, expressed in ventricle 1 (LOC100156117), mRNA	LOC100156117	NM_001143779.1	28981	IFT81	intraflagellar transport 81 homolog (Chlamydomonas)	0	0.27	-0.04	-0.26	-0.68	-1.54	-1.53	-3.01	-2.51	-2.05	0
gi|194042941|ref|XM_001927111.1|	194042941	XM_001927111.1	PREDICTED: Sus scrofa similar to ATP-binding domain 1 family member C (LOC100158156), mRNA	LOC100158156	NM_001164372.1	51184	GPN3	GPN-loop GTPase 3	0	-0.24	-0.22	-0.57	-0.75	-1.54	-2.04	-1.45	-0.93	-1.24	0
gi|194042943|ref|XM_001929420.1|	194042943	XM_001929420.1	PREDICTED: Sus scrofa similar to Actin-related protein 2/3 complex subunit 3 (Arp2/3 complex 21 kDa subunit) (p21-ARC) (LOC100154518), mRNA	LOC100154518	NM_005719.2	10094	ARPC3	actin related protein 2/3 complex, subunit 3, 21kDa	0	-1	-0.07	-0.68	-1.27	-0.82	-2.02	-1.42	-1.35	-2.2	0
gi|194043006|ref|XM_001928075.1|	194043006	XM_001928075.1	PREDICTED: Sus scrofa similar to Zinc finger protein 38 (LOC100157987), mRNA	LOC100157987	BC047309.1	7589	ZSCAN21	zinc finger and SCAN domain containing 21	0	-1.1	-1.01	-0.86	-1.58	-1.91	-2.77	-3.78	-3.09	-4.02	0
gi|194043008|ref|XM_001928156.1|	194043008	XM_001928156.1	PREDICTED: Sus scrofa similar to Probable RNA-binding protein 19 (RNA-binding motif protein 19) (LOC100156794), mRNA	LOC100156794	EU831458.1	9904	RBM19	RNA binding motif protein 19	0	-0.92	-0.71	-1.19	-1.73	-1.03	-2.25	-3.04	-2.71	-3.05	0
gi|194043074|ref|XM_001928487.1|	194043074	XM_001928487.1	PREDICTED: Sus scrofa similar to cytochrome c oxidase subunit VIa polypeptide 1 (LOC100152232), mRNA	LOC100152232	NG_004806.3	285849	COX6A1P2	cytochrome c oxidase subunit VIa polypeptide 1 pseudogene 2	0	-1.33	-1.72	-2.04	-1.77	-2.43	-3.29	-3.75	-7.97	-7.62	0
gi|194043088|ref|XM_001928923.1|	194043088	XM_001928923.1	PREDICTED: Sus scrofa similar to Signal peptide peptidase-like 3 (SPP-like 3 protein) (Intramembrane protease 2) (IMP2) (Presenilin-like protein 4) (LOC100153784), mRNA	LOC100153784	NM_139015.3	121665	UNQ1887	signal peptide peptidase 3	0	0.11	0.05	-0.41	-0.6	-1.65	-2.48	-3.04	-3.71	-1.47	0
gi|194043102|ref|XM_001929184.1|	194043102	XM_001929184.1	PREDICTED: Sus scrofa similar to mevalonate kinase (LOC100152230), mRNA	LOC100152230	NM_000431.2	4598	MVK	mevalonate kinase	0	-0.3	-0.42	-1.03	-1.3	-2.36	-3.85	-2.84	-2.76	-3.16	0
gi|194043104|ref|XM_001929194.1|	194043104	XM_001929194.1	PREDICTED: Sus scrofa similar to cob(I)alamin adenosyltransferase (LOC100157459), mRNA	LOC100157459	AK312598.1	326625	MMAB	methylmalonic aciduria (cobalamin deficiency) cblB type	0	-0.19	-0.59	-0.77	-1.37	-1.82	-2.14	-4.61	-2.82	-2.36	0
gi|194043122|ref|XM_001929345.1|	194043122	XM_001929345.1	PREDICTED: Sus scrofa similar to Coronin-1C (Coronin-3) (hCRNN4) (LOC100156622), mRNA	LOC100156622	NM_014325.2	23603	CORO1C	coronin, actin binding protein, 1C	0	0.32	-0.04	-0.43	-0.53	-1.35	-2.25	-2.86	-4.2	-5.02	0
gi|194043124|ref|XM_001926685.1|	194043124	XM_001926685.1	PREDICTED: Sus scrofa similar to squamous cell carcinoma antigen recognized by T cells 3 (LOC100152586), mRNA	LOC100152586	AK290209.1	9733	SART3	squamous cell carcinoma antigen recognized by T cells 3	0	-1.48	-1.73	-2.15	-1.9	-2.06	-2.8	-3.22	-4.45	-3.6	0
gi|194043161|ref|XM_001927781.1|	194043161	XM_001927781.1	PREDICTED: Sus scrofa similar to Phosphatidylinositol transfer protein beta isoform (PtdIns transfer protein beta) (PtdInsTP) (PI-TP-beta) (LOC100157274), mRNA	LOC100157274	NM_012399.3	23760	PITPNB	phosphatidylinositol transfer protein, beta	0	-0.41	-1.24	-1.08	-1.38	-9.65	-2.22	-9.65	-9.65	-9.65	0
gi|194043187|ref|XM_001925978.1|	194043187	XM_001925978.1	PREDICTED: Sus scrofa similar to RNA-binding protein EWS (LOC100154022), partial mRNA	LOC100154022	NM_001163286.1	2130	EWSR1	Ewing sarcoma breakpoint region 1	0	0.72	0.33	-0.08	0	-0.28	-0.68	-1.85	-1.81	-2.49	0
gi|194043211|ref|XM_001929170.1|	194043211	XM_001929170.1	PREDICTED: Sus scrofa similar to opposite strand transcription unit to Stag3 (LOC100157272), mRNA	LOC100157272	NM_001037666.2	652968	GATSL3	GATS protein-like 3	0	-0.12	-0.09	-0.14	-0.58	-1.84	-1.74	-3.01	-1.67	-3.16	0
gi|194043213|ref|XM_001929197.1|	194043213	XM_001929197.1	PREDICTED: Sus scrofa similar to potential RabGAP (LOC100156070), mRNA	LOC100156070	CR626545.1	83874	TBC1D10A	TBC1 domain family, member 10A	0	-1.18	-1.5	-2.44	-1.63	-1.91	-0.94	-3.83	-4.51	-2.26	0
gi|194043247|ref|XM_001924702.1|	194043247	XM_001924702.1	PREDICTED: Sus scrofa similar to KIAA0852 protein (LOC100153895), mRNA	LOC100153895	BC136782.1	22880	MORC2	MORC family CW-type zinc finger 2	0	-0.58	-0.57	-0.2	-0.74	-1.75	-2.12	-1.5	-1.48	-1.24	0
gi|194043277|ref|XM_001927490.1|	194043277	XM_001927490.1	PREDICTED: Sus scrofa similar to eukaryotic translation initiation factor 4E nuclear import factor 1 (predicted) (LOC100152730), mRNA	LOC100152730	NM_019843.3	56478	EIF4ENIF1	eukaryotic translation initiation factor 4E nuclear import factor 1	0	-0.82	-0.62	-1.27	-1.34	-1.53	-2.75	-2.94	-2.56	-4.22	0
gi|194043291|ref|XM_001928076.1|	194043291	XM_001928076.1	PREDICTED: Sus scrofa similar to 14-3-3 protein eta (LOC100155504), mRNA	LOC100155504	BC003047.1	7533	YWHAH	tyrosine 3-monooxygenase/tryptophan 5-monooxygenase activation protein, eta polypeptide	0	-0.52	-0.72	-0.77	-0.34	-0.9	-1.69	-2.29	-1.77	-2.11	0
gi|194043345|ref|XM_001929374.1|	194043345	XM_001929374.1	PREDICTED: Sus scrofa similar to glutathione S-transferase, theta 3 (LOC100154313), mRNA	LOC100154313	AF435971.1	2952	GSTT1	glutathione S-transferase theta 1	0	-1.58	-0.95	-1.57	-1.94	-10.97	-10.97	-10.97	-3.78	-10.97	0
gi|194043361|ref|XM_001929445.1|	194043361	XM_001929445.1	PREDICTED: Sus scrofa similar to matrix metalloproteinase 11 preproprotein (LOC100153503), mRNA	LOC100153503	NM_005940.3	4320	MMP11	matrix metallopeptidase 11 (stromelysin 3)	0	-1.12	-0.52	-1.22	-1.35	0.2	-2.46	-4.19	-10.73	-10.73	0
gi|194043372|ref|XM_001926857.1|	194043372	XM_001926857.1	PREDICTED: Sus scrofa similar to KIAA0015 (LOC100152687), mRNA	LOC100152687	AK294557.1	9647	PPM1F	protein phosphatase 1F (PP2C domain containing)	0	-0.91	-0.68	-0.88	-2.1	-4.33	-4.81	-10.92	-4.05	-3.81	0
gi|194043378|ref|XM_001929539.1|	194043378	XM_001929539.1	PREDICTED: Sus scrofa similar to peptidylprolyl isomerase-like 2 (LOC100157972), mRNA	LOC100157972	NM_148175.2	23759	PPIL2	peptidylprolyl isomerase (cyclophilin)-like 2	0	0.5	1.26	0.3	0.61	0.58	-0.35	-3.31	-2.4	-2.47	0
gi|194043395|ref|XM_001929562.1|	194043395	XM_001929562.1	PREDICTED: Sus scrofa similar to hypermethylated in cancer 2 (LOC100151900), mRNA	LOC100151900	NM_015094.2	23119	HIC2	hypermethylated in cancer 2	0	-2.84	-2.74	-3.02	-4.34	-11.23	-11.23	-11.23	-11.23	-11.23	0
gi|194043403|ref|XM_001927226.1|	194043403	XM_001927226.1	PREDICTED: Sus scrofa similar to scavenger receptor class F, member 2 (LOC100153478), partial mRNA	LOC100153478	BC172421.1	91179	SCARF2	scavenger receptor class F, member 2	0	-2.55	-3.44	-9.85	-4.29	-2.85	-9.85	-9.85	-9.85	-9.85	0
gi|194043439|ref|XM_001927481.1|	194043439	XM_001927481.1	PREDICTED: Sus scrofa similar to Chria protein (LOC100152722), mRNA	LOC100152722	CR456503.1	7290	HIRA	HIR histone cell cycle regulation defective homolog A (S. cerevisiae)	0	-1.43	-1.02	-1.08	-1.29	-0.58	-2.08	-2.54	-3.45	-4.18	0
gi|194043488|ref|XM_001929645.1|	194043488	XM_001929645.1	PREDICTED: Sus scrofa similar to DiGeorge syndrome critical region gene 8 (LOC100153089), mRNA	LOC100153089	NM_022720.5	54487	DGCR8	DiGeorge syndrome critical region gene 8	0	-2.54	-2.93	-1.58	-3.45	-3.17	-3.66	-3.81	-11.34	-11.34	0
gi|194043494|ref|XM_001929653.1|	194043494	XM_001929653.1	PREDICTED: Sus scrofa similar to membrane-associated DHHC8 zinc finger protein (LOC100157140), mRNA	LOC100157140	BC053544.1	29801	ZDHHC8	zinc finger, DHHC-type containing 8	0	-0.7	-0.73	-0.13	-0.56	-2.1	-2.72	-3.29	-3.96	-4.94	0
gi|194043504|ref|XM_001927303.1|	194043504	XM_001927303.1	PREDICTED: Sus scrofa similar to KIAA1712 (LOC100155366), mRNA	LOC100155366	NM_001040157.2	80817	KIAA1712	KIAA1712	0	-0.94	-1.17	-1.05	-1.19	-3.35	-2.57	-4.13	-2.81	-3.56	0
gi|194043531|ref|XM_001926134.1|	194043531	XM_001926134.1	PREDICTED: Sus scrofa similar to chloride channel 3 (LOC100156049), mRNA	LOC100156049	NM_001829.2	1182	CLCN3	chloride channel 3	0	-0.82	-0.81	-0.6	-0.2	-0.26	-1.84	-1.03	-4.4	-2.67	0
gi|194043551|ref|XM_001927940.1|	194043551	XM_001927940.1	PREDICTED: Sus scrofa similar to Zinc finger protein 268 (Zinc finger protein 3) (HZF3) (LOC100154415), mRNA	LOC100154415	NM_001165881.1	10795	ZNF268	zinc finger protein 268	0	-0.06	-0.72	-0.85	-0.93	-2.38	-2.9	-5.55	-5.64	-6.3	0
gi|194043561|ref|XM_001926855.1|	194043561	XM_001926855.1	PREDICTED: Sus scrofa similar to zinc finger protein 140 (LOC100157639), mRNA	LOC100157639	AK122741.1	7699	ZNF140	zinc finger protein 140	0	-3.04	-1.85	-1.76	-1.69	-9.85	-1.93	-3.31	-9.85	-9.85	0
gi|194043591|ref|XM_001927268.1|	194043591	XM_001927268.1	PREDICTED: Sus scrofa similar to AUTS2-like protein (HBV X-transactivated gene 9 protein) (LOC100154804), partial mRNA	LOC100154804	NM_001142641.1	57666	FBRSL1	fibrosin-like 1	0	-0.16	-0.02	0.35	0.25	-1.36	-1.54	-1.56	-4.12	-3.1	0
gi|194043626|ref|XM_001926661.1|	194043626	XM_001926661.1	PREDICTED: Sus scrofa hypothetical protein LOC100158166 (LOC100158166), mRNA	LOC100158166	BC141805.1	144347	FAM101A	family with sequence similarity 101, member A	0	-3.7	-4.32	-4.84	-4.81	-3.86	-7.08	-13.18	-13.18	-13.18	0
gi|194043647|ref|XM_001925511.1|	194043647	XM_001925511.1	PREDICTED: Sus scrofa similar to Solute carrier family 35 member F5 (LOC100157997), mRNA	LOC100157997	AY358620.1	80255	SLC35F5	solute carrier family 35, member F5	0	-0.8	-0.75	-1.95	-1.2	-1.83	-1.73	-1.05	-1.34	-3.5	0
gi|194043649|ref|XM_001925542.1|	194043649	XM_001925542.1	PREDICTED: Sus scrofa similar to solute carrier family 35, member F5 (LOC100155601), mRNA	LOC100155601	AK315719.1	80255	SLC35F5	solute carrier family 35, member F5	0	-0.8	-0.95	-2.53	-0.45	-1.02	-0.8	-1.26	-9.61	-9.61	0
gi|194043689|ref|XM_001925487.1|	194043689	XM_001925487.1	PREDICTED: Sus scrofa similar to trinucleotide repeat containing 15 (LOC100155005), partial mRNA	LOC100155005	BC136251.1	26058	GIGYF2	GRB10 interacting GYF protein 2	0	0.34	0.26	0.2	0.37	-0.45	-0.04	-0.5	-3.99	-3.47	0
gi|194043780|ref|XM_001928673.1|	194043780	XM_001928673.1	PREDICTED: Sus scrofa similar to cytosolic NADP-isocitrate dehydrogenase (LOC100156501), mRNA	LOC100156501	NM_005896.2	3417	IDH1	isocitrate dehydrogenase 1 (NADP+), soluble	0	-4.2	-2.35	-4.67	-5.45	-3.41	-4.32	-4.47	-11	-11	0
gi|194043856|ref|XM_001928206.1|	194043856	XM_001928206.1	PREDICTED: Sus scrofa similar to Serine/threonine-protein kinase 16 (Protein kinase PKL12) (Myristoylated and palmitoylated serine/threonine-protein kinase) (MPSK) (TGF-beta-stimulated factor 1) (TSF-1) (hPSK) (LOC100153147), mRNA	LOC100153147	NM_001008910.2	8576	STK16	serine/threonine kinase 16	0	-1.2	-1.35	-1.28	-1.87	-3	-3.47	-3.43	-4.19	-3.93	0
gi|194043870|ref|XM_001924148.1|	194043870	XM_001924148.1	PREDICTED: Sus scrofa hypothetical protein LOC100153664 (LOC100153664), mRNA	LOC100153664	NM_001136530.1	5270	SERPINE2	serpin peptidase inhibitor, clade E (nexin, plasminogen activator inhibitor type 1), member 2	0	-0.88	-1.72	-2.26	-1.94	-3.24	-10.83	-10.83	-4.97	-10.83	0
gi|194043900|ref|XM_001924998.1|	194043900	XM_001924998.1	PREDICTED: Sus scrofa similar to Sjogren syndrome antigen B (autoantigen La) (LOC100152189), mRNA	LOC100152189	NM_003142.3	6741	SSB	Sjogren syndrome antigen B (autoantigen La)	0	-0.2	-0.63	-0.65	-0.82	-0.93	-2.07	-2.6	-3.43	-3.75	0
gi|194043908|ref|XM_001927890.1|	194043908	XM_001927890.1	PREDICTED: Sus scrofa similar to tousled-like kinase 1 (LOC100157412), mRNA	LOC100157412	BC032657.1	9874	TLK1	tousled-like kinase 1	0	-0.52	-0.62	-0.8	-0.86	-1.64	-3.3	-4.81	-5.7	-5.05	0
gi|194043922|ref|XM_001928628.1|	194043922	XM_001928628.1	PREDICTED: Sus scrofa similar to cell division cycle associated 7, transcript variant 1 (LOC100154583), mRNA	LOC100154583	NM_031942.4	83879	CDCA7	cell division cycle associated 7	0	0.31	-0.37	-1.14	-0.99	-2.92	-5.52	-11.63	-11.63	-5.85	0
gi|194043935|ref|XM_001924322.1|	194043935	XM_001924322.1	PREDICTED: Sus scrofa cholinergic receptor, nicotinic, alpha 1 (muscle) (CHRNA1), mRNA	CHRNA1	AK299445.1	1134	CHRNA1	cholinergic receptor, nicotinic, alpha 1 (muscle)	0	-1.37	-1.52	-2.75	-1.75	-3.45	-12.15	-3.81	-12.15	-12.15	0
gi|194043947|ref|XM_001925017.1|	194043947	XM_001925017.1	PREDICTED: Sus scrofa similar to homeobox D3 (LOC100157662), mRNA	LOC100157662	DQ896222.2	3232	HOXD3	homeobox D3	0	-1.64	-0.81	-0.45	-1.29	-4.19	-3.1	-3.15	-2.68	-3.31	0
gi|194043959|ref|XM_001927448.1|	194043959	XM_001927448.1	PREDICTED: Sus scrofa FK506 binding protein 7 (FKBP7), mRNA	FKBP7	AK292145.1	51661	FKBP7	FK506 binding protein 7	0	-1.27	-1.38	-2.1	-1.63	-2.44	-5.29	-4.5	-4.09	-4.09	0
gi|194043976|ref|XM_001928406.1|	194043976	XM_001928406.1	PREDICTED: Sus scrofa similar to sperm specific antigen 2 (LOC100155630), mRNA	LOC100155630	BC028706.2	6744	SSFA2	sperm specific antigen 2	0	-1.13	-1.61	-1.46	-1.48	-1.35	-1.57	-2.4	-11.26	-11.26	0
gi|194043997|ref|XM_001926349.1|	194043997	XM_001926349.1	PREDICTED: Sus scrofa similar to ORM1-like protein 1 (Adoplin-1) (LOC100155491), mRNA	LOC100155491	NM_001128150.1	94101	ORMDL1	ORM1-like 1 (S. cerevisiae)	0	-0.73	-0.53	-0.44	-0.83	-2.2	-3.07	-2.87	-4.26	-5.14	0
gi|194044022|ref|XM_001925846.1|	194044022	XM_001925846.1	PREDICTED: Sus scrofa similar to General transcription factor 3C polypeptide 3 (Transcription factor IIIC subunit gamma) (TF3C-gamma) (TFIIIC 102 kDa subunit) (TFIIIC102) (LOC100154260), mRNA	LOC100154260	NM_012086.2	9330	GTF3C3	general transcription factor IIIC, polypeptide 3, 102kDa	0	-2.92	-2.74	-1.97	-3.16	-2.41	-9.73	-9.73	-9.73	-9.73	0
gi|194044032|ref|XM_001928774.1|	194044032	XM_001928774.1	PREDICTED: Sus scrofa similar to coenzyme Q10 homolog B (LOC100152647), mRNA	LOC100152647	NM_025147.3	80219	COQ10B	coenzyme Q10 homolog B (S. cerevisiae)	0	0.28	0.06	0.26	0.5	0.2	-0.17	-0.39	-1.55	-2.75	0
gi|194044034|ref|XM_001928794.1|	194044034	XM_001928794.1	PREDICTED: Sus scrofa similar to splicing factor 3b, subunit 1 (LOC100157887), mRNA	LOC100157887	NM_012433.2	23451	SF3B1	splicing factor 3b, subunit 1, 155kDa	0	-1.49	-1.32	-1.66	-1.79	-1.86	-2	-2.92	-9	-10.67	0
gi|194044042|ref|XM_001926150.1|	194044042	XM_001926150.1	PREDICTED: Sus scrofa similar to Endonuclease VIII-like 3 (Nei-like 3) (DNA glycosylase FPG2) (LOC100156631), mRNA	LOC100156631	AK001720.1	55247	NEIL3	nei endonuclease VIII-like 3 (E. coli)	0	-2.36	-2.27	-1.76	-2.95	-9.85	-9.85	-9.85	-9.85	-9.85	0
gi|194044055|ref|XM_001926109.1|	194044055	XM_001926109.1	PREDICTED: Sus scrofa similar to SNX25 protein (LOC100157280), mRNA	LOC100157280	BC029868.1	83891	SNX25	sorting nexin 25	0	-0.06	-0.08	0.28	0.09	-0.99	-1.48	-1.37	-2.58	-3.53	0
gi|194044069|ref|XM_001925245.1|	194044069	XM_001925245.1	PREDICTED: Sus scrofa similar to Protein FAM149A (LOC100157674), mRNA	LOC100157674	BC142992.1	25854	FAM149A	family with sequence similarity 149, member A	0	-0.21	-0.11	-0.09	0.05	-3.04	-2.52	-1.63	-1.96	-4.25	0
gi|194044081|ref|XM_001925664.1|	194044081	XM_001925664.1	PREDICTED: Sus scrofa cellular disintegrin precursor (ADAM-9), mRNA	ADAM-9	NM_003816.2	8754	ADAM9	ADAM metallopeptidase domain 9 (meltrin gamma)	0	-1.14	-1.04	-1.48	-1.67	-0.68	-1.72	-2.62	-4.29	-4.37	0
gi|194044114|ref|XM_001924459.1|	194044114	XM_001924459.1	PREDICTED: Sus scrofa similar to hect domain and RLD 2 (LOC100152665), mRNA	LOC100152665	NM_004667.4	8924	HERC2	hect domain and RLD 2	0	-0.17	0.02	-0.16	0.09	-1.02	-0.97	-1.86	-2.02	-1.82	0
gi|194044123|ref|XM_001926788.1|	194044123	XM_001926788.1	PREDICTED: Sus scrofa similar to formin binding protein 3 (LOC100157937), mRNA	LOC100157937	NM_017892.3	55660	PRPF40A	PRP40 pre-mRNA processing factor 40 homolog A (S. cerevisiae)	0	0.78	0.68	0.6	0.69	-0.67	-0.68	-1.43	-3.1	-2.08	0
gi|194044132|ref|XM_001927798.1|	194044132	XM_001927798.1	PREDICTED: Sus scrofa similar to activin A type I receptor (LOC100152307), mRNA	LOC100152307	NM_001111067.2	90	ACVR1	activin A receptor, type I	0	-1.06	-1.04	-1.44	-1.22	-3.21	-2.99	-3.96	-2.52	-3.52	0
gi|194044138|ref|XM_001925924.1|	194044138	XM_001925924.1	PREDICTED: Sus scrofa similar to TRAF family member-associated NFKB activator (LOC100156366), partial mRNA	LOC100156366	NM_004180.2	10010	TANK	TRAF family member-associated NFKB activator	0	-0.01	0.19	0.18	-0.44	-0.52	-2.08	-1.55	-1.08	-1.95	0
gi|194044169|ref|XM_001924460.1|	194044169	XM_001924460.1	PREDICTED: Sus scrofa similar to CCR4-NOT transcription complex subunit 7 (CCR4-associated factor 1) (CAF-1) (BTG1-binding factor 1) (LOC100154442), mRNA	LOC100154442	NM_013354.5	29883	CNOT7	CCR4-NOT transcription complex, subunit 7	0	-0.78	-0.41	-0.48	-0.61	-0.78	-1.43	-1.39	-1.59	-2.26	0
gi|194044171|ref|XM_001924505.1|	194044171	XM_001924505.1	PREDICTED: Sus scrofa similar to platelet-derived growth factor receptor-like protein (LOC100152031), mRNA	LOC100152031	CR605626.1	5157	PDGFRL	platelet-derived growth factor receptor-like	0	2.49	0.34	-0.57	2.55	-0.84	-1.22	-8.65	-8.65	-8.65	0
gi|194044239|ref|XM_001927494.1|	194044239	XM_001927494.1	PREDICTED: Sus scrofa similar to minichromosome maintenance complex component 8 (LOC100154307), mRNA	LOC100154307	BC101056.1	84515	MCM8	minichromosome maintenance complex component 8	0	0.09	-0.12	-0.01	0.12	-0.72	-2.04	-1.61	-3.7	-3.77	0
gi|194044267|ref|XM_001925000.1|	194044267	XM_001925000.1	PREDICTED: Sus scrofa similar to isthmin 1 (LOC100154170), mRNA	LOC100154170	NM_080826.1	140862	ISM1	isthmin 1 homolog (zebrafish)	0	-5.11	-3.88	-3.85	-3.23	-4.02	-10.61	-10.61	-10.61	-10.61	0
gi|194044271|ref|XM_001926068.1|	194044271	XM_001926068.1	PREDICTED: Sus scrofa similar to ABT1-associated protein (LOC100155396), mRNA	LOC100155396	BC146542.1	51575	ESF1	ESF1, nucleolar pre-rRNA processing protein, homolog (S. cerevisiae)	0	-0.14	-0.31	-0.31	-0.2	-0.75	-2.75	-2.06	-2.73	-1.93	0
gi|194044285|ref|XM_001926002.1|	194044285	XM_001926002.1	PREDICTED: Sus scrofa similar to ribosome receptor (LOC100154945), mRNA	LOC100154945	NM_004587.2	6238	RRBP1	ribosome binding protein 1 homolog 180kDa (dog)	0	-0.74	-1.23	-1.74	-1.25	-3.94	-3.48	-4.22	-5.31	-11.75	0
gi|194044362|ref|XM_001926993.1|	194044362	XM_001926993.1	PREDICTED: Sus scrofa similar to GDNF-inducible zinc finger protein 1 (LOC100152798), mRNA	LOC100152798	AK314599.1	64412	GZF1	GDNF-inducible zinc finger protein 1	0	-0.18	-0.18	-0.02	0.61	-0.22	-0.17	-1.12	-3.73	-4.58	0
gi|194044388|ref|XM_001925195.1|	194044388	XM_001925195.1	PREDICTED: Sus scrofa similar to inosine triphosphatase, transcript variant 1 (LOC100157088), mRNA	LOC100157088	EF199841.1	3704	ITPA	inosine triphosphatase (nucleoside triphosphate pyrophosphatase)	0	0.03	-0.89	-0.96	-1.07	-0.97	-1.97	-1.54	-9.88	-9.88	0
gi|194044473|ref|XM_001926880.1|	194044473	XM_001926880.1	PREDICTED: Sus scrofa similar to E2F transcription factor 1 (LOC100153846), mRNA	LOC100153846	NM_005225.2	1869	E2F1	E2F transcription factor 1	0	-0.64	-0.61	-1.39	-1.15	-5.39	-11.39	-4.86	-11.39	-11.39	0
gi|194044493|ref|XM_001929279.1|	194044493	XM_001929279.1	PREDICTED: Sus scrofa similar to Nuclear receptor coactivator 6 (Amplified in breast cancer protein 3) (Cancer-amplified transcriptional coactivator ASC-2) (Activating signal cointegrator 2) (ASC-2) (Peroxisome proliferator-activated receptor-interacting	LOC100156283	NM_014071.2	23054	NCOA6	nuclear receptor coactivator 6	0	-0.43	-0.12	0.05	-0.43	-1.05	-1.3	-1.7	-3.22	-3.45	0
gi|194044495|ref|XM_001929295.1|	194044495	XM_001929295.1	PREDICTED: Sus scrofa similar to gamma-glutamyltransferase 7 (LOC100155077), mRNA	LOC100155077	NM_178026.2	2686	GGT7	gamma-glutamyltransferase 7	0	-0.12	-1.23	-1.35	-1.54	-3.81	-3.7	-9.81	-2.94	-9.81	0
gi|194044506|ref|XM_001927374.1|	194044506	XM_001927374.1	PREDICTED: Sus scrofa similar to RIKEN cDNA 0610038P03 (LOC100155469), mRNA	LOC100155469	BC151242.1	57644	MYH7B	myosin, heavy chain 7B, cardiac muscle, beta	0	0.75	0.3	-0.55	-0.69	-0.7	-1.49	-2.98	-11.68	-11.68	0
gi|194044570|ref|XM_001928614.1|	194044570	XM_001928614.1	PREDICTED: Sus scrofa similar to v-src sarcoma (Schmidt-Ruppin A-2) viral oncogene homolog (LOC100154503), mRNA	LOC100154503	BC051270.1	6714	SRC	v-src sarcoma (Schmidt-Ruppin A-2) viral oncogene homolog (avian)	0	-1.21	-1.26	-1.32	-1.17	-2.57	-3.66	-3.45	-5.13	-11.57	0
gi|194044597|ref|XM_001926862.1|	194044597	XM_001926862.1	PREDICTED: Sus scrofa similar to DNA topoisomerase I (LOC100155314), partial mRNA	LOC100155314	AK292943.1	7150	TOP1	topoisomerase (DNA) I	0	-0.29	-0.49	-0.82	-0.88	-0.99	-0.77	-1.54	-3.96	-3.34	0
gi|194044601|ref|XM_001924508.1|	194044601	XM_001924508.1	PREDICTED: Sus scrofa similar to Intraflagellar transport 52 homolog (Chlamydomonas) (LOC100157616), mRNA	LOC100157616	NM_016004.2	51098	IFT52	intraflagellar transport 52 homolog (Chlamydomonas)	0	-0.12	-0.7	-0.44	-0.77	-3.63	-1.94	-2.09	-4.77	-3.25	0
gi|194044605|ref|XM_001924436.1|	194044605	XM_001924436.1	PREDICTED: Sus scrofa similar to v-myb myeloblastosis viral oncogene homolog (avian)-like 2 (LOC100157175), mRNA	LOC100157175	AK314791.1	4605	MYBL2	v-myb myeloblastosis viral oncogene homolog (avian)-like 2	0	0.34	-0.17	-0.7	-1.39	-4.71	-4.6	-4.17	-10.71	-10.71	0
gi|194044686|ref|XM_001928889.1|	194044686	XM_001928889.1	PREDICTED: Sus scrofa similar to Acyl-coenzyme A thioesterase 8 (Choloyl-coenzyme A thioesterase) (Acyl-CoA thioesterase 8) (Peroxisomal acyl-coenzyme A thioester hydrolase 1) (PTE-1) (Peroxisomal long-chain acyl-CoA thioesterase 1) (HIV-Nef-associated ac	LOC100157173	BC117157.1	10005	ACOT8	acyl-CoA thioesterase 8	0	0	-0.19	-0.3	0.19	0.81	-1.12	-1.69	-1.95	-2.22	0
gi|194044714|ref|XM_001926634.1|	194044714	XM_001926634.1	PREDICTED: Sus scrofa similar to engulfment and cell motility 2 (LOC100153181), mRNA	LOC100153181	NM_133171.3	63916	ELMO2	engulfment and cell motility 2	0	-0.24	-0.41	-0.31	-0.71	-0.68	-0.31	-1.54	-10.77	-10.77	0
gi|194044732|ref|XM_001927204.1|	194044732	XM_001927204.1	PREDICTED: Sus scrofa similar to sulfatase 2 (LOC100152351), mRNA	LOC100152351	NM_001161841.1	55959	SULF2	sulfatase 2	0	-2.79	-1.69	-2.29	-1.6	-4.25	-5.34	-4.91	-6.07	-7.47	0
gi|194044778|ref|XM_001928109.1|	194044778	XM_001928109.1	PREDICTED: Sus scrofa similar to motile sperm domain containing 2 (LOC100153601), mRNA	LOC100153601	NM_152581.2	158747	MOSPD2	motile sperm domain containing 2	0	-0.88	-0.53	-0.52	-1.34	-1.4	-1.69	-2.15	-1.24	-1.46	0
gi|194044788|ref|XM_001928382.1|	194044788	XM_001928382.1	PREDICTED: Sus scrofa similar to FIGF protein (LOC100155670), mRNA	LOC100155670	BC027948.1	2277	FIGF	c-fos induced growth factor (vascular endothelial growth factor D)	0	1.07	0.92	1.53	0.97	0	0.1	0.18	-8.81	-8.81	0
gi|194044800|ref|XM_001924191.1|	194044800	XM_001924191.1	PREDICTED: Sus scrofa similar to SYAP1 protein (LOC100153861), mRNA	LOC100153861	AF168955.1	94056	SYAP1	synapse associated protein 1, SAP47 homolog (Drosophila)	0	-0.21	-0.23	0.17	-0.28	-1.57	-2.16	-1.89	-2.3	-2.15	0
gi|194044861|ref|XM_001927107.1|	194044861	XM_001927107.1	PREDICTED: Sus scrofa similar to NAD(P) dependent steroid dehydrogenase-like (LOC100157894), mRNA	LOC100157894					0	0.05	0.36	0	-0.66	-0.85	-2.3	-3.13	-2.95	-3.4	0
gi|194044921|ref|XM_001927440.1|	194044921	XM_001927440.1	PREDICTED: Sus scrofa similar to adenine nucleotide translocator 2 (LOC100158185), mRNA	LOC100158185	NM_001152.4	292	SLC25A5	solute carrier family 25 (mitochondrial carrier; adenine nucleotide translocator), member 5	0	-2.37	-2.2	-2.53	-2.72	-1.33	-2.92	-3.25	-4.33	-4.53	0
gi|194044925|ref|XM_001927734.1|	194044925	XM_001927734.1	PREDICTED: Sus scrofa similar to rab11 binding protein (LOC100153754), mRNA	LOC100153754	NM_019045.3	54521	WDR44	WD repeat domain 44	0	-0.5	-0.49	-1.27	-1.51	-2.7	-4.08	-3.36	-3.09	-3.06	0
gi|194044931|ref|XM_001924331.1|	194044931	XM_001924331.1	PREDICTED: Sus scrofa similar to THO complex 2 (LOC100154832), mRNA	LOC100154832	BC172220.1	57187	THOC2	THO complex 2	0	-1.47	-2.35	-2.26	-1.13	-1.53	-3.66	-3.22	-2.48	-4.56	0
gi|194044943|ref|XM_001926010.1|	194044943	XM_001926010.1	PREDICTED: Sus scrofa similar to immunoglobulin superfamily, member 1 (LOC100157227), mRNA	LOC100157227	NM_001555.3	3547	IGSF1	immunoglobulin superfamily, member 1	0	0.93	2.07	2.16	2.09	-1.23	-10.94	-10.94	-10.94	-10.94	0
gi|194044951|ref|XM_001925471.1|	194044951	XM_001925471.1	PREDICTED: Sus scrofa similar to glypican 4 (LOC100156029), mRNA	LOC100156029	BC017166.1	2239	GPC4	glypican 4	0	-1.05	-0.71	-1.32	-2.11	-3.07	-5.11	-4.68	-3.42	-4.16	0
gi|194044985|ref|XM_001927811.1|	194044985	XM_001927811.1	PREDICTED: Sus scrofa similar to neuroligin 3 (LOC100156236), mRNA	LOC100156236	NM_018977.3	54413	NLGN3	neuroligin 3	0	-2.12	-3.2	-2.68	-2.58	-4.61	-10.61	-10.61	-10.61	-10.61	0
gi|194044987|ref|XM_001927848.1|	194044987	XM_001927848.1	PREDICTED: Sus scrofa similar to mediator of RNA polymerase II transcription, subunit 12 homolog (LOC100157450), mRNA	LOC100157450	BC156136.1	9968	MED12	mediator complex subunit 12	0	-0.62	-0.51	-0.18	-0.22	-1.34	-2.7	-2.86	-5.01	-6.42	0
gi|194044991|ref|XM_001928070.1|	194044991	XM_001928070.1	PREDICTED: Sus scrofa similar to rCG36369 (LOC100155023), mRNA	LOC100155023	AL590764.3	158830	CXorf65	chromosome X open reading frame 65	0	0.19	0.05	-0.44	0.04	-1.06	-1.35	-1.56	-2.23	-2.53	0
gi|194045010|ref|XM_001928719.1|	194045010	XM_001928719.1	PREDICTED: Sus scrofa similar to ATP-binding cassette, sub-family B, member 7 (LOC100157043), mRNA	LOC100157043	NM_004299.3	22	ABCB7	ATP-binding cassette, sub-family B (MDR/TAP), member 7	0	-1.05	-0.63	-0.79	-1.17	-0.86	-0.89	-1.54	-1.53	-1.89	0
gi|194045068|ref|XM_001927105.1|	194045068	XM_001927105.1	PREDICTED: Sus scrofa similar to Sushi repeat-containing protein SRPX (LOC100156108), mRNA	LOC100156108	S82496.1	8406	SRPX	sushi-repeat-containing protein, X-linked	0	0.62	0.28	0.33	0.01	-1.57	-1.47	-2.91	-3.43	-2.02	0
gi|194045072|ref|XM_001927451.1|	194045072	XM_001927451.1	PREDICTED: Sus scrofa ornithine carbamoyltransferase (OTC), mRNA	OTC					0	2.06	1.17	-0.8	-3.47	-9.02	-9.02	-9.02	-9.02	-9.02	0
gi|194045094|ref|XM_001925372.1|	194045094	XM_001925372.1	PREDICTED: Sus scrofa similar to Peripheral plasma membrane protein CASK (hCASK) (Calcium/calmodulin-dependent serine protein kinase) (Lin-2 homolog) (LOC100153146), mRNA	LOC100153146	NM_001126055.2	8573	CASK	calcium/calmodulin-dependent serine protein kinase (MAGUK family)	0	0.08	-0.58	-1.33	-1.38	-2.81	-1.77	-2.16	-3.44	-2.61	0
gi|194045109|ref|XM_001927874.1|	194045109	XM_001927874.1	PREDICTED: Sus scrofa similar to FYVE, RhoGEF and PH domain containing 1 (LOC100152387), mRNA	LOC100152387	NM_004463.2	2245	FGD1	FYVE, RhoGEF and PH domain containing 1	0	-1.08	-1.14	-1.85	-2.04	-5.19	-3.98	-4.92	-5.91	-4.67	0
gi|194045111|ref|XM_001927898.1|	194045111	XM_001927898.1	PREDICTED: Sus scrofa similar to TSR2, 20S rRNA accumulation, homolog (S. cerevisiae) (LOC100157624), mRNA	LOC100157624	CR622248.1	90121	TSR2	TSR2, 20S rRNA accumulation, homolog (S. cerevisiae)	0	1.08	0.85	0.99	0.62	0.16	-1.08	-0.89	-2.02	-1.2	0
gi|194271212|gb|EU714326.1|	194271212	EU714326.1	Sus scrofa vascular endothelial growth factor receptor 2 mRNA, partial cds	KDR	NM_002253.2	3791	KDR	kinase insert domain receptor (a type III receptor tyrosine kinase)	0	-4.1	-2.78	-2.36	-1.84	-2.06	-2.23	-4.47	-11.58	-11.58	0
gi|194474049|ref|NM_001130531.1|	194474049	NM_001130531.1	Sus scrofa ADAM metallopeptidase domain 10 (ADAM10), mRNA	ADAM10	NM_001110.2	102	ADAM10	ADAM metallopeptidase domain 10	0	-2.54	-4.63	-2.68	-0.93	-1.32	-2.33	-10.02	-10.02	-10.02	0
gi|1955|emb|X17058.1|	1955	X17058.1	Sus scrofa mRNA for glucose transporte protein	SLC2A1	NM_006516.2	6513	SLC2A1	solute carrier family 2 (facilitated glucose transporter), member 1	0	-1.32	-1.43	-2.47	-2.02	-4.07	-3.71	-11.39	-11.39	-11.39	0
gi|196259975|ref|NM_001131045.1|	196259975	NM_001131045.1	Sus scrofa solute carrier family 39 (zinc transporter), member 7 (SLC39A7), mRNA	SLC39A7	NM_006979.2	7922	SLC39A7	solute carrier family 39 (zinc transporter), member 7	0	-0.89	-0.54	-0.79	-0.87	-1.73	-3.57	-4.68	-2.74	-3.24	0
gi|197717772|gb|EF113595.2|	197717772	EF113595.2	Sus scrofa selenoprotein N (Sepn1) mRNA, partial cds	LOC100037963	NM_206926.1	57190	SEPN1	selenoprotein N, 1	0	0.04	-0.05	0.29	0.39	-1.54	-2.44	-2.9	-5.91	-6.99	0
gi|198282078|ref|NM_001134823.1|	198282078	NM_001134823.1	Sus scrofa selenoprotein P (SEPP1), mRNA	SEPP1	NM_005410.2	6414	SEPP1	selenoprotein P, plasma, 1	0	0.19	0.08	-0.23	0.25	-1.02	-1.28	-1.73	-5.63	-6.55	0
gi|19919837|gb|AF490841.1|	19919837	AF490841.1	Sus scrofa glutaminase mRNA, partial cds	GLS	AF097492.1	2744	GLS	glutaminase	0	-0.28	-1.24	-1.74	0.11	-2	-2.36	-3.25	-8.25	-6.52	0
gi|201066355|ref|NM_001134967.1|	201066355	NM_001134967.1	Sus scrofa EPH receptor A4 (EPHA4), mRNA	EPHA4	NM_004438.3	2043	EPHA4	EPH receptor A4	0	-3.45	-3.11	-4.18	-3.37	-10.52	-10.52	-10.52	-10.52	-10.52	0
gi|2035|emb|X16638.1|	2035	X16638.1	Pig pgd mRNA for 6-phosphogluconate dehydrogenase (EC. 1.1.1.44)	PGD	AK290404.1	5226	PGD	phosphogluconate dehydrogenase	0	-1.27	-1.1	-1.55	-1.77	-2.88	-3.78	-4.09	-12.8	-12.8	0
gi|208610189|ref|NM_001135680.1|	208610189	NM_001135680.1	Sus scrofa ubiquitin specific peptidase 7 (herpes virus-associated) (USP7), mRNA	USP7	NM_003470.2	7874	USP7	ubiquitin specific peptidase 7 (herpes virus-associated)	0	-1.11	-1.34	-1.61	-1.68	-1	-1.34	-1.32	-2.65	-2.01	0
gi|212549612|ref|NM_001137623.1|	212549612	NM_001137623.1	Sus scrofa solute carrier family 30 (zinc transporter), member 6 (SLC30A6), mRNA	SLC30A6	NM_017964.2	55676	SLC30A6	solute carrier family 30 (zinc transporter), member 6	0	-0.94	-1.13	-0.35	-0.58	-0.53	-2.81	-3.7	-10.23	-10.23	0
gi|212549616|ref|NM_001137625.1|	212549616	NM_001137625.1	Sus scrofa ASF1 anti-silencing function 1 homolog B (S. cerevisiae) (ASF1B), mRNA	ASF1B	NM_018154.2	55723	ASF1B	ASF1 anti-silencing function 1 homolog B (S. cerevisiae)	0	-0.7	-1.81	-1.04	-1.34	-4.02	-10.61	-4.07	-10.61	-10.61	0
gi|212549618|ref|NM_001137627.1|	212549618	NM_001137627.1	Sus scrofa ERO1-like (S. cerevisiae) (ERO1L), mRNA	ERO1L	AK292839.1	30001	ERO1L	ERO1-like (S. cerevisiae)	0	-1.48	-2.33	-1.39	-1.68	-2.05	-10.05	-10.05	-10.05	-10.05	0
gi|212549642|ref|NM_001137631.1|	212549642	NM_001137631.1	Sus scrofa NCK adaptor protein 2 (NCK2), mRNA	NCK2	NM_001004720.1	8440	NCK2	NCK adaptor protein 2	0	-1.17	-0.63	0.32	-0.75	-1.75	-3.45	-2.44	-9.56	-3.78	0
gi|212549652|ref|NM_001137634.1|	212549652	NM_001137634.1	Sus scrofa vacuolar protein sorting 26 homolog B (S. pombe) (VPS26B), mRNA	VPS26B	BC014128.2	112936	VPS26B	vacuolar protein sorting 26 homolog B (S. pombe)	0	-1.22	-1.81	-1.84	-0.92	-0.67	-1.82	-3.06	-10.92	-10.92	0
gi|212549654|ref|NM_001137635.1|	212549654	NM_001137635.1	Sus scrofa POT1 protection of telomeres 1 homolog (S. pombe) (POT1), mRNA	POT1	NM_001042594.1	25913	POT1	POT1 protection of telomeres 1 homolog (S. pombe)	0	-2.72	-3.06	-3.71	-2.42	-2.98	-10.79	-10.79	-10.79	-10.79	0
gi|212549656|ref|NM_001137636.1|	212549656	NM_001137636.1	Sus scrofa v-crk sarcoma virus CT10 oncogene homolog (avian) (CRK), mRNA	CRK	BC001718.1	1398	CRK	v-crk sarcoma virus CT10 oncogene homolog (avian)	0	-2.43	-2.92	-2.77	-4.08	-1.84	-3.81	-4.12	-11.23	-11.23	0
gi|212549660|ref|NM_001137637.1|	212549660	NM_001137637.1	Sus scrofa DBF4 homolog (S. cerevisiae) (DBF4), mRNA	DBF4	AK292569.1	10926	DBF4	DBF4 homolog (S. cerevisiae)	0	-0.2	-0.83	-1.12	-1.49	-2.71	-2.61	-4.76	-3.85	-2.71	0
gi|34582610|gb|AY368623.1|	34582610	AY368623.1	Sus scrofa collagen type V alpha 2 (COL5A2) mRNA, partial sequence		NM_000393.3	1290	COL5A2	collagen, type V, alpha 2	0	-1.2	-0.82	-1.7	-2.16	-3.99	-4.98	-5.23	-7.66	-8.56	0
gi|34854052|gb|AY368624.1|	34854052	AY368624.1	Sus scrofa clone TBI 3-7-3 mRNA sequence		AC025778.8	4363	ABCC1	ATP-binding cassette, sub-family C (CFTR/MRP), member 1	0	0.4	-0.29	-0.4	0.24	-1.17	-2.27	-2.64	-2.85	-2.22	0
gi|37050908|emb|AJ583708.1|	37050908	AJ583708.1	Sus scrofa partial mRNA for janus kinase 2 (JNK2 gene)	MAPK9	NM_139068.2	5601	MAPK9	mitogen-activated protein kinase 9	0	-3.98	-2.25	-1.91	-2.32	-3.47	-0.2	-9.47	-9.47	-9.47	0
gi|45269004|gb|AY550057.1|	45269004	AY550057.1	Sus scrofa ornithine decarboxylase mRNA, partial cds	ODC	BC025296.1	4953	ODC1	ornithine decarboxylase 1	0	-3.24	-3.73	-9.73	-9.73	-2.14	-9.73	-9.73	-9.73	-9.73	0
gi|45758483|gb|AY553927.1|	45758483	AY553927.1	Sus scrofa preimplantation protein 2 mRNA, partial cds	PREI2	AK298158.1	4927	NUP88	nucleoporin 88kDa	0	0.98	1.16	1.15	1.2	0.29	-1.27	-1.83	-0.61	-1.22	0
gi|46095042|gb|AY574215.1|	46095042	AY574215.1	Sus scrofa Impact (Impact) mRNA, partial cds	Impact	NM_018439.3	55364	IMPACT	Impact homolog (mouse)	0	-1.17	-1.07	-1.44	-1.68	-1.46	-2.27	-3.25	-3.63	-3.71	0
gi|47522617|ref|NM_213934.1|	47522617	NM_213934.1	Sus scrofa vinculin (VCL), mRNA	VCL	NM_003373.3	7414	VCL	vinculin	0	-1.78	-0.9	-1.18	-1.63	-1.36	-1.48	-1.97	-6.81	-5.88	0
gi|47522639|ref|NM_213925.1|	47522639	NM_213925.1	Sus scrofa CD97 molecule (CD97), mRNA	CD97	AK304553.1	976	CD97	CD97 molecule	0	-1.11	-0.91	-1.06	-0.98	-1.18	-1.69	-3.9	-2.98	-2.94	0
gi|47522645|ref|NM_213919.1|	47522645	NM_213919.1	Sus scrofa aurora kinase B (AURKB), mRNA	AURKB	AK314889.1	9212	AURKB	aurora kinase B	0	-1.02	-0.87	-1.27	-1.35	-3.67	-4.56	-10.67	-4.81	-10.67	0
gi|47522647|ref|NM_213921.1|	47522647	NM_213921.1	Sus scrofa hexosaminidase B (beta polypeptide) (HEXB), mRNA	HEXB	NM_000521.3	3074	HEXB	hexosaminidase B (beta polypeptide)	0	-1.39	-0.97	-1.67	-1.59	-2.68	-2.67	-11.68	-11.68	-11.68	0
gi|47522661|ref|NM_213911.1|	47522661	NM_213911.1	Sus scrofa progesterone receptor membrane component 1 (PGRMC1), mRNA	PGRMC1	NM_006667.3	10857	PGRMC1	progesterone receptor membrane component 1	0	-0.84	-0.77	-0.85	-0.82	-2.12	-3.72	-4.19	-9.51	-8.99	0
gi|47522679|ref|NM_213904.1|	47522679	NM_213904.1	Sus scrofa glucosidase II (G2AN), mRNA	GANAB	NM_198334.1	23193	GANAB	glucosidase, alpha; neutral AB	0	-1.5	-1.06	-1.19	-1.51	-1.35	-2.16	-3.26	-3.68	-5.23	0
gi|47522703|ref|NM_213891.1|	47522703	NM_213891.1	Sus scrofa vascular cell adhesion molecule (VCAM1), mRNA	VCAM1	AK291732.1	7412	VCAM1	vascular cell adhesion molecule 1	0	-0.42	-0.33	-0.79	-0.49	-2.43	-2.71	-2.13	-4.33	-4.06	0
gi|47522717|ref|NM_213944.1|	47522717	NM_213944.1	Sus scrofa defender against cell death 1 (DAD1), mRNA	DAD1	D15057.1	1603	DAD1	defender against cell death 1	0	0.03	0.14	-0.26	-0.1	-0.59	-1.54	-1.28	-6.35	-6.42	0
gi|47522727|ref|NM_213949.1|	47522727	NM_213949.1	Sus scrofa solute carrier family 12 (potassium/chloride transporters), member 4 (SLC12A4), mRNA	SLC12A4	NM_005072.4	6560	SLC12A4	solute carrier family 12 (potassium/chloride transporters), member 4	0	-1.01	-0.57	-0.75	-0.74	-1.98	-3.27	-3.67	-4.05	-4	0
gi|47522739|ref|NM_213955.1|	47522739	NM_213955.1	Sus scrofa galactosamine (N-acetyl)-6-sulfate sulfatase (GALNS), mRNA	GALNS	NM_000512.4	2588	GALNS	galactosamine (N-acetyl)-6-sulfate sulfatase	0	0	-0.39	-1.92	-1.11	-2.38	-3.74	-3.73	-4.99	-5.07	0
gi|47522757|ref|NM_213965.1|	47522757	NM_213965.1	Sus scrofa SMAD family member 1 (SMAD1), mRNA	SMAD1	BC001878.1	4086	SMAD1	SMAD family member 1	0	0.29	-0.03	0.16	0.49	-2.8	-2.54	-1.69	-4.37	-2.85	0
gi|47522761|ref|NM_213967.1|	47522761	NM_213967.1	Sus scrofa scavenger receptor class B, member 1 (SCARB1), mRNA	SCARB1	NM_005505.4	949	SCARB1	scavenger receptor class B, member 1	0	0.21	0.13	0.22	0.39	-0.64	-1.03	-1.06	-1.34	-3.64	0
gi|47522763|ref|NM_213968.1|	47522763	NM_213968.1	Sus scrofa integrin, beta 1 (fibronectin receptor, beta polypeptide, antigen CD29 includes MDF2, MSK12) (ITGB1), mRNA	ITGB1	BC020057.1	3688	ITGB1	integrin, beta 1 (fibronectin receptor, beta polypeptide, antigen CD29 includes MDF2, MSK12)	0	-1.31	-1.81	-2.11	-2.11	-2.3	-2.86	-3.21	-5.5	-4.97	0
gi|47522789|ref|NM_213982.1|	47522789	NM_213982.1	Sus scrofa CD47 molecule (CD47), mRNA	CD47	BC037306.1	961	CD47	CD47 molecule	0	0.24	-0.52	-0.53	-0.72	-0.96	-0.19	-1.3	-2.32	-2.66	0
gi|47522819|ref|NM_213997.1|	47522819	NM_213997.1	Sus scrofa interleukin 18 (interferon-gamma-inducing factor) (IL18), mRNA	IL18	NM_001562.2	3606	IL18	interleukin 18 (interferon-gamma-inducing factor)	0	-0.74	0.03	-0.32	-0.79	-4.75	-4.64	-4.21	-10.75	-10.75	0
gi|47522831|ref|NM_214003.1|	47522831	NM_214003.1	Sus scrofa insulin-like growth factor binding protein 2 (IGFBP2), mRNA	IGFBP2	BC004312.1	3485	IGFBP2	insulin-like growth factor binding protein 2, 36kDa	0	-0.4	-1.79	-2.94	-2.22	-5.61	-5.96	-7.75	-8	-6.08	0
gi|47522845|ref|NM_214010.1|	47522845	NM_214010.1	Sus scrofa ATP-binding cassette, sub-family G (WHITE), member 2 (ABCG2), mRNA	ABCG2	AK290000.1	9429	ABCG2	ATP-binding cassette, sub-family G (WHITE), member 2	0	-1.33	-0.46	-0.54	0.01	-1.36	-2.11	-2.83	-3.6	-3.79	0
gi|47522869|ref|NM_214024.1|	47522869	NM_214024.1	Sus scrofa protein phosphatase 2 (formerly 2A), regulatory subunit A, alpha isoform (PPP2R1A), mRNA	PPP2R1A	NM_014225.4	5518	PPP2R1A	protein phosphatase 2 (formerly 2A), regulatory subunit A, alpha isoform	0	-1.02	-0.59	-0.77	-1.29	-0.91	-1.81	-1.86	-5.58	-4.24	0
gi|47522881|ref|NM_214031.1|	47522881	NM_214031.1	Sus scrofa endoglin (ENG), mRNA	ENG	NM_001114753.1	2022	ENG	endoglin	0	-0.92	-1.7	-2.14	-1.19	-0.03	-0.94	-3.42	-11.54	-11.54	0
gi|47522921|ref|NM_214053.1|	47522921	NM_214053.1	Sus scrofa hyaluronan synthase 2 (SHAS2), mRNA	SHAS2	NM_005328.2	3037	HAS2	hyaluronan synthase 2	0	-1	-1.48	-2.05	-3.46	-11.62	-11.62	-11.62	-11.62	-11.62	0
gi|47522941|ref|NM_214063.1|	47522941	NM_214063.1	Sus scrofa non-histone protein HMG2 (HMGB2), mRNA	HMGB2	DQ895487.2	3148	HMGB2	high-mobility group box 2	0	0.29	0.48	0.15	0.04	-2.59	-3.88	-4.13	-4.54	-5.61	0
gi|47522983|ref|NM_214086.1|	47522983	NM_214086.1	Sus scrofa CD34 molecule (CD34), mRNA	CD34	AK294381.1	947	CD34	CD34 molecule	0	-0.46	0.2	0.38	0.32	-1.18	-1.58	-2.25	-2.26	-2.89	0
gi|47522985|ref|NM_214088.1|	47522985	NM_214088.1	Sus scrofa cyclin D2 (CCND2), mRNA	CCND2	NM_001759.3	894	CCND2	cyclin D2	0	-2.4	-0.52	-0.22	-0.23	-1.42	-3.78	-9.88	-9.88	-9.88	0
gi|47522999|ref|NM_214095.1|	47522999	NM_214095.1	Sus scrofa calcitonin receptor-like (CALCRL), mRNA	CALCRL	AK292998.1	10203	CALCRL	calcitonin receptor-like	0	-3.4	-2.06	-1.91	-3.32	-2.47	-3.36	-9.47	-9.47	-9.47	0
gi|47523015|ref|NM_214103.1|	47523015	NM_214103.1	Sus scrofa heat shock protein 90kDa beta (Grp94), member 1 (HSP90B1), mRNA	HSP90B1	NM_003299.1	7184	HSP90B1	heat shock protein 90kDa beta (Grp94), member 1	0	-0.12	-1.68	-1.84	-0.98	-1.49	-2.9	-4.35	-4.54	-2.76	0
gi|47523033|ref|NM_214113.1|	47523033	NM_214113.1	Sus scrofa Janus kinase 2 (JAK2), mRNA	JAK2	AF005216.1	3717	JAK2	Janus kinase 2	0	-0.7	0.05	0.1	-0.21	-1.36	-2.46	-2.18	-3.69	-3.51	0
gi|47523037|ref|NM_214115.1|	47523037	NM_214115.1	Sus scrofa ubiquitous PKC-potentiated PP1 inhibitor (PHI-1), mRNA	PHI-1	XM_002344574.1	100293737	LOC100293737	similar to protein phosphatase 1 regulatory subunit 14B	0	-0.46	-0.03	-0.47	-1.02	-1.13	-2.63	-3.01	-3.19	-3.09	0
gi|47523085|ref|NM_214144.1|	47523085	NM_214144.1	Sus scrofa peroxiredoxin 5 (PRDX5), nuclear gene encoding mitochondrial protein, mRNA	PRDX5	AF231705.1	25824	PRDX5	peroxiredoxin 5	0	0.89	0.53	0.11	-0.06	-1.44	-0.66	-0.68	-2.47	-2.2	0
gi|47523087|ref|NM_214145.1|	47523087	NM_214145.1	Sus scrofa tumor suppressor p53 (P53), mRNA	P53	AK297927.1	7157	TP53	tumor protein p53	0	-2.59	-1.31	-1.54	-3.31	-2.29	-9.88	-9.88	-9.88	-9.88	0
gi|47523093|ref|NM_213884.1|	47523093	NM_213884.1	Sus scrofa topoisomersae II (TOPOII), mRNA	TOPOII	BC140791.1	7153	TOP2A	topoisomerase (DNA) II alpha 170kDa	0	-3.16	-2.93	-3.83	-3.61	-7.08	-8.57	-6.82	-14.67	-14.67	0
gi|47523095|ref|NM_213881.1|	47523095	NM_213881.1	Sus scrofa CRY protein (CRY), mRNA	CRY	BC119660.1	51084	CRYL1	crystallin, lambda 1	0	0.13	0.22	-0.01	-0.03	-1.66	-1.6	-2.27	-1.83	-2.35	0
gi|47523169|ref|NM_213843.1|	47523169	NM_213843.1	Sus scrofa SRY (sex determining region Y)-box 9 (SOX9), mRNA	SOX9	NM_000346.3	6662	SOX9	SRY (sex determining region Y)-box 9	0	-1.51	-1.43	-2.52	-2.06	-10.08	-10.08	-10.08	-10.08	-10.08	0
gi|47523193|ref|NM_213829.1|	47523193	NM_213829.1	Sus scrofa sperm associated AWN protein (AWN), mRNA	AWN	NM_001080825.2	144404	TMEM120B	transmembrane protein 120B	0	0.56	2.23	1.88	0.29	-7.73	-7.73	-7.73	-7.73	-7.73	0
gi|47523223|ref|NM_213808.1|	47523223	NM_213808.1	Sus scrofa angiopoietin 2 (ANGPT2), mRNA	ANGPT2	BC126200.1	285	ANGPT2	angiopoietin 2	0	1.04	0.18	0.32	0.69	-3.08	-1.98	-9.08	-9.08	-2.71	0
gi|47523317|ref|NM_213763.1|	47523317	AY459532	Sus scrofa ubiquitin carboxyl-terminal esterase L1 (ubiquitin thiolesterase) (UCHL1), mRNA	UCHL1	NM_004181.4	7345	UCHL1	ubiquitin carboxyl-terminal esterase L1 (ubiquitin thiolesterase)	0	-4.59	-4.94	-5.45	-6.34	-4.81	-5.48	-5.28	-14.91	-8.53	0
gi|47523337|ref|NM_213753.1|	47523337	NM_213753.1	Sus scrofa translocator protein (18kDa) (TSPO), mRNA	TSPO	BC001110.2	706	TSPO	translocator protein (18kDa)	0	-0.57	0.31	-0.31	-1.3	-2.65	-2.35	-2.5	-2.03	-2.98	0
gi|47523353|ref|NM_213741.1|	47523353	NM_213741.1	Sus scrofa Trophinin (TROP), mRNA	TROP	NG_012806.1	7216	TRO	trophinin	0	-0.99	-1.51	-2.63	-4.41	-10.56	-10.56	-10.56	-10.56	-10.56	0
gi|47523387|ref|NM_214148.1|	47523387	NM_214148.1	Sus scrofa epithelial chloride channel protein (AECC), mRNA	AECC	AK300858.1	1179	CLCA1	chloride channel accessory 1	0	1.83	0.75	0.2	-0.41	-8.56	-8.56	-8.56	-8.56	-8.56	0
gi|47523415|ref|NM_214164.1|	47523415	NM_214164.1	Sus scrofa similar to tigger transposable element derived 4 (TIGD4), mRNA	TIGD4	BC037869.2	201798	TIGD4	tigger transposable element derived 4	0	-1.33	-1.15	-2.05	-1.92	-2.81	-9.81	-3.27	-9.81	-9.81	0
gi|47523451|ref|NM_214182.1|	47523451	NM_214182.1	Sus scrofa low-affinity Na-dependent glucose cotransporter (PSGLT2), mRNA	SLC5A4	NM_014227.2	6527	SLC5A4	solute carrier family 5 (low affinity glucose cotransporter), member 4	0	-0.48	-0.52	-0.76	-0.95	-2.54	-3.56	-3.72	-2.8	-2	0
gi|47523461|ref|NM_214192.1|	47523461	NM_214192.1	Sus scrofa gelatinase A (MMP-2), mRNA	MMP-2	NM_004530.4	4313	MMP2	matrix metallopeptidase 2 (gelatinase A, 72kDa gelatinase, 72kDa type IV collagenase)	0	-0.12	0.45	-0.28	-0.56	-3.4	-4.06	-4.4	-2.89	-3.52	0
gi|47523463|ref|NM_214188.1|	47523463	NM_214188.1	Sus scrofa oligosaccharyltransferase OST48 (OST48), mRNA	OST48	NM_005216.4	1650	DDOST	dolichyl-diphosphooligosaccharide-protein glycosyltransferase	0	1.32	1.55	1.18	0.39	-0.6	-1.87	-1.04	-3.24	-1.74	0
gi|47523473|ref|NM_214198.1|	47523473	NM_214198.1	Sus scrofa transforming growth factor, beta 3 (TGFB3), mRNA	TGFB3	NM_003239.2	7043	TGFB3	transforming growth factor, beta 3	0	5.39	2.76	0.79	3.77	1.03	-5.55	-5.55	0.3	-5.55	0
gi|47523495|ref|NM_214206.1|	47523495	NM_214206.1	Sus scrofa Niemann-Pick disease, type C2 (NPC2), mRNA	NPC2	AK300879.1	10577	NPC2	Niemann-Pick disease, type C2	0	-1.39	-0.79	-1.29	-0.94	-2.42	-1.32	-2.15	-3.33	-4.21	0
gi|47523537|ref|NM_214231.1|	47523537	NM_214231.1	Sus scrofa polypyrimidine tract binding protein 1 (PTBP1), mRNA	PTBP1	NM_002819.4	5725	PTBP1	polypyrimidine tract binding protein 1	0	-3.88	-1.96	-3.61	-3.81	-3.37	-9.37	-9.37	-9.37	-9.37	0
gi|47523543|ref|NM_214230.1|	47523543	NM_214230.1	Sus scrofa tenascin C (TNC), mRNA	TNC	NM_002160.2	3371	TNC	tenascin C	0	-2.21	-2.7	-3.5	-4.58	-6.73	-7.22	-14.91	-8.46	-14.91	0
gi|47523559|ref|NM_214239.1|	47523559	NM_214239.1	Sus scrofa matrix metallopeptidase 14 (membrane-inserted) (MMP14), mRNA	MMP14	NM_004995.2	4323	MMP14	matrix metallopeptidase 14 (membrane-inserted)	0	0.8	1.03	0.5	0.54	-1.67	-3.4	-4.78	-5.46	-5.54	0
gi|47523567|ref|NM_214244.1|	47523567	NM_214244.1	Sus scrofa carboxypeptidase A1 precursor (PCPA1), mRNA	PCPA1	NM_001868.2	1357	CPA1	carboxypeptidase A1 (pancreatic)	0	-0.42	1.01	1.49	0.57	-4.26	-10.26	-3.72	-10.26	-10.26	0
gi|47523569|ref|NM_214249.1|	47523569	NM_214249.1	Sus scrofa ATPase, Na+/K+ transporting, alpha 1 polypeptide (ATP1A1), mRNA	ATP1A1	BC003077.2	476	ATP1A1	ATPase, Na+/K+ transporting, alpha 1 polypeptide	0	-0.55	-0.7	-1.75	-1.91	-2.41	-2.34	-2.27	-2.09	-2.28	0
gi|47523579|ref|NM_214250.1|	47523579	NM_214250.1	Sus scrofa platelet-activating factor acetylhydrolase, isoform Ib, alpha subunit 45kDa (PAFAH1B1), mRNA	PAFAH1B1	NM_000430.3	5048	PAFAH1B1	platelet-activating factor acetylhydrolase 1b, regulatory subunit 1 (45kDa)	0	-0.86	-0.63	-0.73	-1.25	-1.12	-1.35	-1.2	-2.57	-2.6	0
gi|47523581|ref|NM_214257.1|	47523581	NM_214257.1	Sus scrofa dipeptidyl-peptidase 4 (DPP4), mRNA	DPP4	NM_001935.3	1803	DPP4	dipeptidyl-peptidase 4	0	0.54	1.11	0.54	1.01	-2.47	0.09	-8.47	-8.47	-8.47	0
gi|47523607|ref|NM_214267.1|	47523607	NM_214267.1	Sus scrofa NADPH oxidase light chain subunit (GP22-PHOX), mRNA	GP22-PHOX	BC006465.1	1535	CYBA	cytochrome b-245, alpha polypeptide	0	-1.57	-1.07	-1.41	-1.49	-4.08	-4.21	-3.77	-11.89	-11.89	0
gi|47523641|ref|NM_214289.1|	47523641	NM_214289.1	Sus scrofa uncoupling protein 2 (UCP2), nuclear gene encoding mitochondrial protein, mRNA	UCP2	CR626508.1	7351	UCP2	uncoupling protein 2 (mitochondrial, proton carrier)	0	1.94	2.33	2.03	2	-0.77	-1.08	-3.23	-1.1	-1.52	0
gi|47523673|ref|NM_214308.1|	47523673	NM_214308.1	Sus scrofa apolipoprotein E (APOE), mRNA	APOE	AK314898.1	348	APOE	apolipoprotein E	0	0.08	0.79	-0.21	-0.34	-1.57	-2.09	-2.74	-1.01	-1.56	0
gi|47523675|ref|NM_214305.1|	47523675	NM_214305.1	Sus scrofa six transmembrane epithelial antigen of the prostate 1 (STEAP1), mRNA	STEAP1	NM_012449.2	26872	STEAP1	six transmembrane epithelial antigen of the prostate 1	0	-2.89	-2.54	-2.61	-2.07	-9.95	-9.95	-9.95	-9.95	-9.95	0
gi|47523683|ref|NM_214309.1|	47523683	NM_214309.1	Sus scrofa nudix (nucleoside diphosphate linked moiety X)-type motif 2 (NUDT2), mRNA	NUDT2	NM_001161.3	318	NUDT2	nudix (nucleoside diphosphate linked moiety X)-type motif 2	0	1.86	0.96	0.68	0.18	-0.24	-1.64	-1.71	-0.92	-1.46	0
gi|47523711|ref|NM_214323.1|	47523711	NM_214323.1	Sus scrofa junction plakoglobin (JUP), mRNA	JUP	BC000441.2	3728	JUP	junction plakoglobin	0	-0.62	-0.65	-0.95	-1.3	-1.81	-2.33	-4.4	-3.19	-4.41	0
gi|47523713|ref|NM_214325.1|	47523713	NM_214325.1	Sus scrofa ras homolog gene family, member T2 (RHOT2), nuclear gene encoding mitochondrial protein, mRNA	RHOT2	CR611878.1	89941	RHOT2	ras homolog gene family, member T2	0	0	0.45	0.56	-0.17	-3.69	-9.69	-2.57	-9.69	-9.69	0
gi|47523715|ref|NM_214327.1|	47523715	NM_214327.1	Sus scrofa UDP-GlcNAc:betaGal beta-1,3-N-acetylglucosaminyltransferase 5 (B3GNT5), mRNA	B3GNT5	NM_032047.4	84002	B3GNT5	UDP-GlcNAc:betaGal beta-1,3-N-acetylglucosaminyltransferase 5	0	-2.36	-2.61	-3.13	-2.88	-5.39	-11.97	-11.97	-11.97	-11.97	0
gi|47523725|ref|NM_214333.1|	47523725	NM_214333.1	Sus scrofa ribophorin I (RPN1), mRNA	RPN1	BC010839.1	6184	RPN1	ribophorin I	0	-0.14	-0.55	-0.22	-0.61	-0.78	-1.06	-1.84	-2.91	-2.9	0
gi|47523759|ref|NM_214351.1|	47523759	NM_214351.1	Sus scrofa beta-1,3-N-acetylgalactosaminyltransferase 1 (globoside blood group) (B3GALNT1), mRNA	B3GALNT1	NM_033168.2	8706	B3GALNT1	beta-1,3-N-acetylgalactosaminyltransferase 1 (globoside blood group)	0	0.55	-0.53	-0.86	-1.26	-2.83	-1.14	-10.15	-10.15	-10.15	0
gi|47523799|ref|NM_214372.1|	47523799	NM_214372.1	Sus scrofa amyloid beta (A4) precursor protein (APP), mRNA	APP	NM_000484.3	351	APP	amyloid beta (A4) precursor protein	0	-1.73	-1.67	-1.63	-1.62	-3.14	-3.25	-4.02	-5.48	-5.96	0
gi|47523819|ref|NM_214382.1|	47523819	NM_214382.1	Sus scrofa parathyroid hormone 1 receptor (PTH1R), mRNA	PTH1R	BC112221.1	5745	PTH1R	parathyroid hormone 1 receptor	0	-0.34	-0.43	-0.29	-0.13	-2.68	-2.67	-4.11	-6.96	-6.02	0
gi|47523887|ref|NM_214418.1|	47523887	NM_214418.1	Sus scrofa solute carrier family 25 (mitochondrial carrier; adenine nucleotide translocator), member 6 (SLC25A6), nuclear gene encoding mitochondrial protein, mRNA	SLC25A6	NM_001636.3	293	SLC25A6	solute carrier family 25 (mitochondrial carrier; adenine nucleotide translocator), member 6	0	0.67	0.78	0.36	0.29	-0.48	-0.68	-2.89	-2.86	-2.11	0
gi|47523931|ref|NM_214440.1|	47523931	NM_214440.1	Sus scrofa hyaluronoglucosaminidase 2 (HYAL2), mRNA	HYAL2	BC000692.2	8692	HYAL2	hyaluronoglucosaminidase 2	0	-1.84	-2.41	-2.73	-2.61	-2.32	-1.66	-11.57	-11.57	-11.57	0
gi|48675922|ref|NM_001001630.1|	48675922	NM_001001630.1	Sus scrofa 2700099C19-like protein (LOC414386), mRNA	LOC414386	NM_016484.4	51248	PDZD11	PDZ domain containing 11	0	0.69	0.04	-0.28	-0.58	-1.32	-2.42	-2.73	-2.98	-2.89	0
gi|48675928|ref|NM_001001629.1|	48675928	NM_001001629.1	Sus scrofa D230037D09Rik-like protein (LOC414384), mRNA	LOC414384	NM_001098621.1	26175	C14orf109	chromosome 14 open reading frame 109	0	-0.26	-0.18	-0.66	-1.04	-2.99	-2.89	-3.27	-2.03	-1.87	0
gi|48976064|ref|NM_001001649.2|	48976064	NM_001001649.2	Sus scrofa cadherin 5 (CDH5), mRNA	CDH5	AK300461.1	1003	CDH5	cadherin 5, type 2 (vascular endothelium)	0	0.6	0.53	1.07	1.43	-1.35	-0.71	-1.12	-1.19	-1.58	0
gi|48976128|ref|NM_001001770.1|	48976128	NM_001001770.1	Sus scrofa cytochrome b-5 (CYB5), mRNA	CYB5A	DQ894343.2	1528	CYB5A	cytochrome b5 type A (microsomal)	0	0.13	-0.22	-0.42	0.2	-0.86	-1.04	-0.92	-1.87	-2.21	0
gi|49274614|ref|NM_001001860.1|	49274614	NM_001001860.1	Sus scrofa melanoma antigen family D, 1 (MAGED1), mRNA	MAGED1	AF300328.1	9500	MAGED1	melanoma antigen family D, 1	0	0.19	0.15	-0.11	-0.29	-2.76	-4.49	-4.84	-4.54	-4.62	0
gi|50347100|gb|AY662692.1|	50347100	AY662692.1	Sus scrofa 6A3-5 protein mRNA, complete cds	LOC100152904	NM_175863.2	57492	ARID1B	AT rich interactive domain 1B (SWI1-like)	0	-0.87	-0.67	-0.56	-0.71	-1.85	-2.08	-1.9	-1.88	-1.8	0
gi|510346|emb|Z34931.1|	510346	Z34931.1	S.scrofa mRNA for protein phosphatase 2A 65 kDa regulatory subunit, beta isoform (partial)	PPP2R1B	NM_002716.4	5519	PPP2R1B	protein phosphatase 2 (formerly 2A), regulatory subunit A, beta isoform	0	-1.16	-1.26	-1.25	-1.3	-2.01	-2.91	-3.48	-5.15	-11.6	0
gi|51036692|ref|NM_001003662.1|	51036692	NM_001003662.1	Sus scrofa follistatin (FST), mRNA	FST	BC004107.2	10468	FST	follistatin	0	-0.34	-0.26	-0.12	0.19	-0.64	-1.31	-2.39	-4.29	-4.36	0
gi|51592104|ref|NM_001004027.1|	51592104	NM_001004027.1	Sus scrofa heme oxygenase (decycling) 1 (HMOX1), mRNA	HMOX1	CR626132.1	3162	HMOX1	heme oxygenase (decycling) 1	0	-2.79	-2.28	-2.16	-1.43	-3.08	-3.98	-2.38	-11.09	-11.09	0
gi|51592110|ref|NM_001004031.1|	51592110	NM_001004031.1	Sus scrofa destrin (DSTN), mRNA	DSTN	NM_006870.3	11034	DSTN	destrin (actin depolymerizing factor)	0	0.91	1.26	0.8	-0.18	-0.38	-3.45	-1.77	-2.3	-3.47	0
gi|51592138|ref|NM_001004045.1|	51592138	NM_001004045.1	Sus scrofa S100C protein (S100A11), mRNA	S100A11	DQ894925.2	6282	S100A11	S100 calcium binding protein A11	0	-2.3	-2.2	-3	-3.11	-3.82	-5.13	-4.79	-14.41	-14.41	0
gi|52350680|gb|AY609396.1|	52350680	AY609396.1	Sus scrofa clone Clu_102081.scr.msk.p1.Contig1, mRNA sequence		NM_174889.4	91942	NDUFAF2	NADH dehydrogenase (ubiquinone) 1 alpha subcomplex, assembly factor 2	0	0.21	0.09	0.12	-0.13	-1.02	-1.54	-0.16	-1.48	-2.75	0
gi|52350683|gb|AY609399.1|	52350683	AY609399.1	Sus scrofa clone Clu_10274.scr.msk.p1.Contig2, mRNA sequence		NM_181836.5	51014	TMED7	transmembrane emp24 protein transport domain containing 7	0	-1.3	-1.8	-2.2	-1.55	-1.94	-3.44	-3.23	-4.31	-3.53	0
gi|52350690|gb|AY609406.1|	52350690	AY609406.1	Sus scrofa clone Clu_1053.scr.msk.p1.Contig1, mRNA sequence		NM_001801.2	1036	CDO1	cysteine dioxygenase, type I	0	0.37	0.68	0.72	-0.34	-4.48	-5.37	-11.48	-5.62	-11.48	0
gi|52350710|gb|AY609425.1|	52350710	AY609425.1	Sus scrofa clone Clu_11118.scr.msk.p1.Contig3, mRNA sequence		NM_145266.4	134492	NUDCD2	NudC domain containing 2	0	0.47	-0.24	0.28	0.03	-0.03	0.08	-0.38	-0.51	-1.1	0
gi|52350717|gb|AY609432.1|	52350717	AY609432.1	Sus scrofa clone Clu_114.scr.msk.p1.Contig6, mRNA sequence		NM_177433.1	10916	MAGED2	melanoma antigen family D, 2	0	0.2	-0.57	-1.15	-1.63	-1.78	-2.68	-1.51	-9.37	-9.37	0
gi|52350719|gb|AY609434.1|	52350719	AY609434.1	Sus scrofa clone Clu_11415.scr.msk.p1.Contig1, mRNA sequence		NM_138779.3	93081	C13orf27	chromosome 13 open reading frame 27	0	0.71	0.17	-0.52	-0.97	-1.96	-1.18	-2.01	-2.19	-3.76	0
gi|52350727|gb|AY609442.1|	52350727	AY609442.1	Sus scrofa clone Clu_116361.scr.msk.p1.Contig1, mRNA sequence		BC032142.2	84057	MND1	meiotic nuclear divisions 1 homolog (S. cerevisiae)	0	-0.11	-0.42	-0.84	-0.83	-9.92	-9.92	-2.06	-9.92	-9.92	0
gi|52351065|gb|AY609470.1|	52351065	AY609470.1	Sus scrofa clone Clu_12724.scr.msk.p1.Contig2, mRNA sequence		NM_016617.2	51569	UFM1	ubiquitin-fold modifier 1	0	0.51	-0.1	-0.14	0.56	0	-1.71	-1.03	-1.73	-1.41	0
gi|52351067|gb|AY609472.1|	52351067	AY609472.1	Sus scrofa clone Clu_12752.scr.msk.p1.Contig2, mRNA sequence		NM_020143.2	56902	PNO1	partner of NOB1 homolog (S. cerevisiae)	0	0.08	-0.38	-0.74	-0.71	0.09	-0.89	-0.83	-2.41	-1.49	0
gi|52351085|gb|AY609490.1|	52351085	AY609490.1	Sus scrofa clone Clu_1336.scr.msk.p1.Contig5, mRNA sequence		NM_005602.5	5010	CLDN11	claudin 11	0	-3.44	-4.16	-2.72	-3.49	-11.38	-5.27	-11.38	-5.52	-11.38	0
gi|52351090|gb|AY609495.1|	52351090	AY609495.1	Sus scrofa clone Clu_1350.scr.msk.p1.Contig2, mRNA sequence		BC000420.2	10983	CCNI	cyclin I	0	-0.55	-0.71	-0.67	-0.75	-1.95	-0.27	-1.57	-2.28	-1.23	0
gi|52351109|gb|AY609514.1|	52351109	AY609514.1	Sus scrofa clone Clu_14638.scr.msk.p1.Contig1, mRNA sequence		AK300058.1	55255	WDR41	WD repeat domain 41	0	-1.37	-1.46	-1.91	-2.03	-2.2	-1.85	-2.56	-2.77	-2.77	0
gi|52351111|gb|AY609516.1|	52351111	AY609516.1	Sus scrofa clone Clu_146952.scr.msk.p1.Contig2, mRNA sequence		NM_007015.2	11061	LECT1	leukocyte cell derived chemotaxin 1	0	-6.94	-6.69	-8.67	-6.53	-7.42	-8.31	-14.42	-14.42	-14.42	0
gi|52351116|gb|AY609521.1|	52351116	AY609521.1	Sus scrofa clone Clu_15365.scr.msk.p1.Contig2, mRNA sequence		BC012123.1	64083	GOLPH3	golgi phosphoprotein 3 (coat-protein)	0	-1.24	-1.12	-1.44	-1.25	-1.63	-1.75	-2.27	-3.35	-3.49	0
gi|52351120|gb|AY609525.1|	52351120	AY609525.1	Sus scrofa clone Clu_1561.scr.msk.p1.Contig1, mRNA sequence		NM_007276.3	11335	CBX3	chromobox homolog 3 (HP1 gamma homolog, Drosophila)	0	0.06	-0.12	-0.79	-0.3	-1.39	-2.48	-2.93	-4.57	-5.97	0
gi|52351123|gb|AY609528.1|	52351123	AY609528.1	Sus scrofa clone Clu_15819.scr.msk.p1.Contig2, mRNA sequence		BC000229.1	79003	MIS12	MIS12, MIND kinetochore complex component, homolog (S. pombe)	0	-0.22	-0.17	-0.03	-0.06	-0.69	-1.25	-2.82	-3.07	-3.15	0
gi|52351125|gb|AY609530.1|	52351125	AY609530.1	Sus scrofa clone Clu_1600.scr.msk.p1.Contig1, mRNA sequence		AK222945.1	10609	SC65	synaptonemal complex protein SC65	0	-0.61	-1.02	-1.33	-1.98	-2.81	-2.99	-5.79	-6.2	-6.05	0
gi|52351127|gb|AY609532.1|	52351127	AY609532.1	Sus scrofa clone Clu_160555.scr.msk.p1.Contig1, mRNA sequence		NM_014885.3	10393	ANAPC10	anaphase promoting complex subunit 10	0	-1.61	-0.58	-0.34	-0.49	-1.25	-3.66	-3.8	-10.34	-10.34	0
gi|52351136|gb|AY609541.1|	52351136	AY609541.1	Sus scrofa clone Clu_166979.scr.msk.p1.Contig1, mRNA sequence		NM_006984.4	9071	CLDN10	claudin 10	0	-0.25	0.55	-0.1	-0.43	-9.32	-3.21	-9.32	-2.87	-9.32	0
gi|52351137|gb|AY609542.1|	52351137	AY609542.1	Sus scrofa clone Clu_1670.scr.msk.p1.Contig1, mRNA sequence		BC101834.1	9232	PTTG1	pituitary tumor-transforming 1	0	-3.19	-2.82	-3.72	-4.91	-11.48	-11.48	-4.36	-11.48	-11.48	0
gi|52351153|gb|AY609558.1|	52351153	AY609558.1	Sus scrofa clone Clu_17947.scr.msk.p1.Contig1, mRNA sequence	LOC100153765	AK055635.1	84935	C13orf33	chromosome 13 open reading frame 33	0	-0.46	0.03	-0.68	-0.23	-1.14	-1.75	-1.82	-2.04	-1.53	0
gi|52351156|gb|AY609561.1|	52351156	AY609561.1	Sus scrofa clone Clu_18150.scr.msk.p1.Contig1, mRNA sequence		BC005182.1	51118	UTP11L	UTP11-like, U3 small nucleolar ribonucleoprotein, (yeast)	0	-0.54	-0.35	-0.58	-0.98	0.15	-1.89	-1.71	-1.56	-2.1	0
gi|52351169|gb|AY609574.1|	52351169	AY609574.1	Sus scrofa clone Clu_19323.scr.msk.p1.Contig2, mRNA sequence		NM_021825.3	60492	CCDC90B	coiled-coil domain containing 90B	0	-0.58	-0.83	-1.07	-1.11	-1.12	-1.88	-1.69	-2.26	-3.02	0
gi|52351174|gb|AY609579.1|	52351174	AY609579.1	Sus scrofa clone Clu_196763.scr.msk.p1.Contig1, mRNA sequence		AK294599.1	145407	C14orf37	chromosome 14 open reading frame 37	0	-1.3	-1.49	-1.88	-2.6	-4.49	-11.81	-11.81	-11.81	-11.81	0
gi|52351176|gb|AY609581.1|	52351176	AY609581.1	Sus scrofa clone Clu_198385.scr.msk.p1.Contig2, mRNA sequence		NM_001008393.2	201725	C4orf46	chromosome 4 open reading frame 46	0	-0.62	0.06	0.52	0.47	-0.17	-2.88	-2.44	-10.56	-10.56	0
gi|52351191|gb|AY609596.1|	52351191	AY609596.1	Sus scrofa clone Clu_20384.scr.msk.p1.Contig4, mRNA sequence		NM_001142798.1	124944	C17orf49	chromosome 17 open reading frame 49	0	0.98	0.68	1.2	0.88	-1.04	-1.62	-0.98	-1.75	-2.88	0
gi|52351240|gb|AY609672.1|	52351240	AY609672.1	Sus scrofa clone Clu_24374.scr.msk.p1.Contig1, mRNA sequence		NM_024775.9	79833	GEMIN6	gem (nuclear organelle) associated protein 6	0	-2.54	-3.2	-2.04	-2.46	-1.79	-9.61	-3.07	-9.61	-9.61	0
gi|52351253|gb|AY609685.1|	52351253	AY609685.1	Sus scrofa clone Clu_25395.scr.msk.p1.Contig1, mRNA sequence		AK075091.1	152007	GLIPR2	GLI pathogenesis-related 2	0	0.15	-0.1	-0.9	-1.85	-4.03	-4.23	-5.18	-4	-4.44	0
gi|52351258|gb|AY609690.1|	52351258	AY609690.1	Sus scrofa clone Clu_258.scr.msk.p1.Contig1, mRNA sequence		BC072401.1	6120	RPE	ribulose-5-phosphate-3-epimerase	0	-0.16	-1.7	-1.61	-1.12	-3.69	-2.27	-9.69	-9.69	-9.69	0
gi|52351260|gb|AY609692.1|	52351260	AY609692.1	Sus scrofa clone Clu_26048.scr.msk.p1.Contig1, mRNA sequence		NM_024844.3	79902	NUP85	nucleoporin 85kDa	0	-1.16	-1.26	-1.49	-1.11	-2.39	-2.62	-3.19	-4.41	-3.3	0
gi|52351287|gb|AY609719.1|	52351287	AY609719.1	Sus scrofa clone Clu_27469.scr.msk.p1.Contig1, mRNA sequence		NM_024051.2	79017	GGCT	gamma-glutamyl cyclotransferase	0	-0.33	-0.54	-1.1	-0.52	-2.44	-4.22	-2.37	-3.23	-2.79	0
gi|52351303|gb|AY609735.1|	52351303	AY609735.1	Sus scrofa clone Clu_2829.scr.msk.p1.Contig1, mRNA sequence		DQ323735.1	79971	GPR177	G protein-coupled receptor 177	0	-1.57	-1.89	-1.72	-1.27	-2.68	-3.66	-4.73	-4.53	-6.06	0
gi|52351304|gb|AY609736.1|	52351304	AY609736.1	Sus scrofa clone Clu_28301.scr.msk.p1.Contig2, mRNA sequence		NM_014051.3	28978	TMEM14A	transmembrane protein 14A	0	-1.01	-0.97	-1.8	-1.87	-4.02	-4.33	-1.9	-2.35	-3.06	0
gi|52351305|gb|AY609737.1|	52351305	AY609737.1	Sus scrofa clone Clu_28343.scr.msk.p1.Contig1, mRNA sequence		BC008679.1	92342	C1orf156	chromosome 1 open reading frame 156	0	1.61	1.27	0.76	0.67	-0.11	0.29	-1.69	-2.95	-8.81	0
gi|52351306|gb|AY609738.1|	52351306	AY609738.1	Sus scrofa clone Clu_2858.scr.msk.p1.Contig1, mRNA sequence		NM_016938.3	30008	EFEMP2	EGF-containing fibulin-like extracellular matrix protein 2	0	-2.11	-1.11	-1.14	-1.47	-3.43	-3.79	-3.42	-3.86	-4.6	0
gi|52351323|gb|AY609755.1|	52351323	AY609755.1	Sus scrofa clone Clu_2979.scr.msk.p1.Contig1, mRNA sequence		NM_153333.2	90843	TCEAL8	transcription elongation factor A (SII)-like 8	0	-0.3	-0.6	-0.66	-0.71	-1.96	-2.61	-2.53	-4.97	-5.63	0
gi|52351354|gb|AY609784.1|	52351354	AY609784.1	Sus scrofa clone Clu_30933.scr.msk.p1.Contig9, mRNA sequence		NM_000849.4	2947	GSTM3	glutathione S-transferase mu 3 (brain)	0	-1.09	0.54	-0.54	-1.58	-3.81	-4.13	-11.82	-11.82	-11.82	0
gi|52351363|gb|AY609793.1|	52351363	AY609793.1	Sus scrofa clone Clu_3136.scr.msk.p1.Contig1, mRNA sequence		NM_014478.4	27297	CRCP	CGRP receptor component	0	-3.33	-2.88	-3.65	-3.42	-1.9	-4.88	-4.45	-10.99	-10.99	0
gi|52351364|gb|AY609794.1|	52351364	AY609794.1	Sus scrofa clone Clu_31401.scr.msk.p1.Contig1, mRNA sequence		NM_144578.3	93487	MAPK1IP1L	mitogen-activated protein kinase 1 interacting protein 1-like	0	-0.49	-0.3	-0.22	-0.04	-1.86	-3.45	-2.44	-2.89	-4.78	0
gi|52351378|gb|AY609808.1|	52351378	AY609808.1	Sus scrofa clone Clu_32103.scr.msk.p1.Contig2, mRNA sequence		BC015045.2	2592	GALT	galactose-1-phosphate uridylyltransferase	0	-0.61	-0.74	-1.59	-0.96	-0.19	-3.14	-2.93	-4.18	-2.95	0
gi|52351391|gb|AY609821.1|	52351391	AY609821.1	Sus scrofa clone Clu_3282.scr.msk.p1.Contig2, mRNA sequence		NM_014187.3	29100	TMEM208	transmembrane protein 208	0	0	0.28	-0.01	-0.27	0.41	-0.63	-1.73	-1.23	-2.89	0
gi|52351402|gb|AY609832.1|	52351402	AY609832.1	Sus scrofa clone Clu_33487.scr.msk.p1.Contig1, mRNA sequence		NM_001237.3	890	CCNA2	cyclin A2	0	-3.11	-2.74	-3.71	-4.16	-5.05	-11.05	-11.05	-11.05	-11.05	0
gi|52351410|gb|AY609840.1|	52351410	AY609840.1	Sus scrofa clone Clu_34393.scr.msk.p1.Contig1, mRNA sequence		NM_031908.4	114898	C1QTNF2	C1q and tumor necrosis factor related protein 2	0	-0.17	0.75	0.52	-0.33	-2.83	-10.15	-10.15	-4.29	-10.15	0
gi|52351419|gb|AY609849.1|	52351419	AY609849.1	Sus scrofa clone Clu_35267.scr.msk.p1.Contig1, mRNA sequence		NM_014501.2	27338	UBE2S	ubiquitin-conjugating enzyme E2S	0	-0.16	-0.84	-1.08	-1.3	-1.77	-1.51	-1.44	-1.31	-2.11	0
gi|52351429|gb|AY609859.1|	52351429	AY609859.1	Sus scrofa clone Clu_36198.scr.msk.p1.Contig1, mRNA sequence		NM_018090.4	55707	NECAP2	NECAP endocytosis associated 2	0	-0.49	-0.39	-0.69	-0.34	-1.32	-2.28	-3.44	-3.11	-2.1	0
gi|52351430|gb|AY609860.1|	52351430	AY609860.1	Sus scrofa clone Clu_3623.scr.msk.p1.Contig4, mRNA sequence		NM_003919.2	8910	SGCE	sarcoglycan, epsilon	0	-0.81	-0.57	-0.64	-0.99	-2.92	-3.92	-4.33	-4.22	-5.49	0
gi|52351435|gb|AY609865.1|	52351435	AY609865.1	Sus scrofa clone Clu_36710.scr.msk.p1.Contig3, mRNA sequence	LOC100152199	NM_032359.3	84319	C3orf26	chromosome 3 open reading frame 26	0	-0.85	-0.32	-0.77	-0.96	-1.08	-3.66	-1.97	-1.76	-2.39	0
gi|52351441|gb|AY609871.1|	52351441	AY609871.1	Sus scrofa clone Clu_36963.scr.msk.p1.Contig1, mRNA sequence		NM_014392.3	27065	D4S234E	DNA segment on chromosome 4 (unique) 234 expressed sequence	0	-2.98	-3.88	-5.65	-5.61	-12.99	-12.99	-12.99	-12.99	-12.99	0
gi|52351444|gb|AY609874.1|	52351444	AY609874.1	Sus scrofa clone Clu_3706.scr.msk.p1.Contig4, mRNA sequence		BC029350.1	22931	RAB18	RAB18, member RAS oncogene family	0	-0.87	-0.99	-1.2	-1.13	-0.99	-1.49	-1.74	-2.99	-2.9	0
gi|52351445|gb|AY609875.1|	52351445	AY609875.1	Sus scrofa clone Clu_3723.scr.msk.p1.Contig3, mRNA sequence		BC063116.1	57396	CLK4	CDC-like kinase 4	0	-0.05	-0.05	0.06	-0.16	-1.03	-1.18	-1.59	-1.98	-2.36	0
gi|52351454|gb|AY609884.1|	52351454	AY609884.1	Sus scrofa clone Clu_3792.scr.msk.p1.Contig2, mRNA sequence	TRA2A	AK314801.1	29896	TRA2A	transformer 2 alpha homolog (Drosophila)	0	0.04	-0.25	-0.24	-0.64	-1.1	-1.03	-2	-3.59	-2.54	0
gi|52351462|gb|AY609892.1|	52351462	AY609892.1	Sus scrofa clone Clu_38560.scr.msk.p1.Contig2, mRNA sequence		CR608592.1	26022	TMEM98	transmembrane protein 98	0	-0.09	-0.69	-0.47	-1.35	-4.1	-2.31	-2.2	-3.87	-5.09	0
gi|52351478|gb|AY609908.1|	52351478	AY609908.1	Sus scrofa clone Clu_42251.scr.msk.p1.Contig1, mRNA sequence		BC008456.1	644	BLVRA	biliverdin reductase A	0	0.62	0.05	-0.44	-1.03	-0.94	-0.94	-0.99	-2.4	-1.36	0
gi|52351485|gb|AY609915.1|	52351485	AY609915.1	Sus scrofa clone Clu_4362.scr.msk.p1.Contig1, mRNA sequence		NM_014171.4	9419	CRIPT	cysteine-rich PDZ-binding protein	0	-0.27	0.1	-0.17	-0.24	-0.77	-0.81	-1.71	-0.7	-0.89	0
gi|52351523|gb|AY609953.1|	52351523	AY609953.1	Sus scrofa clone Clu_47347.scr.msk.p1.Contig2, mRNA sequence		NM_014042.2	25906	C11orf51	chromosome 11 open reading frame 51	0	-1.09	-0.61	-0.74	-0.66	-1.77	-2.93	-2.36	-11.36	-11.36	0
gi|52351538|gb|AY609968.1|	52351538	AY609968.1	Sus scrofa clone Clu_4944.scr.msk.p1.Contig10, mRNA sequence		NM_012071.2	23412	COMMD3	COMM domain containing 3	0	0.18	0.39	0.54	0.19	0.02	-1.53	-1.29	-1.31	-1.18	0
gi|52351540|gb|AY609970.1|	52351540	AY609970.1	Sus scrofa clone Clu_4994.scr.msk.p1.Contig2, mRNA sequence		AK291943.1	10380	BPNT1	3'(2'), 5'-bisphosphate nucleotidase 1	0	2.26	0.92	0.8	1.28	0.49	0.08	-1.08	-3.56	-3.04	0
gi|52351547|gb|AY609977.1|	52351547	AY609977.1	Sus scrofa clone Clu_51220.scr.msk.p1.Contig1, mRNA sequence		BC132869.1	8988	HSPB3	heat shock 27kDa protein 3	0	1	0.51	-0.61	-1.21	0.1	-1.36	-1.24	-2.48	-0.69	0
gi|52351561|gb|AY609991.1|	52351561	AY609991.1	Sus scrofa clone Clu_5302.scr.msk.p1.Contig4, mRNA sequence		NM_012311.2	22944	KIN	KIN, antigenic determinant of recA protein homolog (mouse)	0	0.35	0.42	-0.53	0.2	-1.72	-1.06	-1.69	-2.04	-1.63	0
gi|52351566|gb|AY609996.1|	52351566	AY609996.1	Sus scrofa clone Clu_53659.scr.msk.p1.Contig4, mRNA sequence		BC015757.1	1716	DGUOK	deoxyguanosine kinase	0	-2.24	-0.74	-1.97	-1.35	-1.73	-4.21	-3.2	-10.32	-4.53	0
gi|52351574|gb|AY610004.1|	52351574	AY610004.1	Sus scrofa clone Clu_5494.scr.msk.p1.Contig1, mRNA sequence		NM_138335.1	132789	GNPDA2	glucosamine-6-phosphate deaminase 2	0	-0.57	-0.14	-0.25	-0.45	-1.02	-2.02	-2.52	-2.84	-4.41	0
gi|52351591|gb|AY610021.1|	52351591	AY610021.1	Sus scrofa clone Clu_5644.scr.msk.p1.Contig2, mRNA sequence		BC072427.1	6632	SNRPD1	small nuclear ribonucleoprotein D1 polypeptide 16kDa	0	0.94	0.71	0.38	0.07	-0.15	-3.38	-2.83	-4.27	-3.99	0
gi|52351593|gb|AY610023.1|	52351593	AY610023.1	Sus scrofa clone Clu_5658.scr.msk.p1.Contig1, mRNA sequence		AK289628.1	4969	OGN	osteoglycin	0	0.27	-1.33	-2.65	0.04	-1.69	-3.5	-6.13	-14.25	-8.47	0
gi|52351606|gb|AY610036.1|	52351606	AY610036.1	Sus scrofa clone Clu_59328.scr.msk.p1.Contig1, mRNA sequence		NM_014035.2	28966	SNX24	sorting nexin 24	0	-2.08	-1.15	-2	-2.19	-3.56	-3.45	-9.56	-9.56	-9.56	0
gi|52351619|gb|AY610049.1|	52351619	AY610049.1	Sus scrofa clone Clu_60266.scr.msk.p1.Contig2, mRNA sequence		NM_004615.3	7102	TSPAN7	tetraspanin 7	0	-0.65	-0.65	-1.24	-1.63	-2.73	-1.88	-3.44	-11.98	-11.98	0
gi|52351621|gb|AY610051.1|	52351621	AY610051.1	Sus scrofa clone Clu_60320.scr.msk.p1.Contig1, mRNA sequence		NM_006600.2	10726	NUDC	nuclear distribution gene C homolog (A. nidulans)	0	-0.68	-0.26	-0.13	-0.4	-0.88	-1.3	-1.05	-3.24	-3	0
gi|52351674|gb|AY610104.1|	52351674	AY610104.1	Sus scrofa clone Clu_7116.scr.msk.p1.Contig1, mRNA sequence		BC008226.1	90390	MED30	mediator complex subunit 30	0	0.92	0.96	0.97	0.35	-1.34	-1.75	-2.4	-2.91	-2.4	0
gi|52351677|gb|AY610107.1|	52351677	AY610107.1	Sus scrofa clone Clu_71340.scr.msk.p1.Contig1, mRNA sequence		NM_012117.2	23468	CBX5	chromobox homolog 5 (HP1 alpha homolog, Drosophila)	0	-0.04	0.2	0.03	-0.57	0.15	-0.67	-1.02	-1.58	-2.13	0
gi|52351702|gb|AY610132.1|	52351702	AY610132.1	Sus scrofa clone Clu_7783.scr.msk.p1.Contig1, mRNA sequence		CR622624.1	10190	TXNDC9	thioredoxin domain containing 9	0	-0.92	-0.69	-0.34	-0.65	-0.45	-1.63	-1.26	-2.71	-2.98	0
gi|52351709|gb|AY610139.1|	52351709	AY610139.1	Sus scrofa clone Clu_78870.scr.msk.p1.Contig2, mRNA sequence		BC017019.1	25972	UNC50	unc-50 homolog (C. elegans)	0	0.5	0.06	-0.28	-0.45	-0.8	-0.33	-2.07	-2.28	-1.23	0
gi|52351719|gb|AY610149.1|	52351719	AY610149.1	Sus scrofa clone Clu_80595.scr.msk.p1.Contig2, mRNA sequence		AK290666.1	51077	FCF1	FCF1 small subunit (SSU) processome component homolog (S. cerevisiae)	0	-0.65	-0.03	-0.3	-0.17	-0.85	-2.9	-2.47	-2.62	-1.77	0
gi|52351745|gb|AY610175.1|	52351745	AY610175.1	Sus scrofa clone Clu_8578.scr.msk.p1.Contig1, mRNA sequence		NM_002370.2	4116	MAGOH	mago-nashi homolog, proliferation-associated (Drosophila)	0	0.45	0.9	0.44	0.23	-0.71	-2.49	-3.8	-1.53	-1.61	0
gi|52351761|gb|AY610191.1|	52351761	AY610191.1	Sus scrofa clone Clu_91551.scr.msk.p1.Contig1, mRNA sequence		NM_006335.2	10440	TIMM17A	translocase of inner mitochondrial membrane 17 homolog A (yeast)	0	-0.09	-0.33	-0.26	-0.38	0.58	-0.43	-1.28	-1.6	-2.1	0
gi|52351890|gb|AY610308.1|	52351890	AY610308.1	Sus scrofa clone rcut39_i19.y1.abd, mRNA sequence		NM_016060.2	51003	MED31	mediator complex subunit 31	0	-1.2	-0.81	-0.51	-0.9	-1.23	-1.72	-1.52	-1.55	-1.6	0
gi|52351951|gb|AY610369.1|	52351951	AY610369.1	Sus scrofa clone reje29b_a13.y1.abd, mRNA sequence		NM_014463.2	27258	LSM3	LSM3 homolog, U6 small nuclear RNA associated (S. cerevisiae)	0	0.73	0.48	0.46	-0.14	0.29	-0.08	-0.76	-8.88	-8.88	0
gi|52351986|gb|AY610402.1|	52351986	AY610402.1	Sus scrofa clone rhlv17b_g12.y1.abd, mRNA sequence		BC010908.1	54987	C1orf123	chromosome 1 open reading frame 123	0	-0.65	-0.62	-0.69	-0.75	-1.56	-1.25	-0.88	-4.95	-3.7	0
gi|52352028|gb|AY610444.1|	52352028	AY610444.1	Sus scrofa clone rmed03c_e6.y1.abd, mRNA sequence	LOC100153133	NM_007019.2	11065	UBE2C	ubiquitin-conjugating enzyme E2C	0	-2.61	-2.6	-3.44	-4.86	-11	-11	-11	-11	-11	0
gi|52352037|gb|AY610453.1|	52352037	AY610453.1	Sus scrofa clone rmed14c_j24.y1.abd, mRNA sequence		NM_152793.2	222166	C7orf41	chromosome 7 open reading frame 41	0	-1.96	-1.14	-1.44	-2.33	-10.9	-4.79	-10.9	-10.9	-5.12	0
gi|52352044|gb|AY610460.1|	52352044	AY610460.1	Sus scrofa clone rnca01b_h5.y1.abd, mRNA sequence		NM_001659.2	377	ARF3	ADP-ribosylation factor 3	0	-2.66	-2.23	-2.19	-1.8	-1.95	-3.85	-2.42	-9.95	-9.95	0
gi|52352072|gb|AY610488.1|	52352072	AY610488.1	Sus scrofa clone rsto220_i4.y1.abd, mRNA sequence		BC106055.1	6637	SNRPG	small nuclear ribonucleoprotein polypeptide G	0	-1.69	-1.54	-2.45	-2.74	-0.99	-2.74	-3.31	-3.98	-3.77	0
gi|52352084|gb|AY610500.1|	52352084	AY610500.1	Sus scrofa clone rthg35_l12.y1.abd, mRNA sequence		NM_012133.4	26958	COPG2	coatomer protein complex, subunit gamma 2	0	0.59	0.66	0.2	0.28	-0.17	-0.07	-1.08	-9.42	-9.42	0
gi|52352708|gb|AY609628.1|	52352708	AY609628.1	Sus scrofa clone Clu_21971.scr.msk.p1.Contig2, mRNA sequence		NM_018010.3	55081	IFT57	intraflagellar transport 57 homolog (Chlamydomonas)	0	-0.98	-1.18	-1.57	-2.04	-2.67	-1.94	-3.02	-11.37	-11.37	0
gi|52352717|gb|AY609637.1|	52352717	AY609637.1	Sus scrofa clone Clu_2249.scr.msk.p1.Contig1, mRNA sequence		NM_001031692.2	10234	LRRC17	leucine rich repeat containing 17	0	-0.41	-0.77	-1.54	-2.17	-11.69	-11.69	-11.69	-11.69	-11.69	0
gi|52352721|gb|AY609641.1|	52352721	AY609641.1	Sus scrofa clone Clu_22932.scr.msk.p1.Contig1, mRNA sequence		NM_001584.2	744	MPPED2	metallophosphoesterase domain containing 2	0	-4.02	-4.29	-4.75	-3.35	-5.5	-4.82	-4.97	-11.5	-5.72	0
gi|52352724|gb|AY609644.1|	52352724	AY609644.1	Sus scrofa clone Clu_23171.scr.msk.p1.Contig2, mRNA sequence		NM_014184.2	29097	CNIH4	cornichon homolog 4 (Drosophila)	0	-0.8	-0.45	-0.49	-0.84	-0.67	-1.04	-1.61	-2.27	-2.85	0
gi|54020965|ref|NM_001005726.1|	54020965	NM_001005726.1	Sus scrofa annexin A2 (ANXA2), mRNA	ANXA2	NM_004039.2	302	ANXA2	annexin A2	0	-0.23	-0.52	-1.14	-1.73	-2.39	-2.6	-2.91	-3.44	-3.64	0
gi|55742657|ref|NM_213964.1|	55742657	NM_213964.1	Sus scrofa huntingtin (HDH), mRNA	HDH	BC172756.1	3064	HTT	huntingtin	0	-0.14	-0.15	-0.85	-0.71	-1.59	-3.24	-1.94	-2.48	-2.69	0
gi|55742741|ref|NM_213920.1|	55742741	NM_213920.1	Sus scrofa decorin (DCN), mRNA	DCN	NM_001920.3	1634	DCN	decorin	0	0.29	0.7	0.4	0.11	-1.98	-2.76	-2.82	-2.26	-1.97	0
gi|56792885|gb|AY705918.1|	56792885	AY705918.1	Sus scrofa clone sus_zm44 unknown mRNA		AC125453.6	100286951	LOC100286951	hypothetical protein LOC100286951	0	-0.06	3.31	4.06	-5.55	-5.55	-5.55	-5.55	-5.55	-5.55	0
gi|57528019|ref|NM_001009581.1|	57528019	NM_001009581.1	Sus scrofa peripherial benzodiazepine receptor associated protein (PAP7), mRNA	PAP7	NM_022735.3	64746	ACBD3	acyl-Coenzyme A binding domain containing 3	0	-1.74	-1.29	-1.24	-1.87	-1.93	-2.97	-1.61	-2.28	-2.22	0
gi|57528034|ref|NM_001009582.1|	57528034	NM_001009582.1	Sus scrofa stathmin-1 (LOC494463), mRNA	LOC494463	BC082228.1	3925	STMN1	stathmin 1	0	1.07	0.41	-0.03	-1.17	-4.87	-4.33	-4.05	-4.8	-4.79	0
gi|6007613|gb|AF120099.1|AF120099	6007613	AF120099.1	Sus scrofa chloride-bicarbonate anion exchanger AE2 (AE2) mRNA, partial cds	SLC4A2	AK295767.1	6522	SLC4A2	solute carrier family 4, anion exchanger, member 2 (erythrocyte membrane protein band 3-like 1)	0	-1.58	-1.05	-1.81	-1.79	-2.91	-3.91	-4.29	-11.82	-4.44	0
gi|61097882|ref|NM_001012956.1|	61097882	NM_001012956.1	Sus scrofa phosphoinositide-3-kinase, class 3 (PIK3C3), mRNA	PIK3C3	BC053651.1	5289	PIK3C3	phosphoinositide-3-kinase, class 3	0	-1.33	-0.9	-1.11	-1.08	-1.25	-2.74	-3.79	-3.08	-3.27	0
gi|61696631|gb|AY803094.1|	61696631	AY803094.1	Sus scrofa chromosome 17 clone pkmCon24, mRNA sequence		NM_198935.1	26039	SS18L1	synovial sarcoma translocation gene on chromosome 18-like 1	0	1.01	0.8	0.64	0.3	-0.99	-1.95	-1.52	-2.33	-2.14	0
gi|61696657|gb|AY803120.1|	61696657	AY803120.1	Sus scrofa chromosome 17 clone pkmCon93, mRNA sequence		AB033045.3	57148	RALGAPB	Ral GTPase activating protein, beta subunit (non-catalytic)	0	-0.51	-0.58	-0.7	-1.05	-1.17	-1.43	-1.33	-1.22	-1.02	0
gi|6581130|gb|AF210153.1|AF210153	6581130	AF210153.1	Sus scrofa nuclear export factor CRM1 mRNA, partial cds	XPO1	AK316481.1	7514	XPO1	exportin 1 (CRM1 homolog, yeast)	0	-2.38	-2.17	-2.59	-1.15	-1.97	-2.76	-10.67	-10.67	-10.67	0
gi|6606277|gb|AF159382.1|AF159382	6606277	AF159382.1	Sus scrofa biglycan mRNA, partial cds	BGN	NM_001711.4	633	BGN	biglycan	0	-1.25	-0.32	-1.3	-1.78	-1.47	-3.95	-10.05	-10.05	-10.05	0
gi|72535167|ref|NM_001031778.1|	72535167	NM_001031778.1	Sus scrofa mannose-6-phosphate receptor binding protein 1 (M6PRBP1), mRNA	PLIN3	AK291104.1	10226	PLIN3	perilipin 3	0	-1.16	-0.92	-1.03	-1.89	-2.5	-2.76	-4.14	-4	-4.56	0
gi|72535201|ref|NM_001031794.1|	72535201	NM_001031794.1	Sus scrofa secreted protein, acidic, cysteine-rich (osteonectin) (SPARC), mRNA	SPARC	NM_003118.2	6678	SPARC	secreted protein, acidic, cysteine-rich (osteonectin)	0	-1.61	-0.75	-0.35	-0.34	-1.26	-3.45	-2.91	-8.5	-7.58	0
gi|73853881|ref|NM_001032355.1|	73853881	NM_001032355.1	Sus scrofa DNA (cytosine-5-)-methyltransferase 1 (DNMT1), mRNA	DNMT1	NM_001379.2	1786	DNMT1	DNA (cytosine-5-)-methyltransferase 1	0	-0.96	-1.07	-1.29	-1.55	-2.86	-3.68	-5.42	-6.1	-11.95	0
gi|73853893|ref|NM_001032358.1|	73853893	NM_001032358.1	Sus scrofa phosphatidylinositol glycan anchor biosynthesis, class K (PIGK), mRNA	PIGK	NM_005482.2	10026	PIGK	phosphatidylinositol glycan anchor biosynthesis, class K	0	-1.67	-1.19	-1.94	-1.48	-1.28	-2.27	-2.05	-6.43	-5.91	0
gi|74024908|ref|NM_001032379.1|	74024908	NM_001032379.1	Sus scrofa MOB1, Mps One Binder kinase activator-like 3 (yeast) (MOBKL3), mRNA	MOBKL3	NM_015387.3	25843	MOBKL3	MOB1, Mps One Binder kinase activator-like 3 (yeast)	0	0.04	-0.07	-0.36	-0.2	0.2	-1.2	-0.75	-1.25	-1.74	0
gi|77681320|dbj|AB236885.1|	77681320	AB236885.1	Sus scrofa mRNA for hypothetical protein, partial cds, note: PCR product	LOC733581	AK055136.1	130132	RFTN2	raftlin family member 2	0	-2.89	-2.17	-2.22	-2.54	-2.38	-3.2	-2.63	-11.63	-11.63	0
gi|77745211|gb|DQ222847.1|	77745211	DQ222847.1	Sus scrofa procollagen-lysine 2-oxoglutarate 5-dioxygenase 2 (Plod2) mRNA, partial cds	PLOD2	NM_182943.2	5352	PLOD2	procollagen-lysine, 2-oxoglutarate 5-dioxygenase 2	0	-3.24	-2.88	-3.32	-5.98	-3.08	-5.43	-5	-11.54	-11.54	0
gi|80971505|ref|NM_001037147.1|	80971505	NM_001037147.1	Sus scrofa caspase-15 (LOC641352), mRNA	LOC641352	NG_008354.1	5630	PRPH	peripherin	0	-4.2	-1.82	-2.61	-1.95	-2.69	-9.69	-9.69	-9.69	-9.69	0
gi|82617535|ref|NM_001037322.1|	82617535	NM_001037322.1	Sus scrofa ST8 alpha-N-acetyl-neuraminide alpha-2,8-sialyltransferase 4 (ST8SIA4), mRNA	ST8SIA4	NM_005668.4	7903	ST8SIA4	ST8 alpha-N-acetyl-neuraminide alpha-2,8-sialyltransferase 4	0	0.28	-0.51	-0.76	0.3	-1.4	-3.85	-5.22	-5.9	-4.65	0
gi|83816982|ref|NM_001037964.1|	83816982	NM_001037964.1	Sus scrofa Cbp/p300-interacting transactivator, with Glu/Asp-rich carboxy-terminal domain, 1 (CITED1), mRNA	CITED1	NM_001144886.1	4435	CITED1	Cbp/p300-interacting transactivator, with Glu/Asp-rich carboxy-terminal domain, 1	0	1.96	2.32	2.38	0.01	-7.73	-1.63	-7.73	-7.73	-7.73	0
gi|83816988|ref|NM_001037965.1|	83816988	NM_001037965.1	Sus scrofa inhibitor of DNA binding 2 (ID2), mRNA	ID2	BC030639.2	3398	ID2	inhibitor of DNA binding 2, dominant negative helix-loop-helix protein	0	-2.66	-3.07	-3.89	-2.58	-5.23	-3.43	-5.7	-5.04	-6.45	0
gi|83921624|ref|NM_001037998.1|	83921624	NM_001037998.1	Sus scrofa mucosal vascular addressin cell adhesion molecule 1 (MADCAM1), mRNA	MADCAM1	BC136408.1	8174	MADCAM1	mucosal vascular addressin cell adhesion molecule 1	0	0.21	-0.51	-1.36	-1.39	-10.21	-10.21	-10.21	-10.21	-10.21	0
gi|83921642|ref|NM_001038007.1|	83921642	NM_001038007.1	Sus scrofa splicing factor, arginine/serine-rich 1 (SFRS1), mRNA	SFRS1	NM_006924.4	6426	SFRS1	splicing factor, arginine/serine-rich 1	0	-1.09	-0.78	-0.96	-1.08	-1.22	-2.26	-2.66	-5.21	-4.41	0
gi|84490426|ref|NM_001038639.1|	84490426	NM_001038639.1	Sus scrofa transforming growth factor, beta receptor 1 (TGFBR1), mRNA	TGFBR1	NM_004612.2	7046	TGFBR1	transforming growth factor, beta receptor 1	0	-2.96	-2.19	-2.21	-2.4	-2.45	-3.66	-9.77	-9.77	-9.77	0
gi|84490428|ref|NM_001038636.1|	84490428	NM_001038636.1	Sus scrofa paralemmin-1 (LOC654410), mRNA	LOC654410	NM_002579.2	5064	PALM	paralemmin	0	-2.62	-3.26	-2.53	-3.6	-2.29	-3.19	-5.21	-5.89	-11.75	0
gi|84490432|ref|NM_001038631.1|	84490432	NM_001038631.1	Sus scrofa microsomal prostaglandin E synthase-1 (LOC654407), mRNA	LOC654407	NM_004878.4	9536	PTGES	prostaglandin E synthase	0	-3.5	-0.82	0.16	-1.25	-3.99	-3.88	-9.99	-9.99	-9.99	0
gi|85838731|gb|DQ351713.1|	85838731	DQ351713.1	Sus scrofa ASPIC mRNA, partial cds	LOC100037974	AJ421515.1	55118	CRTAC1	cartilage acidic protein 1	0	-1.57	-2.3	-3.18	-3.96	-2.93	-9.52	-9.52	-3.66	-9.52	0
gi|89886174|ref|NM_001039749.1|	89886174	NM_001039749.1	Sus scrofa dickkopf homolog 3 (DKK3), mRNA	DKK3	AK289897.1	27122	DKK3	dickkopf homolog 3 (Xenopus laevis)	0	-2.53	-1.92	-3.08	-5.39	-4.54	-11.54	-11.54	-11.54	-11.54	0
gi|89886176|ref|NM_001039750.1|	89886176	NM_001039750.1	Sus scrofa metaxin 1 (MTX1), mRNA	MTX1	AK313863.1	4580	MTX1	metaxin 1	0	0.7	-0.74	-0.29	0.77	0.48	-2.04	-1.84	-3.08	-2.36	0
gi|91176934|gb|DQ450676.1|	91176934	DQ450676.1	Sus scrofa activin receptor IIA (Acvr2) mRNA, 3' UTR		AK301629.1	92	ACVR2A	activin A receptor, type IIA	0	-1.78	-2.38	-2.13	-2.42	-2.78	-10.79	-3.26	-4.35	-10.79	0
gi|92020085|dbj|AB237776.1|	92020085	AB237776.1	Sus scrofa COL6A1 mRNA fortype VI collagen alpha-1 chain, partial cds, N-terminal domain	COL6A1	AK299396.1	1291	COL6A1	collagen, type VI, alpha 1	0	-1.04	-1.18	-1.27	-1.64	-2.11	-2.69	-10.12	-10.12	-10.12	0
gi|9802381|gb|AF281156.1|AF281156	9802381	AF281156.1	Sus scrofa homeobox protein A10 mRNA, partial cds	HOXD10A	NM_153715.3	3206	HOXA10	homeobox A10	0	-3.01	-2.8	-3.92	-2.3	-10.67	-10.67	-3.55	-10.67	-10.67	0
gnl|UG|Ssc#S11319326	27921465	CB097273	554207 MARC 2PIG Sus scrofa cDNA 5', mRNA sequence						0	-1.3	-1.11	-0.76	-0.6	-1.52	-2.27	-3.15	-9.69	-9.69	0
gnl|UG|Ssc#S14766645	28578562	CB287608	CMD63_F02_16 UMNMPM3 Sus scrofa cDNA clone PPSUBLIB_48F02 5', mRNA sequence						0	0.21	0.58	0.77	0.52	-0.48	-0.54	-0.88	-0.47	-1.14	0
gnl|UG|Ssc#S14767529	28577218	CB286264	CMD33_G08_56 UMNMPM3 Sus scrofa cDNA clone PPSUBLIB_13G08 5', mRNA sequence						0	0.35	0.85	0.81	1.21	-3.53	-3.01	-1.41	-1.93	-2.16	0
gnl|UG|Ssc#S14898398	29289292	CB482906	jns99_H01.f jns Sus scrofa cDNA 5', mRNA sequence						0	0.37	0.4	0.29	0.19	-1.14	-0.13	-1.17	-4.93	-4	0
gnl|UG|Ssc#S14902233	29289659	CB483273	jns05_E07.r jns Sus scrofa cDNA 3', mRNA sequence						0	-1.9	-2.21	-3.01	-2.51	-3.5	-10.08	-3.55	-10.08	-10.08	0
gnl|UG|Ssc#S15981094	31663223	CD572156	PBL_15_C08 Porcine Brain Library Sus scrofa cDNA clone PBL 5', mRNA sequence						0	-2.81	-2.71	-4.13	-4.06	-2.74	-3.29	-3.67	-11.21	-11.21	0
gnl|UG|Ssc#S15981393	31663522	CD572455	PBL_2_D01 Porcine Brain Library Sus scrofa cDNA clone PBL 5', mRNA sequence						0	0.03	0.32	1.08	0.01	-8.26	-2.15	-8.26	-8.26	-8.26	0
gnl|UG|Ssc#S15981469	31663598	CD572531	PBL_4_B08 Porcine Brain Library Sus scrofa cDNA clone PBL 5', mRNA sequence						0	-4.8	-2.88	-3.54	-3.72	-10.29	-3.6	-10.29	-10.29	-10.29	0
gnl|UG|Ssc#S16350384	32948545	AU295982	AU295982 full-length enriched pig cDNA library, main and accessory olfactory bulb Sus scrofa cDNA clone olf_Con23 5', mRNA sequence						0	-4.8	-3.88	-10.29	-10.29	-10.29	-10.29	-10.29	-10.29	-10.29	0
gnl|UG|Ssc#S16350386	32948547	AU295984	AU295984 full-length enriched pig cDNA library, main and accessory olfactory bulb Sus scrofa cDNA clone olf_Con25 5', mRNA sequence						0	-2.92	-3	-9.73	-9.73	-9.73	-9.73	-9.73	-9.73	-9.73	0
gnl|UG|Ssc#S16350727	32948888	AU296325	AU296325 full-length enriched pig cDNA library, main and accessory olfactory bulb Sus scrofa cDNA clone olf_081_G01 5', mRNA sequence						0	-3.78	-2.44	-3.51	-4.29	-3.85	-9.85	-9.85	-9.85	-9.85	0
gnl|UG|Ssc#S16350749	32948910	AU296347	AU296347 full-length enriched pig cDNA library, main and accessory olfactory bulb Sus scrofa cDNA clone olf_091_A09 5', mRNA sequence						0	-4.45	-3.3	-10.52	-3.95	-3.52	-10.52	-10.52	-10.52	-10.52	0
gnl|UG|Ssc#S16350901	32949062	AU296499	AU296499 full-length enriched pig cDNA library, main and accessory olfactory bulb Sus scrofa cDNA clone olf_111_E05 5', mRNA sequence						0	-1.56	-1.54	-1.11	-0.93	-3.95	-3.27	-3.42	-9.95	-9.95	0
gnl|UG|Ssc#S16444449	33145724	CF106657	ZP0913G1 Pig liver cDNA Sus scrofa cDNA clone 13G1 similar to Integrin Alpha-6 (ITGA6), mRNA sequence						0	-0.77	1.01	-0.01	-0.06	-2.19	-2.09	-1.95	-10.65	-10.65	0
gnl|UG|Ssc#S16512862	33288131	CF176355	800425 MARC 3PIG Sus scrofa cDNA 3', mRNA sequence						0	-0.3	-0.58	-0.93	-0.31	-1.37	-3.01	-2.57	-3.83	-9.69	0
gnl|UG|Ssc#S16513476	33288763	CF176987	805422 MARC 3PIG Sus scrofa cDNA 5', mRNA sequence						0	0.41	0.48	0.92	0.85	-0.18	-1.08	-1.54	-1.69	-1.64	0
gnl|UG|Ssc#S16513514	33288801	CF177025	805462 MARC 3PIG Sus scrofa cDNA 5', mRNA sequence						0	1.85	1.78	1.08	0.44	-9.26	-3.15	-9.26	-3.4	-9.26	0
gnl|UG|Ssc#S16513524	33288811	CF177035	805472 MARC 3PIG Sus scrofa cDNA 5', mRNA sequence						0	-1.99	-1.78	-2.57	-2.08	-2.65	-2.54	-9.65	-9.65	-9.65	0
gnl|UG|Ssc#S16513699	33288959	CF177183	805639 MARC 3PIG Sus scrofa cDNA 5', mRNA sequence						0	-1.08	-1.88	-1.13	-0.73	1.64	-7.88	-7.88	-7.88	-7.88	0
gnl|UG|Ssc#S16514147	33289407	CF177631	806125 MARC 3PIG Sus scrofa cDNA 5', mRNA sequence						0	-0.67	-0.6	-1.25	-1.56	-4.65	-2.74	-3.12	-2.98	-4.87	0
gnl|UG|Ssc#S16514249	33289509	CF177733	806239 MARC 3PIG Sus scrofa cDNA 5', mRNA sequence						0	-1.08	-2.07	-1.89	-0.33	-2.47	-2.22	-2.11	-10.65	-10.65	0
gnl|UG|Ssc#S16514775	33290035	CF178259	807308 MARC 3PIG Sus scrofa cDNA 5', mRNA sequence						0	0.99	0.46	0.08	-0.23	-2.9	-2.53	-4.04	-4.7	-4.19	0
gnl|UG|Ssc#S16515033	33290293	CF178517	807597 MARC 3PIG Sus scrofa cDNA 5', mRNA sequence						0	-0.95	-0.42	-0.5	-0.21	-1.94	-1.84	-0.29	-2.34	-3.25	0
gnl|UG|Ssc#S16515596	33290888	CF179112	813202 MARC 3PIG Sus scrofa cDNA 5', mRNA sequence						0	-1.92	-1.62	-2.65	-0.77	-1.73	-3.62	-9.73	-9.73	-9.73	0
gnl|UG|Ssc#S16515841	33291133	CF179357	813476 MARC 3PIG Sus scrofa cDNA 5', mRNA sequence						0	-1.06	-0.08	-0.02	0.22	-1.73	-11.19	-4.65	-11.19	-11.19	0
gnl|UG|Ssc#S16515995	33291255	CF179479	813608 MARC 3PIG Sus scrofa cDNA 5', mRNA sequence						0	-4.15	-4.54	-4.61	-2.93	-4.37	-10.95	-10.95	-5.1	-10.95	0
gnl|UG|Ssc#S16516581	33291871	CF180095	815155 MARC 3PIG Sus scrofa cDNA 3', mRNA sequence						0	-1.33	-1.48	-1.02	-1.49	0.11	-2.68	-2.11	-3.24	-3.73	0
gnl|UG|Ssc#S16517614	33292874	CF181098	817895 MARC 3PIG Sus scrofa cDNA 5', mRNA sequence						0	-0.6	-0.71	-1.3	-0.49	0.07	-1.77	-3.17	-4.33	-4.72	0
gnl|UG|Ssc#S16517655	33292915	CF181139	817941 MARC 3PIG Sus scrofa cDNA 5', mRNA sequence						0	-3.66	-3	-3.03	-3.66	-2.99	-4.63	-4.79	-12.32	-12.32	0
gnl|UG|Ssc#S16518132	33293392	CF181616	818465 MARC 3PIG Sus scrofa cDNA 5', mRNA sequence						0	0.55	1.95	1.78	0.48	-0.26	-8.26	-8.26	-8.26	-8.26	0
gnl|UG|Ssc#S16761675	34155831	CF359270	819021 MARC 3PIG Sus scrofa cDNA 5', mRNA sequence						0	-2.58	-1.92	-2.3	-2.49	-4.23	-10.23	-10.23	-10.23	-10.23	0
gnl|UG|Ssc#S16761843	34156164	CF359438	819201 MARC 3PIG Sus scrofa cDNA 5', mRNA sequence						0	-3.02	-2.3	-3.18	-3.37	-9.52	-9.52	-9.52	-9.52	-9.52	0
gnl|UG|Ssc#S16762226	34156947	CF359830	821103 MARC 3PIG Sus scrofa cDNA 3', mRNA sequence						0	-2.45	-2.3	-2.76	-1.36	-2.93	-9.52	-9.52	-9.52	-9.52	0
gnl|UG|Ssc#S16763114	34158848	CF360790	827079 MARC 3PIG Sus scrofa cDNA 5', mRNA sequence						0	2.51	1.19	0.91	1.19	-0.7	-8.02	-0.9	-2.16	-8.02	0
gnl|UG|Ssc#S16763723	34159872	CF361318	827643 MARC 3PIG Sus scrofa cDNA 5', mRNA sequence						0	1.61	0.73	2.18	1.62	-0.22	-1.12	-1.69	-8.81	-8.81	0
gnl|UG|Ssc#S16763939	34160303	CF361534	827871 MARC 3PIG Sus scrofa cDNA 5', mRNA sequence						0	-1.08	-0.66	-0.65	-0.56	-1.62	-2.72	-2.14	-4.18	-3.08	0
gnl|UG|Ssc#S16764113	34160636	CF361708	828059 MARC 3PIG Sus scrofa cDNA 5', mRNA sequence						0	-2.1	-1.15	-1.62	-2.02	-4.02	-4.47	-3.74	-5.82	-13.28	0
gnl|UG|Ssc#S16764287	34160982	CF361882	828250 MARC 3PIG Sus scrofa cDNA 5', mRNA sequence						0	-4.05	-2.71	-3.36	-2.74	-2.11	-10.12	-10.12	-10.12	-10.12	0
gnl|UG|Ssc#S16764444	34161299	CF362039	828423 MARC 3PIG Sus scrofa cDNA 5', mRNA sequence						0	0.12	-0.25	-1.06	-0.39	-0.93	-1.83	-2.4	-4.66	-2.56	0
gnl|UG|Ssc#S16764603	34161620	CF362198	829443 MARC 3PIG Sus scrofa cDNA 3', mRNA sequence						0	-2.47	-2.67	-3.2	-4.98	-10.54	-10.54	-10.54	-10.54	-10.54	0
gnl|UG|Ssc#S16764894	34162250	CF362512	830187 MARC 3PIG Sus scrofa cDNA 3', mRNA sequence						0	-1.12	-0.92	-0.73	-0.37	-1.86	-1.63	-1.75	-11.19	-11.19	0
gnl|UG|Ssc#S16766114	34164608	CF363709	833605 MARC 3PIG Sus scrofa cDNA 5', mRNA sequence						0	-0.04	-0.28	-0.31	0.15	-1.96	-3.66	-2.65	-9.77	-9.77	0
gnl|UG|Ssc#S16766302	34164981	CF363897	833804 MARC 3PIG Sus scrofa cDNA 5', mRNA sequence						0	-0.9	-1.09	-1.39	-1.01	-3.08	-3.98	-10.67	-10.67	-10.67	0
gnl|UG|Ssc#S16767126	34166603	CF364721	834717 MARC 3PIG Sus scrofa cDNA 5', mRNA sequence						0	-1.5	-0.42	-0.44	-0.66	-0.98	-2.04	-3.32	-10.85	-10.85	0
gnl|UG|Ssc#S16767178	34166705	CF364773	834775 MARC 3PIG Sus scrofa cDNA 5', mRNA sequence						0	3.12	1.74	1.26	-0.65	-1.02	-1.34	-8.02	-8.02	-2.24	0
gnl|UG|Ssc#S16767260	34166863	CF364855	834862 MARC 3PIG Sus scrofa cDNA 5', mRNA sequence						0	0.64	-0.9	-1.43	-0.39	-3.19	-9.77	-9.77	-3.91	-9.77	0
gnl|UG|Ssc#S16768404	34169166	CF366003	836675 MARC 3PIG Sus scrofa cDNA 3', mRNA sequence						0	0.01	-0.91	-0.56	-0.78	-2.97	-4.45	-3.44	-2.37	-10.56	0
gnl|UG|Ssc#S16769298	34170914	CF366893	841599 MARC 3PIG Sus scrofa cDNA 5', mRNA sequence						0	-3.56	-3.07	-3.71	-4.5	-10.05	-3.37	-10.05	-10.05	-10.05	0
gnl|UG|Ssc#S16769299	34170916	CF366894	841600 MARC 3PIG Sus scrofa cDNA 5', mRNA sequence						0	-1.5	-1.35	-2.16	-2.22	-2.79	-3.81	-4.52	-4.34	-6.59	0
gnl|UG|Ssc#S16769389	34171091	CF366984	841693 MARC 3PIG Sus scrofa cDNA 5', mRNA sequence						0	-0.19	-0.09	-0.76	-0.6	-1.03	-2.14	-2.44	-2.37	-2.97	0
gnl|UG|Ssc#S16769740	34171785	CF367335	842072 MARC 3PIG Sus scrofa cDNA 5', mRNA sequence						0	0.13	0.45	-0.11	0.17	-2.09	-1.84	-10.26	-4.4	-10.26	0
gnl|UG|Ssc#S16769741	34171787	CF367336	842073 MARC 3PIG Sus scrofa cDNA 5', mRNA sequence						0	-0.11	0.07	-0.51	-0.81	-2.31	-3.5	-5.23	-2.45	-2.98	0
gnl|UG|Ssc#S16770026	34172342	CF367621	842383 MARC 3PIG Sus scrofa cDNA 5', mRNA sequence						0	0.31	0.17	-0.33	-0.84	-2.14	-2.04	-9.73	-9.73	-9.73	0
gnl|UG|Ssc#S17057579	37596874	CF722620	A11_LKF002 UMNMPM3 Sus scrofa cDNA clone PPSL_18A011 5', mRNA sequence						0	-1.31	-1.28	-0.98	-1.48	-3.44	-10.44	-3.33	-10.44	-10.44	0
gnl|UG|Ssc#S17057662	37597017	CF722763	H06_LKF003 UMNMPM3 Sus scrofa cDNA clone PPSL_16G06 5', mRNA sequence						0	-0.41	-0.35	0.2	0.51	-1.83	-0.58	0.09	-9.15	-9.15	0
gnl|UG|Ssc#S17499549	37791566	CF787005	854864 MARC 4PIG Sus scrofa cDNA 5', mRNA sequence						0	-2.58	-2.13	-1.23	-1.02	-0.53	-2.13	-3.7	-10.23	-10.23	0
gnl|UG|Ssc#S17499579	37791596	CF787035	854896 MARC 4PIG Sus scrofa cDNA 5', mRNA sequence						0	-0.74	-0.09	1.11	1.08	-0.27	-3.02	-2.15	-1.88	-5.41	0
gnl|UG|Ssc#S17500017	37792034	CF787473	855375 MARC 4PIG Sus scrofa cDNA 5', mRNA sequence						0	0.48	0.46	0.63	0.42	0.19	0.28	-0.06	-3.73	-3.8	0
gnl|UG|Ssc#S17500019	37792036	CF787475	855377 MARC 4PIG Sus scrofa cDNA 5', mRNA sequence						0	-2.86	-3.12	-4	-10.34	-3.34	-3.66	-10.34	-10.34	-10.34	0
gnl|UG|Ssc#S17500137	37792154	CF787593	855510 MARC 4PIG Sus scrofa cDNA 5', mRNA sequence						0	-4.45	-2.79	-2.95	-4.96	-10.52	-1.61	-10.52	-10.52	-10.52	0
gnl|UG|Ssc#S17503019	37795036	CF790475	875606 MARC 4PIG Sus scrofa cDNA 5', mRNA sequence						0	-0.8	-0.68	-0.44	-0.6	-1.43	-1.05	-1.08	-1.13	-1.87	0
gnl|UG|Ssc#S17503771	37795788	CF791227	879396 MARC 4PIG Sus scrofa cDNA 5', mRNA sequence						0	-2.22	-2.47	-2.58	-2.52	-4.09	-12.09	-5.55	-12.09	-12.09	0
gnl|UG|Ssc#S17503882	37795899	CF791338	879522 MARC 4PIG Sus scrofa cDNA 5', mRNA sequence						0	-0.91	-0.57	-0.58	-0.71	-1.57	-2.53	-2.81	-3.2	-4.05	0
gnl|UG|Ssc#S17504107	37796124	CF791563	879763 MARC 4PIG Sus scrofa cDNA 5', mRNA sequence						0	1.43	1.35	0.7	0.51	-2.14	-2.04	-8.14	-8.14	-8.14	0
gnl|UG|Ssc#S17504953	37796982	CF792421	885352 MARC 4PIG Sus scrofa cDNA 3', mRNA sequence						0	-0.59	-0.67	-0.6	-0.86	-9.88	-3.2	-3.35	-9.88	-9.88	0
gnl|UG|Ssc#S17506191	37798208	CF793647	889067 MARC 4PIG Sus scrofa cDNA 5', mRNA sequence						0	0.8	0.31	-0.28	-0.39	-2.81	-2.71	-1.55	-1.16	-1.82	0
gnl|UG|Ssc#S17506862	37798885	CF794318	889818 MARC 4PIG Sus scrofa cDNA 5', mRNA sequence						0	1.04	1.96	1.22	0.1	-9.42	-9.42	-9.42	-9.42	-9.42	0
gnl|UG|Ssc#S17509842	113721549	BX664868	BX664868 Sus Scrofa library (scag) Sus scrofa cDNA clone scag0005.c.07 3prim, mRNA sequence						0	0.3	0.34	0.15	-0.36	-2.02	-0.98	-2.07	-1.28	-2.23	0
gnl|UG|Ssc#S17509854	113721659	BX664880	BX664880 Sus Scrofa library (scag) Sus scrofa cDNA clone scag0005.d.07 5prim, mRNA sequence						0	1.43	1.07	1.57	1.11	-0.75	-1.36	-1.37	-4.27	-3.34	0
gnl|UG|Ssc#S17509876	113721800	BX664902	BX664902 Sus Scrofa library (scag) Sus scrofa cDNA clone scag0005.f.10 5prim, mRNA sequence						0	-1.66	-1.49	-1.53	-2.65	-2.36	-3.11	-10.54	-10.54	-10.54	0
gnl|UG|Ssc#S17509892	113721815	BX664918	BX664918 Sus Scrofa library (scag) Sus scrofa cDNA clone scag0007.h.05 5prim, mRNA sequence						0	-0.5	-0.23	-0.94	-0.49	-1.33	-0.04	-1.55	-10.79	-10.79	0
gnl|UG|Ssc#S17509923	113721099	BX664949	BX664949 Sus Scrofa library (scag) Sus scrofa cDNA clone scag0008.c.06 5prim, mRNA sequence						0	-1.94	-1.67	-2.32	-2.31	-2.56	-9.88	-2.77	-9.88	-9.88	0
gnl|UG|Ssc#S17509925	113721101	BX664951	BX664951 Sus Scrofa library (scag) Sus scrofa cDNA clone scag0008.c.08 5prim, mRNA sequence						0	-2.71	-2.69	-3.05	-2.35	-1.46	-2.14	-4.2	-12.05	-12.05	0
gnl|UG|Ssc#S17509955	113721131	BX664981	BX664981 Sus Scrofa library (scag) Sus scrofa cDNA clone scag0002.c.07 5prim, mRNA sequence						0	-1	-0.47	-1.58	-0.91	0.25	-1.07	-2.22	-10.34	-10.34	0
gnl|UG|Ssc#S17510044	90227091	BX665070	BX665070 Sus Scrofa library (scag) Sus scrofa cDNA clone scag0003.b.08 5prim, mRNA sequence						0	-0.46	-0.02	-1.39	-1.44	-9.47	-9.47	-9.47	-9.47	-9.47	0
gnl|UG|Ssc#S17510145	90226999	BX665171	BX665171 Sus Scrofa library (scag) Sus scrofa cDNA clone scag0010.c.10 5prim, mRNA sequence						0	-1.88	-2.03	-2.61	-2.12	-1.99	-1.89	-2.83	-10.69	-10.69	0
gnl|UG|Ssc#S17510181	90227987	BX665207	BX665207 Sus Scrofa library (scag) Sus scrofa cDNA clone scag0003.e.11 5prim, mRNA sequence						0	-2.27	-1.98	-3.22	-1.53	-3.56	-2.88	-1.22	-9.56	-9.56	0
gnl|UG|Ssc#S17510214	90227972	BX665240	BX665240 Sus Scrofa library (scag) Sus scrofa cDNA clone scag0003.h.10 5prim, mRNA sequence						0	0.19	-0.48	-1.43	-1.62	-9.65	-2.96	-9.65	-9.65	-9.65	0
gnl|UG|Ssc#S17510311	90227921	BX665337	BX665337 Sus Scrofa library (scag) Sus scrofa cDNA clone scag0006.d.04 5prim, mRNA sequence						0	-1.28	-0.88	-1.26	-1.72	-1.78	-1.56	-2.25	-11.87	-6.09	0
gnl|UG|Ssc#S17510396	90233975	BX665422	BX665422 Sus Scrofa library (scag) Sus scrofa cDNA clone scag0006.f.11 5prim, mRNA sequence	ISG15					0	-0.31	-0.75	-1.32	-0.59	-0.74	-0.81	-1.78	-1.18	-1.6	0
gnl|UG|Ssc#S17510452	90234031	BX665478	BX665478 Sus Scrofa library (scag) Sus scrofa cDNA clone scag0008.h.01 5prim, mRNA sequence						0	-0.45	-0.58	-0.68	-1.2	-2.08	-1.83	-2.78	-2.33	-2.38	0
gnl|UG|Ssc#S17510463	90234042	BX665489	BX665489 Sus Scrofa library (scag) Sus scrofa cDNA clone scag0008.h.07 5prim, mRNA sequence						0	0.31	-0.18	0.33	0.45	-0.9	-1.48	-1.37	-2.04	-2.01	0
gnl|UG|Ssc#S17510467	90233947	BX665493	BX665493 Sus Scrofa library (scag) Sus scrofa cDNA clone scag0008.h.11 5prim, mRNA sequence						0	1.19	1.5	0.75	1.59	-1.47	-1.36	-1.35	-1.28	-2.09	0
gnl|UG|Ssc#S17510489	90233926	BX665515	BX665515 Sus Scrofa library (scag) Sus scrofa cDNA clone scag0009.b.10 5prim, mRNA sequence						0	-0.95	-1.04	-1	-1.58	-2.54	-2.49	-2.22	-3.14	-2.75	0
gnl|UG|Ssc#S17510517	90233943	BX665543	BX665543 Sus Scrofa library (scag) Sus scrofa cDNA clone scag0009.d.10 5prim, mRNA sequence						0	-0.55	0.63	0.83	1.39	-0.4	-2.62	-2.19	-8.73	-8.73	0
gnl|UG|Ssc#S17510547	90233918	BX665573	BX665573 Sus Scrofa library (scag) Sus scrofa cDNA clone scag0009.g.03 5prim, mRNA sequence						0	-0.13	-0.25	0.27	0.32	-1.47	-1.76	-3.01	-2.09	-3.08	0
gnl|UG|Ssc#S17510601	90235121	BX665627	BX665627 Sus Scrofa library (scag) Sus scrofa cDNA clone scag0007.g.05 5prim, mRNA sequence						0	-1.36	-0.41	-0.97	-1.59	-1.2	-1.81	-3.51	-5.51	-11.37	0
gnl|UG|Ssc#S17510665	90235177	BX665691	BX665691 Sus Scrofa library (scag) Sus scrofa cDNA clone scag0011.c.05 3prim, mRNA sequence						0	0.73	-0.01	-0.48	-0.82	-2.55	-2.23	-2.29	-3.28	-1.45	0
gnl|UG|Ssc#S17510715	90235227	BX665741	BX665741 Sus Scrofa library (scag) Sus scrofa cDNA clone scag0011.g.01 5prim, mRNA sequence						0	-0.29	-1.19	-1.38	-1.57	-3.52	-5.58	-4.16	-5.83	-5.91	0
gnl|UG|Ssc#S17510761	90235870	BX666107	BX666107 Sus Scrofa library (scag) Sus scrofa cDNA clone scag0007.a.07 3prim, mRNA sequence						0	-4.58	-3.66	-4.31	-4.5	-10.65	-10.65	-10.65	-10.65	-10.65	0
gnl|UG|Ssc#S17510766	90235875	BX666112	BX666112 Sus Scrofa library (scag) Sus scrofa cDNA clone scag0007.b.04 3prim, mRNA sequence						0	0.22	-1.11	-1	-1.15	-3.5	-2.87	-4.55	-3.81	-3.07	0
gnl|UG|Ssc#S17510986	90236559	BX666448	BX666448 Sus Scrofa library (scag) Sus scrofa cDNA clone scag0008.g.07 3prim, mRNA sequence						0	0.44	0.79	1.14	1.58	0.58	-0.21	-2.21	-4.46	-4.95	0
gnl|UG|Ssc#S17511034	90237342	BX666496	BX666496 Sus Scrofa library (scag) Sus scrofa cDNA clone scag0003.h.04 3prim, mRNA sequence						0	-1.91	-2.04	-2.3	-1.73	-1.39	-1.29	-2.77	-11.3	-11.3	0
gnl|UG|Ssc#S17511146	90237451	BX666608	BX666608 Sus Scrofa library (scag) Sus scrofa cDNA clone scag0011.g.11 3prim, mRNA sequence						0	0.25	0.36	0.29	0.4	-1.54	-2.19	-2.66	-4.24	-4.31	0
gnl|UG|Ssc#S17511213	90238864	BX667085	BX667085 Sus Scrofa library (scag) Sus scrofa cDNA clone scag0010.b.09 3prim, mRNA sequence						0	-2.68	-2.75	-1.79	-1.69	-4.48	-11.07	-11.07	-11.07	-11.07	0
gnl|UG|Ssc#S17511261	90241683	BX667335	BX667335 Sus Scrofa library (scag) Sus scrofa cDNA clone scag0002.d.04 5prim, mRNA sequence						0	-0.45	-0.23	-0.76	-0.91	-1.82	-0.76	-1.21	-1.75	-1.89	0
gnl|UG|Ssc#S17511420	90241837	BX667494	BX667494 Sus Scrofa library (scag) Sus scrofa cDNA clone scag0001.h.05 3prim, mRNA sequence						0	-0.15	-1.36	-1.64	-1.72	-2.59	-5.57	-4.56	-3.23	-4.09	0
gnl|UG|Ssc#S17511660	90235808	BX665955	BX665955 Sus Scrofa library (scac) Sus scrofa cDNA clone scac0027.p.04 3prim, mRNA sequence						0	3.65	2.23	0.46	3.04	0.12	2.03	-6.88	-6.88	-6.88	0
gnl|UG|Ssc#S17512032	37856593	BX666875	BX666875 Sus Scrofa library (scac) Sus scrofa cDNA clone scac0025i.o.05 3prim, mRNA sequence						0	-0.72	0.07	0.2	-0.52	0.63	-3.62	-3.19	-2.06	-3.95	0
gnl|UG|Ssc#S17512035	126026161	BX666878	BX666878 Sus Scrofa library (scac) Sus scrofa cDNA clone scac0025.o.10 3prim, mRNA sequence						0	1.12	0.71	0.28	0.61	-1.31	-1.51	-1.46	-0.5	-1.62	0
gnl|UG|Ssc#S17512116	90237679	BX666959	BX666959 Sus Scrofa library (scac) Sus scrofa cDNA clone scac0027.b.08 3prim, mRNA sequence						0	-1.08	-1.03	-1.54	-1.57	-0.82	-1.29	-1.49	-1.52	-2.38	0
gnl|UG|Ssc#S17512128	37856689	BX666971	BX666971 Sus Scrofa library (scac) Sus scrofa cDNA clone scac0027i.c.02 3prim, mRNA sequence						0	-1.41	-0.02	-0.07	-0.27	-0.65	-1.58	-0.86	-1.64	-2.19	0
gnl|UG|Ssc#S17512203	90238918	BX667147	BX667147 Sus Scrofa library (scac) Sus scrofa cDNA clone scac0026.j.08 3prim, mRNA sequence						0	-1.06	-0.97	-0.69	-0.91	-1.85	-3.83	-2.4	-10.94	-10.94	0
gnl|UG|Ssc#S17512256	90238959	BX667200	BX667200 Sus Scrofa library (scac) Sus scrofa cDNA clone scac0026.m.24 3prim, mRNA sequence						0	-0.74	-0.68	-1.03	-2.29	-1.85	-2.07	-2.64	-10.18	-10.18	0
gnl|UG|Ssc#S17512262	90238964	BX667206	BX667206 Sus Scrofa library (scac) Sus scrofa cDNA clone scac0026.n.06 3prim, mRNA sequence						0	-0.24	-0.59	-1	-1.23	-1.44	-2.81	-3.55	-4.22	-2.71	0
gnl|UG|Ssc#S17512292	117784118	BX667236	BX667236 Sus Scrofa library (scac) Sus scrofa cDNA clone scac0027.g.17 3prim, mRNA sequence						0	0.44	0.16	-0.12	-1.31	-11.43	-5.32	-11.43	-11.43	-11.43	0
gnl|UG|Ssc#S17512305	90238995	BX667249	BX667249 Sus Scrofa library (scac) Sus scrofa cDNA clone scac0027.h.17 3prim, mRNA sequence						0	2.94	2.76	2.23	1.15	-7.88	-7.88	-1.34	-7.88	-7.88	0
gnl|UG|Ssc#S17512346	90241641	BX667290	BX667290 Sus Scrofa library (scac) Sus scrofa cDNA clone scac0027.k.22 3prim, mRNA sequence						0	0.76	0.68	1.09	0.63	-0.19	-0.68	-1.02	-0.92	-0.58	0
gnl|UG|Ssc#S17513098	90243824	BX667667	BX667667 Sus Scrofa library (scac) Sus scrofa cDNA clone scac0026.f.09 5prim, mRNA sequence						0	0.1	0.32	0.32	0.34	-0.44	-0.62	-0.32	-0.9	-1.44	0
gnl|UG|Ssc#S17513253	90245662	BX667822	BX667822 Sus Scrofa library (scac) Sus scrofa cDNA clone scac0025.b.02 5prim, mRNA sequence						0	-0.29	0.22	0.37	-0.5	-1.7	-2.38	-2.27	-2.25	-2.12	0
gnl|UG|Ssc#S17513449	90245430	BX668018	BX668018 Sus Scrofa library (scac) Sus scrofa cDNA clone scac0026.p.19 5prim, mRNA sequence	COL5A1					0	-1.35	-0.77	-2.03	-2.32	-4.26	-5.76	-5.97	-3.95	-5.47	0
gnl|UG|Ssc#S17513547	90245948	BX668116	BX668116 Sus Scrofa library (scac) Sus scrofa cDNA clone scac0026.a.23 5prim, mRNA sequence						0	-4.07	-1.98	-2.81	-2.99	-2.24	-9.56	-9.56	-9.56	-9.56	0
gnl|UG|Ssc#S17513710	37976683	BX668279	BX668279 Sus Scrofa library (scac) Sus scrofa cDNA clone scac0027i.n.20 5prim, mRNA sequence						0	0.92	0.11	1.63	0.93	1.03	-1.2	-7.88	-7.88	-7.88	0
gnl|UG|Ssc#S17513715	90245884	BX668284	BX668284 Sus Scrofa library (scac) Sus scrofa cDNA clone scac0027.o.02 5prim, mRNA sequence						0	0.28	-0.17	-0.34	0.22	-1.14	-1.14	-1.29	-1.14	-1.26	0
gnl|UG|Ssc#S17513836	90246412	BX668405	BX668405 Sus Scrofa library (scac) Sus scrofa cDNA clone scac0025.h.08 5prim, mRNA sequence						0	-0.62	-0.63	-0.04	-0.41	-2.3	-2.52	-2.87	-2.82	-4.42	0
gnl|UG|Ssc#S17514069	126026162	BX668638	BX668638 Sus Scrofa library (scac) Sus scrofa cDNA clone scac0028.j.05 5prim, mRNA sequence						0	-0.21	-0.21	-0.37	-0.5	-1.39	-3.61	-2.67	-3.26	-3.6	0
gnl|UG|Ssc#S17514152	117784140	BX668721	BX668721 Sus Scrofa library (scac) Sus scrofa cDNA clone scac0030.m.21 5prim, mRNA sequence						0	-1.16	-0.29	-0.41	-0.64	-3.34	-3.23	-10.34	-10.34	-10.34	0
gnl|UG|Ssc#S17514217	113721645	BX668786	BX668786 Sus Scrofa library (scac) Sus scrofa cDNA clone scac0029.k.05 5prim, mRNA sequence						0	-2.35	-0.95	-0.9	-1.39	-2.27	-4.4	-2.55	-4.64	-11.09	0
gnl|UG|Ssc#S17514251	113721631	BX668820	BX668820 Sus Scrofa library (scac) Sus scrofa cDNA clone scac0029.l.15 5prim, mRNA sequence						0	-1.55	-1.41	-0.39	-1.07	-3.15	-9.73	-9.73	-9.73	-3.95	0
gnl|UG|Ssc#S17514318	90227211	BX668887	BX668887 Sus Scrofa library (scac) Sus scrofa cDNA clone scac0030.i.23 5prim, mRNA sequence						0	-0.77	0.22	0.65	0.24	-1.1	-2.14	-1.11	-4.07	-3.73	0
gnl|UG|Ssc#S17514325	90227215	BX668894	BX668894 Sus Scrofa library (scac) Sus scrofa cDNA clone scac0030.j.07 3prim, mRNA sequence						0	0.55	1.1	1.04	-2.62	-11.36	-11.36	-4.82	-11.36	-4.98	0
gnl|UG|Ssc#S17514578	90227684	BX669147	BX669147 Sus Scrofa library (scac) Sus scrofa cDNA clone scac0030.h.03 5prim, mRNA sequence						0	0.19	0.1	-0.35	0.01	-2.97	-3.29	-3.44	-2.2	-3.18	0
gnl|UG|Ssc#S17514753	117784205	BX669322	BX669322 Sus Scrofa library (scac) Sus scrofa cDNA clone scac0029.e.21 5prim, mRNA sequence						0	-1.82	-2.43	-3.84	-3.24	-3.11	-3.6	-4.98	-12.51	-12.51	0
gnl|UG|Ssc#S17514973	90235006	BX669542	BX669542 Sus Scrofa library (scac) Sus scrofa cDNA clone scac0029.o.09 5prim, mRNA sequence						0	0.51	-0.32	-0.61	-0.48	-9.37	-9.37	-9.37	-9.37	-9.37	0
gnl|UG|Ssc#S17515091	90234877	BX669660	BX669660 Sus Scrofa library (scac) Sus scrofa cDNA clone scac0028.a.19 5prim, mRNA sequence						0	-4.85	-3.62	-4	-3.45	-10.34	-10.34	-10.34	-10.34	-10.34	0
gnl|UG|Ssc#S17515108	90234899	BX669677	BX669677 Sus Scrofa library (scac) Sus scrofa cDNA clone scac0028.b.15 3prim, mRNA sequence						0	0.7	1.04	1.11	0.87	-1.61	-1.67	-1	-2.15	-3.03	0
gnl|UG|Ssc#S17515298	90236848	BX669867	BX669867 Sus Scrofa library (scac) Sus scrofa cDNA clone scac0030.o.15 5prim, mRNA sequence						0	-1.75	-1.28	-2.35	-1.87	-1.23	-1.78	-2.57	-10.69	-10.69	0
gnl|UG|Ssc#S17515524	90238067	BX670093	BX670093 Sus Scrofa library (scac) Sus scrofa cDNA clone scac0034.m.14 5prim, mRNA sequence						0	0.65	-0.98	-1.74	-2.51	-2.5	-9.08	-9.08	-9.08	-2.71	0
gnl|UG|Ssc#S17515541	90238057	BX670110	BX670110 Sus Scrofa library (scac) Sus scrofa cDNA clone scac0034.n.11 3prim, mRNA sequence						0	-0.58	-0.3	-0.51	-0.72	-1.91	-1.7	-2.75	-2.81	-3.5	0
gnl|UG|Ssc#S17515611	90238756	BX670180	BX670180 Sus Scrofa library (scac) Sus scrofa cDNA clone scac0035.f.07 5prim, mRNA sequence						0	-0.71	-0.45	-0.67	-0.72	-1.8	-2.04	-2.38	-3.73	-5.23	0
gnl|UG|Ssc#S17515725	90238702	BX670294	BX670294 Sus Scrofa library (scac) Sus scrofa cDNA clone scac0035.b.05 5prim, mRNA sequence						0	-2.66	-1.6	-2.13	-2.9	-3.47	-2.78	-9.47	-9.47	-9.47	0
gnl|UG|Ssc#S17516031	90243641	BX670600	BX670600 Sus Scrofa library (scac) Sus scrofa cDNA clone scac0033.e.04 3prim, mRNA sequence						0	-0.36	-3.04	-4.43	-1.74	-3.77	-4.08	-10.77	-10.77	-10.77	0
gnl|UG|Ssc#S17516151	90243608	BX670720	BX670720 Sus Scrofa library (scac) Sus scrofa cDNA clone scac0034.c.01 5prim, mRNA sequence						0	-1.88	-0.79	-1.61	-0.48	-1.63	-2.04	-1.25	-9.95	-9.95	0
gnl|UG|Ssc#S17516218	90243524	BX670787	BX670787 Sus Scrofa library (scac) Sus scrofa cDNA clone scac0033.o.05 5prim, mRNA sequence						0	-1.48	-1.43	-1.2	-1.53	-2.42	-2.73	-9.42	-9.42	-9.42	0
gnl|UG|Ssc#S17516301	90245531	BX670870	BX670870 Sus Scrofa library (scac) Sus scrofa cDNA clone scac0033.l.15 3prim, mRNA sequence						0	0.19	-0.15	-0.6	-0.22	-2.61	-2.44	-3.16	-3.83	-2.55	0
gnl|UG|Ssc#S17516362	90245265	BX670931	BX670931 Sus Scrofa library (scac) Sus scrofa cDNA clone scac0033.n.02 3prim, mRNA sequence						0	0.07	-0.45	-0.6	-0.73	-1.62	-2.81	-2.38	-3.41	-3.71	0
gnl|UG|Ssc#S17516605	90245733	BX671174	BX671174 Sus Scrofa library (scac) Sus scrofa cDNA clone scac0032.g.12 5prim, mRNA sequence						0	0.58	1.09	0.75	0.45	-2.43	-2.18	-2.26	-2.42	-3.23	0
gnl|UG|Ssc#S17516797	90246246	BX671366	BX671366 Sus Scrofa library (scac) Sus scrofa cDNA clone scac0033.i.19 3prim, mRNA sequence						0	-0.37	0.14	-0.23	-0.51	-0.52	-1.68	-1.83	-1.65	-1.65	0
gnl|UG|Ssc#S17516917	113721591	BX671486	BX671486 Sus Scrofa library (scac) Sus scrofa cDNA clone scac0036.f.18 3prim, mRNA sequence	CCNB1					0	-1.56	-1.95	-3.09	-2.84	-13.58	-7.47	-13.58	-6.39	-13.58	0
gnl|UG|Ssc#S17517048	113721411	BX671617	BX671617 Sus Scrofa library (scac) Sus scrofa cDNA clone scac0032.m.20 5prim, mRNA sequence						0	-0.73	-0.42	-1.25	-0.51	-2.88	-9.47	-2.35	-9.47	-9.47	0
gnl|UG|Ssc#S17517235	90226664	BX671804	BX671804 Sus Scrofa library (scac) Sus scrofa cDNA clone scac0032.p.11 3prim, mRNA sequence						0	0.35	0.36	-0.26	-0.49	-3.39	-2.64	-3.35	-3.02	-4.83	0
gnl|UG|Ssc#S17517424	90227524	BX671993	BX671993 Sus Scrofa library (scac) Sus scrofa cDNA clone scac0036.m.18 3prim, mRNA sequence						0	0.08	-0.1	-0.41	-0.38	-0.84	-1.26	-1.45	-0.63	-0.89	0
gnl|UG|Ssc#S17517581	90233645	BX672150	BX672150 Sus Scrofa library (scac) Sus scrofa cDNA clone scac0036.k.11 5prim, mRNA sequence						0	-0.29	-0.49	-0.85	-1.27	-0.56	-1.41	-3.3	-1.97	-2.17	0
gnl|UG|Ssc#S17517701	90234113	BX672270	BX672270 Sus Scrofa library (scac) Sus scrofa cDNA clone scac0035.m.17 5prim, mRNA sequence						0	-3.31	-3.71	-2.55	-2.55	-3.12	-10.12	-3	-10.12	-10.12	0
gnl|UG|Ssc#S17517759	90234418	BX672328	BX672328 Sus Scrofa library (scac) Sus scrofa cDNA clone scac0036.i.23 3prim, mRNA sequence						0	-2.39	-2.39	-1.86	-2.6	-3.94	-5.15	-11.26	-11.26	-11.26	0
gnl|UG|Ssc#S17517816	90234167	BX672385	BX672385 Sus Scrofa library (scac) Sus scrofa cDNA clone scac0034.g.12 3prim, mRNA sequence						0	-1.04	-0.49	-2.06	-0.51	-1.81	-2.56	-3.45	-4.13	-2.61	0
gnl|UG|Ssc#S17517865	90234081	BX672434	BX672434 Sus Scrofa library (scac) Sus scrofa cDNA clone scac0034.h.07 3prim, mRNA sequence						0	-0.53	-0.12	-0.91	-1.03	-1.46	-1.91	-2.06	-1.53	-1.38	0
gnl|UG|Ssc#S17517887	90234051	BX672456	BX672456 Sus Scrofa library (scac) Sus scrofa cDNA clone scac0034.h.22 5prim, mRNA sequence						0	0.8	1.62	1.2	0.95	0.03	0.77	-0.61	-8.14	-8.14	0
gnl|UG|Ssc#S17517894	90234058	BX672463	BX672463 Sus Scrofa library (scac) Sus scrofa cDNA clone scac0034.i.02 3prim, mRNA sequence						0	-0.74	-0.85	-1.3	-0.69	-1.32	-2.38	-3.12	-3.46	-3.54	0
gnl|UG|Ssc#S17517957	90234817	BX672526	BX672526 Sus Scrofa library (scac) Sus scrofa cDNA clone scac0034.e.13 5prim, mRNA sequence						0	-0.35	-0.9	-1.1	-2.52	-1.42	-2.11	-2.55	-10.67	-10.67	0
gnl|UG|Ssc#S17518103	90235414	BX672673	BX672673 Sus Scrofa library (scac) Sus scrofa cDNA clone scac0041.o.04 5prim, mRNA sequence						0	-1.74	-1.14	-1.16	-1.33	-2.95	-4.1	-3.09	-4.75	-3.83	0
gnl|UG|Ssc#S17518104	90235415	BX672674	BX672674 Sus Scrofa library (scac) Sus scrofa cDNA clone scac0041.o.05 5prim, mRNA sequence						0	-1.46	-1.04	-1.02	-1.1	-3.27	-3.46	-2.11	-11.73	-11.73	0
gnl|UG|Ssc#S17518157	90236745	BX672727	BX672727 Sus Scrofa library (scac) Sus scrofa cDNA clone scac0042.a.20 5prim, mRNA sequence						0	0.9	0.88	0.46	0.25	-1.11	-2.59	-1.86	-4.21	-2.36	0
gnl|UG|Ssc#S17518164	90236732	BX672734	BX672734 Sus Scrofa library (scac) Sus scrofa cDNA clone scac0042.b.03 5prim, mRNA sequence						0	0.01	0.1	-0.11	-0.04	-2.19	-1.95	-2.66	-2.65	-2.27	0
gnl|UG|Ssc#S17518211	90236774	BX672781	BX672781 Sus Scrofa library (scac) Sus scrofa cDNA clone scac0043.a.16 5prim, mRNA sequence						0	-1.21	-0.94	-1.17	-1.64	-3.25	-2.62	-2.43	-2.65	-4.31	0
gnl|UG|Ssc#S17518288	90236696	BX672858	BX672858 Sus Scrofa library (scac) Sus scrofa cDNA clone scac0040.f.04 5prim, mRNA sequence						0	-0.85	-1.42	-1.07	-1.72	-1.59	-1.73	-3.17	-10.29	-10.29	0
gnl|UG|Ssc#S17518410	90237931	BX672980	BX672980 Sus Scrofa library (scac) Sus scrofa cDNA clone scac0044.p.23 5prim, mRNA sequence						0	-0.11	-0.63	-0.63	-1.03	-3.85	-9.85	-9.85	-9.85	-9.85	0
gnl|UG|Ssc#S17518487	90237772	BX673057	BX673057 Sus Scrofa library (scac) Sus scrofa cDNA clone scac0039.c.01 5prim, mRNA sequence						0	1.62	2.13	1.28	1.18	-7.56	-7.56	-7.56	-7.56	-7.56	0
gnl|UG|Ssc#S17518491	90237776	BX673061	BX673061 Sus Scrofa library (scac) Sus scrofa cDNA clone scac0039.c.05 5prim, mRNA sequence						0	-0.29	-0.44	-0.09	-0.05	-1.5	-0.85	-2.09	-10.21	-10.21	0
gnl|UG|Ssc#S17518514	90237754	BX673084	BX673084 Sus Scrofa library (scac) Sus scrofa cDNA clone scac0039.d.05 5prim, mRNA sequence						0	0.91	0.42	0.88	0.99	-1.33	-1.65	-3.38	-3.05	-2.33	0
gnl|UG|Ssc#S17518575	90238591	BX673145	BX673145 Sus Scrofa library (scac) Sus scrofa cDNA clone scac0037.m.11 5prim, mRNA sequence						0	-0.52	-0.88	-0.28	-0.13	-2.06	-1.46	-2.11	-10.65	-10.65	0
[truncated: 6,687 more rows]

## Sheet: Landrace-postnatal
#gene identifier	pig_GI	pig_Genebank	pig_Description	pig_Gene symbol	human_Genebank	human_Gene ID	human_Gene	human_Gene description	2d	28d	90d	120d	180d	Profiles
[truncated: 4,106 more rows]

[truncated: 4 more sheets: Landrace-prenatal, Lantang-ten development stages, Lantang-postnatal, Lantang-prenatal]
