# Supplementary material for: Comparative Analyses by Sequencing of Transcriptomes during Skeletal Muscle Development between Pig Breeds Differing in Muscle Growth Rate and Fatness
Source: PLoS One. 2011 May 26;6(5):e19774. doi: 10.1371/journal.pone.0019774 (PMC3102668; doi:10.1371/journal.pone.0019774)
Supplement: Table S4 — The muscle developmental STC-GO of Landrace. (XLS) [file pone.0019774.s016.xls]

## Sheet: Landrace-profile 2 (dpc)
GO_id	GO_name	genebank	Gene symbol	Description	Pvalue	Enrichment
GO:0006271	DNA strand elongation during DNA replication	AK234166.1		Sus scrofa mRNA, clone:OVR010015F05, expressed in ovary	0.00275286	726.516
GO:0022616	DNA strand elongation	AK234166.1		Sus scrofa mRNA, clone:OVR010015F05, expressed in ovary	0.00275286	726.516
GO:0060272	embryonic skeletal joint morphogenesis	CJ024171		CJ024171 full-length enriched swine cDNA library, adult trachea Sus scrofa cDNA clone TCH01A020024 5', mRNA sequence	0.00275286	726.516
GO:0048704	embryonic skeletal system morphogenesis	CJ024171		CJ024171 full-length enriched swine cDNA library, adult trachea Sus scrofa cDNA clone TCH01A020024 5', mRNA sequence	0.0164623	121.086
GO:0006297	nucleotide-excision repair, DNA gap filling	AK234166.1		Sus scrofa mRNA, clone:OVR010015F05, expressed in ovary	0.0273642	72.6516
GO:0048705	skeletal system morphogenesis	CJ024171		CJ024171 full-length enriched swine cDNA library, adult trachea Sus scrofa cDNA clone TCH01A020024 5', mRNA sequence	0.0355025	55.8859
GO:0030199	collagen fibril organization	CJ024171		CJ024171 full-length enriched swine cDNA library, adult trachea Sus scrofa cDNA clone TCH01A020024 5', mRNA sequence	0.0382081	51.894
GO:0048706	embryonic skeletal system development	CJ024171		CJ024171 full-length enriched swine cDNA library, adult trachea Sus scrofa cDNA clone TCH01A020024 5', mRNA sequence	0.0409101	48.4344
GO:0048015	phosphoinositide-mediated signaling	AK234166.1		Sus scrofa mRNA, clone:OVR010015F05, expressed in ovary	0.0436084	45.4073
GO:0051216	cartilage development	CJ024171		CJ024171 full-length enriched swine cDNA library, adult trachea Sus scrofa cDNA clone TCH01A020024 5', mRNA sequence	0.0436084	45.4073
GO:0006261	DNA-dependent DNA replication	AK234166.1		Sus scrofa mRNA, clone:OVR010015F05, expressed in ovary	0.0623964	31.5877
GO:0007605	sensory perception of sound	CJ024171		CJ024171 full-length enriched swine cDNA library, adult trachea Sus scrofa cDNA clone TCH01A020024 5', mRNA sequence	0.0677323	29.0606
GO:0050954	sensory perception of mechanical stimulus	CJ024171		CJ024171 full-length enriched swine cDNA library, adult trachea Sus scrofa cDNA clone TCH01A020024 5', mRNA sequence	0.0677323	29.0606
GO:0030198	extracellular matrix organization	CJ024171		CJ024171 full-length enriched swine cDNA library, adult trachea Sus scrofa cDNA clone TCH01A020024 5', mRNA sequence	0.0757094	25.947
GO:0006289	nucleotide-excision repair	AK234166.1		Sus scrofa mRNA, clone:OVR010015F05, expressed in ovary	0.086296	22.7036
GO:0043062	extracellular structure organization	CJ024171		CJ024171 full-length enriched swine cDNA library, adult trachea Sus scrofa cDNA clone TCH01A020024 5', mRNA sequence	0.0941989	20.7576
GO:0007601	visual perception	CJ024171		CJ024171 full-length enriched swine cDNA library, adult trachea Sus scrofa cDNA clone TCH01A020024 5', mRNA sequence	0.0968262	20.181
GO:0050953	sensory perception of light stimulus	CJ024171		CJ024171 full-length enriched swine cDNA library, adult trachea Sus scrofa cDNA clone TCH01A020024 5', mRNA sequence	0.0968262	20.181
GO:0006457	protein folding	AK237371.1		Sus scrofa mRNA, clone:SPL010030A11, expressed in spleen	0.104687	18.6286
GO:0019932	second-messenger-mediated signaling	AK234166.1		Sus scrofa mRNA, clone:OVR010015F05, expressed in ovary	0.104687	18.6286
GO:0008203	cholesterol metabolic process	NM_214157.1	SREBF1	Sus scrofa sterol regulatory element binding transcription factor 1 (SREBF1), mRNA	0.117719	16.5117
GO:0016125	sterol metabolic process	NM_214157.1	SREBF1	Sus scrofa sterol regulatory element binding transcription factor 1 (SREBF1), mRNA	0.125496	15.4578
GO:0043123	positive regulation of I-kappaB kinase/NF-kappaB cascade	EW434658		rnco1936b_h9.y1 nco Sus scrofa cDNA 5', mRNA sequence	0.138389	13.9715
GO:0043122	regulation of I-kappaB kinase/NF-kappaB cascade	EW434658		rnco1936b_h9.y1 nco Sus scrofa cDNA 5', mRNA sequence	0.143522	13.454
GO:0048598	embryonic morphogenesis	CJ024171		CJ024171 full-length enriched swine cDNA library, adult trachea Sus scrofa cDNA clone TCH01A020024 5', mRNA sequence	0.143522	13.454
GO:0009792	embryonic development ending in birth or egg hatching	CJ024171		CJ024171 full-length enriched swine cDNA library, adult trachea Sus scrofa cDNA clone TCH01A020024 5', mRNA sequence	0.146084	13.2094
GO:0043009	chordate embryonic development	CJ024171		CJ024171 full-length enriched swine cDNA library, adult trachea Sus scrofa cDNA clone TCH01A020024 5', mRNA sequence	0.146084	13.2094
GO:0009888	tissue development	CJ024171		CJ024171 full-length enriched swine cDNA library, adult trachea Sus scrofa cDNA clone TCH01A020024 5', mRNA sequence	0.156296	12.3138
GO:0010740	positive regulation of protein kinase cascade	EW434658		rnco1936b_h9.y1 nco Sus scrofa cDNA 5', mRNA sequence	0.166453	11.532
GO:0007600	sensory perception	CJ024171		CJ024171 full-length enriched swine cDNA library, adult trachea Sus scrofa cDNA clone TCH01A020024 5', mRNA sequence	0.176556	10.8435
GO:0001501	skeletal system development	CJ024171		CJ024171 full-length enriched swine cDNA library, adult trachea Sus scrofa cDNA clone TCH01A020024 5', mRNA sequence	0.186605	10.2326
GO:0009967	positive regulation of signal transduction	EW434658		rnco1936b_h9.y1 nco Sus scrofa cDNA 5', mRNA sequence	0.201578	9.43527
GO:0010627	regulation of protein kinase cascade	EW434658		rnco1936b_h9.y1 nco Sus scrofa cDNA 5', mRNA sequence	0.204062	9.31431
GO:0010647	positive regulation of cell communication	EW434658		rnco1936b_h9.y1 nco Sus scrofa cDNA 5', mRNA sequence	0.204062	9.31431
GO:0050890	cognition	CJ024171		CJ024171 full-length enriched swine cDNA library, adult trachea Sus scrofa cDNA clone TCH01A020024 5', mRNA sequence	0.20902	9.08145
GO:0008202	steroid metabolic process	NM_214157.1	SREBF1	Sus scrofa sterol regulatory element binding transcription factor 1 (SREBF1), mRNA	0.211494	8.96933
GO:0006260	DNA replication	AK234166.1		Sus scrofa mRNA, clone:OVR010015F05, expressed in ovary	0.240925	7.812
GO:0009790	embryonic development	CJ024171		CJ024171 full-length enriched swine cDNA library, adult trachea Sus scrofa cDNA clone TCH01A020024 5', mRNA sequence	0.26269	7.12271
GO:0006066	cellular alcohol metabolic process	NM_214157.1	SREBF1	Sus scrofa sterol regulatory element binding transcription factor 1 (SREBF1), mRNA	0.272279	6.85393
GO:0050877	neurological system process	CJ024171		CJ024171 full-length enriched swine cDNA library, adult trachea Sus scrofa cDNA clone TCH01A020024 5', mRNA sequence	0.298386	6.20954
GO:0009887	organ morphogenesis	CJ024171		CJ024171 full-length enriched swine cDNA library, adult trachea Sus scrofa cDNA clone TCH01A020024 5', mRNA sequence	0.321789	5.7206
GO:0006281	DNA repair	AK234166.1		Sus scrofa mRNA, clone:OVR010015F05, expressed in ovary	0.367663	4.94229
GO:0044249	cellular biosynthetic process	AK234166.1		Sus scrofa mRNA, clone:OVR010015F05, expressed in ovary	0.380146	2.50092
GO:0044249	cellular biosynthetic process	NM_214157.1	SREBF1	Sus scrofa sterol regulatory element binding transcription factor 1 (SREBF1), mRNA	0.380146	2.50092
GO:0009058	biosynthetic process	AK234166.1		Sus scrofa mRNA, clone:OVR010015F05, expressed in ovary	0.390156	2.4586
GO:0009058	biosynthetic process	NM_214157.1	SREBF1	Sus scrofa sterol regulatory element binding transcription factor 1 (SREBF1), mRNA	0.390156	2.4586
GO:0008380	RNA splicing	DT334659		SusFleck_BF_0081_0084_5_pCNS_D21 SusFleck Backfat Sus scrofa cDNA clone 0081_0084_D21 5', mRNA sequence	0.392374	4.5982
GO:0034984	cellular response to DNA damage stimulus	AK234166.1		Sus scrofa mRNA, clone:OVR010015F05, expressed in ovary	0.40791	4.40313
GO:0009966	regulation of signal transduction	EW434658		rnco1936b_h9.y1 nco Sus scrofa cDNA 5', mRNA sequence	0.414524	4.3245
GO:0006397	mRNA processing	DT334659		SusFleck_BF_0081_0084_5_pCNS_D21 SusFleck Backfat Sus scrofa cDNA clone 0081_0084_D21 5', mRNA sequence	0.429853	4.15152
GO:0006974	response to DNA damage stimulus	AK234166.1		Sus scrofa mRNA, clone:OVR010015F05, expressed in ovary	0.434207	4.10461
GO:0033554	cellular response to stress	AK234166.1		Sus scrofa mRNA, clone:OVR010015F05, expressed in ovary	0.453652	3.906
GO:0016071	mRNA metabolic process	DT334659		SusFleck_BF_0081_0084_5_pCNS_D21 SusFleck Backfat Sus scrofa cDNA clone 0081_0084_D21 5', mRNA sequence	0.455799	3.88511
GO:0010646	regulation of cell communication	EW434658		rnco1936b_h9.y1 nco Sus scrofa cDNA 5', mRNA sequence	0.46222	3.82377
GO:0051716	cellular response to stimulus	AK234166.1		Sus scrofa mRNA, clone:OVR010015F05, expressed in ovary	0.474985	3.70671
GO:0003008	system process	CJ024171		CJ024171 full-length enriched swine cDNA library, adult trachea Sus scrofa cDNA clone TCH01A020024 5', mRNA sequence	0.498122	3.50974
GO:0034960	cellular biopolymer metabolic process	AK234166.1		Sus scrofa mRNA, clone:OVR010015F05, expressed in ovary	0.510366	2.04941
GO:0034960	cellular biopolymer metabolic process	DT334659		SusFleck_BF_0081_0084_5_pCNS_D21 SusFleck Backfat Sus scrofa cDNA clone 0081_0084_D21 5', mRNA sequence	0.510366	2.04941
GO:0006355	regulation of transcription, DNA-dependent	EW099172		rece40_h3.y1 ece Sus scrofa cDNA 5', mRNA sequence	0.512424	2.04365
GO:0006355	regulation of transcription, DNA-dependent	NM_214157.1	SREBF1	Sus scrofa sterol regulatory element binding transcription factor 1 (SREBF1), mRNA	0.512424	2.04365
GO:0006139	nucleobase, nucleoside, nucleotide and nucleic acid metabolic process	AK234166.1		Sus scrofa mRNA, clone:OVR010015F05, expressed in ovary	0.514482	2.03791
GO:0006139	nucleobase, nucleoside, nucleotide and nucleic acid metabolic process	DT334659		SusFleck_BF_0081_0084_5_pCNS_D21 SusFleck Backfat Sus scrofa cDNA clone 0081_0084_D21 5', mRNA sequence	0.514482	2.03791
GO:0007275	multicellular organismal development	CJ024171		CJ024171 full-length enriched swine cDNA library, adult trachea Sus scrofa cDNA clone TCH01A020024 5', mRNA sequence	0.522718	2.0153
GO:0007275	multicellular organismal development	EW099172		rece40_h3.y1 ece Sus scrofa cDNA 5', mRNA sequence	0.522718	2.0153
GO:0051252	regulation of RNA metabolic process	EW099172		rece40_h3.y1 ece Sus scrofa cDNA 5', mRNA sequence	0.524778	2.00973
GO:0051252	regulation of RNA metabolic process	NM_214157.1	SREBF1	Sus scrofa sterol regulatory element binding transcription factor 1 (SREBF1), mRNA	0.524778	2.00973
GO:0006259	DNA metabolic process	AK234166.1		Sus scrofa mRNA, clone:OVR010015F05, expressed in ovary	0.54338	3.17256
GO:0044238	primary metabolic process	AK234166.1		Sus scrofa mRNA, clone:OVR010015F05, expressed in ovary	0.588882	1.45376
GO:0044238	primary metabolic process	AK237371.1		Sus scrofa mRNA, clone:SPL010030A11, expressed in spleen	0.588882	1.45376
GO:0044238	primary metabolic process	DT334659		SusFleck_BF_0081_0084_5_pCNS_D21 SusFleck Backfat Sus scrofa cDNA clone 0081_0084_D21 5', mRNA sequence	0.588882	1.45376
GO:0044238	primary metabolic process	NM_214157.1	SREBF1	Sus scrofa sterol regulatory element binding transcription factor 1 (SREBF1), mRNA	0.588882	1.45376
GO:0044255	cellular lipid metabolic process	NM_214157.1	SREBF1	Sus scrofa sterol regulatory element binding transcription factor 1 (SREBF1), mRNA	0.612675	2.75196
GO:0045449	regulation of transcription	EW099172		rece40_h3.y1 ece Sus scrofa cDNA 5', mRNA sequence	0.6154	1.79166
GO:0045449	regulation of transcription	NM_214157.1	SREBF1	Sus scrofa sterol regulatory element binding transcription factor 1 (SREBF1), mRNA	0.6154	1.79166
GO:0006396	RNA processing	DT334659		SusFleck_BF_0081_0084_5_pCNS_D21 SusFleck Backfat Sus scrofa cDNA clone 0081_0084_D21 5', mRNA sequence	0.63949	2.61337
GO:0019219	regulation of nucleobase, nucleoside, nucleotide and nucleic acid metabolic process	EW099172		rece40_h3.y1 ece Sus scrofa cDNA 5', mRNA sequence	0.650258	1.71956
GO:0019219	regulation of nucleobase, nucleoside, nucleotide and nucleic acid metabolic process	NM_214157.1	SREBF1	Sus scrofa sterol regulatory element binding transcription factor 1 (SREBF1), mRNA	0.650258	1.71956
GO:0009653	anatomical structure morphogenesis	CJ024171		CJ024171 full-length enriched swine cDNA library, adult trachea Sus scrofa cDNA clone TCH01A020024 5', mRNA sequence	0.650828	2.55816
GO:0034961	cellular biopolymer biosynthetic process	AK234166.1		Sus scrofa mRNA, clone:OVR010015F05, expressed in ovary	0.671377	2.46277
GO:0043284	biopolymer biosynthetic process	AK234166.1		Sus scrofa mRNA, clone:OVR010015F05, expressed in ovary	0.671377	2.46277
GO:0044260	cellular macromolecule metabolic process	AK234166.1		Sus scrofa mRNA, clone:OVR010015F05, expressed in ovary	0.691137	1.44245
GO:0044260	cellular macromolecule metabolic process	AK237371.1		Sus scrofa mRNA, clone:SPL010030A11, expressed in spleen	0.691137	1.44245
GO:0044260	cellular macromolecule metabolic process	DT334659		SusFleck_BF_0081_0084_5_pCNS_D21 SusFleck Backfat Sus scrofa cDNA clone 0081_0084_D21 5', mRNA sequence	0.691137	1.44245
GO:0010468	regulation of gene expression	EW099172		rece40_h3.y1 ece Sus scrofa cDNA 5', mRNA sequence	0.702187	1.62169
GO:0010468	regulation of gene expression	NM_214157.1	SREBF1	Sus scrofa sterol regulatory element binding transcription factor 1 (SREBF1), mRNA	0.702187	1.62169
GO:0010556	regulation of macromolecule biosynthetic process	EW099172		rece40_h3.y1 ece Sus scrofa cDNA 5', mRNA sequence	0.714326	1.60026
GO:0010556	regulation of macromolecule biosynthetic process	NM_214157.1	SREBF1	Sus scrofa sterol regulatory element binding transcription factor 1 (SREBF1), mRNA	0.714326	1.60026
GO:0043170	macromolecule metabolic process	AK234166.1		Sus scrofa mRNA, clone:OVR010015F05, expressed in ovary	0.718134	1.4098
GO:0043170	macromolecule metabolic process	AK237371.1		Sus scrofa mRNA, clone:SPL010030A11, expressed in spleen	0.718134	1.4098
GO:0043170	macromolecule metabolic process	DT334659		SusFleck_BF_0081_0084_5_pCNS_D21 SusFleck Backfat Sus scrofa cDNA clone 0081_0084_D21 5', mRNA sequence	0.718134	1.4098
GO:0032501	multicellular organismal process	CJ024171		CJ024171 full-length enriched swine cDNA library, adult trachea Sus scrofa cDNA clone TCH01A020024 5', mRNA sequence	0.718364	1.59324
GO:0032501	multicellular organismal process	EW099172		rece40_h3.y1 ece Sus scrofa cDNA 5', mRNA sequence	0.718364	1.59324
GO:0009889	regulation of biosynthetic process	EW099172		rece40_h3.y1 ece Sus scrofa cDNA 5', mRNA sequence	0.721391	1.58801
GO:0009889	regulation of biosynthetic process	NM_214157.1	SREBF1	Sus scrofa sterol regulatory element binding transcription factor 1 (SREBF1), mRNA	0.721391	1.58801
GO:0031326	regulation of cellular biosynthetic process	EW099172		rece40_h3.y1 ece Sus scrofa cDNA 5', mRNA sequence	0.721391	1.58801
GO:0031326	regulation of cellular biosynthetic process	NM_214157.1	SREBF1	Sus scrofa sterol regulatory element binding transcription factor 1 (SREBF1), mRNA	0.721391	1.58801
GO:0006629	lipid metabolic process	NM_214157.1	SREBF1	Sus scrofa sterol regulatory element binding transcription factor 1 (SREBF1), mRNA	0.738299	2.1883
GO:0048513	organ development	CJ024171		CJ024171 full-length enriched swine cDNA library, adult trachea Sus scrofa cDNA clone TCH01A020024 5', mRNA sequence	0.764489	2.09371
GO:0034645	cellular macromolecule biosynthetic process	AK234166.1		Sus scrofa mRNA, clone:OVR010015F05, expressed in ovary	0.786762	2.0181
GO:0007242	intracellular signaling cascade	AK234166.1		Sus scrofa mRNA, clone:OVR010015F05, expressed in ovary	0.790154	2.00695
GO:0009059	macromolecule biosynthetic process	AK234166.1		Sus scrofa mRNA, clone:OVR010015F05, expressed in ovary	0.790154	2.00695
GO:0030154	cell differentiation	EW099172		rece40_h3.y1 ece Sus scrofa cDNA 5', mRNA sequence	0.793536	1.99592
GO:0060255	regulation of macromolecule metabolic process	EW099172		rece40_h3.y1 ece Sus scrofa cDNA 5', mRNA sequence	0.799191	1.46328
GO:0060255	regulation of macromolecule metabolic process	NM_214157.1	SREBF1	Sus scrofa sterol regulatory element binding transcription factor 1 (SREBF1), mRNA	0.799191	1.46328
GO:0032502	developmental process	CJ024171		CJ024171 full-length enriched swine cDNA library, adult trachea Sus scrofa cDNA clone TCH01A020024 5', mRNA sequence	0.80313	1.4574
GO:0032502	developmental process	EW099172		rece40_h3.y1 ece Sus scrofa cDNA 5', mRNA sequence	0.80313	1.4574
GO:0031323	regulation of cellular metabolic process	EW099172		rece40_h3.y1 ece Sus scrofa cDNA 5', mRNA sequence	0.813933	1.4415
GO:0031323	regulation of cellular metabolic process	NM_214157.1	SREBF1	Sus scrofa sterol regulatory element binding transcription factor 1 (SREBF1), mRNA	0.813933	1.4415
GO:0019222	regulation of metabolic process	EW099172		rece40_h3.y1 ece Sus scrofa cDNA 5', mRNA sequence	0.820786	1.43156
GO:0019222	regulation of metabolic process	NM_214157.1	SREBF1	Sus scrofa sterol regulatory element binding transcription factor 1 (SREBF1), mRNA	0.820786	1.43156
GO:0016070	RNA metabolic process	DT334659		SusFleck_BF_0081_0084_5_pCNS_D21 SusFleck Backfat Sus scrofa cDNA clone 0081_0084_D21 5', mRNA sequence	0.844812	1.83928
GO:0048869	cellular developmental process	EW099172		rece40_h3.y1 ece Sus scrofa cDNA 5', mRNA sequence	0.860897	1.79387
GO:0010467	gene expression	DT334659		SusFleck_BF_0081_0084_5_pCNS_D21 SusFleck Backfat Sus scrofa cDNA clone 0081_0084_D21 5', mRNA sequence	0.969034	1.52629
GO:0048522	positive regulation of cellular process	EW434658		rnco1936b_h9.y1 nco Sus scrofa cDNA 5', mRNA sequence	0.984872	1.49182
GO:0006950	response to stress	AK234166.1		Sus scrofa mRNA, clone:OVR010015F05, expressed in ovary	1	1.44437
GO:0007154	cell communication	AK234166.1		Sus scrofa mRNA, clone:OVR010015F05, expressed in ovary	1	0.831254
GO:0007165	signal transduction	AK234166.1		Sus scrofa mRNA, clone:OVR010015F05, expressed in ovary	1	0.898042
GO:0016043	cellular component organization	CJ024171		CJ024171 full-length enriched swine cDNA library, adult trachea Sus scrofa cDNA clone TCH01A020024 5', mRNA sequence	1	0.933825
GO:0019538	protein metabolic process	AK237371.1		Sus scrofa mRNA, clone:SPL010030A11, expressed in spleen	1	0.795746
GO:0043283	biopolymer metabolic process	AK234166.1		Sus scrofa mRNA, clone:OVR010015F05, expressed in ovary	1	1.04385
GO:0043283	biopolymer metabolic process	DT334659		SusFleck_BF_0081_0084_5_pCNS_D21 SusFleck Backfat Sus scrofa cDNA clone 0081_0084_D21 5', mRNA sequence	1	1.04385
GO:0044267	cellular protein metabolic process	AK237371.1		Sus scrofa mRNA, clone:SPL010030A11, expressed in spleen	1	0.80545
GO:0048518	positive regulation of biological process	EW434658		rnco1936b_h9.y1 nco Sus scrofa cDNA 5', mRNA sequence	1	1.36307
GO:0048731	system development	CJ024171		CJ024171 full-length enriched swine cDNA library, adult trachea Sus scrofa cDNA clone TCH01A020024 5', mRNA sequence	1	1.3682
GO:0048856	anatomical structure development	CJ024171		CJ024171 full-length enriched swine cDNA library, adult trachea Sus scrofa cDNA clone TCH01A020024 5', mRNA sequence	1	1.16243
GO:0050896	response to stimulus	AK234166.1		Sus scrofa mRNA, clone:OVR010015F05, expressed in ovary	1	0.888162

## Sheet: Landrace-profile 12(dpc)
GO_id	GO_name	genebank	Gene symbol	Gene Description	Pvalue	Enrichment
GO:0050901	leukocyte tethering or rolling	DN132989		996429 MARC 4PIG Sus scrofa cDNA 5', mRNA sequence	0.000252789	102.141
GO:0050901	leukocyte tethering or rolling	NM_213891.1	VCAM1	Sus scrofa vascular cell adhesion molecule (VCAM1), mRNA	0.000252789	102.141
GO:0045123	cellular extravasation	DN132989		996429 MARC 4PIG Sus scrofa cDNA 5', mRNA sequence	0.000503409	76.6054
GO:0045123	cellular extravasation	NM_213891.1	VCAM1	Sus scrofa vascular cell adhesion molecule (VCAM1), mRNA	0.000503409	76.6054
GO:0022614	membrane to membrane docking	DN132989		996429 MARC 4PIG Sus scrofa cDNA 5', mRNA sequence	0.000503409	76.6054
GO:0022614	membrane to membrane docking	NM_213891.1	VCAM1	Sus scrofa vascular cell adhesion molecule (VCAM1), mRNA	0.000503409	76.6054
GO:0022406	membrane docking	DN132989		996429 MARC 4PIG Sus scrofa cDNA 5', mRNA sequence	0.000835418	61.2844
GO:0022406	membrane docking	NM_213891.1	VCAM1	Sus scrofa vascular cell adhesion molecule (VCAM1), mRNA	0.000835418	61.2844
GO:0007159	leukocyte adhesion	DN132989		996429 MARC 4PIG Sus scrofa cDNA 5', mRNA sequence	0.00230924	38.3027
GO:0007159	leukocyte adhesion	NM_213891.1	VCAM1	Sus scrofa vascular cell adhesion molecule (VCAM1), mRNA	0.00230924	38.3027
GO:0050900	leukocyte migration	DN132989		996429 MARC 4PIG Sus scrofa cDNA 5', mRNA sequence	0.00230924	38.3027
GO:0050900	leukocyte migration	NM_213891.1	VCAM1	Sus scrofa vascular cell adhesion molecule (VCAM1), mRNA	0.00230924	38.3027
GO:0030100	regulation of endocytosis	AK234218.1		Sus scrofa mRNA, clone:OVR010028H07, expressed in ovary	0.00447805	27.8565
GO:0030100	regulation of endocytosis	BP144557		BP144557 full-length enriched swine cDNA library, adult ovary Sus scrofa cDNA clone OVR010019H05 5', mRNA sequence	0.00447805	27.8565
GO:0016042	lipid catabolic process	AK234218.1		Sus scrofa mRNA, clone:OVR010028H07, expressed in ovary	0.00484341	11.2106
GO:0016042	lipid catabolic process	AU296347		AU296347 full-length enriched pig cDNA library, main and accessory olfactory bulb Sus scrofa cDNA clone olf_091_A09 5', mRNA sequence	0.00484341	11.2106
GO:0016042	lipid catabolic process	BP144557		BP144557 full-length enriched swine cDNA library, adult ovary Sus scrofa cDNA clone OVR010019H05 5', mRNA sequence	0.00484341	11.2106
GO:0016477	cell migration	CJ009232		CJ009232 full-length enriched swine cDNA library, adult mesenteric lymph node Sus scrofa cDNA clone MLN01D050021 5', mRNA sequence	0.00673518	9.99201
GO:0016477	cell migration	DN132989		996429 MARC 4PIG Sus scrofa cDNA 5', mRNA sequence	0.00673518	9.99201
GO:0016477	cell migration	NM_213891.1	VCAM1	Sus scrofa vascular cell adhesion molecule (VCAM1), mRNA	0.00673518	9.99201
GO:0048870	cell motility	CJ009232		CJ009232 full-length enriched swine cDNA library, adult mesenteric lymph node Sus scrofa cDNA clone MLN01D050021 5', mRNA sequence	0.00716033	9.77942
GO:0048870	cell motility	DN132989		996429 MARC 4PIG Sus scrofa cDNA 5', mRNA sequence	0.00716033	9.77942
GO:0048870	cell motility	NM_213891.1	VCAM1	Sus scrofa vascular cell adhesion molecule (VCAM1), mRNA	0.00716033	9.77942
GO:0006928	cell motion	AK233462.1		Sus scrofa mRNA, clone:LVRM10152C10, expressed in liver	0.00902887	6.00827
GO:0006928	cell motion	CJ009232		CJ009232 full-length enriched swine cDNA library, adult mesenteric lymph node Sus scrofa cDNA clone MLN01D050021 5', mRNA sequence	0.00902887	6.00827
GO:0006928	cell motion	DN132989		996429 MARC 4PIG Sus scrofa cDNA 5', mRNA sequence	0.00902887	6.00827
GO:0006928	cell motion	NM_213891.1	VCAM1	Sus scrofa vascular cell adhesion molecule (VCAM1), mRNA	0.00902887	6.00827
GO:0051674	localization of cell	AK233462.1		Sus scrofa mRNA, clone:LVRM10152C10, expressed in liver	0.00902887	6.00827
GO:0051674	localization of cell	CJ009232		CJ009232 full-length enriched swine cDNA library, adult mesenteric lymph node Sus scrofa cDNA clone MLN01D050021 5', mRNA sequence	0.00902887	6.00827
GO:0051674	localization of cell	DN132989		996429 MARC 4PIG Sus scrofa cDNA 5', mRNA sequence	0.00902887	6.00827
GO:0051674	localization of cell	NM_213891.1	VCAM1	Sus scrofa vascular cell adhesion molecule (VCAM1), mRNA	0.00902887	6.00827
GO:0042159	lipoprotein catabolic process	BP144557		BP144557 full-length enriched swine cDNA library, adult ovary Sus scrofa cDNA clone OVR010019H05 5', mRNA sequence	0.0130539	153.211
GO:0048549	positive regulation of pinocytosis	BP144557		BP144557 full-length enriched swine cDNA library, adult ovary Sus scrofa cDNA clone OVR010019H05 5', mRNA sequence	0.0130539	153.211
GO:0048260	positive regulation of receptor-mediated endocytosis	BP144557		BP144557 full-length enriched swine cDNA library, adult ovary Sus scrofa cDNA clone OVR010019H05 5', mRNA sequence	0.0130539	153.211
GO:0002084	protein depalmitoylation	BP144557		BP144557 full-length enriched swine cDNA library, adult ovary Sus scrofa cDNA clone OVR010019H05 5', mRNA sequence	0.0130539	153.211
GO:0048548	regulation of pinocytosis	BP144557		BP144557 full-length enriched swine cDNA library, adult ovary Sus scrofa cDNA clone OVR010019H05 5', mRNA sequence	0.0130539	153.211
GO:0048259	regulation of receptor-mediated endocytosis	BP144557		BP144557 full-length enriched swine cDNA library, adult ovary Sus scrofa cDNA clone OVR010019H05 5', mRNA sequence	0.0130539	153.211
GO:0033344	cholesterol efflux	AK232649.1		Sus scrofa mRNA, clone:LVR010105F03, expressed in liver	0.0260232	76.6054
GO:0006012	galactose metabolic process	AY609808.1		Sus scrofa clone Clu_32103.scr.msk.p1.Contig2, mRNA sequence	0.0260232	76.6054
GO:0031579	membrane raft organization	BP144557		BP144557 full-length enriched swine cDNA library, adult ovary Sus scrofa cDNA clone OVR010019H05 5', mRNA sequence	0.0260232	76.6054
GO:0001560	regulation of cell growth by extracellular stimulus	BI186305		UNL-P-FN-cc-g-08-0-UNL.s2 UNL-P-FN Sus scrofa cDNA clone UNL-P-FN-cc-g-08-0-UNL 3', mRNA sequence	0.0260232	76.6054
GO:0001558	regulation of cell growth	AK234149.1		Sus scrofa mRNA, clone:OVR010012H06, expressed in ovary	0.0290188	5.89273
GO:0001558	regulation of cell growth	BI186305		UNL-P-FN-cc-g-08-0-UNL.s2 UNL-P-FN Sus scrofa cDNA clone UNL-P-FN-cc-g-08-0-UNL 3', mRNA sequence	0.0290188	5.89273
GO:0001558	regulation of cell growth	BP144557		BP144557 full-length enriched swine cDNA library, adult ovary Sus scrofa cDNA clone OVR010019H05 5', mRNA sequence	0.0290188	5.89273
GO:0051179	localization	AK232649.1		Sus scrofa mRNA, clone:LVR010105F03, expressed in liver	0.0358213	1.87169
GO:0051179	localization	AK233462.1		Sus scrofa mRNA, clone:LVRM10152C10, expressed in liver	0.0358213	1.87169
GO:0051179	localization	AK234218.1		Sus scrofa mRNA, clone:OVR010028H07, expressed in ovary	0.0358213	1.87169
GO:0051179	localization	AY609920.1		Sus scrofa clone Clu_44000.scr.msk.p1.Contig1, mRNA sequence	0.0358213	1.87169
GO:0051179	localization	BP144557		BP144557 full-length enriched swine cDNA library, adult ovary Sus scrofa cDNA clone OVR010019H05 5', mRNA sequence	0.0358213	1.87169
GO:0051179	localization	BW973179		BW973179 full-length enriched swine cDNA library, adult periphral blood mononuclear cell Sus scrofa cDNA clone PBL010079D03 5', mRNA sequence	0.0358213	1.87169
GO:0051179	localization	CJ009232		CJ009232 full-length enriched swine cDNA library, adult mesenteric lymph node Sus scrofa cDNA clone MLN01D050021 5', mRNA sequence	0.0358213	1.87169
GO:0051179	localization	CV873038		PDUts1109G12 Porcine testis cDNA library I Sus scrofa cDNA clone PDUts1109G12 5', mRNA sequence	0.0358213	1.87169
GO:0051179	localization	DN109213		1106782 MARC 4PIG Sus scrofa cDNA 5', mRNA sequence	0.0358213	1.87169
GO:0051179	localization	DN132989		996429 MARC 4PIG Sus scrofa cDNA 5', mRNA sequence	0.0358213	1.87169
GO:0051179	localization	DN134303		999500 MARC 4PIG Sus scrofa cDNA 5', mRNA sequence	0.0358213	1.87169
GO:0051179	localization	NM_213891.1	VCAM1	Sus scrofa vascular cell adhesion molecule (VCAM1), mRNA	0.0358213	1.87169
GO:0051179	localization	XM_001928732.1	ETFA	PREDICTED: Sus scrofa electron-transfer-flavoprotein, alpha polypeptide (glutaric aciduria II) (ETFA), mRNA	0.0358213	1.87169
GO:0051179	localization	XM_001929505.1	LOC100153098	PREDICTED: Sus scrofa similar to Solute carrier family 39 (zinc transporter), member 1 (LOC100153098), mRNA	0.0358213	1.87169
GO:0040008	regulation of growth	AK234149.1		Sus scrofa mRNA, clone:OVR010012H06, expressed in ovary	0.0364574	5.40744
GO:0040008	regulation of growth	BI186305		UNL-P-FN-cc-g-08-0-UNL.s2 UNL-P-FN Sus scrofa cDNA clone UNL-P-FN-cc-g-08-0-UNL 3', mRNA sequence	0.0364574	5.40744
GO:0040008	regulation of growth	BP144557		BP144557 full-length enriched swine cDNA library, adult ovary Sus scrofa cDNA clone OVR010019H05 5', mRNA sequence	0.0364574	5.40744
GO:0006707	cholesterol catabolic process	AK234218.1		Sus scrofa mRNA, clone:OVR010028H07, expressed in ovary	0.0389084	51.0703
GO:0009954	proximal/distal pattern formation	AK236542.1		Sus scrofa mRNA, clone:OVRM10201D11, expressed in ovary	0.0389084	51.0703
GO:0016127	sterol catabolic process	AK234218.1		Sus scrofa mRNA, clone:OVR010028H07, expressed in ovary	0.0389084	51.0703
GO:0007275	multicellular organismal development	AF281156.1	HOXD10A	Sus scrofa homeobox protein A10 mRNA, partial cds	0.0401346	2.12498
GO:0007275	multicellular organismal development	AK233462.1		Sus scrofa mRNA, clone:LVRM10152C10, expressed in liver	0.0401346	2.12498
GO:0007275	multicellular organismal development	AK236542.1		Sus scrofa mRNA, clone:OVRM10201D11, expressed in ovary	0.0401346	2.12498
GO:0007275	multicellular organismal development	AY610379.1		Sus scrofa clone rese11c_b12.y1.abd, mRNA sequence	0.0401346	2.12498
GO:0007275	multicellular organismal development	BP144557		BP144557 full-length enriched swine cDNA library, adult ovary Sus scrofa cDNA clone OVR010019H05 5', mRNA sequence	0.0401346	2.12498
GO:0007275	multicellular organismal development	BP438382		BP438382 full-length enriched swine cDNA library, adult lung Sus scrofa cDNA clone LNG010019F06 5', mRNA sequence	0.0401346	2.12498
GO:0007275	multicellular organismal development	CN165338		995752 MARC 4PIG Sus scrofa cDNA 5', mRNA sequence	0.0401346	2.12498
GO:0007275	multicellular organismal development	DN134303		999500 MARC 4PIG Sus scrofa cDNA 5', mRNA sequence	0.0401346	2.12498
GO:0007275	multicellular organismal development	NM_001037965.1	ID2	Sus scrofa inhibitor of DNA binding 2 (ID2), mRNA	0.0401346	2.12498
GO:0007275	multicellular organismal development	NM_213891.1	VCAM1	Sus scrofa vascular cell adhesion molecule (VCAM1), mRNA	0.0401346	2.12498
GO:0022610	biological adhesion	AK233462.1		Sus scrofa mRNA, clone:LVRM10152C10, expressed in liver	0.0415833	3.19189
GO:0022610	biological adhesion	CJ009232		CJ009232 full-length enriched swine cDNA library, adult mesenteric lymph node Sus scrofa cDNA clone MLN01D050021 5', mRNA sequence	0.0415833	3.19189
GO:0022610	biological adhesion	DN107911		1105390 MARC 4PIG Sus scrofa cDNA 5', mRNA sequence	0.0415833	3.19189
GO:0022610	biological adhesion	DN132989		996429 MARC 4PIG Sus scrofa cDNA 5', mRNA sequence	0.0415833	3.19189
GO:0022610	biological adhesion	NM_213891.1	VCAM1	Sus scrofa vascular cell adhesion molecule (VCAM1), mRNA	0.0415833	3.19189
GO:0007155	cell adhesion	AK233462.1		Sus scrofa mRNA, clone:LVRM10152C10, expressed in liver	0.0415833	3.19189
GO:0007155	cell adhesion	CJ009232		CJ009232 full-length enriched swine cDNA library, adult mesenteric lymph node Sus scrofa cDNA clone MLN01D050021 5', mRNA sequence	0.0415833	3.19189
GO:0007155	cell adhesion	DN107911		1105390 MARC 4PIG Sus scrofa cDNA 5', mRNA sequence	0.0415833	3.19189
GO:0007155	cell adhesion	DN132989		996429 MARC 4PIG Sus scrofa cDNA 5', mRNA sequence	0.0415833	3.19189
GO:0007155	cell adhesion	NM_213891.1	VCAM1	Sus scrofa vascular cell adhesion molecule (VCAM1), mRNA	0.0415833	3.19189
GO:0030308	negative regulation of cell growth	BI186305		UNL-P-FN-cc-g-08-0-UNL.s2 UNL-P-FN Sus scrofa cDNA clone UNL-P-FN-cc-g-08-0-UNL 3', mRNA sequence	0.048547	8.28167
GO:0030308	negative regulation of cell growth	BP144557		BP144557 full-length enriched swine cDNA library, adult ovary Sus scrofa cDNA clone OVR010019H05 5', mRNA sequence	0.048547	8.28167
GO:0045792	negative regulation of cell size	BI186305		UNL-P-FN-cc-g-08-0-UNL.s2 UNL-P-FN Sus scrofa cDNA clone UNL-P-FN-cc-g-08-0-UNL 3', mRNA sequence	0.048547	8.28167
GO:0045792	negative regulation of cell size	BP144557		BP144557 full-length enriched swine cDNA library, adult ovary Sus scrofa cDNA clone OVR010019H05 5', mRNA sequence	0.048547	8.28167
GO:0040011	locomotion	CJ009232		CJ009232 full-length enriched swine cDNA library, adult mesenteric lymph node Sus scrofa cDNA clone MLN01D050021 5', mRNA sequence	0.0500925	4.78784
GO:0040011	locomotion	DN132989		996429 MARC 4PIG Sus scrofa cDNA 5', mRNA sequence	0.0500925	4.78784
GO:0040011	locomotion	NM_213891.1	VCAM1	Sus scrofa vascular cell adhesion molecule (VCAM1), mRNA	0.0500925	4.78784
GO:0006525	arginine metabolic process	XM_001928679.1	LOC100155893	PREDICTED: Sus scrofa similar to arginase, type II (LOC100155893), mRNA	0.05171	38.3027
GO:0051452	intracellular pH reduction	BP144557		BP144557 full-length enriched swine cDNA library, adult ovary Sus scrofa cDNA clone OVR010019H05 5', mRNA sequence	0.05171	38.3027
GO:0007042	lysosomal lumen acidification	BP144557		BP144557 full-length enriched swine cDNA library, adult ovary Sus scrofa cDNA clone OVR010019H05 5', mRNA sequence	0.05171	38.3027
GO:0045851	pH reduction	BP144557		BP144557 full-length enriched swine cDNA library, adult ovary Sus scrofa cDNA clone OVR010019H05 5', mRNA sequence	0.05171	38.3027
GO:0051453	regulation of intracellular pH	BP144557		BP144557 full-length enriched swine cDNA library, adult ovary Sus scrofa cDNA clone OVR010019H05 5', mRNA sequence	0.05171	38.3027
GO:0045926	negative regulation of growth	BI186305		UNL-P-FN-cc-g-08-0-UNL.s2 UNL-P-FN Sus scrofa cDNA clone UNL-P-FN-cc-g-08-0-UNL 3', mRNA sequence	0.0535597	7.85697
GO:0045926	negative regulation of growth	BP144557		BP144557 full-length enriched swine cDNA library, adult ovary Sus scrofa cDNA clone OVR010019H05 5', mRNA sequence	0.0535597	7.85697
GO:0043603	cellular amide metabolic process	XM_001928679.1	LOC100155893	PREDICTED: Sus scrofa similar to arginase, type II (LOC100155893), mRNA	0.0644287	30.6422
GO:0051181	cofactor transport	BP144557		BP144557 full-length enriched swine cDNA library, adult ovary Sus scrofa cDNA clone OVR010019H05 5', mRNA sequence	0.0644287	30.6422
GO:0006309	DNA fragmentation during apoptosis	BP144557		BP144557 full-length enriched swine cDNA library, adult ovary Sus scrofa cDNA clone OVR010019H05 5', mRNA sequence	0.0644287	30.6422
GO:0007157	heterophilic cell adhesion	NM_213891.1	VCAM1	Sus scrofa vascular cell adhesion molecule (VCAM1), mRNA	0.0644287	30.6422
GO:0045807	positive regulation of endocytosis	BP144557		BP144557 full-length enriched swine cDNA library, adult ovary Sus scrofa cDNA clone OVR010019H05 5', mRNA sequence	0.0644287	30.6422
GO:0031398	positive regulation of protein ubiquitination	NM_001113437.1	LRRK2	Sus scrofa leucine-rich repeat kinase 2 (LRRK2), mRNA	0.0644287	30.6422
GO:0007096	regulation of exit from mitosis	BI186305		UNL-P-FN-cc-g-08-0-UNL.s2 UNL-P-FN Sus scrofa cDNA clone UNL-P-FN-cc-g-08-0-UNL 3', mRNA sequence	0.0644287	30.6422
GO:0007585	respiratory gaseous exchange	CV873038		PDUts1109G12 Porcine testis cDNA library I Sus scrofa cDNA clone PDUts1109G12 5', mRNA sequence	0.0644287	30.6422
GO:0006706	steroid catabolic process	AK234218.1		Sus scrofa mRNA, clone:OVR010028H07, expressed in ovary	0.0644287	30.6422
GO:0000050	urea cycle	XM_001928679.1	LOC100155893	PREDICTED: Sus scrofa similar to arginase, type II (LOC100155893), mRNA	0.0644287	30.6422
GO:0019627	urea metabolic process	XM_001928679.1	LOC100155893	PREDICTED: Sus scrofa similar to arginase, type II (LOC100155893), mRNA	0.0644287	30.6422
GO:0019079	viral genome replication	XM_001927909.1	LOC100156871	PREDICTED: Sus scrofa similar to DEK oncogene, transcript variant 1 (LOC100156871), mRNA	0.0644287	30.6422
GO:0032501	multicellular organismal process	AF281156.1	HOXD10A	Sus scrofa homeobox protein A10 mRNA, partial cds	0.0737688	1.84794
GO:0032501	multicellular organismal process	AK233462.1		Sus scrofa mRNA, clone:LVRM10152C10, expressed in liver	0.0737688	1.84794
GO:0032501	multicellular organismal process	AK236542.1		Sus scrofa mRNA, clone:OVRM10201D11, expressed in ovary	0.0737688	1.84794
GO:0032501	multicellular organismal process	AY610379.1		Sus scrofa clone rese11c_b12.y1.abd, mRNA sequence	0.0737688	1.84794
GO:0032501	multicellular organismal process	BP144557		BP144557 full-length enriched swine cDNA library, adult ovary Sus scrofa cDNA clone OVR010019H05 5', mRNA sequence	0.0737688	1.84794
GO:0032501	multicellular organismal process	BP438382		BP438382 full-length enriched swine cDNA library, adult lung Sus scrofa cDNA clone LNG010019F06 5', mRNA sequence	0.0737688	1.84794
GO:0032501	multicellular organismal process	CN165338		995752 MARC 4PIG Sus scrofa cDNA 5', mRNA sequence	0.0737688	1.84794
GO:0032501	multicellular organismal process	CV873038		PDUts1109G12 Porcine testis cDNA library I Sus scrofa cDNA clone PDUts1109G12 5', mRNA sequence	0.0737688	1.84794
GO:0032501	multicellular organismal process	DN134303		999500 MARC 4PIG Sus scrofa cDNA 5', mRNA sequence	0.0737688	1.84794
GO:0032501	multicellular organismal process	NM_001037965.1	ID2	Sus scrofa inhibitor of DNA binding 2 (ID2), mRNA	0.0737688	1.84794
GO:0032501	multicellular organismal process	NM_213891.1	VCAM1	Sus scrofa vascular cell adhesion molecule (VCAM1), mRNA	0.0737688	1.84794
GO:0030301	cholesterol transport	AK232649.1		Sus scrofa mRNA, clone:LVR010105F03, expressed in liver	0.0770649	25.5351
GO:0008214	protein amino acid dealkylation	AK234332.1		Sus scrofa mRNA, clone:OVR010044D10, expressed in ovary	0.0770649	25.5351
GO:0006482	protein amino acid demethylation	AK234332.1		Sus scrofa mRNA, clone:OVR010044D10, expressed in ovary	0.0770649	25.5351
GO:0015918	sterol transport	AK232649.1		Sus scrofa mRNA, clone:LVR010105F03, expressed in liver	0.0770649	25.5351
GO:0007190	activation of adenylate cyclase activity	CV873038		PDUts1109G12 Porcine testis cDNA library I Sus scrofa cDNA clone PDUts1109G12 5', mRNA sequence	0.0896191	21.8873
GO:0006921	cell structure disassembly during apoptosis	BP144557		BP144557 full-length enriched swine cDNA library, adult ovary Sus scrofa cDNA clone OVR010019H05 5', mRNA sequence	0.0896191	21.8873
GO:0030201	heparan sulfate proteoglycan metabolic process	CK464479		935479 MARC 4PIG Sus scrofa cDNA 3', mRNA sequence	0.0896191	21.8873
GO:0031396	regulation of protein ubiquitination	NM_001113437.1	LRRK2	Sus scrofa leucine-rich repeat kinase 2 (LRRK2), mRNA	0.0896191	21.8873
GO:0018149	peptide cross-linking	CJ009232		CJ009232 full-length enriched swine cDNA library, adult mesenteric lymph node Sus scrofa cDNA clone MLN01D050021 5', mRNA sequence	0.102092	19.1514
GO:0008361	regulation of cell size	BI186305		UNL-P-FN-cc-g-08-0-UNL.s2 UNL-P-FN Sus scrofa cDNA clone UNL-P-FN-cc-g-08-0-UNL 3', mRNA sequence	0.103639	5.47182
GO:0008361	regulation of cell size	BP144557		BP144557 full-length enriched swine cDNA library, adult ovary Sus scrofa cDNA clone OVR010019H05 5', mRNA sequence	0.103639	5.47182
GO:0022900	electron transport chain	BW973179		BW973179 full-length enriched swine cDNA library, adult periphral blood mononuclear cell Sus scrofa cDNA clone PBL010079D03 5', mRNA sequence	0.110317	5.28313
GO:0022900	electron transport chain	XM_001928732.1	ETFA	PREDICTED: Sus scrofa electron-transfer-flavoprotein, alpha polypeptide (glutaric aciduria II) (ETFA), mRNA	0.110317	5.28313
GO:0030262	apoptotic nuclear changes	BP144557		BP144557 full-length enriched swine cDNA library, adult ovary Sus scrofa cDNA clone OVR010019H05 5', mRNA sequence	0.114484	17.0234
GO:0030004	cellular monovalent inorganic cation homeostasis	BP144557		BP144557 full-length enriched swine cDNA library, adult ovary Sus scrofa cDNA clone OVR010019H05 5', mRNA sequence	0.114484	17.0234
GO:0015758	glucose transport	CV873038		PDUts1109G12 Porcine testis cDNA library I Sus scrofa cDNA clone PDUts1109G12 5', mRNA sequence	0.114484	17.0234
GO:0008645	hexose transport	CV873038		PDUts1109G12 Porcine testis cDNA library I Sus scrofa cDNA clone PDUts1109G12 5', mRNA sequence	0.114484	17.0234
GO:0007040	lysosome organization	BP144557		BP144557 full-length enriched swine cDNA library, adult ovary Sus scrofa cDNA clone OVR010019H05 5', mRNA sequence	0.114484	17.0234
GO:0015749	monosaccharide transport	CV873038		PDUts1109G12 Porcine testis cDNA library I Sus scrofa cDNA clone PDUts1109G12 5', mRNA sequence	0.114484	17.0234
GO:0055067	monovalent inorganic cation homeostasis	BP144557		BP144557 full-length enriched swine cDNA library, adult ovary Sus scrofa cDNA clone OVR010019H05 5', mRNA sequence	0.114484	17.0234
GO:0045762	positive regulation of adenylate cyclase activity	CV873038		PDUts1109G12 Porcine testis cDNA library I Sus scrofa cDNA clone PDUts1109G12 5', mRNA sequence	0.114484	17.0234
GO:0031281	positive regulation of cyclase activity	CV873038		PDUts1109G12 Porcine testis cDNA library I Sus scrofa cDNA clone PDUts1109G12 5', mRNA sequence	0.114484	17.0234
GO:0051349	positive regulation of lyase activity	CV873038		PDUts1109G12 Porcine testis cDNA library I Sus scrofa cDNA clone PDUts1109G12 5', mRNA sequence	0.114484	17.0234
GO:0030641	regulation of cellular pH	BP144557		BP144557 full-length enriched swine cDNA library, adult ovary Sus scrofa cDNA clone OVR010019H05 5', mRNA sequence	0.114484	17.0234
GO:0006885	regulation of pH	BP144557		BP144557 full-length enriched swine cDNA library, adult ovary Sus scrofa cDNA clone OVR010019H05 5', mRNA sequence	0.114484	17.0234
GO:0035113	embryonic appendage morphogenesis	AK236542.1		Sus scrofa mRNA, clone:OVRM10201D11, expressed in ovary	0.126796	15.3211
GO:0030326	embryonic limb morphogenesis	AK236542.1		Sus scrofa mRNA, clone:OVRM10201D11, expressed in ovary	0.126796	15.3211
GO:0006029	proteoglycan metabolic process	CK464479		935479 MARC 4PIG Sus scrofa cDNA 3', mRNA sequence	0.126796	15.3211
GO:0007033	vacuole organization	BP144557		BP144557 full-length enriched swine cDNA library, adult ovary Sus scrofa cDNA clone OVR010019H05 5', mRNA sequence	0.126796	15.3211
GO:0016337	cell-cell adhesion	DN132989		996429 MARC 4PIG Sus scrofa cDNA 5', mRNA sequence	0.138458	4.64275
GO:0016337	cell-cell adhesion	NM_213891.1	VCAM1	Sus scrofa vascular cell adhesion molecule (VCAM1), mRNA	0.138458	4.64275
GO:0035107	appendage morphogenesis	AK236542.1		Sus scrofa mRNA, clone:OVRM10201D11, expressed in ovary	0.139027	13.9283
GO:0009064	glutamine family amino acid metabolic process	XM_001928679.1	LOC100155893	PREDICTED: Sus scrofa similar to arginase, type II (LOC100155893), mRNA	0.139027	13.9283
GO:0035108	limb morphogenesis	AK236542.1		Sus scrofa mRNA, clone:OVRM10201D11, expressed in ovary	0.139027	13.9283
GO:0045005	maintenance of fidelity during DNA-dependent DNA replication	AK239557.1		Sus scrofa mRNA, clone:THY010112D06, expressed in thymus	0.139027	13.9283
GO:0006298	mismatch repair	AK239557.1		Sus scrofa mRNA, clone:THY010112D06, expressed in thymus	0.139027	13.9283
GO:0043524	negative regulation of neuron apoptosis	BP144557		BP144557 full-length enriched swine cDNA library, adult ovary Sus scrofa cDNA clone OVR010019H05 5', mRNA sequence	0.139027	13.9283
GO:0051049	regulation of transport	AK234218.1		Sus scrofa mRNA, clone:OVR010028H07, expressed in ovary	0.142126	4.57346
GO:0051049	regulation of transport	BP144557		BP144557 full-length enriched swine cDNA library, adult ovary Sus scrofa cDNA clone OVR010019H05 5', mRNA sequence	0.142126	4.57346
GO:0042102	positive regulation of T cell proliferation	NM_213891.1	VCAM1	Sus scrofa vascular cell adhesion molecule (VCAM1), mRNA	0.15118	12.7676
GO:0019058	viral infectious cycle	XM_001927909.1	LOC100156871	PREDICTED: Sus scrofa similar to DEK oncogene, transcript variant 1 (LOC100156871), mRNA	0.15118	12.7676
GO:0007399	nervous system development	AK233462.1		Sus scrofa mRNA, clone:LVRM10152C10, expressed in liver	0.161221	2.46122
GO:0007399	nervous system development	BP144557		BP144557 full-length enriched swine cDNA library, adult ovary Sus scrofa cDNA clone OVR010019H05 5', mRNA sequence	0.161221	2.46122
GO:0007399	nervous system development	BP438382		BP438382 full-length enriched swine cDNA library, adult lung Sus scrofa cDNA clone LNG010019F06 5', mRNA sequence	0.161221	2.46122
GO:0007399	nervous system development	DN134303		999500 MARC 4PIG Sus scrofa cDNA 5', mRNA sequence	0.161221	2.46122
GO:0050671	positive regulation of lymphocyte proliferation	NM_213891.1	VCAM1	Sus scrofa vascular cell adhesion molecule (VCAM1), mRNA	0.163253	11.7855
GO:0032946	positive regulation of mononuclear cell proliferation	NM_213891.1	VCAM1	Sus scrofa vascular cell adhesion molecule (VCAM1), mRNA	0.163253	11.7855
GO:0045761	regulation of adenylate cyclase activity	CV873038		PDUts1109G12 Porcine testis cDNA library I Sus scrofa cDNA clone PDUts1109G12 5', mRNA sequence	0.163253	11.7855
GO:0031279	regulation of cyclase activity	CV873038		PDUts1109G12 Porcine testis cDNA library I Sus scrofa cDNA clone PDUts1109G12 5', mRNA sequence	0.163253	11.7855
GO:0051339	regulation of lyase activity	CV873038		PDUts1109G12 Porcine testis cDNA library I Sus scrofa cDNA clone PDUts1109G12 5', mRNA sequence	0.163253	11.7855
GO:0006464	protein modification process	AK234332.1		Sus scrofa mRNA, clone:OVR010044D10, expressed in ovary	0.164132	1.99407
GO:0006464	protein modification process	BP144557		BP144557 full-length enriched swine cDNA library, adult ovary Sus scrofa cDNA clone OVR010019H05 5', mRNA sequence	0.164132	1.99407
GO:0006464	protein modification process	CJ009232		CJ009232 full-length enriched swine cDNA library, adult mesenteric lymph node Sus scrofa cDNA clone MLN01D050021 5', mRNA sequence	0.164132	1.99407
GO:0006464	protein modification process	DN109213		1106782 MARC 4PIG Sus scrofa cDNA 5', mRNA sequence	0.164132	1.99407
GO:0006464	protein modification process	DN132989		996429 MARC 4PIG Sus scrofa cDNA 5', mRNA sequence	0.164132	1.99407
GO:0006464	protein modification process	NM_001113437.1	LRRK2	Sus scrofa leucine-rich repeat kinase 2 (LRRK2), mRNA	0.164132	1.99407
GO:0044262	cellular carbohydrate metabolic process	AY609808.1		Sus scrofa clone Clu_32103.scr.msk.p1.Contig2, mRNA sequence	0.168655	4.14083
GO:0044262	cellular carbohydrate metabolic process	CK464479		935479 MARC 4PIG Sus scrofa cDNA 3', mRNA sequence	0.168655	4.14083
GO:0008380	RNA splicing	BI186305		UNL-P-FN-cc-g-08-0-UNL.s2 UNL-P-FN Sus scrofa cDNA clone UNL-P-FN-cc-g-08-0-UNL 3', mRNA sequence	0.169772	2.90907
GO:0008380	RNA splicing	BX669885		BX669885 Sus Scrofa library (scac) Sus scrofa cDNA clone scac0030.p.08 5prim, mRNA sequence	0.169772	2.90907
GO:0008380	RNA splicing	CV877363		PDUts1163F04 Porcine testis cDNA library I Sus scrofa cDNA clone PDUts1163F04 5' similar to homologue to ref|NM_014003.3| Homo sapiens DEAH (Asp-Glu-Ala-His) box polypeptide 38 (DHX38), mRNA, mRNA sequence	0.169772	2.90907
GO:0022411	cellular component disassembly	BP144557		BP144557 full-length enriched swine cDNA library, adult ovary Sus scrofa cDNA clone OVR010019H05 5', mRNA sequence	0.175249	10.9436
GO:0007266	Rho protein signal transduction	DN132989		996429 MARC 4PIG Sus scrofa cDNA 5', mRNA sequence	0.175249	10.9436
GO:0043412	biopolymer modification	AK234332.1		Sus scrofa mRNA, clone:OVR010044D10, expressed in ovary	0.183024	1.9353
GO:0043412	biopolymer modification	BP144557		BP144557 full-length enriched swine cDNA library, adult ovary Sus scrofa cDNA clone OVR010019H05 5', mRNA sequence	0.183024	1.9353
GO:0043412	biopolymer modification	CJ009232		CJ009232 full-length enriched swine cDNA library, adult mesenteric lymph node Sus scrofa cDNA clone MLN01D050021 5', mRNA sequence	0.183024	1.9353
GO:0043412	biopolymer modification	DN109213		1106782 MARC 4PIG Sus scrofa cDNA 5', mRNA sequence	0.183024	1.9353
GO:0043412	biopolymer modification	DN132989		996429 MARC 4PIG Sus scrofa cDNA 5', mRNA sequence	0.183024	1.9353
GO:0043412	biopolymer modification	NM_001113437.1	LRRK2	Sus scrofa leucine-rich repeat kinase 2 (LRRK2), mRNA	0.183024	1.9353
GO:0048736	appendage development	AK236542.1		Sus scrofa mRNA, clone:OVRM10201D11, expressed in ovary	0.187166	10.2141
GO:0031668	cellular response to extracellular stimulus	BI186305		UNL-P-FN-cc-g-08-0-UNL.s2 UNL-P-FN Sus scrofa cDNA clone UNL-P-FN-cc-g-08-0-UNL 3', mRNA sequence	0.187166	10.2141
GO:0060173	limb development	AK236542.1		Sus scrofa mRNA, clone:OVRM10201D11, expressed in ovary	0.187166	10.2141
GO:0050821	protein stabilization	AK232649.1		Sus scrofa mRNA, clone:LVR010105F03, expressed in liver	0.187166	10.2141
GO:0043523	regulation of neuron apoptosis	BP144557		BP144557 full-length enriched swine cDNA library, adult ovary Sus scrofa cDNA clone OVR010019H05 5', mRNA sequence	0.187166	10.2141
GO:0043687	post-translational protein modification	AK234332.1		Sus scrofa mRNA, clone:OVR010044D10, expressed in ovary	0.190852	2.07042
GO:0043687	post-translational protein modification	CJ009232		CJ009232 full-length enriched swine cDNA library, adult mesenteric lymph node Sus scrofa cDNA clone MLN01D050021 5', mRNA sequence	0.190852	2.07042
GO:0043687	post-translational protein modification	DN109213		1106782 MARC 4PIG Sus scrofa cDNA 5', mRNA sequence	0.190852	2.07042
GO:0043687	post-translational protein modification	DN132989		996429 MARC 4PIG Sus scrofa cDNA 5', mRNA sequence	0.190852	2.07042
GO:0043687	post-translational protein modification	NM_001113437.1	LRRK2	Sus scrofa leucine-rich repeat kinase 2 (LRRK2), mRNA	0.190852	2.07042
GO:0042129	regulation of T cell proliferation	NM_213891.1	VCAM1	Sus scrofa vascular cell adhesion molecule (VCAM1), mRNA	0.199006	9.57568
GO:0044242	cellular lipid catabolic process	AK234218.1		Sus scrofa mRNA, clone:OVR010028H07, expressed in ovary	0.21077	9.0124
GO:0050670	regulation of lymphocyte proliferation	NM_213891.1	VCAM1	Sus scrofa vascular cell adhesion molecule (VCAM1), mRNA	0.21077	9.0124
GO:0032944	regulation of mononuclear cell proliferation	NM_213891.1	VCAM1	Sus scrofa vascular cell adhesion molecule (VCAM1), mRNA	0.21077	9.0124
GO:0022415	viral reproductive process	XM_001927909.1	LOC100156871	PREDICTED: Sus scrofa similar to DEK oncogene, transcript variant 1 (LOC100156871), mRNA	0.21077	9.0124
GO:0030183	B cell differentiation	NM_213891.1	VCAM1	Sus scrofa vascular cell adhesion molecule (VCAM1), mRNA	0.222457	8.51172
GO:0031401	positive regulation of protein modification process	NM_001113437.1	LRRK2	Sus scrofa leucine-rich repeat kinase 2 (LRRK2), mRNA	0.222457	8.51172
GO:0007088	regulation of mitosis	BI186305		UNL-P-FN-cc-g-08-0-UNL.s2 UNL-P-FN Sus scrofa cDNA clone UNL-P-FN-cc-g-08-0-UNL 3', mRNA sequence	0.222457	8.51172
GO:0031647	regulation of protein stability	AK232649.1		Sus scrofa mRNA, clone:LVR010105F03, expressed in liver	0.222457	8.51172
GO:0016032	viral reproduction	XM_001927909.1	LOC100156871	PREDICTED: Sus scrofa similar to DEK oncogene, transcript variant 1 (LOC100156871), mRNA	0.222457	8.51172
GO:0016043	cellular component organization	AK233462.1		Sus scrofa mRNA, clone:LVRM10152C10, expressed in liver	0.226277	0.393858
GO:0016043	cellular component organization	BP144557		BP144557 full-length enriched swine cDNA library, adult ovary Sus scrofa cDNA clone OVR010019H05 5', mRNA sequence	0.226277	0.393858
GO:0051130	positive regulation of cellular component organization	BP144557		BP144557 full-length enriched swine cDNA library, adult ovary Sus scrofa cDNA clone OVR010019H05 5', mRNA sequence	0.234068	8.06373
GO:0051050	positive regulation of transport	BP144557		BP144557 full-length enriched swine cDNA library, adult ovary Sus scrofa cDNA clone OVR010019H05 5', mRNA sequence	0.234068	8.06373
GO:0032502	developmental process	AF281156.1	HOXD10A	Sus scrofa homeobox protein A10 mRNA, partial cds	0.235311	1.53672
GO:0032502	developmental process	AK233462.1		Sus scrofa mRNA, clone:LVRM10152C10, expressed in liver	0.235311	1.53672
GO:0032502	developmental process	AK236542.1		Sus scrofa mRNA, clone:OVRM10201D11, expressed in ovary	0.235311	1.53672
GO:0032502	developmental process	AY610379.1		Sus scrofa clone rese11c_b12.y1.abd, mRNA sequence	0.235311	1.53672
GO:0032502	developmental process	BP144557		BP144557 full-length enriched swine cDNA library, adult ovary Sus scrofa cDNA clone OVR010019H05 5', mRNA sequence	0.235311	1.53672
GO:0032502	developmental process	BP438382		BP438382 full-length enriched swine cDNA library, adult lung Sus scrofa cDNA clone LNG010019F06 5', mRNA sequence	0.235311	1.53672
GO:0032502	developmental process	CN165338		995752 MARC 4PIG Sus scrofa cDNA 5', mRNA sequence	0.235311	1.53672
GO:0032502	developmental process	DN134303		999500 MARC 4PIG Sus scrofa cDNA 5', mRNA sequence	0.235311	1.53672
GO:0032502	developmental process	NM_001037965.1	ID2	Sus scrofa inhibitor of DNA binding 2 (ID2), mRNA	0.235311	1.53672
GO:0032502	developmental process	NM_213891.1	VCAM1	Sus scrofa vascular cell adhesion molecule (VCAM1), mRNA	0.235311	1.53672
GO:0006810	transport	AK232649.1		Sus scrofa mRNA, clone:LVR010105F03, expressed in liver	0.244315	1.52449
GO:0006810	transport	AK234218.1		Sus scrofa mRNA, clone:OVR010028H07, expressed in ovary	0.244315	1.52449
GO:0006810	transport	AY609920.1		Sus scrofa clone Clu_44000.scr.msk.p1.Contig1, mRNA sequence	0.244315	1.52449
GO:0006810	transport	BP144557		BP144557 full-length enriched swine cDNA library, adult ovary Sus scrofa cDNA clone OVR010019H05 5', mRNA sequence	0.244315	1.52449
GO:0006810	transport	BW973179		BW973179 full-length enriched swine cDNA library, adult periphral blood mononuclear cell Sus scrofa cDNA clone PBL010079D03 5', mRNA sequence	0.244315	1.52449
GO:0006810	transport	CV873038		PDUts1109G12 Porcine testis cDNA library I Sus scrofa cDNA clone PDUts1109G12 5', mRNA sequence	0.244315	1.52449
GO:0006810	transport	DN109213		1106782 MARC 4PIG Sus scrofa cDNA 5', mRNA sequence	0.244315	1.52449
GO:0006810	transport	DN134303		999500 MARC 4PIG Sus scrofa cDNA 5', mRNA sequence	0.244315	1.52449
GO:0006810	transport	XM_001928732.1	ETFA	PREDICTED: Sus scrofa electron-transfer-flavoprotein, alpha polypeptide (glutaric aciduria II) (ETFA), mRNA	0.244315	1.52449
GO:0006810	transport	XM_001929505.1	LOC100153098	PREDICTED: Sus scrofa similar to Solute carrier family 39 (zinc transporter), member 1 (LOC100153098), mRNA	0.244315	1.52449
GO:0050870	positive regulation of T cell activation	NM_213891.1	VCAM1	Sus scrofa vascular cell adhesion molecule (VCAM1), mRNA	0.245604	7.66054
GO:0006091	generation of precursor metabolites and energy	BW973179		BW973179 full-length enriched swine cDNA library, adult periphral blood mononuclear cell Sus scrofa cDNA clone PBL010079D03 5', mRNA sequence	0.255718	3.22549
GO:0006091	generation of precursor metabolites and energy	XM_001928732.1	ETFA	PREDICTED: Sus scrofa electron-transfer-flavoprotein, alpha polypeptide (glutaric aciduria II) (ETFA), mRNA	0.255718	3.22549
GO:0006308	DNA catabolic process	BP144557		BP144557 full-length enriched swine cDNA library, adult ovary Sus scrofa cDNA clone OVR010019H05 5', mRNA sequence	0.257065	7.29576
GO:0051234	establishment of localization	AK232649.1		Sus scrofa mRNA, clone:LVR010105F03, expressed in liver	0.25935	1.50502
GO:0051234	establishment of localization	AK234218.1		Sus scrofa mRNA, clone:OVR010028H07, expressed in ovary	0.25935	1.50502
GO:0051234	establishment of localization	AY609920.1		Sus scrofa clone Clu_44000.scr.msk.p1.Contig1, mRNA sequence	0.25935	1.50502
GO:0051234	establishment of localization	BP144557		BP144557 full-length enriched swine cDNA library, adult ovary Sus scrofa cDNA clone OVR010019H05 5', mRNA sequence	0.25935	1.50502
GO:0051234	establishment of localization	BW973179		BW973179 full-length enriched swine cDNA library, adult periphral blood mononuclear cell Sus scrofa cDNA clone PBL010079D03 5', mRNA sequence	0.25935	1.50502
GO:0051234	establishment of localization	CV873038		PDUts1109G12 Porcine testis cDNA library I Sus scrofa cDNA clone PDUts1109G12 5', mRNA sequence	0.25935	1.50502
GO:0051234	establishment of localization	DN109213		1106782 MARC 4PIG Sus scrofa cDNA 5', mRNA sequence	0.25935	1.50502
GO:0051234	establishment of localization	DN134303		999500 MARC 4PIG Sus scrofa cDNA 5', mRNA sequence	0.25935	1.50502
GO:0051234	establishment of localization	XM_001928732.1	ETFA	PREDICTED: Sus scrofa electron-transfer-flavoprotein, alpha polypeptide (glutaric aciduria II) (ETFA), mRNA	0.25935	1.50502
GO:0051234	establishment of localization	XM_001929505.1	LOC100153098	PREDICTED: Sus scrofa similar to Solute carrier family 39 (zinc transporter), member 1 (LOC100153098), mRNA	0.25935	1.50502
GO:0051251	positive regulation of lymphocyte activation	NM_213891.1	VCAM1	Sus scrofa vascular cell adhesion molecule (VCAM1), mRNA	0.268451	6.96413
GO:0009991	response to extracellular stimulus	BI186305		UNL-P-FN-cc-g-08-0-UNL.s2 UNL-P-FN Sus scrofa cDNA clone UNL-P-FN-cc-g-08-0-UNL 3', mRNA sequence	0.268451	6.96413
GO:0006829	zinc ion transport	XM_001929505.1	LOC100153098	PREDICTED: Sus scrofa similar to Solute carrier family 39 (zinc transporter), member 1 (LOC100153098), mRNA	0.268451	6.96413
GO:0048731	system development	AK233462.1		Sus scrofa mRNA, clone:LVRM10152C10, expressed in liver	0.269676	1.7312
GO:0048731	system development	AK236542.1		Sus scrofa mRNA, clone:OVRM10201D11, expressed in ovary	0.269676	1.7312
GO:0048731	system development	BP144557		BP144557 full-length enriched swine cDNA library, adult ovary Sus scrofa cDNA clone OVR010019H05 5', mRNA sequence	0.269676	1.7312
GO:0048731	system development	BP438382		BP438382 full-length enriched swine cDNA library, adult lung Sus scrofa cDNA clone LNG010019F06 5', mRNA sequence	0.269676	1.7312
GO:0048731	system development	DN134303		999500 MARC 4PIG Sus scrofa cDNA 5', mRNA sequence	0.269676	1.7312
GO:0048731	system development	NM_213891.1	VCAM1	Sus scrofa vascular cell adhesion molecule (VCAM1), mRNA	0.269676	1.7312
GO:0006261	DNA-dependent DNA replication	AK239557.1		Sus scrofa mRNA, clone:THY010112D06, expressed in thymus	0.279764	6.66134
GO:0009790	embryonic development	AK236542.1		Sus scrofa mRNA, clone:OVRM10201D11, expressed in ovary	0.286696	3.00413
GO:0009790	embryonic development	AY610379.1		Sus scrofa clone rese11c_b12.y1.abd, mRNA sequence	0.286696	3.00413
GO:0051252	regulation of RNA metabolic process	BX672987		BX672987 Sus Scrofa library (scac) Sus scrofa cDNA clone scac0037.a.01 5prim, mRNA sequence	0.290308	0.42382
GO:0051252	regulation of RNA metabolic process	XM_001927909.1	LOC100156871	PREDICTED: Sus scrofa similar to DEK oncogene, transcript variant 1 (LOC100156871), mRNA	0.290308	0.42382
GO:0006997	nucleus organization	BP144557		BP144557 full-length enriched swine cDNA library, adult ovary Sus scrofa cDNA clone OVR010019H05 5', mRNA sequence	0.291004	6.38379
GO:0050867	positive regulation of cell activation	NM_213891.1	VCAM1	Sus scrofa vascular cell adhesion molecule (VCAM1), mRNA	0.291004	6.38379
GO:0002696	positive regulation of leukocyte activation	NM_213891.1	VCAM1	Sus scrofa vascular cell adhesion molecule (VCAM1), mRNA	0.291004	6.38379
GO:0009889	regulation of biosynthetic process	AY610379.1		Sus scrofa clone rese11c_b12.y1.abd, mRNA sequence	0.294611	0.502331
GO:0009889	regulation of biosynthetic process	BX672987		BX672987 Sus Scrofa library (scac) Sus scrofa cDNA clone scac0037.a.01 5prim, mRNA sequence	0.294611	0.502331
GO:0009889	regulation of biosynthetic process	XM_001927909.1	LOC100156871	PREDICTED: Sus scrofa similar to DEK oncogene, transcript variant 1 (LOC100156871), mRNA	0.294611	0.502331
GO:0031326	regulation of cellular biosynthetic process	AY610379.1		Sus scrofa clone rese11c_b12.y1.abd, mRNA sequence	0.294611	0.502331
GO:0031326	regulation of cellular biosynthetic process	BX672987		BX672987 Sus Scrofa library (scac) Sus scrofa cDNA clone scac0037.a.01 5prim, mRNA sequence	0.294611	0.502331
GO:0031326	regulation of cellular biosynthetic process	XM_001927909.1	LOC100156871	PREDICTED: Sus scrofa similar to DEK oncogene, transcript variant 1 (LOC100156871), mRNA	0.294611	0.502331
GO:0007411	axon guidance	AK233462.1		Sus scrofa mRNA, clone:LVRM10152C10, expressed in liver	0.30217	6.12844
GO:0010564	regulation of cell cycle process	BI186305		UNL-P-FN-cc-g-08-0-UNL.s2 UNL-P-FN Sus scrofa cDNA clone UNL-P-FN-cc-g-08-0-UNL 3', mRNA sequence	0.30217	6.12844
GO:0010556	regulation of macromolecule biosynthetic process	AY610379.1		Sus scrofa clone rese11c_b12.y1.abd, mRNA sequence	0.302963	0.506203
GO:0010556	regulation of macromolecule biosynthetic process	BX672987		BX672987 Sus Scrofa library (scac) Sus scrofa cDNA clone scac0037.a.01 5prim, mRNA sequence	0.302963	0.506203
GO:0010556	regulation of macromolecule biosynthetic process	XM_001927909.1	LOC100156871	PREDICTED: Sus scrofa similar to DEK oncogene, transcript variant 1 (LOC100156871), mRNA	0.302963	0.506203
GO:0006066	cellular alcohol metabolic process	AK234218.1		Sus scrofa mRNA, clone:OVR010028H07, expressed in ovary	0.304738	2.89077
GO:0006066	cellular alcohol metabolic process	AY609808.1		Sus scrofa clone Clu_32103.scr.msk.p1.Contig2, mRNA sequence	0.304738	2.89077
GO:0006355	regulation of transcription, DNA-dependent	BX672987		BX672987 Sus Scrofa library (scac) Sus scrofa cDNA clone scac0037.a.01 5prim, mRNA sequence	0.306207	0.430973
GO:0006355	regulation of transcription, DNA-dependent	XM_001927909.1	LOC100156871	PREDICTED: Sus scrofa similar to DEK oncogene, transcript variant 1 (LOC100156871), mRNA	0.306207	0.430973
GO:0006468	protein amino acid phosphorylation	DN109213		1106782 MARC 4PIG Sus scrofa cDNA 5', mRNA sequence	0.316498	2.18873
GO:0006468	protein amino acid phosphorylation	DN132989		996429 MARC 4PIG Sus scrofa cDNA 5', mRNA sequence	0.316498	2.18873
GO:0006468	protein amino acid phosphorylation	NM_001113437.1	LRRK2	Sus scrofa leucine-rich repeat kinase 2 (LRRK2), mRNA	0.316498	2.18873
GO:0051128	regulation of cellular component organization	AK234218.1		Sus scrofa mRNA, clone:OVR010028H07, expressed in ovary	0.318413	2.81121
GO:0051128	regulation of cellular component organization	BP144557		BP144557 full-length enriched swine cDNA library, adult ovary Sus scrofa cDNA clone OVR010019H05 5', mRNA sequence	0.318413	2.81121
GO:0050863	regulation of T cell activation	NM_213891.1	VCAM1	Sus scrofa vascular cell adhesion molecule (VCAM1), mRNA	0.324286	5.67448
GO:0032879	regulation of localization	AK234218.1		Sus scrofa mRNA, clone:OVR010028H07, expressed in ovary	0.34145	2.68791
GO:0032879	regulation of localization	BP144557		BP144557 full-length enriched swine cDNA library, adult ovary Sus scrofa cDNA clone OVR010019H05 5', mRNA sequence	0.34145	2.68791
GO:0051249	regulation of lymphocyte activation	NM_213891.1	VCAM1	Sus scrofa vascular cell adhesion molecule (VCAM1), mRNA	0.346116	5.28313
GO:0042113	B cell activation	NM_213891.1	VCAM1	Sus scrofa vascular cell adhesion molecule (VCAM1), mRNA	0.356924	5.10703
GO:0008643	carbohydrate transport	CV873038		PDUts1109G12 Porcine testis cDNA library I Sus scrofa cDNA clone PDUts1109G12 5', mRNA sequence	0.356924	5.10703
GO:0030098	lymphocyte differentiation	NM_213891.1	VCAM1	Sus scrofa vascular cell adhesion molecule (VCAM1), mRNA	0.356924	5.10703
GO:0046777	protein amino acid autophosphorylation	NM_001113437.1	LRRK2	Sus scrofa leucine-rich repeat kinase 2 (LRRK2), mRNA	0.356924	5.10703
GO:0016540	protein autoprocessing	NM_001113437.1	LRRK2	Sus scrofa leucine-rich repeat kinase 2 (LRRK2), mRNA	0.356924	5.10703
GO:0002521	leukocyte differentiation	NM_213891.1	VCAM1	Sus scrofa vascular cell adhesion molecule (VCAM1), mRNA	0.367663	4.94229
GO:0042157	lipoprotein metabolic process	BP144557		BP144557 full-length enriched swine cDNA library, adult ovary Sus scrofa cDNA clone OVR010019H05 5', mRNA sequence	0.367663	4.94229
GO:0032270	positive regulation of cellular protein metabolic process	NM_001113437.1	LRRK2	Sus scrofa leucine-rich repeat kinase 2 (LRRK2), mRNA	0.367663	4.94229
GO:0031399	regulation of protein modification process	NM_001113437.1	LRRK2	Sus scrofa leucine-rich repeat kinase 2 (LRRK2), mRNA	0.367663	4.94229
GO:0009952	anterior/posterior pattern formation	AK236542.1		Sus scrofa mRNA, clone:OVRM10201D11, expressed in ovary	0.378332	4.78784
GO:0002694	regulation of leukocyte activation	NM_213891.1	VCAM1	Sus scrofa vascular cell adhesion molecule (VCAM1), mRNA	0.378332	4.78784
GO:0006790	sulfur metabolic process	CK464479		935479 MARC 4PIG Sus scrofa cDNA 3', mRNA sequence	0.378332	4.78784
GO:0016310	phosphorylation	DN109213		1106782 MARC 4PIG Sus scrofa cDNA 5', mRNA sequence	0.38407	1.98975
GO:0016310	phosphorylation	DN132989		996429 MARC 4PIG Sus scrofa cDNA 5', mRNA sequence	0.38407	1.98975
GO:0016310	phosphorylation	NM_001113437.1	LRRK2	Sus scrofa leucine-rich repeat kinase 2 (LRRK2), mRNA	0.38407	1.98975
GO:0019219	regulation of nucleobase, nucleoside, nucleotide and nucleic acid metabolic process	AY610379.1		Sus scrofa clone rese11c_b12.y1.abd, mRNA sequence	0.387336	0.543944
GO:0019219	regulation of nucleobase, nucleoside, nucleotide and nucleic acid metabolic process	BX672987		BX672987 Sus Scrofa library (scac) Sus scrofa cDNA clone scac0037.a.01 5prim, mRNA sequence	0.387336	0.543944
GO:0019219	regulation of nucleobase, nucleoside, nucleotide and nucleic acid metabolic process	XM_001927909.1	LOC100156871	PREDICTED: Sus scrofa similar to DEK oncogene, transcript variant 1 (LOC100156871), mRNA	0.387336	0.543944
GO:0050865	regulation of cell activation	NM_213891.1	VCAM1	Sus scrofa vascular cell adhesion molecule (VCAM1), mRNA	0.388932	4.64275
GO:0016197	endosome transport	AK234218.1		Sus scrofa mRNA, clone:OVR010028H07, expressed in ovary	0.399462	4.5062
GO:0019318	hexose metabolic process	AY609808.1		Sus scrofa clone Clu_32103.scr.msk.p1.Contig2, mRNA sequence	0.399462	4.5062
GO:0051247	positive regulation of protein metabolic process	NM_001113437.1	LRRK2	Sus scrofa leucine-rich repeat kinase 2 (LRRK2), mRNA	0.399462	4.5062
GO:0000003	reproduction	AF281156.1	HOXD10A	Sus scrofa homeobox protein A10 mRNA, partial cds	0.402504	2.41277
GO:0000003	reproduction	XM_001927909.1	LOC100156871	PREDICTED: Sus scrofa similar to DEK oncogene, transcript variant 1 (LOC100156871), mRNA	0.402504	2.41277
GO:0022414	reproductive process	AF281156.1	HOXD10A	Sus scrofa homeobox protein A10 mRNA, partial cds	0.402504	2.41277
GO:0022414	reproductive process	XM_001927909.1	LOC100156871	PREDICTED: Sus scrofa similar to DEK oncogene, transcript variant 1 (LOC100156871), mRNA	0.402504	2.41277
GO:0019222	regulation of metabolic process	AY610379.1		Sus scrofa clone rese11c_b12.y1.abd, mRNA sequence	0.405433	0.603787
GO:0019222	regulation of metabolic process	BX672987		BX672987 Sus Scrofa library (scac) Sus scrofa cDNA clone scac0037.a.01 5prim, mRNA sequence	0.405433	0.603787
GO:0019222	regulation of metabolic process	NM_001113437.1	LRRK2	Sus scrofa leucine-rich repeat kinase 2 (LRRK2), mRNA	0.405433	0.603787
GO:0019222	regulation of metabolic process	XM_001927909.1	LOC100156871	PREDICTED: Sus scrofa similar to DEK oncogene, transcript variant 1 (LOC100156871), mRNA	0.405433	0.603787
GO:0045087	innate immune response	AY610379.1		Sus scrofa clone rese11c_b12.y1.abd, mRNA sequence	0.409925	4.37745
GO:0005996	monosaccharide metabolic process	AY609808.1		Sus scrofa clone Clu_32103.scr.msk.p1.Contig2, mRNA sequence	0.409925	4.37745
GO:0031323	regulation of cellular metabolic process	AY610379.1		Sus scrofa clone rese11c_b12.y1.abd, mRNA sequence	0.415332	0.60798
GO:0031323	regulation of cellular metabolic process	BX672987		BX672987 Sus Scrofa library (scac) Sus scrofa cDNA clone scac0037.a.01 5prim, mRNA sequence	0.415332	0.60798
GO:0031323	regulation of cellular metabolic process	NM_001113437.1	LRRK2	Sus scrofa leucine-rich repeat kinase 2 (LRRK2), mRNA	0.415332	0.60798
GO:0031323	regulation of cellular metabolic process	XM_001927909.1	LOC100156871	PREDICTED: Sus scrofa similar to DEK oncogene, transcript variant 1 (LOC100156871), mRNA	0.415332	0.60798
GO:0007242	intracellular signaling cascade	BP144557		BP144557 full-length enriched swine cDNA library, adult ovary Sus scrofa cDNA clone OVR010019H05 5', mRNA sequence	0.42401	1.69294
GO:0007242	intracellular signaling cascade	DN109213		1106782 MARC 4PIG Sus scrofa cDNA 5', mRNA sequence	0.42401	1.69294
GO:0007242	intracellular signaling cascade	DN132989		996429 MARC 4PIG Sus scrofa cDNA 5', mRNA sequence	0.42401	1.69294
GO:0007242	intracellular signaling cascade	NM_001113437.1	LRRK2	Sus scrofa leucine-rich repeat kinase 2 (LRRK2), mRNA	0.42401	1.69294
GO:0030154	cell differentiation	AK233462.1		Sus scrofa mRNA, clone:LVRM10152C10, expressed in liver	0.429463	1.68364
GO:0030154	cell differentiation	BP438382		BP438382 full-length enriched swine cDNA library, adult lung Sus scrofa cDNA clone LNG010019F06 5', mRNA sequence	0.429463	1.68364
GO:0030154	cell differentiation	DN134303		999500 MARC 4PIG Sus scrofa cDNA 5', mRNA sequence	0.429463	1.68364
GO:0030154	cell differentiation	NM_213891.1	VCAM1	Sus scrofa vascular cell adhesion molecule (VCAM1), mRNA	0.429463	1.68364
GO:0007050	cell cycle arrest	BI186305		UNL-P-FN-cc-g-08-0-UNL.s2 UNL-P-FN Sus scrofa cDNA clone UNL-P-FN-cc-g-08-0-UNL 3', mRNA sequence	0.430646	4.14083
GO:0060255	regulation of macromolecule metabolic process	AY610379.1		Sus scrofa clone rese11c_b12.y1.abd, mRNA sequence	0.43717	0.617164
GO:0060255	regulation of macromolecule metabolic process	BX672987		BX672987 Sus Scrofa library (scac) Sus scrofa cDNA clone scac0037.a.01 5prim, mRNA sequence	0.43717	0.617164
GO:0060255	regulation of macromolecule metabolic process	NM_001113437.1	LRRK2	Sus scrofa leucine-rich repeat kinase 2 (LRRK2), mRNA	0.43717	0.617164
GO:0060255	regulation of macromolecule metabolic process	XM_001927909.1	LOC100156871	PREDICTED: Sus scrofa similar to DEK oncogene, transcript variant 1 (LOC100156871), mRNA	0.43717	0.617164
GO:0045449	regulation of transcription	AY610379.1		Sus scrofa clone rese11c_b12.y1.abd, mRNA sequence	0.4402	0.566748
GO:0045449	regulation of transcription	BX672987		BX672987 Sus Scrofa library (scac) Sus scrofa cDNA clone scac0037.a.01 5prim, mRNA sequence	0.4402	0.566748
GO:0045449	regulation of transcription	XM_001927909.1	LOC100156871	PREDICTED: Sus scrofa similar to DEK oncogene, transcript variant 1 (LOC100156871), mRNA	0.4402	0.566748
GO:0007409	axonogenesis	AK233462.1		Sus scrofa mRNA, clone:LVRM10152C10, expressed in liver	0.440906	4.03187
GO:0007265	Ras protein signal transduction	DN132989		996429 MARC 4PIG Sus scrofa cDNA 5', mRNA sequence	0.440906	4.03187
GO:0000041	transition metal ion transport	XM_001929505.1	LOC100153098	PREDICTED: Sus scrofa similar to Solute carrier family 39 (zinc transporter), member 1 (LOC100153098), mRNA	0.440906	4.03187
GO:0048856	anatomical structure development	AK233462.1		Sus scrofa mRNA, clone:LVRM10152C10, expressed in liver	0.449603	1.47082
GO:0048856	anatomical structure development	AK236542.1		Sus scrofa mRNA, clone:OVRM10201D11, expressed in ovary	0.449603	1.47082
GO:0048856	anatomical structure development	BP144557		BP144557 full-length enriched swine cDNA library, adult ovary Sus scrofa cDNA clone OVR010019H05 5', mRNA sequence	0.449603	1.47082
GO:0048856	anatomical structure development	BP438382		BP438382 full-length enriched swine cDNA library, adult lung Sus scrofa cDNA clone LNG010019F06 5', mRNA sequence	0.449603	1.47082
GO:0048856	anatomical structure development	DN134303		999500 MARC 4PIG Sus scrofa cDNA 5', mRNA sequence	0.449603	1.47082
GO:0048856	anatomical structure development	NM_213891.1	VCAM1	Sus scrofa vascular cell adhesion molecule (VCAM1), mRNA	0.449603	1.47082
GO:0007243	protein kinase cascade	DN109213		1106782 MARC 4PIG Sus scrofa cDNA 5', mRNA sequence	0.455079	2.22045
GO:0007243	protein kinase cascade	NM_001113437.1	LRRK2	Sus scrofa leucine-rich repeat kinase 2 (LRRK2), mRNA	0.455079	2.22045
GO:0005975	carbohydrate metabolic process	AY609808.1		Sus scrofa clone Clu_32103.scr.msk.p1.Contig2, mRNA sequence	0.459886	2.20447
GO:0005975	carbohydrate metabolic process	CK464479		935479 MARC 4PIG Sus scrofa cDNA 3', mRNA sequence	0.459886	2.20447
GO:0048667	cell morphogenesis involved in neuron differentiation	AK233462.1		Sus scrofa mRNA, clone:LVRM10152C10, expressed in liver	0.461227	3.83027
GO:0048812	neurite morphogenesis	AK233462.1		Sus scrofa mRNA, clone:LVRM10152C10, expressed in liver	0.461227	3.83027
GO:0044238	primary metabolic process	AK232649.1		Sus scrofa mRNA, clone:LVR010105F03, expressed in liver	0.463371	1.2263
GO:0044238	primary metabolic process	AK234218.1		Sus scrofa mRNA, clone:OVR010028H07, expressed in ovary	0.463371	1.2263
GO:0044238	primary metabolic process	AK234332.1		Sus scrofa mRNA, clone:OVR010044D10, expressed in ovary	0.463371	1.2263
GO:0044238	primary metabolic process	AK239557.1		Sus scrofa mRNA, clone:THY010112D06, expressed in thymus	0.463371	1.2263
GO:0044238	primary metabolic process	AU296347		AU296347 full-length enriched pig cDNA library, main and accessory olfactory bulb Sus scrofa cDNA clone olf_091_A09 5', mRNA sequence	0.463371	1.2263
GO:0044238	primary metabolic process	AY609808.1		Sus scrofa clone Clu_32103.scr.msk.p1.Contig2, mRNA sequence	0.463371	1.2263
GO:0044238	primary metabolic process	BI186305		UNL-P-FN-cc-g-08-0-UNL.s2 UNL-P-FN Sus scrofa cDNA clone UNL-P-FN-cc-g-08-0-UNL 3', mRNA sequence	0.463371	1.2263
GO:0044238	primary metabolic process	BP144557		BP144557 full-length enriched swine cDNA library, adult ovary Sus scrofa cDNA clone OVR010019H05 5', mRNA sequence	0.463371	1.2263
GO:0044238	primary metabolic process	BX669885		BX669885 Sus Scrofa library (scac) Sus scrofa cDNA clone scac0030.p.08 5prim, mRNA sequence	0.463371	1.2263
GO:0044238	primary metabolic process	CJ009232		CJ009232 full-length enriched swine cDNA library, adult mesenteric lymph node Sus scrofa cDNA clone MLN01D050021 5', mRNA sequence	0.463371	1.2263
GO:0044238	primary metabolic process	CK464479		935479 MARC 4PIG Sus scrofa cDNA 3', mRNA sequence	0.463371	1.2263
GO:0044238	primary metabolic process	CV877363		PDUts1163F04 Porcine testis cDNA library I Sus scrofa cDNA clone PDUts1163F04 5' similar to homologue to ref|NM_014003.3| Homo sapiens DEAH (Asp-Glu-Ala-His) box polypeptide 38 (DHX38), mRNA, mRNA sequence	0.463371	1.2263
GO:0044238	primary metabolic process	DN109213		1106782 MARC 4PIG Sus scrofa cDNA 5', mRNA sequence	0.463371	1.2263
GO:0044238	primary metabolic process	DN132989		996429 MARC 4PIG Sus scrofa cDNA 5', mRNA sequence	0.463371	1.2263
GO:0044238	primary metabolic process	NM_001113437.1	LRRK2	Sus scrofa leucine-rich repeat kinase 2 (LRRK2), mRNA	0.463371	1.2263
GO:0044238	primary metabolic process	XM_001928679.1	LOC100155893	PREDICTED: Sus scrofa similar to arginase, type II (LOC100155893), mRNA	0.463371	1.2263
GO:0044267	cellular protein metabolic process	AK232649.1		Sus scrofa mRNA, clone:LVR010105F03, expressed in liver	0.474044	1.35885
GO:0044267	cellular protein metabolic process	AK234332.1		Sus scrofa mRNA, clone:OVR010044D10, expressed in ovary	0.474044	1.35885
GO:0044267	cellular protein metabolic process	BP144557		BP144557 full-length enriched swine cDNA library, adult ovary Sus scrofa cDNA clone OVR010019H05 5', mRNA sequence	0.474044	1.35885
GO:0044267	cellular protein metabolic process	CJ009232		CJ009232 full-length enriched swine cDNA library, adult mesenteric lymph node Sus scrofa cDNA clone MLN01D050021 5', mRNA sequence	0.474044	1.35885
GO:0044267	cellular protein metabolic process	CK464479		935479 MARC 4PIG Sus scrofa cDNA 3', mRNA sequence	0.474044	1.35885
GO:0044267	cellular protein metabolic process	DN109213		1106782 MARC 4PIG Sus scrofa cDNA 5', mRNA sequence	0.474044	1.35885
GO:0044267	cellular protein metabolic process	DN132989		996429 MARC 4PIG Sus scrofa cDNA 5', mRNA sequence	0.474044	1.35885
GO:0044267	cellular protein metabolic process	NM_001113437.1	LRRK2	Sus scrofa leucine-rich repeat kinase 2 (LRRK2), mRNA	0.474044	1.35885
GO:0032990	cell part morphogenesis	AK233462.1		Sus scrofa mRNA, clone:LVRM10152C10, expressed in liver	0.491215	3.56304
GO:0048858	cell projection morphogenesis	AK233462.1		Sus scrofa mRNA, clone:LVRM10152C10, expressed in liver	0.491215	3.56304
GO:0003002	regionalization	AK236542.1		Sus scrofa mRNA, clone:OVRM10201D11, expressed in ovary	0.491215	3.56304
GO:0019538	protein metabolic process	AK232649.1		Sus scrofa mRNA, clone:LVR010105F03, expressed in liver	0.493847	1.34248
GO:0019538	protein metabolic process	AK234332.1		Sus scrofa mRNA, clone:OVR010044D10, expressed in ovary	0.493847	1.34248
GO:0019538	protein metabolic process	BP144557		BP144557 full-length enriched swine cDNA library, adult ovary Sus scrofa cDNA clone OVR010019H05 5', mRNA sequence	0.493847	1.34248
GO:0019538	protein metabolic process	CJ009232		CJ009232 full-length enriched swine cDNA library, adult mesenteric lymph node Sus scrofa cDNA clone MLN01D050021 5', mRNA sequence	0.493847	1.34248
GO:0019538	protein metabolic process	CK464479		935479 MARC 4PIG Sus scrofa cDNA 3', mRNA sequence	0.493847	1.34248
GO:0019538	protein metabolic process	DN109213		1106782 MARC 4PIG Sus scrofa cDNA 5', mRNA sequence	0.493847	1.34248
GO:0019538	protein metabolic process	DN132989		996429 MARC 4PIG Sus scrofa cDNA 5', mRNA sequence	0.493847	1.34248
GO:0019538	protein metabolic process	NM_001113437.1	LRRK2	Sus scrofa leucine-rich repeat kinase 2 (LRRK2), mRNA	0.493847	1.34248
GO:0008203	cholesterol metabolic process	AK234218.1		Sus scrofa mRNA, clone:OVR010028H07, expressed in ovary	0.501082	3.48207
GO:0009058	biosynthetic process	AK234218.1		Sus scrofa mRNA, clone:OVR010028H07, expressed in ovary	0.509846	0.51848
GO:0009058	biosynthetic process	AK239557.1		Sus scrofa mRNA, clone:THY010112D06, expressed in thymus	0.509846	0.51848
GO:0055080	cation homeostasis	BP144557		BP144557 full-length enriched swine cDNA library, adult ovary Sus scrofa cDNA clone OVR010019H05 5', mRNA sequence	0.510884	3.40469
GO:0030003	cellular cation homeostasis	BP144557		BP144557 full-length enriched swine cDNA library, adult ovary Sus scrofa cDNA clone OVR010019H05 5', mRNA sequence	0.510884	3.40469
GO:0006811	ion transport	DN109213		1106782 MARC 4PIG Sus scrofa cDNA 5', mRNA sequence	0.51294	2.04281
GO:0006811	ion transport	XM_001929505.1	LOC100153098	PREDICTED: Sus scrofa similar to Solute carrier family 39 (zinc transporter), member 1 (LOC100153098), mRNA	0.51294	2.04281
GO:0008632	apoptotic program	BP144557		BP144557 full-length enriched swine cDNA library, adult ovary Sus scrofa cDNA clone OVR010019H05 5', mRNA sequence	0.520623	3.33067
GO:0007420	brain development	BP144557		BP144557 full-length enriched swine cDNA library, adult ovary Sus scrofa cDNA clone OVR010019H05 5', mRNA sequence	0.530299	3.25981
GO:0000904	cell morphogenesis involved in differentiation	AK233462.1		Sus scrofa mRNA, clone:LVRM10152C10, expressed in liver	0.530299	3.25981
GO:0031175	neurite development	AK233462.1		Sus scrofa mRNA, clone:LVRM10152C10, expressed in liver	0.530299	3.25981
GO:0016125	sterol metabolic process	AK234218.1		Sus scrofa mRNA, clone:OVR010028H07, expressed in ovary	0.530299	3.25981
GO:0044249	cellular biosynthetic process	AK234218.1		Sus scrofa mRNA, clone:OVR010028H07, expressed in ovary	0.530858	0.527404
GO:0044249	cellular biosynthetic process	AK239557.1		Sus scrofa mRNA, clone:THY010112D06, expressed in thymus	0.530858	0.527404
GO:0006869	lipid transport	AK232649.1		Sus scrofa mRNA, clone:LVR010105F03, expressed in liver	0.539911	3.19189
GO:0048869	cellular developmental process	AK233462.1		Sus scrofa mRNA, clone:LVRM10152C10, expressed in liver	0.544969	1.51319
GO:0048869	cellular developmental process	BP438382		BP438382 full-length enriched swine cDNA library, adult lung Sus scrofa cDNA clone LNG010019F06 5', mRNA sequence	0.544969	1.51319
GO:0048869	cellular developmental process	DN134303		999500 MARC 4PIG Sus scrofa cDNA 5', mRNA sequence	0.544969	1.51319
GO:0048869	cellular developmental process	NM_213891.1	VCAM1	Sus scrofa vascular cell adhesion molecule (VCAM1), mRNA	0.544969	1.51319
GO:0006396	RNA processing	BI186305		UNL-P-FN-cc-g-08-0-UNL.s2 UNL-P-FN Sus scrofa cDNA clone UNL-P-FN-cc-g-08-0-UNL 3', mRNA sequence	0.545546	1.65335
GO:0006396	RNA processing	BX669885		BX669885 Sus Scrofa library (scac) Sus scrofa cDNA clone scac0030.p.08 5prim, mRNA sequence	0.545546	1.65335
GO:0006396	RNA processing	CV877363		PDUts1163F04 Porcine testis cDNA library I Sus scrofa cDNA clone PDUts1163F04 5' similar to homologue to ref|NM_014003.3| Homo sapiens DEAH (Asp-Glu-Ala-His) box polypeptide 38 (DHX38), mRNA, mRNA sequence	0.545546	1.65335
GO:0007165	signal transduction	BI186305		UNL-P-FN-cc-g-08-0-UNL.s2 UNL-P-FN Sus scrofa cDNA clone UNL-P-FN-cc-g-08-0-UNL 3', mRNA sequence	0.554807	1.32568
GO:0007165	signal transduction	BP144557		BP144557 full-length enriched swine cDNA library, adult ovary Sus scrofa cDNA clone OVR010019H05 5', mRNA sequence	0.554807	1.32568
GO:0007165	signal transduction	CJ009232		CJ009232 full-length enriched swine cDNA library, adult mesenteric lymph node Sus scrofa cDNA clone MLN01D050021 5', mRNA sequence	0.554807	1.32568
GO:0007165	signal transduction	DN109213		1106782 MARC 4PIG Sus scrofa cDNA 5', mRNA sequence	0.554807	1.32568
GO:0007165	signal transduction	DN132989		996429 MARC 4PIG Sus scrofa cDNA 5', mRNA sequence	0.554807	1.32568
GO:0007165	signal transduction	NM_001113437.1	LRRK2	Sus scrofa leucine-rich repeat kinase 2 (LRRK2), mRNA	0.554807	1.32568
GO:0007165	signal transduction	XM_001927909.1	LOC100156871	PREDICTED: Sus scrofa similar to DEK oncogene, transcript variant 1 (LOC100156871), mRNA	0.554807	1.32568
GO:0006796	phosphate metabolic process	DN109213		1106782 MARC 4PIG Sus scrofa cDNA 5', mRNA sequence	0.556151	1.6357
GO:0006796	phosphate metabolic process	DN132989		996429 MARC 4PIG Sus scrofa cDNA 5', mRNA sequence	0.556151	1.6357
GO:0006796	phosphate metabolic process	NM_001113437.1	LRRK2	Sus scrofa leucine-rich repeat kinase 2 (LRRK2), mRNA	0.556151	1.6357
GO:0006793	phosphorus metabolic process	DN109213		1106782 MARC 4PIG Sus scrofa cDNA 5', mRNA sequence	0.556151	1.6357
GO:0006793	phosphorus metabolic process	DN132989		996429 MARC 4PIG Sus scrofa cDNA 5', mRNA sequence	0.556151	1.6357
GO:0006793	phosphorus metabolic process	NM_001113437.1	LRRK2	Sus scrofa leucine-rich repeat kinase 2 (LRRK2), mRNA	0.556151	1.6357
GO:0006996	organelle organization	BP144557		BP144557 full-length enriched swine cDNA library, adult ovary Sus scrofa cDNA clone OVR010019H05 5', mRNA sequence	0.556692	0.395894
GO:0046649	lymphocyte activation	NM_213891.1	VCAM1	Sus scrofa vascular cell adhesion molecule (VCAM1), mRNA	0.55895	3.06422
GO:0044260	cellular macromolecule metabolic process	AK232649.1		Sus scrofa mRNA, clone:LVR010105F03, expressed in liver	0.565328	1.21676
GO:0044260	cellular macromolecule metabolic process	AK234332.1		Sus scrofa mRNA, clone:OVR010044D10, expressed in ovary	0.565328	1.21676
GO:0044260	cellular macromolecule metabolic process	AK239557.1		Sus scrofa mRNA, clone:THY010112D06, expressed in thymus	0.565328	1.21676
GO:0044260	cellular macromolecule metabolic process	BI186305		UNL-P-FN-cc-g-08-0-UNL.s2 UNL-P-FN Sus scrofa cDNA clone UNL-P-FN-cc-g-08-0-UNL 3', mRNA sequence	0.565328	1.21676
GO:0044260	cellular macromolecule metabolic process	BP144557		BP144557 full-length enriched swine cDNA library, adult ovary Sus scrofa cDNA clone OVR010019H05 5', mRNA sequence	0.565328	1.21676
GO:0044260	cellular macromolecule metabolic process	BX669885		BX669885 Sus Scrofa library (scac) Sus scrofa cDNA clone scac0030.p.08 5prim, mRNA sequence	0.565328	1.21676
GO:0044260	cellular macromolecule metabolic process	CJ009232		CJ009232 full-length enriched swine cDNA library, adult mesenteric lymph node Sus scrofa cDNA clone MLN01D050021 5', mRNA sequence	0.565328	1.21676
GO:0044260	cellular macromolecule metabolic process	CK464479		935479 MARC 4PIG Sus scrofa cDNA 3', mRNA sequence	0.565328	1.21676
GO:0044260	cellular macromolecule metabolic process	CV877363		PDUts1163F04 Porcine testis cDNA library I Sus scrofa cDNA clone PDUts1163F04 5' similar to homologue to ref|NM_014003.3| Homo sapiens DEAH (Asp-Glu-Ala-His) box polypeptide 38 (DHX38), mRNA, mRNA sequence	0.565328	1.21676
GO:0044260	cellular macromolecule metabolic process	DN109213		1106782 MARC 4PIG Sus scrofa cDNA 5', mRNA sequence	0.565328	1.21676
GO:0044260	cellular macromolecule metabolic process	DN132989		996429 MARC 4PIG Sus scrofa cDNA 5', mRNA sequence	0.565328	1.21676
GO:0044260	cellular macromolecule metabolic process	NM_001113437.1	LRRK2	Sus scrofa leucine-rich repeat kinase 2 (LRRK2), mRNA	0.565328	1.21676
GO:0007346	regulation of mitotic cell cycle	BI186305		UNL-P-FN-cc-g-08-0-UNL.s2 UNL-P-FN Sus scrofa cDNA clone UNL-P-FN-cc-g-08-0-UNL 3', mRNA sequence	0.568377	3.00413
GO:0016485	protein processing	NM_001113437.1	LRRK2	Sus scrofa leucine-rich repeat kinase 2 (LRRK2), mRNA	0.587046	2.89077
GO:0048598	embryonic morphogenesis	AK236542.1		Sus scrofa mRNA, clone:OVRM10201D11, expressed in ovary	0.59629	2.83724
GO:0030097	hemopoiesis	NM_213891.1	VCAM1	Sus scrofa vascular cell adhesion molecule (VCAM1), mRNA	0.59629	2.83724
GO:0010468	regulation of gene expression	AK232649.1		Sus scrofa mRNA, clone:LVR010105F03, expressed in liver	0.599546	0.683977
GO:0010468	regulation of gene expression	AY610379.1		Sus scrofa clone rese11c_b12.y1.abd, mRNA sequence	0.599546	0.683977
GO:0010468	regulation of gene expression	BX672987		BX672987 Sus Scrofa library (scac) Sus scrofa cDNA clone scac0037.a.01 5prim, mRNA sequence	0.599546	0.683977
GO:0010468	regulation of gene expression	XM_001927909.1	LOC100156871	PREDICTED: Sus scrofa similar to DEK oncogene, transcript variant 1 (LOC100156871), mRNA	0.599546	0.683977
GO:0015031	protein transport	AK234218.1		Sus scrofa mRNA, clone:OVR010028H07, expressed in ovary	0.609439	1.55281
GO:0015031	protein transport	AY609920.1		Sus scrofa clone Clu_44000.scr.msk.p1.Contig1, mRNA sequence	0.609439	1.55281
GO:0015031	protein transport	BP144557		BP144557 full-length enriched swine cDNA library, adult ovary Sus scrofa cDNA clone OVR010019H05 5', mRNA sequence	0.609439	1.55281
GO:0006520	amino acid metabolic process	XM_001928679.1	LOC100155893	PREDICTED: Sus scrofa similar to arginase, type II (LOC100155893), mRNA	0.614599	2.73591
GO:0045184	establishment of protein localization	AK234218.1		Sus scrofa mRNA, clone:OVR010028H07, expressed in ovary	0.616567	1.54239
GO:0045184	establishment of protein localization	AY609920.1		Sus scrofa clone Clu_44000.scr.msk.p1.Contig1, mRNA sequence	0.616567	1.54239
GO:0045184	establishment of protein localization	BP144557		BP144557 full-length enriched swine cDNA library, adult ovary Sus scrofa cDNA clone OVR010019H05 5', mRNA sequence	0.616567	1.54239
GO:0051641	cellular localization	AK234218.1		Sus scrofa mRNA, clone:OVR010028H07, expressed in ovary	0.617669	0.419756
GO:0043170	macromolecule metabolic process	AK232649.1		Sus scrofa mRNA, clone:LVR010105F03, expressed in liver	0.618754	1.18922
GO:0043170	macromolecule metabolic process	AK234332.1		Sus scrofa mRNA, clone:OVR010044D10, expressed in ovary	0.618754	1.18922
GO:0043170	macromolecule metabolic process	AK239557.1		Sus scrofa mRNA, clone:THY010112D06, expressed in thymus	0.618754	1.18922
GO:0043170	macromolecule metabolic process	BI186305		UNL-P-FN-cc-g-08-0-UNL.s2 UNL-P-FN Sus scrofa cDNA clone UNL-P-FN-cc-g-08-0-UNL 3', mRNA sequence	0.618754	1.18922
GO:0043170	macromolecule metabolic process	BP144557		BP144557 full-length enriched swine cDNA library, adult ovary Sus scrofa cDNA clone OVR010019H05 5', mRNA sequence	0.618754	1.18922
GO:0043170	macromolecule metabolic process	BX669885		BX669885 Sus Scrofa library (scac) Sus scrofa cDNA clone scac0030.p.08 5prim, mRNA sequence	0.618754	1.18922
GO:0043170	macromolecule metabolic process	CJ009232		CJ009232 full-length enriched swine cDNA library, adult mesenteric lymph node Sus scrofa cDNA clone MLN01D050021 5', mRNA sequence	0.618754	1.18922
GO:0043170	macromolecule metabolic process	CK464479		935479 MARC 4PIG Sus scrofa cDNA 3', mRNA sequence	0.618754	1.18922
GO:0043170	macromolecule metabolic process	CV877363		PDUts1163F04 Porcine testis cDNA library I Sus scrofa cDNA clone PDUts1163F04 5' similar to homologue to ref|NM_014003.3| Homo sapiens DEAH (Asp-Glu-Ala-His) box polypeptide 38 (DHX38), mRNA, mRNA sequence	0.618754	1.18922
GO:0043170	macromolecule metabolic process	DN109213		1106782 MARC 4PIG Sus scrofa cDNA 5', mRNA sequence	0.618754	1.18922
GO:0043170	macromolecule metabolic process	DN132989		996429 MARC 4PIG Sus scrofa cDNA 5', mRNA sequence	0.618754	1.18922
GO:0043170	macromolecule metabolic process	NM_001113437.1	LRRK2	Sus scrofa leucine-rich repeat kinase 2 (LRRK2), mRNA	0.618754	1.18922
GO:0048534	hemopoietic or lymphoid organ development	NM_213891.1	VCAM1	Sus scrofa vascular cell adhesion molecule (VCAM1), mRNA	0.623664	2.68791
GO:0009059	macromolecule biosynthetic process	AK239557.1		Sus scrofa mRNA, clone:THY010112D06, expressed in thymus	0.626394	0.423234
GO:0034645	cellular macromolecule biosynthetic process	AK239557.1		Sus scrofa mRNA, clone:THY010112D06, expressed in thymus	0.632265	0.425586
GO:0000165	MAPKKK cascade	NM_001113437.1	LRRK2	Sus scrofa leucine-rich repeat kinase 2 (LRRK2), mRNA	0.63267	2.64157
GO:0002684	positive regulation of immune system process	NM_213891.1	VCAM1	Sus scrofa vascular cell adhesion molecule (VCAM1), mRNA	0.63267	2.64157
GO:0006397	mRNA processing	BX669885		BX669885 Sus Scrofa library (scac) Sus scrofa cDNA clone scac0030.p.08 5prim, mRNA sequence	0.633513	1.75098
GO:0006397	mRNA processing	CV877363		PDUts1163F04 Porcine testis cDNA library I Sus scrofa cDNA clone PDUts1163F04 5' similar to homologue to ref|NM_014003.3| Homo sapiens DEAH (Asp-Glu-Ala-His) box polypeptide 38 (DHX38), mRNA, mRNA sequence	0.633513	1.75098
GO:0006873	cellular ion homeostasis	BP144557		BP144557 full-length enriched swine cDNA library, adult ovary Sus scrofa cDNA clone OVR010019H05 5', mRNA sequence	0.641617	2.59679
GO:0048666	neuron development	AK233462.1		Sus scrofa mRNA, clone:LVRM10152C10, expressed in liver	0.641617	2.59679
GO:0055082	cellular chemical homeostasis	BP144557		BP144557 full-length enriched swine cDNA library, adult ovary Sus scrofa cDNA clone OVR010019H05 5', mRNA sequence	0.650507	2.55351
GO:0050801	ion homeostasis	BP144557		BP144557 full-length enriched swine cDNA library, adult ovary Sus scrofa cDNA clone OVR010019H05 5', mRNA sequence	0.650507	2.55351
GO:0007389	pattern specification process	AK236542.1		Sus scrofa mRNA, clone:OVRM10201D11, expressed in ovary	0.650507	2.55351
GO:0051186	cofactor metabolic process	BP144557		BP144557 full-length enriched swine cDNA library, adult ovary Sus scrofa cDNA clone OVR010019H05 5', mRNA sequence	0.668112	2.47114
GO:0002520	immune system development	NM_213891.1	VCAM1	Sus scrofa vascular cell adhesion molecule (VCAM1), mRNA	0.668112	2.47114
GO:0048232	male gamete generation	AF281156.1	HOXD10A	Sus scrofa homeobox protein A10 mRNA, partial cds	0.668112	2.47114
GO:0007264	small GTPase mediated signal transduction	DN132989		996429 MARC 4PIG Sus scrofa cDNA 5', mRNA sequence	0.668112	2.47114
GO:0007283	spermatogenesis	AF281156.1	HOXD10A	Sus scrofa homeobox protein A10 mRNA, partial cds	0.668112	2.47114
GO:0048519	negative regulation of biological process	BI186305		UNL-P-FN-cc-g-08-0-UNL.s2 UNL-P-FN Sus scrofa cDNA clone UNL-P-FN-cc-g-08-0-UNL 3', mRNA sequence	0.671192	0.588142
GO:0048519	negative regulation of biological process	BP144557		BP144557 full-length enriched swine cDNA library, adult ovary Sus scrofa cDNA clone OVR010019H05 5', mRNA sequence	0.671192	0.588142
GO:0045321	leukocyte activation	NM_213891.1	VCAM1	Sus scrofa vascular cell adhesion molecule (VCAM1), mRNA	0.67683	2.43192
GO:0000398	nuclear mRNA splicing, via spliceosome	CV877363		PDUts1163F04 Porcine testis cDNA library I Sus scrofa cDNA clone PDUts1163F04 5' similar to homologue to ref|NM_014003.3| Homo sapiens DEAH (Asp-Glu-Ala-His) box polypeptide 38 (DHX38), mRNA, mRNA sequence	0.67683	2.43192
GO:0000377	RNA splicing, via transesterification reactions with bulged adenosine as nucleophile	CV877363		PDUts1163F04 Porcine testis cDNA library I Sus scrofa cDNA clone PDUts1163F04 5' similar to homologue to ref|NM_014003.3| Homo sapiens DEAH (Asp-Glu-Ala-His) box polypeptide 38 (DHX38), mRNA, mRNA sequence	0.67683	2.43192
GO:0051649	establishment of localization in cell	AK234218.1		Sus scrofa mRNA, clone:OVR010028H07, expressed in ovary	0.680858	0.44538
GO:0000375	RNA splicing, via transesterification reactions	CV877363		PDUts1163F04 Porcine testis cDNA library I Sus scrofa cDNA clone PDUts1163F04 5' similar to homologue to ref|NM_014003.3| Homo sapiens DEAH (Asp-Glu-Ala-His) box polypeptide 38 (DHX38), mRNA, mRNA sequence	0.68549	2.39392
GO:0007154	cell communication	BI186305		UNL-P-FN-cc-g-08-0-UNL.s2 UNL-P-FN Sus scrofa cDNA clone UNL-P-FN-cc-g-08-0-UNL 3', mRNA sequence	0.690436	1.22709
GO:0007154	cell communication	BP144557		BP144557 full-length enriched swine cDNA library, adult ovary Sus scrofa cDNA clone OVR010019H05 5', mRNA sequence	0.690436	1.22709
GO:0007154	cell communication	CJ009232		CJ009232 full-length enriched swine cDNA library, adult mesenteric lymph node Sus scrofa cDNA clone MLN01D050021 5', mRNA sequence	0.690436	1.22709
GO:0007154	cell communication	DN109213		1106782 MARC 4PIG Sus scrofa cDNA 5', mRNA sequence	0.690436	1.22709
GO:0007154	cell communication	DN132989		996429 MARC 4PIG Sus scrofa cDNA 5', mRNA sequence	0.690436	1.22709
GO:0007154	cell communication	NM_001113437.1	LRRK2	Sus scrofa leucine-rich repeat kinase 2 (LRRK2), mRNA	0.690436	1.22709
GO:0007154	cell communication	XM_001927909.1	LOC100156871	PREDICTED: Sus scrofa similar to DEK oncogene, transcript variant 1 (LOC100156871), mRNA	0.690436	1.22709
GO:0016071	mRNA metabolic process	BX669885		BX669885 Sus Scrofa library (scac) Sus scrofa cDNA clone scac0030.p.08 5prim, mRNA sequence	0.690729	1.63862
GO:0016071	mRNA metabolic process	CV877363		PDUts1163F04 Porcine testis cDNA library I Sus scrofa cDNA clone PDUts1163F04 5' similar to homologue to ref|NM_014003.3| Homo sapiens DEAH (Asp-Glu-Ala-His) box polypeptide 38 (DHX38), mRNA, mRNA sequence	0.690729	1.63862
GO:0007169	transmembrane receptor protein tyrosine kinase signaling pathway	CJ009232		CJ009232 full-length enriched swine cDNA library, adult mesenteric lymph node Sus scrofa cDNA clone MLN01D050021 5', mRNA sequence	0.702643	2.32138
GO:0030182	neuron differentiation	AK233462.1		Sus scrofa mRNA, clone:LVRM10152C10, expressed in liver	0.719573	2.2531
GO:0051716	cellular response to stimulus	AK239557.1		Sus scrofa mRNA, clone:THY010112D06, expressed in thymus	0.733139	1.56338
GO:0051716	cellular response to stimulus	BI186305		UNL-P-FN-cc-g-08-0-UNL.s2 UNL-P-FN Sus scrofa cDNA clone UNL-P-FN-cc-g-08-0-UNL 3', mRNA sequence	0.733139	1.56338
GO:0001775	cell activation	NM_213891.1	VCAM1	Sus scrofa vascular cell adhesion molecule (VCAM1), mRNA	0.736283	2.18873
GO:0048523	negative regulation of cellular process	BI186305		UNL-P-FN-cc-g-08-0-UNL.s2 UNL-P-FN Sus scrofa cDNA clone UNL-P-FN-cc-g-08-0-UNL 3', mRNA sequence	0.736993	0.617786
GO:0048523	negative regulation of cellular process	BP144557		BP144557 full-length enriched swine cDNA library, adult ovary Sus scrofa cDNA clone OVR010019H05 5', mRNA sequence	0.736993	0.617786
GO:0006629	lipid metabolic process	AK234218.1		Sus scrofa mRNA, clone:OVR010028H07, expressed in ovary	0.737751	1.38444
GO:0006629	lipid metabolic process	AU296347		AU296347 full-length enriched pig cDNA library, main and accessory olfactory bulb Sus scrofa cDNA clone olf_091_A09 5', mRNA sequence	0.737751	1.38444
GO:0006629	lipid metabolic process	BP144557		BP144557 full-length enriched swine cDNA library, adult ovary Sus scrofa cDNA clone OVR010019H05 5', mRNA sequence	0.737751	1.38444
GO:0010608	posttranscriptional regulation of gene expression	AK232649.1		Sus scrofa mRNA, clone:LVR010105F03, expressed in liver	0.744557	2.1579
GO:0001501	skeletal system development	AK236542.1		Sus scrofa mRNA, clone:OVRM10201D11, expressed in ovary	0.744557	2.1579
GO:0050896	response to stimulus	AK239557.1		Sus scrofa mRNA, clone:THY010112D06, expressed in thymus	0.756805	0.749197
GO:0050896	response to stimulus	AY610379.1		Sus scrofa clone rese11c_b12.y1.abd, mRNA sequence	0.756805	0.749197
GO:0050896	response to stimulus	BI186305		UNL-P-FN-cc-g-08-0-UNL.s2 UNL-P-FN Sus scrofa cDNA clone UNL-P-FN-cc-g-08-0-UNL 3', mRNA sequence	0.756805	0.749197
GO:0050896	response to stimulus	CJ009232		CJ009232 full-length enriched swine cDNA library, adult mesenteric lymph node Sus scrofa cDNA clone MLN01D050021 5', mRNA sequence	0.756805	0.749197
GO:0008104	protein localization	AK234218.1		Sus scrofa mRNA, clone:OVR010028H07, expressed in ovary	0.759014	1.35986
GO:0008104	protein localization	AY609920.1		Sus scrofa clone Clu_44000.scr.msk.p1.Contig1, mRNA sequence	0.759014	1.35986
GO:0008104	protein localization	BP144557		BP144557 full-length enriched swine cDNA library, adult ovary Sus scrofa cDNA clone OVR010019H05 5', mRNA sequence	0.759014	1.35986
GO:0019725	cellular homeostasis	BP144557		BP144557 full-length enriched swine cDNA library, adult ovary Sus scrofa cDNA clone OVR010019H05 5', mRNA sequence	0.760944	2.09878
GO:0007276	gamete generation	AF281156.1	HOXD10A	Sus scrofa homeobox protein A10 mRNA, partial cds	0.760944	2.09878
GO:0042127	regulation of cell proliferation	BI186305		UNL-P-FN-cc-g-08-0-UNL.s2 UNL-P-FN Sus scrofa cDNA clone UNL-P-FN-cc-g-08-0-UNL 3', mRNA sequence	0.770394	1.50207
GO:0042127	regulation of cell proliferation	NM_213891.1	VCAM1	Sus scrofa vascular cell adhesion molecule (VCAM1), mRNA	0.770394	1.50207
GO:0009057	macromolecule catabolic process	BP144557		BP144557 full-length enriched swine cDNA library, adult ovary Sus scrofa cDNA clone OVR010019H05 5', mRNA sequence	0.776406	0.486384
GO:0030030	cell projection organization	AK233462.1		Sus scrofa mRNA, clone:LVRM10152C10, expressed in liver	0.777118	2.04281
GO:0006519	cellular amino acid and derivative metabolic process	XM_001928679.1	LOC100155893	PREDICTED: Sus scrofa similar to arginase, type II (LOC100155893), mRNA	0.793083	1.98975
GO:0007417	central nervous system development	BP144557		BP144557 full-length enriched swine cDNA library, adult ovary Sus scrofa cDNA clone OVR010019H05 5', mRNA sequence	0.793083	1.98975
GO:0046907	intracellular transport	AK234218.1		Sus scrofa mRNA, clone:OVR010028H07, expressed in ovary	0.804485	0.499058
GO:0048878	chemical homeostasis	BP144557		BP144557 full-length enriched swine cDNA library, adult ovary Sus scrofa cDNA clone OVR010019H05 5', mRNA sequence	0.816643	1.91514
GO:0044265	cellular macromolecule catabolic process	BP144557		BP144557 full-length enriched swine cDNA library, adult ovary Sus scrofa cDNA clone OVR010019H05 5', mRNA sequence	0.818805	0.505646
GO:0008202	steroid metabolic process	AK234218.1		Sus scrofa mRNA, clone:OVR010028H07, expressed in ovary	0.824394	1.89149
GO:0002682	regulation of immune system process	NM_213891.1	VCAM1	Sus scrofa vascular cell adhesion molecule (VCAM1), mRNA	0.832095	1.86843
GO:0019953	sexual reproduction	AF281156.1	HOXD10A	Sus scrofa homeobox protein A10 mRNA, partial cds	0.832095	1.86843
GO:0043285	biopolymer catabolic process	BP144557		BP144557 full-length enriched swine cDNA library, adult ovary Sus scrofa cDNA clone OVR010019H05 5', mRNA sequence	0.833312	0.512411
GO:0043067	regulation of programmed cell death	BP144557		BP144557 full-length enriched swine cDNA library, adult ovary Sus scrofa cDNA clone OVR010019H05 5', mRNA sequence	0.83893	1.39919
GO:0043067	regulation of programmed cell death	NM_001113437.1	LRRK2	Sus scrofa leucine-rich repeat kinase 2 (LRRK2), mRNA	0.83893	1.39919
GO:0033036	macromolecule localization	AK234218.1		Sus scrofa mRNA, clone:OVR010028H07, expressed in ovary	0.839731	1.27322
GO:0033036	macromolecule localization	AY609920.1		Sus scrofa clone Clu_44000.scr.msk.p1.Contig1, mRNA sequence	0.839731	1.27322
GO:0033036	macromolecule localization	BP144557		BP144557 full-length enriched swine cDNA library, adult ovary Sus scrofa cDNA clone OVR010019H05 5', mRNA sequence	0.839731	1.27322
GO:0002376	immune system process	AY610379.1		Sus scrofa clone rese11c_b12.y1.abd, mRNA sequence	0.846675	1.26621
GO:0002376	immune system process	DN132989		996429 MARC 4PIG Sus scrofa cDNA 5', mRNA sequence	0.846675	1.26621
GO:0002376	immune system process	NM_213891.1	VCAM1	Sus scrofa vascular cell adhesion molecule (VCAM1), mRNA	0.846675	1.26621
GO:0030036	actin cytoskeleton organization	DN132989		996429 MARC 4PIG Sus scrofa cDNA 5', mRNA sequence	0.847346	1.82394
GO:0009605	response to external stimulus	BI186305		UNL-P-FN-cc-g-08-0-UNL.s2 UNL-P-FN Sus scrofa cDNA clone UNL-P-FN-cc-g-08-0-UNL 3', mRNA sequence	0.847925	1.38652
GO:0009605	response to external stimulus	CJ009232		CJ009232 full-length enriched swine cDNA library, adult mesenteric lymph node Sus scrofa cDNA clone MLN01D050021 5', mRNA sequence	0.847925	1.38652
GO:0043284	biopolymer biosynthetic process	AK239557.1		Sus scrofa mRNA, clone:THY010112D06, expressed in thymus	0.848005	0.519359
GO:0034961	cellular biopolymer biosynthetic process	AK239557.1		Sus scrofa mRNA, clone:THY010112D06, expressed in thymus	0.848005	0.519359
GO:0043283	biopolymer metabolic process	AK234332.1		Sus scrofa mRNA, clone:OVR010044D10, expressed in ovary	0.848377	1.10065
GO:0043283	biopolymer metabolic process	AK239557.1		Sus scrofa mRNA, clone:THY010112D06, expressed in thymus	0.848377	1.10065
GO:0043283	biopolymer metabolic process	BI186305		UNL-P-FN-cc-g-08-0-UNL.s2 UNL-P-FN Sus scrofa cDNA clone UNL-P-FN-cc-g-08-0-UNL 3', mRNA sequence	0.848377	1.10065
GO:0043283	biopolymer metabolic process	BP144557		BP144557 full-length enriched swine cDNA library, adult ovary Sus scrofa cDNA clone OVR010019H05 5', mRNA sequence	0.848377	1.10065
GO:0043283	biopolymer metabolic process	BX669885		BX669885 Sus Scrofa library (scac) Sus scrofa cDNA clone scac0030.p.08 5prim, mRNA sequence	0.848377	1.10065
GO:0043283	biopolymer metabolic process	CJ009232		CJ009232 full-length enriched swine cDNA library, adult mesenteric lymph node Sus scrofa cDNA clone MLN01D050021 5', mRNA sequence	0.848377	1.10065
GO:0043283	biopolymer metabolic process	CV877363		PDUts1163F04 Porcine testis cDNA library I Sus scrofa cDNA clone PDUts1163F04 5' similar to homologue to ref|NM_014003.3| Homo sapiens DEAH (Asp-Glu-Ala-His) box polypeptide 38 (DHX38), mRNA, mRNA sequence	0.848377	1.10065
GO:0043283	biopolymer metabolic process	DN109213		1106782 MARC 4PIG Sus scrofa cDNA 5', mRNA sequence	0.848377	1.10065
GO:0043283	biopolymer metabolic process	DN132989		996429 MARC 4PIG Sus scrofa cDNA 5', mRNA sequence	0.848377	1.10065
GO:0043283	biopolymer metabolic process	NM_001113437.1	LRRK2	Sus scrofa leucine-rich repeat kinase 2 (LRRK2), mRNA	0.848377	1.10065
GO:0009308	cellular amine metabolic process	XM_001928679.1	LOC100155893	PREDICTED: Sus scrofa similar to arginase, type II (LOC100155893), mRNA	0.869854	1.76104
GO:0007166	cell surface receptor linked signal transduction	CJ009232		CJ009232 full-length enriched swine cDNA library, adult mesenteric lymph node Sus scrofa cDNA clone MLN01D050021 5', mRNA sequence	0.870395	0.530141
GO:0006259	DNA metabolic process	AK239557.1		Sus scrofa mRNA, clone:THY010112D06, expressed in thymus	0.883544	1.33809
GO:0006259	DNA metabolic process	BP144557		BP144557 full-length enriched swine cDNA library, adult ovary Sus scrofa cDNA clone OVR010019H05 5', mRNA sequence	0.883544	1.33809
GO:0048699	generation of neurons	AK233462.1		Sus scrofa mRNA, clone:LVRM10152C10, expressed in liver	0.891925	1.70234
GO:0034641	cellular nitrogen compound metabolic process	XM_001928679.1	LOC100155893	PREDICTED: Sus scrofa similar to arginase, type II (LOC100155893), mRNA	0.913567	1.64743
GO:0006260	DNA replication	AK239557.1		Sus scrofa mRNA, clone:THY010112D06, expressed in thymus	0.913567	1.64743
GO:0007167	enzyme linked receptor protein signaling pathway	CJ009232		CJ009232 full-length enriched swine cDNA library, adult mesenteric lymph node Sus scrofa cDNA clone MLN01D050021 5', mRNA sequence	0.920688	1.6299
GO:0043066	negative regulation of apoptosis	BP144557		BP144557 full-length enriched swine cDNA library, adult ovary Sus scrofa cDNA clone OVR010019H05 5', mRNA sequence	0.920688	1.6299
GO:0043069	negative regulation of programmed cell death	BP144557		BP144557 full-length enriched swine cDNA library, adult ovary Sus scrofa cDNA clone OVR010019H05 5', mRNA sequence	0.920688	1.6299
GO:0006807	nitrogen compound metabolic process	XM_001928679.1	LOC100155893	PREDICTED: Sus scrofa similar to arginase, type II (LOC100155893), mRNA	0.927762	1.61275
GO:0030001	metal ion transport	XM_001929505.1	LOC100153098	PREDICTED: Sus scrofa similar to Solute carrier family 39 (zinc transporter), member 1 (LOC100153098), mRNA	0.93479	1.59595
GO:0030029	actin filament-based process	DN132989		996429 MARC 4PIG Sus scrofa cDNA 5', mRNA sequence	0.948709	1.56338
GO:0000902	cell morphogenesis	AK233462.1		Sus scrofa mRNA, clone:LVRM10152C10, expressed in liver	0.948709	1.56338
GO:0032989	cellular structure morphogenesis	AK233462.1		Sus scrofa mRNA, clone:LVRM10152C10, expressed in liver	0.948709	1.56338
GO:0016070	RNA metabolic process	BI186305		UNL-P-FN-cc-g-08-0-UNL.s2 UNL-P-FN Sus scrofa cDNA clone UNL-P-FN-cc-g-08-0-UNL 3', mRNA sequence	0.955656	1.16363
GO:0016070	RNA metabolic process	BX669885		BX669885 Sus Scrofa library (scac) Sus scrofa cDNA clone scac0030.p.08 5prim, mRNA sequence	0.955656	1.16363
GO:0016070	RNA metabolic process	CV877363		PDUts1163F04 Porcine testis cDNA library I Sus scrofa cDNA clone PDUts1163F04 5' similar to homologue to ref|NM_014003.3| Homo sapiens DEAH (Asp-Glu-Ala-His) box polypeptide 38 (DHX38), mRNA, mRNA sequence	0.955656	1.16363
GO:0022008	neurogenesis	AK233462.1		Sus scrofa mRNA, clone:LVRM10152C10, expressed in liver	0.962448	1.53211
GO:0008284	positive regulation of cell proliferation	NM_213891.1	VCAM1	Sus scrofa vascular cell adhesion molecule (VCAM1), mRNA	0.962448	1.53211
GO:0044255	cellular lipid metabolic process	AK234218.1		Sus scrofa mRNA, clone:OVR010028H07, expressed in ovary	0.968137	0.580344
GO:0009056	catabolic process	AK234218.1		Sus scrofa mRNA, clone:OVR010028H07, expressed in ovary	0.982177	1.14053
GO:0009056	catabolic process	AU296347		AU296347 full-length enriched pig cDNA library, main and accessory olfactory bulb Sus scrofa cDNA clone olf_091_A09 5', mRNA sequence	0.982177	1.14053
GO:0009056	catabolic process	BP144557		BP144557 full-length enriched swine cDNA library, adult ovary Sus scrofa cDNA clone OVR010019H05 5', mRNA sequence	0.982177	1.14053
GO:0034960	cellular biopolymer metabolic process	AK239557.1		Sus scrofa mRNA, clone:THY010112D06, expressed in thymus	0.988359	1.08047
GO:0034960	cellular biopolymer metabolic process	BI186305		UNL-P-FN-cc-g-08-0-UNL.s2 UNL-P-FN Sus scrofa cDNA clone UNL-P-FN-cc-g-08-0-UNL 3', mRNA sequence	0.988359	1.08047
GO:0034960	cellular biopolymer metabolic process	BP144557		BP144557 full-length enriched swine cDNA library, adult ovary Sus scrofa cDNA clone OVR010019H05 5', mRNA sequence	0.988359	1.08047
GO:0034960	cellular biopolymer metabolic process	BX669885		BX669885 Sus Scrofa library (scac) Sus scrofa cDNA clone scac0030.p.08 5prim, mRNA sequence	0.988359	1.08047
GO:0034960	cellular biopolymer metabolic process	CV877363		PDUts1163F04 Porcine testis cDNA library I Sus scrofa cDNA clone PDUts1163F04 5' similar to homologue to ref|NM_014003.3| Homo sapiens DEAH (Asp-Glu-Ala-His) box polypeptide 38 (DHX38), mRNA, mRNA sequence	0.988359	1.08047
GO:0006139	nucleobase, nucleoside, nucleotide and nucleic acid metabolic process	AK239557.1		Sus scrofa mRNA, clone:THY010112D06, expressed in thymus	0.998292	1.07441
GO:0006139	nucleobase, nucleoside, nucleotide and nucleic acid metabolic process	BI186305		UNL-P-FN-cc-g-08-0-UNL.s2 UNL-P-FN Sus scrofa cDNA clone UNL-P-FN-cc-g-08-0-UNL 3', mRNA sequence	0.998292	1.07441
GO:0006139	nucleobase, nucleoside, nucleotide and nucleic acid metabolic process	BP144557		BP144557 full-length enriched swine cDNA library, adult ovary Sus scrofa cDNA clone OVR010019H05 5', mRNA sequence	0.998292	1.07441
GO:0006139	nucleobase, nucleoside, nucleotide and nucleic acid metabolic process	BX669885		BX669885 Sus Scrofa library (scac) Sus scrofa cDNA clone scac0030.p.08 5prim, mRNA sequence	0.998292	1.07441
GO:0006139	nucleobase, nucleoside, nucleotide and nucleic acid metabolic process	CV877363		PDUts1163F04 Porcine testis cDNA library I Sus scrofa cDNA clone PDUts1163F04 5' similar to homologue to ref|NM_014003.3| Homo sapiens DEAH (Asp-Glu-Ala-His) box polypeptide 38 (DHX38), mRNA, mRNA sequence	0.998292	1.07441
GO:0009653	anatomical structure morphogenesis	AK233462.1		Sus scrofa mRNA, clone:LVRM10152C10, expressed in liver	1	1.07895
GO:0009653	anatomical structure morphogenesis	AK236542.1		Sus scrofa mRNA, clone:OVRM10201D11, expressed in ovary	1	1.07895
GO:0006915	apoptosis	BP144557		BP144557 full-length enriched swine cDNA library, adult ovary Sus scrofa cDNA clone OVR010019H05 5', mRNA sequence	1	0.994876
GO:0019752	carboxylic acid metabolic process	XM_001928679.1	LOC100155893	PREDICTED: Sus scrofa similar to arginase, type II (LOC100155893), mRNA	1	0.860735
GO:0006812	cation transport	XM_001929505.1	LOC100153098	PREDICTED: Sus scrofa similar to Solute carrier family 39 (zinc transporter), member 1 (LOC100153098), mRNA	1	1.2984
GO:0007049	cell cycle	BI186305		UNL-P-FN-cc-g-08-0-UNL.s2 UNL-P-FN Sus scrofa cDNA clone UNL-P-FN-cc-g-08-0-UNL 3', mRNA sequence	1	0.96663
GO:0007049	cell cycle	CN165338		995752 MARC 4PIG Sus scrofa cDNA 5', mRNA sequence	1	0.96663
GO:0022402	cell cycle process	BI186305		UNL-P-FN-cc-g-08-0-UNL.s2 UNL-P-FN Sus scrofa cDNA clone UNL-P-FN-cc-g-08-0-UNL 3', mRNA sequence	1	0.633103
GO:0008219	cell death	BP144557		BP144557 full-length enriched swine cDNA library, adult ovary Sus scrofa cDNA clone OVR010019H05 5', mRNA sequence	1	0.89597
GO:0048468	cell development	AK233462.1		Sus scrofa mRNA, clone:LVRM10152C10, expressed in liver	1	0.957568
GO:0044248	cellular catabolic process	AK234218.1		Sus scrofa mRNA, clone:OVR010028H07, expressed in ovary	1	0.830411
GO:0044248	cellular catabolic process	BP144557		BP144557 full-length enriched swine cDNA library, adult ovary Sus scrofa cDNA clone OVR010019H05 5', mRNA sequence	1	0.830411
GO:0034984	cellular response to DNA damage stimulus	AK239557.1		Sus scrofa mRNA, clone:THY010112D06, expressed in thymus	1	0.928551
GO:0033554	cellular response to stress	AK239557.1		Sus scrofa mRNA, clone:THY010112D06, expressed in thymus	1	0.823714
GO:0016265	death	BP144557		BP144557 full-length enriched swine cDNA library, adult ovary Sus scrofa cDNA clone OVR010019H05 5', mRNA sequence	1	0.89597
GO:0006952	defense response	AY610379.1		Sus scrofa clone rese11c_b12.y1.abd, mRNA sequence	1	0.860735
GO:0006281	DNA repair	AK239557.1		Sus scrofa mRNA, clone:THY010112D06, expressed in thymus	1	1.04225
GO:0010467	gene expression	BI186305		UNL-P-FN-cc-g-08-0-UNL.s2 UNL-P-FN Sus scrofa cDNA clone UNL-P-FN-cc-g-08-0-UNL 3', mRNA sequence	1	0.965615
GO:0010467	gene expression	BX669885		BX669885 Sus Scrofa library (scac) Sus scrofa cDNA clone scac0030.p.08 5prim, mRNA sequence	1	0.965615
GO:0010467	gene expression	CV877363		PDUts1163F04 Porcine testis cDNA library I Sus scrofa cDNA clone PDUts1163F04 5' similar to homologue to ref|NM_014003.3| Homo sapiens DEAH (Asp-Glu-Ala-His) box polypeptide 38 (DHX38), mRNA, mRNA sequence	1	0.965615
GO:0042592	homeostatic process	BP144557		BP144557 full-length enriched swine cDNA library, adult ovary Sus scrofa cDNA clone OVR010019H05 5', mRNA sequence	1	1.1349
GO:0006955	immune response	AY610379.1		Sus scrofa clone rese11c_b12.y1.abd, mRNA sequence	1	0.81064
GO:0006886	intracellular protein transport	AK234218.1		Sus scrofa mRNA, clone:OVR010028H07, expressed in ovary	1	0.875491
GO:0016044	membrane organization	BP144557		BP144557 full-length enriched swine cDNA library, adult ovary Sus scrofa cDNA clone OVR010019H05 5', mRNA sequence	1	1.24562
GO:0051093	negative regulation of developmental process	BP144557		BP144557 full-length enriched swine cDNA library, adult ovary Sus scrofa cDNA clone OVR010019H05 5', mRNA sequence	1	1.07895
GO:0048513	organ development	BP144557		BP144557 full-length enriched swine cDNA library, adult ovary Sus scrofa cDNA clone OVR010019H05 5', mRNA sequence	1	0.88306
GO:0048513	organ development	NM_213891.1	VCAM1	Sus scrofa vascular cell adhesion molecule (VCAM1), mRNA	1	0.88306
GO:0006082	organic acid metabolic process	XM_001928679.1	LOC100155893	PREDICTED: Sus scrofa similar to arginase, type II (LOC100155893), mRNA	1	0.860735
GO:0055114	oxidation reduction	BW973179		BW973179 full-length enriched swine cDNA library, adult periphral blood mononuclear cell Sus scrofa cDNA clone PBL010079D03 5', mRNA sequence	1	0.96663
GO:0055114	oxidation reduction	XM_001928732.1	ETFA	PREDICTED: Sus scrofa electron-transfer-flavoprotein, alpha polypeptide (glutaric aciduria II) (ETFA), mRNA	1	0.96663
GO:0048518	positive regulation of biological process	BP144557		BP144557 full-length enriched swine cDNA library, adult ovary Sus scrofa cDNA clone OVR010019H05 5', mRNA sequence	1	0.86235
GO:0048518	positive regulation of biological process	NM_001113437.1	LRRK2	Sus scrofa leucine-rich repeat kinase 2 (LRRK2), mRNA	1	0.86235
GO:0048518	positive regulation of biological process	NM_213891.1	VCAM1	Sus scrofa vascular cell adhesion molecule (VCAM1), mRNA	1	0.86235
GO:0043085	positive regulation of catalytic activity	CV873038		PDUts1109G12 Porcine testis cDNA library I Sus scrofa cDNA clone PDUts1109G12 5', mRNA sequence	1	1.10224
GO:0031325	positive regulation of cellular metabolic process	NM_001113437.1	LRRK2	Sus scrofa leucine-rich repeat kinase 2 (LRRK2), mRNA	1	0.722693
GO:0048522	positive regulation of cellular process	BP144557		BP144557 full-length enriched swine cDNA library, adult ovary Sus scrofa cDNA clone OVR010019H05 5', mRNA sequence	1	0.943804
GO:0048522	positive regulation of cellular process	NM_001113437.1	LRRK2	Sus scrofa leucine-rich repeat kinase 2 (LRRK2), mRNA	1	0.943804
GO:0048522	positive regulation of cellular process	NM_213891.1	VCAM1	Sus scrofa vascular cell adhesion molecule (VCAM1), mRNA	1	0.943804
GO:0051094	positive regulation of developmental process	NM_001113437.1	LRRK2	Sus scrofa leucine-rich repeat kinase 2 (LRRK2), mRNA	1	0.975866
GO:0010604	positive regulation of macromolecule metabolic process	NM_001113437.1	LRRK2	Sus scrofa leucine-rich repeat kinase 2 (LRRK2), mRNA	1	0.743742
GO:0009893	positive regulation of metabolic process	NM_001113437.1	LRRK2	Sus scrofa leucine-rich repeat kinase 2 (LRRK2), mRNA	1	0.712609
GO:0043068	positive regulation of programmed cell death	NM_001113437.1	LRRK2	Sus scrofa leucine-rich repeat kinase 2 (LRRK2), mRNA	1	1.33227
GO:0012501	programmed cell death	BP144557		BP144557 full-length enriched swine cDNA library, adult ovary Sus scrofa cDNA clone OVR010019H05 5', mRNA sequence	1	0.975866
GO:0042981	regulation of apoptosis	BP144557		BP144557 full-length enriched swine cDNA library, adult ovary Sus scrofa cDNA clone OVR010019H05 5', mRNA sequence	1	0.70931
GO:0065008	regulation of biological quality	BI186305		UNL-P-FN-cc-g-08-0-UNL.s2 UNL-P-FN Sus scrofa cDNA clone UNL-P-FN-cc-g-08-0-UNL 3', mRNA sequence	1	1.03521
GO:0065008	regulation of biological quality	BP144557		BP144557 full-length enriched swine cDNA library, adult ovary Sus scrofa cDNA clone OVR010019H05 5', mRNA sequence	1	1.03521
GO:0050790	regulation of catalytic activity	CV873038		PDUts1109G12 Porcine testis cDNA library I Sus scrofa cDNA clone PDUts1109G12 5', mRNA sequence	1	0.7193
GO:0051726	regulation of cell cycle	BI186305		UNL-P-FN-cc-g-08-0-UNL.s2 UNL-P-FN Sus scrofa cDNA clone UNL-P-FN-cc-g-08-0-UNL 3', mRNA sequence	1	1.18768
GO:0032268	regulation of cellular protein metabolic process	NM_001113437.1	LRRK2	Sus scrofa leucine-rich repeat kinase 2 (LRRK2), mRNA	1	1.26621
GO:0050793	regulation of developmental process	BP144557		BP144557 full-length enriched swine cDNA library, adult ovary Sus scrofa cDNA clone OVR010019H05 5', mRNA sequence	1	0.898598
GO:0050793	regulation of developmental process	NM_001113437.1	LRRK2	Sus scrofa leucine-rich repeat kinase 2 (LRRK2), mRNA	1	0.898598
GO:0065009	regulation of molecular function	CV873038		PDUts1109G12 Porcine testis cDNA library I Sus scrofa cDNA clone PDUts1109G12 5', mRNA sequence	1	0.633103
GO:0051246	regulation of protein metabolic process	NM_001113437.1	LRRK2	Sus scrofa leucine-rich repeat kinase 2 (LRRK2), mRNA	1	1.20638
GO:0006357	regulation of transcription from RNA polymerase II promoter	XM_001927909.1	LOC100156871	PREDICTED: Sus scrofa similar to DEK oncogene, transcript variant 1 (LOC100156871), mRNA	1	0.766054
GO:0006974	response to DNA damage stimulus	AK239557.1		Sus scrofa mRNA, clone:THY010112D06, expressed in thymus	1	0.865598
GO:0006950	response to stress	AK239557.1		Sus scrofa mRNA, clone:THY010112D06, expressed in thymus	1	0.913783
GO:0006950	response to stress	AY610379.1		Sus scrofa clone rese11c_b12.y1.abd, mRNA sequence	1	0.913783
GO:0006950	response to stress	CJ009232		CJ009232 full-length enriched swine cDNA library, adult mesenteric lymph node Sus scrofa cDNA clone MLN01D050021 5', mRNA sequence	1	0.913783
GO:0009611	response to wounding	CJ009232		CJ009232 full-length enriched swine cDNA library, adult mesenteric lymph node Sus scrofa cDNA clone MLN01D050021 5', mRNA sequence	1	0.988457
GO:0016192	vesicle-mediated transport	AK234218.1		Sus scrofa mRNA, clone:OVR010028H07, expressed in ovary	1	0.660392

## Sheet: Landrace-profile 28(dpc)
GO_id	GO_name	genebank	Gene symbol	Gene Description	Pvalue	Enrichment
GO:0008283	cell proliferation	AK234367.1		Sus scrofa mRNA, clone:OVR010048F09, expressed in ovary	0.00752547	21.6558
GO:0008283	cell proliferation	XM_001927280.1	LOC100153630	PREDICTED: Sus scrofa similar to Cysteine and glycine-rich protein 2 (Cysteine-rich protein 2) (CRP2) (Smooth muscle cell LIM protein) (SmLIM) (LIM domain only protein 5) (LOC100153630), mRNA	0.00752547	21.6558
GO:0016049	cell growth	XM_001927280.1	LOC100153630	PREDICTED: Sus scrofa similar to Cysteine and glycine-rich protein 2 (Cysteine-rich protein 2) (CRP2) (Smooth muscle cell LIM protein) (SmLIM) (LIM domain only protein 5) (LOC100153630), mRNA	0.0198058	100.545
GO:0040007	growth	XM_001927280.1	LOC100153630	PREDICTED: Sus scrofa similar to Cysteine and glycine-rich protein 2 (Cysteine-rich protein 2) (CRP2) (Smooth muscle cell LIM protein) (SmLIM) (LIM domain only protein 5) (LOC100153630), mRNA	0.0296395	67.0298
GO:0008361	regulation of cell size	XM_001927280.1	LOC100153630	PREDICTED: Sus scrofa similar to Cysteine and glycine-rich protein 2 (Cysteine-rich protein 2) (CRP2) (Smooth muscle cell LIM protein) (SmLIM) (LIM domain only protein 5) (LOC100153630), mRNA	0.0781255	25.1362
GO:0007517	muscle development	XM_001927280.1	LOC100153630	PREDICTED: Sus scrofa similar to Cysteine and glycine-rich protein 2 (Cysteine-rich protein 2) (CRP2) (Smooth muscle cell LIM protein) (SmLIM) (LIM domain only protein 5) (LOC100153630), mRNA	0.106678	18.2808
GO:0008284	positive regulation of cell proliferation	AK238779.1		Sus scrofa mRNA, clone:THY010029G04, expressed in thymus	0.137493	14.0762
GO:0009887	organ morphogenesis	XM_001927280.1	LOC100153630	PREDICTED: Sus scrofa similar to Cysteine and glycine-rich protein 2 (Cysteine-rich protein 2) (CRP2) (Smooth muscle cell LIM protein) (SmLIM) (LIM domain only protein 5) (LOC100153630), mRNA	0.173067	11.0837
GO:0042127	regulation of cell proliferation	AK238779.1		Sus scrofa mRNA, clone:THY010029G04, expressed in thymus	0.271052	6.90012
GO:0009653	anatomical structure morphogenesis	XM_001927280.1	LOC100153630	PREDICTED: Sus scrofa similar to Cysteine and glycine-rich protein 2 (Cysteine-rich protein 2) (CRP2) (Smooth muscle cell LIM protein) (SmLIM) (LIM domain only protein 5) (LOC100153630), mRNA	0.367622	4.95643
GO:0065008	regulation of biological quality	XM_001927280.1	LOC100153630	PREDICTED: Sus scrofa similar to Cysteine and glycine-rich protein 2 (Cysteine-rich protein 2) (CRP2) (Smooth muscle cell LIM protein) (SmLIM) (LIM domain only protein 5) (LOC100153630), mRNA	0.381663	4.75549
GO:0048513	organ development	XM_001927280.1	LOC100153630	PREDICTED: Sus scrofa similar to Cysteine and glycine-rich protein 2 (Cysteine-rich protein 2) (CRP2) (Smooth muscle cell LIM protein) (SmLIM) (LIM domain only protein 5) (LOC100153630), mRNA	0.440086	4.05656
GO:0030154	cell differentiation	XM_001927280.1	LOC100153630	PREDICTED: Sus scrofa similar to Cysteine and glycine-rich protein 2 (Cysteine-rich protein 2) (CRP2) (Smooth muscle cell LIM protein) (SmLIM) (LIM domain only protein 5) (LOC100153630), mRNA	0.459117	3.8671
GO:0048869	cellular developmental process	XM_001927280.1	LOC100153630	PREDICTED: Sus scrofa similar to Cysteine and glycine-rich protein 2 (Cysteine-rich protein 2) (CRP2) (Smooth muscle cell LIM protein) (SmLIM) (LIM domain only protein 5) (LOC100153630), mRNA	0.504123	3.47562
GO:0048522	positive regulation of cellular process	AK238779.1		Sus scrofa mRNA, clone:THY010029G04, expressed in thymus	0.590463	2.8904
GO:0048731	system development	XM_001927280.1	LOC100153630	PREDICTED: Sus scrofa similar to Cysteine and glycine-rich protein 2 (Cysteine-rich protein 2) (CRP2) (Smooth muscle cell LIM protein) (SmLIM) (LIM domain only protein 5) (LOC100153630), mRNA	0.634843	2.65089
GO:0048518	positive regulation of biological process	AK238779.1		Sus scrofa mRNA, clone:THY010029G04, expressed in thymus	0.636829	2.64095
GO:0048856	anatomical structure development	XM_001927280.1	LOC100153630	PREDICTED: Sus scrofa similar to Cysteine and glycine-rich protein 2 (Cysteine-rich protein 2) (CRP2) (Smooth muscle cell LIM protein) (SmLIM) (LIM domain only protein 5) (LOC100153630), mRNA	0.725304	2.2522
GO:0007275	multicellular organismal development	XM_001927280.1	LOC100153630	PREDICTED: Sus scrofa similar to Cysteine and glycine-rich protein 2 (Cysteine-rich protein 2) (CRP2) (Smooth muscle cell LIM protein) (SmLIM) (LIM domain only protein 5) (LOC100153630), mRNA	0.811868	1.95232
GO:0032501	multicellular organismal process	XM_001927280.1	LOC100153630	PREDICTED: Sus scrofa similar to Cysteine and glycine-rich protein 2 (Cysteine-rich protein 2) (CRP2) (Smooth muscle cell LIM protein) (SmLIM) (LIM domain only protein 5) (LOC100153630), mRNA	0.967958	1.54345
GO:0032502	developmental process	XM_001927280.1	LOC100153630	PREDICTED: Sus scrofa similar to Cysteine and glycine-rich protein 2 (Cysteine-rich protein 2) (CRP2) (Smooth muscle cell LIM protein) (SmLIM) (LIM domain only protein 5) (LOC100153630), mRNA	1	1.41186

## Sheet: Landrace-profile 67(dpc)
GO_id	GO_name	genebank	Gene symbol	Gene Description	Pvalue	Enrichment
GO:0003012	muscle system process	AK239436.1		Sus scrofa mRNA, clone:THY010103G12, expressed in thymus	0.000155691	6.69273
GO:0003012	muscle system process	AK240563.1		Sus scrofa mRNA, clone:UTR010098F11, expressed in uterus	0.000155691	6.69273
GO:0003012	muscle system process	BX925993		BX925993 Sus Scrofa library (scan) Sus scrofa cDNA clone scan0021.f.19 5prim, mRNA sequence	0.000155691	6.69273
GO:0003012	muscle system process	CK454645		915140 MARC 4PIG Sus scrofa cDNA 5', mRNA sequence	0.000155691	6.69273
GO:0003012	muscle system process	CN163858		993962 MARC 4PIG Sus scrofa cDNA 5', mRNA sequence	0.000155691	6.69273
GO:0003012	muscle system process	EW055180		rpigcb_10659.y1 cty Sus scrofa cDNA 5', mRNA sequence	0.000155691	6.69273
GO:0003012	muscle system process	NM_213855.1	MYH7	Sus scrofa myosin, heavy chain 7, cardiac muscle, beta (MYH7), mRNA	0.000155691	6.69273
GO:0006936	muscle contraction	AK239436.1		Sus scrofa mRNA, clone:THY010103G12, expressed in thymus	0.000155691	6.69273
GO:0006936	muscle contraction	AK240563.1		Sus scrofa mRNA, clone:UTR010098F11, expressed in uterus	0.000155691	6.69273
GO:0006936	muscle contraction	BX925993		BX925993 Sus Scrofa library (scan) Sus scrofa cDNA clone scan0021.f.19 5prim, mRNA sequence	0.000155691	6.69273
GO:0006936	muscle contraction	CK454645		915140 MARC 4PIG Sus scrofa cDNA 5', mRNA sequence	0.000155691	6.69273
GO:0006936	muscle contraction	CN163858		993962 MARC 4PIG Sus scrofa cDNA 5', mRNA sequence	0.000155691	6.69273
GO:0006936	muscle contraction	EW055180		rpigcb_10659.y1 cty Sus scrofa cDNA 5', mRNA sequence	0.000155691	6.69273
GO:0006936	muscle contraction	NM_213855.1	MYH7	Sus scrofa myosin, heavy chain 7, cardiac muscle, beta (MYH7), mRNA	0.000155691	6.69273
GO:0006986	response to unfolded protein	AK232205.1		Sus scrofa mRNA, clone:LNG010103E07, expressed in lung	0.000199968	15.2977
GO:0006986	response to unfolded protein	AK234533.1		Sus scrofa mRNA, clone:OVR010076H11, expressed in ovary	0.000199968	15.2977
GO:0006986	response to unfolded protein	AK239728.1		Sus scrofa mRNA, clone:THY010126C02, expressed in thymus	0.000199968	15.2977
GO:0006986	response to unfolded protein	AY609666.1		Sus scrofa clone Clu_24219.scr.msk.p1.Contig4, mRNA sequence	0.000199968	15.2977
GO:0051789	response to protein stimulus	AK232205.1		Sus scrofa mRNA, clone:LNG010103E07, expressed in lung	0.000199968	15.2977
GO:0051789	response to protein stimulus	AK234533.1		Sus scrofa mRNA, clone:OVR010076H11, expressed in ovary	0.000199968	15.2977
GO:0051789	response to protein stimulus	AK239728.1		Sus scrofa mRNA, clone:THY010126C02, expressed in thymus	0.000199968	15.2977
GO:0051789	response to protein stimulus	AY609666.1		Sus scrofa clone Clu_24219.scr.msk.p1.Contig4, mRNA sequence	0.000199968	15.2977
GO:0006635	fatty acid beta-oxidation	AK239600.1		Sus scrofa mRNA, clone:THY010115C09, expressed in thymus	0.000807369	49.7174
GO:0006635	fatty acid beta-oxidation	NM_214039.1	ACADM	Sus scrofa acyl-Coenzyme A dehydrogenase, C-4 to C-12 straight chain (ACADM), nuclear gene encoding mitochondrial protein, mRNA	0.000807369	49.7174
GO:0009607	response to biotic stimulus	AK230570.1	LOC100152238	Sus scrofa mRNA, clone:AMP010011B05, expressed in alveolar macrophage	0.00304022	4.14312
GO:0009607	response to biotic stimulus	AK232205.1		Sus scrofa mRNA, clone:LNG010103E07, expressed in lung	0.00304022	4.14312
GO:0009607	response to biotic stimulus	AK234533.1		Sus scrofa mRNA, clone:OVR010076H11, expressed in ovary	0.00304022	4.14312
GO:0009607	response to biotic stimulus	AK236404.1		Sus scrofa mRNA, clone:OVRM10189A09, expressed in ovary	0.00304022	4.14312
GO:0009607	response to biotic stimulus	AK239728.1		Sus scrofa mRNA, clone:THY010126C02, expressed in thymus	0.00304022	4.14312
GO:0009607	response to biotic stimulus	AY609666.1		Sus scrofa clone Clu_24219.scr.msk.p1.Contig4, mRNA sequence	0.00304022	4.14312
GO:0009607	response to biotic stimulus	EW316148		rpldo0102_g1.y1 ldo Sus scrofa cDNA 5', mRNA sequence	0.00304022	4.14312
GO:0008016	regulation of heart contraction	AK232205.1		Sus scrofa mRNA, clone:LNG010103E07, expressed in lung	0.00397886	11.4733
GO:0008016	regulation of heart contraction	BX925993		BX925993 Sus Scrofa library (scan) Sus scrofa cDNA clone scan0021.f.19 5prim, mRNA sequence	0.00397886	11.4733
GO:0008016	regulation of heart contraction	DB788903		DB788903 full-length enriched swine cDNA library, adult adrenal gland Sus scrofa cDNA clone ADR010083F11 5', mRNA sequence	0.00397886	11.4733
GO:0006091	generation of precursor metabolites and energy	AK231172.1		Sus scrofa mRNA, clone:ITT010006G12, expressed in intestine	0.0061467	3.66339
GO:0006091	generation of precursor metabolites and energy	AK231733.1		Sus scrofa mRNA, clone:LNG010017B08, expressed in lung	0.0061467	3.66339
GO:0006091	generation of precursor metabolites and energy	AK236637.1		Sus scrofa mRNA, clone:OVRM10210C08, expressed in ovary	0.0061467	3.66339
GO:0006091	generation of precursor metabolites and energy	CK453061		908745 MARC 4PIG Sus scrofa cDNA 5', mRNA sequence	0.0061467	3.66339
GO:0006091	generation of precursor metabolites and energy	CN157675		946398 MARC 4PIG Sus scrofa cDNA 5', mRNA sequence	0.0061467	3.66339
GO:0006091	generation of precursor metabolites and energy	DN111105		1110192 MARC 4PIG Sus scrofa cDNA 5', mRNA sequence	0.0061467	3.66339
GO:0006091	generation of precursor metabolites and energy	EV869069		rpbfe0138_n6.y1 bfe Sus scrofa cDNA 5', mRNA sequence	0.0061467	3.66339
GO:0008284	positive regulation of cell proliferation	AF329358.1	LAMB1	Sus scrofa laminin beta-1 chain mRNA, partial cds	0.0081774	3.48022
GO:0008284	positive regulation of cell proliferation	AY609666.1		Sus scrofa clone Clu_24219.scr.msk.p1.Contig4, mRNA sequence	0.0081774	3.48022
GO:0008284	positive regulation of cell proliferation	BX915041		BX915041 Sus Scrofa library (scan) Sus scrofa cDNA clone scan0027.c.13 5prim, mRNA sequence	0.0081774	3.48022
GO:0008284	positive regulation of cell proliferation	BX918412		BX918412 Sus Scrofa library (scan) Sus scrofa cDNA clone scan0038.i.09 5prim, mRNA sequence	0.0081774	3.48022
GO:0008284	positive regulation of cell proliferation	CN164178		994302 MARC 4PIG Sus scrofa cDNA 5', mRNA sequence	0.0081774	3.48022
GO:0008284	positive regulation of cell proliferation	DT324183		SusFleck_BF_0033_0036_5_pCNS_D01 SusFleck Backfat Sus scrofa cDNA clone 0033_0036_D01 5', mRNA sequence	0.0081774	3.48022
GO:0008284	positive regulation of cell proliferation	EW222667		rgul0130_k18.y1 gul Sus scrofa cDNA 5', mRNA sequence	0.0081774	3.48022
GO:0006895	Golgi to endosome transport	BX666658		BX666658 Sus Scrofa library (scac) Sus scrofa cDNA clone scac0025.d.07 3prim, mRNA sequence	0.0114782	16.5725
GO:0006895	Golgi to endosome transport	CK454638		915131 MARC 4PIG Sus scrofa cDNA 5', mRNA sequence	0.0114782	16.5725
GO:0022900	electron transport chain	AK231172.1		Sus scrofa mRNA, clone:ITT010006G12, expressed in intestine	0.0123048	4.28599
GO:0022900	electron transport chain	AK231733.1		Sus scrofa mRNA, clone:LNG010017B08, expressed in lung	0.0123048	4.28599
GO:0022900	electron transport chain	AK236637.1		Sus scrofa mRNA, clone:OVRM10210C08, expressed in ovary	0.0123048	4.28599
GO:0022900	electron transport chain	CN157675		946398 MARC 4PIG Sus scrofa cDNA 5', mRNA sequence	0.0123048	4.28599
GO:0022900	electron transport chain	DN111105		1110192 MARC 4PIG Sus scrofa cDNA 5', mRNA sequence	0.0123048	4.28599
GO:0006412	translation	AK236127.1		Sus scrofa mRNA, clone:OVRM10155A01, expressed in ovary	0.0123935	3.63786
GO:0006412	translation	AK238836.1		Sus scrofa mRNA, clone:THY010035H09, expressed in thymus	0.0123935	3.63786
GO:0006412	translation	DN123551		1123855 MARC 4PIG Sus scrofa cDNA 5', mRNA sequence	0.0123935	3.63786
GO:0006412	translation	DY405876		1497400 MARC 3PIG Sus scrofa cDNA 5', mRNA sequence	0.0123935	3.63786
GO:0006412	translation	EV928670		rche13_i19.y1 che Sus scrofa cDNA 5', mRNA sequence	0.0123935	3.63786
GO:0006412	translation	XM_001926121.1	LOC100157971	PREDICTED: Sus scrofa similar to mitochondrial ribosomal protein L52 (LOC100157971), mRNA	0.0123935	3.63786
GO:0009062	fatty acid catabolic process	AK239600.1		Sus scrofa mRNA, clone:THY010115C09, expressed in thymus	0.0208618	12.4294
GO:0009062	fatty acid catabolic process	NM_214039.1	ACADM	Sus scrofa acyl-Coenzyme A dehydrogenase, C-4 to C-12 straight chain (ACADM), nuclear gene encoding mitochondrial protein, mRNA	0.0208618	12.4294
GO:0006915	apoptosis	AK232555.1		Sus scrofa mRNA, clone:LVR010073A12, expressed in liver	0.0257679	2.58272
GO:0006915	apoptosis	AK235603.1		Sus scrofa mRNA, clone:OVRM10097A03, expressed in ovary	0.0257679	2.58272
GO:0006915	apoptosis	AK239887.1		Sus scrofa mRNA, clone:UTR010007G10, expressed in uterus	0.0257679	2.58272
GO:0006915	apoptosis	AY610295.1		Sus scrofa clone rcsk04_o4.y1.abd, mRNA sequence	0.0257679	2.58272
GO:0006915	apoptosis	BX924637		BX924637 Sus Scrofa library (scan) Sus scrofa cDNA clone scan0017.d.21 5prim, mRNA sequence	0.0257679	2.58272
GO:0006915	apoptosis	DN124736		1138534 MARC 4PIG Sus scrofa cDNA 5', mRNA sequence	0.0257679	2.58272
GO:0006915	apoptosis	EW328139		rpliv0112_a9.y1 liv Sus scrofa cDNA 5', mRNA sequence	0.0257679	2.58272
GO:0006915	apoptosis	EW421594		rnca11b_e13.y1 nca Sus scrofa cDNA 5', mRNA sequence	0.0257679	2.58272
GO:0016054	organic acid catabolic process	AK239600.1		Sus scrofa mRNA, clone:THY010115C09, expressed in thymus	0.0264678	11.0483
GO:0016054	organic acid catabolic process	NM_214039.1	ACADM	Sus scrofa acyl-Coenzyme A dehydrogenase, C-4 to C-12 straight chain (ACADM), nuclear gene encoding mitochondrial protein, mRNA	0.0264678	11.0483
GO:0019395	fatty acid oxidation	AK239600.1		Sus scrofa mRNA, clone:THY010115C09, expressed in thymus	0.0264678	11.0483
GO:0019395	fatty acid oxidation	NM_214039.1	ACADM	Sus scrofa acyl-Coenzyme A dehydrogenase, C-4 to C-12 straight chain (ACADM), nuclear gene encoding mitochondrial protein, mRNA	0.0264678	11.0483
GO:0030262	apoptotic nuclear changes	AK232555.1		Sus scrofa mRNA, clone:LVR010073A12, expressed in liver	0.0264678	11.0483
GO:0030262	apoptotic nuclear changes	EW421594		rnca11b_e13.y1 nca Sus scrofa cDNA 5', mRNA sequence	0.0264678	11.0483
GO:0034440	lipid oxidation	AK239600.1		Sus scrofa mRNA, clone:THY010115C09, expressed in thymus	0.0264678	11.0483
GO:0034440	lipid oxidation	NM_214039.1	ACADM	Sus scrofa acyl-Coenzyme A dehydrogenase, C-4 to C-12 straight chain (ACADM), nuclear gene encoding mitochondrial protein, mRNA	0.0264678	11.0483
GO:0046395	carboxylic acid catabolic process	AK239600.1		Sus scrofa mRNA, clone:THY010115C09, expressed in thymus	0.0264678	11.0483
GO:0046395	carboxylic acid catabolic process	NM_214039.1	ACADM	Sus scrofa acyl-Coenzyme A dehydrogenase, C-4 to C-12 straight chain (ACADM), nuclear gene encoding mitochondrial protein, mRNA	0.0264678	11.0483
GO:0012501	programmed cell death	AK232555.1		Sus scrofa mRNA, clone:LVR010073A12, expressed in liver	0.0286685	2.53337
GO:0012501	programmed cell death	AK235603.1		Sus scrofa mRNA, clone:OVRM10097A03, expressed in ovary	0.0286685	2.53337
GO:0012501	programmed cell death	AK239887.1		Sus scrofa mRNA, clone:UTR010007G10, expressed in uterus	0.0286685	2.53337
GO:0012501	programmed cell death	AY610295.1		Sus scrofa clone rcsk04_o4.y1.abd, mRNA sequence	0.0286685	2.53337
GO:0012501	programmed cell death	BX924637		BX924637 Sus Scrofa library (scan) Sus scrofa cDNA clone scan0017.d.21 5prim, mRNA sequence	0.0286685	2.53337
GO:0012501	programmed cell death	DN124736		1138534 MARC 4PIG Sus scrofa cDNA 5', mRNA sequence	0.0286685	2.53337
GO:0012501	programmed cell death	EW328139		rpliv0112_a9.y1 liv Sus scrofa cDNA 5', mRNA sequence	0.0286685	2.53337
GO:0012501	programmed cell death	EW421594		rnca11b_e13.y1 nca Sus scrofa cDNA 5', mRNA sequence	0.0286685	2.53337
GO:0002831	regulation of response to biotic stimulus	CK454638		915131 MARC 4PIG Sus scrofa cDNA 5', mRNA sequence	0.0402273	49.7174
GO:0018208	peptidyl-proline modification	EW290234		rjej38b_p21.y1 jej Sus scrofa cDNA 5', mRNA sequence	0.0402273	49.7174
GO:0018401	peptidyl-proline hydroxylation to 4-hydroxy-L-proline	EW290234		rjej38b_p21.y1 jej Sus scrofa cDNA 5', mRNA sequence	0.0402273	49.7174
GO:0019471	4-hydroxyproline metabolic process	EW290234		rjej38b_p21.y1 jej Sus scrofa cDNA 5', mRNA sequence	0.0402273	49.7174
GO:0019511	peptidyl-proline hydroxylation	EW290234		rjej38b_p21.y1 jej Sus scrofa cDNA 5', mRNA sequence	0.0402273	49.7174
GO:0030970	retrograde protein transport, ER to cytosol	AY609666.1		Sus scrofa clone Clu_24219.scr.msk.p1.Contig4, mRNA sequence	0.0402273	49.7174
GO:0032673	regulation of interleukin-4 production	CN164178		994302 MARC 4PIG Sus scrofa cDNA 5', mRNA sequence	0.0402273	49.7174
GO:0043900	regulation of multi-organism process	CK454638		915131 MARC 4PIG Sus scrofa cDNA 5', mRNA sequence	0.0402273	49.7174
GO:0045402	regulation of interleukin-4 biosynthetic process	CN164178		994302 MARC 4PIG Sus scrofa cDNA 5', mRNA sequence	0.0402273	49.7174
GO:0045404	positive regulation of interleukin-4 biosynthetic process	CN164178		994302 MARC 4PIG Sus scrofa cDNA 5', mRNA sequence	0.0402273	49.7174
GO:0050688	regulation of defense response to virus	CK454638		915131 MARC 4PIG Sus scrofa cDNA 5', mRNA sequence	0.0402273	49.7174
GO:0050690	regulation of defense response to virus by virus	CK454638		915131 MARC 4PIG Sus scrofa cDNA 5', mRNA sequence	0.0402273	49.7174
GO:0051252	regulation of RNA metabolic process	AK230581.1	----	Sus scrofa mRNA, clone:AMP010011G04, expressed in alveolar macrophage	0.0416784	0.481358
GO:0051252	regulation of RNA metabolic process	AK240510.1		Sus scrofa mRNA, clone:UTR010085G05, expressed in uterus	0.0416784	0.481358
GO:0051252	regulation of RNA metabolic process	AY820766.1	LOC654291	Sus scrofa SCL2A4RG-like mRNA, partial cds	0.0416784	0.481358
GO:0051252	regulation of RNA metabolic process	BX664960		BX664960 Sus Scrofa library (scag) Sus scrofa cDNA clone scag0008.d.11 3prim, mRNA sequence	0.0416784	0.481358
GO:0051252	regulation of RNA metabolic process	CK457656		921976 MARC 4PIG Sus scrofa cDNA 3', mRNA sequence	0.0416784	0.481358
GO:0051252	regulation of RNA metabolic process	EW421594		rnca11b_e13.y1 nca Sus scrofa cDNA 5', mRNA sequence	0.0416784	0.481358
GO:0051252	regulation of RNA metabolic process	NM_001044545.1	PLAGL1	Sus scrofa pleiomorphic adenoma gene-like 1 (PLAGL1), mRNA	0.0416784	0.481358
GO:0002376	immune system process	CN164178		994302 MARC 4PIG Sus scrofa cDNA 5', mRNA sequence	0.0437709	0.273925
GO:0002376	immune system process	NM_001113706.1	SLA-DRA	Sus scrofa MHC class II DR-alpha (SLA-DRA), mRNA	0.0437709	0.273925
GO:0008219	cell death	AK232555.1		Sus scrofa mRNA, clone:LVR010073A12, expressed in liver	0.0454052	2.32596
GO:0008219	cell death	AK235603.1		Sus scrofa mRNA, clone:OVRM10097A03, expressed in ovary	0.0454052	2.32596
GO:0008219	cell death	AK239887.1		Sus scrofa mRNA, clone:UTR010007G10, expressed in uterus	0.0454052	2.32596
GO:0008219	cell death	AY610295.1		Sus scrofa clone rcsk04_o4.y1.abd, mRNA sequence	0.0454052	2.32596
GO:0008219	cell death	BX924637		BX924637 Sus Scrofa library (scan) Sus scrofa cDNA clone scan0017.d.21 5prim, mRNA sequence	0.0454052	2.32596
GO:0008219	cell death	DN124736		1138534 MARC 4PIG Sus scrofa cDNA 5', mRNA sequence	0.0454052	2.32596
GO:0008219	cell death	EW328139		rpliv0112_a9.y1 liv Sus scrofa cDNA 5', mRNA sequence	0.0454052	2.32596
GO:0008219	cell death	EW421594		rnca11b_e13.y1 nca Sus scrofa cDNA 5', mRNA sequence	0.0454052	2.32596
GO:0016265	death	AK232555.1		Sus scrofa mRNA, clone:LVR010073A12, expressed in liver	0.0454052	2.32596
GO:0016265	death	AK235603.1		Sus scrofa mRNA, clone:OVRM10097A03, expressed in ovary	0.0454052	2.32596
GO:0016265	death	AK239887.1		Sus scrofa mRNA, clone:UTR010007G10, expressed in uterus	0.0454052	2.32596
GO:0016265	death	AY610295.1		Sus scrofa clone rcsk04_o4.y1.abd, mRNA sequence	0.0454052	2.32596
GO:0016265	death	BX924637		BX924637 Sus Scrofa library (scan) Sus scrofa cDNA clone scan0017.d.21 5prim, mRNA sequence	0.0454052	2.32596
GO:0016265	death	DN124736		1138534 MARC 4PIG Sus scrofa cDNA 5', mRNA sequence	0.0454052	2.32596
GO:0016265	death	EW328139		rpliv0112_a9.y1 liv Sus scrofa cDNA 5', mRNA sequence	0.0454052	2.32596
GO:0016265	death	EW421594		rnca11b_e13.y1 nca Sus scrofa cDNA 5', mRNA sequence	0.0454052	2.32596
GO:0005977	glycogen metabolic process	CK453061		908745 MARC 4PIG Sus scrofa cDNA 5', mRNA sequence	0.046632	8.28624
GO:0005977	glycogen metabolic process	EV869069		rpbfe0138_n6.y1 bfe Sus scrofa cDNA 5', mRNA sequence	0.046632	8.28624
GO:0050679	positive regulation of epithelial cell proliferation	AF329358.1	LAMB1	Sus scrofa laminin beta-1 chain mRNA, partial cds	0.046632	8.28624
GO:0050679	positive regulation of epithelial cell proliferation	DT324183		SusFleck_BF_0033_0036_5_pCNS_D01 SusFleck Backfat Sus scrofa cDNA clone 0033_0036_D01 5', mRNA sequence	0.046632	8.28624
GO:0006364	rRNA processing	AK233966.1		Sus scrofa mRNA, clone:MLN010082C02, expressed in mesenteric lymph node	0.0478964	4.81137
GO:0006364	rRNA processing	AY610143.1		Sus scrofa clone Clu_7951.scr.msk.p1.Contig1, mRNA sequence	0.0478964	4.81137
GO:0006364	rRNA processing	XM_001927898.1	LOC100157624	PREDICTED: Sus scrofa similar to TSR2, 20S rRNA accumulation, homolog (S. cerevisiae) (LOC100157624), mRNA	0.0478964	4.81137
GO:0006355	regulation of transcription, DNA-dependent	AK230581.1	----	Sus scrofa mRNA, clone:AMP010011G04, expressed in alveolar macrophage	0.0480173	0.489483
GO:0006355	regulation of transcription, DNA-dependent	AK240510.1		Sus scrofa mRNA, clone:UTR010085G05, expressed in uterus	0.0480173	0.489483
GO:0006355	regulation of transcription, DNA-dependent	AY820766.1	LOC654291	Sus scrofa SCL2A4RG-like mRNA, partial cds	0.0480173	0.489483
GO:0006355	regulation of transcription, DNA-dependent	BX664960		BX664960 Sus Scrofa library (scag) Sus scrofa cDNA clone scag0008.d.11 3prim, mRNA sequence	0.0480173	0.489483
GO:0006355	regulation of transcription, DNA-dependent	CK457656		921976 MARC 4PIG Sus scrofa cDNA 3', mRNA sequence	0.0480173	0.489483
GO:0006355	regulation of transcription, DNA-dependent	EW421594		rnca11b_e13.y1 nca Sus scrofa cDNA 5', mRNA sequence	0.0480173	0.489483
GO:0006355	regulation of transcription, DNA-dependent	NM_001044545.1	PLAGL1	Sus scrofa pleiomorphic adenoma gene-like 1 (PLAGL1), mRNA	0.0480173	0.489483
GO:0016072	rRNA metabolic process	AK233966.1		Sus scrofa mRNA, clone:MLN010082C02, expressed in mesenteric lymph node	0.0520819	4.66101
GO:0016072	rRNA metabolic process	AY610143.1		Sus scrofa clone Clu_7951.scr.msk.p1.Contig1, mRNA sequence	0.0520819	4.66101
GO:0016072	rRNA metabolic process	XM_001927898.1	LOC100157624	PREDICTED: Sus scrofa similar to TSR2, 20S rRNA accumulation, homolog (S. cerevisiae) (LOC100157624), mRNA	0.0520819	4.66101
GO:0006112	energy reserve metabolic process	CK453061		908745 MARC 4PIG Sus scrofa cDNA 5', mRNA sequence	0.0543871	7.64884
GO:0006112	energy reserve metabolic process	EV869069		rpbfe0138_n6.y1 bfe Sus scrofa cDNA 5', mRNA sequence	0.0543871	7.64884
GO:0051346	negative regulation of hydrolase activity	AK239728.1		Sus scrofa mRNA, clone:THY010126C02, expressed in thymus	0.0543871	7.64884
GO:0051346	negative regulation of hydrolase activity	NM_001097486.1	ATPIF1	Sus scrofa ATPase inhibitory factor 1 (ATPIF1), nuclear gene encoding mitochondrial protein, mRNA	0.0543871	7.64884
GO:0034960	cellular biopolymer metabolic process	AJ950507		AJ950507 KN404_1 Sus scrofa cDNA clone C0007741i12 5', mRNA sequence	0.0608736	1.54271
GO:0034960	cellular biopolymer metabolic process	AK232555.1		Sus scrofa mRNA, clone:LVR010073A12, expressed in liver	0.0608736	1.54271
GO:0034960	cellular biopolymer metabolic process	AK233966.1		Sus scrofa mRNA, clone:MLN010082C02, expressed in mesenteric lymph node	0.0608736	1.54271
GO:0034960	cellular biopolymer metabolic process	AK234932.1		Sus scrofa mRNA, clone:OVRM10033G12, expressed in ovary	0.0608736	1.54271
GO:0034960	cellular biopolymer metabolic process	AK236127.1		Sus scrofa mRNA, clone:OVRM10155A01, expressed in ovary	0.0608736	1.54271
GO:0034960	cellular biopolymer metabolic process	AK236404.1		Sus scrofa mRNA, clone:OVRM10189A09, expressed in ovary	0.0608736	1.54271
GO:0034960	cellular biopolymer metabolic process	AK238836.1		Sus scrofa mRNA, clone:THY010035H09, expressed in thymus	0.0608736	1.54271
GO:0034960	cellular biopolymer metabolic process	AY609798.1		Sus scrofa clone Clu_3164.scr.msk.p1.Contig1, mRNA sequence	0.0608736	1.54271
GO:0034960	cellular biopolymer metabolic process	AY610143.1		Sus scrofa clone Clu_7951.scr.msk.p1.Contig1, mRNA sequence	0.0608736	1.54271
GO:0034960	cellular biopolymer metabolic process	BI182307		UNL-P-FN-bg-h-08-0-UNL.s1 UNL-P-FN Sus scrofa cDNA clone UNL-P-FN-bg-h-08-0-UNL 3', mRNA sequence	0.0608736	1.54271
GO:0034960	cellular biopolymer metabolic process	BX664880		BX664880 Sus Scrofa library (scag) Sus scrofa cDNA clone scag0005.d.07 5prim, mRNA sequence	0.0608736	1.54271
GO:0034960	cellular biopolymer metabolic process	BX918412		BX918412 Sus Scrofa library (scan) Sus scrofa cDNA clone scan0038.i.09 5prim, mRNA sequence	0.0608736	1.54271
GO:0034960	cellular biopolymer metabolic process	CK453061		908745 MARC 4PIG Sus scrofa cDNA 5', mRNA sequence	0.0608736	1.54271
GO:0034960	cellular biopolymer metabolic process	CK457656		921976 MARC 4PIG Sus scrofa cDNA 3', mRNA sequence	0.0608736	1.54271
GO:0034960	cellular biopolymer metabolic process	CN164178		994302 MARC 4PIG Sus scrofa cDNA 5', mRNA sequence	0.0608736	1.54271
GO:0034960	cellular biopolymer metabolic process	DN123551		1123855 MARC 4PIG Sus scrofa cDNA 5', mRNA sequence	0.0608736	1.54271
GO:0034960	cellular biopolymer metabolic process	DY405876		1497400 MARC 3PIG Sus scrofa cDNA 5', mRNA sequence	0.0608736	1.54271
GO:0034960	cellular biopolymer metabolic process	EV869069		rpbfe0138_n6.y1 bfe Sus scrofa cDNA 5', mRNA sequence	0.0608736	1.54271
GO:0034960	cellular biopolymer metabolic process	EV928670		rche13_i19.y1 che Sus scrofa cDNA 5', mRNA sequence	0.0608736	1.54271
GO:0034960	cellular biopolymer metabolic process	XM_001926121.1	LOC100157971	PREDICTED: Sus scrofa similar to mitochondrial ribosomal protein L52 (LOC100157971), mRNA	0.0608736	1.54271
GO:0034960	cellular biopolymer metabolic process	XM_001927898.1	LOC100157624	PREDICTED: Sus scrofa similar to TSR2, 20S rRNA accumulation, homolog (S. cerevisiae) (LOC100157624), mRNA	0.0608736	1.54271
GO:0034960	cellular biopolymer metabolic process	XM_001929236.1	LOC100157075	PREDICTED: Sus scrofa similar to snurportin 1 (LOC100157075), mRNA	0.0608736	1.54271
GO:0006073	glucan metabolic process	CK453061		908745 MARC 4PIG Sus scrofa cDNA 5', mRNA sequence	0.0626202	7.10249
GO:0006073	glucan metabolic process	EV869069		rpbfe0138_n6.y1 bfe Sus scrofa cDNA 5', mRNA sequence	0.0626202	7.10249
GO:0006892	post-Golgi vesicle-mediated transport	BX666658		BX666658 Sus Scrofa library (scac) Sus scrofa cDNA clone scac0025.d.07 3prim, mRNA sequence	0.0626202	7.10249
GO:0006892	post-Golgi vesicle-mediated transport	CK454638		915131 MARC 4PIG Sus scrofa cDNA 5', mRNA sequence	0.0626202	7.10249
GO:0009056	catabolic process	AK232555.1		Sus scrofa mRNA, clone:LVR010073A12, expressed in liver	0.0690094	1.72716
GO:0009056	catabolic process	AK235390.1		Sus scrofa mRNA, clone:OVRM10075G05, expressed in ovary	0.0690094	1.72716
GO:0009056	catabolic process	AK236127.1		Sus scrofa mRNA, clone:OVRM10155A01, expressed in ovary	0.0690094	1.72716
GO:0009056	catabolic process	AK236389	EPHX1	Sus scrofa mRNA, clone:OVRM10187H12, expressed in ovary	0.0690094	1.72716
GO:0009056	catabolic process	AK239600.1		Sus scrofa mRNA, clone:THY010115C09, expressed in thymus	0.0690094	1.72716
GO:0009056	catabolic process	AY609666.1		Sus scrofa clone Clu_24219.scr.msk.p1.Contig4, mRNA sequence	0.0690094	1.72716
GO:0009056	catabolic process	AY610143.1		Sus scrofa clone Clu_7951.scr.msk.p1.Contig1, mRNA sequence	0.0690094	1.72716
GO:0009056	catabolic process	AY610411.1	TPRKB	Sus scrofa clone risp02_p18.y1.abd, mRNA sequence	0.0690094	1.72716
GO:0009056	catabolic process	BX664880		BX664880 Sus Scrofa library (scag) Sus scrofa cDNA clone scag0005.d.07 5prim, mRNA sequence	0.0690094	1.72716
GO:0009056	catabolic process	BX915041		BX915041 Sus Scrofa library (scan) Sus scrofa cDNA clone scan0027.c.13 5prim, mRNA sequence	0.0690094	1.72716
GO:0009056	catabolic process	CJ012192		CJ012192 full-length enriched swine cDNA library, adult mesenteric lymph node Sus scrofa cDNA clone MLN01B080058 5', mRNA sequence	0.0690094	1.72716
GO:0009056	catabolic process	DY406584		1498188 MARC 3PIG Sus scrofa cDNA 5', mRNA sequence	0.0690094	1.72716
GO:0009056	catabolic process	NM_214039.1	ACADM	Sus scrofa acyl-Coenzyme A dehydrogenase, C-4 to C-12 straight chain (ACADM), nuclear gene encoding mitochondrial protein, mRNA	0.0690094	1.72716
GO:0009056	catabolic process	NM_214052.1	PLCD4	Sus scrofa phospholipase C, delta 4 (PLCD4), mRNA	0.0690094	1.72716
GO:0000768	syncytium formation by plasma membrane fusion	BX925993		BX925993 Sus Scrofa library (scan) Sus scrofa cDNA clone scan0021.f.19 5prim, mRNA sequence	0.0796473	24.8587
GO:0007520	myoblast fusion	BX925993		BX925993 Sus Scrofa library (scan) Sus scrofa cDNA clone scan0021.f.19 5prim, mRNA sequence	0.0796473	24.8587
GO:0008054	cyclin catabolic process	BX915041		BX915041 Sus Scrofa library (scan) Sus scrofa cDNA clone scan0027.c.13 5prim, mRNA sequence	0.0796473	24.8587
GO:0009950	dorsal/ventral axis specification	BX923538		BX923538 Sus Scrofa library (scan) Sus scrofa cDNA clone scan0014.h.08 5prim, mRNA sequence	0.0796473	24.8587
GO:0022617	extracellular matrix disassembly	DT324183		SusFleck_BF_0033_0036_5_pCNS_D01 SusFleck Backfat Sus scrofa cDNA clone 0033_0036_D01 5', mRNA sequence	0.0796473	24.8587
GO:0031581	hemidesmosome assembly	DT324183		SusFleck_BF_0033_0036_5_pCNS_D01 SusFleck Backfat Sus scrofa cDNA clone 0033_0036_D01 5', mRNA sequence	0.0796473	24.8587
GO:0042104	positive regulation of activated T cell proliferation	CN164178		994302 MARC 4PIG Sus scrofa cDNA 5', mRNA sequence	0.0796473	24.8587
GO:0046006	regulation of activated T cell proliferation	CN164178		994302 MARC 4PIG Sus scrofa cDNA 5', mRNA sequence	0.0796473	24.8587
GO:0005976	polysaccharide metabolic process	CK453061		908745 MARC 4PIG Sus scrofa cDNA 5', mRNA sequence	0.0804317	6.21468
GO:0005976	polysaccharide metabolic process	EV869069		rpbfe0138_n6.y1 bfe Sus scrofa cDNA 5', mRNA sequence	0.0804317	6.21468
GO:0030258	lipid modification	AK239600.1		Sus scrofa mRNA, clone:THY010115C09, expressed in thymus	0.0804317	6.21468
GO:0030258	lipid modification	NM_214039.1	ACADM	Sus scrofa acyl-Coenzyme A dehydrogenase, C-4 to C-12 straight chain (ACADM), nuclear gene encoding mitochondrial protein, mRNA	0.0804317	6.21468
GO:0044264	cellular polysaccharide metabolic process	CK453061		908745 MARC 4PIG Sus scrofa cDNA 5', mRNA sequence	0.0804317	6.21468
GO:0044264	cellular polysaccharide metabolic process	EV869069		rpbfe0138_n6.y1 bfe Sus scrofa cDNA 5', mRNA sequence	0.0804317	6.21468
GO:0006310	DNA recombination	AJ950507		AJ950507 KN404_1 Sus scrofa cDNA clone C0007741i12 5', mRNA sequence	0.0866419	3.82442
GO:0006310	DNA recombination	BX664880		BX664880 Sus Scrofa library (scag) Sus scrofa cDNA clone scag0005.d.07 5prim, mRNA sequence	0.0866419	3.82442
GO:0006310	DNA recombination	CN164178		994302 MARC 4PIG Sus scrofa cDNA 5', mRNA sequence	0.0866419	3.82442
GO:0007049	cell cycle	AJ950507		AJ950507 KN404_1 Sus scrofa cDNA clone C0007741i12 5', mRNA sequence	0.0891627	0.313675
GO:0007049	cell cycle	BX915041		BX915041 Sus Scrofa library (scan) Sus scrofa cDNA clone scan0027.c.13 5prim, mRNA sequence	0.0891627	0.313675
GO:0044242	cellular lipid catabolic process	AK239600.1		Sus scrofa mRNA, clone:THY010115C09, expressed in thymus	0.0899676	5.84911
GO:0044242	cellular lipid catabolic process	NM_214039.1	ACADM	Sus scrofa acyl-Coenzyme A dehydrogenase, C-4 to C-12 straight chain (ACADM), nuclear gene encoding mitochondrial protein, mRNA	0.0899676	5.84911
GO:0016042	lipid catabolic process	AK239600.1		Sus scrofa mRNA, clone:THY010115C09, expressed in thymus	0.0981687	3.63786
GO:0016042	lipid catabolic process	NM_214039.1	ACADM	Sus scrofa acyl-Coenzyme A dehydrogenase, C-4 to C-12 straight chain (ACADM), nuclear gene encoding mitochondrial protein, mRNA	0.0981687	3.63786
GO:0016042	lipid catabolic process	NM_214052.1	PLCD4	Sus scrofa phospholipase C, delta 4 (PLCD4), mRNA	0.0981687	3.63786
GO:0006401	RNA catabolic process	AK236127.1		Sus scrofa mRNA, clone:OVRM10155A01, expressed in ovary	0.0998965	5.52416
GO:0006401	RNA catabolic process	AY610143.1		Sus scrofa clone Clu_7951.scr.msk.p1.Contig1, mRNA sequence	0.0998965	5.52416
GO:0008629	induction of apoptosis by intracellular signals	AK232555.1		Sus scrofa mRNA, clone:LVR010073A12, expressed in liver	0.0998965	5.52416
GO:0008629	induction of apoptosis by intracellular signals	BX915041		BX915041 Sus Scrofa library (scan) Sus scrofa cDNA clone scan0027.c.13 5prim, mRNA sequence	0.0998965	5.52416
GO:0050678	regulation of epithelial cell proliferation	AF329358.1	LAMB1	Sus scrofa laminin beta-1 chain mRNA, partial cds	0.0998965	5.52416
GO:0050678	regulation of epithelial cell proliferation	DT324183		SusFleck_BF_0033_0036_5_pCNS_D01 SusFleck Backfat Sus scrofa cDNA clone 0033_0036_D01 5', mRNA sequence	0.0998965	5.52416
GO:0019222	regulation of metabolic process	AK230581.1	----	Sus scrofa mRNA, clone:AMP010011G04, expressed in alveolar macrophage	0.100127	0.636775
GO:0019222	regulation of metabolic process	AK234633.1		Sus scrofa mRNA, clone:OVR010100E10, expressed in ovary	0.100127	0.636775
GO:0019222	regulation of metabolic process	AK240510.1		Sus scrofa mRNA, clone:UTR010085G05, expressed in uterus	0.100127	0.636775
GO:0019222	regulation of metabolic process	AY820766.1	LOC654291	Sus scrofa SCL2A4RG-like mRNA, partial cds	0.100127	0.636775
GO:0019222	regulation of metabolic process	BX664960		BX664960 Sus Scrofa library (scag) Sus scrofa cDNA clone scag0008.d.11 3prim, mRNA sequence	0.100127	0.636775
GO:0019222	regulation of metabolic process	CK457656		921976 MARC 4PIG Sus scrofa cDNA 3', mRNA sequence	0.100127	0.636775
GO:0019222	regulation of metabolic process	CK467405		938702 MARC 4PIG Sus scrofa cDNA 5', mRNA sequence	0.100127	0.636775
GO:0019222	regulation of metabolic process	CN164178		994302 MARC 4PIG Sus scrofa cDNA 5', mRNA sequence	0.100127	0.636775
GO:0019222	regulation of metabolic process	DN121268		1121355 MARC 4PIG Sus scrofa cDNA 3', mRNA sequence	0.100127	0.636775
GO:0019222	regulation of metabolic process	EW316148		rpldo0102_g1.y1 ldo Sus scrofa cDNA 5', mRNA sequence	0.100127	0.636775
GO:0019222	regulation of metabolic process	EW421594		rnca11b_e13.y1 nca Sus scrofa cDNA 5', mRNA sequence	0.100127	0.636775
GO:0019222	regulation of metabolic process	EW464984		rnmm24c_m17.y1 nmm Sus scrofa cDNA 5', mRNA sequence	0.100127	0.636775
GO:0019222	regulation of metabolic process	NM_001044545.1	PLAGL1	Sus scrofa pleiomorphic adenoma gene-like 1 (PLAGL1), mRNA	0.100127	0.636775
GO:0031323	regulation of cellular metabolic process	AK230581.1	----	Sus scrofa mRNA, clone:AMP010011G04, expressed in alveolar macrophage	0.106562	0.641197
GO:0031323	regulation of cellular metabolic process	AK234633.1		Sus scrofa mRNA, clone:OVR010100E10, expressed in ovary	0.106562	0.641197
GO:0031323	regulation of cellular metabolic process	AK240510.1		Sus scrofa mRNA, clone:UTR010085G05, expressed in uterus	0.106562	0.641197
GO:0031323	regulation of cellular metabolic process	AY820766.1	LOC654291	Sus scrofa SCL2A4RG-like mRNA, partial cds	0.106562	0.641197
GO:0031323	regulation of cellular metabolic process	BX664960		BX664960 Sus Scrofa library (scag) Sus scrofa cDNA clone scag0008.d.11 3prim, mRNA sequence	0.106562	0.641197
GO:0031323	regulation of cellular metabolic process	CK457656		921976 MARC 4PIG Sus scrofa cDNA 3', mRNA sequence	0.106562	0.641197
GO:0031323	regulation of cellular metabolic process	CK467405		938702 MARC 4PIG Sus scrofa cDNA 5', mRNA sequence	0.106562	0.641197
GO:0031323	regulation of cellular metabolic process	CN164178		994302 MARC 4PIG Sus scrofa cDNA 5', mRNA sequence	0.106562	0.641197
GO:0031323	regulation of cellular metabolic process	DN121268		1121355 MARC 4PIG Sus scrofa cDNA 3', mRNA sequence	0.106562	0.641197
GO:0031323	regulation of cellular metabolic process	EW316148		rpldo0102_g1.y1 ldo Sus scrofa cDNA 5', mRNA sequence	0.106562	0.641197
GO:0031323	regulation of cellular metabolic process	EW421594		rnca11b_e13.y1 nca Sus scrofa cDNA 5', mRNA sequence	0.106562	0.641197
GO:0031323	regulation of cellular metabolic process	EW464984		rnmm24c_m17.y1 nmm Sus scrofa cDNA 5', mRNA sequence	0.106562	0.641197
GO:0031323	regulation of cellular metabolic process	NM_001044545.1	PLAGL1	Sus scrofa pleiomorphic adenoma gene-like 1 (PLAGL1), mRNA	0.106562	0.641197
GO:0042127	regulation of cell proliferation	AF329358.1	LAMB1	Sus scrofa laminin beta-1 chain mRNA, partial cds	0.109593	1.9497
GO:0042127	regulation of cell proliferation	AY609666.1		Sus scrofa clone Clu_24219.scr.msk.p1.Contig4, mRNA sequence	0.109593	1.9497
GO:0042127	regulation of cell proliferation	BX915041		BX915041 Sus Scrofa library (scan) Sus scrofa cDNA clone scan0027.c.13 5prim, mRNA sequence	0.109593	1.9497
GO:0042127	regulation of cell proliferation	BX918412		BX918412 Sus Scrofa library (scan) Sus scrofa cDNA clone scan0038.i.09 5prim, mRNA sequence	0.109593	1.9497
GO:0042127	regulation of cell proliferation	CN164178		994302 MARC 4PIG Sus scrofa cDNA 5', mRNA sequence	0.109593	1.9497
GO:0042127	regulation of cell proliferation	DT324183		SusFleck_BF_0033_0036_5_pCNS_D01 SusFleck Backfat Sus scrofa cDNA clone 0033_0036_D01 5', mRNA sequence	0.109593	1.9497
GO:0042127	regulation of cell proliferation	EW222667		rgul0130_k18.y1 gul Sus scrofa cDNA 5', mRNA sequence	0.109593	1.9497
GO:0042127	regulation of cell proliferation	NM_001097486.1	ATPIF1	Sus scrofa ATPase inhibitory factor 1 (ATPIF1), nuclear gene encoding mitochondrial protein, mRNA	0.109593	1.9497
GO:0003008	system process	AK239436.1		Sus scrofa mRNA, clone:THY010103G12, expressed in thymus	0.117359	1.92145
GO:0003008	system process	AK240563.1		Sus scrofa mRNA, clone:UTR010098F11, expressed in uterus	0.117359	1.92145
GO:0003008	system process	BX925993		BX925993 Sus Scrofa library (scan) Sus scrofa cDNA clone scan0021.f.19 5prim, mRNA sequence	0.117359	1.92145
GO:0003008	system process	CK454645		915140 MARC 4PIG Sus scrofa cDNA 5', mRNA sequence	0.117359	1.92145
GO:0003008	system process	CN163858		993962 MARC 4PIG Sus scrofa cDNA 5', mRNA sequence	0.117359	1.92145
GO:0003008	system process	DV904076		POSM0605028_M02R porcine skeletal muscle cDNA library (PoSM) Sus scrofa cDNA 3', mRNA sequence	0.117359	1.92145
GO:0003008	system process	EW055180		rpigcb_10659.y1 cty Sus scrofa cDNA 5', mRNA sequence	0.117359	1.92145
GO:0003008	system process	NM_213855.1	MYH7	Sus scrofa myosin, heavy chain 7, cardiac muscle, beta (MYH7), mRNA	0.117359	1.92145
GO:0006949	syncytium formation	BX925993		BX925993 Sus Scrofa library (scan) Sus scrofa cDNA clone scan0021.f.19 5prim, mRNA sequence	0.118276	16.5725
GO:0019363	pyridine nucleotide biosynthetic process	AY214329.1	LOC403161	Sus scrofa nicotinate phosphoribosyltransferase-like protein mRNA, partial cds	0.118276	16.5725
GO:0060255	regulation of macromolecule metabolic process	AK230581.1	----	Sus scrofa mRNA, clone:AMP010011G04, expressed in alveolar macrophage	0.121559	0.650883
GO:0060255	regulation of macromolecule metabolic process	AK234633.1		Sus scrofa mRNA, clone:OVR010100E10, expressed in ovary	0.121559	0.650883
GO:0060255	regulation of macromolecule metabolic process	AK240510.1		Sus scrofa mRNA, clone:UTR010085G05, expressed in uterus	0.121559	0.650883
GO:0060255	regulation of macromolecule metabolic process	AY820766.1	LOC654291	Sus scrofa SCL2A4RG-like mRNA, partial cds	0.121559	0.650883
GO:0060255	regulation of macromolecule metabolic process	BX664960		BX664960 Sus Scrofa library (scag) Sus scrofa cDNA clone scag0008.d.11 3prim, mRNA sequence	0.121559	0.650883
GO:0060255	regulation of macromolecule metabolic process	CK457656		921976 MARC 4PIG Sus scrofa cDNA 3', mRNA sequence	0.121559	0.650883
GO:0060255	regulation of macromolecule metabolic process	CK467405		938702 MARC 4PIG Sus scrofa cDNA 5', mRNA sequence	0.121559	0.650883
GO:0060255	regulation of macromolecule metabolic process	CN164178		994302 MARC 4PIG Sus scrofa cDNA 5', mRNA sequence	0.121559	0.650883
GO:0060255	regulation of macromolecule metabolic process	DN121268		1121355 MARC 4PIG Sus scrofa cDNA 3', mRNA sequence	0.121559	0.650883
GO:0060255	regulation of macromolecule metabolic process	EW316148		rpldo0102_g1.y1 ldo Sus scrofa cDNA 5', mRNA sequence	0.121559	0.650883
GO:0060255	regulation of macromolecule metabolic process	EW421594		rnca11b_e13.y1 nca Sus scrofa cDNA 5', mRNA sequence	0.121559	0.650883
GO:0060255	regulation of macromolecule metabolic process	EW464984		rnmm24c_m17.y1 nmm Sus scrofa cDNA 5', mRNA sequence	0.121559	0.650883
GO:0060255	regulation of macromolecule metabolic process	NM_001044545.1	PLAGL1	Sus scrofa pleiomorphic adenoma gene-like 1 (PLAGL1), mRNA	0.121559	0.650883
GO:0009605	response to external stimulus	AK236127.1		Sus scrofa mRNA, clone:OVRM10155A01, expressed in ovary	0.122452	0.224966
GO:0022613	ribonucleoprotein complex biogenesis and assembly	AK233966.1		Sus scrofa mRNA, clone:MLN010082C02, expressed in mesenteric lymph node	0.13406	2.61671
GO:0022613	ribonucleoprotein complex biogenesis and assembly	AY610143.1		Sus scrofa clone Clu_7951.scr.msk.p1.Contig1, mRNA sequence	0.13406	2.61671
GO:0022613	ribonucleoprotein complex biogenesis and assembly	XM_001927898.1	LOC100157624	PREDICTED: Sus scrofa similar to TSR2, 20S rRNA accumulation, homolog (S. cerevisiae) (LOC100157624), mRNA	0.13406	2.61671
GO:0022613	ribonucleoprotein complex biogenesis and assembly	XM_001929236.1	LOC100157075	PREDICTED: Sus scrofa similar to snurportin 1 (LOC100157075), mRNA	0.13406	2.61671
GO:0042254	ribosome biogenesis	AK233966.1		Sus scrofa mRNA, clone:MLN010082C02, expressed in mesenteric lymph node	0.136921	3.17345
GO:0042254	ribosome biogenesis	AY610143.1		Sus scrofa clone Clu_7951.scr.msk.p1.Contig1, mRNA sequence	0.136921	3.17345
GO:0042254	ribosome biogenesis	XM_001927898.1	LOC100157624	PREDICTED: Sus scrofa similar to TSR2, 20S rRNA accumulation, homolog (S. cerevisiae) (LOC100157624), mRNA	0.136921	3.17345
GO:0044248	cellular catabolic process	AK232555.1		Sus scrofa mRNA, clone:LVR010073A12, expressed in liver	0.142114	1.61683
GO:0044248	cellular catabolic process	AK235390.1		Sus scrofa mRNA, clone:OVRM10075G05, expressed in ovary	0.142114	1.61683
GO:0044248	cellular catabolic process	AK236127.1		Sus scrofa mRNA, clone:OVRM10155A01, expressed in ovary	0.142114	1.61683
GO:0044248	cellular catabolic process	AK236389	EPHX1	Sus scrofa mRNA, clone:OVRM10187H12, expressed in ovary	0.142114	1.61683
GO:0044248	cellular catabolic process	AK239600.1		Sus scrofa mRNA, clone:THY010115C09, expressed in thymus	0.142114	1.61683
GO:0044248	cellular catabolic process	AY609666.1		Sus scrofa clone Clu_24219.scr.msk.p1.Contig4, mRNA sequence	0.142114	1.61683
GO:0044248	cellular catabolic process	AY610143.1		Sus scrofa clone Clu_7951.scr.msk.p1.Contig1, mRNA sequence	0.142114	1.61683
GO:0044248	cellular catabolic process	BX664880		BX664880 Sus Scrofa library (scag) Sus scrofa cDNA clone scag0005.d.07 5prim, mRNA sequence	0.142114	1.61683
GO:0044248	cellular catabolic process	BX915041		BX915041 Sus Scrofa library (scan) Sus scrofa cDNA clone scan0027.c.13 5prim, mRNA sequence	0.142114	1.61683
GO:0044248	cellular catabolic process	CJ012192		CJ012192 full-length enriched swine cDNA library, adult mesenteric lymph node Sus scrofa cDNA clone MLN01B080058 5', mRNA sequence	0.142114	1.61683
GO:0044248	cellular catabolic process	DY406584		1498188 MARC 3PIG Sus scrofa cDNA 5', mRNA sequence	0.142114	1.61683
GO:0044248	cellular catabolic process	NM_214039.1	ACADM	Sus scrofa acyl-Coenzyme A dehydrogenase, C-4 to C-12 straight chain (ACADM), nuclear gene encoding mitochondrial protein, mRNA	0.142114	1.61683
GO:0001558	regulation of cell growth	AK230581.1	----	Sus scrofa mRNA, clone:AMP010011G04, expressed in alveolar macrophage	0.14458	2.54961
GO:0001558	regulation of cell growth	AY609666.1		Sus scrofa clone Clu_24219.scr.msk.p1.Contig4, mRNA sequence	0.14458	2.54961
GO:0001558	regulation of cell growth	DV904076		POSM0605028_M02R porcine skeletal muscle cDNA library (PoSM) Sus scrofa cDNA 3', mRNA sequence	0.14458	2.54961
GO:0001558	regulation of cell growth	EW421594		rnca11b_e13.y1 nca Sus scrofa cDNA 5', mRNA sequence	0.14458	2.54961
GO:0009653	anatomical structure morphogenesis	AF329358.1	LAMB1	Sus scrofa laminin beta-1 chain mRNA, partial cds	0.145691	0.350123
GO:0009653	anatomical structure morphogenesis	DV904076		POSM0605028_M02R porcine skeletal muscle cDNA library (PoSM) Sus scrofa cDNA 3', mRNA sequence	0.145691	0.350123
GO:0009615	response to virus	AK230570.1	LOC100152238	Sus scrofa mRNA, clone:AMP010011B05, expressed in alveolar macrophage	0.151161	3.04392
GO:0009615	response to virus	AK236404.1		Sus scrofa mRNA, clone:OVRM10189A09, expressed in ovary	0.151161	3.04392
GO:0009615	response to virus	EW316148		rpldo0102_g1.y1 ldo Sus scrofa cDNA 5', mRNA sequence	0.151161	3.04392
GO:0043065	positive regulation of apoptosis	AK232555.1		Sus scrofa mRNA, clone:LVR010073A12, expressed in liver	0.151645	2.21953
GO:0043065	positive regulation of apoptosis	BX915041		BX915041 Sus Scrofa library (scan) Sus scrofa cDNA clone scan0027.c.13 5prim, mRNA sequence	0.151645	2.21953
GO:0043065	positive regulation of apoptosis	CK467405		938702 MARC 4PIG Sus scrofa cDNA 5', mRNA sequence	0.151645	2.21953
GO:0043065	positive regulation of apoptosis	EW421594		rnca11b_e13.y1 nca Sus scrofa cDNA 5', mRNA sequence	0.151645	2.21953
GO:0043065	positive regulation of apoptosis	XM_001925866.1	LOC100152572	PREDICTED: Sus scrofa similar to MLK-related kinase (LOC100152572), mRNA	0.151645	2.21953
GO:0001937	negative regulation of endothelial cell proliferation	NM_001097486.1	ATPIF1	Sus scrofa ATPase inhibitory factor 1 (ATPIF1), nuclear gene encoding mitochondrial protein, mRNA	0.156129	12.4294
GO:0006825	copper ion transport	AK232136.1		Sus scrofa mRNA, clone:LNG010086D03, expressed in lung	0.156129	12.4294
GO:0007492	endoderm development	DT324183		SusFleck_BF_0033_0036_5_pCNS_D01 SusFleck Backfat Sus scrofa cDNA clone 0033_0036_D01 5', mRNA sequence	0.156129	12.4294
GO:0010466	negative regulation of peptidase activity	AK239728.1		Sus scrofa mRNA, clone:THY010126C02, expressed in thymus	0.156129	12.4294
GO:0014902	myotube differentiation	BX925993		BX925993 Sus Scrofa library (scan) Sus scrofa cDNA clone scan0021.f.19 5prim, mRNA sequence	0.156129	12.4294
GO:0030968	endoplasmic reticulum unfolded protein response	AY609666.1		Sus scrofa clone Clu_24219.scr.msk.p1.Contig4, mRNA sequence	0.156129	12.4294
GO:0034620	cellular response to unfolded protein	AY609666.1		Sus scrofa clone Clu_24219.scr.msk.p1.Contig4, mRNA sequence	0.156129	12.4294
GO:0043154	negative regulation of caspase activity	AK239728.1		Sus scrofa mRNA, clone:THY010126C02, expressed in thymus	0.156129	12.4294
GO:0045026	plasma membrane fusion	BX925993		BX925993 Sus Scrofa library (scan) Sus scrofa cDNA clone scan0021.f.19 5prim, mRNA sequence	0.156129	12.4294
GO:0045109	intermediate filament organization	AK239728.1		Sus scrofa mRNA, clone:THY010126C02, expressed in thymus	0.156129	12.4294
GO:0019219	regulation of nucleobase, nucleoside, nucleotide and nucleic acid metabolic process	AK230581.1	----	Sus scrofa mRNA, clone:AMP010011G04, expressed in alveolar macrophage	0.157345	0.647209
GO:0019219	regulation of nucleobase, nucleoside, nucleotide and nucleic acid metabolic process	AK240510.1		Sus scrofa mRNA, clone:UTR010085G05, expressed in uterus	0.157345	0.647209
GO:0019219	regulation of nucleobase, nucleoside, nucleotide and nucleic acid metabolic process	AY820766.1	LOC654291	Sus scrofa SCL2A4RG-like mRNA, partial cds	0.157345	0.647209
GO:0019219	regulation of nucleobase, nucleoside, nucleotide and nucleic acid metabolic process	BX664960		BX664960 Sus Scrofa library (scag) Sus scrofa cDNA clone scag0008.d.11 3prim, mRNA sequence	0.157345	0.647209
GO:0019219	regulation of nucleobase, nucleoside, nucleotide and nucleic acid metabolic process	CK457656		921976 MARC 4PIG Sus scrofa cDNA 3', mRNA sequence	0.157345	0.647209
GO:0019219	regulation of nucleobase, nucleoside, nucleotide and nucleic acid metabolic process	CK467405		938702 MARC 4PIG Sus scrofa cDNA 5', mRNA sequence	0.157345	0.647209
GO:0019219	regulation of nucleobase, nucleoside, nucleotide and nucleic acid metabolic process	DN121268		1121355 MARC 4PIG Sus scrofa cDNA 3', mRNA sequence	0.157345	0.647209
GO:0019219	regulation of nucleobase, nucleoside, nucleotide and nucleic acid metabolic process	EW316148		rpldo0102_g1.y1 ldo Sus scrofa cDNA 5', mRNA sequence	0.157345	0.647209
GO:0019219	regulation of nucleobase, nucleoside, nucleotide and nucleic acid metabolic process	EW421594		rnca11b_e13.y1 nca Sus scrofa cDNA 5', mRNA sequence	0.157345	0.647209
GO:0019219	regulation of nucleobase, nucleoside, nucleotide and nucleic acid metabolic process	EW464984		rnmm24c_m17.y1 nmm Sus scrofa cDNA 5', mRNA sequence	0.157345	0.647209
GO:0019219	regulation of nucleobase, nucleoside, nucleotide and nucleic acid metabolic process	NM_001044545.1	PLAGL1	Sus scrofa pleiomorphic adenoma gene-like 1 (PLAGL1), mRNA	0.157345	0.647209
GO:0043285	biopolymer catabolic process	AK232555.1		Sus scrofa mRNA, clone:LVR010073A12, expressed in liver	0.162818	1.66279
GO:0043285	biopolymer catabolic process	AK235390.1		Sus scrofa mRNA, clone:OVRM10075G05, expressed in ovary	0.162818	1.66279
GO:0043285	biopolymer catabolic process	AK236127.1		Sus scrofa mRNA, clone:OVRM10155A01, expressed in ovary	0.162818	1.66279
GO:0043285	biopolymer catabolic process	AY609666.1		Sus scrofa clone Clu_24219.scr.msk.p1.Contig4, mRNA sequence	0.162818	1.66279
GO:0043285	biopolymer catabolic process	AY610143.1		Sus scrofa clone Clu_7951.scr.msk.p1.Contig1, mRNA sequence	0.162818	1.66279
GO:0043285	biopolymer catabolic process	AY610411.1	TPRKB	Sus scrofa clone risp02_p18.y1.abd, mRNA sequence	0.162818	1.66279
GO:0043285	biopolymer catabolic process	BX664880		BX664880 Sus Scrofa library (scag) Sus scrofa cDNA clone scag0005.d.07 5prim, mRNA sequence	0.162818	1.66279
GO:0043285	biopolymer catabolic process	BX915041		BX915041 Sus Scrofa library (scan) Sus scrofa cDNA clone scan0027.c.13 5prim, mRNA sequence	0.162818	1.66279
GO:0043285	biopolymer catabolic process	CJ012192		CJ012192 full-length enriched swine cDNA library, adult mesenteric lymph node Sus scrofa cDNA clone MLN01B080058 5', mRNA sequence	0.162818	1.66279
GO:0043285	biopolymer catabolic process	DY406584		1498188 MARC 3PIG Sus scrofa cDNA 5', mRNA sequence	0.162818	1.66279
GO:0043068	positive regulation of programmed cell death	AK232555.1		Sus scrofa mRNA, clone:LVR010073A12, expressed in liver	0.165491	2.16163
GO:0043068	positive regulation of programmed cell death	BX915041		BX915041 Sus Scrofa library (scan) Sus scrofa cDNA clone scan0027.c.13 5prim, mRNA sequence	0.165491	2.16163
GO:0043068	positive regulation of programmed cell death	CK467405		938702 MARC 4PIG Sus scrofa cDNA 5', mRNA sequence	0.165491	2.16163
GO:0043068	positive regulation of programmed cell death	EW421594		rnca11b_e13.y1 nca Sus scrofa cDNA 5', mRNA sequence	0.165491	2.16163
GO:0043068	positive regulation of programmed cell death	XM_001925866.1	LOC100152572	PREDICTED: Sus scrofa similar to MLK-related kinase (LOC100152572), mRNA	0.165491	2.16163
GO:0014706	striated muscle development	BX925993		BX925993 Sus Scrofa library (scan) Sus scrofa cDNA clone scan0021.f.19 5prim, mRNA sequence	0.166026	2.92456
GO:0014706	striated muscle development	DN128580		1142660 MARC 4PIG Sus scrofa cDNA 3', mRNA sequence	0.166026	2.92456
GO:0014706	striated muscle development	DV904076		POSM0605028_M02R porcine skeletal muscle cDNA library (PoSM) Sus scrofa cDNA 3', mRNA sequence	0.166026	2.92456
GO:0006997	nucleus organization	AK232555.1		Sus scrofa mRNA, clone:LVR010073A12, expressed in liver	0.166668	4.14312
GO:0006997	nucleus organization	EW421594		rnca11b_e13.y1 nca Sus scrofa cDNA 5', mRNA sequence	0.166668	4.14312
GO:0010468	regulation of gene expression	AK230581.1	----	Sus scrofa mRNA, clone:AMP010011G04, expressed in alveolar macrophage	0.168573	0.665859
GO:0010468	regulation of gene expression	AK234633.1		Sus scrofa mRNA, clone:OVR010100E10, expressed in ovary	0.168573	0.665859
GO:0010468	regulation of gene expression	AK240510.1		Sus scrofa mRNA, clone:UTR010085G05, expressed in uterus	0.168573	0.665859
GO:0010468	regulation of gene expression	AY820766.1	LOC654291	Sus scrofa SCL2A4RG-like mRNA, partial cds	0.168573	0.665859
GO:0010468	regulation of gene expression	BX664960		BX664960 Sus Scrofa library (scag) Sus scrofa cDNA clone scag0008.d.11 3prim, mRNA sequence	0.168573	0.665859
GO:0010468	regulation of gene expression	CK457656		921976 MARC 4PIG Sus scrofa cDNA 3', mRNA sequence	0.168573	0.665859
GO:0010468	regulation of gene expression	CK467405		938702 MARC 4PIG Sus scrofa cDNA 5', mRNA sequence	0.168573	0.665859
GO:0010468	regulation of gene expression	DN121268		1121355 MARC 4PIG Sus scrofa cDNA 3', mRNA sequence	0.168573	0.665859
GO:0010468	regulation of gene expression	EW316148		rpldo0102_g1.y1 ldo Sus scrofa cDNA 5', mRNA sequence	0.168573	0.665859
GO:0010468	regulation of gene expression	EW421594		rnca11b_e13.y1 nca Sus scrofa cDNA 5', mRNA sequence	0.168573	0.665859
GO:0010468	regulation of gene expression	EW464984		rnmm24c_m17.y1 nmm Sus scrofa cDNA 5', mRNA sequence	0.168573	0.665859
GO:0010468	regulation of gene expression	NM_001044545.1	PLAGL1	Sus scrofa pleiomorphic adenoma gene-like 1 (PLAGL1), mRNA	0.168573	0.665859
GO:0006357	regulation of transcription from RNA polymerase II promoter	AK230581.1	----	Sus scrofa mRNA, clone:AMP010011G04, expressed in alveolar macrophage	0.173554	0.248587
GO:0048869	cellular developmental process	AF329358.1	LAMB1	Sus scrofa laminin beta-1 chain mRNA, partial cds	0.174761	0.491036
GO:0048869	cellular developmental process	AK233000.1		Sus scrofa mRNA, clone:LVRM10065H01, expressed in liver	0.174761	0.491036
GO:0048869	cellular developmental process	BX925993		BX925993 Sus Scrofa library (scan) Sus scrofa cDNA clone scan0021.f.19 5prim, mRNA sequence	0.174761	0.491036
GO:0048869	cellular developmental process	DV904076		POSM0605028_M02R porcine skeletal muscle cDNA library (PoSM) Sus scrofa cDNA 3', mRNA sequence	0.174761	0.491036
GO:0040008	regulation of growth	AK230581.1	----	Sus scrofa mRNA, clone:AMP010011G04, expressed in alveolar macrophage	0.184564	2.33964
GO:0040008	regulation of growth	AY609666.1		Sus scrofa clone Clu_24219.scr.msk.p1.Contig4, mRNA sequence	0.184564	2.33964
GO:0040008	regulation of growth	DV904076		POSM0605028_M02R porcine skeletal muscle cDNA library (PoSM) Sus scrofa cDNA 3', mRNA sequence	0.184564	2.33964
GO:0040008	regulation of growth	EW421594		rnca11b_e13.y1 nca Sus scrofa cDNA 5', mRNA sequence	0.184564	2.33964
GO:0006917	induction of apoptosis	AK232555.1		Sus scrofa mRNA, clone:LVR010073A12, expressed in liver	0.190665	2.31244
GO:0006917	induction of apoptosis	BX915041		BX915041 Sus Scrofa library (scan) Sus scrofa cDNA clone scan0027.c.13 5prim, mRNA sequence	0.190665	2.31244
GO:0006917	induction of apoptosis	CK467405		938702 MARC 4PIG Sus scrofa cDNA 5', mRNA sequence	0.190665	2.31244
GO:0006917	induction of apoptosis	EW421594		rnca11b_e13.y1 nca Sus scrofa cDNA 5', mRNA sequence	0.190665	2.31244
GO:0012502	induction of programmed cell death	AK232555.1		Sus scrofa mRNA, clone:LVR010073A12, expressed in liver	0.190665	2.31244
GO:0012502	induction of programmed cell death	BX915041		BX915041 Sus Scrofa library (scan) Sus scrofa cDNA clone scan0027.c.13 5prim, mRNA sequence	0.190665	2.31244
GO:0012502	induction of programmed cell death	CK467405		938702 MARC 4PIG Sus scrofa cDNA 5', mRNA sequence	0.190665	2.31244
GO:0012502	induction of programmed cell death	EW421594		rnca11b_e13.y1 nca Sus scrofa cDNA 5', mRNA sequence	0.190665	2.31244
GO:0002204	somatic recombination of immunoglobulin genes during immune response	CN164178		994302 MARC 4PIG Sus scrofa cDNA 5', mRNA sequence	0.193223	9.94349
GO:0002208	somatic diversification of immunoglobulins during immune response	CN164178		994302 MARC 4PIG Sus scrofa cDNA 5', mRNA sequence	0.193223	9.94349
GO:0002381	immunoglobulin production during immune response	CN164178		994302 MARC 4PIG Sus scrofa cDNA 5', mRNA sequence	0.193223	9.94349
GO:0006309	DNA fragmentation during apoptosis	AK232555.1		Sus scrofa mRNA, clone:LVR010073A12, expressed in liver	0.193223	9.94349
GO:0006939	smooth muscle contraction	CK454645		915140 MARC 4PIG Sus scrofa cDNA 5', mRNA sequence	0.193223	9.94349
GO:0009798	axis specification	BX923538		BX923538 Sus Scrofa library (scan) Sus scrofa cDNA clone scan0014.h.08 5prim, mRNA sequence	0.193223	9.94349
GO:0030307	positive regulation of cell growth	AY609666.1		Sus scrofa clone Clu_24219.scr.msk.p1.Contig4, mRNA sequence	0.193223	9.94349
GO:0045176	apical protein localization	AK233000.1		Sus scrofa mRNA, clone:LVRM10065H01, expressed in liver	0.193223	9.94349
GO:0045190	isotype switching	CN164178		994302 MARC 4PIG Sus scrofa cDNA 5', mRNA sequence	0.193223	9.94349
GO:0045793	positive regulation of cell size	AY609666.1		Sus scrofa clone Clu_24219.scr.msk.p1.Contig4, mRNA sequence	0.193223	9.94349
GO:0048519	negative regulation of biological process	AK235751.1		Sus scrofa mRNA, clone:OVRM10111E07, expressed in ovary	0.195393	0.572562
GO:0048519	negative regulation of biological process	CK467405		938702 MARC 4PIG Sus scrofa cDNA 5', mRNA sequence	0.195393	0.572562
GO:0048519	negative regulation of biological process	DV904076		POSM0605028_M02R porcine skeletal muscle cDNA library (PoSM) Sus scrofa cDNA 3', mRNA sequence	0.195393	0.572562
GO:0048519	negative regulation of biological process	EW316148		rpldo0102_g1.y1 ldo Sus scrofa cDNA 5', mRNA sequence	0.195393	0.572562
GO:0048519	negative regulation of biological process	EW421594		rnca11b_e13.y1 nca Sus scrofa cDNA 5', mRNA sequence	0.195393	0.572562
GO:0048519	negative regulation of biological process	NM_001097486.1	ATPIF1	Sus scrofa ATPase inhibitory factor 1 (ATPIF1), nuclear gene encoding mitochondrial protein, mRNA	0.195393	0.572562
GO:0007154	cell communication	AK230570.1	LOC100152238	Sus scrofa mRNA, clone:AMP010011B05, expressed in alveolar macrophage	0.202616	0.682619
GO:0007154	cell communication	AK232555.1		Sus scrofa mRNA, clone:LVR010073A12, expressed in liver	0.202616	0.682619
GO:0007154	cell communication	AK235751.1		Sus scrofa mRNA, clone:OVRM10111E07, expressed in ovary	0.202616	0.682619
GO:0007154	cell communication	AK238982.1		Sus scrofa mRNA, clone:THY010053D09, expressed in thymus	0.202616	0.682619
GO:0007154	cell communication	AY609666.1		Sus scrofa clone Clu_24219.scr.msk.p1.Contig4, mRNA sequence	0.202616	0.682619
GO:0007154	cell communication	BX923538		BX923538 Sus Scrofa library (scan) Sus scrofa cDNA clone scan0014.h.08 5prim, mRNA sequence	0.202616	0.682619
GO:0007154	cell communication	CN164178		994302 MARC 4PIG Sus scrofa cDNA 5', mRNA sequence	0.202616	0.682619
GO:0007154	cell communication	DN121268		1121355 MARC 4PIG Sus scrofa cDNA 3', mRNA sequence	0.202616	0.682619
GO:0007154	cell communication	EW089566		recc2817c_e7.y1 ecc Sus scrofa cDNA 5', mRNA sequence	0.202616	0.682619
GO:0007154	cell communication	EW144888		rese17c_m9.y1 ese Sus scrofa cDNA 5', mRNA sequence	0.202616	0.682619
GO:0007154	cell communication	EW421594		rnca11b_e13.y1 nca Sus scrofa cDNA 5', mRNA sequence	0.202616	0.682619
GO:0007154	cell communication	XM_001925866.1	LOC100152572	PREDICTED: Sus scrofa similar to MLK-related kinase (LOC100152572), mRNA	0.202616	0.682619
GO:0010467	gene expression	AK233966.1		Sus scrofa mRNA, clone:MLN010082C02, expressed in mesenteric lymph node	0.203943	1.46228
GO:0010467	gene expression	AK236127.1		Sus scrofa mRNA, clone:OVRM10155A01, expressed in ovary	0.203943	1.46228
GO:0010467	gene expression	AK236404.1		Sus scrofa mRNA, clone:OVRM10189A09, expressed in ovary	0.203943	1.46228
GO:0010467	gene expression	AK238836.1		Sus scrofa mRNA, clone:THY010035H09, expressed in thymus	0.203943	1.46228
GO:0010467	gene expression	AY609798.1		Sus scrofa clone Clu_3164.scr.msk.p1.Contig1, mRNA sequence	0.203943	1.46228
GO:0010467	gene expression	AY610143.1		Sus scrofa clone Clu_7951.scr.msk.p1.Contig1, mRNA sequence	0.203943	1.46228
GO:0010467	gene expression	BI182307		UNL-P-FN-bg-h-08-0-UNL.s1 UNL-P-FN Sus scrofa cDNA clone UNL-P-FN-bg-h-08-0-UNL 3', mRNA sequence	0.203943	1.46228
GO:0010467	gene expression	CK457656		921976 MARC 4PIG Sus scrofa cDNA 3', mRNA sequence	0.203943	1.46228
GO:0010467	gene expression	DN123551		1123855 MARC 4PIG Sus scrofa cDNA 5', mRNA sequence	0.203943	1.46228
GO:0010467	gene expression	DY405876		1497400 MARC 3PIG Sus scrofa cDNA 5', mRNA sequence	0.203943	1.46228
GO:0010467	gene expression	EV928670		rche13_i19.y1 che Sus scrofa cDNA 5', mRNA sequence	0.203943	1.46228
GO:0010467	gene expression	XM_001926121.1	LOC100157971	PREDICTED: Sus scrofa similar to mitochondrial ribosomal protein L52 (LOC100157971), mRNA	0.203943	1.46228
GO:0010467	gene expression	XM_001927898.1	LOC100157624	PREDICTED: Sus scrofa similar to TSR2, 20S rRNA accumulation, homolog (S. cerevisiae) (LOC100157624), mRNA	0.203943	1.46228
GO:0010467	gene expression	XM_001929236.1	LOC100157075	PREDICTED: Sus scrofa similar to snurportin 1 (LOC100157075), mRNA	0.203943	1.46228
GO:0010646	regulation of cell communication	DB788903		DB788903 full-length enriched swine cDNA library, adult adrenal gland Sus scrofa cDNA clone ADR010083F11 5', mRNA sequence	0.204381	0.261671
GO:0008361	regulation of cell size	AY609666.1		Sus scrofa clone Clu_24219.scr.msk.p1.Contig4, mRNA sequence	0.205758	2.66343
GO:0008361	regulation of cell size	DV904076		POSM0605028_M02R porcine skeletal muscle cDNA library (PoSM) Sus scrofa cDNA 3', mRNA sequence	0.205758	2.66343
GO:0008361	regulation of cell size	EW421594		rnca11b_e13.y1 nca Sus scrofa cDNA 5', mRNA sequence	0.205758	2.66343
GO:0009057	macromolecule catabolic process	AK232555.1		Sus scrofa mRNA, clone:LVR010073A12, expressed in liver	0.210571	1.57833
GO:0009057	macromolecule catabolic process	AK235390.1		Sus scrofa mRNA, clone:OVRM10075G05, expressed in ovary	0.210571	1.57833
GO:0009057	macromolecule catabolic process	AK236127.1		Sus scrofa mRNA, clone:OVRM10155A01, expressed in ovary	0.210571	1.57833
GO:0009057	macromolecule catabolic process	AY609666.1		Sus scrofa clone Clu_24219.scr.msk.p1.Contig4, mRNA sequence	0.210571	1.57833
GO:0009057	macromolecule catabolic process	AY610143.1		Sus scrofa clone Clu_7951.scr.msk.p1.Contig1, mRNA sequence	0.210571	1.57833
GO:0009057	macromolecule catabolic process	AY610411.1	TPRKB	Sus scrofa clone risp02_p18.y1.abd, mRNA sequence	0.210571	1.57833
GO:0009057	macromolecule catabolic process	BX664880		BX664880 Sus Scrofa library (scag) Sus scrofa cDNA clone scag0005.d.07 5prim, mRNA sequence	0.210571	1.57833
GO:0009057	macromolecule catabolic process	BX915041		BX915041 Sus Scrofa library (scan) Sus scrofa cDNA clone scan0027.c.13 5prim, mRNA sequence	0.210571	1.57833
GO:0009057	macromolecule catabolic process	CJ012192		CJ012192 full-length enriched swine cDNA library, adult mesenteric lymph node Sus scrofa cDNA clone MLN01B080058 5', mRNA sequence	0.210571	1.57833
GO:0009057	macromolecule catabolic process	DY406584		1498188 MARC 3PIG Sus scrofa cDNA 5', mRNA sequence	0.210571	1.57833
GO:0045449	regulation of transcription	AK230581.1	----	Sus scrofa mRNA, clone:AMP010011G04, expressed in alveolar macrophage	0.211078	0.674343
GO:0045449	regulation of transcription	AK240510.1		Sus scrofa mRNA, clone:UTR010085G05, expressed in uterus	0.211078	0.674343
GO:0045449	regulation of transcription	AY820766.1	LOC654291	Sus scrofa SCL2A4RG-like mRNA, partial cds	0.211078	0.674343
GO:0045449	regulation of transcription	BX664960		BX664960 Sus Scrofa library (scag) Sus scrofa cDNA clone scag0008.d.11 3prim, mRNA sequence	0.211078	0.674343
GO:0045449	regulation of transcription	CK457656		921976 MARC 4PIG Sus scrofa cDNA 3', mRNA sequence	0.211078	0.674343
GO:0045449	regulation of transcription	CK467405		938702 MARC 4PIG Sus scrofa cDNA 5', mRNA sequence	0.211078	0.674343
GO:0045449	regulation of transcription	DN121268		1121355 MARC 4PIG Sus scrofa cDNA 3', mRNA sequence	0.211078	0.674343
GO:0045449	regulation of transcription	EW316148		rpldo0102_g1.y1 ldo Sus scrofa cDNA 5', mRNA sequence	0.211078	0.674343
GO:0045449	regulation of transcription	EW421594		rnca11b_e13.y1 nca Sus scrofa cDNA 5', mRNA sequence	0.211078	0.674343
GO:0045449	regulation of transcription	EW464984		rnmm24c_m17.y1 nmm Sus scrofa cDNA 5', mRNA sequence	0.211078	0.674343
GO:0045449	regulation of transcription	NM_001044545.1	PLAGL1	Sus scrofa pleiomorphic adenoma gene-like 1 (PLAGL1), mRNA	0.211078	0.674343
GO:0030198	extracellular matrix organization	DT324183		SusFleck_BF_0033_0036_5_pCNS_D01 SusFleck Backfat Sus scrofa cDNA clone 0033_0036_D01 5', mRNA sequence	0.216785	3.55125
GO:0030198	extracellular matrix organization	NM_001105288.1	COL5A3	Sus scrofa collagen, type V, alpha 3 (COL5A3), mRNA	0.216785	3.55125
GO:0006396	RNA processing	AK233966.1		Sus scrofa mRNA, clone:MLN010082C02, expressed in mesenteric lymph node	0.220165	1.60956
GO:0006396	RNA processing	AK236127.1		Sus scrofa mRNA, clone:OVRM10155A01, expressed in ovary	0.220165	1.60956
GO:0006396	RNA processing	AK236404.1		Sus scrofa mRNA, clone:OVRM10189A09, expressed in ovary	0.220165	1.60956
GO:0006396	RNA processing	AY609798.1		Sus scrofa clone Clu_3164.scr.msk.p1.Contig1, mRNA sequence	0.220165	1.60956
GO:0006396	RNA processing	AY610143.1		Sus scrofa clone Clu_7951.scr.msk.p1.Contig1, mRNA sequence	0.220165	1.60956
GO:0006396	RNA processing	BI182307		UNL-P-FN-bg-h-08-0-UNL.s1 UNL-P-FN Sus scrofa cDNA clone UNL-P-FN-bg-h-08-0-UNL 3', mRNA sequence	0.220165	1.60956
GO:0006396	RNA processing	CK457656		921976 MARC 4PIG Sus scrofa cDNA 3', mRNA sequence	0.220165	1.60956
GO:0006396	RNA processing	XM_001927898.1	LOC100157624	PREDICTED: Sus scrofa similar to TSR2, 20S rRNA accumulation, homolog (S. cerevisiae) (LOC100157624), mRNA	0.220165	1.60956
GO:0006396	RNA processing	XM_001929236.1	LOC100157075	PREDICTED: Sus scrofa similar to snurportin 1 (LOC100157075), mRNA	0.220165	1.60956
GO:0051276	chromosome organization	BX918412		BX918412 Sus Scrofa library (scan) Sus scrofa cDNA clone scan0038.i.09 5prim, mRNA sequence	0.22164	0.268743
GO:0002200	somatic diversification of immune receptors	CN164178		994302 MARC 4PIG Sus scrofa cDNA 5', mRNA sequence	0.229572	8.28624
GO:0002562	somatic diversification of immune receptors via germline recombination within a single locus	CN164178		994302 MARC 4PIG Sus scrofa cDNA 5', mRNA sequence	0.229572	8.28624
GO:0006515	misfolded or incompletely synthesized protein catabolic process	AY609666.1		Sus scrofa clone Clu_24219.scr.msk.p1.Contig4, mRNA sequence	0.229572	8.28624
GO:0006984	ER-nuclear signaling pathway	AY609666.1		Sus scrofa clone Clu_24219.scr.msk.p1.Contig4, mRNA sequence	0.229572	8.28624
GO:0016444	somatic cell DNA recombination	CN164178		994302 MARC 4PIG Sus scrofa cDNA 5', mRNA sequence	0.229572	8.28624
GO:0016445	somatic diversification of immunoglobulins	CN164178		994302 MARC 4PIG Sus scrofa cDNA 5', mRNA sequence	0.229572	8.28624
GO:0016447	somatic recombination of immunoglobulin gene segments	CN164178		994302 MARC 4PIG Sus scrofa cDNA 5', mRNA sequence	0.229572	8.28624
GO:0030433	ER-associated protein catabolic process	AY609666.1		Sus scrofa clone Clu_24219.scr.msk.p1.Contig4, mRNA sequence	0.229572	8.28624
GO:0048644	muscle morphogenesis	DV904076		POSM0605028_M02R porcine skeletal muscle cDNA library (PoSM) Sus scrofa cDNA 3', mRNA sequence	0.229572	8.28624
GO:0055008	cardiac muscle morphogenesis	DV904076		POSM0605028_M02R porcine skeletal muscle cDNA library (PoSM) Sus scrofa cDNA 3', mRNA sequence	0.229572	8.28624
GO:0055010	ventricular cardiac muscle morphogenesis	DV904076		POSM0605028_M02R porcine skeletal muscle cDNA library (PoSM) Sus scrofa cDNA 3', mRNA sequence	0.229572	8.28624
GO:0015980	energy derivation by oxidation of organic compounds	CK453061		908745 MARC 4PIG Sus scrofa cDNA 5', mRNA sequence	0.229873	3.42879
GO:0015980	energy derivation by oxidation of organic compounds	EV869069		rpbfe0138_n6.y1 bfe Sus scrofa cDNA 5', mRNA sequence	0.229873	3.42879
GO:0009889	regulation of biosynthetic process	AK230581.1	----	Sus scrofa mRNA, clone:AMP010011G04, expressed in alveolar macrophage	0.231331	0.706368
GO:0009889	regulation of biosynthetic process	AK234633.1		Sus scrofa mRNA, clone:OVR010100E10, expressed in ovary	0.231331	0.706368
GO:0009889	regulation of biosynthetic process	AK240510.1		Sus scrofa mRNA, clone:UTR010085G05, expressed in uterus	0.231331	0.706368
GO:0009889	regulation of biosynthetic process	AY820766.1	LOC654291	Sus scrofa SCL2A4RG-like mRNA, partial cds	0.231331	0.706368
GO:0009889	regulation of biosynthetic process	BX664960		BX664960 Sus Scrofa library (scag) Sus scrofa cDNA clone scag0008.d.11 3prim, mRNA sequence	0.231331	0.706368
GO:0009889	regulation of biosynthetic process	CK457656		921976 MARC 4PIG Sus scrofa cDNA 3', mRNA sequence	0.231331	0.706368
GO:0009889	regulation of biosynthetic process	CK467405		938702 MARC 4PIG Sus scrofa cDNA 5', mRNA sequence	0.231331	0.706368
GO:0009889	regulation of biosynthetic process	CN164178		994302 MARC 4PIG Sus scrofa cDNA 5', mRNA sequence	0.231331	0.706368
GO:0009889	regulation of biosynthetic process	DN121268		1121355 MARC 4PIG Sus scrofa cDNA 3', mRNA sequence	0.231331	0.706368
GO:0009889	regulation of biosynthetic process	EW316148		rpldo0102_g1.y1 ldo Sus scrofa cDNA 5', mRNA sequence	0.231331	0.706368
GO:0009889	regulation of biosynthetic process	EW421594		rnca11b_e13.y1 nca Sus scrofa cDNA 5', mRNA sequence	0.231331	0.706368
GO:0009889	regulation of biosynthetic process	EW464984		rnmm24c_m17.y1 nmm Sus scrofa cDNA 5', mRNA sequence	0.231331	0.706368
GO:0009889	regulation of biosynthetic process	NM_001044545.1	PLAGL1	Sus scrofa pleiomorphic adenoma gene-like 1 (PLAGL1), mRNA	0.231331	0.706368
GO:0031326	regulation of cellular biosynthetic process	AK230581.1	----	Sus scrofa mRNA, clone:AMP010011G04, expressed in alveolar macrophage	0.231331	0.706368
GO:0031326	regulation of cellular biosynthetic process	AK234633.1		Sus scrofa mRNA, clone:OVR010100E10, expressed in ovary	0.231331	0.706368
GO:0031326	regulation of cellular biosynthetic process	AK240510.1		Sus scrofa mRNA, clone:UTR010085G05, expressed in uterus	0.231331	0.706368
GO:0031326	regulation of cellular biosynthetic process	AY820766.1	LOC654291	Sus scrofa SCL2A4RG-like mRNA, partial cds	0.231331	0.706368
GO:0031326	regulation of cellular biosynthetic process	BX664960		BX664960 Sus Scrofa library (scag) Sus scrofa cDNA clone scag0008.d.11 3prim, mRNA sequence	0.231331	0.706368
GO:0031326	regulation of cellular biosynthetic process	CK457656		921976 MARC 4PIG Sus scrofa cDNA 3', mRNA sequence	0.231331	0.706368
GO:0031326	regulation of cellular biosynthetic process	CK467405		938702 MARC 4PIG Sus scrofa cDNA 5', mRNA sequence	0.231331	0.706368
GO:0031326	regulation of cellular biosynthetic process	CN164178		994302 MARC 4PIG Sus scrofa cDNA 5', mRNA sequence	0.231331	0.706368
GO:0031326	regulation of cellular biosynthetic process	DN121268		1121355 MARC 4PIG Sus scrofa cDNA 3', mRNA sequence	0.231331	0.706368
GO:0031326	regulation of cellular biosynthetic process	EW316148		rpldo0102_g1.y1 ldo Sus scrofa cDNA 5', mRNA sequence	0.231331	0.706368
GO:0031326	regulation of cellular biosynthetic process	EW421594		rnca11b_e13.y1 nca Sus scrofa cDNA 5', mRNA sequence	0.231331	0.706368
GO:0031326	regulation of cellular biosynthetic process	EW464984		rnmm24c_m17.y1 nmm Sus scrofa cDNA 5', mRNA sequence	0.231331	0.706368
GO:0031326	regulation of cellular biosynthetic process	NM_001044545.1	PLAGL1	Sus scrofa pleiomorphic adenoma gene-like 1 (PLAGL1), mRNA	0.231331	0.706368
GO:0007399	nervous system development	AF329358.1	LAMB1	Sus scrofa laminin beta-1 chain mRNA, partial cds	0.240045	0.399337
GO:0007399	nervous system development	AK233000.1		Sus scrofa mRNA, clone:LVRM10065H01, expressed in liver	0.240045	0.399337
GO:0042692	muscle cell differentiation	BX925993		BX925993 Sus Scrofa library (scan) Sus scrofa cDNA clone scan0021.f.19 5prim, mRNA sequence	0.243157	3.3145
GO:0042692	muscle cell differentiation	DV904076		POSM0605028_M02R porcine skeletal muscle cDNA library (PoSM) Sus scrofa cDNA 3', mRNA sequence	0.243157	3.3145
GO:0010556	regulation of macromolecule biosynthetic process	AK230581.1	----	Sus scrofa mRNA, clone:AMP010011G04, expressed in alveolar macrophage	0.244219	0.711814
GO:0010556	regulation of macromolecule biosynthetic process	AK234633.1		Sus scrofa mRNA, clone:OVR010100E10, expressed in ovary	0.244219	0.711814
GO:0010556	regulation of macromolecule biosynthetic process	AK240510.1		Sus scrofa mRNA, clone:UTR010085G05, expressed in uterus	0.244219	0.711814
GO:0010556	regulation of macromolecule biosynthetic process	AY820766.1	LOC654291	Sus scrofa SCL2A4RG-like mRNA, partial cds	0.244219	0.711814
GO:0010556	regulation of macromolecule biosynthetic process	BX664960		BX664960 Sus Scrofa library (scag) Sus scrofa cDNA clone scag0008.d.11 3prim, mRNA sequence	0.244219	0.711814
GO:0010556	regulation of macromolecule biosynthetic process	CK457656		921976 MARC 4PIG Sus scrofa cDNA 3', mRNA sequence	0.244219	0.711814
GO:0010556	regulation of macromolecule biosynthetic process	CK467405		938702 MARC 4PIG Sus scrofa cDNA 5', mRNA sequence	0.244219	0.711814
GO:0010556	regulation of macromolecule biosynthetic process	CN164178		994302 MARC 4PIG Sus scrofa cDNA 5', mRNA sequence	0.244219	0.711814
GO:0010556	regulation of macromolecule biosynthetic process	DN121268		1121355 MARC 4PIG Sus scrofa cDNA 3', mRNA sequence	0.244219	0.711814
GO:0010556	regulation of macromolecule biosynthetic process	EW316148		rpldo0102_g1.y1 ldo Sus scrofa cDNA 5', mRNA sequence	0.244219	0.711814
GO:0010556	regulation of macromolecule biosynthetic process	EW421594		rnca11b_e13.y1 nca Sus scrofa cDNA 5', mRNA sequence	0.244219	0.711814
GO:0010556	regulation of macromolecule biosynthetic process	EW464984		rnmm24c_m17.y1 nmm Sus scrofa cDNA 5', mRNA sequence	0.244219	0.711814
GO:0010556	regulation of macromolecule biosynthetic process	NM_001044545.1	PLAGL1	Sus scrofa pleiomorphic adenoma gene-like 1 (PLAGL1), mRNA	0.244219	0.711814
GO:0048523	negative regulation of cellular process	AK235751.1		Sus scrofa mRNA, clone:OVRM10111E07, expressed in ovary	0.252584	0.601421
GO:0048523	negative regulation of cellular process	CK467405		938702 MARC 4PIG Sus scrofa cDNA 5', mRNA sequence	0.252584	0.601421
GO:0048523	negative regulation of cellular process	DV904076		POSM0605028_M02R porcine skeletal muscle cDNA library (PoSM) Sus scrofa cDNA 3', mRNA sequence	0.252584	0.601421
GO:0048523	negative regulation of cellular process	EW316148		rpldo0102_g1.y1 ldo Sus scrofa cDNA 5', mRNA sequence	0.252584	0.601421
GO:0048523	negative regulation of cellular process	EW421594		rnca11b_e13.y1 nca Sus scrofa cDNA 5', mRNA sequence	0.252584	0.601421
GO:0048523	negative regulation of cellular process	NM_001097486.1	ATPIF1	Sus scrofa ATPase inhibitory factor 1 (ATPIF1), nuclear gene encoding mitochondrial protein, mRNA	0.252584	0.601421
GO:0007519	skeletal muscle development	BX925993		BX925993 Sus Scrofa library (scan) Sus scrofa cDNA clone scan0021.f.19 5prim, mRNA sequence	0.256623	3.20758
GO:0007519	skeletal muscle development	DN128580		1142660 MARC 4PIG Sus scrofa cDNA 3', mRNA sequence	0.256623	3.20758
GO:0043687	post-translational protein modification	AK238982.1		Sus scrofa mRNA, clone:THY010053D09, expressed in thymus	0.263248	0.537486
GO:0043687	post-translational protein modification	CK462437		933235 MARC 4PIG Sus scrofa cDNA 3', mRNA sequence	0.263248	0.537486
GO:0043687	post-translational protein modification	DB788903		DB788903 full-length enriched swine cDNA library, adult adrenal gland Sus scrofa cDNA clone ADR010083F11 5', mRNA sequence	0.263248	0.537486
GO:0043687	post-translational protein modification	XM_001925866.1	LOC100152572	PREDICTED: Sus scrofa similar to MLK-related kinase (LOC100152572), mRNA	0.263248	0.537486
GO:0022402	cell cycle process	AJ950507		AJ950507 KN404_1 Sus scrofa cDNA clone C0007741i12 5', mRNA sequence	0.264452	0.410888
GO:0022402	cell cycle process	BX915041		BX915041 Sus Scrofa library (scan) Sus scrofa cDNA clone scan0027.c.13 5prim, mRNA sequence	0.264452	0.410888
GO:0001936	regulation of endothelial cell proliferation	NM_001097486.1	ATPIF1	Sus scrofa ATPase inhibitory factor 1 (ATPIF1), nuclear gene encoding mitochondrial protein, mRNA	0.265191	7.10249
GO:0006921	cell structure disassembly during apoptosis	AK232555.1		Sus scrofa mRNA, clone:LVR010073A12, expressed in liver	0.265191	7.10249
GO:0034976	response to endoplasmic reticulum stress	AY609666.1		Sus scrofa clone Clu_24219.scr.msk.p1.Contig4, mRNA sequence	0.265191	7.10249
GO:0042364	water-soluble vitamin biosynthetic process	AY214329.1	LOC403161	Sus scrofa nicotinate phosphoribosyltransferase-like protein mRNA, partial cds	0.265191	7.10249
GO:0043588	skin development	NM_001105288.1	COL5A3	Sus scrofa collagen, type V, alpha 3 (COL5A3), mRNA	0.265191	7.10249
GO:0043283	biopolymer metabolic process	AJ950507		AJ950507 KN404_1 Sus scrofa cDNA clone C0007741i12 5', mRNA sequence	0.279637	1.21436
GO:0043283	biopolymer metabolic process	AK232555.1		Sus scrofa mRNA, clone:LVR010073A12, expressed in liver	0.279637	1.21436
GO:0043283	biopolymer metabolic process	AK233966.1		Sus scrofa mRNA, clone:MLN010082C02, expressed in mesenteric lymph node	0.279637	1.21436
GO:0043283	biopolymer metabolic process	AK234932.1		Sus scrofa mRNA, clone:OVRM10033G12, expressed in ovary	0.279637	1.21436
GO:0043283	biopolymer metabolic process	AK235390.1		Sus scrofa mRNA, clone:OVRM10075G05, expressed in ovary	0.279637	1.21436
GO:0043283	biopolymer metabolic process	AK236028.1		Sus scrofa mRNA, clone:OVRM10140A03, expressed in ovary	0.279637	1.21436
GO:0043283	biopolymer metabolic process	AK236127.1		Sus scrofa mRNA, clone:OVRM10155A01, expressed in ovary	0.279637	1.21436
GO:0043283	biopolymer metabolic process	AK236404.1		Sus scrofa mRNA, clone:OVRM10189A09, expressed in ovary	0.279637	1.21436
GO:0043283	biopolymer metabolic process	AK238836.1		Sus scrofa mRNA, clone:THY010035H09, expressed in thymus	0.279637	1.21436
GO:0043283	biopolymer metabolic process	AK238982.1		Sus scrofa mRNA, clone:THY010053D09, expressed in thymus	0.279637	1.21436
GO:0043283	biopolymer metabolic process	AY609666.1		Sus scrofa clone Clu_24219.scr.msk.p1.Contig4, mRNA sequence	0.279637	1.21436
GO:0043283	biopolymer metabolic process	AY609798.1		Sus scrofa clone Clu_3164.scr.msk.p1.Contig1, mRNA sequence	0.279637	1.21436
GO:0043283	biopolymer metabolic process	AY610143.1		Sus scrofa clone Clu_7951.scr.msk.p1.Contig1, mRNA sequence	0.279637	1.21436
GO:0043283	biopolymer metabolic process	AY610411.1	TPRKB	Sus scrofa clone risp02_p18.y1.abd, mRNA sequence	0.279637	1.21436
GO:0043283	biopolymer metabolic process	BI182307		UNL-P-FN-bg-h-08-0-UNL.s1 UNL-P-FN Sus scrofa cDNA clone UNL-P-FN-bg-h-08-0-UNL 3', mRNA sequence	0.279637	1.21436
GO:0043283	biopolymer metabolic process	BX664880		BX664880 Sus Scrofa library (scag) Sus scrofa cDNA clone scag0005.d.07 5prim, mRNA sequence	0.279637	1.21436
GO:0043283	biopolymer metabolic process	BX915041		BX915041 Sus Scrofa library (scan) Sus scrofa cDNA clone scan0027.c.13 5prim, mRNA sequence	0.279637	1.21436
GO:0043283	biopolymer metabolic process	BX918412		BX918412 Sus Scrofa library (scan) Sus scrofa cDNA clone scan0038.i.09 5prim, mRNA sequence	0.279637	1.21436
GO:0043283	biopolymer metabolic process	CJ012192		CJ012192 full-length enriched swine cDNA library, adult mesenteric lymph node Sus scrofa cDNA clone MLN01B080058 5', mRNA sequence	0.279637	1.21436
GO:0043283	biopolymer metabolic process	CK453061		908745 MARC 4PIG Sus scrofa cDNA 5', mRNA sequence	0.279637	1.21436
GO:0043283	biopolymer metabolic process	CK457656		921976 MARC 4PIG Sus scrofa cDNA 3', mRNA sequence	0.279637	1.21436
GO:0043283	biopolymer metabolic process	CK462437		933235 MARC 4PIG Sus scrofa cDNA 3', mRNA sequence	0.279637	1.21436
GO:0043283	biopolymer metabolic process	CN164178		994302 MARC 4PIG Sus scrofa cDNA 5', mRNA sequence	0.279637	1.21436
GO:0043283	biopolymer metabolic process	DB788903		DB788903 full-length enriched swine cDNA library, adult adrenal gland Sus scrofa cDNA clone ADR010083F11 5', mRNA sequence	0.279637	1.21436
GO:0043283	biopolymer metabolic process	DN123551		1123855 MARC 4PIG Sus scrofa cDNA 5', mRNA sequence	0.279637	1.21436
GO:0043283	biopolymer metabolic process	DY405876		1497400 MARC 3PIG Sus scrofa cDNA 5', mRNA sequence	0.279637	1.21436
GO:0043283	biopolymer metabolic process	DY406584		1498188 MARC 3PIG Sus scrofa cDNA 5', mRNA sequence	0.279637	1.21436
GO:0043283	biopolymer metabolic process	EV869069		rpbfe0138_n6.y1 bfe Sus scrofa cDNA 5', mRNA sequence	0.279637	1.21436
GO:0043283	biopolymer metabolic process	EV928670		rche13_i19.y1 che Sus scrofa cDNA 5', mRNA sequence	0.279637	1.21436
GO:0043283	biopolymer metabolic process	EW290234		rjej38b_p21.y1 jej Sus scrofa cDNA 5', mRNA sequence	0.279637	1.21436
GO:0043283	biopolymer metabolic process	XM_001925866.1	LOC100152572	PREDICTED: Sus scrofa similar to MLK-related kinase (LOC100152572), mRNA	0.279637	1.21436
GO:0043283	biopolymer metabolic process	XM_001926121.1	LOC100157971	PREDICTED: Sus scrofa similar to mitochondrial ribosomal protein L52 (LOC100157971), mRNA	0.279637	1.21436
GO:0043283	biopolymer metabolic process	XM_001927898.1	LOC100157624	PREDICTED: Sus scrofa similar to TSR2, 20S rRNA accumulation, homolog (S. cerevisiae) (LOC100157624), mRNA	0.279637	1.21436
GO:0043283	biopolymer metabolic process	XM_001929236.1	LOC100157075	PREDICTED: Sus scrofa similar to snurportin 1 (LOC100157075), mRNA	0.279637	1.21436
GO:0030154	cell differentiation	AF329358.1	LAMB1	Sus scrofa laminin beta-1 chain mRNA, partial cds	0.281715	0.546345
GO:0030154	cell differentiation	AK233000.1		Sus scrofa mRNA, clone:LVRM10065H01, expressed in liver	0.281715	0.546345
GO:0030154	cell differentiation	BX925993		BX925993 Sus Scrofa library (scan) Sus scrofa cDNA clone scan0021.f.19 5prim, mRNA sequence	0.281715	0.546345
GO:0030154	cell differentiation	DV904076		POSM0605028_M02R porcine skeletal muscle cDNA library (PoSM) Sus scrofa cDNA 3', mRNA sequence	0.281715	0.546345
GO:0000278	mitotic cell cycle	BX915041		BX915041 Sus Scrofa library (scan) Sus scrofa cDNA clone scan0027.c.13 5prim, mRNA sequence	0.286327	0.294186
GO:0009966	regulation of signal transduction	DB788903		DB788903 full-length enriched swine cDNA library, adult adrenal gland Sus scrofa cDNA clone ADR010083F11 5', mRNA sequence	0.290895	0.295937
GO:0042981	regulation of apoptosis	AK232555.1		Sus scrofa mRNA, clone:LVR010073A12, expressed in liver	0.293068	1.61121
GO:0042981	regulation of apoptosis	AK235751.1		Sus scrofa mRNA, clone:OVRM10111E07, expressed in ovary	0.293068	1.61121
GO:0042981	regulation of apoptosis	AK239728.1		Sus scrofa mRNA, clone:THY010126C02, expressed in thymus	0.293068	1.61121
GO:0042981	regulation of apoptosis	BX915041		BX915041 Sus Scrofa library (scan) Sus scrofa cDNA clone scan0027.c.13 5prim, mRNA sequence	0.293068	1.61121
GO:0042981	regulation of apoptosis	CK467405		938702 MARC 4PIG Sus scrofa cDNA 5', mRNA sequence	0.293068	1.61121
GO:0042981	regulation of apoptosis	EW421594		rnca11b_e13.y1 nca Sus scrofa cDNA 5', mRNA sequence	0.293068	1.61121
GO:0042981	regulation of apoptosis	XM_001925866.1	LOC100152572	PREDICTED: Sus scrofa similar to MLK-related kinase (LOC100152572), mRNA	0.293068	1.61121
GO:0016197	endosome transport	BX666658		BX666658 Sus Scrofa library (scac) Sus scrofa cDNA clone scac0025.d.07 3prim, mRNA sequence	0.297993	2.92456
GO:0016197	endosome transport	CK454638		915131 MARC 4PIG Sus scrofa cDNA 5', mRNA sequence	0.297993	2.92456
GO:0002377	immunoglobulin production	CN164178		994302 MARC 4PIG Sus scrofa cDNA 5', mRNA sequence	0.300096	6.21468
GO:0003015	heart process	DV904076		POSM0605028_M02R porcine skeletal muscle cDNA library (PoSM) Sus scrofa cDNA 3', mRNA sequence	0.300096	6.21468
GO:0008543	fibroblast growth factor receptor signaling pathway	EW144888		rese17c_m9.y1 ese Sus scrofa cDNA 5', mRNA sequence	0.300096	6.21468
GO:0015800	acidic amino acid transport	AK234908	LOC595127	Sus scrofa mRNA, clone:OVRM10028H08, expressed in ovary	0.300096	6.21468
GO:0015813	L-glutamate transport	AK234908	LOC595127	Sus scrofa mRNA, clone:OVRM10028H08, expressed in ovary	0.300096	6.21468
GO:0019439	aromatic compound catabolic process	AK236389	EPHX1	Sus scrofa mRNA, clone:OVRM10187H12, expressed in ovary	0.300096	6.21468
GO:0042476	odontogenesis	AF329358.1	LAMB1	Sus scrofa laminin beta-1 chain mRNA, partial cds	0.300096	6.21468
GO:0055003	cardiac myofibril assembly	DV904076		POSM0605028_M02R porcine skeletal muscle cDNA library (PoSM) Sus scrofa cDNA 3', mRNA sequence	0.300096	6.21468
GO:0055013	cardiac muscle cell development	DV904076		POSM0605028_M02R porcine skeletal muscle cDNA library (PoSM) Sus scrofa cDNA 3', mRNA sequence	0.300096	6.21468
GO:0060047	heart contraction	DV904076		POSM0605028_M02R porcine skeletal muscle cDNA library (PoSM) Sus scrofa cDNA 3', mRNA sequence	0.300096	6.21468
GO:0043067	regulation of programmed cell death	AK232555.1		Sus scrofa mRNA, clone:LVR010073A12, expressed in liver	0.307919	1.58914
GO:0043067	regulation of programmed cell death	AK235751.1		Sus scrofa mRNA, clone:OVRM10111E07, expressed in ovary	0.307919	1.58914
GO:0043067	regulation of programmed cell death	AK239728.1		Sus scrofa mRNA, clone:THY010126C02, expressed in thymus	0.307919	1.58914
GO:0043067	regulation of programmed cell death	BX915041		BX915041 Sus Scrofa library (scan) Sus scrofa cDNA clone scan0027.c.13 5prim, mRNA sequence	0.307919	1.58914
GO:0043067	regulation of programmed cell death	CK467405		938702 MARC 4PIG Sus scrofa cDNA 5', mRNA sequence	0.307919	1.58914
GO:0043067	regulation of programmed cell death	EW421594		rnca11b_e13.y1 nca Sus scrofa cDNA 5', mRNA sequence	0.307919	1.58914
GO:0043067	regulation of programmed cell death	XM_001925866.1	LOC100152572	PREDICTED: Sus scrofa similar to MLK-related kinase (LOC100152572), mRNA	0.307919	1.58914
GO:0043170	macromolecule metabolic process	AJ950507		AJ950507 KN404_1 Sus scrofa cDNA clone C0007741i12 5', mRNA sequence	0.310215	1.18987
GO:0043170	macromolecule metabolic process	AK232555.1		Sus scrofa mRNA, clone:LVR010073A12, expressed in liver	0.310215	1.18987
GO:0043170	macromolecule metabolic process	AK233966.1		Sus scrofa mRNA, clone:MLN010082C02, expressed in mesenteric lymph node	0.310215	1.18987
GO:0043170	macromolecule metabolic process	AK234932.1		Sus scrofa mRNA, clone:OVRM10033G12, expressed in ovary	0.310215	1.18987
GO:0043170	macromolecule metabolic process	AK235390.1		Sus scrofa mRNA, clone:OVRM10075G05, expressed in ovary	0.310215	1.18987
GO:0043170	macromolecule metabolic process	AK236028.1		Sus scrofa mRNA, clone:OVRM10140A03, expressed in ovary	0.310215	1.18987
GO:0043170	macromolecule metabolic process	AK236127.1		Sus scrofa mRNA, clone:OVRM10155A01, expressed in ovary	0.310215	1.18987
GO:0043170	macromolecule metabolic process	AK236404.1		Sus scrofa mRNA, clone:OVRM10189A09, expressed in ovary	0.310215	1.18987
GO:0043170	macromolecule metabolic process	AK238836.1		Sus scrofa mRNA, clone:THY010035H09, expressed in thymus	0.310215	1.18987
GO:0043170	macromolecule metabolic process	AK238982.1		Sus scrofa mRNA, clone:THY010053D09, expressed in thymus	0.310215	1.18987
GO:0043170	macromolecule metabolic process	AK239600.1		Sus scrofa mRNA, clone:THY010115C09, expressed in thymus	0.310215	1.18987
GO:0043170	macromolecule metabolic process	AK239728.1		Sus scrofa mRNA, clone:THY010126C02, expressed in thymus	0.310215	1.18987
GO:0043170	macromolecule metabolic process	AY609666.1		Sus scrofa clone Clu_24219.scr.msk.p1.Contig4, mRNA sequence	0.310215	1.18987
GO:0043170	macromolecule metabolic process	AY609798.1		Sus scrofa clone Clu_3164.scr.msk.p1.Contig1, mRNA sequence	0.310215	1.18987
GO:0043170	macromolecule metabolic process	AY610143.1		Sus scrofa clone Clu_7951.scr.msk.p1.Contig1, mRNA sequence	0.310215	1.18987
GO:0043170	macromolecule metabolic process	AY610411.1	TPRKB	Sus scrofa clone risp02_p18.y1.abd, mRNA sequence	0.310215	1.18987
GO:0043170	macromolecule metabolic process	BI182307		UNL-P-FN-bg-h-08-0-UNL.s1 UNL-P-FN Sus scrofa cDNA clone UNL-P-FN-bg-h-08-0-UNL 3', mRNA sequence	0.310215	1.18987
GO:0043170	macromolecule metabolic process	BX664880		BX664880 Sus Scrofa library (scag) Sus scrofa cDNA clone scag0005.d.07 5prim, mRNA sequence	0.310215	1.18987
GO:0043170	macromolecule metabolic process	BX915041		BX915041 Sus Scrofa library (scan) Sus scrofa cDNA clone scan0027.c.13 5prim, mRNA sequence	0.310215	1.18987
GO:0043170	macromolecule metabolic process	BX918412		BX918412 Sus Scrofa library (scan) Sus scrofa cDNA clone scan0038.i.09 5prim, mRNA sequence	0.310215	1.18987
GO:0043170	macromolecule metabolic process	CJ012192		CJ012192 full-length enriched swine cDNA library, adult mesenteric lymph node Sus scrofa cDNA clone MLN01B080058 5', mRNA sequence	0.310215	1.18987
GO:0043170	macromolecule metabolic process	CK453061		908745 MARC 4PIG Sus scrofa cDNA 5', mRNA sequence	0.310215	1.18987
GO:0043170	macromolecule metabolic process	CK457656		921976 MARC 4PIG Sus scrofa cDNA 3', mRNA sequence	0.310215	1.18987
GO:0043170	macromolecule metabolic process	CK462437		933235 MARC 4PIG Sus scrofa cDNA 3', mRNA sequence	0.310215	1.18987
GO:0043170	macromolecule metabolic process	CN164178		994302 MARC 4PIG Sus scrofa cDNA 5', mRNA sequence	0.310215	1.18987
GO:0043170	macromolecule metabolic process	DB788903		DB788903 full-length enriched swine cDNA library, adult adrenal gland Sus scrofa cDNA clone ADR010083F11 5', mRNA sequence	0.310215	1.18987
GO:0043170	macromolecule metabolic process	DN123551		1123855 MARC 4PIG Sus scrofa cDNA 5', mRNA sequence	0.310215	1.18987
GO:0043170	macromolecule metabolic process	DY405876		1497400 MARC 3PIG Sus scrofa cDNA 5', mRNA sequence	0.310215	1.18987
GO:0043170	macromolecule metabolic process	DY406584		1498188 MARC 3PIG Sus scrofa cDNA 5', mRNA sequence	0.310215	1.18987
GO:0043170	macromolecule metabolic process	EV869069		rpbfe0138_n6.y1 bfe Sus scrofa cDNA 5', mRNA sequence	0.310215	1.18987
GO:0043170	macromolecule metabolic process	EV928670		rche13_i19.y1 che Sus scrofa cDNA 5', mRNA sequence	0.310215	1.18987
GO:0043170	macromolecule metabolic process	EW290234		rjej38b_p21.y1 jej Sus scrofa cDNA 5', mRNA sequence	0.310215	1.18987
GO:0043170	macromolecule metabolic process	NM_214039.1	ACADM	Sus scrofa acyl-Coenzyme A dehydrogenase, C-4 to C-12 straight chain (ACADM), nuclear gene encoding mitochondrial protein, mRNA	0.310215	1.18987
GO:0043170	macromolecule metabolic process	XM_001925866.1	LOC100152572	PREDICTED: Sus scrofa similar to MLK-related kinase (LOC100152572), mRNA	0.310215	1.18987
GO:0043170	macromolecule metabolic process	XM_001926121.1	LOC100157971	PREDICTED: Sus scrofa similar to mitochondrial ribosomal protein L52 (LOC100157971), mRNA	0.310215	1.18987
GO:0043170	macromolecule metabolic process	XM_001927898.1	LOC100157624	PREDICTED: Sus scrofa similar to TSR2, 20S rRNA accumulation, homolog (S. cerevisiae) (LOC100157624), mRNA	0.310215	1.18987
GO:0043170	macromolecule metabolic process	XM_001929236.1	LOC100157075	PREDICTED: Sus scrofa similar to snurportin 1 (LOC100157075), mRNA	0.310215	1.18987
GO:0043412	biopolymer modification	AK236028.1		Sus scrofa mRNA, clone:OVRM10140A03, expressed in ovary	0.310707	0.62801
GO:0043412	biopolymer modification	AK238982.1		Sus scrofa mRNA, clone:THY010053D09, expressed in thymus	0.310707	0.62801
GO:0043412	biopolymer modification	CK462437		933235 MARC 4PIG Sus scrofa cDNA 3', mRNA sequence	0.310707	0.62801
GO:0043412	biopolymer modification	DB788903		DB788903 full-length enriched swine cDNA library, adult adrenal gland Sus scrofa cDNA clone ADR010083F11 5', mRNA sequence	0.310707	0.62801
GO:0043412	biopolymer modification	EW290234		rjej38b_p21.y1 jej Sus scrofa cDNA 5', mRNA sequence	0.310707	0.62801
GO:0043412	biopolymer modification	XM_001925866.1	LOC100152572	PREDICTED: Sus scrofa similar to MLK-related kinase (LOC100152572), mRNA	0.310707	0.62801
GO:0010498	proteasomal protein catabolic process	AY609666.1		Sus scrofa clone Clu_24219.scr.msk.p1.Contig4, mRNA sequence	0.312067	2.841
GO:0010498	proteasomal protein catabolic process	BX915041		BX915041 Sus Scrofa library (scan) Sus scrofa cDNA clone scan0027.c.13 5prim, mRNA sequence	0.312067	2.841
GO:0043062	extracellular structure organization	DT324183		SusFleck_BF_0033_0036_5_pCNS_D01 SusFleck Backfat Sus scrofa cDNA clone 0033_0036_D01 5', mRNA sequence	0.312067	2.841
GO:0043062	extracellular structure organization	NM_001105288.1	COL5A3	Sus scrofa collagen, type V, alpha 3 (COL5A3), mRNA	0.312067	2.841
GO:0043161	proteasomal ubiquitin-dependent protein catabolic process	AY609666.1		Sus scrofa clone Clu_24219.scr.msk.p1.Contig4, mRNA sequence	0.312067	2.841
GO:0043161	proteasomal ubiquitin-dependent protein catabolic process	BX915041		BX915041 Sus Scrofa library (scan) Sus scrofa cDNA clone scan0027.c.13 5prim, mRNA sequence	0.312067	2.841
GO:0034470	ncRNA processing	AK233966.1		Sus scrofa mRNA, clone:MLN010082C02, expressed in mesenteric lymph node	0.313948	2.19342
GO:0034470	ncRNA processing	AY610143.1		Sus scrofa clone Clu_7951.scr.msk.p1.Contig1, mRNA sequence	0.313948	2.19342
GO:0034470	ncRNA processing	XM_001927898.1	LOC100157624	PREDICTED: Sus scrofa similar to TSR2, 20S rRNA accumulation, homolog (S. cerevisiae) (LOC100157624), mRNA	0.313948	2.19342
GO:0044265	cellular macromolecule catabolic process	AK232555.1		Sus scrofa mRNA, clone:LVR010073A12, expressed in liver	0.318403	1.47676
GO:0044265	cellular macromolecule catabolic process	AK235390.1		Sus scrofa mRNA, clone:OVRM10075G05, expressed in ovary	0.318403	1.47676
GO:0044265	cellular macromolecule catabolic process	AK236127.1		Sus scrofa mRNA, clone:OVRM10155A01, expressed in ovary	0.318403	1.47676
GO:0044265	cellular macromolecule catabolic process	AY609666.1		Sus scrofa clone Clu_24219.scr.msk.p1.Contig4, mRNA sequence	0.318403	1.47676
GO:0044265	cellular macromolecule catabolic process	AY610143.1		Sus scrofa clone Clu_7951.scr.msk.p1.Contig1, mRNA sequence	0.318403	1.47676
GO:0044265	cellular macromolecule catabolic process	BX664880		BX664880 Sus Scrofa library (scag) Sus scrofa cDNA clone scag0005.d.07 5prim, mRNA sequence	0.318403	1.47676
GO:0044265	cellular macromolecule catabolic process	BX915041		BX915041 Sus Scrofa library (scan) Sus scrofa cDNA clone scan0027.c.13 5prim, mRNA sequence	0.318403	1.47676
GO:0044265	cellular macromolecule catabolic process	CJ012192		CJ012192 full-length enriched swine cDNA library, adult mesenteric lymph node Sus scrofa cDNA clone MLN01B080058 5', mRNA sequence	0.318403	1.47676
GO:0044265	cellular macromolecule catabolic process	DY406584		1498188 MARC 3PIG Sus scrofa cDNA 5', mRNA sequence	0.318403	1.47676
GO:0051707	response to other organism	AK230570.1	LOC100152238	Sus scrofa mRNA, clone:AMP010011B05, expressed in alveolar macrophage	0.323648	2.16163
GO:0051707	response to other organism	AK236404.1		Sus scrofa mRNA, clone:OVRM10189A09, expressed in ovary	0.323648	2.16163
GO:0051707	response to other organism	EW316148		rpldo0102_g1.y1 ldo Sus scrofa cDNA 5', mRNA sequence	0.323648	2.16163
GO:0002440	production of molecular mediator of immune response	CN164178		994302 MARC 4PIG Sus scrofa cDNA 5', mRNA sequence	0.334299	5.52416
GO:0006942	regulation of striated muscle contraction	DV904076		POSM0605028_M02R porcine skeletal muscle cDNA library (PoSM) Sus scrofa cDNA 3', mRNA sequence	0.334299	5.52416
GO:0007044	cell-substrate junction assembly	DT324183		SusFleck_BF_0033_0036_5_pCNS_D01 SusFleck Backfat Sus scrofa cDNA clone 0033_0036_D01 5', mRNA sequence	0.334299	5.52416
GO:0007131	reciprocal meiotic recombination	AJ950507		AJ950507 KN404_1 Sus scrofa cDNA clone C0007741i12 5', mRNA sequence	0.334299	5.52416
GO:0008105	asymmetric protein localization	AK233000.1		Sus scrofa mRNA, clone:LVRM10065H01, expressed in liver	0.334299	5.52416
GO:0008584	male gonad development	BX672955		BX672955 Sus Scrofa library (scac) Sus scrofa cDNA clone scac0044.o.04 5prim, mRNA sequence	0.334299	5.52416
GO:0009110	vitamin biosynthetic process	AY214329.1	LOC403161	Sus scrofa nicotinate phosphoribosyltransferase-like protein mRNA, partial cds	0.334299	5.52416
GO:0009311	oligosaccharide metabolic process	AK236028.1		Sus scrofa mRNA, clone:OVRM10140A03, expressed in ovary	0.334299	5.52416
GO:0045814	negative regulation of gene expression, epigenetic	EW316148		rpldo0102_g1.y1 ldo Sus scrofa cDNA 5', mRNA sequence	0.334299	5.52416
GO:0045927	positive regulation of growth	AY609666.1		Sus scrofa clone Clu_24219.scr.msk.p1.Contig4, mRNA sequence	0.334299	5.52416
GO:0046546	development of primary male sexual characteristics	BX672955		BX672955 Sus Scrofa library (scac) Sus scrofa cDNA clone scac0044.o.04 5prim, mRNA sequence	0.334299	5.52416
GO:0007165	signal transduction	AK230570.1	LOC100152238	Sus scrofa mRNA, clone:AMP010011B05, expressed in alveolar macrophage	0.336569	0.737465
GO:0007165	signal transduction	AK232555.1		Sus scrofa mRNA, clone:LVR010073A12, expressed in liver	0.336569	0.737465
GO:0007165	signal transduction	AK235751.1		Sus scrofa mRNA, clone:OVRM10111E07, expressed in ovary	0.336569	0.737465
GO:0007165	signal transduction	AK238982.1		Sus scrofa mRNA, clone:THY010053D09, expressed in thymus	0.336569	0.737465
GO:0007165	signal transduction	AY609666.1		Sus scrofa clone Clu_24219.scr.msk.p1.Contig4, mRNA sequence	0.336569	0.737465
GO:0007165	signal transduction	BX923538		BX923538 Sus Scrofa library (scan) Sus scrofa cDNA clone scan0014.h.08 5prim, mRNA sequence	0.336569	0.737465
GO:0007165	signal transduction	CN164178		994302 MARC 4PIG Sus scrofa cDNA 5', mRNA sequence	0.336569	0.737465
GO:0007165	signal transduction	DN121268		1121355 MARC 4PIG Sus scrofa cDNA 3', mRNA sequence	0.336569	0.737465
GO:0007165	signal transduction	EW089566		recc2817c_e7.y1 ecc Sus scrofa cDNA 5', mRNA sequence	0.336569	0.737465
GO:0007165	signal transduction	EW144888		rese17c_m9.y1 ese Sus scrofa cDNA 5', mRNA sequence	0.336569	0.737465
GO:0007165	signal transduction	EW421594		rnca11b_e13.y1 nca Sus scrofa cDNA 5', mRNA sequence	0.336569	0.737465
GO:0007165	signal transduction	XM_001925866.1	LOC100152572	PREDICTED: Sus scrofa similar to MLK-related kinase (LOC100152572), mRNA	0.336569	0.737465
GO:0030308	negative regulation of cell growth	DV904076		POSM0605028_M02R porcine skeletal muscle cDNA library (PoSM) Sus scrofa cDNA 3', mRNA sequence	0.340574	2.68743
GO:0030308	negative regulation of cell growth	EW421594		rnca11b_e13.y1 nca Sus scrofa cDNA 5', mRNA sequence	0.340574	2.68743
GO:0045792	negative regulation of cell size	DV904076		POSM0605028_M02R porcine skeletal muscle cDNA library (PoSM) Sus scrofa cDNA 3', mRNA sequence	0.340574	2.68743
GO:0045792	negative regulation of cell size	EW421594		rnca11b_e13.y1 nca Sus scrofa cDNA 5', mRNA sequence	0.340574	2.68743
GO:0006464	protein modification process	AK236028.1		Sus scrofa mRNA, clone:OVRM10140A03, expressed in ovary	0.35508	0.647082
GO:0006464	protein modification process	AK238982.1		Sus scrofa mRNA, clone:THY010053D09, expressed in thymus	0.35508	0.647082
GO:0006464	protein modification process	CK462437		933235 MARC 4PIG Sus scrofa cDNA 3', mRNA sequence	0.35508	0.647082
GO:0006464	protein modification process	DB788903		DB788903 full-length enriched swine cDNA library, adult adrenal gland Sus scrofa cDNA clone ADR010083F11 5', mRNA sequence	0.35508	0.647082
GO:0006464	protein modification process	EW290234		rjej38b_p21.y1 jej Sus scrofa cDNA 5', mRNA sequence	0.35508	0.647082
GO:0006464	protein modification process	XM_001925866.1	LOC100152572	PREDICTED: Sus scrofa similar to MLK-related kinase (LOC100152572), mRNA	0.35508	0.647082
GO:0000279	M phase	AJ950507		AJ950507 KN404_1 Sus scrofa cDNA clone C0007741i12 5', mRNA sequence	0.356597	0.320758
GO:0009611	response to wounding	AK236127.1		Sus scrofa mRNA, clone:OVRM10155A01, expressed in ovary	0.356597	0.320758
GO:0006793	phosphorus metabolic process	AK238982.1		Sus scrofa mRNA, clone:THY010053D09, expressed in thymus	0.360967	0.530791
GO:0006793	phosphorus metabolic process	DB788903		DB788903 full-length enriched swine cDNA library, adult adrenal gland Sus scrofa cDNA clone ADR010083F11 5', mRNA sequence	0.360967	0.530791
GO:0006793	phosphorus metabolic process	XM_001925866.1	LOC100152572	PREDICTED: Sus scrofa similar to MLK-related kinase (LOC100152572), mRNA	0.360967	0.530791
GO:0006796	phosphate metabolic process	AK238982.1		Sus scrofa mRNA, clone:THY010053D09, expressed in thymus	0.360967	0.530791
GO:0006796	phosphate metabolic process	DB788903		DB788903 full-length enriched swine cDNA library, adult adrenal gland Sus scrofa cDNA clone ADR010083F11 5', mRNA sequence	0.360967	0.530791
GO:0006796	phosphate metabolic process	XM_001925866.1	LOC100152572	PREDICTED: Sus scrofa similar to MLK-related kinase (LOC100152572), mRNA	0.360967	0.530791
GO:0008630	DNA damage response, signal transduction resulting in induction of apoptosis	AK232555.1		Sus scrofa mRNA, clone:LVR010073A12, expressed in liver	0.367816	4.97174
GO:0046661	male sex differentiation	BX672955		BX672955 Sus Scrofa library (scac) Sus scrofa cDNA clone scac0044.o.04 5prim, mRNA sequence	0.367816	4.97174
GO:0045926	negative regulation of growth	DV904076		POSM0605028_M02R porcine skeletal muscle cDNA library (PoSM) Sus scrofa cDNA 3', mRNA sequence	0.369491	2.54961
GO:0045926	negative regulation of growth	EW421594		rnca11b_e13.y1 nca Sus scrofa cDNA 5', mRNA sequence	0.369491	2.54961
GO:0048522	positive regulation of cellular process	AF329358.1	LAMB1	Sus scrofa laminin beta-1 chain mRNA, partial cds	0.370377	1.32716
GO:0048522	positive regulation of cellular process	AK232555.1		Sus scrofa mRNA, clone:LVR010073A12, expressed in liver	0.370377	1.32716
GO:0048522	positive regulation of cellular process	AY609666.1		Sus scrofa clone Clu_24219.scr.msk.p1.Contig4, mRNA sequence	0.370377	1.32716
GO:0048522	positive regulation of cellular process	BX915041		BX915041 Sus Scrofa library (scan) Sus scrofa cDNA clone scan0027.c.13 5prim, mRNA sequence	0.370377	1.32716
GO:0048522	positive regulation of cellular process	BX918412		BX918412 Sus Scrofa library (scan) Sus scrofa cDNA clone scan0038.i.09 5prim, mRNA sequence	0.370377	1.32716
GO:0048522	positive regulation of cellular process	CK467405		938702 MARC 4PIG Sus scrofa cDNA 5', mRNA sequence	0.370377	1.32716
GO:0048522	positive regulation of cellular process	CN164178		994302 MARC 4PIG Sus scrofa cDNA 5', mRNA sequence	0.370377	1.32716
GO:0048522	positive regulation of cellular process	DN121268		1121355 MARC 4PIG Sus scrofa cDNA 3', mRNA sequence	0.370377	1.32716
GO:0048522	positive regulation of cellular process	DT324183		SusFleck_BF_0033_0036_5_pCNS_D01 SusFleck Backfat Sus scrofa cDNA clone 0033_0036_D01 5', mRNA sequence	0.370377	1.32716
GO:0048522	positive regulation of cellular process	EW222667		rgul0130_k18.y1 gul Sus scrofa cDNA 5', mRNA sequence	0.370377	1.32716
GO:0048522	positive regulation of cellular process	EW421594		rnca11b_e13.y1 nca Sus scrofa cDNA 5', mRNA sequence	0.370377	1.32716
GO:0048522	positive regulation of cellular process	EW464984		rnmm24c_m17.y1 nmm Sus scrofa cDNA 5', mRNA sequence	0.370377	1.32716
GO:0048522	positive regulation of cellular process	XM_001925866.1	LOC100152572	PREDICTED: Sus scrofa similar to MLK-related kinase (LOC100152572), mRNA	0.370377	1.32716
GO:0008104	protein localization	AK233000.1		Sus scrofa mRNA, clone:LVRM10065H01, expressed in liver	0.374567	0.588372
GO:0008104	protein localization	AY609666.1		Sus scrofa clone Clu_24219.scr.msk.p1.Contig4, mRNA sequence	0.374567	0.588372
GO:0008104	protein localization	CK454638		915131 MARC 4PIG Sus scrofa cDNA 5', mRNA sequence	0.374567	0.588372
GO:0008104	protein localization	DN104456		1100249 MARC 4PIG Sus scrofa cDNA 5', mRNA sequence	0.374567	0.588372
GO:0048856	anatomical structure development	AF329358.1	LAMB1	Sus scrofa laminin beta-1 chain mRNA, partial cds	0.379162	0.715931
GO:0048856	anatomical structure development	AK233000.1		Sus scrofa mRNA, clone:LVRM10065H01, expressed in liver	0.379162	0.715931
GO:0048856	anatomical structure development	BX672955		BX672955 Sus Scrofa library (scac) Sus scrofa cDNA clone scac0044.o.04 5prim, mRNA sequence	0.379162	0.715931
GO:0048856	anatomical structure development	BX925993		BX925993 Sus Scrofa library (scan) Sus scrofa cDNA clone scan0021.f.19 5prim, mRNA sequence	0.379162	0.715931
GO:0048856	anatomical structure development	CN164178		994302 MARC 4PIG Sus scrofa cDNA 5', mRNA sequence	0.379162	0.715931
GO:0048856	anatomical structure development	DN128580		1142660 MARC 4PIG Sus scrofa cDNA 3', mRNA sequence	0.379162	0.715931
GO:0048856	anatomical structure development	DT324183		SusFleck_BF_0033_0036_5_pCNS_D01 SusFleck Backfat Sus scrofa cDNA clone 0033_0036_D01 5', mRNA sequence	0.379162	0.715931
GO:0048856	anatomical structure development	DV904076		POSM0605028_M02R porcine skeletal muscle cDNA library (PoSM) Sus scrofa cDNA 3', mRNA sequence	0.379162	0.715931
GO:0048856	anatomical structure development	NM_001105288.1	COL5A3	Sus scrofa collagen, type V, alpha 3 (COL5A3), mRNA	0.379162	0.715931
GO:0034660	ncRNA metabolic process	AK233966.1		Sus scrofa mRNA, clone:MLN010082C02, expressed in mesenteric lymph node	0.383611	1.9887
GO:0034660	ncRNA metabolic process	AY610143.1		Sus scrofa clone Clu_7951.scr.msk.p1.Contig1, mRNA sequence	0.383611	1.9887
GO:0034660	ncRNA metabolic process	XM_001927898.1	LOC100157624	PREDICTED: Sus scrofa similar to TSR2, 20S rRNA accumulation, homolog (S. cerevisiae) (LOC100157624), mRNA	0.383611	1.9887
GO:0006811	ion transport	AK232136.1		Sus scrofa mRNA, clone:LNG010086D03, expressed in lung	0.385226	0.33145
GO:0050790	regulation of catalytic activity	AK239728.1		Sus scrofa mRNA, clone:THY010126C02, expressed in thymus	0.390105	0.46683
GO:0050790	regulation of catalytic activity	NM_001097486.1	ATPIF1	Sus scrofa ATPase inhibitory factor 1 (ATPIF1), nuclear gene encoding mitochondrial protein, mRNA	0.390105	0.46683
GO:0006334	nucleosome assembly	BX918412		BX918412 Sus Scrofa library (scan) Sus scrofa cDNA clone scan0038.i.09 5prim, mRNA sequence	0.40066	4.51977
GO:0045103	intermediate filament-based process	AK239728.1		Sus scrofa mRNA, clone:THY010126C02, expressed in thymus	0.40066	4.51977
GO:0045104	intermediate filament cytoskeleton organization	AK239728.1		Sus scrofa mRNA, clone:THY010126C02, expressed in thymus	0.40066	4.51977
GO:0007517	muscle development	BX925993		BX925993 Sus Scrofa library (scan) Sus scrofa cDNA clone scan0021.f.19 5prim, mRNA sequence	0.404188	1.93704
GO:0007517	muscle development	DN128580		1142660 MARC 4PIG Sus scrofa cDNA 3', mRNA sequence	0.404188	1.93704
GO:0007517	muscle development	DV904076		POSM0605028_M02R porcine skeletal muscle cDNA library (PoSM) Sus scrofa cDNA 3', mRNA sequence	0.404188	1.93704
GO:0051094	positive regulation of developmental process	AK232555.1		Sus scrofa mRNA, clone:LVR010073A12, expressed in liver	0.419726	1.58336
GO:0051094	positive regulation of developmental process	BX915041		BX915041 Sus Scrofa library (scan) Sus scrofa cDNA clone scan0027.c.13 5prim, mRNA sequence	0.419726	1.58336
GO:0051094	positive regulation of developmental process	CK467405		938702 MARC 4PIG Sus scrofa cDNA 5', mRNA sequence	0.419726	1.58336
GO:0051094	positive regulation of developmental process	EW421594		rnca11b_e13.y1 nca Sus scrofa cDNA 5', mRNA sequence	0.419726	1.58336
GO:0051094	positive regulation of developmental process	XM_001925866.1	LOC100152572	PREDICTED: Sus scrofa similar to MLK-related kinase (LOC100152572), mRNA	0.419726	1.58336
GO:0008380	RNA splicing	AK236404.1		Sus scrofa mRNA, clone:OVRM10189A09, expressed in ovary	0.426901	1.57334
GO:0008380	RNA splicing	AY609798.1		Sus scrofa clone Clu_3164.scr.msk.p1.Contig1, mRNA sequence	0.426901	1.57334
GO:0008380	RNA splicing	BI182307		UNL-P-FN-bg-h-08-0-UNL.s1 UNL-P-FN Sus scrofa cDNA clone UNL-P-FN-bg-h-08-0-UNL 3', mRNA sequence	0.426901	1.57334
GO:0008380	RNA splicing	CK457656		921976 MARC 4PIG Sus scrofa cDNA 3', mRNA sequence	0.426901	1.57334
GO:0008380	RNA splicing	XM_001929236.1	LOC100157075	PREDICTED: Sus scrofa similar to snurportin 1 (LOC100157075), mRNA	0.426901	1.57334
GO:0000387	spliceosomal snRNP biogenesis	XM_001929236.1	LOC100157075	PREDICTED: Sus scrofa similar to snurportin 1 (LOC100157075), mRNA	0.432844	4.14312
GO:0001666	response to hypoxia	EW464984		rnmm24c_m17.y1 nmm Sus scrofa cDNA 5', mRNA sequence	0.432844	4.14312
GO:0002697	regulation of immune effector process	CK454638		915131 MARC 4PIG Sus scrofa cDNA 5', mRNA sequence	0.432844	4.14312
GO:0006937	regulation of muscle contraction	DV904076		POSM0605028_M02R porcine skeletal muscle cDNA library (PoSM) Sus scrofa cDNA 3', mRNA sequence	0.432844	4.14312
GO:0009953	dorsal/ventral pattern formation	BX923538		BX923538 Sus Scrofa library (scan) Sus scrofa cDNA clone scan0014.h.08 5prim, mRNA sequence	0.432844	4.14312
GO:0034329	cell junction assembly	DT324183		SusFleck_BF_0033_0036_5_pCNS_D01 SusFleck Backfat Sus scrofa cDNA clone 0033_0036_D01 5', mRNA sequence	0.432844	4.14312
GO:0042102	positive regulation of T cell proliferation	CN164178		994302 MARC 4PIG Sus scrofa cDNA 5', mRNA sequence	0.432844	4.14312
GO:0048741	skeletal muscle fiber development	BX925993		BX925993 Sus Scrofa library (scan) Sus scrofa cDNA clone scan0021.f.19 5prim, mRNA sequence	0.432844	4.14312
GO:0048747	muscle fiber development	BX925993		BX925993 Sus Scrofa library (scan) Sus scrofa cDNA clone scan0021.f.19 5prim, mRNA sequence	0.432844	4.14312
GO:0051093	negative regulation of developmental process	AK235751.1		Sus scrofa mRNA, clone:OVRM10111E07, expressed in ovary	0.435292	0.350123
GO:0044255	cellular lipid metabolic process	AK239600.1		Sus scrofa mRNA, clone:THY010115C09, expressed in thymus	0.439226	0.564971
GO:0044255	cellular lipid metabolic process	NM_213897.1	ACADL	Sus scrofa acyl-Coenzyme A dehydrogenase, long chain (ACADL), nuclear gene encoding mitochondrial protein, mRNA	0.439226	0.564971
GO:0044255	cellular lipid metabolic process	NM_214039.1	ACADM	Sus scrofa acyl-Coenzyme A dehydrogenase, C-4 to C-12 straight chain (ACADM), nuclear gene encoding mitochondrial protein, mRNA	0.439226	0.564971
GO:0000075	cell cycle checkpoint	AK234932.1		Sus scrofa mRNA, clone:OVRM10033G12, expressed in ovary	0.443085	2.25988
GO:0000075	cell cycle checkpoint	XM_001925866.1	LOC100152572	PREDICTED: Sus scrofa similar to MLK-related kinase (LOC100152572), mRNA	0.443085	2.25988
GO:0016043	cellular component organization	AF329358.1	LAMB1	Sus scrofa laminin beta-1 chain mRNA, partial cds	0.447801	1.21418
GO:0016043	cellular component organization	AK232555.1		Sus scrofa mRNA, clone:LVR010073A12, expressed in liver	0.447801	1.21418
GO:0016043	cellular component organization	AK233966.1		Sus scrofa mRNA, clone:MLN010082C02, expressed in mesenteric lymph node	0.447801	1.21418
GO:0016043	cellular component organization	AK234277.1		Sus scrofa mRNA, clone:OVR010036G03, expressed in ovary	0.447801	1.21418
GO:0016043	cellular component organization	AK234932.1		Sus scrofa mRNA, clone:OVRM10033G12, expressed in ovary	0.447801	1.21418
GO:0016043	cellular component organization	AK240563.1		Sus scrofa mRNA, clone:UTR010098F11, expressed in uterus	0.447801	1.21418
GO:0016043	cellular component organization	AY610143.1		Sus scrofa clone Clu_7951.scr.msk.p1.Contig1, mRNA sequence	0.447801	1.21418
GO:0016043	cellular component organization	BX918412		BX918412 Sus Scrofa library (scan) Sus scrofa cDNA clone scan0038.i.09 5prim, mRNA sequence	0.447801	1.21418
GO:0016043	cellular component organization	BX925993		BX925993 Sus Scrofa library (scan) Sus scrofa cDNA clone scan0021.f.19 5prim, mRNA sequence	0.447801	1.21418
GO:0016043	cellular component organization	CK454638		915131 MARC 4PIG Sus scrofa cDNA 5', mRNA sequence	0.447801	1.21418
GO:0016043	cellular component organization	DT324183		SusFleck_BF_0033_0036_5_pCNS_D01 SusFleck Backfat Sus scrofa cDNA clone 0033_0036_D01 5', mRNA sequence	0.447801	1.21418
GO:0016043	cellular component organization	DV904076		POSM0605028_M02R porcine skeletal muscle cDNA library (PoSM) Sus scrofa cDNA 3', mRNA sequence	0.447801	1.21418
GO:0016043	cellular component organization	EW055180		rpigcb_10659.y1 cty Sus scrofa cDNA 5', mRNA sequence	0.447801	1.21418
GO:0016043	cellular component organization	EW421594		rnca11b_e13.y1 nca Sus scrofa cDNA 5', mRNA sequence	0.447801	1.21418
GO:0016043	cellular component organization	NM_001097486.1	ATPIF1	Sus scrofa ATPase inhibitory factor 1 (ATPIF1), nuclear gene encoding mitochondrial protein, mRNA	0.447801	1.21418
GO:0016043	cellular component organization	NM_001105288.1	COL5A3	Sus scrofa collagen, type V, alpha 3 (COL5A3), mRNA	0.447801	1.21418
GO:0016043	cellular component organization	XM_001925866.1	LOC100152572	PREDICTED: Sus scrofa similar to MLK-related kinase (LOC100152572), mRNA	0.447801	1.21418
GO:0016043	cellular component organization	XM_001927898.1	LOC100157624	PREDICTED: Sus scrofa similar to TSR2, 20S rRNA accumulation, homolog (S. cerevisiae) (LOC100157624), mRNA	0.447801	1.21418
GO:0016043	cellular component organization	XM_001929236.1	LOC100157075	PREDICTED: Sus scrofa similar to snurportin 1 (LOC100157075), mRNA	0.447801	1.21418
GO:0007127	meiosis I	AJ950507		AJ950507 KN404_1 Sus scrofa cDNA clone C0007741i12 5', mRNA sequence	0.464382	3.82442
GO:0019362	pyridine nucleotide metabolic process	AY214329.1	LOC403161	Sus scrofa nicotinate phosphoribosyltransferase-like protein mRNA, partial cds	0.464382	3.82442
GO:0030048	actin filament-based movement	CK454645		915140 MARC 4PIG Sus scrofa cDNA 5', mRNA sequence	0.464382	3.82442
GO:0031497	chromatin assembly	BX918412		BX918412 Sus Scrofa library (scan) Sus scrofa cDNA clone scan0038.i.09 5prim, mRNA sequence	0.464382	3.82442
GO:0032946	positive regulation of mononuclear cell proliferation	CN164178		994302 MARC 4PIG Sus scrofa cDNA 5', mRNA sequence	0.464382	3.82442
GO:0034330	cell junction organization	DT324183		SusFleck_BF_0033_0036_5_pCNS_D01 SusFleck Backfat Sus scrofa cDNA clone 0033_0036_D01 5', mRNA sequence	0.464382	3.82442
GO:0050671	positive regulation of lymphocyte proliferation	CN164178		994302 MARC 4PIG Sus scrofa cDNA 5', mRNA sequence	0.464382	3.82442
GO:0008632	apoptotic program	AK232555.1		Sus scrofa mRNA, clone:LVR010073A12, expressed in liver	0.472862	2.16163
GO:0008632	apoptotic program	EW421594		rnca11b_e13.y1 nca Sus scrofa cDNA 5', mRNA sequence	0.472862	2.16163
GO:0016477	cell migration	DT324183		SusFleck_BF_0033_0036_5_pCNS_D01 SusFleck Backfat Sus scrofa cDNA clone 0033_0036_D01 5', mRNA sequence	0.472862	2.16163
GO:0016477	cell migration	XM_001927973.1	LOC100156397	PREDICTED: Sus scrofa similar to SCY1-like 3 (LOC100156397), mRNA	0.472862	2.16163
GO:0048870	cell motility	DT324183		SusFleck_BF_0033_0036_5_pCNS_D01 SusFleck Backfat Sus scrofa cDNA clone 0033_0036_D01 5', mRNA sequence	0.487793	2.11564
GO:0048870	cell motility	XM_001927973.1	LOC100156397	PREDICTED: Sus scrofa similar to SCY1-like 3 (LOC100156397), mRNA	0.487793	2.11564
GO:0009058	biosynthetic process	AK236028.1		Sus scrofa mRNA, clone:OVRM10140A03, expressed in ovary	0.492617	0.757118
GO:0009058	biosynthetic process	AK236127.1		Sus scrofa mRNA, clone:OVRM10155A01, expressed in ovary	0.492617	0.757118
GO:0009058	biosynthetic process	AK238836.1		Sus scrofa mRNA, clone:THY010035H09, expressed in thymus	0.492617	0.757118
GO:0009058	biosynthetic process	AY214329.1	LOC403161	Sus scrofa nicotinate phosphoribosyltransferase-like protein mRNA, partial cds	0.492617	0.757118
GO:0009058	biosynthetic process	BX918412		BX918412 Sus Scrofa library (scan) Sus scrofa cDNA clone scan0038.i.09 5prim, mRNA sequence	0.492617	0.757118
GO:0009058	biosynthetic process	DN123551		1123855 MARC 4PIG Sus scrofa cDNA 5', mRNA sequence	0.492617	0.757118
GO:0009058	biosynthetic process	DY405876		1497400 MARC 3PIG Sus scrofa cDNA 5', mRNA sequence	0.492617	0.757118
GO:0009058	biosynthetic process	EV928670		rche13_i19.y1 che Sus scrofa cDNA 5', mRNA sequence	0.492617	0.757118
GO:0009058	biosynthetic process	XM_001926121.1	LOC100157971	PREDICTED: Sus scrofa similar to mitochondrial ribosomal protein L52 (LOC100157971), mRNA	0.492617	0.757118
GO:0022411	cellular component disassembly	AK232555.1		Sus scrofa mRNA, clone:LVR010073A12, expressed in liver	0.495287	3.55125
GO:0030199	collagen fibril organization	NM_001105288.1	COL5A3	Sus scrofa collagen, type V, alpha 3 (COL5A3), mRNA	0.495287	3.55125
GO:0031347	regulation of defense response	CK454638		915131 MARC 4PIG Sus scrofa cDNA 5', mRNA sequence	0.495287	3.55125
GO:0051289	protein homotetramerization	NM_001097486.1	ATPIF1	Sus scrofa ATPase inhibitory factor 1 (ATPIF1), nuclear gene encoding mitochondrial protein, mRNA	0.495287	3.55125
GO:0006325	establishment or maintenance of chromatin architecture	BX918412		BX918412 Sus Scrofa library (scan) Sus scrofa cDNA clone scan0038.i.09 5prim, mRNA sequence	0.498345	0.373815
GO:0051234	establishment of localization	AK231172.1		Sus scrofa mRNA, clone:ITT010006G12, expressed in intestine	0.508101	0.830252
GO:0051234	establishment of localization	AK231733.1		Sus scrofa mRNA, clone:LNG010017B08, expressed in lung	0.508101	0.830252
GO:0051234	establishment of localization	AK232136.1		Sus scrofa mRNA, clone:LNG010086D03, expressed in lung	0.508101	0.830252
GO:0051234	establishment of localization	AK233000.1		Sus scrofa mRNA, clone:LVRM10065H01, expressed in liver	0.508101	0.830252
GO:0051234	establishment of localization	AK234277.1		Sus scrofa mRNA, clone:OVR010036G03, expressed in ovary	0.508101	0.830252
GO:0051234	establishment of localization	AK234908	LOC595127	Sus scrofa mRNA, clone:OVRM10028H08, expressed in ovary	0.508101	0.830252
GO:0051234	establishment of localization	AK236617.1		Sus scrofa mRNA, clone:OVRM10208F03, expressed in ovary	0.508101	0.830252
GO:0051234	establishment of localization	AK236637.1		Sus scrofa mRNA, clone:OVRM10210C08, expressed in ovary	0.508101	0.830252
GO:0051234	establishment of localization	AY609666.1		Sus scrofa clone Clu_24219.scr.msk.p1.Contig4, mRNA sequence	0.508101	0.830252
GO:0051234	establishment of localization	BX666658		BX666658 Sus Scrofa library (scac) Sus scrofa cDNA clone scac0025.d.07 3prim, mRNA sequence	0.508101	0.830252
GO:0051234	establishment of localization	BX925993		BX925993 Sus Scrofa library (scan) Sus scrofa cDNA clone scan0021.f.19 5prim, mRNA sequence	0.508101	0.830252
GO:0051234	establishment of localization	CK454638		915131 MARC 4PIG Sus scrofa cDNA 5', mRNA sequence	0.508101	0.830252
GO:0051234	establishment of localization	CK454645		915140 MARC 4PIG Sus scrofa cDNA 5', mRNA sequence	0.508101	0.830252
GO:0051234	establishment of localization	CN157675		946398 MARC 4PIG Sus scrofa cDNA 5', mRNA sequence	0.508101	0.830252
GO:0051234	establishment of localization	DN104456		1100249 MARC 4PIG Sus scrofa cDNA 5', mRNA sequence	0.508101	0.830252
GO:0051234	establishment of localization	DN111105		1110192 MARC 4PIG Sus scrofa cDNA 5', mRNA sequence	0.508101	0.830252
GO:0051234	establishment of localization	EV889890		rcad24b_f12.y1 cag Sus scrofa cDNA 5', mRNA sequence	0.508101	0.830252
GO:0051641	cellular localization	AK233000.1		Sus scrofa mRNA, clone:LVRM10065H01, expressed in liver	0.508595	0.681061
GO:0051641	cellular localization	AY609666.1		Sus scrofa clone Clu_24219.scr.msk.p1.Contig4, mRNA sequence	0.508595	0.681061
GO:0051641	cellular localization	BX666658		BX666658 Sus Scrofa library (scac) Sus scrofa cDNA clone scac0025.d.07 3prim, mRNA sequence	0.508595	0.681061
GO:0051641	cellular localization	CK454638		915131 MARC 4PIG Sus scrofa cDNA 5', mRNA sequence	0.508595	0.681061
GO:0051641	cellular localization	CK454645		915140 MARC 4PIG Sus scrofa cDNA 5', mRNA sequence	0.508595	0.681061
GO:0006944	membrane fusion	BX925993		BX925993 Sus Scrofa library (scan) Sus scrofa cDNA clone scan0021.f.19 5prim, mRNA sequence	0.525571	3.3145
GO:0030509	BMP signaling pathway	DN121268		1121355 MARC 4PIG Sus scrofa cDNA 3', mRNA sequence	0.525571	3.3145
GO:0034728	nucleosome organization	BX918412		BX918412 Sus Scrofa library (scan) Sus scrofa cDNA clone scan0038.i.09 5prim, mRNA sequence	0.525571	3.3145
GO:0033036	macromolecule localization	AK233000.1		Sus scrofa mRNA, clone:LVRM10065H01, expressed in liver	0.527506	0.688607
GO:0033036	macromolecule localization	AK236617.1		Sus scrofa mRNA, clone:OVRM10208F03, expressed in ovary	0.527506	0.688607
GO:0033036	macromolecule localization	AY609666.1		Sus scrofa clone Clu_24219.scr.msk.p1.Contig4, mRNA sequence	0.527506	0.688607
GO:0033036	macromolecule localization	CK454638		915131 MARC 4PIG Sus scrofa cDNA 5', mRNA sequence	0.527506	0.688607
GO:0033036	macromolecule localization	DN104456		1100249 MARC 4PIG Sus scrofa cDNA 5', mRNA sequence	0.527506	0.688607
GO:0030163	protein catabolic process	AK235390.1		Sus scrofa mRNA, clone:OVRM10075G05, expressed in ovary	0.528002	1.34892
GO:0030163	protein catabolic process	AY609666.1		Sus scrofa clone Clu_24219.scr.msk.p1.Contig4, mRNA sequence	0.528002	1.34892
GO:0030163	protein catabolic process	AY610411.1	TPRKB	Sus scrofa clone risp02_p18.y1.abd, mRNA sequence	0.528002	1.34892
GO:0030163	protein catabolic process	BX664880		BX664880 Sus Scrofa library (scag) Sus scrofa cDNA clone scag0005.d.07 5prim, mRNA sequence	0.528002	1.34892
GO:0030163	protein catabolic process	BX915041		BX915041 Sus Scrofa library (scan) Sus scrofa cDNA clone scan0027.c.13 5prim, mRNA sequence	0.528002	1.34892
GO:0030163	protein catabolic process	CJ012192		CJ012192 full-length enriched swine cDNA library, adult mesenteric lymph node Sus scrofa cDNA clone MLN01B080058 5', mRNA sequence	0.528002	1.34892
GO:0030163	protein catabolic process	DY406584		1498188 MARC 3PIG Sus scrofa cDNA 5', mRNA sequence	0.528002	1.34892
GO:0006955	immune response	CN164178		994302 MARC 4PIG Sus scrofa cDNA 5', mRNA sequence	0.528976	0.52611
GO:0006955	immune response	NM_001113706.1	SLA-DRA	Sus scrofa MHC class II DR-alpha (SLA-DRA), mRNA	0.528976	0.52611
GO:0044249	cellular biosynthetic process	AK236028.1		Sus scrofa mRNA, clone:OVRM10140A03, expressed in ovary	0.530039	0.77015
GO:0044249	cellular biosynthetic process	AK236127.1		Sus scrofa mRNA, clone:OVRM10155A01, expressed in ovary	0.530039	0.77015
GO:0044249	cellular biosynthetic process	AK238836.1		Sus scrofa mRNA, clone:THY010035H09, expressed in thymus	0.530039	0.77015
GO:0044249	cellular biosynthetic process	AY214329.1	LOC403161	Sus scrofa nicotinate phosphoribosyltransferase-like protein mRNA, partial cds	0.530039	0.77015
GO:0044249	cellular biosynthetic process	BX918412		BX918412 Sus Scrofa library (scan) Sus scrofa cDNA clone scan0038.i.09 5prim, mRNA sequence	0.530039	0.77015
GO:0044249	cellular biosynthetic process	DN123551		1123855 MARC 4PIG Sus scrofa cDNA 5', mRNA sequence	0.530039	0.77015
GO:0044249	cellular biosynthetic process	DY405876		1497400 MARC 3PIG Sus scrofa cDNA 5', mRNA sequence	0.530039	0.77015
GO:0044249	cellular biosynthetic process	EV928670		rche13_i19.y1 che Sus scrofa cDNA 5', mRNA sequence	0.530039	0.77015
GO:0044249	cellular biosynthetic process	XM_001926121.1	LOC100157971	PREDICTED: Sus scrofa similar to mitochondrial ribosomal protein L52 (LOC100157971), mRNA	0.530039	0.77015
GO:0051239	regulation of multicellular organismal process	AK232205.1		Sus scrofa mRNA, clone:LNG010103E07, expressed in lung	0.538633	1.43692
GO:0051239	regulation of multicellular organismal process	BX925993		BX925993 Sus Scrofa library (scan) Sus scrofa cDNA clone scan0021.f.19 5prim, mRNA sequence	0.538633	1.43692
GO:0051239	regulation of multicellular organismal process	CN164178		994302 MARC 4PIG Sus scrofa cDNA 5', mRNA sequence	0.538633	1.43692
GO:0051239	regulation of multicellular organismal process	DB788903		DB788903 full-length enriched swine cDNA library, adult adrenal gland Sus scrofa cDNA clone ADR010083F11 5', mRNA sequence	0.538633	1.43692
GO:0051239	regulation of multicellular organismal process	DV904076		POSM0605028_M02R porcine skeletal muscle cDNA library (PoSM) Sus scrofa cDNA 3', mRNA sequence	0.538633	1.43692
GO:0006139	nucleobase, nucleoside, nucleotide and nucleic acid metabolic process	AJ950507		AJ950507 KN404_1 Sus scrofa cDNA clone C0007741i12 5', mRNA sequence	0.540532	1.18541
GO:0006139	nucleobase, nucleoside, nucleotide and nucleic acid metabolic process	AK232555.1		Sus scrofa mRNA, clone:LVR010073A12, expressed in liver	0.540532	1.18541
GO:0006139	nucleobase, nucleoside, nucleotide and nucleic acid metabolic process	AK233966.1		Sus scrofa mRNA, clone:MLN010082C02, expressed in mesenteric lymph node	0.540532	1.18541
GO:0006139	nucleobase, nucleoside, nucleotide and nucleic acid metabolic process	AK234932.1		Sus scrofa mRNA, clone:OVRM10033G12, expressed in ovary	0.540532	1.18541
GO:0006139	nucleobase, nucleoside, nucleotide and nucleic acid metabolic process	AK236127.1		Sus scrofa mRNA, clone:OVRM10155A01, expressed in ovary	0.540532	1.18541
GO:0006139	nucleobase, nucleoside, nucleotide and nucleic acid metabolic process	AK236404.1		Sus scrofa mRNA, clone:OVRM10189A09, expressed in ovary	0.540532	1.18541
GO:0006139	nucleobase, nucleoside, nucleotide and nucleic acid metabolic process	AY214329.1	LOC403161	Sus scrofa nicotinate phosphoribosyltransferase-like protein mRNA, partial cds	0.540532	1.18541
GO:0006139	nucleobase, nucleoside, nucleotide and nucleic acid metabolic process	AY609798.1		Sus scrofa clone Clu_3164.scr.msk.p1.Contig1, mRNA sequence	0.540532	1.18541
GO:0006139	nucleobase, nucleoside, nucleotide and nucleic acid metabolic process	AY610143.1		Sus scrofa clone Clu_7951.scr.msk.p1.Contig1, mRNA sequence	0.540532	1.18541
GO:0006139	nucleobase, nucleoside, nucleotide and nucleic acid metabolic process	BI182307		UNL-P-FN-bg-h-08-0-UNL.s1 UNL-P-FN Sus scrofa cDNA clone UNL-P-FN-bg-h-08-0-UNL 3', mRNA sequence	0.540532	1.18541
GO:0006139	nucleobase, nucleoside, nucleotide and nucleic acid metabolic process	BX664880		BX664880 Sus Scrofa library (scag) Sus scrofa cDNA clone scag0005.d.07 5prim, mRNA sequence	0.540532	1.18541
GO:0006139	nucleobase, nucleoside, nucleotide and nucleic acid metabolic process	BX918412		BX918412 Sus Scrofa library (scan) Sus scrofa cDNA clone scan0038.i.09 5prim, mRNA sequence	0.540532	1.18541
GO:0006139	nucleobase, nucleoside, nucleotide and nucleic acid metabolic process	CA779561		MPL384_12_P03 MPL Sus scrofa cDNA clone pSPORT1 5', mRNA sequence	0.540532	1.18541
GO:0006139	nucleobase, nucleoside, nucleotide and nucleic acid metabolic process	CK457656		921976 MARC 4PIG Sus scrofa cDNA 3', mRNA sequence	0.540532	1.18541
GO:0006139	nucleobase, nucleoside, nucleotide and nucleic acid metabolic process	CN164178		994302 MARC 4PIG Sus scrofa cDNA 5', mRNA sequence	0.540532	1.18541
GO:0006139	nucleobase, nucleoside, nucleotide and nucleic acid metabolic process	XM_001927898.1	LOC100157624	PREDICTED: Sus scrofa similar to TSR2, 20S rRNA accumulation, homolog (S. cerevisiae) (LOC100157624), mRNA	0.540532	1.18541
GO:0006139	nucleobase, nucleoside, nucleotide and nucleic acid metabolic process	XM_001929236.1	LOC100157075	PREDICTED: Sus scrofa similar to snurportin 1 (LOC100157075), mRNA	0.540532	1.18541
GO:0044260	cellular macromolecule metabolic process	AJ950507		AJ950507 KN404_1 Sus scrofa cDNA clone C0007741i12 5', mRNA sequence	0.543986	1.11872
GO:0044260	cellular macromolecule metabolic process	AK232555.1		Sus scrofa mRNA, clone:LVR010073A12, expressed in liver	0.543986	1.11872
GO:0044260	cellular macromolecule metabolic process	AK233966.1		Sus scrofa mRNA, clone:MLN010082C02, expressed in mesenteric lymph node	0.543986	1.11872
GO:0044260	cellular macromolecule metabolic process	AK234932.1		Sus scrofa mRNA, clone:OVRM10033G12, expressed in ovary	0.543986	1.11872
GO:0044260	cellular macromolecule metabolic process	AK235390.1		Sus scrofa mRNA, clone:OVRM10075G05, expressed in ovary	0.543986	1.11872
GO:0044260	cellular macromolecule metabolic process	AK236028.1		Sus scrofa mRNA, clone:OVRM10140A03, expressed in ovary	0.543986	1.11872
GO:0044260	cellular macromolecule metabolic process	AK236127.1		Sus scrofa mRNA, clone:OVRM10155A01, expressed in ovary	0.543986	1.11872
GO:0044260	cellular macromolecule metabolic process	AK236404.1		Sus scrofa mRNA, clone:OVRM10189A09, expressed in ovary	0.543986	1.11872
GO:0044260	cellular macromolecule metabolic process	AK238836.1		Sus scrofa mRNA, clone:THY010035H09, expressed in thymus	0.543986	1.11872
GO:0044260	cellular macromolecule metabolic process	AK238982.1		Sus scrofa mRNA, clone:THY010053D09, expressed in thymus	0.543986	1.11872
GO:0044260	cellular macromolecule metabolic process	AK239728.1		Sus scrofa mRNA, clone:THY010126C02, expressed in thymus	0.543986	1.11872
GO:0044260	cellular macromolecule metabolic process	AY609666.1		Sus scrofa clone Clu_24219.scr.msk.p1.Contig4, mRNA sequence	0.543986	1.11872
GO:0044260	cellular macromolecule metabolic process	AY609798.1		Sus scrofa clone Clu_3164.scr.msk.p1.Contig1, mRNA sequence	0.543986	1.11872
GO:0044260	cellular macromolecule metabolic process	AY610143.1		Sus scrofa clone Clu_7951.scr.msk.p1.Contig1, mRNA sequence	0.543986	1.11872
GO:0044260	cellular macromolecule metabolic process	BI182307		UNL-P-FN-bg-h-08-0-UNL.s1 UNL-P-FN Sus scrofa cDNA clone UNL-P-FN-bg-h-08-0-UNL 3', mRNA sequence	0.543986	1.11872
GO:0044260	cellular macromolecule metabolic process	BX664880		BX664880 Sus Scrofa library (scag) Sus scrofa cDNA clone scag0005.d.07 5prim, mRNA sequence	0.543986	1.11872
GO:0044260	cellular macromolecule metabolic process	BX915041		BX915041 Sus Scrofa library (scan) Sus scrofa cDNA clone scan0027.c.13 5prim, mRNA sequence	0.543986	1.11872
GO:0044260	cellular macromolecule metabolic process	BX918412		BX918412 Sus Scrofa library (scan) Sus scrofa cDNA clone scan0038.i.09 5prim, mRNA sequence	0.543986	1.11872
GO:0044260	cellular macromolecule metabolic process	CJ012192		CJ012192 full-length enriched swine cDNA library, adult mesenteric lymph node Sus scrofa cDNA clone MLN01B080058 5', mRNA sequence	0.543986	1.11872
GO:0044260	cellular macromolecule metabolic process	CK453061		908745 MARC 4PIG Sus scrofa cDNA 5', mRNA sequence	0.543986	1.11872
GO:0044260	cellular macromolecule metabolic process	CK457656		921976 MARC 4PIG Sus scrofa cDNA 3', mRNA sequence	0.543986	1.11872
GO:0044260	cellular macromolecule metabolic process	CK462437		933235 MARC 4PIG Sus scrofa cDNA 3', mRNA sequence	0.543986	1.11872
GO:0044260	cellular macromolecule metabolic process	CN164178		994302 MARC 4PIG Sus scrofa cDNA 5', mRNA sequence	0.543986	1.11872
GO:0044260	cellular macromolecule metabolic process	DB788903		DB788903 full-length enriched swine cDNA library, adult adrenal gland Sus scrofa cDNA clone ADR010083F11 5', mRNA sequence	0.543986	1.11872
GO:0044260	cellular macromolecule metabolic process	DN123551		1123855 MARC 4PIG Sus scrofa cDNA 5', mRNA sequence	0.543986	1.11872
GO:0044260	cellular macromolecule metabolic process	DY405876		1497400 MARC 3PIG Sus scrofa cDNA 5', mRNA sequence	0.543986	1.11872
GO:0044260	cellular macromolecule metabolic process	DY406584		1498188 MARC 3PIG Sus scrofa cDNA 5', mRNA sequence	0.543986	1.11872
GO:0044260	cellular macromolecule metabolic process	EV869069		rpbfe0138_n6.y1 bfe Sus scrofa cDNA 5', mRNA sequence	0.543986	1.11872
GO:0044260	cellular macromolecule metabolic process	EV928670		rche13_i19.y1 che Sus scrofa cDNA 5', mRNA sequence	0.543986	1.11872
GO:0044260	cellular macromolecule metabolic process	EW290234		rjej38b_p21.y1 jej Sus scrofa cDNA 5', mRNA sequence	0.543986	1.11872
GO:0044260	cellular macromolecule metabolic process	XM_001925866.1	LOC100152572	PREDICTED: Sus scrofa similar to MLK-related kinase (LOC100152572), mRNA	0.543986	1.11872
GO:0044260	cellular macromolecule metabolic process	XM_001926121.1	LOC100157971	PREDICTED: Sus scrofa similar to mitochondrial ribosomal protein L52 (LOC100157971), mRNA	0.543986	1.11872
GO:0044260	cellular macromolecule metabolic process	XM_001927898.1	LOC100157624	PREDICTED: Sus scrofa similar to TSR2, 20S rRNA accumulation, homolog (S. cerevisiae) (LOC100157624), mRNA	0.543986	1.11872
GO:0044260	cellular macromolecule metabolic process	XM_001929236.1	LOC100157075	PREDICTED: Sus scrofa similar to snurportin 1 (LOC100157075), mRNA	0.543986	1.11872
GO:0000003	reproduction	BX672955		BX672955 Sus Scrofa library (scac) Sus scrofa cDNA clone scac0044.o.04 5prim, mRNA sequence	0.544621	0.391476
GO:0022414	reproductive process	BX672955		BX672955 Sus Scrofa library (scac) Sus scrofa cDNA clone scac0044.o.04 5prim, mRNA sequence	0.544621	0.391476
GO:0051246	regulation of protein metabolic process	AK234633.1		Sus scrofa mRNA, clone:OVR010100E10, expressed in ovary	0.544621	0.391476
GO:0006810	transport	AK231172.1		Sus scrofa mRNA, clone:ITT010006G12, expressed in intestine	0.546419	0.840992
GO:0006810	transport	AK231733.1		Sus scrofa mRNA, clone:LNG010017B08, expressed in lung	0.546419	0.840992
GO:0006810	transport	AK232136.1		Sus scrofa mRNA, clone:LNG010086D03, expressed in lung	0.546419	0.840992
GO:0006810	transport	AK233000.1		Sus scrofa mRNA, clone:LVRM10065H01, expressed in liver	0.546419	0.840992
GO:0006810	transport	AK234277.1		Sus scrofa mRNA, clone:OVR010036G03, expressed in ovary	0.546419	0.840992
GO:0006810	transport	AK234908	LOC595127	Sus scrofa mRNA, clone:OVRM10028H08, expressed in ovary	0.546419	0.840992
GO:0006810	transport	AK236617.1		Sus scrofa mRNA, clone:OVRM10208F03, expressed in ovary	0.546419	0.840992
GO:0006810	transport	AK236637.1		Sus scrofa mRNA, clone:OVRM10210C08, expressed in ovary	0.546419	0.840992
GO:0006810	transport	AY609666.1		Sus scrofa clone Clu_24219.scr.msk.p1.Contig4, mRNA sequence	0.546419	0.840992
GO:0006810	transport	BX666658		BX666658 Sus Scrofa library (scac) Sus scrofa cDNA clone scac0025.d.07 3prim, mRNA sequence	0.546419	0.840992
GO:0006810	transport	BX925993		BX925993 Sus Scrofa library (scan) Sus scrofa cDNA clone scan0021.f.19 5prim, mRNA sequence	0.546419	0.840992
GO:0006810	transport	CK454638		915131 MARC 4PIG Sus scrofa cDNA 5', mRNA sequence	0.546419	0.840992
GO:0006810	transport	CK454645		915140 MARC 4PIG Sus scrofa cDNA 5', mRNA sequence	0.546419	0.840992
GO:0006810	transport	CN157675		946398 MARC 4PIG Sus scrofa cDNA 5', mRNA sequence	0.546419	0.840992
GO:0006810	transport	DN104456		1100249 MARC 4PIG Sus scrofa cDNA 5', mRNA sequence	0.546419	0.840992
GO:0006810	transport	DN111105		1110192 MARC 4PIG Sus scrofa cDNA 5', mRNA sequence	0.546419	0.840992
GO:0006810	transport	EV889890		rcad24b_f12.y1 cag Sus scrofa cDNA 5', mRNA sequence	0.546419	0.840992
GO:0006487	protein amino acid N-linked glycosylation	AK236028.1		Sus scrofa mRNA, clone:OVRM10140A03, expressed in ovary	0.555247	3.10734
GO:0006898	receptor-mediated endocytosis	AK234277.1		Sus scrofa mRNA, clone:OVR010036G03, expressed in ovary	0.555247	3.10734
GO:0008406	gonad development	BX672955		BX672955 Sus Scrofa library (scac) Sus scrofa cDNA clone scac0044.o.04 5prim, mRNA sequence	0.555247	3.10734
GO:0042129	regulation of T cell proliferation	CN164178		994302 MARC 4PIG Sus scrofa cDNA 5', mRNA sequence	0.555247	3.10734
GO:0045137	development of primary sexual characteristics	BX672955		BX672955 Sus Scrofa library (scac) Sus scrofa cDNA clone scac0044.o.04 5prim, mRNA sequence	0.555247	3.10734
GO:0048518	positive regulation of biological process	AF329358.1	LAMB1	Sus scrofa laminin beta-1 chain mRNA, partial cds	0.556159	1.21262
GO:0048518	positive regulation of biological process	AK232555.1		Sus scrofa mRNA, clone:LVR010073A12, expressed in liver	0.556159	1.21262
GO:0048518	positive regulation of biological process	AY609666.1		Sus scrofa clone Clu_24219.scr.msk.p1.Contig4, mRNA sequence	0.556159	1.21262
GO:0048518	positive regulation of biological process	BX915041		BX915041 Sus Scrofa library (scan) Sus scrofa cDNA clone scan0027.c.13 5prim, mRNA sequence	0.556159	1.21262
GO:0048518	positive regulation of biological process	BX918412		BX918412 Sus Scrofa library (scan) Sus scrofa cDNA clone scan0038.i.09 5prim, mRNA sequence	0.556159	1.21262
GO:0048518	positive regulation of biological process	CK467405		938702 MARC 4PIG Sus scrofa cDNA 5', mRNA sequence	0.556159	1.21262
GO:0048518	positive regulation of biological process	CN164178		994302 MARC 4PIG Sus scrofa cDNA 5', mRNA sequence	0.556159	1.21262
GO:0048518	positive regulation of biological process	DN121268		1121355 MARC 4PIG Sus scrofa cDNA 3', mRNA sequence	0.556159	1.21262
GO:0048518	positive regulation of biological process	DT324183		SusFleck_BF_0033_0036_5_pCNS_D01 SusFleck Backfat Sus scrofa cDNA clone 0033_0036_D01 5', mRNA sequence	0.556159	1.21262
GO:0048518	positive regulation of biological process	EW222667		rgul0130_k18.y1 gul Sus scrofa cDNA 5', mRNA sequence	0.556159	1.21262
GO:0048518	positive regulation of biological process	EW421594		rnca11b_e13.y1 nca Sus scrofa cDNA 5', mRNA sequence	0.556159	1.21262
GO:0048518	positive regulation of biological process	EW464984		rnmm24c_m17.y1 nmm Sus scrofa cDNA 5', mRNA sequence	0.556159	1.21262
GO:0048518	positive regulation of biological process	XM_001925866.1	LOC100152572	PREDICTED: Sus scrofa similar to MLK-related kinase (LOC100152572), mRNA	0.556159	1.21262
GO:0065009	regulation of molecular function	AK239728.1		Sus scrofa mRNA, clone:THY010126C02, expressed in thymus	0.55966	0.616332
GO:0065009	regulation of molecular function	EW316148		rpldo0102_g1.y1 ldo Sus scrofa cDNA 5', mRNA sequence	0.55966	0.616332
GO:0065009	regulation of molecular function	NM_001097486.1	ATPIF1	Sus scrofa ATPase inhibitory factor 1 (ATPIF1), nuclear gene encoding mitochondrial protein, mRNA	0.55966	0.616332
GO:0045184	establishment of protein localization	AK233000.1		Sus scrofa mRNA, clone:LVRM10065H01, expressed in liver	0.562771	0.667348
GO:0045184	establishment of protein localization	AY609666.1		Sus scrofa clone Clu_24219.scr.msk.p1.Contig4, mRNA sequence	0.562771	0.667348
GO:0045184	establishment of protein localization	CK454638		915131 MARC 4PIG Sus scrofa cDNA 5', mRNA sequence	0.562771	0.667348
GO:0045184	establishment of protein localization	DN104456		1100249 MARC 4PIG Sus scrofa cDNA 5', mRNA sequence	0.562771	0.667348
GO:0015031	protein transport	AK233000.1		Sus scrofa mRNA, clone:LVRM10065H01, expressed in liver	0.573721	0.671857
GO:0015031	protein transport	AY609666.1		Sus scrofa clone Clu_24219.scr.msk.p1.Contig4, mRNA sequence	0.573721	0.671857
GO:0015031	protein transport	CK454638		915131 MARC 4PIG Sus scrofa cDNA 5', mRNA sequence	0.573721	0.671857
GO:0015031	protein transport	DN104456		1100249 MARC 4PIG Sus scrofa cDNA 5', mRNA sequence	0.573721	0.671857
GO:0065008	regulation of biological quality	AK236127.1		Sus scrofa mRNA, clone:OVRM10155A01, expressed in ovary	0.573721	0.671857
GO:0065008	regulation of biological quality	AY609666.1		Sus scrofa clone Clu_24219.scr.msk.p1.Contig4, mRNA sequence	0.573721	0.671857
GO:0065008	regulation of biological quality	DV904076		POSM0605028_M02R porcine skeletal muscle cDNA library (PoSM) Sus scrofa cDNA 3', mRNA sequence	0.573721	0.671857
GO:0065008	regulation of biological quality	EW421594		rnca11b_e13.y1 nca Sus scrofa cDNA 5', mRNA sequence	0.573721	0.671857
GO:0022403	cell cycle phase	AJ950507		AJ950507 KN404_1 Sus scrofa cDNA clone C0007741i12 5', mRNA sequence	0.576173	0.546345
GO:0022403	cell cycle phase	BX915041		BX915041 Sus Scrofa library (scan) Sus scrofa cDNA clone scan0027.c.13 5prim, mRNA sequence	0.576173	0.546345
GO:0006461	protein complex assembly	AK240563.1		Sus scrofa mRNA, clone:UTR010098F11, expressed in uterus	0.576877	1.47311
GO:0006461	protein complex assembly	DT324183		SusFleck_BF_0033_0036_5_pCNS_D01 SusFleck Backfat Sus scrofa cDNA clone 0033_0036_D01 5', mRNA sequence	0.576877	1.47311
GO:0006461	protein complex assembly	EW055180		rpigcb_10659.y1 cty Sus scrofa cDNA 5', mRNA sequence	0.576877	1.47311
GO:0006461	protein complex assembly	NM_001097486.1	ATPIF1	Sus scrofa ATPase inhibitory factor 1 (ATPIF1), nuclear gene encoding mitochondrial protein, mRNA	0.576877	1.47311
GO:0006941	striated muscle contraction	NM_213855.1	MYH7	Sus scrofa myosin, heavy chain 7, cardiac muscle, beta (MYH7), mRNA	0.584327	2.92456
GO:0009108	coenzyme biosynthetic process	AY214329.1	LOC403161	Sus scrofa nicotinate phosphoribosyltransferase-like protein mRNA, partial cds	0.584327	2.92456
GO:0032944	regulation of mononuclear cell proliferation	CN164178		994302 MARC 4PIG Sus scrofa cDNA 5', mRNA sequence	0.584327	2.92456
GO:0048608	reproductive structure development	BX672955		BX672955 Sus Scrofa library (scac) Sus scrofa cDNA clone scac0044.o.04 5prim, mRNA sequence	0.584327	2.92456
GO:0050670	regulation of lymphocyte proliferation	CN164178		994302 MARC 4PIG Sus scrofa cDNA 5', mRNA sequence	0.584327	2.92456
GO:0048193	Golgi vesicle transport	BX666658		BX666658 Sus Scrofa library (scac) Sus scrofa cDNA clone scac0025.d.07 3prim, mRNA sequence	0.592464	1.84139
GO:0048193	Golgi vesicle transport	CK454638		915131 MARC 4PIG Sus scrofa cDNA 5', mRNA sequence	0.592464	1.84139
GO:0032268	regulation of cellular protein metabolic process	AK234633.1		Sus scrofa mRNA, clone:OVR010100E10, expressed in ovary	0.59448	0.410888
GO:0051179	localization	AK231172.1		Sus scrofa mRNA, clone:ITT010006G12, expressed in intestine	0.596965	0.867669
GO:0051179	localization	AK231683.1	ARPC1B	Sus scrofa mRNA, clone:LNG010007F06, expressed in lung	0.596965	0.867669
GO:0051179	localization	AK231733.1		Sus scrofa mRNA, clone:LNG010017B08, expressed in lung	0.596965	0.867669
GO:0051179	localization	AK232136.1		Sus scrofa mRNA, clone:LNG010086D03, expressed in lung	0.596965	0.867669
GO:0051179	localization	AK233000.1		Sus scrofa mRNA, clone:LVRM10065H01, expressed in liver	0.596965	0.867669
GO:0051179	localization	AK234277.1		Sus scrofa mRNA, clone:OVR010036G03, expressed in ovary	0.596965	0.867669
GO:0051179	localization	AK234908	LOC595127	Sus scrofa mRNA, clone:OVRM10028H08, expressed in ovary	0.596965	0.867669
GO:0051179	localization	AK236617.1		Sus scrofa mRNA, clone:OVRM10208F03, expressed in ovary	0.596965	0.867669
GO:0051179	localization	AK236637.1		Sus scrofa mRNA, clone:OVRM10210C08, expressed in ovary	0.596965	0.867669
GO:0051179	localization	AY609666.1		Sus scrofa clone Clu_24219.scr.msk.p1.Contig4, mRNA sequence	0.596965	0.867669
GO:0051179	localization	BX666658		BX666658 Sus Scrofa library (scac) Sus scrofa cDNA clone scac0025.d.07 3prim, mRNA sequence	0.596965	0.867669
GO:0051179	localization	BX925993		BX925993 Sus Scrofa library (scan) Sus scrofa cDNA clone scan0021.f.19 5prim, mRNA sequence	0.596965	0.867669
GO:0051179	localization	CK454638		915131 MARC 4PIG Sus scrofa cDNA 5', mRNA sequence	0.596965	0.867669
GO:0051179	localization	CK454645		915140 MARC 4PIG Sus scrofa cDNA 5', mRNA sequence	0.596965	0.867669
GO:0051179	localization	CN157675		946398 MARC 4PIG Sus scrofa cDNA 5', mRNA sequence	0.596965	0.867669
GO:0051179	localization	DN104456		1100249 MARC 4PIG Sus scrofa cDNA 5', mRNA sequence	0.596965	0.867669
GO:0051179	localization	DN111105		1110192 MARC 4PIG Sus scrofa cDNA 5', mRNA sequence	0.596965	0.867669
GO:0051179	localization	DT324183		SusFleck_BF_0033_0036_5_pCNS_D01 SusFleck Backfat Sus scrofa cDNA clone 0033_0036_D01 5', mRNA sequence	0.596965	0.867669
GO:0051179	localization	EV889890		rcad24b_f12.y1 cag Sus scrofa cDNA 5', mRNA sequence	0.596965	0.867669
GO:0051179	localization	XM_001927973.1	LOC100156397	PREDICTED: Sus scrofa similar to SCY1-like 3 (LOC100156397), mRNA	0.596965	0.867669
GO:0022607	cellular component assembly	AK240563.1		Sus scrofa mRNA, clone:UTR010098F11, expressed in uterus	0.607348	1.31993
GO:0022607	cellular component assembly	BX918412		BX918412 Sus Scrofa library (scan) Sus scrofa cDNA clone scan0038.i.09 5prim, mRNA sequence	0.607348	1.31993
GO:0022607	cellular component assembly	DT324183		SusFleck_BF_0033_0036_5_pCNS_D01 SusFleck Backfat Sus scrofa cDNA clone 0033_0036_D01 5', mRNA sequence	0.607348	1.31993
GO:0022607	cellular component assembly	DV904076		POSM0605028_M02R porcine skeletal muscle cDNA library (PoSM) Sus scrofa cDNA 3', mRNA sequence	0.607348	1.31993
GO:0022607	cellular component assembly	EW055180		rpigcb_10659.y1 cty Sus scrofa cDNA 5', mRNA sequence	0.607348	1.31993
GO:0022607	cellular component assembly	NM_001097486.1	ATPIF1	Sus scrofa ATPase inhibitory factor 1 (ATPIF1), nuclear gene encoding mitochondrial protein, mRNA	0.607348	1.31993
GO:0007275	multicellular organismal development	AF329358.1	LAMB1	Sus scrofa laminin beta-1 chain mRNA, partial cds	0.609765	0.827475
GO:0007275	multicellular organismal development	AK233000.1		Sus scrofa mRNA, clone:LVRM10065H01, expressed in liver	0.609765	0.827475
GO:0007275	multicellular organismal development	AY610166.1		Sus scrofa clone Clu_8309.scr.msk.p1.Contig3, mRNA sequence	0.609765	0.827475
GO:0007275	multicellular organismal development	BX672955		BX672955 Sus Scrofa library (scac) Sus scrofa cDNA clone scac0044.o.04 5prim, mRNA sequence	0.609765	0.827475
GO:0007275	multicellular organismal development	BX923538		BX923538 Sus Scrofa library (scan) Sus scrofa cDNA clone scan0014.h.08 5prim, mRNA sequence	0.609765	0.827475
GO:0007275	multicellular organismal development	BX925993		BX925993 Sus Scrofa library (scan) Sus scrofa cDNA clone scan0021.f.19 5prim, mRNA sequence	0.609765	0.827475
GO:0007275	multicellular organismal development	CN164178		994302 MARC 4PIG Sus scrofa cDNA 5', mRNA sequence	0.609765	0.827475
GO:0007275	multicellular organismal development	DN118117		1117841 MARC 4PIG Sus scrofa cDNA 5', mRNA sequence	0.609765	0.827475
GO:0007275	multicellular organismal development	DN128580		1142660 MARC 4PIG Sus scrofa cDNA 3', mRNA sequence	0.609765	0.827475
GO:0007275	multicellular organismal development	DT324183		SusFleck_BF_0033_0036_5_pCNS_D01 SusFleck Backfat Sus scrofa cDNA clone 0033_0036_D01 5', mRNA sequence	0.609765	0.827475
GO:0007275	multicellular organismal development	DV904076		POSM0605028_M02R porcine skeletal muscle cDNA library (PoSM) Sus scrofa cDNA 3', mRNA sequence	0.609765	0.827475
GO:0007275	multicellular organismal development	NM_001105288.1	COL5A3	Sus scrofa collagen, type V, alpha 3 (COL5A3), mRNA	0.609765	0.827475
GO:0003007	heart morphogenesis	DV904076		POSM0605028_M02R porcine skeletal muscle cDNA library (PoSM) Sus scrofa cDNA 3', mRNA sequence	0.612823	2.76208
GO:0006302	double-strand break repair	AJ950507		AJ950507 KN404_1 Sus scrofa cDNA clone C0007741i12 5', mRNA sequence	0.612823	2.76208
GO:0042493	response to drug	AK237508.1		Sus scrofa mRNA, clone:SPL010054G05, expressed in spleen	0.612823	2.76208
GO:0007166	cell surface receptor linked signal transduction	AK235751.1		Sus scrofa mRNA, clone:OVRM10111E07, expressed in ovary	0.613218	0.688131
GO:0007166	cell surface receptor linked signal transduction	BX923538		BX923538 Sus Scrofa library (scan) Sus scrofa cDNA clone scan0014.h.08 5prim, mRNA sequence	0.613218	0.688131
GO:0007166	cell surface receptor linked signal transduction	DN121268		1121355 MARC 4PIG Sus scrofa cDNA 3', mRNA sequence	0.613218	0.688131
GO:0007166	cell surface receptor linked signal transduction	EW144888		rese17c_m9.y1 ese Sus scrofa cDNA 5', mRNA sequence	0.613218	0.688131
GO:0051649	establishment of localization in cell	AK233000.1		Sus scrofa mRNA, clone:LVRM10065H01, expressed in liver	0.613371	0.722637
GO:0051649	establishment of localization in cell	AY609666.1		Sus scrofa clone Clu_24219.scr.msk.p1.Contig4, mRNA sequence	0.613371	0.722637
GO:0051649	establishment of localization in cell	BX666658		BX666658 Sus Scrofa library (scac) Sus scrofa cDNA clone scac0025.d.07 3prim, mRNA sequence	0.613371	0.722637
GO:0051649	establishment of localization in cell	CK454638		915131 MARC 4PIG Sus scrofa cDNA 5', mRNA sequence	0.613371	0.722637
GO:0051649	establishment of localization in cell	CK454645		915140 MARC 4PIG Sus scrofa cDNA 5', mRNA sequence	0.613371	0.722637
GO:0055114	oxidation reduction	AK231172.1		Sus scrofa mRNA, clone:ITT010006G12, expressed in intestine	0.61522	1.2547
GO:0055114	oxidation reduction	AK231733.1		Sus scrofa mRNA, clone:LNG010017B08, expressed in lung	0.61522	1.2547
GO:0055114	oxidation reduction	AK236637.1		Sus scrofa mRNA, clone:OVRM10210C08, expressed in ovary	0.61522	1.2547
GO:0055114	oxidation reduction	BX668548		BX668548 Sus Scrofa library (scac) Sus scrofa cDNA clone scac0029.i.17 5prim, mRNA sequence	0.61522	1.2547
GO:0055114	oxidation reduction	CN157675		946398 MARC 4PIG Sus scrofa cDNA 5', mRNA sequence	0.61522	1.2547
GO:0055114	oxidation reduction	DN111105		1110192 MARC 4PIG Sus scrofa cDNA 5', mRNA sequence	0.61522	1.2547
GO:0055114	oxidation reduction	NM_213897.1	ACADL	Sus scrofa acyl-Coenzyme A dehydrogenase, long chain (ACADL), nuclear gene encoding mitochondrial protein, mRNA	0.61522	1.2547
GO:0055114	oxidation reduction	XM_001929074.1	LOC100156930	PREDICTED: Sus scrofa similar to Zinc binding alcohol dehydrogenase, domain containing 1 (LOC100156930), mRNA	0.61522	1.2547
GO:0006812	cation transport	AK232136.1		Sus scrofa mRNA, clone:LNG010086D03, expressed in lung	0.620801	0.421334
GO:0016192	vesicle-mediated transport	AK234277.1		Sus scrofa mRNA, clone:OVR010036G03, expressed in ovary	0.621886	0.642898
GO:0016192	vesicle-mediated transport	BX666658		BX666658 Sus Scrofa library (scac) Sus scrofa cDNA clone scac0025.d.07 3prim, mRNA sequence	0.621886	0.642898
GO:0016192	vesicle-mediated transport	CK454638		915131 MARC 4PIG Sus scrofa cDNA 5', mRNA sequence	0.621886	0.642898
GO:0016310	phosphorylation	AK238982.1		Sus scrofa mRNA, clone:THY010053D09, expressed in thymus	0.628369	0.645681
GO:0016310	phosphorylation	DB788903		DB788903 full-length enriched swine cDNA library, adult adrenal gland Sus scrofa cDNA clone ADR010083F11 5', mRNA sequence	0.628369	0.645681
GO:0016310	phosphorylation	XM_001925866.1	LOC100152572	PREDICTED: Sus scrofa similar to MLK-related kinase (LOC100152572), mRNA	0.628369	0.645681
GO:0006259	DNA metabolic process	AJ950507		AJ950507 KN404_1 Sus scrofa cDNA clone C0007741i12 5', mRNA sequence	0.628418	1.30264
GO:0006259	DNA metabolic process	AK232555.1		Sus scrofa mRNA, clone:LVR010073A12, expressed in liver	0.628418	1.30264
GO:0006259	DNA metabolic process	AK234932.1		Sus scrofa mRNA, clone:OVRM10033G12, expressed in ovary	0.628418	1.30264
GO:0006259	DNA metabolic process	BX664880		BX664880 Sus Scrofa library (scag) Sus scrofa cDNA clone scag0005.d.07 5prim, mRNA sequence	0.628418	1.30264
GO:0006259	DNA metabolic process	BX918412		BX918412 Sus Scrofa library (scan) Sus scrofa cDNA clone scan0038.i.09 5prim, mRNA sequence	0.628418	1.30264
GO:0006259	DNA metabolic process	CN164178		994302 MARC 4PIG Sus scrofa cDNA 5', mRNA sequence	0.628418	1.30264
GO:0006950	response to stress	AJ950507		AJ950507 KN404_1 Sus scrofa cDNA clone C0007741i12 5', mRNA sequence	0.628782	1.1861
GO:0006950	response to stress	AK232205.1		Sus scrofa mRNA, clone:LNG010103E07, expressed in lung	0.628782	1.1861
GO:0006950	response to stress	AK232277.1		Sus scrofa mRNA, clone:LVR010010H09, expressed in liver	0.628782	1.1861
GO:0006950	response to stress	AK232555.1		Sus scrofa mRNA, clone:LVR010073A12, expressed in liver	0.628782	1.1861
GO:0006950	response to stress	AK234533.1		Sus scrofa mRNA, clone:OVR010076H11, expressed in ovary	0.628782	1.1861
GO:0006950	response to stress	AK234932.1		Sus scrofa mRNA, clone:OVRM10033G12, expressed in ovary	0.628782	1.1861
GO:0006950	response to stress	AK236127.1		Sus scrofa mRNA, clone:OVRM10155A01, expressed in ovary	0.628782	1.1861
GO:0006950	response to stress	AK238982.1		Sus scrofa mRNA, clone:THY010053D09, expressed in thymus	0.628782	1.1861
GO:0006950	response to stress	AK239728.1		Sus scrofa mRNA, clone:THY010126C02, expressed in thymus	0.628782	1.1861
GO:0006950	response to stress	AY609666.1		Sus scrofa clone Clu_24219.scr.msk.p1.Contig4, mRNA sequence	0.628782	1.1861
GO:0006950	response to stress	BX664880		BX664880 Sus Scrofa library (scag) Sus scrofa cDNA clone scag0005.d.07 5prim, mRNA sequence	0.628782	1.1861
GO:0006950	response to stress	EW464984		rnmm24c_m17.y1 nmm Sus scrofa cDNA 5', mRNA sequence	0.628782	1.1861
GO:0030029	actin filament-based process	AK237923.1		Sus scrofa mRNA, clone:TCH010013E08, expressed in trachea	0.630787	1.52196
GO:0030029	actin filament-based process	CK454645		915140 MARC 4PIG Sus scrofa cDNA 5', mRNA sequence	0.630787	1.52196
GO:0030029	actin filament-based process	DV904076		POSM0605028_M02R porcine skeletal muscle cDNA library (PoSM) Sus scrofa cDNA 3', mRNA sequence	0.630787	1.52196
GO:0033554	cellular response to stress	AJ950507		AJ950507 KN404_1 Sus scrofa cDNA clone C0007741i12 5', mRNA sequence	0.639979	1.33649
GO:0033554	cellular response to stress	AK232555.1		Sus scrofa mRNA, clone:LVR010073A12, expressed in liver	0.639979	1.33649
GO:0033554	cellular response to stress	AK234932.1		Sus scrofa mRNA, clone:OVRM10033G12, expressed in ovary	0.639979	1.33649
GO:0033554	cellular response to stress	AY609666.1		Sus scrofa clone Clu_24219.scr.msk.p1.Contig4, mRNA sequence	0.639979	1.33649
GO:0033554	cellular response to stress	BX664880		BX664880 Sus Scrofa library (scag) Sus scrofa cDNA clone scag0005.d.07 5prim, mRNA sequence	0.639979	1.33649
GO:0008624	induction of apoptosis by extracellular signals	EW421594		rnca11b_e13.y1 nca Sus scrofa cDNA 5', mRNA sequence	0.640746	2.61671
GO:0030239	myofibril assembly	DV904076		POSM0605028_M02R porcine skeletal muscle cDNA library (PoSM) Sus scrofa cDNA 3', mRNA sequence	0.640746	2.61671
GO:0055001	muscle cell development	DV904076		POSM0605028_M02R porcine skeletal muscle cDNA library (PoSM) Sus scrofa cDNA 3', mRNA sequence	0.640746	2.61671
GO:0055002	striated muscle cell development	DV904076		POSM0605028_M02R porcine skeletal muscle cDNA library (PoSM) Sus scrofa cDNA 3', mRNA sequence	0.640746	2.61671
GO:0006631	fatty acid metabolic process	AK239600.1		Sus scrofa mRNA, clone:THY010115C09, expressed in thymus	0.641809	1.50659
GO:0006631	fatty acid metabolic process	NM_213897.1	ACADL	Sus scrofa acyl-Coenzyme A dehydrogenase, long chain (ACADL), nuclear gene encoding mitochondrial protein, mRNA	0.641809	1.50659
GO:0006631	fatty acid metabolic process	NM_214039.1	ACADM	Sus scrofa acyl-Coenzyme A dehydrogenase, C-4 to C-12 straight chain (ACADM), nuclear gene encoding mitochondrial protein, mRNA	0.641809	1.50659
GO:0032879	regulation of localization	AF329358.1	LAMB1	Sus scrofa laminin beta-1 chain mRNA, partial cds	0.657377	0.436118
GO:0042221	response to chemical stimulus	AK232205.1		Sus scrofa mRNA, clone:LNG010103E07, expressed in lung	0.663723	1.31528
GO:0042221	response to chemical stimulus	AK234533.1		Sus scrofa mRNA, clone:OVR010076H11, expressed in ovary	0.663723	1.31528
GO:0042221	response to chemical stimulus	AK237508.1		Sus scrofa mRNA, clone:SPL010054G05, expressed in spleen	0.663723	1.31528
GO:0042221	response to chemical stimulus	AK239728.1		Sus scrofa mRNA, clone:THY010126C02, expressed in thymus	0.663723	1.31528
GO:0042221	response to chemical stimulus	AY609666.1		Sus scrofa clone Clu_24219.scr.msk.p1.Contig4, mRNA sequence	0.663723	1.31528
GO:0009888	tissue development	DT324183		SusFleck_BF_0033_0036_5_pCNS_D01 SusFleck Backfat Sus scrofa cDNA clone 0033_0036_D01 5', mRNA sequence	0.666645	1.68534
GO:0009888	tissue development	NM_001105288.1	COL5A3	Sus scrofa collagen, type V, alpha 3 (COL5A3), mRNA	0.666645	1.68534
GO:0006733	oxidoreduction coenzyme metabolic process	AY214329.1	LOC403161	Sus scrofa nicotinate phosphoribosyltransferase-like protein mRNA, partial cds	0.668109	2.48587
GO:0006767	water-soluble vitamin metabolic process	AY214329.1	LOC403161	Sus scrofa nicotinate phosphoribosyltransferase-like protein mRNA, partial cds	0.668109	2.48587
GO:0031032	actomyosin structure organization	DV904076		POSM0605028_M02R porcine skeletal muscle cDNA library (PoSM) Sus scrofa cDNA 3', mRNA sequence	0.668109	2.48587
GO:0050870	positive regulation of T cell activation	CN164178		994302 MARC 4PIG Sus scrofa cDNA 5', mRNA sequence	0.668109	2.48587
GO:0051146	striated muscle cell differentiation	DV904076		POSM0605028_M02R porcine skeletal muscle cDNA library (PoSM) Sus scrofa cDNA 3', mRNA sequence	0.668109	2.48587
GO:0006928	cell motion	AK231683.1	ARPC1B	Sus scrofa mRNA, clone:LNG010007F06, expressed in lung	0.674876	1.46228
GO:0006928	cell motion	DT324183		SusFleck_BF_0033_0036_5_pCNS_D01 SusFleck Backfat Sus scrofa cDNA clone 0033_0036_D01 5', mRNA sequence	0.674876	1.46228
GO:0006928	cell motion	XM_001927973.1	LOC100156397	PREDICTED: Sus scrofa similar to SCY1-like 3 (LOC100156397), mRNA	0.674876	1.46228
GO:0051674	localization of cell	AK231683.1	ARPC1B	Sus scrofa mRNA, clone:LNG010007F06, expressed in lung	0.674876	1.46228
GO:0051674	localization of cell	DT324183		SusFleck_BF_0033_0036_5_pCNS_D01 SusFleck Backfat Sus scrofa cDNA clone 0033_0036_D01 5', mRNA sequence	0.674876	1.46228
GO:0051674	localization of cell	XM_001927973.1	LOC100156397	PREDICTED: Sus scrofa similar to SCY1-like 3 (LOC100156397), mRNA	0.674876	1.46228
GO:0034621	cellular macromolecular complex subunit organization	BX918412		BX918412 Sus Scrofa library (scan) Sus scrofa cDNA clone scan0038.i.09 5prim, mRNA sequence	0.67631	0.443906
GO:0006629	lipid metabolic process	AK230638.1	LOC100157274	Sus scrofa mRNA, clone:AMP010019E02, expressed in alveolar macrophage	0.67927	0.748757
GO:0006629	lipid metabolic process	AK239600.1		Sus scrofa mRNA, clone:THY010115C09, expressed in thymus	0.67927	0.748757
GO:0006629	lipid metabolic process	NM_213897.1	ACADL	Sus scrofa acyl-Coenzyme A dehydrogenase, long chain (ACADL), nuclear gene encoding mitochondrial protein, mRNA	0.67927	0.748757
GO:0006629	lipid metabolic process	NM_214039.1	ACADM	Sus scrofa acyl-Coenzyme A dehydrogenase, C-4 to C-12 straight chain (ACADM), nuclear gene encoding mitochondrial protein, mRNA	0.67927	0.748757
GO:0006629	lipid metabolic process	NM_214052.1	PLCD4	Sus scrofa phospholipase C, delta 4 (PLCD4), mRNA	0.67927	0.748757
GO:0000082	G1/S transition of mitotic cell cycle	BX915041		BX915041 Sus Scrofa library (scan) Sus scrofa cDNA clone scan0027.c.13 5prim, mRNA sequence	0.694922	2.3675
GO:0006308	DNA catabolic process	AK232555.1		Sus scrofa mRNA, clone:LVR010073A12, expressed in liver	0.694922	2.3675
GO:0006333	chromatin assembly or disassembly	BX918412		BX918412 Sus Scrofa library (scan) Sus scrofa cDNA clone scan0038.i.09 5prim, mRNA sequence	0.694922	2.3675
GO:0007548	sex differentiation	BX672955		BX672955 Sus Scrofa library (scac) Sus scrofa cDNA clone scac0044.o.04 5prim, mRNA sequence	0.694922	2.3675
GO:0007596	blood coagulation	AK236127.1		Sus scrofa mRNA, clone:OVRM10155A01, expressed in ovary	0.694922	2.3675
GO:0008544	epidermis development	NM_001105288.1	COL5A3	Sus scrofa collagen, type V, alpha 3 (COL5A3), mRNA	0.694922	2.3675
GO:0050817	coagulation	AK236127.1		Sus scrofa mRNA, clone:OVRM10155A01, expressed in ovary	0.694922	2.3675
GO:0051716	cellular response to stimulus	AJ950507		AJ950507 KN404_1 Sus scrofa cDNA clone C0007741i12 5', mRNA sequence	0.719395	1.2683
GO:0051716	cellular response to stimulus	AK232555.1		Sus scrofa mRNA, clone:LVR010073A12, expressed in liver	0.719395	1.2683
GO:0051716	cellular response to stimulus	AK234932.1		Sus scrofa mRNA, clone:OVRM10033G12, expressed in ovary	0.719395	1.2683
GO:0051716	cellular response to stimulus	AY609666.1		Sus scrofa clone Clu_24219.scr.msk.p1.Contig4, mRNA sequence	0.719395	1.2683
GO:0051716	cellular response to stimulus	BX664880		BX664880 Sus Scrofa library (scag) Sus scrofa cDNA clone scag0005.d.07 5prim, mRNA sequence	0.719395	1.2683
GO:0051056	regulation of small GTPase mediated signal transduction	DB788903		DB788903 full-length enriched swine cDNA library, adult adrenal gland Sus scrofa cDNA clone ADR010083F11 5', mRNA sequence	0.721196	2.25988
GO:0051251	positive regulation of lymphocyte activation	CN164178		994302 MARC 4PIG Sus scrofa cDNA 5', mRNA sequence	0.721196	2.25988
GO:0000377	RNA splicing, via transesterification reactions with bulged adenosine as nucleophile	AK236404.1		Sus scrofa mRNA, clone:OVRM10189A09, expressed in ovary	0.725175	1.57833
GO:0000377	RNA splicing, via transesterification reactions with bulged adenosine as nucleophile	XM_001929236.1	LOC100157075	PREDICTED: Sus scrofa similar to snurportin 1 (LOC100157075), mRNA	0.725175	1.57833
GO:0000398	nuclear mRNA splicing, via spliceosome	AK236404.1		Sus scrofa mRNA, clone:OVRM10189A09, expressed in ovary	0.725175	1.57833
GO:0000398	nuclear mRNA splicing, via spliceosome	XM_001929236.1	LOC100157075	PREDICTED: Sus scrofa similar to snurportin 1 (LOC100157075), mRNA	0.725175	1.57833
GO:0051336	regulation of hydrolase activity	AK239728.1		Sus scrofa mRNA, clone:THY010126C02, expressed in thymus	0.725175	1.57833
GO:0051336	regulation of hydrolase activity	NM_001097486.1	ATPIF1	Sus scrofa ATPase inhibitory factor 1 (ATPIF1), nuclear gene encoding mitochondrial protein, mRNA	0.725175	1.57833
GO:0034622	cellular macromolecular complex assembly	BX918412		BX918412 Sus Scrofa library (scan) Sus scrofa cDNA clone scan0038.i.09 5prim, mRNA sequence	0.725552	0.464649
GO:0065003	macromolecular complex assembly	AK240563.1		Sus scrofa mRNA, clone:UTR010098F11, expressed in uterus	0.727366	1.26186
GO:0065003	macromolecular complex assembly	BX918412		BX918412 Sus Scrofa library (scan) Sus scrofa cDNA clone scan0038.i.09 5prim, mRNA sequence	0.727366	1.26186
GO:0065003	macromolecular complex assembly	DT324183		SusFleck_BF_0033_0036_5_pCNS_D01 SusFleck Backfat Sus scrofa cDNA clone 0033_0036_D01 5', mRNA sequence	0.727366	1.26186
GO:0065003	macromolecular complex assembly	EW055180		rpigcb_10659.y1 cty Sus scrofa cDNA 5', mRNA sequence	0.727366	1.26186
GO:0065003	macromolecular complex assembly	NM_001097486.1	ATPIF1	Sus scrofa ATPase inhibitory factor 1 (ATPIF1), nuclear gene encoding mitochondrial protein, mRNA	0.727366	1.26186
GO:0009893	positive regulation of metabolic process	CN164178		994302 MARC 4PIG Sus scrofa cDNA 5', mRNA sequence	0.738492	0.693732
GO:0009893	positive regulation of metabolic process	DN121268		1121355 MARC 4PIG Sus scrofa cDNA 3', mRNA sequence	0.738492	0.693732
GO:0009893	positive regulation of metabolic process	EW464984		rnmm24c_m17.y1 nmm Sus scrofa cDNA 5', mRNA sequence	0.738492	0.693732
GO:0000375	RNA splicing, via transesterification reactions	AK236404.1		Sus scrofa mRNA, clone:OVRM10189A09, expressed in ovary	0.739661	1.55367
GO:0000375	RNA splicing, via transesterification reactions	XM_001929236.1	LOC100157075	PREDICTED: Sus scrofa similar to snurportin 1 (LOC100157075), mRNA	0.739661	1.55367
GO:0048731	system development	AF329358.1	LAMB1	Sus scrofa laminin beta-1 chain mRNA, partial cds	0.743854	0.842668
GO:0048731	system development	AK233000.1		Sus scrofa mRNA, clone:LVRM10065H01, expressed in liver	0.743854	0.842668
GO:0048731	system development	BX672955		BX672955 Sus Scrofa library (scac) Sus scrofa cDNA clone scac0044.o.04 5prim, mRNA sequence	0.743854	0.842668
GO:0048731	system development	BX925993		BX925993 Sus Scrofa library (scan) Sus scrofa cDNA clone scan0021.f.19 5prim, mRNA sequence	0.743854	0.842668
GO:0048731	system development	CN164178		994302 MARC 4PIG Sus scrofa cDNA 5', mRNA sequence	0.743854	0.842668
GO:0048731	system development	DN128580		1142660 MARC 4PIG Sus scrofa cDNA 3', mRNA sequence	0.743854	0.842668
GO:0048731	system development	DT324183		SusFleck_BF_0033_0036_5_pCNS_D01 SusFleck Backfat Sus scrofa cDNA clone 0033_0036_D01 5', mRNA sequence	0.743854	0.842668
GO:0048731	system development	DV904076		POSM0605028_M02R porcine skeletal muscle cDNA library (PoSM) Sus scrofa cDNA 3', mRNA sequence	0.743854	0.842668
GO:0048731	system development	NM_001105288.1	COL5A3	Sus scrofa collagen, type V, alpha 3 (COL5A3), mRNA	0.743854	0.842668
GO:0007599	hemostasis	AK236127.1		Sus scrofa mRNA, clone:OVRM10155A01, expressed in ovary	0.746943	2.16163
GO:0030335	positive regulation of cell migration	AF329358.1	LAMB1	Sus scrofa laminin beta-1 chain mRNA, partial cds	0.746943	2.16163
GO:0040029	regulation of gene expression, epigenetic	EW316148		rpldo0102_g1.y1 ldo Sus scrofa cDNA 5', mRNA sequence	0.746943	2.16163
GO:0051090	regulation of transcription factor activity	EW316148		rpldo0102_g1.y1 ldo Sus scrofa cDNA 5', mRNA sequence	0.746943	2.16163
GO:0051262	protein tetramerization	NM_001097486.1	ATPIF1	Sus scrofa ATPase inhibitory factor 1 (ATPIF1), nuclear gene encoding mitochondrial protein, mRNA	0.746943	2.16163
GO:0006511	ubiquitin-dependent protein catabolic process	AK235390.1		Sus scrofa mRNA, clone:OVRM10075G05, expressed in ovary	0.756644	1.20771
GO:0006511	ubiquitin-dependent protein catabolic process	AY609666.1		Sus scrofa clone Clu_24219.scr.msk.p1.Contig4, mRNA sequence	0.756644	1.20771
GO:0006511	ubiquitin-dependent protein catabolic process	BX664880		BX664880 Sus Scrofa library (scag) Sus scrofa cDNA clone scag0005.d.07 5prim, mRNA sequence	0.756644	1.20771
GO:0006511	ubiquitin-dependent protein catabolic process	BX915041		BX915041 Sus Scrofa library (scan) Sus scrofa cDNA clone scan0027.c.13 5prim, mRNA sequence	0.756644	1.20771
GO:0006511	ubiquitin-dependent protein catabolic process	CJ012192		CJ012192 full-length enriched swine cDNA library, adult mesenteric lymph node Sus scrofa cDNA clone MLN01B080058 5', mRNA sequence	0.756644	1.20771
GO:0006511	ubiquitin-dependent protein catabolic process	DY406584		1498188 MARC 3PIG Sus scrofa cDNA 5', mRNA sequence	0.756644	1.20771
GO:0019941	modification-dependent protein catabolic process	AK235390.1		Sus scrofa mRNA, clone:OVRM10075G05, expressed in ovary	0.756644	1.20771
GO:0019941	modification-dependent protein catabolic process	AY609666.1		Sus scrofa clone Clu_24219.scr.msk.p1.Contig4, mRNA sequence	0.756644	1.20771
GO:0019941	modification-dependent protein catabolic process	BX664880		BX664880 Sus Scrofa library (scag) Sus scrofa cDNA clone scag0005.d.07 5prim, mRNA sequence	0.756644	1.20771
GO:0019941	modification-dependent protein catabolic process	BX915041		BX915041 Sus Scrofa library (scan) Sus scrofa cDNA clone scan0027.c.13 5prim, mRNA sequence	0.756644	1.20771
GO:0019941	modification-dependent protein catabolic process	CJ012192		CJ012192 full-length enriched swine cDNA library, adult mesenteric lymph node Sus scrofa cDNA clone MLN01B080058 5', mRNA sequence	0.756644	1.20771
GO:0019941	modification-dependent protein catabolic process	DY406584		1498188 MARC 3PIG Sus scrofa cDNA 5', mRNA sequence	0.756644	1.20771
GO:0043632	modification-dependent macromolecule catabolic process	AK235390.1		Sus scrofa mRNA, clone:OVRM10075G05, expressed in ovary	0.756644	1.20771
GO:0043632	modification-dependent macromolecule catabolic process	AY609666.1		Sus scrofa clone Clu_24219.scr.msk.p1.Contig4, mRNA sequence	0.756644	1.20771
GO:0043632	modification-dependent macromolecule catabolic process	BX664880		BX664880 Sus Scrofa library (scag) Sus scrofa cDNA clone scag0005.d.07 5prim, mRNA sequence	0.756644	1.20771
GO:0043632	modification-dependent macromolecule catabolic process	BX915041		BX915041 Sus Scrofa library (scan) Sus scrofa cDNA clone scan0027.c.13 5prim, mRNA sequence	0.756644	1.20771
GO:0043632	modification-dependent macromolecule catabolic process	CJ012192		CJ012192 full-length enriched swine cDNA library, adult mesenteric lymph node Sus scrofa cDNA clone MLN01B080058 5', mRNA sequence	0.756644	1.20771
GO:0043632	modification-dependent macromolecule catabolic process	DY406584		1498188 MARC 3PIG Sus scrofa cDNA 5', mRNA sequence	0.756644	1.20771
GO:0044257	cellular protein catabolic process	AK235390.1		Sus scrofa mRNA, clone:OVRM10075G05, expressed in ovary	0.756644	1.20771
GO:0044257	cellular protein catabolic process	AY609666.1		Sus scrofa clone Clu_24219.scr.msk.p1.Contig4, mRNA sequence	0.756644	1.20771
GO:0044257	cellular protein catabolic process	BX664880		BX664880 Sus Scrofa library (scag) Sus scrofa cDNA clone scag0005.d.07 5prim, mRNA sequence	0.756644	1.20771
GO:0044257	cellular protein catabolic process	BX915041		BX915041 Sus Scrofa library (scan) Sus scrofa cDNA clone scan0027.c.13 5prim, mRNA sequence	0.756644	1.20771
GO:0044257	cellular protein catabolic process	CJ012192		CJ012192 full-length enriched swine cDNA library, adult mesenteric lymph node Sus scrofa cDNA clone MLN01B080058 5', mRNA sequence	0.756644	1.20771
GO:0044257	cellular protein catabolic process	DY406584		1498188 MARC 3PIG Sus scrofa cDNA 5', mRNA sequence	0.756644	1.20771
GO:0051603	proteolysis involved in cellular protein catabolic process	AK235390.1		Sus scrofa mRNA, clone:OVRM10075G05, expressed in ovary	0.756644	1.20771
GO:0051603	proteolysis involved in cellular protein catabolic process	AY609666.1		Sus scrofa clone Clu_24219.scr.msk.p1.Contig4, mRNA sequence	0.756644	1.20771
GO:0051603	proteolysis involved in cellular protein catabolic process	BX664880		BX664880 Sus Scrofa library (scag) Sus scrofa cDNA clone scag0005.d.07 5prim, mRNA sequence	0.756644	1.20771
GO:0051603	proteolysis involved in cellular protein catabolic process	BX915041		BX915041 Sus Scrofa library (scan) Sus scrofa cDNA clone scan0027.c.13 5prim, mRNA sequence	0.756644	1.20771
GO:0051603	proteolysis involved in cellular protein catabolic process	CJ012192		CJ012192 full-length enriched swine cDNA library, adult mesenteric lymph node Sus scrofa cDNA clone MLN01B080058 5', mRNA sequence	0.756644	1.20771
GO:0051603	proteolysis involved in cellular protein catabolic process	DY406584		1498188 MARC 3PIG Sus scrofa cDNA 5', mRNA sequence	0.756644	1.20771
GO:0019538	protein metabolic process	AK235390.1		Sus scrofa mRNA, clone:OVRM10075G05, expressed in ovary	0.759553	1.0891
GO:0019538	protein metabolic process	AK236028.1		Sus scrofa mRNA, clone:OVRM10140A03, expressed in ovary	0.759553	1.0891
GO:0019538	protein metabolic process	AK236127.1		Sus scrofa mRNA, clone:OVRM10155A01, expressed in ovary	0.759553	1.0891
GO:0019538	protein metabolic process	AK238836.1		Sus scrofa mRNA, clone:THY010035H09, expressed in thymus	0.759553	1.0891
GO:0019538	protein metabolic process	AK238982.1		Sus scrofa mRNA, clone:THY010053D09, expressed in thymus	0.759553	1.0891
GO:0019538	protein metabolic process	AK239728.1		Sus scrofa mRNA, clone:THY010126C02, expressed in thymus	0.759553	1.0891
GO:0019538	protein metabolic process	AY609666.1		Sus scrofa clone Clu_24219.scr.msk.p1.Contig4, mRNA sequence	0.759553	1.0891
GO:0019538	protein metabolic process	AY610411.1	TPRKB	Sus scrofa clone risp02_p18.y1.abd, mRNA sequence	0.759553	1.0891
GO:0019538	protein metabolic process	BX664880		BX664880 Sus Scrofa library (scag) Sus scrofa cDNA clone scag0005.d.07 5prim, mRNA sequence	0.759553	1.0891
GO:0019538	protein metabolic process	BX915041		BX915041 Sus Scrofa library (scan) Sus scrofa cDNA clone scan0027.c.13 5prim, mRNA sequence	0.759553	1.0891
GO:0019538	protein metabolic process	CJ012192		CJ012192 full-length enriched swine cDNA library, adult mesenteric lymph node Sus scrofa cDNA clone MLN01B080058 5', mRNA sequence	0.759553	1.0891
GO:0019538	protein metabolic process	CK462437		933235 MARC 4PIG Sus scrofa cDNA 3', mRNA sequence	0.759553	1.0891
GO:0019538	protein metabolic process	DB788903		DB788903 full-length enriched swine cDNA library, adult adrenal gland Sus scrofa cDNA clone ADR010083F11 5', mRNA sequence	0.759553	1.0891
GO:0019538	protein metabolic process	DN123551		1123855 MARC 4PIG Sus scrofa cDNA 5', mRNA sequence	0.759553	1.0891
GO:0019538	protein metabolic process	DY405876		1497400 MARC 3PIG Sus scrofa cDNA 5', mRNA sequence	0.759553	1.0891
GO:0019538	protein metabolic process	DY406584		1498188 MARC 3PIG Sus scrofa cDNA 5', mRNA sequence	0.759553	1.0891
GO:0019538	protein metabolic process	EV928670		rche13_i19.y1 che Sus scrofa cDNA 5', mRNA sequence	0.759553	1.0891
GO:0019538	protein metabolic process	EW290234		rjej38b_p21.y1 jej Sus scrofa cDNA 5', mRNA sequence	0.759553	1.0891
GO:0019538	protein metabolic process	XM_001925866.1	LOC100152572	PREDICTED: Sus scrofa similar to MLK-related kinase (LOC100152572), mRNA	0.759553	1.0891
GO:0019538	protein metabolic process	XM_001926121.1	LOC100157971	PREDICTED: Sus scrofa similar to mitochondrial ribosomal protein L52 (LOC100157971), mRNA	0.759553	1.0891
GO:0031325	positive regulation of cellular metabolic process	CN164178		994302 MARC 4PIG Sus scrofa cDNA 5', mRNA sequence	0.760457	0.703549
GO:0031325	positive regulation of cellular metabolic process	DN121268		1121355 MARC 4PIG Sus scrofa cDNA 3', mRNA sequence	0.760457	0.703549
GO:0031325	positive regulation of cellular metabolic process	EW464984		rnmm24c_m17.y1 nmm Sus scrofa cDNA 5', mRNA sequence	0.760457	0.703549
GO:0050896	response to stimulus	AJ950507		AJ950507 KN404_1 Sus scrofa cDNA clone C0007741i12 5', mRNA sequence	0.763793	1.09403
GO:0050896	response to stimulus	AK230570.1	LOC100152238	Sus scrofa mRNA, clone:AMP010011B05, expressed in alveolar macrophage	0.763793	1.09403
GO:0050896	response to stimulus	AK232205.1		Sus scrofa mRNA, clone:LNG010103E07, expressed in lung	0.763793	1.09403
GO:0050896	response to stimulus	AK232277.1		Sus scrofa mRNA, clone:LVR010010H09, expressed in liver	0.763793	1.09403
GO:0050896	response to stimulus	AK232555.1		Sus scrofa mRNA, clone:LVR010073A12, expressed in liver	0.763793	1.09403
GO:0050896	response to stimulus	AK234533.1		Sus scrofa mRNA, clone:OVR010076H11, expressed in ovary	0.763793	1.09403
GO:0050896	response to stimulus	AK234932.1		Sus scrofa mRNA, clone:OVRM10033G12, expressed in ovary	0.763793	1.09403
GO:0050896	response to stimulus	AK236127.1		Sus scrofa mRNA, clone:OVRM10155A01, expressed in ovary	0.763793	1.09403
GO:0050896	response to stimulus	AK236404.1		Sus scrofa mRNA, clone:OVRM10189A09, expressed in ovary	0.763793	1.09403
GO:0050896	response to stimulus	AK237508.1		Sus scrofa mRNA, clone:SPL010054G05, expressed in spleen	0.763793	1.09403
GO:0050896	response to stimulus	AK238982.1		Sus scrofa mRNA, clone:THY010053D09, expressed in thymus	0.763793	1.09403
GO:0050896	response to stimulus	AK239728.1		Sus scrofa mRNA, clone:THY010126C02, expressed in thymus	0.763793	1.09403
GO:0050896	response to stimulus	AY609666.1		Sus scrofa clone Clu_24219.scr.msk.p1.Contig4, mRNA sequence	0.763793	1.09403
GO:0050896	response to stimulus	BX664880		BX664880 Sus Scrofa library (scag) Sus scrofa cDNA clone scag0005.d.07 5prim, mRNA sequence	0.763793	1.09403
GO:0050896	response to stimulus	CN164178		994302 MARC 4PIG Sus scrofa cDNA 5', mRNA sequence	0.763793	1.09403
GO:0050896	response to stimulus	EW316148		rpldo0102_g1.y1 ldo Sus scrofa cDNA 5', mRNA sequence	0.763793	1.09403
GO:0050896	response to stimulus	EW464984		rnmm24c_m17.y1 nmm Sus scrofa cDNA 5', mRNA sequence	0.763793	1.09403
GO:0050896	response to stimulus	NM_001113706.1	SLA-DRA	Sus scrofa MHC class II DR-alpha (SLA-DRA), mRNA	0.763793	1.09403
GO:0034961	cellular biopolymer biosynthetic process	AK236127.1		Sus scrofa mRNA, clone:OVRM10155A01, expressed in ovary	0.765625	1.17974
GO:0034961	cellular biopolymer biosynthetic process	AK238836.1		Sus scrofa mRNA, clone:THY010035H09, expressed in thymus	0.765625	1.17974
GO:0034961	cellular biopolymer biosynthetic process	BX918412		BX918412 Sus Scrofa library (scan) Sus scrofa cDNA clone scan0038.i.09 5prim, mRNA sequence	0.765625	1.17974
GO:0034961	cellular biopolymer biosynthetic process	DN123551		1123855 MARC 4PIG Sus scrofa cDNA 5', mRNA sequence	0.765625	1.17974
GO:0034961	cellular biopolymer biosynthetic process	DY405876		1497400 MARC 3PIG Sus scrofa cDNA 5', mRNA sequence	0.765625	1.17974
GO:0034961	cellular biopolymer biosynthetic process	EV928670		rche13_i19.y1 che Sus scrofa cDNA 5', mRNA sequence	0.765625	1.17974
GO:0034961	cellular biopolymer biosynthetic process	XM_001926121.1	LOC100157971	PREDICTED: Sus scrofa similar to mitochondrial ribosomal protein L52 (LOC100157971), mRNA	0.765625	1.17974
GO:0043284	biopolymer biosynthetic process	AK236127.1		Sus scrofa mRNA, clone:OVRM10155A01, expressed in ovary	0.765625	1.17974
GO:0043284	biopolymer biosynthetic process	AK238836.1		Sus scrofa mRNA, clone:THY010035H09, expressed in thymus	0.765625	1.17974
GO:0043284	biopolymer biosynthetic process	BX918412		BX918412 Sus Scrofa library (scan) Sus scrofa cDNA clone scan0038.i.09 5prim, mRNA sequence	0.765625	1.17974
GO:0043284	biopolymer biosynthetic process	DN123551		1123855 MARC 4PIG Sus scrofa cDNA 5', mRNA sequence	0.765625	1.17974
GO:0043284	biopolymer biosynthetic process	DY405876		1497400 MARC 3PIG Sus scrofa cDNA 5', mRNA sequence	0.765625	1.17974
GO:0043284	biopolymer biosynthetic process	EV928670		rche13_i19.y1 che Sus scrofa cDNA 5', mRNA sequence	0.765625	1.17974
GO:0043284	biopolymer biosynthetic process	XM_001926121.1	LOC100157971	PREDICTED: Sus scrofa similar to mitochondrial ribosomal protein L52 (LOC100157971), mRNA	0.765625	1.17974
GO:0002696	positive regulation of leukocyte activation	CN164178		994302 MARC 4PIG Sus scrofa cDNA 5', mRNA sequence	0.772172	2.07156
GO:0003006	reproductive developmental process	BX672955		BX672955 Sus Scrofa library (scac) Sus scrofa cDNA clone scac0044.o.04 5prim, mRNA sequence	0.772172	2.07156
GO:0043281	regulation of caspase activity	AK239728.1		Sus scrofa mRNA, clone:THY010126C02, expressed in thymus	0.772172	2.07156
GO:0050867	positive regulation of cell activation	CN164178		994302 MARC 4PIG Sus scrofa cDNA 5', mRNA sequence	0.772172	2.07156
GO:0052547	regulation of peptidase activity	AK239728.1		Sus scrofa mRNA, clone:THY010126C02, expressed in thymus	0.772172	2.07156
GO:0052548	regulation of endopeptidase activity	AK239728.1		Sus scrofa mRNA, clone:THY010126C02, expressed in thymus	0.772172	2.07156
GO:0006468	protein amino acid phosphorylation	AK238982.1		Sus scrofa mRNA, clone:THY010053D09, expressed in thymus	0.775326	0.710249
GO:0006468	protein amino acid phosphorylation	DB788903		DB788903 full-length enriched swine cDNA library, adult adrenal gland Sus scrofa cDNA clone ADR010083F11 5', mRNA sequence	0.775326	0.710249
GO:0006468	protein amino acid phosphorylation	XM_001925866.1	LOC100152572	PREDICTED: Sus scrofa similar to MLK-related kinase (LOC100152572), mRNA	0.775326	0.710249
GO:0009892	negative regulation of metabolic process	CK467405		938702 MARC 4PIG Sus scrofa cDNA 5', mRNA sequence	0.775326	0.710249
GO:0009892	negative regulation of metabolic process	EW316148		rpldo0102_g1.y1 ldo Sus scrofa cDNA 5', mRNA sequence	0.775326	0.710249
GO:0009892	negative regulation of metabolic process	EW421594		rnca11b_e13.y1 nca Sus scrofa cDNA 5', mRNA sequence	0.775326	0.710249
GO:0043933	macromolecular complex subunit organization	AK240563.1		Sus scrofa mRNA, clone:UTR010098F11, expressed in uterus	0.791136	1.21262
GO:0043933	macromolecular complex subunit organization	BX918412		BX918412 Sus Scrofa library (scan) Sus scrofa cDNA clone scan0038.i.09 5prim, mRNA sequence	0.791136	1.21262
GO:0043933	macromolecular complex subunit organization	DT324183		SusFleck_BF_0033_0036_5_pCNS_D01 SusFleck Backfat Sus scrofa cDNA clone 0033_0036_D01 5', mRNA sequence	0.791136	1.21262
GO:0043933	macromolecular complex subunit organization	EW055180		rpigcb_10659.y1 cty Sus scrofa cDNA 5', mRNA sequence	0.791136	1.21262
GO:0043933	macromolecular complex subunit organization	NM_001097486.1	ATPIF1	Sus scrofa ATPase inhibitory factor 1 (ATPIF1), nuclear gene encoding mitochondrial protein, mRNA	0.791136	1.21262
GO:0048513	organ development	AF329358.1	LAMB1	Sus scrofa laminin beta-1 chain mRNA, partial cds	0.796272	1.14622
GO:0048513	organ development	AK233000.1		Sus scrofa mRNA, clone:LVRM10065H01, expressed in liver	0.796272	1.14622
GO:0048513	organ development	BX672955		BX672955 Sus Scrofa library (scac) Sus scrofa cDNA clone scac0044.o.04 5prim, mRNA sequence	0.796272	1.14622
GO:0048513	organ development	BX925993		BX925993 Sus Scrofa library (scan) Sus scrofa cDNA clone scan0021.f.19 5prim, mRNA sequence	0.796272	1.14622
GO:0048513	organ development	DN128580		1142660 MARC 4PIG Sus scrofa cDNA 3', mRNA sequence	0.796272	1.14622
GO:0048513	organ development	DT324183		SusFleck_BF_0033_0036_5_pCNS_D01 SusFleck Backfat Sus scrofa cDNA clone 0033_0036_D01 5', mRNA sequence	0.796272	1.14622
GO:0048513	organ development	DV904076		POSM0605028_M02R porcine skeletal muscle cDNA library (PoSM) Sus scrofa cDNA 3', mRNA sequence	0.796272	1.14622
GO:0048513	organ development	NM_001105288.1	COL5A3	Sus scrofa collagen, type V, alpha 3 (COL5A3), mRNA	0.796272	1.14622
GO:0007178	transmembrane receptor protein serine/threonine kinase signaling pathway	DN121268		1121355 MARC 4PIG Sus scrofa cDNA 3', mRNA sequence	0.796895	1.9887
GO:0007398	ectoderm development	NM_001105288.1	COL5A3	Sus scrofa collagen, type V, alpha 3 (COL5A3), mRNA	0.796895	1.9887
GO:0051260	protein homooligomerization	NM_001097486.1	ATPIF1	Sus scrofa ATPase inhibitory factor 1 (ATPIF1), nuclear gene encoding mitochondrial protein, mRNA	0.796895	1.9887
GO:0051272	positive regulation of cell motion	AF329358.1	LAMB1	Sus scrofa laminin beta-1 chain mRNA, partial cds	0.796895	1.9887
GO:0030182	neuron differentiation	AF329358.1	LAMB1	Sus scrofa laminin beta-1 chain mRNA, partial cds	0.796918	1.46228
GO:0030182	neuron differentiation	AK233000.1		Sus scrofa mRNA, clone:LVRM10065H01, expressed in liver	0.796918	1.46228
GO:0008285	negative regulation of cell proliferation	NM_001097486.1	ATPIF1	Sus scrofa ATPase inhibitory factor 1 (ATPIF1), nuclear gene encoding mitochondrial protein, mRNA	0.799146	0.497174
GO:0016070	RNA metabolic process	AK233966.1		Sus scrofa mRNA, clone:MLN010082C02, expressed in mesenteric lymph node	0.799161	1.1328
GO:0016070	RNA metabolic process	AK236127.1		Sus scrofa mRNA, clone:OVRM10155A01, expressed in ovary	0.799161	1.1328
GO:0016070	RNA metabolic process	AK236404.1		Sus scrofa mRNA, clone:OVRM10189A09, expressed in ovary	0.799161	1.1328
GO:0016070	RNA metabolic process	AY609798.1		Sus scrofa clone Clu_3164.scr.msk.p1.Contig1, mRNA sequence	0.799161	1.1328
GO:0016070	RNA metabolic process	AY610143.1		Sus scrofa clone Clu_7951.scr.msk.p1.Contig1, mRNA sequence	0.799161	1.1328
GO:0016070	RNA metabolic process	BI182307		UNL-P-FN-bg-h-08-0-UNL.s1 UNL-P-FN Sus scrofa cDNA clone UNL-P-FN-bg-h-08-0-UNL 3', mRNA sequence	0.799161	1.1328
GO:0016070	RNA metabolic process	CK457656		921976 MARC 4PIG Sus scrofa cDNA 3', mRNA sequence	0.799161	1.1328
GO:0016070	RNA metabolic process	XM_001927898.1	LOC100157624	PREDICTED: Sus scrofa similar to TSR2, 20S rRNA accumulation, homolog (S. cerevisiae) (LOC100157624), mRNA	0.799161	1.1328
GO:0016070	RNA metabolic process	XM_001929236.1	LOC100157075	PREDICTED: Sus scrofa similar to snurportin 1 (LOC100157075), mRNA	0.799161	1.1328
GO:0048468	cell development	AF329358.1	LAMB1	Sus scrofa laminin beta-1 chain mRNA, partial cds	0.804346	1.24294
GO:0048468	cell development	AK233000.1		Sus scrofa mRNA, clone:LVRM10065H01, expressed in liver	0.804346	1.24294
GO:0048468	cell development	BX925993		BX925993 Sus Scrofa library (scan) Sus scrofa cDNA clone scan0021.f.19 5prim, mRNA sequence	0.804346	1.24294
GO:0048468	cell development	DV904076		POSM0605028_M02R porcine skeletal muscle cDNA library (PoSM) Sus scrofa cDNA 3', mRNA sequence	0.804346	1.24294
GO:0010604	positive regulation of macromolecule metabolic process	CN164178		994302 MARC 4PIG Sus scrofa cDNA 5', mRNA sequence	0.805594	0.72404
GO:0010604	positive regulation of macromolecule metabolic process	DN121268		1121355 MARC 4PIG Sus scrofa cDNA 3', mRNA sequence	0.805594	0.72404
GO:0010604	positive regulation of macromolecule metabolic process	EW464984		rnmm24c_m17.y1 nmm Sus scrofa cDNA 5', mRNA sequence	0.805594	0.72404
GO:0007242	intracellular signaling cascade	AK232555.1		Sus scrofa mRNA, clone:LVR010073A12, expressed in liver	0.810771	0.824046
GO:0007242	intracellular signaling cascade	AK238982.1		Sus scrofa mRNA, clone:THY010053D09, expressed in thymus	0.810771	0.824046
GO:0007242	intracellular signaling cascade	AY609666.1		Sus scrofa clone Clu_24219.scr.msk.p1.Contig4, mRNA sequence	0.810771	0.824046
GO:0007242	intracellular signaling cascade	EW089566		recc2817c_e7.y1 ecc Sus scrofa cDNA 5', mRNA sequence	0.810771	0.824046
GO:0007242	intracellular signaling cascade	EW421594		rnca11b_e13.y1 nca Sus scrofa cDNA 5', mRNA sequence	0.810771	0.824046
GO:0007242	intracellular signaling cascade	XM_001925866.1	LOC100152572	PREDICTED: Sus scrofa similar to MLK-related kinase (LOC100152572), mRNA	0.810771	0.824046
GO:0043086	negative regulation of catalytic activity	AK239728.1		Sus scrofa mRNA, clone:THY010126C02, expressed in thymus	0.811045	1.44109
GO:0043086	negative regulation of catalytic activity	NM_001097486.1	ATPIF1	Sus scrofa ATPase inhibitory factor 1 (ATPIF1), nuclear gene encoding mitochondrial protein, mRNA	0.811045	1.44109
GO:0044238	primary metabolic process	AJ950507		AJ950507 KN404_1 Sus scrofa cDNA clone C0007741i12 5', mRNA sequence	0.812945	1.04459
GO:0044238	primary metabolic process	AK230638.1	LOC100157274	Sus scrofa mRNA, clone:AMP010019E02, expressed in alveolar macrophage	0.812945	1.04459
GO:0044238	primary metabolic process	AK232555.1		Sus scrofa mRNA, clone:LVR010073A12, expressed in liver	0.812945	1.04459
GO:0044238	primary metabolic process	AK233966.1		Sus scrofa mRNA, clone:MLN010082C02, expressed in mesenteric lymph node	0.812945	1.04459
GO:0044238	primary metabolic process	AK234932.1		Sus scrofa mRNA, clone:OVRM10033G12, expressed in ovary	0.812945	1.04459
GO:0044238	primary metabolic process	AK235390.1		Sus scrofa mRNA, clone:OVRM10075G05, expressed in ovary	0.812945	1.04459
GO:0044238	primary metabolic process	AK236028.1		Sus scrofa mRNA, clone:OVRM10140A03, expressed in ovary	0.812945	1.04459
GO:0044238	primary metabolic process	AK236127.1		Sus scrofa mRNA, clone:OVRM10155A01, expressed in ovary	0.812945	1.04459
GO:0044238	primary metabolic process	AK236404.1		Sus scrofa mRNA, clone:OVRM10189A09, expressed in ovary	0.812945	1.04459
GO:0044238	primary metabolic process	AK238836.1		Sus scrofa mRNA, clone:THY010035H09, expressed in thymus	0.812945	1.04459
GO:0044238	primary metabolic process	AK238982.1		Sus scrofa mRNA, clone:THY010053D09, expressed in thymus	0.812945	1.04459
GO:0044238	primary metabolic process	AK239600.1		Sus scrofa mRNA, clone:THY010115C09, expressed in thymus	0.812945	1.04459
GO:0044238	primary metabolic process	AK239728.1		Sus scrofa mRNA, clone:THY010126C02, expressed in thymus	0.812945	1.04459
GO:0044238	primary metabolic process	AY214329.1	LOC403161	Sus scrofa nicotinate phosphoribosyltransferase-like protein mRNA, partial cds	0.812945	1.04459
GO:0044238	primary metabolic process	AY609666.1		Sus scrofa clone Clu_24219.scr.msk.p1.Contig4, mRNA sequence	0.812945	1.04459
GO:0044238	primary metabolic process	AY609798.1		Sus scrofa clone Clu_3164.scr.msk.p1.Contig1, mRNA sequence	0.812945	1.04459
GO:0044238	primary metabolic process	AY610143.1		Sus scrofa clone Clu_7951.scr.msk.p1.Contig1, mRNA sequence	0.812945	1.04459
GO:0044238	primary metabolic process	AY610411.1	TPRKB	Sus scrofa clone risp02_p18.y1.abd, mRNA sequence	0.812945	1.04459
GO:0044238	primary metabolic process	BI182307		UNL-P-FN-bg-h-08-0-UNL.s1 UNL-P-FN Sus scrofa cDNA clone UNL-P-FN-bg-h-08-0-UNL 3', mRNA sequence	0.812945	1.04459
GO:0044238	primary metabolic process	BX664880		BX664880 Sus Scrofa library (scag) Sus scrofa cDNA clone scag0005.d.07 5prim, mRNA sequence	0.812945	1.04459
GO:0044238	primary metabolic process	BX915041		BX915041 Sus Scrofa library (scan) Sus scrofa cDNA clone scan0027.c.13 5prim, mRNA sequence	0.812945	1.04459
GO:0044238	primary metabolic process	BX918412		BX918412 Sus Scrofa library (scan) Sus scrofa cDNA clone scan0038.i.09 5prim, mRNA sequence	0.812945	1.04459
GO:0044238	primary metabolic process	CA779561		MPL384_12_P03 MPL Sus scrofa cDNA clone pSPORT1 5', mRNA sequence	0.812945	1.04459
GO:0044238	primary metabolic process	CJ012192		CJ012192 full-length enriched swine cDNA library, adult mesenteric lymph node Sus scrofa cDNA clone MLN01B080058 5', mRNA sequence	0.812945	1.04459
GO:0044238	primary metabolic process	CK453061		908745 MARC 4PIG Sus scrofa cDNA 5', mRNA sequence	0.812945	1.04459
GO:0044238	primary metabolic process	CK457656		921976 MARC 4PIG Sus scrofa cDNA 3', mRNA sequence	0.812945	1.04459
GO:0044238	primary metabolic process	CK462437		933235 MARC 4PIG Sus scrofa cDNA 3', mRNA sequence	0.812945	1.04459
GO:0044238	primary metabolic process	CN164178		994302 MARC 4PIG Sus scrofa cDNA 5', mRNA sequence	0.812945	1.04459
GO:0044238	primary metabolic process	DB788903		DB788903 full-length enriched swine cDNA library, adult adrenal gland Sus scrofa cDNA clone ADR010083F11 5', mRNA sequence	0.812945	1.04459
GO:0044238	primary metabolic process	DN123551		1123855 MARC 4PIG Sus scrofa cDNA 5', mRNA sequence	0.812945	1.04459
GO:0044238	primary metabolic process	DY405876		1497400 MARC 3PIG Sus scrofa cDNA 5', mRNA sequence	0.812945	1.04459
GO:0044238	primary metabolic process	DY406584		1498188 MARC 3PIG Sus scrofa cDNA 5', mRNA sequence	0.812945	1.04459
GO:0044238	primary metabolic process	EV869069		rpbfe0138_n6.y1 bfe Sus scrofa cDNA 5', mRNA sequence	0.812945	1.04459
GO:0044238	primary metabolic process	EV928670		rche13_i19.y1 che Sus scrofa cDNA 5', mRNA sequence	0.812945	1.04459
GO:0044238	primary metabolic process	EW290234		rjej38b_p21.y1 jej Sus scrofa cDNA 5', mRNA sequence	0.812945	1.04459
GO:0044238	primary metabolic process	NM_213897.1	ACADL	Sus scrofa acyl-Coenzyme A dehydrogenase, long chain (ACADL), nuclear gene encoding mitochondrial protein, mRNA	0.812945	1.04459
GO:0044238	primary metabolic process	NM_214039.1	ACADM	Sus scrofa acyl-Coenzyme A dehydrogenase, C-4 to C-12 straight chain (ACADM), nuclear gene encoding mitochondrial protein, mRNA	0.812945	1.04459
GO:0044238	primary metabolic process	NM_214052.1	PLCD4	Sus scrofa phospholipase C, delta 4 (PLCD4), mRNA	0.812945	1.04459
GO:0044238	primary metabolic process	XM_001925866.1	LOC100152572	PREDICTED: Sus scrofa similar to MLK-related kinase (LOC100152572), mRNA	0.812945	1.04459
GO:0044238	primary metabolic process	XM_001926121.1	LOC100157971	PREDICTED: Sus scrofa similar to mitochondrial ribosomal protein L52 (LOC100157971), mRNA	0.812945	1.04459
GO:0044238	primary metabolic process	XM_001927898.1	LOC100157624	PREDICTED: Sus scrofa similar to TSR2, 20S rRNA accumulation, homolog (S. cerevisiae) (LOC100157624), mRNA	0.812945	1.04459
GO:0044238	primary metabolic process	XM_001929236.1	LOC100157075	PREDICTED: Sus scrofa similar to snurportin 1 (LOC100157075), mRNA	0.812945	1.04459
GO:0031324	negative regulation of cellular metabolic process	CK467405		938702 MARC 4PIG Sus scrofa cDNA 5', mRNA sequence	0.820989	0.731139
GO:0031324	negative regulation of cellular metabolic process	EW316148		rpldo0102_g1.y1 ldo Sus scrofa cDNA 5', mRNA sequence	0.820989	0.731139
GO:0031324	negative regulation of cellular metabolic process	EW421594		rnca11b_e13.y1 nca Sus scrofa cDNA 5', mRNA sequence	0.820989	0.731139
GO:0016064	immunoglobulin mediated immune response	CN164178		994302 MARC 4PIG Sus scrofa cDNA 5', mRNA sequence	0.82112	1.91221
GO:0019724	B cell mediated immunity	CN164178		994302 MARC 4PIG Sus scrofa cDNA 5', mRNA sequence	0.82112	1.91221
GO:0050878	regulation of body fluid levels	AK236127.1		Sus scrofa mRNA, clone:OVRM10155A01, expressed in ovary	0.82112	1.91221
GO:0000902	cell morphogenesis	AF329358.1	LAMB1	Sus scrofa laminin beta-1 chain mRNA, partial cds	0.821179	0.507321
GO:0032989	cellular structure morphogenesis	AF329358.1	LAMB1	Sus scrofa laminin beta-1 chain mRNA, partial cds	0.821179	0.507321
GO:0046907	intracellular transport	AK233000.1		Sus scrofa mRNA, clone:LVRM10065H01, expressed in liver	0.829809	0.80973
GO:0046907	intracellular transport	AY609666.1		Sus scrofa clone Clu_24219.scr.msk.p1.Contig4, mRNA sequence	0.829809	0.80973
GO:0046907	intracellular transport	BX666658		BX666658 Sus Scrofa library (scac) Sus scrofa cDNA clone scac0025.d.07 3prim, mRNA sequence	0.829809	0.80973
GO:0046907	intracellular transport	CK454638		915131 MARC 4PIG Sus scrofa cDNA 5', mRNA sequence	0.829809	0.80973
GO:0046907	intracellular transport	CK454645		915140 MARC 4PIG Sus scrofa cDNA 5', mRNA sequence	0.829809	0.80973
GO:0030001	metal ion transport	AK232136.1		Sus scrofa mRNA, clone:LNG010086D03, expressed in lung	0.84366	0.51789
GO:0006575	amino acid derivative metabolic process	EW290234		rjej38b_p21.y1 jej Sus scrofa cDNA 5', mRNA sequence	0.844859	1.84139
GO:0042770	DNA damage response, signal transduction	AK232555.1		Sus scrofa mRNA, clone:LVR010073A12, expressed in liver	0.844859	1.84139
GO:0050863	regulation of T cell activation	CN164178		994302 MARC 4PIG Sus scrofa cDNA 5', mRNA sequence	0.844859	1.84139
GO:0034984	cellular response to DNA damage stimulus	AJ950507		AJ950507 KN404_1 Sus scrofa cDNA clone C0007741i12 5', mRNA sequence	0.849513	1.20527
GO:0034984	cellular response to DNA damage stimulus	AK232555.1		Sus scrofa mRNA, clone:LVR010073A12, expressed in liver	0.849513	1.20527
GO:0034984	cellular response to DNA damage stimulus	AK234932.1		Sus scrofa mRNA, clone:OVRM10033G12, expressed in ovary	0.849513	1.20527
GO:0034984	cellular response to DNA damage stimulus	BX664880		BX664880 Sus Scrofa library (scag) Sus scrofa cDNA clone scag0005.d.07 5prim, mRNA sequence	0.849513	1.20527
GO:0010605	negative regulation of macromolecule metabolic process	CK467405		938702 MARC 4PIG Sus scrofa cDNA 5', mRNA sequence	0.852287	0.745762
GO:0010605	negative regulation of macromolecule metabolic process	EW316148		rpldo0102_g1.y1 ldo Sus scrofa cDNA 5', mRNA sequence	0.852287	0.745762
GO:0010605	negative regulation of macromolecule metabolic process	EW421594		rnca11b_e13.y1 nca Sus scrofa cDNA 5', mRNA sequence	0.852287	0.745762
GO:0006807	nitrogen compound metabolic process	EW290234		rjej38b_p21.y1 jej Sus scrofa cDNA 5', mRNA sequence	0.855068	0.523341
GO:0043066	negative regulation of apoptosis	AK235751.1		Sus scrofa mRNA, clone:OVRM10111E07, expressed in ovary	0.866587	0.528909
GO:0043069	negative regulation of programmed cell death	AK235751.1		Sus scrofa mRNA, clone:OVRM10111E07, expressed in ovary	0.866587	0.528909
GO:0046483	heterocycle metabolic process	EW290234		rjej38b_p21.y1 jej Sus scrofa cDNA 5', mRNA sequence	0.868121	1.77562
GO:0051101	regulation of DNA binding	EW316148		rpldo0102_g1.y1 ldo Sus scrofa cDNA 5', mRNA sequence	0.868121	1.77562
GO:0032787	monocarboxylic acid metabolic process	AK239600.1		Sus scrofa mRNA, clone:THY010115C09, expressed in thymus	0.870441	1.24294
GO:0032787	monocarboxylic acid metabolic process	NM_213897.1	ACADL	Sus scrofa acyl-Coenzyme A dehydrogenase, long chain (ACADL), nuclear gene encoding mitochondrial protein, mRNA	0.870441	1.24294
GO:0032787	monocarboxylic acid metabolic process	NM_214039.1	ACADM	Sus scrofa acyl-Coenzyme A dehydrogenase, C-4 to C-12 straight chain (ACADM), nuclear gene encoding mitochondrial protein, mRNA	0.870441	1.24294
GO:0034645	cellular macromolecule biosynthetic process	AK236028.1		Sus scrofa mRNA, clone:OVRM10140A03, expressed in ovary	0.87552	1.10483
GO:0034645	cellular macromolecule biosynthetic process	AK236127.1		Sus scrofa mRNA, clone:OVRM10155A01, expressed in ovary	0.87552	1.10483
GO:0034645	cellular macromolecule biosynthetic process	AK238836.1		Sus scrofa mRNA, clone:THY010035H09, expressed in thymus	0.87552	1.10483
GO:0034645	cellular macromolecule biosynthetic process	BX918412		BX918412 Sus Scrofa library (scan) Sus scrofa cDNA clone scan0038.i.09 5prim, mRNA sequence	0.87552	1.10483
GO:0034645	cellular macromolecule biosynthetic process	DN123551		1123855 MARC 4PIG Sus scrofa cDNA 5', mRNA sequence	0.87552	1.10483
GO:0034645	cellular macromolecule biosynthetic process	DY405876		1497400 MARC 3PIG Sus scrofa cDNA 5', mRNA sequence	0.87552	1.10483
GO:0034645	cellular macromolecule biosynthetic process	EV928670		rche13_i19.y1 che Sus scrofa cDNA 5', mRNA sequence	0.87552	1.10483
GO:0034645	cellular macromolecule biosynthetic process	XM_001926121.1	LOC100157971	PREDICTED: Sus scrofa similar to mitochondrial ribosomal protein L52 (LOC100157971), mRNA	0.87552	1.10483
GO:0006260	DNA replication	BX918412		BX918412 Sus Scrofa library (scan) Sus scrofa cDNA clone scan0038.i.09 5prim, mRNA sequence	0.878218	0.534596
GO:0034641	cellular nitrogen compound metabolic process	EW290234		rjej38b_p21.y1 jej Sus scrofa cDNA 5', mRNA sequence	0.878218	0.534596
GO:0045935	positive regulation of nucleobase, nucleoside, nucleotide and nucleic acid metabolic process	DN121268		1121355 MARC 4PIG Sus scrofa cDNA 3', mRNA sequence	0.878683	0.685758
GO:0045935	positive regulation of nucleobase, nucleoside, nucleotide and nucleic acid metabolic process	EW464984		rnmm24c_m17.y1 nmm Sus scrofa cDNA 5', mRNA sequence	0.878683	0.685758
GO:0044262	cellular carbohydrate metabolic process	CK453061		908745 MARC 4PIG Sus scrofa cDNA 5', mRNA sequence	0.880432	1.34371
GO:0044262	cellular carbohydrate metabolic process	EV869069		rpbfe0138_n6.y1 bfe Sus scrofa cDNA 5', mRNA sequence	0.880432	1.34371
GO:0009059	macromolecule biosynthetic process	AK236028.1		Sus scrofa mRNA, clone:OVRM10140A03, expressed in ovary	0.887672	1.09873
GO:0009059	macromolecule biosynthetic process	AK236127.1		Sus scrofa mRNA, clone:OVRM10155A01, expressed in ovary	0.887672	1.09873
GO:0009059	macromolecule biosynthetic process	AK238836.1		Sus scrofa mRNA, clone:THY010035H09, expressed in thymus	0.887672	1.09873
GO:0009059	macromolecule biosynthetic process	BX918412		BX918412 Sus Scrofa library (scan) Sus scrofa cDNA clone scan0038.i.09 5prim, mRNA sequence	0.887672	1.09873
GO:0009059	macromolecule biosynthetic process	DN123551		1123855 MARC 4PIG Sus scrofa cDNA 5', mRNA sequence	0.887672	1.09873
GO:0009059	macromolecule biosynthetic process	DY405876		1497400 MARC 3PIG Sus scrofa cDNA 5', mRNA sequence	0.887672	1.09873
GO:0009059	macromolecule biosynthetic process	EV928670		rche13_i19.y1 che Sus scrofa cDNA 5', mRNA sequence	0.887672	1.09873
GO:0009059	macromolecule biosynthetic process	XM_001926121.1	LOC100157971	PREDICTED: Sus scrofa similar to mitochondrial ribosomal protein L52 (LOC100157971), mRNA	0.887672	1.09873
GO:0002449	lymphocyte mediated immunity	CN164178		994302 MARC 4PIG Sus scrofa cDNA 5', mRNA sequence	0.890916	1.71439
GO:0006766	vitamin metabolic process	AY214329.1	LOC403161	Sus scrofa nicotinate phosphoribosyltransferase-like protein mRNA, partial cds	0.890916	1.71439
GO:0030705	cytoskeleton-dependent intracellular transport	CK454645		915140 MARC 4PIG Sus scrofa cDNA 5', mRNA sequence	0.890916	1.71439
GO:0042108	positive regulation of cytokine biosynthetic process	CN164178		994302 MARC 4PIG Sus scrofa cDNA 5', mRNA sequence	0.890916	1.71439
GO:0051249	regulation of lymphocyte activation	CN164178		994302 MARC 4PIG Sus scrofa cDNA 5', mRNA sequence	0.890916	1.71439
GO:0051253	negative regulation of RNA metabolic process	EW421594		rnca11b_e13.y1 nca Sus scrofa cDNA 5', mRNA sequence	0.901813	0.546345
GO:0016044	membrane organization	AK234277.1		Sus scrofa mRNA, clone:OVR010036G03, expressed in ovary	0.902118	1.21262
GO:0016044	membrane organization	BX925993		BX925993 Sus Scrofa library (scan) Sus scrofa cDNA clone scan0021.f.19 5prim, mRNA sequence	0.902118	1.21262
GO:0016044	membrane organization	CK454638		915131 MARC 4PIG Sus scrofa cDNA 5', mRNA sequence	0.902118	1.21262
GO:0044267	cellular protein metabolic process	AK235390.1		Sus scrofa mRNA, clone:OVRM10075G05, expressed in ovary	0.902904	1.04726
GO:0044267	cellular protein metabolic process	AK236028.1		Sus scrofa mRNA, clone:OVRM10140A03, expressed in ovary	0.902904	1.04726
GO:0044267	cellular protein metabolic process	AK236127.1		Sus scrofa mRNA, clone:OVRM10155A01, expressed in ovary	0.902904	1.04726
GO:0044267	cellular protein metabolic process	AK238836.1		Sus scrofa mRNA, clone:THY010035H09, expressed in thymus	0.902904	1.04726
GO:0044267	cellular protein metabolic process	AK238982.1		Sus scrofa mRNA, clone:THY010053D09, expressed in thymus	0.902904	1.04726
GO:0044267	cellular protein metabolic process	AK239728.1		Sus scrofa mRNA, clone:THY010126C02, expressed in thymus	0.902904	1.04726
GO:0044267	cellular protein metabolic process	AY609666.1		Sus scrofa clone Clu_24219.scr.msk.p1.Contig4, mRNA sequence	0.902904	1.04726
GO:0044267	cellular protein metabolic process	BX664880		BX664880 Sus Scrofa library (scag) Sus scrofa cDNA clone scag0005.d.07 5prim, mRNA sequence	0.902904	1.04726
GO:0044267	cellular protein metabolic process	BX915041		BX915041 Sus Scrofa library (scan) Sus scrofa cDNA clone scan0027.c.13 5prim, mRNA sequence	0.902904	1.04726
GO:0044267	cellular protein metabolic process	CJ012192		CJ012192 full-length enriched swine cDNA library, adult mesenteric lymph node Sus scrofa cDNA clone MLN01B080058 5', mRNA sequence	0.902904	1.04726
GO:0044267	cellular protein metabolic process	CK462437		933235 MARC 4PIG Sus scrofa cDNA 3', mRNA sequence	0.902904	1.04726
GO:0044267	cellular protein metabolic process	DB788903		DB788903 full-length enriched swine cDNA library, adult adrenal gland Sus scrofa cDNA clone ADR010083F11 5', mRNA sequence	0.902904	1.04726
GO:0044267	cellular protein metabolic process	DN123551		1123855 MARC 4PIG Sus scrofa cDNA 5', mRNA sequence	0.902904	1.04726
GO:0044267	cellular protein metabolic process	DY405876		1497400 MARC 3PIG Sus scrofa cDNA 5', mRNA sequence	0.902904	1.04726
GO:0044267	cellular protein metabolic process	DY406584		1498188 MARC 3PIG Sus scrofa cDNA 5', mRNA sequence	0.902904	1.04726
GO:0044267	cellular protein metabolic process	EV928670		rche13_i19.y1 che Sus scrofa cDNA 5', mRNA sequence	0.902904	1.04726
GO:0044267	cellular protein metabolic process	EW290234		rjej38b_p21.y1 jej Sus scrofa cDNA 5', mRNA sequence	0.902904	1.04726
GO:0044267	cellular protein metabolic process	XM_001925866.1	LOC100152572	PREDICTED: Sus scrofa similar to MLK-related kinase (LOC100152572), mRNA	0.902904	1.04726
GO:0044267	cellular protein metabolic process	XM_001926121.1	LOC100157971	PREDICTED: Sus scrofa similar to mitochondrial ribosomal protein L52 (LOC100157971), mRNA	0.902904	1.04726
GO:0006897	endocytosis	AK234277.1		Sus scrofa mRNA, clone:OVR010036G03, expressed in ovary	0.907562	1.30835
GO:0006897	endocytosis	CK454638		915131 MARC 4PIG Sus scrofa cDNA 5', mRNA sequence	0.907562	1.30835
GO:0010324	membrane invagination	AK234277.1		Sus scrofa mRNA, clone:OVR010036G03, expressed in ovary	0.907562	1.30835
GO:0010324	membrane invagination	CK454638		915131 MARC 4PIG Sus scrofa cDNA 5', mRNA sequence	0.907562	1.30835
GO:0002443	leukocyte mediated immunity	CN164178		994302 MARC 4PIG Sus scrofa cDNA 5', mRNA sequence	0.913252	1.65725
GO:0006865	amino acid transport	AK234908	LOC595127	Sus scrofa mRNA, clone:OVRM10028H08, expressed in ovary	0.913252	1.65725
GO:0007005	mitochondrion organization	AK234932.1		Sus scrofa mRNA, clone:OVRM10033G12, expressed in ovary	0.913252	1.65725
GO:0042113	B cell activation	CN164178		994302 MARC 4PIG Sus scrofa cDNA 5', mRNA sequence	0.913252	1.65725
GO:0045892	negative regulation of transcription, DNA-dependent	EW421594		rnca11b_e13.y1 nca Sus scrofa cDNA 5', mRNA sequence	0.925848	0.558623
GO:0007126	meiosis	AJ950507		AJ950507 KN404_1 Sus scrofa cDNA clone C0007741i12 5', mRNA sequence	0.93514	1.60379
GO:0015837	amine transport	AK234908	LOC595127	Sus scrofa mRNA, clone:OVRM10028H08, expressed in ovary	0.93514	1.60379
GO:0051321	meiotic cell cycle	AJ950507		AJ950507 KN404_1 Sus scrofa cDNA clone C0007741i12 5', mRNA sequence	0.93514	1.60379
GO:0051327	M phase of meiotic cell cycle	AJ950507		AJ950507 KN404_1 Sus scrofa cDNA clone C0007741i12 5', mRNA sequence	0.93514	1.60379
GO:0006397	mRNA processing	AK236404.1		Sus scrofa mRNA, clone:OVRM10189A09, expressed in ovary	0.938425	1.1364
GO:0006397	mRNA processing	BI182307		UNL-P-FN-bg-h-08-0-UNL.s1 UNL-P-FN Sus scrofa cDNA clone UNL-P-FN-bg-h-08-0-UNL 3', mRNA sequence	0.938425	1.1364
GO:0006397	mRNA processing	CK457656		921976 MARC 4PIG Sus scrofa cDNA 3', mRNA sequence	0.938425	1.1364
GO:0006397	mRNA processing	XM_001929236.1	LOC100157075	PREDICTED: Sus scrofa similar to snurportin 1 (LOC100157075), mRNA	0.938425	1.1364
GO:0032501	multicellular organismal process	AF329358.1	LAMB1	Sus scrofa laminin beta-1 chain mRNA, partial cds	0.941669	1.03578
GO:0032501	multicellular organismal process	AK233000.1		Sus scrofa mRNA, clone:LVRM10065H01, expressed in liver	0.941669	1.03578
GO:0032501	multicellular organismal process	AK236127.1		Sus scrofa mRNA, clone:OVRM10155A01, expressed in ovary	0.941669	1.03578
GO:0032501	multicellular organismal process	AK239436.1		Sus scrofa mRNA, clone:THY010103G12, expressed in thymus	0.941669	1.03578
GO:0032501	multicellular organismal process	AK240563.1		Sus scrofa mRNA, clone:UTR010098F11, expressed in uterus	0.941669	1.03578
GO:0032501	multicellular organismal process	AY610166.1		Sus scrofa clone Clu_8309.scr.msk.p1.Contig3, mRNA sequence	0.941669	1.03578
GO:0032501	multicellular organismal process	BX672955		BX672955 Sus Scrofa library (scac) Sus scrofa cDNA clone scac0044.o.04 5prim, mRNA sequence	0.941669	1.03578
GO:0032501	multicellular organismal process	BX923538		BX923538 Sus Scrofa library (scan) Sus scrofa cDNA clone scan0014.h.08 5prim, mRNA sequence	0.941669	1.03578
GO:0032501	multicellular organismal process	BX925993		BX925993 Sus Scrofa library (scan) Sus scrofa cDNA clone scan0021.f.19 5prim, mRNA sequence	0.941669	1.03578
GO:0032501	multicellular organismal process	CK454645		915140 MARC 4PIG Sus scrofa cDNA 5', mRNA sequence	0.941669	1.03578
GO:0032501	multicellular organismal process	CN163858		993962 MARC 4PIG Sus scrofa cDNA 5', mRNA sequence	0.941669	1.03578
GO:0032501	multicellular organismal process	CN164178		994302 MARC 4PIG Sus scrofa cDNA 5', mRNA sequence	0.941669	1.03578
GO:0032501	multicellular organismal process	DN118117		1117841 MARC 4PIG Sus scrofa cDNA 5', mRNA sequence	0.941669	1.03578
GO:0032501	multicellular organismal process	DN128580		1142660 MARC 4PIG Sus scrofa cDNA 3', mRNA sequence	0.941669	1.03578
GO:0032501	multicellular organismal process	DT324183		SusFleck_BF_0033_0036_5_pCNS_D01 SusFleck Backfat Sus scrofa cDNA clone 0033_0036_D01 5', mRNA sequence	0.941669	1.03578
GO:0032501	multicellular organismal process	DV904076		POSM0605028_M02R porcine skeletal muscle cDNA library (PoSM) Sus scrofa cDNA 3', mRNA sequence	0.941669	1.03578
GO:0032501	multicellular organismal process	EW055180		rpigcb_10659.y1 cty Sus scrofa cDNA 5', mRNA sequence	0.941669	1.03578
GO:0032501	multicellular organismal process	NM_001105288.1	COL5A3	Sus scrofa collagen, type V, alpha 3 (COL5A3), mRNA	0.941669	1.03578
GO:0032501	multicellular organismal process	NM_213855.1	MYH7	Sus scrofa myosin, heavy chain 7, cardiac muscle, beta (MYH7), mRNA	0.941669	1.03578
GO:0007243	protein kinase cascade	AK238982.1		Sus scrofa mRNA, clone:THY010053D09, expressed in thymus	0.945628	0.720543
GO:0007243	protein kinase cascade	XM_001925866.1	LOC100152572	PREDICTED: Sus scrofa similar to MLK-related kinase (LOC100152572), mRNA	0.945628	0.720543
GO:0009308	cellular amine metabolic process	EW290234		rjej38b_p21.y1 jej Sus scrofa cDNA 5', mRNA sequence	0.950321	0.571465
GO:0010628	positive regulation of gene expression	DN121268		1121355 MARC 4PIG Sus scrofa cDNA 3', mRNA sequence	0.95542	0.725802
GO:0010628	positive regulation of gene expression	EW464984		rnmm24c_m17.y1 nmm Sus scrofa cDNA 5', mRNA sequence	0.95542	0.725802
GO:0045941	positive regulation of transcription	DN121268		1121355 MARC 4PIG Sus scrofa cDNA 3', mRNA sequence	0.95542	0.725802
GO:0045941	positive regulation of transcription	EW464984		rnmm24c_m17.y1 nmm Sus scrofa cDNA 5', mRNA sequence	0.95542	0.725802
GO:0006974	response to DNA damage stimulus	AJ950507		AJ950507 KN404_1 Sus scrofa cDNA clone C0007741i12 5', mRNA sequence	0.955918	1.12356
GO:0006974	response to DNA damage stimulus	AK232555.1		Sus scrofa mRNA, clone:LVR010073A12, expressed in liver	0.955918	1.12356
GO:0006974	response to DNA damage stimulus	AK234932.1		Sus scrofa mRNA, clone:OVRM10033G12, expressed in ovary	0.955918	1.12356
GO:0006974	response to DNA damage stimulus	BX664880		BX664880 Sus Scrofa library (scag) Sus scrofa cDNA clone scag0005.d.07 5prim, mRNA sequence	0.955918	1.12356
GO:0006508	proteolysis	AK235390.1		Sus scrofa mRNA, clone:OVRM10075G05, expressed in ovary	0.956013	0.882558
GO:0006508	proteolysis	AY609666.1		Sus scrofa clone Clu_24219.scr.msk.p1.Contig4, mRNA sequence	0.956013	0.882558
GO:0006508	proteolysis	BX664880		BX664880 Sus Scrofa library (scag) Sus scrofa cDNA clone scag0005.d.07 5prim, mRNA sequence	0.956013	0.882558
GO:0006508	proteolysis	BX915041		BX915041 Sus Scrofa library (scan) Sus scrofa cDNA clone scan0027.c.13 5prim, mRNA sequence	0.956013	0.882558
GO:0006508	proteolysis	CJ012192		CJ012192 full-length enriched swine cDNA library, adult mesenteric lymph node Sus scrofa cDNA clone MLN01B080058 5', mRNA sequence	0.956013	0.882558
GO:0006508	proteolysis	DY406584		1498188 MARC 3PIG Sus scrofa cDNA 5', mRNA sequence	0.956013	0.882558
GO:0002460	adaptive immune response based on somatic recombination of immune receptors built from immunoglobulin superfamily domains	CN164178		994302 MARC 4PIG Sus scrofa cDNA 5', mRNA sequence	0.956588	1.55367
GO:0002694	regulation of leukocyte activation	CN164178		994302 MARC 4PIG Sus scrofa cDNA 5', mRNA sequence	0.956588	1.55367
GO:0006725	cellular aromatic compound metabolic process	AK236389	EPHX1	Sus scrofa mRNA, clone:OVRM10187H12, expressed in ovary	0.956588	1.55367
GO:0051028	mRNA transport	AK236617.1		Sus scrofa mRNA, clone:OVRM10208F03, expressed in ovary	0.956588	1.55367
GO:0002250	adaptive immune response	CN164178		994302 MARC 4PIG Sus scrofa cDNA 5', mRNA sequence	0.977605	1.50659
GO:0003013	circulatory system process	DV904076		POSM0605028_M02R porcine skeletal muscle cDNA library (PoSM) Sus scrofa cDNA 3', mRNA sequence	0.977605	1.50659
GO:0006486	protein amino acid glycosylation	AK236028.1		Sus scrofa mRNA, clone:OVRM10140A03, expressed in ovary	0.977605	1.50659
GO:0008015	blood circulation	DV904076		POSM0605028_M02R porcine skeletal muscle cDNA library (PoSM) Sus scrofa cDNA 3', mRNA sequence	0.977605	1.50659
GO:0043413	biopolymer glycosylation	AK236028.1		Sus scrofa mRNA, clone:OVRM10140A03, expressed in ovary	0.977605	1.50659
GO:0050865	regulation of cell activation	CN164178		994302 MARC 4PIG Sus scrofa cDNA 5', mRNA sequence	0.977605	1.50659
GO:0051188	cofactor biosynthetic process	AY214329.1	LOC403161	Sus scrofa nicotinate phosphoribosyltransferase-like protein mRNA, partial cds	0.977605	1.50659
GO:0070085	glycosylation	AK236028.1		Sus scrofa mRNA, clone:OVRM10140A03, expressed in ovary	0.977605	1.50659
GO:0002682	regulation of immune system process	CK454638		915131 MARC 4PIG Sus scrofa cDNA 5', mRNA sequence	0.986623	1.21262
GO:0002682	regulation of immune system process	CN164178		994302 MARC 4PIG Sus scrofa cDNA 5', mRNA sequence	0.986623	1.21262
GO:0030036	actin cytoskeleton organization	DV904076		POSM0605028_M02R porcine skeletal muscle cDNA library (PoSM) Sus scrofa cDNA 3', mRNA sequence	0.987838	0.591874
GO:0006403	RNA localization	AK236617.1		Sus scrofa mRNA, clone:OVRM10208F03, expressed in ovary	0.998199	1.46228
GO:0007010	cytoskeleton organization	XM_001925866.1	LOC100152572	PREDICTED: Sus scrofa similar to MLK-related kinase (LOC100152572), mRNA	0.998199	1.46228
GO:0050657	nucleic acid transport	AK236617.1		Sus scrofa mRNA, clone:OVRM10208F03, expressed in ovary	0.998199	1.46228
GO:0050658	RNA transport	AK236617.1		Sus scrofa mRNA, clone:OVRM10208F03, expressed in ovary	0.998199	1.46228
GO:0051098	regulation of binding	EW316148		rpldo0102_g1.y1 ldo Sus scrofa cDNA 5', mRNA sequence	0.998199	1.46228
GO:0051236	establishment of RNA localization	AK236617.1		Sus scrofa mRNA, clone:OVRM10208F03, expressed in ovary	0.998199	1.46228
GO:0000041	transition metal ion transport	AK232136.1		Sus scrofa mRNA, clone:LNG010086D03, expressed in lung	1	1.30835
GO:0001775	cell activation	CN164178		994302 MARC 4PIG Sus scrofa cDNA 5', mRNA sequence	1	0.710249
GO:0001817	regulation of cytokine production	CN164178		994302 MARC 4PIG Sus scrofa cDNA 5', mRNA sequence	1	1.15622
GO:0002252	immune effector process	CN164178		994302 MARC 4PIG Sus scrofa cDNA 5', mRNA sequence	1	0.872236
GO:0002520	immune system development	CN164178		994302 MARC 4PIG Sus scrofa cDNA 5', mRNA sequence	1	0.801894
GO:0002684	positive regulation of immune system process	CN164178		994302 MARC 4PIG Sus scrofa cDNA 5', mRNA sequence	1	0.857197
GO:0003002	regionalization	BX923538		BX923538 Sus Scrofa library (scan) Sus scrofa cDNA clone scan0014.h.08 5prim, mRNA sequence	1	1.15622
GO:0005975	carbohydrate metabolic process	AK236028.1		Sus scrofa mRNA, clone:OVRM10140A03, expressed in ovary	1	1.07304
GO:0005975	carbohydrate metabolic process	CK453061		908745 MARC 4PIG Sus scrofa cDNA 5', mRNA sequence	1	1.07304
GO:0005975	carbohydrate metabolic process	EV869069		rpbfe0138_n6.y1 bfe Sus scrofa cDNA 5', mRNA sequence	1	1.07304
GO:0006082	organic acid metabolic process	AK239600.1		Sus scrofa mRNA, clone:THY010115C09, expressed in thymus	1	0.837934
GO:0006082	organic acid metabolic process	NM_213897.1	ACADL	Sus scrofa acyl-Coenzyme A dehydrogenase, long chain (ACADL), nuclear gene encoding mitochondrial protein, mRNA	1	0.837934
GO:0006082	organic acid metabolic process	NM_214039.1	ACADM	Sus scrofa acyl-Coenzyme A dehydrogenase, C-4 to C-12 straight chain (ACADM), nuclear gene encoding mitochondrial protein, mRNA	1	0.837934
GO:0006281	DNA repair	AJ950507		AJ950507 KN404_1 Sus scrofa cDNA clone C0007741i12 5', mRNA sequence	1	1.01464
GO:0006281	DNA repair	AK234932.1		Sus scrofa mRNA, clone:OVRM10033G12, expressed in ovary	1	1.01464
GO:0006281	DNA repair	BX664880		BX664880 Sus Scrofa library (scag) Sus scrofa cDNA clone scag0005.d.07 5prim, mRNA sequence	1	1.01464
GO:0006323	DNA packaging	BX918412		BX918412 Sus Scrofa library (scan) Sus scrofa cDNA clone scan0038.i.09 5prim, mRNA sequence	1	1.34371
GO:0006417	regulation of translation	AK234633.1		Sus scrofa mRNA, clone:OVR010100E10, expressed in ovary	1	1.01464
GO:0006457	protein folding	AK239728.1		Sus scrofa mRNA, clone:THY010126C02, expressed in thymus	1	1.27481
GO:0006519	cellular amino acid and derivative metabolic process	EW290234		rjej38b_p21.y1 jej Sus scrofa cDNA 5', mRNA sequence	1	0.645681
GO:0006732	coenzyme metabolic process	AY214329.1	LOC403161	Sus scrofa nicotinate phosphoribosyltransferase-like protein mRNA, partial cds	1	1.12994
GO:0006753	nucleoside phosphate metabolic process	AY214329.1	LOC403161	Sus scrofa nicotinate phosphoribosyltransferase-like protein mRNA, partial cds	1	0.681061
GO:0006886	intracellular protein transport	AK233000.1		Sus scrofa mRNA, clone:LVRM10065H01, expressed in liver	1	0.852299
GO:0006886	intracellular protein transport	AY609666.1		Sus scrofa clone Clu_24219.scr.msk.p1.Contig4, mRNA sequence	1	0.852299
GO:0006886	intracellular protein transport	CK454638		915131 MARC 4PIG Sus scrofa cDNA 5', mRNA sequence	1	0.852299
GO:0006916	anti-apoptosis	AK235751.1		Sus scrofa mRNA, clone:OVRM10111E07, expressed in ovary	1	0.872236
GO:0006996	organelle organization	AK232555.1		Sus scrofa mRNA, clone:LVR010073A12, expressed in liver	1	1.02775
GO:0006996	organelle organization	AK233966.1		Sus scrofa mRNA, clone:MLN010082C02, expressed in mesenteric lymph node	1	1.02775
GO:0006996	organelle organization	AK234932.1		Sus scrofa mRNA, clone:OVRM10033G12, expressed in ovary	1	1.02775
GO:0006996	organelle organization	AY610143.1		Sus scrofa clone Clu_7951.scr.msk.p1.Contig1, mRNA sequence	1	1.02775
GO:0006996	organelle organization	BX918412		BX918412 Sus Scrofa library (scan) Sus scrofa cDNA clone scan0038.i.09 5prim, mRNA sequence	1	1.02775
GO:0006996	organelle organization	EW421594		rnca11b_e13.y1 nca Sus scrofa cDNA 5', mRNA sequence	1	1.02775
GO:0006996	organelle organization	XM_001925866.1	LOC100152572	PREDICTED: Sus scrofa similar to MLK-related kinase (LOC100152572), mRNA	1	1.02775
GO:0006996	organelle organization	XM_001927898.1	LOC100157624	PREDICTED: Sus scrofa similar to TSR2, 20S rRNA accumulation, homolog (S. cerevisiae) (LOC100157624), mRNA	1	1.02775
GO:0007050	cell cycle arrest	BX915041		BX915041 Sus Scrofa library (scan) Sus scrofa cDNA clone scan0027.c.13 5prim, mRNA sequence	1	1.34371
GO:0007155	cell adhesion	AB237777.1	COL6A1	Sus scrofa COL6A1 mRNA fortype VI collagen alpha-1 chain, partial cds, C-terminal domain	1	1.03578
GO:0007155	cell adhesion	AF329358.1	LAMB1	Sus scrofa laminin beta-1 chain mRNA, partial cds	1	1.03578
GO:0007155	cell adhesion	BG385044		306626 MARC 1PIG Sus scrofa cDNA 5', mRNA sequence	1	1.03578
GO:0007155	cell adhesion	DN121268		1121355 MARC 4PIG Sus scrofa cDNA 3', mRNA sequence	1	1.03578
GO:0007155	cell adhesion	DT324183		SusFleck_BF_0033_0036_5_pCNS_D01 SusFleck Backfat Sus scrofa cDNA clone 0033_0036_D01 5', mRNA sequence	1	1.03578
GO:0007167	enzyme linked receptor protein signaling pathway	DN121268		1121355 MARC 4PIG Sus scrofa cDNA 3', mRNA sequence	1	1.05782
GO:0007167	enzyme linked receptor protein signaling pathway	EW144888		rese17c_m9.y1 ese Sus scrofa cDNA 5', mRNA sequence	1	1.05782
GO:0007169	transmembrane receptor protein tyrosine kinase signaling pathway	EW144888		rese17c_m9.y1 ese Sus scrofa cDNA 5', mRNA sequence	1	0.753295
GO:0007264	small GTPase mediated signal transduction	EW089566		recc2817c_e7.y1 ecc Sus scrofa cDNA 5', mRNA sequence	1	0.801894
GO:0007389	pattern specification process	BX923538		BX923538 Sus Scrofa library (scan) Sus scrofa cDNA clone scan0014.h.08 5prim, mRNA sequence	1	0.828624
GO:0007417	central nervous system development	AK233000.1		Sus scrofa mRNA, clone:LVRM10065H01, expressed in liver	1	0.645681
GO:0007420	brain development	AK233000.1		Sus scrofa mRNA, clone:LVRM10065H01, expressed in liver	1	1.05782
GO:0007507	heart development	DV904076		POSM0605028_M02R porcine skeletal muscle cDNA library (PoSM) Sus scrofa cDNA 3', mRNA sequence	1	1.08081
GO:0008283	cell proliferation	AK230581.1	----	Sus scrofa mRNA, clone:AMP010011G04, expressed in alveolar macrophage	1	0.764884
GO:0008283	cell proliferation	AK236676.1		Sus scrofa mRNA, clone:OVRM10214D04, expressed in ovary	1	0.764884
GO:0009100	glycoprotein metabolic process	AK236028.1		Sus scrofa mRNA, clone:OVRM10140A03, expressed in ovary	1	1.05782
GO:0009101	glycoprotein biosynthetic process	AK236028.1		Sus scrofa mRNA, clone:OVRM10140A03, expressed in ovary	1	1.4205
GO:0009117	nucleotide metabolic process	AY214329.1	LOC403161	Sus scrofa nicotinate phosphoribosyltransferase-like protein mRNA, partial cds	1	0.681061
GO:0009165	nucleotide biosynthetic process	AY214329.1	LOC403161	Sus scrofa nicotinate phosphoribosyltransferase-like protein mRNA, partial cds	1	1.4205
GO:0009887	organ morphogenesis	AF329358.1	LAMB1	Sus scrofa laminin beta-1 chain mRNA, partial cds	1	0.782952
GO:0009887	organ morphogenesis	DV904076		POSM0605028_M02R porcine skeletal muscle cDNA library (PoSM) Sus scrofa cDNA 3', mRNA sequence	1	0.782952
GO:0009890	negative regulation of biosynthetic process	CK467405		938702 MARC 4PIG Sus scrofa cDNA 5', mRNA sequence	1	0.920693
GO:0009890	negative regulation of biosynthetic process	EW316148		rpldo0102_g1.y1 ldo Sus scrofa cDNA 5', mRNA sequence	1	0.920693
GO:0009890	negative regulation of biosynthetic process	EW421594		rnca11b_e13.y1 nca Sus scrofa cDNA 5', mRNA sequence	1	0.920693
GO:0009891	positive regulation of biosynthetic process	CN164178		994302 MARC 4PIG Sus scrofa cDNA 5', mRNA sequence	1	0.852299
GO:0009891	positive regulation of biosynthetic process	DN121268		1121355 MARC 4PIG Sus scrofa cDNA 3', mRNA sequence	1	0.852299
GO:0009891	positive regulation of biosynthetic process	EW464984		rnmm24c_m17.y1 nmm Sus scrofa cDNA 5', mRNA sequence	1	0.852299
GO:0010557	positive regulation of macromolecule biosynthetic process	CN164178		994302 MARC 4PIG Sus scrofa cDNA 5', mRNA sequence	1	0.862152
GO:0010557	positive regulation of macromolecule biosynthetic process	DN121268		1121355 MARC 4PIG Sus scrofa cDNA 3', mRNA sequence	1	0.862152
GO:0010557	positive regulation of macromolecule biosynthetic process	EW464984		rnmm24c_m17.y1 nmm Sus scrofa cDNA 5', mRNA sequence	1	0.862152
GO:0010558	negative regulation of macromolecule biosynthetic process	CK467405		938702 MARC 4PIG Sus scrofa cDNA 5', mRNA sequence	1	0.950015
GO:0010558	negative regulation of macromolecule biosynthetic process	EW316148		rpldo0102_g1.y1 ldo Sus scrofa cDNA 5', mRNA sequence	1	0.950015
GO:0010558	negative regulation of macromolecule biosynthetic process	EW421594		rnca11b_e13.y1 nca Sus scrofa cDNA 5', mRNA sequence	1	0.950015
GO:0010608	posttranscriptional regulation of gene expression	AK234633.1		Sus scrofa mRNA, clone:OVR010100E10, expressed in ovary	1	0.700246
GO:0010629	negative regulation of gene expression	CK467405		938702 MARC 4PIG Sus scrofa cDNA 5', mRNA sequence	1	1.05782
GO:0010629	negative regulation of gene expression	EW316148		rpldo0102_g1.y1 ldo Sus scrofa cDNA 5', mRNA sequence	1	1.05782
GO:0010629	negative regulation of gene expression	EW421594		rnca11b_e13.y1 nca Sus scrofa cDNA 5', mRNA sequence	1	1.05782
GO:0015849	organic acid transport	AK234908	LOC595127	Sus scrofa mRNA, clone:OVRM10028H08, expressed in ovary	1	1.4205
GO:0015931	nucleobase, nucleoside, nucleotide and nucleic acid transport	AK236617.1		Sus scrofa mRNA, clone:OVRM10208F03, expressed in ovary	1	1.27481
GO:0016055	Wnt receptor signaling pathway	BX923538		BX923538 Sus Scrofa library (scan) Sus scrofa cDNA clone scan0014.h.08 5prim, mRNA sequence	1	1.27481
GO:0016071	mRNA metabolic process	AK236404.1		Sus scrofa mRNA, clone:OVRM10189A09, expressed in ovary	1	1.06347
GO:0016071	mRNA metabolic process	BI182307		UNL-P-FN-bg-h-08-0-UNL.s1 UNL-P-FN Sus scrofa cDNA clone UNL-P-FN-bg-h-08-0-UNL 3', mRNA sequence	1	1.06347
GO:0016071	mRNA metabolic process	CK457656		921976 MARC 4PIG Sus scrofa cDNA 3', mRNA sequence	1	1.06347
GO:0016071	mRNA metabolic process	XM_001929236.1	LOC100157075	PREDICTED: Sus scrofa similar to snurportin 1 (LOC100157075), mRNA	1	1.06347
GO:0016481	negative regulation of transcription	CK467405		938702 MARC 4PIG Sus scrofa cDNA 5', mRNA sequence	1	1.0887
GO:0016481	negative regulation of transcription	EW316148		rpldo0102_g1.y1 ldo Sus scrofa cDNA 5', mRNA sequence	1	1.0887
GO:0016481	negative regulation of transcription	EW421594		rnca11b_e13.y1 nca Sus scrofa cDNA 5', mRNA sequence	1	1.0887
GO:0016567	protein ubiquitination	CK462437		933235 MARC 4PIG Sus scrofa cDNA 3', mRNA sequence	1	1.4205
GO:0018193	peptidyl-amino acid modification	EW290234		rjej38b_p21.y1 jej Sus scrofa cDNA 5', mRNA sequence	1	1.4205
GO:0019752	carboxylic acid metabolic process	AK239600.1		Sus scrofa mRNA, clone:THY010115C09, expressed in thymus	1	0.837934
GO:0019752	carboxylic acid metabolic process	NM_213897.1	ACADL	Sus scrofa acyl-Coenzyme A dehydrogenase, long chain (ACADL), nuclear gene encoding mitochondrial protein, mRNA	1	0.837934
GO:0019752	carboxylic acid metabolic process	NM_214039.1	ACADM	Sus scrofa acyl-Coenzyme A dehydrogenase, C-4 to C-12 straight chain (ACADM), nuclear gene encoding mitochondrial protein, mRNA	1	0.837934
GO:0022008	neurogenesis	AF329358.1	LAMB1	Sus scrofa laminin beta-1 chain mRNA, partial cds	1	0.994349
GO:0022008	neurogenesis	AK233000.1		Sus scrofa mRNA, clone:LVRM10065H01, expressed in liver	1	0.994349
GO:0022610	biological adhesion	AB237777.1	COL6A1	Sus scrofa COL6A1 mRNA fortype VI collagen alpha-1 chain, partial cds, C-terminal domain	1	1.03578
GO:0022610	biological adhesion	AF329358.1	LAMB1	Sus scrofa laminin beta-1 chain mRNA, partial cds	1	1.03578
GO:0022610	biological adhesion	BG385044		306626 MARC 1PIG Sus scrofa cDNA 5', mRNA sequence	1	1.03578
GO:0022610	biological adhesion	DN121268		1121355 MARC 4PIG Sus scrofa cDNA 3', mRNA sequence	1	1.03578
GO:0022610	biological adhesion	DT324183		SusFleck_BF_0033_0036_5_pCNS_D01 SusFleck Backfat Sus scrofa cDNA clone 0033_0036_D01 5', mRNA sequence	1	1.03578
GO:0030030	cell projection organization	AF329358.1	LAMB1	Sus scrofa laminin beta-1 chain mRNA, partial cds	1	0.662899
GO:0030334	regulation of cell migration	AF329358.1	LAMB1	Sus scrofa laminin beta-1 chain mRNA, partial cds	1	1.21262
GO:0031175	neurite development	AF329358.1	LAMB1	Sus scrofa laminin beta-1 chain mRNA, partial cds	1	1.05782
GO:0031327	negative regulation of cellular biosynthetic process	CK467405		938702 MARC 4PIG Sus scrofa cDNA 5', mRNA sequence	1	0.932202
GO:0031327	negative regulation of cellular biosynthetic process	EW316148		rpldo0102_g1.y1 ldo Sus scrofa cDNA 5', mRNA sequence	1	0.932202
GO:0031327	negative regulation of cellular biosynthetic process	EW421594		rnca11b_e13.y1 nca Sus scrofa cDNA 5', mRNA sequence	1	0.932202
GO:0031328	positive regulation of cellular biosynthetic process	CN164178		994302 MARC 4PIG Sus scrofa cDNA 5', mRNA sequence	1	0.852299
GO:0031328	positive regulation of cellular biosynthetic process	DN121268		1121355 MARC 4PIG Sus scrofa cDNA 3', mRNA sequence	1	0.852299
GO:0031328	positive regulation of cellular biosynthetic process	EW464984		rnmm24c_m17.y1 nmm Sus scrofa cDNA 5', mRNA sequence	1	0.852299
GO:0032446	protein modification by small protein conjugation	CK462437		933235 MARC 4PIG Sus scrofa cDNA 3', mRNA sequence	1	1.38104
GO:0032502	developmental process	AF329358.1	LAMB1	Sus scrofa laminin beta-1 chain mRNA, partial cds	1	0.997341
GO:0032502	developmental process	AK232555.1		Sus scrofa mRNA, clone:LVR010073A12, expressed in liver	1	0.997341
GO:0032502	developmental process	AK233000.1		Sus scrofa mRNA, clone:LVRM10065H01, expressed in liver	1	0.997341
GO:0032502	developmental process	AK235603.1		Sus scrofa mRNA, clone:OVRM10097A03, expressed in ovary	1	0.997341
GO:0032502	developmental process	AK239887.1		Sus scrofa mRNA, clone:UTR010007G10, expressed in uterus	1	0.997341
GO:0032502	developmental process	AY610166.1		Sus scrofa clone Clu_8309.scr.msk.p1.Contig3, mRNA sequence	1	0.997341
GO:0032502	developmental process	AY610295.1		Sus scrofa clone rcsk04_o4.y1.abd, mRNA sequence	1	0.997341
GO:0032502	developmental process	BX672955		BX672955 Sus Scrofa library (scac) Sus scrofa cDNA clone scac0044.o.04 5prim, mRNA sequence	1	0.997341
GO:0032502	developmental process	BX923538		BX923538 Sus Scrofa library (scan) Sus scrofa cDNA clone scan0014.h.08 5prim, mRNA sequence	1	0.997341
GO:0032502	developmental process	BX924637		BX924637 Sus Scrofa library (scan) Sus scrofa cDNA clone scan0017.d.21 5prim, mRNA sequence	1	0.997341
GO:0032502	developmental process	BX925993		BX925993 Sus Scrofa library (scan) Sus scrofa cDNA clone scan0021.f.19 5prim, mRNA sequence	1	0.997341
GO:0032502	developmental process	CN164178		994302 MARC 4PIG Sus scrofa cDNA 5', mRNA sequence	1	0.997341
GO:0032502	developmental process	DN118117		1117841 MARC 4PIG Sus scrofa cDNA 5', mRNA sequence	1	0.997341
GO:0032502	developmental process	DN124736		1138534 MARC 4PIG Sus scrofa cDNA 5', mRNA sequence	1	0.997341
GO:0032502	developmental process	DN128580		1142660 MARC 4PIG Sus scrofa cDNA 3', mRNA sequence	1	0.997341
GO:0032502	developmental process	DT324183		SusFleck_BF_0033_0036_5_pCNS_D01 SusFleck Backfat Sus scrofa cDNA clone 0033_0036_D01 5', mRNA sequence	1	0.997341
GO:0032502	developmental process	DV904076		POSM0605028_M02R porcine skeletal muscle cDNA library (PoSM) Sus scrofa cDNA 3', mRNA sequence	1	0.997341
GO:0032502	developmental process	EW328139		rpliv0112_a9.y1 liv Sus scrofa cDNA 5', mRNA sequence	1	0.997341
GO:0032502	developmental process	EW421594		rnca11b_e13.y1 nca Sus scrofa cDNA 5', mRNA sequence	1	0.997341
GO:0032502	developmental process	NM_001105288.1	COL5A3	Sus scrofa collagen, type V, alpha 3 (COL5A3), mRNA	1	0.997341
GO:0040011	locomotion	DT324183		SusFleck_BF_0033_0036_5_pCNS_D01 SusFleck Backfat Sus scrofa cDNA clone 0033_0036_D01 5', mRNA sequence	1	1.03578
GO:0040011	locomotion	XM_001927973.1	LOC100156397	PREDICTED: Sus scrofa similar to SCY1-like 3 (LOC100156397), mRNA	1	1.03578
GO:0040012	regulation of locomotion	AF329358.1	LAMB1	Sus scrofa laminin beta-1 chain mRNA, partial cds	1	1.18375
GO:0042035	regulation of cytokine biosynthetic process	CN164178		994302 MARC 4PIG Sus scrofa cDNA 5', mRNA sequence	1	1.38104
GO:0042060	wound healing	AK236127.1		Sus scrofa mRNA, clone:OVRM10155A01, expressed in ovary	1	1.4205
GO:0045321	leukocyte activation	CN164178		994302 MARC 4PIG Sus scrofa cDNA 5', mRNA sequence	1	0.789166
GO:0045934	negative regulation of nucleobase, nucleoside, nucleotide and nucleic acid metabolic process	CK467405		938702 MARC 4PIG Sus scrofa cDNA 5', mRNA sequence	1	0.987764
GO:0045934	negative regulation of nucleobase, nucleoside, nucleotide and nucleic acid metabolic process	EW316148		rpldo0102_g1.y1 ldo Sus scrofa cDNA 5', mRNA sequence	1	0.987764
GO:0045934	negative regulation of nucleobase, nucleoside, nucleotide and nucleic acid metabolic process	EW421594		rnca11b_e13.y1 nca Sus scrofa cDNA 5', mRNA sequence	1	0.987764
GO:0046649	lymphocyte activation	CN164178		994302 MARC 4PIG Sus scrofa cDNA 5', mRNA sequence	1	0.994349
GO:0046942	carboxylic acid transport	AK234908	LOC595127	Sus scrofa mRNA, clone:OVRM10028H08, expressed in ovary	1	1.4205
GO:0048583	regulation of response to stimulus	CK454638		915131 MARC 4PIG Sus scrofa cDNA 5', mRNA sequence	1	0.720543
GO:0048666	neuron development	AF329358.1	LAMB1	Sus scrofa laminin beta-1 chain mRNA, partial cds	1	0.842668
GO:0048699	generation of neurons	AF329358.1	LAMB1	Sus scrofa laminin beta-1 chain mRNA, partial cds	1	1.10483
GO:0048699	generation of neurons	AK233000.1		Sus scrofa mRNA, clone:LVRM10065H01, expressed in liver	1	1.10483
GO:0050776	regulation of immune response	CK454638		915131 MARC 4PIG Sus scrofa cDNA 5', mRNA sequence	1	1.05782
GO:0050793	regulation of developmental process	AK232555.1		Sus scrofa mRNA, clone:LVR010073A12, expressed in liver	1	1.02059
GO:0050793	regulation of developmental process	AK235751.1		Sus scrofa mRNA, clone:OVRM10111E07, expressed in ovary	1	1.02059
GO:0050793	regulation of developmental process	AK239728.1		Sus scrofa mRNA, clone:THY010126C02, expressed in thymus	1	1.02059
GO:0050793	regulation of developmental process	BX915041		BX915041 Sus Scrofa library (scan) Sus scrofa cDNA clone scan0027.c.13 5prim, mRNA sequence	1	1.02059
GO:0050793	regulation of developmental process	CK467405		938702 MARC 4PIG Sus scrofa cDNA 5', mRNA sequence	1	1.02059
GO:0050793	regulation of developmental process	EW421594		rnca11b_e13.y1 nca Sus scrofa cDNA 5', mRNA sequence	1	1.02059
GO:0050793	regulation of developmental process	XM_001925866.1	LOC100152572	PREDICTED: Sus scrofa similar to MLK-related kinase (LOC100152572), mRNA	1	1.02059
GO:0051186	cofactor metabolic process	AY214329.1	LOC403161	Sus scrofa nicotinate phosphoribosyltransferase-like protein mRNA, partial cds	1	0.801894
GO:0051259	protein oligomerization	NM_001097486.1	ATPIF1	Sus scrofa ATPase inhibitory factor 1 (ATPIF1), nuclear gene encoding mitochondrial protein, mRNA	1	1.15622
GO:0051270	regulation of cell motion	AF329358.1	LAMB1	Sus scrofa laminin beta-1 chain mRNA, partial cds	1	1.08081
GO:0051325	interphase	BX915041		BX915041 Sus Scrofa library (scan) Sus scrofa cDNA clone scan0027.c.13 5prim, mRNA sequence	1	1.30835
GO:0051329	interphase of mitotic cell cycle	BX915041		BX915041 Sus Scrofa library (scan) Sus scrofa cDNA clone scan0027.c.13 5prim, mRNA sequence	1	1.34371
GO:0051704	multi-organism process	AK230570.1	LOC100152238	Sus scrofa mRNA, clone:AMP010011B05, expressed in alveolar macrophage	1	1.02864
GO:0051704	multi-organism process	AK236404.1		Sus scrofa mRNA, clone:OVRM10189A09, expressed in ovary	1	1.02864
GO:0051704	multi-organism process	EW316148		rpldo0102_g1.y1 ldo Sus scrofa cDNA 5', mRNA sequence	1	1.02864
GO:0051726	regulation of cell cycle	AK234932.1		Sus scrofa mRNA, clone:OVRM10033G12, expressed in ovary	1	0.770813
GO:0051726	regulation of cell cycle	XM_001925866.1	LOC100152572	PREDICTED: Sus scrofa similar to MLK-related kinase (LOC100152572), mRNA	1	0.770813
GO:0055086	nucleobase, nucleoside and nucleotide metabolic process	AY214329.1	LOC403161	Sus scrofa nicotinate phosphoribosyltransferase-like protein mRNA, partial cds	1	0.613796
GO:0065004	protein-DNA complex assembly	BX918412		BX918412 Sus Scrofa library (scan) Sus scrofa cDNA clone scan0038.i.09 5prim, mRNA sequence	1	1.15622

## Sheet: Landrace-profile 68(dpc)
GO_id	GO_name	genebank	Gene symbol	Gene Description	Pvalue	Enrichment
GO:0006091	generation of precursor metabolites and energy	AK236182.1		Sus scrofa mRNA, clone:OVRM10161E01, expressed in ovary	1.78845e-06	18.4733
GO:0006091	generation of precursor metabolites and energy	AK236324.1		Sus scrofa mRNA, clone:OVRM10181E04, expressed in ovary	1.78845e-06	18.4733
GO:0006091	generation of precursor metabolites and energy	AK236587.1		Sus scrofa mRNA, clone:OVRM10206D03, expressed in ovary	1.78845e-06	18.4733
GO:0006091	generation of precursor metabolites and energy	AK236752.1		Sus scrofa mRNA, clone:OVRM10224E06, expressed in ovary	1.78845e-06	18.4733
GO:0006091	generation of precursor metabolites and energy	BP142174		BP142174 full-length enriched swine cDNA library, adult ovary Sus scrofa cDNA clone OVR010014C02 5', mRNA sequence	1.78845e-06	18.4733
GO:0006091	generation of precursor metabolites and energy	NM_001044554.1	LOC733605	Sus scrofa NADH dehydrogenase 1 beta subcomplex 6 (LOC733605), mRNA	1.78845e-06	18.4733
GO:0006120	mitochondrial electron transport, NADH to ubiquinone	AK236182.1		Sus scrofa mRNA, clone:OVRM10161E01, expressed in ovary	2.30749e-05	292.494
GO:0006120	mitochondrial electron transport, NADH to ubiquinone	AK236752.1		Sus scrofa mRNA, clone:OVRM10224E06, expressed in ovary	2.30749e-05	292.494
GO:0022900	electron transport chain	AK236182.1		Sus scrofa mRNA, clone:OVRM10161E01, expressed in ovary	9.31481e-05	20.172
GO:0022900	electron transport chain	AK236752.1		Sus scrofa mRNA, clone:OVRM10224E06, expressed in ovary	9.31481e-05	20.172
GO:0022900	electron transport chain	BP142174		BP142174 full-length enriched swine cDNA library, adult ovary Sus scrofa cDNA clone OVR010014C02 5', mRNA sequence	9.31481e-05	20.172
GO:0022900	electron transport chain	NM_001044554.1	LOC733605	Sus scrofa NADH dehydrogenase 1 beta subcomplex 6 (LOC733605), mRNA	9.31481e-05	20.172
GO:0042773	ATP synthesis coupled electron transport	AK236182.1		Sus scrofa mRNA, clone:OVRM10161E01, expressed in ovary	0.000137835	146.247
GO:0042773	ATP synthesis coupled electron transport	AK236752.1		Sus scrofa mRNA, clone:OVRM10224E06, expressed in ovary	0.000137835	146.247
GO:0042775	mitochondrial ATP synthesis coupled electron transport	AK236182.1		Sus scrofa mRNA, clone:OVRM10161E01, expressed in ovary	0.000137835	146.247
GO:0042775	mitochondrial ATP synthesis coupled electron transport	AK236752.1		Sus scrofa mRNA, clone:OVRM10224E06, expressed in ovary	0.000137835	146.247
GO:0006119	oxidative phosphorylation	AK236182.1		Sus scrofa mRNA, clone:OVRM10161E01, expressed in ovary	0.000137835	146.247
GO:0006119	oxidative phosphorylation	AK236752.1		Sus scrofa mRNA, clone:OVRM10224E06, expressed in ovary	0.000137835	146.247
GO:0055114	oxidation reduction	AK234693.1		Sus scrofa mRNA, clone:OVRM10007H07, expressed in ovary	0.000212003	6.45885
GO:0055114	oxidation reduction	AK236182.1		Sus scrofa mRNA, clone:OVRM10161E01, expressed in ovary	0.000212003	6.45885
GO:0055114	oxidation reduction	AK236324.1		Sus scrofa mRNA, clone:OVRM10181E04, expressed in ovary	0.000212003	6.45885
GO:0055114	oxidation reduction	AK236752.1		Sus scrofa mRNA, clone:OVRM10224E06, expressed in ovary	0.000212003	6.45885
GO:0055114	oxidation reduction	BP142174		BP142174 full-length enriched swine cDNA library, adult ovary Sus scrofa cDNA clone OVR010014C02 5', mRNA sequence	0.000212003	6.45885
GO:0055114	oxidation reduction	EW281003		rjca16c_o15.y1 jca Sus scrofa cDNA 5', mRNA sequence	0.000212003	6.45885
GO:0055114	oxidation reduction	NM_001044554.1	LOC733605	Sus scrofa NADH dehydrogenase 1 beta subcomplex 6 (LOC733605), mRNA	0.000212003	6.45885
GO:0022904	respiratory electron transport chain	AK236182.1		Sus scrofa mRNA, clone:OVRM10161E01, expressed in ovary	0.000637543	73.1234
GO:0022904	respiratory electron transport chain	AK236752.1		Sus scrofa mRNA, clone:OVRM10224E06, expressed in ovary	0.000637543	73.1234
GO:0045213	neurotransmitter receptor metabolic process	CK454516		915002 MARC 4PIG Sus scrofa cDNA 5', mRNA sequence	0.00683776	292.494
GO:0015980	energy derivation by oxidation of organic compounds	AK236182.1		Sus scrofa mRNA, clone:OVRM10161E01, expressed in ovary	0.00882441	20.172
GO:0015980	energy derivation by oxidation of organic compounds	AK236587.1		Sus scrofa mRNA, clone:OVRM10206D03, expressed in ovary	0.00882441	20.172
GO:0006631	fatty acid metabolic process	AK236752.1		Sus scrofa mRNA, clone:OVRM10224E06, expressed in ovary	0.00952541	8.86344
GO:0006631	fatty acid metabolic process	AK239646.1		Sus scrofa mRNA, clone:THY010118H06, expressed in thymus	0.00952541	8.86344
GO:0006631	fatty acid metabolic process	XM_001927243.1	LOC100152491	PREDICTED: Sus scrofa similar to Lysophospholipase I (LOC100152491), partial mRNA	0.00952541	8.86344
GO:0003008	system process	BI185477		UNL-P-FN-cw-b-12-0-UNL.s1 UNL-P-FN Sus scrofa cDNA clone UNL-P-FN-cw-b-12-0-UNL 3', mRNA sequence	0.0111214	5.65205
GO:0003008	system process	BX665103		BX665103 Sus Scrofa library (scag) Sus scrofa cDNA clone scag0004.c.03 5prim, mRNA sequence	0.0111214	5.65205
GO:0003008	system process	BX673343		BX673343 Sus Scrofa library (scac) Sus scrofa cDNA clone scac0038.m.11 5prim, mRNA sequence	0.0111214	5.65205
GO:0003008	system process	CK454516		915002 MARC 4PIG Sus scrofa cDNA 5', mRNA sequence	0.0111214	5.65205
GO:0051881	regulation of mitochondrial membrane potential	AK236182.1		Sus scrofa mRNA, clone:OVRM10161E01, expressed in ovary	0.0136524	146.247
GO:0032787	monocarboxylic acid metabolic process	AK236752.1		Sus scrofa mRNA, clone:OVRM10224E06, expressed in ovary	0.0162061	7.31234
GO:0032787	monocarboxylic acid metabolic process	AK239646.1		Sus scrofa mRNA, clone:THY010118H06, expressed in thymus	0.0162061	7.31234
GO:0032787	monocarboxylic acid metabolic process	XM_001927243.1	LOC100152491	PREDICTED: Sus scrofa similar to Lysophospholipase I (LOC100152491), partial mRNA	0.0162061	7.31234
GO:0001967	suckling behavior	BX665103		BX665103 Sus Scrofa library (scag) Sus scrofa cDNA clone scag0004.c.03 5prim, mRNA sequence	0.0204441	97.4978
GO:0009250	glucan biosynthetic process	AK236587.1		Sus scrofa mRNA, clone:OVRM10206D03, expressed in ovary	0.0272129	73.1234
GO:0005978	glycogen biosynthetic process	AK236587.1		Sus scrofa mRNA, clone:OVRM10206D03, expressed in ovary	0.0272129	73.1234
GO:0006936	muscle contraction	BI185477		UNL-P-FN-cw-b-12-0-UNL.s1 UNL-P-FN Sus scrofa cDNA clone UNL-P-FN-cw-b-12-0-UNL 3', mRNA sequence	0.0273975	11.2498
GO:0006936	muscle contraction	BX673343		BX673343 Sus Scrofa library (scac) Sus scrofa cDNA clone scac0038.m.11 5prim, mRNA sequence	0.0273975	11.2498
GO:0003012	muscle system process	BI185477		UNL-P-FN-cw-b-12-0-UNL.s1 UNL-P-FN Sus scrofa cDNA clone UNL-P-FN-cw-b-12-0-UNL 3', mRNA sequence	0.0273975	11.2498
GO:0003012	muscle system process	BX673343		BX673343 Sus Scrofa library (scac) Sus scrofa cDNA clone scac0038.m.11 5prim, mRNA sequence	0.0273975	11.2498
GO:0046716	muscle maintenance	CK454516		915002 MARC 4PIG Sus scrofa cDNA 5', mRNA sequence	0.0339588	58.4987
GO:0051705	behavioral interaction between organisms	BX665103		BX665103 Sus Scrofa library (scag) Sus scrofa cDNA clone scag0004.c.03 5prim, mRNA sequence	0.040682	48.7489
GO:0033692	cellular polysaccharide biosynthetic process	AK236587.1		Sus scrofa mRNA, clone:OVRM10206D03, expressed in ovary	0.040682	48.7489
GO:0007631	feeding behavior	BX665103		BX665103 Sus Scrofa library (scag) Sus scrofa cDNA clone scag0004.c.03 5prim, mRNA sequence	0.040682	48.7489
GO:0000271	polysaccharide biosynthetic process	AK236587.1		Sus scrofa mRNA, clone:OVRM10206D03, expressed in ovary	0.040682	48.7489
GO:0019752	carboxylic acid metabolic process	AK236752.1		Sus scrofa mRNA, clone:OVRM10224E06, expressed in ovary	0.0463517	4.92967
GO:0019752	carboxylic acid metabolic process	AK239646.1		Sus scrofa mRNA, clone:THY010118H06, expressed in thymus	0.0463517	4.92967
GO:0019752	carboxylic acid metabolic process	XM_001927243.1	LOC100152491	PREDICTED: Sus scrofa similar to Lysophospholipase I (LOC100152491), partial mRNA	0.0463517	4.92967
GO:0006082	organic acid metabolic process	AK236752.1		Sus scrofa mRNA, clone:OVRM10224E06, expressed in ovary	0.0463517	4.92967
GO:0006082	organic acid metabolic process	AK239646.1		Sus scrofa mRNA, clone:THY010118H06, expressed in thymus	0.0463517	4.92967
GO:0006082	organic acid metabolic process	XM_001927243.1	LOC100152491	PREDICTED: Sus scrofa similar to Lysophospholipase I (LOC100152491), partial mRNA	0.0463517	4.92967
GO:0006096	glycolysis	AK236324.1		Sus scrofa mRNA, clone:OVRM10181E04, expressed in ovary	0.0473824	41.7848
GO:0043112	receptor metabolic process	CK454516		915002 MARC 4PIG Sus scrofa cDNA 5', mRNA sequence	0.0473824	41.7848
GO:0019725	cellular homeostasis	AK236182.1		Sus scrofa mRNA, clone:OVRM10161E01, expressed in ovary	0.0518591	8.01352
GO:0019725	cellular homeostasis	CK454516		915002 MARC 4PIG Sus scrofa cDNA 5', mRNA sequence	0.0518591	8.01352
GO:0044262	cellular carbohydrate metabolic process	AK236324.1		Sus scrofa mRNA, clone:OVRM10181E04, expressed in ovary	0.0531834	7.90523
GO:0044262	cellular carbohydrate metabolic process	AK236587.1		Sus scrofa mRNA, clone:OVRM10206D03, expressed in ovary	0.0531834	7.90523
GO:0007606	sensory perception of chemical stimulus	BX665103		BX665103 Sus Scrofa library (scag) Sus scrofa cDNA clone scag0004.c.03 5prim, mRNA sequence	0.0540603	36.5617
GO:0007608	sensory perception of smell	BX665103		BX665103 Sus Scrofa library (scag) Sus scrofa cDNA clone scag0004.c.03 5prim, mRNA sequence	0.0540603	36.5617
GO:0046164	alcohol catabolic process	AK236324.1		Sus scrofa mRNA, clone:OVRM10181E04, expressed in ovary	0.0607156	32.4993
GO:0006007	glucose catabolic process	AK236324.1		Sus scrofa mRNA, clone:OVRM10181E04, expressed in ovary	0.0607156	32.4993
GO:0019320	hexose catabolic process	AK236324.1		Sus scrofa mRNA, clone:OVRM10181E04, expressed in ovary	0.0607156	32.4993
GO:0046365	monosaccharide catabolic process	AK236324.1		Sus scrofa mRNA, clone:OVRM10181E04, expressed in ovary	0.0607156	32.4993
GO:0006611	protein export from nucleus	AY609457.1		Sus scrofa clone Clu_12124.scr.msk.p1.Contig3, mRNA sequence	0.0607156	32.4993
GO:0001570	vasculogenesis	EW088403		recc2833c_i12.y1 ecc Sus scrofa cDNA 5', mRNA sequence	0.0607156	32.4993
GO:0032501	multicellular organismal process	AK234858.1		Sus scrofa mRNA, clone:OVRM10024B02, expressed in ovary	0.0724323	2.24502
GO:0032501	multicellular organismal process	BI185477		UNL-P-FN-cw-b-12-0-UNL.s1 UNL-P-FN Sus scrofa cDNA clone UNL-P-FN-cw-b-12-0-UNL 3', mRNA sequence	0.0724323	2.24502
GO:0032501	multicellular organismal process	BX665103		BX665103 Sus Scrofa library (scag) Sus scrofa cDNA clone scag0004.c.03 5prim, mRNA sequence	0.0724323	2.24502
GO:0032501	multicellular organismal process	BX673343		BX673343 Sus Scrofa library (scac) Sus scrofa cDNA clone scac0038.m.11 5prim, mRNA sequence	0.0724323	2.24502
GO:0032501	multicellular organismal process	CK454516		915002 MARC 4PIG Sus scrofa cDNA 5', mRNA sequence	0.0724323	2.24502
GO:0032501	multicellular organismal process	CV875685		PDUts1142E07 Porcine testis cDNA library I Sus scrofa cDNA clone PDUts1142E07 5' similar to homologue to ref|NM_025980.1| Mus musculus Notch-regulated ankyrin repeat protein (Nrarp), mRNA, mRNA sequence	0.0724323	2.24502
GO:0032501	multicellular organismal process	EW088403		recc2833c_i12.y1 ecc Sus scrofa cDNA 5', mRNA sequence	0.0724323	2.24502
GO:0042391	regulation of membrane potential	AK236182.1		Sus scrofa mRNA, clone:OVRM10161E01, expressed in ovary	0.0739588	26.5903
GO:0044275	cellular carbohydrate catabolic process	AK236324.1		Sus scrofa mRNA, clone:OVRM10181E04, expressed in ovary	0.0805469	24.3745
GO:0005977	glycogen metabolic process	AK236587.1		Sus scrofa mRNA, clone:OVRM10206D03, expressed in ovary	0.0805469	24.3745
GO:0046034	ATP metabolic process	AK236182.1		Sus scrofa mRNA, clone:OVRM10161E01, expressed in ovary	0.0871128	22.4995
GO:0016052	carbohydrate catabolic process	AK236324.1		Sus scrofa mRNA, clone:OVRM10181E04, expressed in ovary	0.0871128	22.4995
GO:0006112	energy reserve metabolic process	AK236587.1		Sus scrofa mRNA, clone:OVRM10206D03, expressed in ovary	0.0871128	22.4995
GO:0009144	purine nucleoside triphosphate metabolic process	AK236182.1		Sus scrofa mRNA, clone:OVRM10161E01, expressed in ovary	0.0871128	22.4995
GO:0009205	purine ribonucleoside triphosphate metabolic process	AK236182.1		Sus scrofa mRNA, clone:OVRM10161E01, expressed in ovary	0.0871128	22.4995
GO:0009199	ribonucleoside triphosphate metabolic process	AK236182.1		Sus scrofa mRNA, clone:OVRM10161E01, expressed in ovary	0.0871128	22.4995
GO:0006073	glucan metabolic process	AK236587.1		Sus scrofa mRNA, clone:OVRM10206D03, expressed in ovary	0.0936565	20.8924
GO:0007030	Golgi organization	EV867707		rpbfe0123_n8.y1 bfe Sus scrofa cDNA 5', mRNA sequence	0.0936565	20.8924
GO:0045333	cellular respiration	AK236182.1		Sus scrofa mRNA, clone:OVRM10161E01, expressed in ovary	0.100178	19.4996
GO:0044264	cellular polysaccharide metabolic process	AK236587.1		Sus scrofa mRNA, clone:OVRM10206D03, expressed in ovary	0.106678	18.2808
GO:0009141	nucleoside triphosphate metabolic process	AK236182.1		Sus scrofa mRNA, clone:OVRM10161E01, expressed in ovary	0.106678	18.2808
GO:0005976	polysaccharide metabolic process	AK236587.1		Sus scrofa mRNA, clone:OVRM10206D03, expressed in ovary	0.106678	18.2808
GO:0032502	developmental process	AK234858.1		Sus scrofa mRNA, clone:OVRM10024B02, expressed in ovary	0.107894	2.05362
GO:0032502	developmental process	AK236182.1		Sus scrofa mRNA, clone:OVRM10161E01, expressed in ovary	0.107894	2.05362
GO:0032502	developmental process	BX665103		BX665103 Sus Scrofa library (scag) Sus scrofa cDNA clone scag0004.c.03 5prim, mRNA sequence	0.107894	2.05362
GO:0032502	developmental process	CK454516		915002 MARC 4PIG Sus scrofa cDNA 5', mRNA sequence	0.107894	2.05362
GO:0032502	developmental process	CV875685		PDUts1142E07 Porcine testis cDNA library I Sus scrofa cDNA clone PDUts1142E07 5' similar to homologue to ref|NM_025980.1| Mus musculus Notch-regulated ankyrin repeat protein (Nrarp), mRNA, mRNA sequence	0.107894	2.05362
GO:0032502	developmental process	EV867707		rpbfe0123_n8.y1 bfe Sus scrofa cDNA 5', mRNA sequence	0.107894	2.05362
GO:0032502	developmental process	EW088403		recc2833c_i12.y1 ecc Sus scrofa cDNA 5', mRNA sequence	0.107894	2.05362
GO:0050877	neurological system process	BX665103		BX665103 Sus Scrofa library (scag) Sus scrofa cDNA clone scag0004.c.03 5prim, mRNA sequence	0.121712	4.99989
GO:0050877	neurological system process	CK454516		915002 MARC 4PIG Sus scrofa cDNA 5', mRNA sequence	0.121712	4.99989
GO:0044255	cellular lipid metabolic process	AK236752.1		Sus scrofa mRNA, clone:OVRM10224E06, expressed in ovary	0.123798	3.32379
GO:0044255	cellular lipid metabolic process	AK239646.1		Sus scrofa mRNA, clone:THY010118H06, expressed in thymus	0.123798	3.32379
GO:0044255	cellular lipid metabolic process	XM_001927243.1	LOC100152491	PREDICTED: Sus scrofa similar to Lysophospholipase I (LOC100152491), partial mRNA	0.123798	3.32379
GO:0006800	oxygen and reactive oxygen species metabolic process	AK236182.1		Sus scrofa mRNA, clone:OVRM10161E01, expressed in ovary	0.126045	15.3944
GO:0009150	purine ribonucleotide metabolic process	AK236182.1		Sus scrofa mRNA, clone:OVRM10161E01, expressed in ovary	0.126045	15.3944
GO:0006006	glucose metabolic process	AK236324.1		Sus scrofa mRNA, clone:OVRM10181E04, expressed in ovary	0.151564	12.7171
GO:0042592	homeostatic process	AK236182.1		Sus scrofa mRNA, clone:OVRM10161E01, expressed in ovary	0.156063	4.33324
GO:0042592	homeostatic process	CK454516		915002 MARC 4PIG Sus scrofa cDNA 5', mRNA sequence	0.156063	4.33324
GO:0032147	activation of protein kinase activity	AY609457.1		Sus scrofa clone Clu_12124.scr.msk.p1.Contig3, mRNA sequence	0.15789	12.1872
GO:0006997	nucleus organization	EV867707		rpbfe0123_n8.y1 bfe Sus scrofa cDNA 5', mRNA sequence	0.15789	12.1872
GO:0009259	ribonucleotide metabolic process	AK236182.1		Sus scrofa mRNA, clone:OVRM10161E01, expressed in ovary	0.15789	12.1872
GO:0005975	carbohydrate metabolic process	AK236324.1		Sus scrofa mRNA, clone:OVRM10181E04, expressed in ovary	0.164069	4.20854
GO:0005975	carbohydrate metabolic process	AK236587.1		Sus scrofa mRNA, clone:OVRM10206D03, expressed in ovary	0.164069	4.20854
GO:0034637	cellular carbohydrate biosynthetic process	AK236587.1		Sus scrofa mRNA, clone:OVRM10206D03, expressed in ovary	0.164195	11.6997
GO:0051168	nuclear export	AY609457.1		Sus scrofa clone Clu_12124.scr.msk.p1.Contig3, mRNA sequence	0.176741	10.8331
GO:0016051	carbohydrate biosynthetic process	AK236587.1		Sus scrofa mRNA, clone:OVRM10206D03, expressed in ovary	0.189201	10.086
GO:0042692	muscle cell differentiation	EV867707		rpbfe0123_n8.y1 bfe Sus scrofa cDNA 5', mRNA sequence	0.1954	9.74978
GO:0007275	multicellular organismal development	AK234858.1		Sus scrofa mRNA, clone:OVRM10024B02, expressed in ovary	0.201117	2.02839
GO:0007275	multicellular organismal development	BX665103		BX665103 Sus Scrofa library (scag) Sus scrofa cDNA clone scag0004.c.03 5prim, mRNA sequence	0.201117	2.02839
GO:0007275	multicellular organismal development	CK454516		915002 MARC 4PIG Sus scrofa cDNA 5', mRNA sequence	0.201117	2.02839
GO:0007275	multicellular organismal development	CV875685		PDUts1142E07 Porcine testis cDNA library I Sus scrofa cDNA clone PDUts1142E07 5' similar to homologue to ref|NM_025980.1| Mus musculus Notch-regulated ankyrin repeat protein (Nrarp), mRNA, mRNA sequence	0.201117	2.02839
GO:0007275	multicellular organismal development	EW088403		recc2833c_i12.y1 ecc Sus scrofa cDNA 5', mRNA sequence	0.201117	2.02839
GO:0060249	anatomical structure homeostasis	CK454516		915002 MARC 4PIG Sus scrofa cDNA 5', mRNA sequence	0.201578	9.43527
GO:0006633	fatty acid biosynthetic process	AK236752.1		Sus scrofa mRNA, clone:OVRM10224E06, expressed in ovary	0.201578	9.43527
GO:0006163	purine nucleotide metabolic process	AK236182.1		Sus scrofa mRNA, clone:OVRM10161E01, expressed in ovary	0.201578	9.43527
GO:0007519	skeletal muscle development	CK454516		915002 MARC 4PIG Sus scrofa cDNA 5', mRNA sequence	0.201578	9.43527
GO:0007268	synaptic transmission	CK454516		915002 MARC 4PIG Sus scrofa cDNA 5', mRNA sequence	0.207735	9.14042
GO:0006629	lipid metabolic process	AK236752.1		Sus scrofa mRNA, clone:OVRM10224E06, expressed in ovary	0.21019	2.64301
GO:0006629	lipid metabolic process	AK239646.1		Sus scrofa mRNA, clone:THY010118H06, expressed in thymus	0.21019	2.64301
GO:0006629	lipid metabolic process	XM_001927243.1	LOC100152491	PREDICTED: Sus scrofa similar to Lysophospholipase I (LOC100152491), partial mRNA	0.21019	2.64301
GO:0019318	hexose metabolic process	AK236324.1		Sus scrofa mRNA, clone:OVRM10181E04, expressed in ovary	0.219987	8.60275
GO:0005996	monosaccharide metabolic process	AK236324.1		Sus scrofa mRNA, clone:OVRM10181E04, expressed in ovary	0.226082	8.35696
GO:0019226	transmission of nerve impulse	CK454516		915002 MARC 4PIG Sus scrofa cDNA 5', mRNA sequence	0.23821	7.90523
GO:0046394	carboxylic acid biosynthetic process	AK236752.1		Sus scrofa mRNA, clone:OVRM10224E06, expressed in ovary	0.244243	7.6972
GO:0016053	organic acid biosynthetic process	AK236752.1		Sus scrofa mRNA, clone:OVRM10224E06, expressed in ovary	0.244243	7.6972
GO:0048514	blood vessel morphogenesis	EW088403		recc2833c_i12.y1 ecc Sus scrofa cDNA 5', mRNA sequence	0.256249	7.31234
GO:0030154	cell differentiation	AK234858.1		Sus scrofa mRNA, clone:OVRM10024B02, expressed in ovary	0.257233	2.41066
GO:0030154	cell differentiation	EV867707		rpbfe0123_n8.y1 bfe Sus scrofa cDNA 5', mRNA sequence	0.257233	2.41066
GO:0030154	cell differentiation	EW088403		recc2833c_i12.y1 ecc Sus scrofa cDNA 5', mRNA sequence	0.257233	2.41066
GO:0043283	biopolymer metabolic process	AK236587.1		Sus scrofa mRNA, clone:OVRM10206D03, expressed in ovary	0.275192	0.420249
GO:0043283	biopolymer metabolic process	BX665103		BX665103 Sus Scrofa library (scag) Sus scrofa cDNA clone scag0004.c.03 5prim, mRNA sequence	0.275192	0.420249
GO:0001568	blood vessel development	EW088403		recc2833c_i12.y1 ecc Sus scrofa cDNA 5', mRNA sequence	0.309278	5.96926
GO:0014706	striated muscle development	CK454516		915002 MARC 4PIG Sus scrofa cDNA 5', mRNA sequence	0.320844	5.73517
GO:0048869	cellular developmental process	AK234858.1		Sus scrofa mRNA, clone:OVRM10024B02, expressed in ovary	0.322375	2.16662
GO:0048869	cellular developmental process	EV867707		rpbfe0123_n8.y1 bfe Sus scrofa cDNA 5', mRNA sequence	0.322375	2.16662
GO:0048869	cellular developmental process	EW088403		recc2833c_i12.y1 ecc Sus scrofa cDNA 5', mRNA sequence	0.322375	2.16662
GO:0001944	vasculature development	EW088403		recc2833c_i12.y1 ecc Sus scrofa cDNA 5', mRNA sequence	0.326598	5.62488
GO:0045860	positive regulation of protein kinase activity	AY609457.1		Sus scrofa clone Clu_12124.scr.msk.p1.Contig3, mRNA sequence	0.332333	5.51875
GO:0033674	positive regulation of kinase activity	AY609457.1		Sus scrofa clone Clu_12124.scr.msk.p1.Contig3, mRNA sequence	0.338048	5.41655
GO:0051347	positive regulation of transferase activity	AY609457.1		Sus scrofa clone Clu_12124.scr.msk.p1.Contig3, mRNA sequence	0.338048	5.41655
GO:0019538	protein metabolic process	BX665103		BX665103 Sus Scrofa library (scag) Sus scrofa cDNA clone scag0004.c.03 5prim, mRNA sequence	0.350488	0.320365
GO:0000122	negative regulation of transcription from RNA polymerase II promoter	CK467896		939242 MARC 4PIG Sus scrofa cDNA 5', mRNA sequence	0.355077	5.13147
GO:0010648	negative regulation of cell communication	NM_214356.1	RGS5	Sus scrofa regulator of G-protein signaling 5 (RGS5), mRNA	0.360715	5.04299
GO:0009968	negative regulation of signal transduction	NM_214356.1	RGS5	Sus scrofa regulator of G-protein signaling 5 (RGS5), mRNA	0.360715	5.04299
GO:0044267	cellular protein metabolic process	BX665103		BX665103 Sus Scrofa library (scag) Sus scrofa cDNA clone scag0004.c.03 5prim, mRNA sequence	0.361018	0.324272
GO:0006873	cellular ion homeostasis	AK236182.1		Sus scrofa mRNA, clone:OVRM10161E01, expressed in ovary	0.366334	4.95752
GO:0055082	cellular chemical homeostasis	AK236182.1		Sus scrofa mRNA, clone:OVRM10161E01, expressed in ovary	0.371934	4.87489
GO:0050801	ion homeostasis	AK236182.1		Sus scrofa mRNA, clone:OVRM10161E01, expressed in ovary	0.371934	4.87489
GO:0016310	phosphorylation	AK236182.1		Sus scrofa mRNA, clone:OVRM10161E01, expressed in ovary	0.374004	2.53241
GO:0016310	phosphorylation	AK236752.1		Sus scrofa mRNA, clone:OVRM10224E06, expressed in ovary	0.374004	2.53241
GO:0006913	nucleocytoplasmic transport	AY609457.1		Sus scrofa clone Clu_12124.scr.msk.p1.Contig3, mRNA sequence	0.38862	4.64275
GO:0007154	cell communication	CK454516		915002 MARC 4PIG Sus scrofa cDNA 5', mRNA sequence	0.389086	0.334661
GO:0051169	nuclear transport	AY609457.1		Sus scrofa clone Clu_12124.scr.msk.p1.Contig3, mRNA sequence	0.405138	4.43172
GO:0007600	sensory perception	BX665103		BX665103 Sus Scrofa library (scag) Sus scrofa cDNA clone scag0004.c.03 5prim, mRNA sequence	0.410607	4.36557
GO:0006753	nucleoside phosphate metabolic process	AK236182.1		Sus scrofa mRNA, clone:OVRM10161E01, expressed in ovary	0.443032	4.00676
GO:0009117	nucleotide metabolic process	AK236182.1		Sus scrofa mRNA, clone:OVRM10161E01, expressed in ovary	0.443032	4.00676
GO:0050896	response to stimulus	BX665103		BX665103 Sus Scrofa library (scag) Sus scrofa cDNA clone scag0004.c.03 5prim, mRNA sequence	0.450975	0.357572
GO:0007517	muscle development	CK454516		915002 MARC 4PIG Sus scrofa cDNA 5', mRNA sequence	0.464286	3.79862
GO:0044260	cellular macromolecule metabolic process	AK236324.1		Sus scrofa mRNA, clone:OVRM10181E04, expressed in ovary	0.464401	0.580728
GO:0044260	cellular macromolecule metabolic process	AK236587.1		Sus scrofa mRNA, clone:OVRM10206D03, expressed in ovary	0.464401	0.580728
GO:0044260	cellular macromolecule metabolic process	BX665103		BX665103 Sus Scrofa library (scag) Sus scrofa cDNA clone scag0004.c.03 5prim, mRNA sequence	0.464401	0.580728
GO:0048878	chemical homeostasis	AK236182.1		Sus scrofa mRNA, clone:OVRM10161E01, expressed in ovary	0.480037	3.65617
GO:0050890	cognition	BX665103		BX665103 Sus Scrofa library (scag) Sus scrofa cDNA clone scag0004.c.03 5prim, mRNA sequence	0.480037	3.65617
GO:0048523	negative regulation of cellular process	CK467896		939242 MARC 4PIG Sus scrofa cDNA 5', mRNA sequence	0.481197	1.76911
GO:0048523	negative regulation of cellular process	NM_001123205.1	TOB1	Sus scrofa transducer of ERBB2, 1 (TOB1), mRNA	0.481197	1.76911
GO:0048523	negative regulation of cellular process	NM_214356.1	RGS5	Sus scrofa regulator of G-protein signaling 5 (RGS5), mRNA	0.481197	1.76911
GO:0055086	nucleobase, nucleoside and nucleotide metabolic process	AK236182.1		Sus scrofa mRNA, clone:OVRM10161E01, expressed in ovary	0.485252	3.61103
GO:0006796	phosphate metabolic process	AK236182.1		Sus scrofa mRNA, clone:OVRM10161E01, expressed in ovary	0.49932	2.0818
GO:0006796	phosphate metabolic process	AK236752.1		Sus scrofa mRNA, clone:OVRM10224E06, expressed in ovary	0.49932	2.0818
GO:0006793	phosphorus metabolic process	AK236182.1		Sus scrofa mRNA, clone:OVRM10161E01, expressed in ovary	0.49932	2.0818
GO:0006793	phosphorus metabolic process	AK236752.1		Sus scrofa mRNA, clone:OVRM10224E06, expressed in ovary	0.49932	2.0818
GO:0016043	cellular component organization	EV867707		rpbfe0123_n8.y1 bfe Sus scrofa cDNA 5', mRNA sequence	0.500197	0.375956
GO:0006810	transport	AY609457.1		Sus scrofa clone Clu_12124.scr.msk.p1.Contig3, mRNA sequence	0.519708	1.45519
GO:0006810	transport	BP142174		BP142174 full-length enriched swine cDNA library, adult ovary Sus scrofa cDNA clone OVR010014C02 5', mRNA sequence	0.519708	1.45519
GO:0006810	transport	EW115068		reje08b_c22.y1 eje Sus scrofa cDNA 5', mRNA sequence	0.519708	1.45519
GO:0006810	transport	EW245573		rhlv30b_n22.y1 hlv Sus scrofa cDNA 5', mRNA sequence	0.519708	1.45519
GO:0006810	transport	NM_001044554.1	LOC733605	Sus scrofa NADH dehydrogenase 1 beta subcomplex 6 (LOC733605), mRNA	0.519708	1.45519
GO:0007610	behavior	BX665103		BX665103 Sus Scrofa library (scag) Sus scrofa cDNA clone scag0004.c.03 5prim, mRNA sequence	0.526342	3.28644
GO:0045892	negative regulation of transcription, DNA-dependent	CK467896		939242 MARC 4PIG Sus scrofa cDNA 5', mRNA sequence	0.526342	3.28644
GO:0048519	negative regulation of biological process	CK467896		939242 MARC 4PIG Sus scrofa cDNA 5', mRNA sequence	0.527091	1.68422
GO:0048519	negative regulation of biological process	NM_001123205.1	TOB1	Sus scrofa transducer of ERBB2, 1 (TOB1), mRNA	0.527091	1.68422
GO:0048519	negative regulation of biological process	NM_214356.1	RGS5	Sus scrofa regulator of G-protein signaling 5 (RGS5), mRNA	0.527091	1.68422
GO:0051253	negative regulation of RNA metabolic process	CK467896		939242 MARC 4PIG Sus scrofa cDNA 5', mRNA sequence	0.536442	3.21421
GO:0051234	establishment of localization	AY609457.1		Sus scrofa clone Clu_12124.scr.msk.p1.Contig3, mRNA sequence	0.536702	1.43661
GO:0051234	establishment of localization	BP142174		BP142174 full-length enriched swine cDNA library, adult ovary Sus scrofa cDNA clone OVR010014C02 5', mRNA sequence	0.536702	1.43661
GO:0051234	establishment of localization	EW115068		reje08b_c22.y1 eje Sus scrofa cDNA 5', mRNA sequence	0.536702	1.43661
GO:0051234	establishment of localization	EW245573		rhlv30b_n22.y1 hlv Sus scrofa cDNA 5', mRNA sequence	0.536702	1.43661
GO:0051234	establishment of localization	NM_001044554.1	LOC733605	Sus scrofa NADH dehydrogenase 1 beta subcomplex 6 (LOC733605), mRNA	0.536702	1.43661
GO:0065008	regulation of biological quality	AK236182.1		Sus scrofa mRNA, clone:OVRM10161E01, expressed in ovary	0.537348	1.97631
GO:0065008	regulation of biological quality	CK454516		915002 MARC 4PIG Sus scrofa cDNA 5', mRNA sequence	0.537348	1.97631
GO:0048731	system development	AK234858.1		Sus scrofa mRNA, clone:OVRM10024B02, expressed in ovary	0.545615	1.65251
GO:0048731	system development	CK454516		915002 MARC 4PIG Sus scrofa cDNA 5', mRNA sequence	0.545615	1.65251
GO:0048731	system development	EW088403		recc2833c_i12.y1 ecc Sus scrofa cDNA 5', mRNA sequence	0.545615	1.65251
GO:0007267	cell-cell signaling	CK454516		915002 MARC 4PIG Sus scrofa cDNA 5', mRNA sequence	0.546473	3.14509
GO:0006605	protein targeting	AY609457.1		Sus scrofa clone Clu_12124.scr.msk.p1.Contig3, mRNA sequence	0.546473	3.14509
GO:0045859	regulation of protein kinase activity	AY609457.1		Sus scrofa clone Clu_12124.scr.msk.p1.Contig3, mRNA sequence	0.546473	3.14509
GO:0044265	cellular macromolecule catabolic process	AK236324.1		Sus scrofa mRNA, clone:OVRM10181E04, expressed in ovary	0.555102	1.93065
GO:0044265	cellular macromolecule catabolic process	BX665103		BX665103 Sus Scrofa library (scag) Sus scrofa cDNA clone scag0004.c.03 5prim, mRNA sequence	0.555102	1.93065
GO:0043549	regulation of kinase activity	AY609457.1		Sus scrofa clone Clu_12124.scr.msk.p1.Contig3, mRNA sequence	0.566332	3.0154
GO:0051338	regulation of transferase activity	AY609457.1		Sus scrofa clone Clu_12124.scr.msk.p1.Contig3, mRNA sequence	0.566332	3.0154
GO:0051252	regulation of RNA metabolic process	CK467896		939242 MARC 4PIG Sus scrofa cDNA 5', mRNA sequence	0.575205	0.404555
GO:0008285	negative regulation of cell proliferation	NM_001123205.1	TOB1	Sus scrofa transducer of ERBB2, 1 (TOB1), mRNA	0.58105	2.92494
GO:0009057	macromolecule catabolic process	AK236324.1		Sus scrofa mRNA, clone:OVRM10181E04, expressed in ovary	0.58551	1.8571
GO:0009057	macromolecule catabolic process	BX665103		BX665103 Sus Scrofa library (scag) Sus scrofa cDNA clone scag0004.c.03 5prim, mRNA sequence	0.58551	1.8571
GO:0006139	nucleobase, nucleoside, nucleotide and nucleic acid metabolic process	AK236182.1		Sus scrofa mRNA, clone:OVRM10161E01, expressed in ovary	0.589794	0.410229
GO:0009790	embryonic development	BX665103		BX665103 Sus Scrofa library (scag) Sus scrofa cDNA clone scag0004.c.03 5prim, mRNA sequence	0.590779	2.86758
GO:0006355	regulation of transcription, DNA-dependent	CK467896		939242 MARC 4PIG Sus scrofa cDNA 5', mRNA sequence	0.592748	0.411383
GO:0034960	cellular biopolymer metabolic process	AK236587.1		Sus scrofa mRNA, clone:OVRM10206D03, expressed in ovary	0.595714	0.412544
GO:0006066	cellular alcohol metabolic process	AK236324.1		Sus scrofa mRNA, clone:OVRM10181E04, expressed in ovary	0.61004	2.75937
GO:0048513	organ development	CK454516		915002 MARC 4PIG Sus scrofa cDNA 5', mRNA sequence	0.666121	1.68584
GO:0048513	organ development	EW088403		recc2833c_i12.y1 ecc Sus scrofa cDNA 5', mRNA sequence	0.666121	1.68584
GO:0009887	organ morphogenesis	EW088403		recc2833c_i12.y1 ecc Sus scrofa cDNA 5', mRNA sequence	0.706978	2.3031
GO:0051179	localization	AY609457.1		Sus scrofa clone Clu_12124.scr.msk.p1.Contig3, mRNA sequence	0.70928	1.27615
GO:0051179	localization	BP142174		BP142174 full-length enriched swine cDNA library, adult ovary Sus scrofa cDNA clone OVR010014C02 5', mRNA sequence	0.70928	1.27615
GO:0051179	localization	EW115068		reje08b_c22.y1 eje Sus scrofa cDNA 5', mRNA sequence	0.70928	1.27615
GO:0051179	localization	EW245573		rhlv30b_n22.y1 hlv Sus scrofa cDNA 5', mRNA sequence	0.70928	1.27615
GO:0051179	localization	NM_001044554.1	LOC733605	Sus scrofa NADH dehydrogenase 1 beta subcomplex 6 (LOC733605), mRNA	0.70928	1.27615
GO:0008610	lipid biosynthetic process	AK236752.1		Sus scrofa mRNA, clone:OVRM10224E06, expressed in ovary	0.711424	2.28511
GO:0008283	cell proliferation	CK467896		939242 MARC 4PIG Sus scrofa cDNA 5', mRNA sequence	0.72027	2.24995
GO:0044248	cellular catabolic process	AK236324.1		Sus scrofa mRNA, clone:OVRM10181E04, expressed in ovary	0.720842	1.58533
GO:0044248	cellular catabolic process	BX665103		BX665103 Sus Scrofa library (scag) Sus scrofa cDNA clone scag0004.c.03 5prim, mRNA sequence	0.720842	1.58533
GO:0048856	anatomical structure development	AK234858.1		Sus scrofa mRNA, clone:OVRM10024B02, expressed in ovary	0.721704	1.40397
GO:0048856	anatomical structure development	CK454516		915002 MARC 4PIG Sus scrofa cDNA 5', mRNA sequence	0.721704	1.40397
GO:0048856	anatomical structure development	EW088403		recc2833c_i12.y1 ecc Sus scrofa cDNA 5', mRNA sequence	0.721704	1.40397
GO:0016481	negative regulation of transcription	CK467896		939242 MARC 4PIG Sus scrofa cDNA 5', mRNA sequence	0.750762	2.13499
GO:0043085	positive regulation of catalytic activity	AY609457.1		Sus scrofa clone Clu_12124.scr.msk.p1.Contig3, mRNA sequence	0.759342	2.10427
GO:0010629	negative regulation of gene expression	CK467896		939242 MARC 4PIG Sus scrofa cDNA 5', mRNA sequence	0.767864	2.07442
GO:0043170	macromolecule metabolic process	AK236324.1		Sus scrofa mRNA, clone:OVRM10181E04, expressed in ovary	0.767952	0.756775
GO:0043170	macromolecule metabolic process	AK236587.1		Sus scrofa mRNA, clone:OVRM10206D03, expressed in ovary	0.767952	0.756775
GO:0043170	macromolecule metabolic process	BX665103		BX665103 Sus Scrofa library (scag) Sus scrofa cDNA clone scag0004.c.03 5prim, mRNA sequence	0.767952	0.756775
GO:0043170	macromolecule metabolic process	CK454516		915002 MARC 4PIG Sus scrofa cDNA 5', mRNA sequence	0.767952	0.756775
GO:0051704	multi-organism process	BX665103		BX665103 Sus Scrofa library (scag) Sus scrofa cDNA clone scag0004.c.03 5prim, mRNA sequence	0.784734	2.0172
GO:0009056	catabolic process	AK236324.1		Sus scrofa mRNA, clone:OVRM10181E04, expressed in ovary	0.803761	1.45158
GO:0009056	catabolic process	BX665103		BX665103 Sus Scrofa library (scag) Sus scrofa cDNA clone scag0004.c.03 5prim, mRNA sequence	0.803761	1.45158
GO:0045934	negative regulation of nucleobase, nucleoside, nucleotide and nucleic acid metabolic process	CK467896		939242 MARC 4PIG Sus scrofa cDNA 5', mRNA sequence	0.809612	1.93704
GO:0006915	apoptosis	AK236182.1		Sus scrofa mRNA, clone:OVRM10161E01, expressed in ovary	0.821862	1.89931
GO:0010558	negative regulation of macromolecule biosynthetic process	CK467896		939242 MARC 4PIG Sus scrofa cDNA 5', mRNA sequence	0.833988	1.86302
GO:0012501	programmed cell death	AK236182.1		Sus scrofa mRNA, clone:OVRM10161E01, expressed in ovary	0.833988	1.86302
GO:0031327	negative regulation of cellular biosynthetic process	CK467896		939242 MARC 4PIG Sus scrofa cDNA 5', mRNA sequence	0.84599	1.82808
GO:0009890	negative regulation of biosynthetic process	CK467896		939242 MARC 4PIG Sus scrofa cDNA 5', mRNA sequence	0.853924	1.80552
GO:0009966	regulation of signal transduction	NM_214356.1	RGS5	Sus scrofa regulator of G-protein signaling 5 (RGS5), mRNA	0.877404	1.74103
GO:0008219	cell death	AK236182.1		Sus scrofa mRNA, clone:OVRM10161E01, expressed in ovary	0.888965	1.71049
GO:0016265	death	AK236182.1		Sus scrofa mRNA, clone:OVRM10161E01, expressed in ovary	0.888965	1.71049
GO:0006886	intracellular protein transport	AY609457.1		Sus scrofa clone Clu_12124.scr.msk.p1.Contig3, mRNA sequence	0.904197	1.67139
GO:0010646	regulation of cell communication	NM_214356.1	RGS5	Sus scrofa regulator of G-protein signaling 5 (RGS5), mRNA	0.959505	1.53944
GO:0010605	negative regulation of macromolecule metabolic process	CK467896		939242 MARC 4PIG Sus scrofa cDNA 5', mRNA sequence	0.994836	1.46247
GO:0006357	regulation of transcription from RNA polymerase II promoter	CK467896		939242 MARC 4PIG Sus scrofa cDNA 5', mRNA sequence	0.994836	1.46247
GO:0009653	anatomical structure morphogenesis	EW088403		recc2833c_i12.y1 ecc Sus scrofa cDNA 5', mRNA sequence	1	1.02991
GO:0022610	biological adhesion	BI185477		UNL-P-FN-cw-b-12-0-UNL.s1 UNL-P-FN Sus scrofa cDNA clone UNL-P-FN-cw-b-12-0-UNL 3', mRNA sequence	1	1.21872
GO:0043284	biopolymer biosynthetic process	AK236587.1		Sus scrofa mRNA, clone:OVRM10206D03, expressed in ovary	1	0.991503
GO:0043285	biopolymer catabolic process	BX665103		BX665103 Sus Scrofa library (scag) Sus scrofa cDNA clone scag0004.c.03 5prim, mRNA sequence	1	0.978239
GO:0009058	biosynthetic process	AK236587.1		Sus scrofa mRNA, clone:OVRM10206D03, expressed in ovary	1	0.989826
GO:0009058	biosynthetic process	AK236752.1		Sus scrofa mRNA, clone:OVRM10224E06, expressed in ovary	1	0.989826
GO:0007155	cell adhesion	BI185477		UNL-P-FN-cw-b-12-0-UNL.s1 UNL-P-FN Sus scrofa cDNA clone UNL-P-FN-cw-b-12-0-UNL 3', mRNA sequence	1	1.21872
GO:0034961	cellular biopolymer biosynthetic process	AK236587.1		Sus scrofa mRNA, clone:OVRM10206D03, expressed in ovary	1	0.991503
GO:0044249	cellular biosynthetic process	AK236587.1		Sus scrofa mRNA, clone:OVRM10206D03, expressed in ovary	1	1.00686
GO:0044249	cellular biosynthetic process	AK236752.1		Sus scrofa mRNA, clone:OVRM10224E06, expressed in ovary	1	1.00686
GO:0051641	cellular localization	AY609457.1		Sus scrofa clone Clu_12124.scr.msk.p1.Contig3, mRNA sequence	1	0.801352
GO:0034645	cellular macromolecule biosynthetic process	AK236587.1		Sus scrofa mRNA, clone:OVRM10206D03, expressed in ovary	1	0.812482
GO:0044257	cellular protein catabolic process	BX665103		BX665103 Sus Scrofa library (scag) Sus scrofa cDNA clone scag0004.c.03 5prim, mRNA sequence	1	1.18418
GO:0051649	establishment of localization in cell	AY609457.1		Sus scrofa clone Clu_12124.scr.msk.p1.Contig3, mRNA sequence	1	0.850272
GO:0045184	establishment of protein localization	AY609457.1		Sus scrofa clone Clu_12124.scr.msk.p1.Contig3, mRNA sequence	1	0.981522
GO:0046907	intracellular transport	AY609457.1		Sus scrofa clone Clu_12124.scr.msk.p1.Contig3, mRNA sequence	1	0.952748
GO:0009059	macromolecule biosynthetic process	AK236587.1		Sus scrofa mRNA, clone:OVRM10206D03, expressed in ovary	1	0.807993
GO:0033036	macromolecule localization	AY609457.1		Sus scrofa clone Clu_12124.scr.msk.p1.Contig3, mRNA sequence	1	0.810231
GO:0043632	modification-dependent macromolecule catabolic process	BX665103		BX665103 Sus Scrofa library (scag) Sus scrofa cDNA clone scag0004.c.03 5prim, mRNA sequence	1	1.18418
GO:0019941	modification-dependent protein catabolic process	BX665103		BX665103 Sus Scrofa library (scag) Sus scrofa cDNA clone scag0004.c.03 5prim, mRNA sequence	1	1.18418
GO:0031324	negative regulation of cellular metabolic process	CK467896		939242 MARC 4PIG Sus scrofa cDNA 5', mRNA sequence	1	1.43379
GO:0009892	negative regulation of metabolic process	CK467896		939242 MARC 4PIG Sus scrofa cDNA 5', mRNA sequence	1	1.39283
GO:0007399	nervous system development	AK234858.1		Sus scrofa mRNA, clone:OVRM10024B02, expressed in ovary	1	1.17467
GO:0006996	organelle organization	EV867707		rpbfe0123_n8.y1 bfe Sus scrofa cDNA 5', mRNA sequence	1	0.755797
GO:0044238	primary metabolic process	AK236182.1		Sus scrofa mRNA, clone:OVRM10161E01, expressed in ovary	1	1.02424
GO:0044238	primary metabolic process	AK236324.1		Sus scrofa mRNA, clone:OVRM10181E04, expressed in ovary	1	1.02424
GO:0044238	primary metabolic process	AK236587.1		Sus scrofa mRNA, clone:OVRM10206D03, expressed in ovary	1	1.02424
GO:0044238	primary metabolic process	AK236752.1		Sus scrofa mRNA, clone:OVRM10224E06, expressed in ovary	1	1.02424
GO:0044238	primary metabolic process	AK239646.1		Sus scrofa mRNA, clone:THY010118H06, expressed in thymus	1	1.02424
GO:0044238	primary metabolic process	BX665103		BX665103 Sus Scrofa library (scag) Sus scrofa cDNA clone scag0004.c.03 5prim, mRNA sequence	1	1.02424
GO:0044238	primary metabolic process	XM_001927243.1	LOC100152491	PREDICTED: Sus scrofa similar to Lysophospholipase I (LOC100152491), partial mRNA	1	1.02424
GO:0030163	protein catabolic process	BX665103		BX665103 Sus Scrofa library (scag) Sus scrofa cDNA clone scag0004.c.03 5prim, mRNA sequence	1	1.1337
GO:0008104	protein localization	AY609457.1		Sus scrofa clone Clu_12124.scr.msk.p1.Contig3, mRNA sequence	1	0.865365
GO:0015031	protein transport	AY609457.1		Sus scrofa clone Clu_12124.scr.msk.p1.Contig3, mRNA sequence	1	0.988154
GO:0006508	proteolysis	BX665103		BX665103 Sus Scrofa library (scag) Sus scrofa cDNA clone scag0004.c.03 5prim, mRNA sequence	1	0.865365
GO:0051603	proteolysis involved in cellular protein catabolic process	BX665103		BX665103 Sus Scrofa library (scag) Sus scrofa cDNA clone scag0004.c.03 5prim, mRNA sequence	1	1.18418
GO:0009889	regulation of biosynthetic process	AK237234.1		Sus scrofa mRNA, clone:SPL010015B04, expressed in spleen	1	0.958995
GO:0009889	regulation of biosynthetic process	CK454516		915002 MARC 4PIG Sus scrofa cDNA 5', mRNA sequence	1	0.958995
GO:0009889	regulation of biosynthetic process	CK467896		939242 MARC 4PIG Sus scrofa cDNA 5', mRNA sequence	1	0.958995
GO:0050790	regulation of catalytic activity	AY609457.1		Sus scrofa clone Clu_12124.scr.msk.p1.Contig3, mRNA sequence	1	1.37321
GO:0042127	regulation of cell proliferation	NM_001123205.1	TOB1	Sus scrofa transducer of ERBB2, 1 (TOB1), mRNA	1	1.43379
GO:0031326	regulation of cellular biosynthetic process	AK237234.1		Sus scrofa mRNA, clone:SPL010015B04, expressed in spleen	1	0.958995
GO:0031326	regulation of cellular biosynthetic process	CK454516		915002 MARC 4PIG Sus scrofa cDNA 5', mRNA sequence	1	0.958995
GO:0031326	regulation of cellular biosynthetic process	CK467896		939242 MARC 4PIG Sus scrofa cDNA 5', mRNA sequence	1	0.958995
GO:0031323	regulation of cellular metabolic process	AK237234.1		Sus scrofa mRNA, clone:SPL010015B04, expressed in spleen	1	0.870516
GO:0031323	regulation of cellular metabolic process	CK454516		915002 MARC 4PIG Sus scrofa cDNA 5', mRNA sequence	1	0.870516
GO:0031323	regulation of cellular metabolic process	CK467896		939242 MARC 4PIG Sus scrofa cDNA 5', mRNA sequence	1	0.870516
GO:0010468	regulation of gene expression	AK237234.1		Sus scrofa mRNA, clone:SPL010015B04, expressed in spleen	1	0.979331
GO:0010468	regulation of gene expression	CK454516		915002 MARC 4PIG Sus scrofa cDNA 5', mRNA sequence	1	0.979331
GO:0010468	regulation of gene expression	CK467896		939242 MARC 4PIG Sus scrofa cDNA 5', mRNA sequence	1	0.979331
GO:0010556	regulation of macromolecule biosynthetic process	AK237234.1		Sus scrofa mRNA, clone:SPL010015B04, expressed in spleen	1	0.966388
GO:0010556	regulation of macromolecule biosynthetic process	CK454516		915002 MARC 4PIG Sus scrofa cDNA 5', mRNA sequence	1	0.966388
GO:0010556	regulation of macromolecule biosynthetic process	CK467896		939242 MARC 4PIG Sus scrofa cDNA 5', mRNA sequence	1	0.966388
GO:0060255	regulation of macromolecule metabolic process	AK237234.1		Sus scrofa mRNA, clone:SPL010015B04, expressed in spleen	1	0.883666
GO:0060255	regulation of macromolecule metabolic process	CK454516		915002 MARC 4PIG Sus scrofa cDNA 5', mRNA sequence	1	0.883666
GO:0060255	regulation of macromolecule metabolic process	CK467896		939242 MARC 4PIG Sus scrofa cDNA 5', mRNA sequence	1	0.883666
GO:0019222	regulation of metabolic process	AK237234.1		Sus scrofa mRNA, clone:SPL010015B04, expressed in spleen	1	0.864513
GO:0019222	regulation of metabolic process	CK454516		915002 MARC 4PIG Sus scrofa cDNA 5', mRNA sequence	1	0.864513
GO:0019222	regulation of metabolic process	CK467896		939242 MARC 4PIG Sus scrofa cDNA 5', mRNA sequence	1	0.864513
GO:0065009	regulation of molecular function	AY609457.1		Sus scrofa clone Clu_12124.scr.msk.p1.Contig3, mRNA sequence	1	1.20865
GO:0019219	regulation of nucleobase, nucleoside, nucleotide and nucleic acid metabolic process	AK237234.1		Sus scrofa mRNA, clone:SPL010015B04, expressed in spleen	1	1.03844
GO:0019219	regulation of nucleobase, nucleoside, nucleotide and nucleic acid metabolic process	CK454516		915002 MARC 4PIG Sus scrofa cDNA 5', mRNA sequence	1	1.03844
GO:0019219	regulation of nucleobase, nucleoside, nucleotide and nucleic acid metabolic process	CK467896		939242 MARC 4PIG Sus scrofa cDNA 5', mRNA sequence	1	1.03844
GO:0045449	regulation of transcription	AK237234.1		Sus scrofa mRNA, clone:SPL010015B04, expressed in spleen	1	1.08197
GO:0045449	regulation of transcription	CK454516		915002 MARC 4PIG Sus scrofa cDNA 5', mRNA sequence	1	1.08197
GO:0045449	regulation of transcription	CK467896		939242 MARC 4PIG Sus scrofa cDNA 5', mRNA sequence	1	1.08197
GO:0006511	ubiquitin-dependent protein catabolic process	BX665103		BX665103 Sus Scrofa library (scag) Sus scrofa cDNA clone scag0004.c.03 5prim, mRNA sequence	1	1.18418

## Sheet: Landrace-profile 76(dpc)
GO_id	GO_name	genebank	Gene symbol	Gene Description	Pvalue	Enrichment
GO:0006654	phosphatidic acid biosynthetic process	NM_001130534.1	AGPAT2	Sus scrofa 1-acylglycerol-3-phosphate O-acyltransferase 2 (AGPAT2), mRNA	0.00674896	296.342
[truncated: 252 more rows]

## Sheet: Landrace-profile 77(dpc)
GO_id	GO_name	genebank	Gene symbol	Gene Description	Pvalue	Enrichment
[truncated: 80 more rows]

## Sheet: Landrace-profile 80(dpc)
GO_id	GO_name	genebank	Gene symbol	Gene Description	Pvalue	Enrichment
[truncated: 21 more rows]

## Sheet: Landrace-profile 30(dpn)
GO_id	GO_name	genebank	Gene symbol	Gene Description	Pvalue	Enrichment
[truncated: 612 more rows]

[truncated: 5 more sheets: Landrace-profile 32(dpn), Landrace-profile 39(dpn), Landrace-profile 64(10 stages), Landrace-profile 71(10 stages), Landrace-profile 79(10 stages)]
