# Supplementary material for: Comparative Analyses by Sequencing of Transcriptomes during Skeletal Muscle Development between Pig Breeds Differing in Muscle Growth Rate and Fatness
Source: PLoS One. 2011 May 26;6(5):e19774. doi: 10.1371/journal.pone.0019774 (PMC3102668; doi:10.1371/journal.pone.0019774)
Supplement: Table S6 — Distribution analysis of muscle developmental genes. (XLS) [file pone.0019774.s018.xls]

## Sheet: Table S6.1
Supplemental table 6.1 The distributions of 595 genes probably related to muscle development.
LR2/LR1		LR3/LR2		LR4/LR3		LR5/LR4		LR6/LR5		LR7/LR6		LR8/LR7		LR9/LR8		LR10/LR9		LT2/LT1		LT3/LT2		LT4/LT3		LT5/LT4		LT6/LT5		LT7/LT6		LT8/LT7		LT9/LT8		LT10/LT9		LR/LT prenatal		LR/LT postnatal		LR/LT whole peiods
down	up	down	up	down	up	down	up	down	up	down	up	down	up	down	up	down	up	down	up	down	up	down	up	down	up	down	up	down	up	down	up	down	up	down	up	down	up	down	up	down	up
111	109	29	58	30	36	28	35	112	108	94	55	78	51	122	56	41	44	47	100	40	68	33	35	24	44	178	93	128	71	68	66	40	57	39	51	111	58	6	2	26	5
ABCG2	ACTN2	APH1A	ACTN2	CA3	ACTN2	RP6-213H19.1	CAV1	PICALM	ABRA	RP6-213H19.1	AMPD1	PICALM	ABRA	PICALM	ABRA	ABRA	PICALM	APP	RP6-213H19.1	STAT3	RP6-213H19.1	CA3	STAT3	RP6-213H19.1	AMPD1	PYGM	ABRA	STAT3	AMPD1	ABRA	AMPD1	APP	AMPD1	AMPD1	STAT3	ADAMTS20	IGFBP6	CASQ2	MYBPH	CACNA2D1	DB805600
ACTN1	AIFM1	CRKL	AMPD1	ANKRD1	AMPD1	DSTN	CAV2	RP6-213H19.1	ADAMTS20	STAT3	ATF4	ANGPTL4	AMPD1	APP	ARPC1B	AMPD1	ARPC1B	BMP4	ADAMTS20	APP	AMPD1	FABP3	CACNG1	CA3	CASQ2	CAV1	ANGPTL4	ARAF	ARPC1B	ANGPTL4	APP	CACNA2D1	ATF4	CACNG1	ANKRD1	APP	MICAL1	CYP27A1	CUGBP2	CYP27A1	EW055180
ACVR1	AMPD1	FABP3	ANKRD1	FABP3	BAG3	HSP90AB1	CDH5	ABCG2	ANGPTL4	ADAMTS20	CA3	CAV1	ARPC1B	ATF4	BTG2	ARAF	CAV2	CXCL12	AMPD1	ATF4	CA3	FHL1	CAV1	IGF2	CAV1	DLK1	ARAF	ATF4	CA3	ARPC1B	ATF4	CAV1	CA3	EGF	CAV1	ATF4	SHISA5	DAG1		IGFBP3	EW168087
ADAMTS20	ARPC1B	GNB2L1	ARPC3	FHL1	CACNG1	IGFBP6	CKM	APP	ATF4	CACNA2D1	CAMK2G	CAV2	ATF4	CACNA2D1	CA3	BTG2	CKM	ID2	ARPC1B	FBN2	CAV1	GNB2L1	CD34	IGFBP2	CAV2	CNN2	ATF4	CACNG1	CAV1	ENO3	CA3	CAV2	ENO3	ENO3	CDH5	BMPR2	ARHGEF11	SLC31A2		PPM1A	CUGBP2
ADRBK1	BAG1	HSP90AB1	ATF4	GNB2L1	CASQ1	LIMA1	ENO3	ARPC1B	ANKRD1	CAMK2D	CAV1	COL6A1	BTG2	CAMK2G	COL6A1	CA3	FABP3	IGFBP2	ATF4	LIMA1	CAV2	HSP90B1	CDH5	THBS3	ENO3	CLTC	CACNG1	CAMK2D	CAV2	FABP3	CACNA2D1	CDH5	TUBA4A	GNB2L1	CKM	CACNA2D1	MTMR14	DT322875		CCPG1	SPARC
AES	BAG3	HSP90B1	CA3	IGFBP2	CDH5	CDKN1A	FHL1	BMPR1B	CFL2	ANKRD1	CKM	ENO3	CA3	ANKRD1	COX7C	CACNG1	GNB2L1	MDFI	ATP1B4	ACVR1	CKM	HSP90AB1	CKM	STMN1	FGL2	CDC42EP2	ANKRD1	ANKRD1	CDH5	FHL1	CAMK2D	CKM	CDKN1A	GYS1	FHL1	CALCRL	EIF2B5	PTK2		FZD6	EIF2B5
AKIRIN2	CA3	IGFBP2	CDKN1A	THBS3	CKM	NCSTN	GHR	CA3	CKM	CASQ2	ENO3	FABP3	CAMK2D	CAV1	EGF	CAMK2D	HSP90B1	CSRP2	CA3	MYF5	EGF	IGF2	EGF	MMP14	GYS1	KLF6	CFL2	CASQ2	CKM	GADD45A	CAV1	FOS	CALM1	TTN	FOS	CASQ2	TCF7L2			NFKB1
APP	CACNG1	PRDX6	CFL2	STMN1	DES	TTN	GNB2L1	CAV1	CNN1	CFL2	FOS	FHL1	ANKRD1	CAV2	ENO3	ANKRD1	HSP90AB1	CALM1	CACNA2D1	ITGA5	ENO3	IGFBP2	ENO3	MMP2	TUBA4A	GPC3	CKM	CFL2	EGF	GNB2L1	CFL2	GNB2L1	EP300	CASQ1	GADD45A	CLTC	TPM2			PPP3CA
ARPC3	CAV1	PTN	CKM	MYOZ2	EGF	COPZ1	HSP90B1	CD34	COX7C	CNN1	CALM1	FOXO1	CFL2	CKM	FOS	CFL2	IGF2	ARPC3	CASQ2	THBS3	FABP3	ITGB1	GYS1	SPARC	DHRS7	PAPSS1	ENO3	COL6A1	ENO3	HSP90B1	CKM	HSP90B1	TTN	WWP1	HSP90AB1	CXCL12	TPM3			ING4
ATF4	CAV2	STMN1	DES	MGP	ENO3	ACTN2	IGF2	CDH5	ENO3	DSTN	EP300	GHR	CKM	CXCL12	GNB2L1	CNN1	TTN	HDAC2	CAV1	MYH7B	FGL2	APH1A	THBS3	TNMD	TTN	SLC31A2	FABP3	DSTN	FABP3	IGFBP6	EGF	IGFBP6	CASQ1	CCNG1	DHRS7	DLK1	TPRKB			PPHLN1
ATP1A2	CDH5	TGFB3	EGF	MMP2	MEF2C	STMN1	CASQ1	COL6A1	FABP3	FABP3	TTN	GNB2L1	CNN1	FHL1	HSPA6	EGF	CASQ1	COPZ1	CFL2	MESDC2	FHL1	HDAC2	CASQ1	MORF4L2	CASQ1	CREBZF	FHL1	FHL1	FOS	DHRS7	GYS1	ITGB1	WWP1	MYOZ3	BAG3	FHL1	BCL2L15			BM194685
BMP4	CDKN1A	TNNT1	ENO3	MYH7	MYL1	MEF2C	MGP	CXCL12	FHL1	FGL2	WWP1	HSP90B1	EGF	GADD45A	IGFBP6	ENO3	DES	MTMR7	CKM	CCNG1	GNB2L1	TTN	ACTN2	PTN	ACTN2	AES	GADD45A	FOXO1	GNB2L1	GADD45G	PPM1A	COX6A1P2	ACTN2	MAPK12	DES	GUCY1B3	FLNB			BX924862
CALM1	CKM	IGF2	FEZ2	TNMD	MYLPF	MMP2	MYH7	EGF	GADD45A	FHL1	MTMR14	HSP90AB1	GYS1	GYS1	JAK1	FOS	MYOZ2	MTMR14	DLK1	MEST	HSP90AB1	STMN1	DES	THY1	DES	PICALM	GNB2L1	GADD45A	TTN	RAP1A	CALM1	MGP	MUSTN1	MYBPH	MYOZ2	HMOX1	LSM6			DN100926
CDC42EP4	COL5A3	CJ024171	FGL2	TNNT1	MYOZ1	MYBPH	MYLPF	GNB2L1	HSP90AB1	GADD45A	PPP3CC	JAK1	SRF	HRAS	TUBA4A	JAK1	MYOZ3	MAP1A	ENO3	MMP14	TTN	MYOZ2	MMP14	DV897892	MYOZ3	RP6-213H19.1	HSPA6	GYS1	CASQ1	FERMT2	CASQ1	MMP2	PPP3CC	MYL1	MB	ID2	MEN1			DN105634
CLPTM1L	COL6A1	BX923548	FHL1	TPM3	MYOZ3	QDPR	PPP1R12A	HSP90B1	TUBA4A	GYS1	DES	GADD45G	CASQ1	HSP90AB1	CRELD1	WWP1	MEF2C	ATP1A2	FGL2	MMP2	DES	MYLPF	MMP2	CJ024171	MAPK12	FEZ2	IGFBP6	HSPA6	WWP1	ARPC3	DCUN1D1	MYL1	DES	MYLPF	MYF6	INSR	PDCD2			DN105652
CLTC	CRKL	BM190542	FLNC	MAP1LC3A	RAMP1	SMPX	SAR1B	IGF2	DHRS7	HSP90B1	CCNG1	NPR1	BAG3	ITGB1	MUSTN1	ACTN2	MGP	STMN1	FHL1	QDPR	MYOZ3	MYOG	MYL1	EV986754	MYH2	CENPF	JAK1	HSP90AB1	STMN1	TTN	WWP1	MYLPF	CCNG1	MYOZ1	MYH2	ITGB1	TBCB			DT320681
CNN2	DAG1	CT863733	FOS	MORF4L2	RP6-213H19.1	FLNC	SLC2A4	IGFBP2	GADD45G	HSP90AB1	MYOZ3	FERMT2	WWP1	SENP2	DES	MUSTN1	MYH7	PPP2CA	HSP90B1	SPARC	MEF2C	PPP1CB	MYOZ1	EW137538	MYH7	ING4	TUBA4A	IGFBP6	CCNG1	ARHGEF11	MTMR14	SPARC	MYOZ2	NRAP	MYH7	KLF6	BX918412			DT320734
COX6A1P2	DES	EW055180	GYS1	PTN	RYR1	GOLGB1	TPM2	IGFBP6	RAP1A	IGFBP6	MAPK12	EP300	MUSTN1	COX6A1P2	MYOZ2	CCNG1	MYLPF	PPP2R1A	ITGB1	TNMD	MYH7	PPP2CA	NRAP	DV904076	MYL1	ACTN1	GADD45G	IKBKG	MYOZ3	ACTN2	ATP1A2	EPAS1	MAPK12	PYGM	POPDC3	RPS6KA5	DN118117			DT321883
CXCL12	DSTN	DT324339	MAP1A	PURA	SLC2A4	THY1	NDUFS1	LAMB1	MYO18B	TUBA4A	MB	TTN	CCNG1	RAP1A	MMP2	MYOZ1	PPP2CA	PTEN	TUBA4A	TNNT1	MYL1	TNNT1	SFRP4	CN163858	MYLPF	CXCL12	ARPC5L	JAK1	MB	MUSTN1	CCNG1	MLF1	MB	RYR1	SMPX	MYLK	BQ602411			DT335508
EDNRA	ENO3	EW137538	MEF2C	CK454645	SMPX	CK452102	NDUFS4	ACVR1	CALM1	CDKN1A	MYL1	DCUN1D1	MYOZ3	BMPR1A	MYOZ1	PPP1CB	RYR1	ACTN1	CDKN1A	VCAM1	MYLPF	FLNC	SPARC	CK454645	MYOZ1	THY1	DCUN1D1	TUBA4A	MGP	DES	MYOZ3	THY1	MYBPH	TNNI2	SOD2	COX6A1P2	DN123732			DY418386
FBN2	FABP3	DV897892	MMP2	BX923548	SPARC	DN123606	SGCD	FGD1	TTN	DHRS7	MYOZ1	ACTN2	MEF2C	PPM1A	RYR1	SMPX	SAR1B	AES	MYF5	ACTN1	MYOG	GOLGB1	TNNI2	DN112655	NRAP	GOLGB1	BAG3	CDKN1A	MYH7	MYOZ2	MYL1	IGF2	MYH2	TNNT3	SPARC	PLCB4	BX915041			DY419948
FGD1	FGL2	DT323520	MYF6	CJ024171	TNNI2	DR082404	BX665103	MYF5	CASQ1	RAP1A	POPDC3	MTMR14	MYBPH	CALM1	SMYD2	SOD2	TNNT1	CNN2	THBS3	AES	MYOZ1	BX923548	TNNT3	EH008219	PLN	FGL2	ACTN2	COX6A1P2	MYL1	MB	MYLPF	PPP1R12A	MYH7	TPRKB	TEAD4	NOTCH2	EW137996			EW309452
GAP43	FHL1	BP143486	MYH7	DR082404	TNNT3	DV904076	BX923548	MICAL1	DCUN1D1	BMPR1A	RAMP1	DES	MYF6	FERMT2	CD74	TNNT3	AIFM1	GAP43	MYH7B	CNN2	NRAP	DR082404	HOXA10	SPARC	PYGM	FBN2	MUSTN1	DHRS7	MYLPF	MGP	MYOZ1	BP160020	MYOZ1	MAP1LC3A	TNNT1	BMPR1A	DN120593			ICAM1
GNAS	FLNC	HSF2	MYL1	DV897892	TPM2	DB805600	DV896376	E2F1	ACTN2	ARPC3	RYR1	ATP1A2	MYL1	MTMR15	FLNC	TPM2	CD74	MAP1LC3A	TTN	PAPSS1	PPP2CA	DV897892	THY1	NOV	RYR1	MEF2C	PPP3CC	GADD45G	MYOZ1	MYH7	PPP3CA	BW979212	NRAP	MYOM1	TPM2	DCUN1D1	EV993023			PDLIM5
GPC3	GNB2L1	FOXK2	MYLPF	DV904076	TTN	EV986754	DV897892	EP300	MUSTN1	SRF	SMYD2	NCOR2	MYLPF	SRF	HSPB7	FLNC	CDC42EP2	PTN	CASQ1	PDCD5	RAMP1	DV904076	COL1A2		NOTCH4	ADAMTS20	DES	PPM1A	PYGM	PLN	PYGM	BX665103	PPP1CB	BX922054	TPM3	CCPG1	BX923538			SPARC
HDAC2	HSP90AB1	FABP3	MYOZ1	EW137538	POPDC3	EW137538	DV901297	MTMR14	PPP3CC	CASQ1	TNNT1	MYOZ2	PRDX6	TTN	LSM6	GRSF1	CRKL	TBCB	ACTN2	TGIF1	RYR1	EW137538	MAPK12		SLC2A4	MEF2A	ATP1A2	CALM1	RAMP1	PPP1CB	RAMP1	CN163858	RYR1	DR082404	AES	FZD6	BX924637
HMOX1	HSPB7	SERPINE2	MYOZ2	EW236736	BX922054	BM190702	DT324339	MAP1A	ATP1A2	BAG3	TNNT3	MB	SMPX	CASQ1	MAFG	MYOM1	DAG1	BX670766	MESDC2	THY1	SMPX	EW236736	BX926893		TNNI2	TNMD	CCNG1	ARPC5L	RYR1	RYR1	SMAD4	DB788903	SLC2A4	DV896376	FLNC	ITGA6	EW222667
ID2	LAMB1	AK1	NRAP	SPARC	BX926893	HSPB2	EV867707	STMN1	CCNG1	ACTN2	TPM2	MGP	TNNI2	DCUN1D1	MAP4	NDUFS4	IFRD1	CJ024171	DES	COL1A2	TNNT3	BM190542	DN100926		TNNT3	SIRT1	MYOZ2	ITGA5	SAR1B	SMPX	SPARC	DT321969	SMPX	DT320474	HSPB7	MAP3K7	DT320856
IGFBP2	MAP1LC3A	SLN	PURA	FABP3	DN123606		EW088403	MEF2C	LOC733612	MESDC2	CD74	MYH7	TNNT3	BAG3	MLLT3	PDCD5	MAP1LC3A	DN120593	CCNG1	LOC733612	TPM2	EH008219	CJ024171		FEZ2	MYL1	MYBPH	THBS3	TNNT1	TNNT1	TNNI2	DT322380	TNNI2	BM190702	MORF4L2	MAPK8	BX672955
ING2	MAP4		RAMP1	NOV	DV896376		EW168087	MMP14	NCOR2	MUSTN1	ING2	MYOZ1	TPM2	MTMR14	MYOM1	LOC733612	NDRG2	DT331358	MYOZ2	CJ024171	AKIRIN2	CN163858	DT327799		HSPB7	LAMB1	MYH7	EIF2B1	TNNT3	TPM2	AKIRIN2	DT324183	TNNT1	CN163858	NDUFS1	MEF2A	AK239584.1
ING4	MEF2C		RP6-213H19.1		DB784140		BM190542	MMP2	MYOZ2	TP53	MAP1LC3A	GNAS	FLNC	PPP3CC	PDCD5	POPDC3	NDUFS1	AJ953775	MEF2C	EV986754	CREBZF	DT321969	EW382931		NAPA	MYH3	NRAP	COPZ1	TPM2	TPM3	ING4	DT329656	TNNT3	DN134248	THY1	MSN	EW168087
IRF1	MEF2D		SFRP4		DT327799		CD36	MSTN	MYOZ3	ATP1A2	MLF1	PPP2CA	MORF4L2	ATP1A2	VDAC1	BX923538	USF2	DT327101	MEST	EW236736	FEZ2	FABP3	DB784140		BX926893	MAP3K7	PPP1CB	BAG3	AIFM1	UCP3	THY1	DT331358	TPM2	CB477123	TNFRSF12A	MSTN	EW036194
ITGA5	MICAL1		SMPX		HSPA1A		SLC25A4	POPDC3	MAPK12	MYOZ2	SGCD	RYR1	MYOM1	CCNG1	BX672955	BM190702	DN128580	AJ945191	MYL2	DT322380	FLNC	CD36	DT331413		DT320474	LIMA1	PRDX6	ACTN2	CD74	AES	BP160020	DV897892	TPM3	CK452102	DV904076	MYH3	BX925993
ITGB1	MLLT3		SPARC		SLC25A4		SLN	RHOB	MB	MAPRE1	VDAC1	SAR1B	THY1	MYOZ3	BX673343	BW965256	DR082404	BM190633	MMP2	EW101413	GOLGB1		SPARC		DB784140	TYK2	SERPINE1	MTMR14	MLF1	CD74	CN163858	EW088403	TPRKB	NFATC3	DY405541	MYL1	BM190522
MAP1A	MYBPH		SRF		APOBEC2		SPARC	SFRP4	MGP	MEF2C	CB477123	SLC2A4	TNFRSF12A	MB	DN128469	BX672955	DV900662	AJ956714	MSTN	EV983935	MEF2D		SLC25A4		DT327646	AMPD1	SLC2A4	PPIL2	MYOM1	HSPB7	DB814005	FOS	FLNC	GPD1	DT333190	MYOD1	BX918914
MAP1LC3B	MYH7		STAT3		SLN			SIRT1	MYL2	MGP	BX922054	TNNT1	BM083163	MEF2C	DR082404	APOBEC2	DV904076	BX915041	MYH2	GTF2I	MLF1				DV901297	CAV2	SOD2	MUSTN1	NDRG2	LSM6	DB788903	BTG3	HSPB7	SLC25A4	EV986754	NFKB1	CK454137
MEF2A	MYLPF		TEAD4					SMAD1	MYBPH	MYL2	CN163858	TPM3	BM190702	MGP	DV904076	CYR61	CT863733	BI186417	MYH7	KIAA0101	SLC31A2				DQ000205	SFRP4	THBS1	DES	NDUFS1	MAP1LC3A	DT320474	CYR61	MYOM1	AK1	EW137538	GNAS	DB805600
MEST	MYOG		THBS3					SPARC	MYH2	MYBPH	DR082404	UCP3	BP160020	MYBPH	DB814005	FOS	DT321969	EW421594	MYH3	PRMT5	VDAC1				DT327799	MEST	TNNT1	TP53	SGCD	MAP4	DT327799	CASK	PDCD5	SLN	EW168087	PPP3CA	DV896376
MORF4L2	MYOM1		TNNI2					TCF7L2	MYH7	MYH2	DT320257	AES	BX922054	MYF6	BM083163	HSPA1A	BP160020	MAPK3	MYL1	NOV	IGF2				BW965256	TUBE1	TNNT3	ATP1A2	USF2	MLF1	EW309452	SPARC	BM190355		EW236736	SAR1B	EV929928
MYL1	MYOZ1		TNNT3					TNMD	MYL1	MYH7	FL593097	AIFM1	CK452102	MYL1	DN123606	MAPK3	DV897892	HSF2	MYLPF	SFRS1	BP160020				EW088403	HDAC2	TPM2	PPP1CA	VDAC1	MYOM1	FL593097	CD36	BM190702		DN128469	SMAD4	DT326182
MYOD1	MYOZ2		TPM2					TNNT3	MYLPF	MYLPF	BX915041	CDC42EP1	DB814005	MYLPF	DV225793	SLN	BX665103	SPARC	MYOZ1		BX922054				GPD1	NCSTN	TPM3	NCOR2	IGF2	NDRG2	EW470718		BW965256		BM190355	SMYD2	CK455049
NCSTN	MYOZ3		TPM3					TPM2	MYOZ1	NRAP	BM190702	CRKL	DN106862	NRAP	EW421594		BM190542	CD200	GNAS		BX923548				SLC25A4	CASQ1	TPRKB	MYOZ2	MAPK12	NDUFS1	DT320257		BX922054		DV901297	SPARC	CN164036
NFATC4	NAPA		BX922054					TYK2	NRAP	PLN	DV896376	DAG1	DR082404	PLN	BX923538		AK1	ETV1	RYR1		CN163858				APOBEC2	ARHGEF11	UCP3	MAPKAPK5	BX922054	NDUFS4	DT324398		CB477123		DV900662	TNNI2	BM190702
NFKB1	NDUFS1		CK454645					VCAM1	PLN	PPP1CB	DT327101	EPAS1	DR082636	PPP1CB	BM190355		FABP3	ATP6AP1	SAR1B		DR082404				SFRS1	THBS3	BAG1	MEF2C	BX923548	VDAC1	DT322380		CK452102		EV983935	USP7	DY419608
NOTCH2	NDUFS4		DR082404					CENPF	PPP1CB	PPP2CA	BX923253	ING2	DT320474	PPP2R1A	DV896278			HEY2	SMAD4		DV897892					NPR1	DAG1	MMP2	CN163858	COX7C	DY419948		CX062690		DT327101	AKIRIN2	DN125638
PAPSS1	PDCD2		EW236736					CNN2	PPP2CA	PPP2R1A	BM190687	MAP1LC3A	DT327799	PRDX6	EW301853			SERPINE2	SMPX		DV904076					NOTCH2	FLNC	MYBPH	DR082404	IGF2	DT328059		DN123606		PDLIM5	FN1	BW965256
PPM1A	PDCD5		DV904076					DAG1	PYGM	PYGM	CN156635	MEF2D	DT329597	QDPR	COL6A1			GATA6	SPARC		DT321372					CASQ2	GRSF1	MYF6	DV896376	MAPK12	DT335508		DN128469		SPARC	GPC3	DB790438
PPP2R1A	PICALM		CK452102					FEZ2	RYR1	QDPR	DT325394	MLF1	DV225793	RAMP1	FOS				TEAD4		DT329597					SOX17	HSPB7	MYH2	DV904076	BX922054	DT329597		DN134248		HSPA1A	ID1	AJ953775
QDPR	RAMP1		BX926893					HOXA10	SAR1B	SETDB1	EW168087	NAPA	HSPA1A	SLC2A4	HSPA1A				TNMD		EW137538					FZD6	LSM6	NRAP	DT321969	BX923548	DN105634		DR082404		FOS	ING2	BI186417
SAR1B	RYR1		DT327799					LSM6	SLC2A4	SMPX	DT330909	NDRG2	PDLIM5	SMAD4	HSPA1A				TNNI2		BM190542					EP300	MAP1LC3A	PPP1CB	CT863733	DR082404	BM190547		DV896376		CYR61	ING4	AJ956714
SFRP4	SGCD		DY426090					MAP4	SMPX	SPARC	FOS	NDUFS1	AK1	SOD2	HSPB2				TNNT1		BM190692					MYF5	MAP1LC3B	PPP2CA	DT329597	DV900662	BW980850		DV901297		APOBEC2	PPHLN1	DY410887
SHC1	SLC31A2		SPARC					MEN1	SOD2	TNNI2	FOXK2	IGF2		SPARC	AK1				TNNT3		DN128580					RPS6KA5	MAP4	PPP2R1A	BX923253	DV901297	DN101101		DV904076			SLC31A2	EW155994
SLC2A1	SMPX		PDLIM5					MLLT3	TNNI2	TYK2	CLIP1	MAPK12		TNNI2	APOBEC2				TPM2		DT324183					NR2F2	MORF4L2	QDPR	DR082636	DV904076	DT330909		EW236736			THY1	CN157374
SMAD4	STMN1		SPARC					MYOM1	TNNT1	CD320	AK1	AJ947557		TNNT1	MAPK3				TPM3		CK454645					MESDC2	NDUFS1	RHOB	BM190702	EW421594	DT321372		FL593097			COL1A2	BP143486
SPARC	TGFB3		FOS					PAPSS1	TPM3	FEZ2	SLN	BE014034		TNNT3	NFATC3				FLNC		DT321969					MYLK	NDUFS4	SERPINE1	BX665103	EW236736	BX665103		SLC25A4			IGFBP3	EW421594
SRC	TNNT1		SLC25A4					PDCD2	UCP3	FLNC		BX923253		TPM2	SLC25A4				GPC3		CT863733					BMPR1A	PDCD5	SOD2	DN101101	CX062690	DB787461		APOBEC2			LOC414908	ATP2A2
STAT3	TNNT3		NOV					PTN	AIFM1	FSTL4		BX923548		TPM3					MYOM1		BI185477					COX6A1P2	TNFRSF12A	SPARC	DN128580	BM190355	DT331423		NFATC3			PPP1R12A	COL6A1
THBS1	TPM2		APOBEC2					SLC31A2	C16orf5	HSPB7		CB477123		VCAM1					SLC31A2		CN161458					ITGA6	UTP11L	THBS1	DT328768	EW239364	CLIP1					TRPC1	CUGBP2
THY1	TPM3							TBCB	CD320	MORF4L2		CN163858		AIFM1					COL1A2		BM190687					TTN	VDAC1	TNNI2	DT327799	DV896278	HSF1					BM194685
TNMD	TPRKB							CK454645	FLNC	NDUFS1		DN104419		AKIRIN2					IGF2		FL593097					ACVR1	BX665103	VCAM1	BM190542	DV225793	CTNNA1					DT324398
TUBB2A	TTN							BX915041	FSTL4	NDUFS4		DT320257		C16orf5					POPDC3		CK454516					PLCB4	BX670342	BAG1	BM190470	BX671118	PDLIM5					DB794976
TUBE1	TUBA4A							BX918412	HSPB7	PAPSS1		DT321969		DAG1					PPP1R12A		PDLIM5					JAG1	BX671118	CLPTM1L	BM190687	EV867707	SPARC					AJ950175
TYK2	VDAC1							BX922054	IFRD1	TGIF1		DT323640		MEF2D					BP160020		GPD1					E2F1	CK452102	DAG1	EW470718	DV896376	GPD1					BP144557
USP7	IGF2							BX923548	MAP1LC3A	TNFRSF12A		DT324725		NDUFS1					BX922054		SLC25A4					MYH7B	BX915041	FLNC	DB814005	SLC25A4	KDR					DY419948
COL1A2	POPDC3							BX925993	MAP1LC3B	UTP11L		DT331317		PDCD2					BX926893		FABP3					SRC	BX923538	GRSF1	GPD1	FABP3	AK1					DT325394
LOC414908	DV897892							CJ024171	UTP11L	COX7C		DT331844		SGCD					CN163858		APOBEC2					FGD1	CN161458	HSPB7	FOS	APOBEC2	SLN					DY418386
LOC733612	CK467405							DN118117	VDAC1	PPP1R12A		DT333190		TBCB					DV897892		CD36					STIM1	DN123606	LETM1	RHOQ	HSPB2						CJ008695
PTEN	DN118117							DN119934	BP160020	CK452102		DV896278		TGIF1					DV904076		SLN					MSTN	DQ000205	LSM6	FABP3	PPARGC1A						DT324145
DY418386	EW421594							DN120593	CK452102	BX926893		DV897892		MAPK12					DT324398							VCAM1	DR082404	MAFG	APOBEC2							BP438382
DT330028	EV867707							DV897892	DV900662	DV900662		DV900662		SIRT1					EW137538							SMAD1	DV225793	MAP1LC3B	AK1							DT321883
EW101413	DN120593							DT320856	DV901297	DV901297		DV904076		BX670342					EW236736							ITGB1	DV896278	MLLT3	SLN							DN104419
EW309452	DN123606							DT332656	DV904076	DV904076		FL593097		BP160020					DT322380							IGFBP2	DV900662	MORF4L2								DT335747
DT322463	BX915041							EV986754	DT320474	CX062690		FABP3		BX922054					BM190702							ABCG2	DV901297	NAPA								DT321652
BP438382	BX923538							EW088403	DT324725	DT320474		FOXK2		CN156635					DV902328							EGF	DV904076	OTUB1								BW980850
BW980850	BX924637							EW137538	EW236736	EW137538		APOBEC2		CN163858					DT320734							SMAD4	CX062690	PDCD5								DT319757
DT322380	BX665103							EW168087	EW421594	EW236736		CD36		DN134248					DT329597							CD34	DY405541	TGIF1								BP160020
BP144557	EW088403							BI183962	BM190547	EW421594		COL6A1		DT320257					DN105634							CALCRL	DT324725	TNFRSF12A								DN105634
DT325394	DN128580							BM190702	CX062690	DN128469		SLC25A4		DT320474					EH008219							MGP	DT327101	UTP11L								DT331583
DT321652	BX925993							DR082404	BM190355	DV897892				DT327799					DT334976							PPP3CA	DT333190	CK452102								BM190349
DT325703	DR082404							BM190692	DN128469	EW239364				DT329597					DT327799							ATP1B4	EW421594	CN161458								DT320681
DT324398	DT324183							BX926893	DQ000205	EV867707				DT330909					CF367336							CACNA2D1	BM083163	DN123606								DN105652
DN105634	DB788903							DB784140	DT321969	BX670342				EW168087					EW309452							MMP2	BM190355	DV225793								DT335508
DY426090	BP143486							DT324339	DT325708	DN123606				EW236736					BM190349							RAMP1	HSF2	DV900662								DT322380
DT331317	BX918412							BI186417	DT320257	EV978603				BM190547					EW239364							MMP14	HSPA1A	DY405541								DT334976
AJ953775	CN163858							BM190522	DV896278	EV983935				DB787461					BM190547							GNAS	PRMT5	DT333190								AJ944720
BX926893	EW137538							BM190542	DT330112	BX671118				DN106862					DV896376							APP	SLC25A4	BM190355								EW309452
CJ024171	DN112655							EW222667	DT330028	DT327799				DT325394					DT332656							CDH5	KLF15	BX670342								DT322463
CN161880	EW222667							DV896376	DT331413	DT322875				EW382931					DN101101							MYOD1	FABP3	DN105634								BX924862
EW236736	DV904076							EW207913	DB814005	L20460				CJ008695					DT325159							HMOX1	ITGA9	EW137538								DN101101
CJ008695	BX922054							BX924637	BX670342	DV225793				DT331423					DN106862							AKIRIN2	CYR61	DB784140								BM190547
DB787461	BM190702							DN112655	DT335747	DB787461				DQ000205					DT327646							MYLPF	CLIP1	DT327101								ATF6
DT323640	EW055180							AJ956714	BW980850	DT322380				DT333190					MAP2K1							MYH2		DT332551								ATP2A2
DV225793	BX923548							CN163858	BX670120	AJ953775				FL593097					PDLIM5							RYR1		BX926893								CLIP1
EV986754	BX672955							BP143486	L20460	DQ000205				EV983935					HSPB2							TGFB1		BX671118								COPB1
YY1	DV896376							BW979212	AJ947557					EW055180					SLC25A4							CA3		DQ000205								CTNNA1
SPARC	BM190542							DT330297	IFRD1					DN105634					NOV							MSN		BX923538								ACVR2A
JUN	DT324339							DT323685	PDLIM5					EV978603					APOBEC2							STMN1		CK454645								ERG
COPB1	CK454645							CN161880	PRMT5					EW088403					KDR							DMD		DB787461								ETV1
GTF2I	CT863733							CK467405	SLC25A4					BW980850					AK1							GUCY1B3		DT324398								FN1
MAPK3	HSF2							DY426090	ATP6AP1					DT335508					SLN							SPARC		BX919338								ICAM1
TRIM54	PDLIM5							CXCL12	FABP3					EW309452												TNNI2		DT331317								KDR
CD200	HSPB2							MAPK3	ATP2A2					BX665103												CF367336		DT325159								MAP2K1
PRMT5	FOXK2							SPARC	ATP2A2					DT328768												BP160020		EV983935								SAMD4A
ETV1	SLC25A4							HSPB2	ITGA9					DT324752												BP144557		DN129862								SPARC
PTK2	FABP3							KIAA0101	CYR61					CK467405												CK454516		CK467405								YY1
ATP2A2	APOBEC2							FHL2	CLIP1					BX915041												CK454645		DT322380								GADD45G
HEY2	AK1							BTG3	PPARGC1A					DB788903												CK463582		DT326182								MAP4
NOV	COL6A1							NOV	AK1					BW979212												BX922054		BM083163								EW301853
KDR	SLN							BCL9						DT322463												BX926488		BX925530								CABIN1
SFRS1								APOBEC2						DT324398												BX926893		EV978603								EDNRA
ACVR2A								SERPINE2						FOXK2												CN157525		AJ956714								MSTN
								COL6A1						GPD1												CN161880		DN118117
														GTF2I												CN163858		PDLIM5
														HSF1												DN101101		MCAT
														ATP2A2												DN101901		SPARC
														ATP6AP1												DN104419		HSPB2
														JUN												DN105634		HSPA1A
														PDLIM5												AJ950175		PRMT5
														SFRS1												AJ944335		SLC25A4
														SLN												DV897892		HSF1
														SPARC												DY418386		CTNNA1
														SPARC												DY419948		MAPK3
																										DB787461		HSF2
																										DB805308		ITGA9
																										DT319757		CYR61
																										DT320856		HMGN4
																										DT321372		SFRS1
																										DT321652		COL6A1
																										DT322380
																										DT323640
																										DT323685
																										DT324145
																										DT324183
																										DT324398
																										DT325394
																										DT325703
																										DT325991
																										DT327646
																										DT327799
																										DT329597
																										DT329656
																										DT329712
																										DT332656
																										DT333000
																										DT334976
																										DT335508
																										EV986754
																										EW088403
																										EW137538
																										EW236736
																										EW239364
																										EW309452
																										FL593097
																										L20460
																										BI183962
																										BM194685
																										BM190692
																										BM190702
																										MAP2K1
																										IVNS1ABP
																										SPARC
																										CD200
																										KIAA0101
																										MAPK1
																										GPD1
																										ETV1
																										FHL2
																										CTNNA1
																										COPB1
																										GTF2I
																										ATP2A2
																										NOV
																										BCL9
																										APOBEC2
																										CASK
																										KDR
																										SERPINE2
																										SFRS1

## Sheet: Table S6.2
Supplemental table 6.2 The distributions of 595 genes probably related to muscle development.
up regulated with development	down regulated with development	high expressed in two breeds prenatal	high expressed in two breeds postnatal	down (LR/LT prenatal)	up (LR/LT prenatal)	down (LR/LT postnatal)	up (LR/LT postnatal)	LR-1	LT-1	LR-2	LT-2	LR-3	LT-3	LR-4	LT-4	LR-5	LT-5	LR-6	LT-6	LR-7	LT-7	LR-8	LT-8	LR-9	LT-9	LR-10	LT-10
TTN	MAPRE1	FHL2	CKM	111	58	6	2	MTMR7	MTMR7	COL5A3	COL5A3	IFRD1	IFRD1	COL5A3	COL5A3	FEZ2	FEZ2	BAG3	BAG3	UCP3	UCP3	CCNG1	CCNG1	ENO3	ENO3	EGF	PYGM
AMPD1	FGD1	E2F1	AMPD1	ADAMTS20	IGFBP6	CASQ2	MYBPH	ITGA5	ITGA5	IFRD1	IFRD1	COL5A3	COL5A3	FGL2	FGL2	DACH2	DACH2	PRMT5	PRMT5	SLC25A4	SLC25A4	FOS	FOS	CCNG1	CCNG1	CRELD1	GYS1
ATF4	MAPRE1	ACVR1	CASQ1	APP	MICAL1	CYP27A1	CUGBP2	SRC	SRC	MYH7B	MYH7B	CK454645	CK454645	FEZ2	FEZ2	CAV1	CAV1	MB	MB	EPAS1	EPAS1	GYS1	GYS1	EW470718	EW470718	CRKL	CCNG1
CACNG1	MARK1	ABCG2	CCNG1	ATF4	SHISA5	DAG1		ACTN1	ACTN1	DN112655	DN112655	BX922054	BX922054	DT332656	DT332656	CAV2	CAV2	GADD45G	GADD45G	ING2	ING2	EW470718	EW470718	FL593097	FL593097	CD74	FOS
DES	MESDC2	BMPR1B	SMYD2	BMPR2	ARHGEF11	SLC31A2		APP	APP	CN163858	CN163858	DV904076	DV904076	DB784140	DB784140	PPARGC1A	PPARGC1A	DHRS7	DHRS7	ANGPTL4	ANGPTL4	DT328768	DT328768	EGF	GYS1	CCNG1	GPD1
ENO3	MORF4L2	CASQ2	SOD2	CACNA2D1	MTMR14	DT322875		BMP4	BMP4	BX922054	BX922054	EW236736	EW236736	DT332967	DT332967	NOTCH4	NOTCH4	UCP3	UCP3	FOS	FOS	BX923253	BX923253	BTG2	GPD1	ABRA	MYL1
MYH7	SETDB1	CD34	WWP1	CALCRL	EIF2B5	PTK2		CD320	CD320	DV902328	DV902328	EW137538	EW137538	COL6A1	CLTC	DT324339	STIM1	SLC25A4	SLC25A4	CD74	CD74	ABRA	PYGM	ABRA	MYL1	AK1	EW168087
MYL1	PTN	CDH5	MAPK12	CASQ2	TCF7L2			CNN2	CNN2	GNB2L1	FERMT2	DT325159	DT325159	MYF6	FN1	EW168087	ADAMTS20	MUSTN1	MUSTN1	SLC25A4	SLC25A4	BTG2	MYL1	CRELD1	PYGM	FOS	DT328768
MYLPF	QDPR	CENPF	CKM	CLTC	TPM2			GAP43	GAP43	PTN	FLNC	DN112655	DN112655	DN123732	HMOX1		ITGA6	LETM1	LETM1	MB	MB	GHR	GPD1	AK1	DT328768	BX672955	EW470718
MYOZ1	THBS1	COPZ1	DT330112	CXCL12	TPM3			MAP1A	MAP1A	APH1A	MYOM1	DT325159	DT325159	BX926893	HOXA10		ATP1B4	HSPB7	HSPB7	MAP1LC3A	MAP1LC3A	DT330909	EPAS1	FOS	BM190470	BX673343	BM190470
MYOZ3	ADRBK1	CREBZF	DR082404	DLK1	TPRKB			NFATC4	NFATC4	MYOG	ACVR1	FEZ2	GOLGB1	DB805600	CDC42EP2		FGL2	ANGPTL4	ANGPTL4	ACTN2	ACTN2		CN163858	BX672955	FL593097	DB814005	FL593097
NDUFS1	AES	DLK1	EW470718	FHL1	BCL2L15			NR2F2	NR2F2	SLC31A2	FBN2	FLNC	CREBZF	EV993023	ING4		KLF6	ANKRD1	ANKRD1	AIFM1	AIFM1		DN101101	DB814005		DN125939
P2RY1	COX6A1P2	DSTN	DT325708	GUCY1B3	FLNB			PTN	PTN	TGFB3	GHR	HSPB1	AKIRIN2		NFKB1		MYF6	CD320	CD320	MLF1	MLF1		DN105634	BX673343		EW470718
RAMP1	FGD1	EIF2B1	DT321969	HMOX1	LSM6			TRIM54	TRIM54	IGF2	GNAS	NFKBIB	JUN		KDR		MYH2	CFL2	CFL2	DT324725	DT324725		DT329597	DN125939
RYR1	HDAC2	EP300	DT320257	ID2	MEN1			Eya1	Eya1	FOXK2	GPC3	PACSIN3	APH1A		BX924862		IVNS1ABP	FHL1	FHL1	CB477123	CB477123		EW470718
SGCD	IGFBP2	FERMT2		INSR	PDCD2			CD200	CD200	SERPINE2	ING4	PURA	ING4		DN100926		CDC42EP2	FLNC	FLNC	BX923253	BX923253		DT328059
SLC2A4	PAPSS1	FLNB		ITGB1	TBCB			HEY2	HEY2	STMN1	ITGA5	SFRS2	MYOG		DN112655		DHRS7	IKBKG	IKBKG	DV900662	DV900662		DT330909
TNNI2	SETDB1	GOLGB1		KLF6	BX918412			ETV1	ETV1	E2F5	MAP3K7	PTN	SLC31A2		AJ950175		DMD	BAK	BAK	AJ947557	AJ947557		FL593097
TNNT1	SHC1	HDAC7		RPS6KA5	DN118117			FBN2	FBN2	DT324183	MEST	MORF4L2	MAPK1				LOC414908	MYBPH	MYBPH	EW470718	EW470718
TNNT3	SLC2A1	ITGA5		MYLK	BQ602411			CDC42EP4	CDC42EP4	EW137538	MYH3	MYF6	TEAD4				DT333000	MYOZ2	MYOZ2	DT328768	DT328768
VDAC1	TUBE1	JAK2		COX6A1P2	DN123732			EW101413	EW101413	BM190542	MYL2	CK452102	IGF2				DT329712	NRAP	NRAP	DQ058292	DQ058292
POPDC3	PTEN	LIMA1		PLCB4	BX915041			CJ024171	CJ024171	EW222667	MYOD1	DN108763	CD36				DT330028	PPARGC1A	PPARGC1A	FOXO1	MYOM1
PDLIM5	YY1	MAPK13		NOTCH2	EW137996			BX670766	BX670766	BP143486	NOTCH2	EW329931	EDNRA				DT320474	GADD45A	GADD45A	CD36	PLN
AK1	CK467405	MDGA1		BMPR1A	DN120593			AJ953775	AJ953775	BX918412	TNMD	BX923548	CDC42EP2				DT325703	ITGA9	ITGA9	DT331844	FABP3
TPM3	CENPF	MMP14		DCUN1D1	EV993023			DT331358	DT331358	BX924637	TUBB2A	DY426090	DT324183				DT327646	CYR61	CYR61	FL593097	MGP
DT331423	GTF2I	MMP2		CCPG1	BX923538			HOXA10	GAP43	EW155994	COL1A2	CJ024171	EW137538				AJ947557	FABP3	FABP3	DT327101	BX922054
BM190547	DB787461	NCOR2		FZD6	BX924637			IKBKB	CSRP2	BI185477	PPP1R12A	BX926893	BM190542				AJ944335	ACTN2	ACTN2	DT330909	CN163858
BM190687	EV986754	NCSTN		ITGA6	EW222667			TNMD	MAPK3	CT863733	CDC42EP4	BX918914	EW309452				BX924862	ABRA	ABRA	DT320257	DN101101
BX665103	DY426090	RHOB		MAP3K7	DT320856			TUBB2A	MDFI	BX923548	MAP2K1		DT321372				BX926893	DT324725	DT324725		DT329597
DN101101	DT334659	SENP2		MAPK8	BX672955			ATP2A2	IGFBP3	BX926488	DT320734		EH008219				DN112655	DQ000205	DQ000205		EW470718
DR082636	CN161880	SFRP4		MEF2A	AK239584.1			JUN	SERPINE2	DN120593	DN101101		BI185477				EW101413	CK452102	CK452102		DV901297
BM190355	BI186417	SMAD1		MSN	EW168087			ITGA9	STMN1	DB788903	DN105634		CT863733				L20460	CK455049	CK455049		BM190470
DT327799	CN157374	THBS1		MSTN	EW036194			EDNRA	AJ945191	CK454645	DT329597		BX924862				DT329712	DV900662	DV900662		EW421594
	BP438953	THBS3		MYH3	BX925993			EH008219	BX670766	AK239436.1	DT334976		DN105652					DV901297	DV901297
		TP53		MYL1	BM190522			DT327646	DT327101	BX925993	DV904076		DN112655					DT330028	DT330028
		TYK2		MYOD1	BX918914				DT331358	AK240563.1	EW236736		DT321372					DV896278	DV896278
		SIRT1		NFKB1	CK454137				DN120593	AK232205.1	EW137538		AK237923.1					BX670342	BX670342
		CASK		GNAS	DB805600				DT328931	DT323520	AJ944720		CN163858					BX923253	BX923253
		BTG3		PPP3CA	DV896376					DT324339	DT322380		DT329597					EW421594	EW421594
		FHL2		SAR1B	EV929928					EW055180	BP438382		EV867707					DT324725	DT324725
		SFRS1		SMAD4	DT326182						DT321652		DT32433					BX670120	BX670120
		OTUB1		SMYD2	CK455049						DV902328							ATP1B4	ARAF
		TUBE1		SPARC	CN164036						BX926893							ATF6	ANKRD1
		KIAA0101		TNNI2	BM190702						EW236736							FABP3	TNFRSF12A
		NOV		USP7	DY419608						EW101413							MGP	SERPINE1
		BCL9		AKIRIN2	DN125638													MYH2	PLN
		FGF11		FN1	BW965256													MYL2	PDCD5
		E2F1		GPC3	DB790438													MYO18B	CDKN3
		E2F5		ID1	AJ953775													PLN	IGFBP6
		VCAM1		ING2	BI186417													ATP2A2	DAG1
		APP		ING4	AJ956714													CD36	MAP1LC3A
		SOX17		PPHLN1	DY410887													FSTL4	MAP1LC3B
		SRC		SLC31A2	EW155994													AJ950175	LSM6
		OTUB1		THY1	CN157374													BP160020	MYF6
		PPP2R1A		COL1A2	BP143486													DT320474	TPRKB
		BX926893		IGFBP3	EW421594													L20460	KLF15
		DN119934		LOC414908	ATP2A2													DT329712	MCAT
		EW239364		PPP1R12A	COL6A1														UTP11L
		DT327646		TRPC1	CUGBP2														FOXO1
		DB787461		BM194685															BM190355
		DT330297		DT324398															DN123732
		CF367336		DB794976															DT333190
		DT323640		AJ950175															EW421594
		DT325159		BP144557															DN123732
		DT332656		DY419948															DT327101
		DT332967		DT325394															DT324752
		DT323640		DY418386															CK452102
		EV983935		CJ008695															DT326182
		DT331317		DT324145															DT327101
		DT323685		BP438382															BX671118
		BI183962		DT321883															DY405541
				DN104419															DV225793
				DT335747															BX923538
				DT321652
				BW980850
				DT319757
				BP160020
				DN105634
				DT331583
				BM190349
				DT320681
				DN105652
				DT335508
				DT322380
				DT334976
				AJ944720
				EW309452
				DT322463
				BX924862
				DN101101
				BM190547
				ATF6
				ATP2A2
				CLIP1
				COPB1
				CTNNA1
				ACVR2A
				ERG
				ETV1
				FN1
				ICAM1
				KDR
				MAP2K1
				SAMD4A
				SPARC
				YY1
				GADD45G
				MAP4
				EW301853
				CABIN1
				EDNRA
				MSTN

## Sheet: Table S6-3
.gene identifier	pig_GI	pig_Genebank	pig_Description	pig_Gene symbol	human_Genebank	human_Gene ID	human_Gene	human_Gene des	Lde-1_raw(4233958)	Lde-1_norm(TPM)	Lde-2_raw(4465001)	Lde-2_norm(TPM)	Lde-3_raw(4706547)	Lde-3_norm(TPM)	Lde-4_raw(3694014)	Lde-4_norm(TPM)	Lde-5_raw(4211993)	Lde-5_norm(TPM)	Lde-6_raw(3116426)	Lde-6_norm(TPM)	Lde-7_raw(2908962)	Lde-7_norm(TPM)	Lde-8_raw(2157111)	Lde-8_norm(TPM)	Lde9_raw(3430462)	Lde9_norm(TPM)	Lde10_raw(3617816)	Lde10_norm(TPM)	LT-1_raw(2955595)	LT-1_norm(TPM)	LT-2_raw(5080215)	LT-2_norm(TPM)	LT-3_raw(2615631)	LT-3_norm(TPM)	LT-4_raw(4677028)	LT-4_norm(TPM)	LT-5_raw(5322022)	LT-5_norm(TPM)	LT-6_raw(4415414)	LT-6_norm(TPM)	LT-7_raw(5127896)	LT-7_norm(TPM)	LT-8_raw(3953120)	LT-8_norm(TPM)	LT-9_raw(3282841)	LT-9_norm(TPM)	LT-10_raw(2932964)	LT-10_norm(TPM)
gi|113205559|ref|NM_001044526.1|	113205559	NM_001044526.1	Sus scrofa peroxisome proliferator-activated receptor alpha (PPARA), mRNA	PPARA	AB307690.1	5465	PPARA	peroxisome proliferator-activated receptor alpha	0	0	0	0	2	0.42	0	0	2	0.47	4	1.28	0	0	0	0	0	0	0	0	0	0	0	0	0	0	4	0.86	4	0.75	0	0	0	0	0	0	0	0	0	0
gi|47523813|ref|NM_214379.1|	47523813	NM_214379.1	Sus scrofa peroxisome proliferator-activated receptor gamma (PPARG), mRNA	PPARG	NM_015869.4	5468	PPARG	peroxisome proliferator-activated receptor gamma	2	0.47	3	0.67	0	0	2	0.54	4	0.95	2	0.64	2	0.69	0	0	0	0	0	0	0	0	0	0	3	1.15	5	1.07	8	1.5	0	0	4	0.78	0	0	0	0	4	1.36
gi|47522913|ref|NM_214049.1|	47522913	NM_214049.1	Sus scrofa uncoupling protein 3 (UCP3), nuclear gene encoding mitochondrial protein, mRNA	UCP3	NM_003356.3	7352	UCP3	uncoupling protein 3 (mitochondrial, proton carrier)	0	0	0	0	7	1.49	2	0.54	9	2.14	71	22.78	123	42.28	11	5.1	7	2.04	14	3.87	0	0	0	0	4	1.53	0	0	9	1.69	129	29.22	164	31.98	15	3.79	17	5.18	28	9.55
gi|115553719|dbj|AK239906.1|	115553719	AK239906.1	Sus scrofa mRNA, clone:UTR010010A12, expressed in uterus		NM_001540.3	3315	HSPB1	heat shock 27kDa protein 1	124	29.29	354	79.28	648	137.68	979	265.02	526	124.88	943	302.59	123	42.28	346	160.4	112	32.65	171	47.27	81	27.41	145	28.54	132	50.47	451	96.43	655	123.07	3405	771.16	477	93.02	230	58.18	238	72.5	1029	350.84
gi|84579912|ref|NM_001038644.1|	84579912	NM_001038644.1	Sus scrofa angiopoietin-like 4 (ANGPTL4), mRNA	ANGPTL4	AK303269.1	51129	ANGPTL4	angiopoietin-like 4	54	12.75	16	3.58	29	6.16	18	4.87	41	9.73	120	38.51	100	34.38	13	6.03	15	4.37	10	2.76	26	8.8	14	2.76	7	2.68	45	9.62	47	8.83	197	44.62	134	26.13	17	4.3	20	6.09	33	11.25
gi|115550002|dbj|AK232237.1|	115550002	AK232237.1	Sus scrofa mRNA, clone:LNG010110H12, expressed in lung		BC008011.1	6678	SPARC	secreted protein, acidic, cysteine-rich (osteonectin)	196	46.29	159	35.61	663	140.87	0	0	437	103.75	55	17.65	107	36.78	63	29.21	4	1.17	0	0	2528	855.33	2298	452.34	1159	443.11	2865	612.57	2194	412.25	352	79.72	191	37.25	795	201.11	156	47.52	300	102.29
gi|47522691|ref|NM_213897.1|	47522691	NM_213897.1	Sus scrofa acyl-Coenzyme A dehydrogenase, long chain (ACADL), nuclear gene encoding mitochondrial protein, mRNA	ACADL	NM_001608.3	33	ACADL	acyl-Coenzyme A dehydrogenase, long chain	155	36.61	345	77.27	375	79.68	212	57.39	334	79.3	617	197.98	294	101.07	100	46.36	85	24.78	200	55.28	87	29.44	229	45.08	179	68.43	286	61.15	413	77.6	537	121.62	1314	256.25	116	29.34	174	53	261	88.99
gi|115554099|dbj|AK233308.1|	115554099	AK233308.1	Sus scrofa mRNA, clone:LVRM10119G09, expressed in liver		NM_001608.3	33	ACADL	acyl-Coenzyme A dehydrogenase, long chain	0	0	0	0	0	0	0	0	0	0	0	0	2	0.69	0	0	0	0	0	0	0	0	0	0	0	0	2	0.43	3	0.56	0	0	4	0.78	0	0	0	0	0	0
gi|47522897|ref|NM_214039.1|	47522897	NM_214039.1	Sus scrofa acyl-Coenzyme A dehydrogenase, C-4 to C-12 straight chain (ACADM), nuclear gene encoding mitochondrial protein, mRNA	ACADM	NM_000016.4	34	ACADM	acyl-Coenzyme A dehydrogenase, C-4 to C-12 straight chain	26	6.14	123	27.55	106	22.52	62	16.78	94	22.32	225	72.2	231	79.41	78	36.16	239	69.67	609	168.33	18	6.09	38	7.48	68	26	59	12.61	106	19.92	259	58.66	1618	315.53	180	45.53	144	43.86	181	61.71
gi|115553196|dbj|AK232994.1|	115553196	AK232994.1	Sus scrofa mRNA, clone:LVRM10064D11, expressed in liver	FOS	NM_005252.3	2353	FOS	FBJ murine osteosarcoma viral oncogene homolog	65	15.35	23	5.15	146	31.02	68	18.41	109	25.88	88	28.24	751	258.17	630	292.06	2713	790.86	691	191	41	13.87	51	10.04	68	26	47	10.05	124	23.3	160	36.24	349	68.06	256	64.76	6	1.83	214	72.96
gi|194035848|ref|XM_001928966.1|	194035848	XM_001928966.1	PREDICTED: Sus scrofa similar to calsequestrin skeletal muscle (LOC100156448), mRNA	LOC100156448	NM_001231.4	844	CASQ1	calsequestrin 1 (fast-twitch, skeletal muscle)	33	7.79	39	8.73	49	10.41	149	40.34	629	149.34	1261	404.63	818	281.2	1666	772.33	369	107.57	687	189.89	19	6.43	142	27.95	109	41.67	548	117.17	1272	239.01	672	152.19	2497	486.94	2217	560.82	2297	699.7	1684	574.16
gi|209863050|ref|NM_001135960.1|	209863050	NM_001135960.1	Sus scrofa actin-binding Rho activating protein (ABRA), mRNA	ABRA	AK092694.1	137735	ABRA	actin-binding Rho activating protein	25	5.9	58	12.99	141	29.96	179	48.46	135	32.05	312	100.11	223	76.66	414	191.92	1552	452.42	894	247.11	18	6.09	84	16.53	57	21.79	175	37.42	176	33.07	362	81.99	261	50.9	82	20.74	125	38.08	125	42.62
gi|52351697|gb|AY610127.1|	52351697	AY610127.1	Sus scrofa clone Clu_76786.scr.msk.p1.Contig1, mRNA sequence		NM_000476.2	203	AK1	adenylate kinase 1	97	22.91	1075	240.76	675	143.42	573	155.12	865	205.37	940	301.63	3320	1141.3	2862	1326.77	12778	3724.86	14322	3958.74	98	33.16	438	86.22	279	106.67	624	133.42	646	121.38	475	107.58	4976	970.38	4438	1122.66	3746	1141.08	1718	585.76
gi|113205497|ref|NM_001044527.1|	113205497	NM_001044527.1	Sus scrofa enolase 3 (beta, muscle) (ENO3), mRNA	ENO3	NM_053013.2	2027	ENO3	enolase 3 (beta, muscle)	100	23.62	600	134.38	1625	345.26	2624	710.34	3923	931.39	4469	1434.01	38709	13306.8	26992	12513	100487	29292.6	49725	13744.5	122	41.28	739	145.47	1025	391.87	2623	560.83	5271	990.41	7499	1698.37	34374	6703.33	19966	5050.69	42426	12923.6	13943	4753.89
gi|47523501|ref|NM_214213.1|	47523501	NM_214213.1	Sus scrofa phospholamban (PLN), mRNA	PLN	NM_002667.3	5350	PLN	phospholamban	2	0.47	9	2.02	26	5.52	56	15.16	106	25.17	147	47.17	66	22.69	59	27.35	22	6.41	46	12.71	2	0.68	10	1.97	21	8.03	47	10.05	207	38.89	193	43.71	339	66.11	55	13.91	98	29.85	155	52.85
