# Supplementary material for: Comparative Analyses by Sequencing of Transcriptomes during Skeletal Muscle Development between Pig Breeds Differing in Muscle Growth Rate and Fatness
Source: PLoS One. 2011 May 26;6(5):e19774. doi: 10.1371/journal.pone.0019774 (PMC3102668; doi:10.1371/journal.pone.0019774)
Supplement: Table S7 — Signal-flow analysis of muscle developmental genes. (XLS) [file pone.0019774.s019.xls]

## Sheet: Landrace-signal-flow
Gene1	Gene2	relation weight	interaction
ACACB	CPT1B	470.99	compound
ACTN1	ITGA2B	605.6	binding/association
ACTN1	ITGA5	307.94	binding/association
ACTN1	ITGA6	340.37	binding/association
ACTN1	ITGA9	-309.56	binding/association
ACTN1	ITGAV	-375.76	binding/association
ACTN1	ITGB1	571.46	binding/association
ACTN1	ITGB3	-119.9	binding/association
ACTN1	ITGB5	2337.44	binding/association
ACTN1	ITGB6	-82.53	binding/association
ACTN1	MAGI3	-241.15	binding/association
ACTN2	ITGA2B	34.71	binding/association
ACTN2	ITGA5	7.38	binding/association
ACTN2	ITGA6	5.84	binding/association
ACTN2	ITGA9	55.71	binding/association
ACTN2	ITGAV	11.8	binding/association
ACTN2	ITGB1	42.02	binding/association
ACTN2	ITGB3	-77.73	binding/association
ACTN2	ITGB5	-123.65	binding/association
ACTN2	ITGB6	-44.77	binding/association
ACTN2	MAGI3	57.37	binding/association
ACVR1	SMAD3	1.03	phosphorylation
ADAM17	NOTCH2	10.65	activation
ADAM17	NOTCH4	16.05	activation
ADRBK1	CCR5	-0.98	phosphorylation
ADRBK1	CX3CR1	1.6	phosphorylation
ADRBK1	CXCR4	-0.15	phosphorylation
ADRBK2	CCR5	15	phosphorylation
ADRBK2	CX3CR1	-3.1	phosphorylation
ADRBK2	CXCR4	9.84	phosphorylation
ANAPC5	ANAPC5	12.46	activation
ANAPC5	ANAPC7	-10.88	activation
ANAPC5	CCNB2	13.14	ubiquination
ANAPC5	CDH1	3.69	activation
ANAPC7	ANAPC5	10.21	activation
ANAPC7	ANAPC7	121.3	activation
ANAPC7	CCNB2	-3.21	ubiquination
ANAPC7	CDH1	-109.95	activation
APH1A	NOTCH2	17.35	activation
APH1A	NOTCH4	72.74	activation
ARAF	MAP2K1	2.66	activation(phosphorylation)
ARNT	EPAS1	-1668.81	binding/association
ARNT	HIF1A	636.33	binding/association
ATF4	EP300	33.55	inhibition
ATM	CHEK2	16.44	activation(phosphorylation)
ATM	TP53	-2.34	activation(phosphorylation)
BMPR1A	SMAD1	6.19	phosphorylation
BMPR1A	SMAD9	20.31	phosphorylation
BMPR1B	SMAD9	0.05	phosphorylation
BUB3	ANAPC5	0.9	inhibition
BUB3	ANAPC7	-0.06	inhibition
CALM1	CAMK2D	14.85	activation
CALM1	CAMK2G	-86.6	activation
CALM1	HRAS	3.07	activation
CALM1	MYLK	15.5	activation
CALM1	NRAS	-60.92	activation
CALM1	PPP3CA	-75.53	activation
CALM1	PPP3CC	198.38	activation
CALM1	PYGM	6.96	activation(phosphorylation)
CAMK2D	ATF4	19.53	activation(indirect effect)
CAMK2D	CALM1	-1.47921e+07	binding/association
CAMK2D	HRAS	-28.44	activation(indirect effect)
CAMK2D	MAPK1	-312.07	indirect effect
CAMK2D	MAPK3	1.47922e+07	indirect effect
CAMK2D	NRAS	8.18	activation(indirect effect)
CAMK2G	ATF4	-10.42	activation(indirect effect)
CAMK2G	CALM1	-2.96455e+06	binding/association
CAMK2G	HRAS	0.75	activation(indirect effect)
CAMK2G	MAPK1	972.68	indirect effect
CAMK2G	MAPK3	2.96444e+06	indirect effect
CAMK2G	NRAS	31.31	activation(indirect effect)
CCNA1	E2F1	3.79	inhibition(phosphorylation)
CCND2	RBL1	5083.91	inhibition(phosphorylation)
CCR5	JAK2	2.99	activation
CD14	TAB1	10.12	indirect effect
CDC20	ANAPC5	0.54	activation
CDC20	ANAPC7	-3.61	activation
CDC20	CDH1	3.4	activation
CDH1	CCNB2	197.88	ubiquination
CDH1	CDH1	53.33	activation
CDK2	CDKN1B	-4.44	inhibition(phosphorylation)
CDK2	E2F1	59.6	inhibition(phosphorylation)
CDK4	RBL1	1118.71	inhibition(phosphorylation)
CDKN1A	CCNA1	-4.45	inhibition
CDKN1A	CCND2	1.68505e+10	inhibition
CDKN1A	CDK2	18.01	inhibition
CDKN1A	CDK4	-1.68505e+10	inhibition
CDKN1A	LIMK2	-9.47	activation(phosphorylation)
CDKN1A	MAP2K1	-18.64	phosphorylation
CDKN1A	MYLK	23.18	inhibition(phosphorylation)
CDKN1B	CCNA1	-114.4	inhibition
CDKN1B	CCND2	2.27341e+11	inhibition
CDKN1B	CDK2	286.91	inhibition
CDKN1B	CDK4	-2.27341e+11	inhibition
CHEK2	CDC25C	16.19	inhibition(phosphorylation)
CHEK2	TP53	3.41	activation(phosphorylation)
CLDN5	CLDN5	-76.09	binding/association
CLDN5	TJP1	376.15	binding/association
COL11A1	ITGA2B	10.85	activation
COL11A1	ITGA5	-2.34	activation
COL11A1	ITGA6	-1.84	activation
COL11A1	ITGA9	16.07	activation
COL11A1	ITGAV	0.61	activation
COL11A1	ITGB1	18.75	activation
COL11A1	ITGB3	-15.37	activation
COL11A1	ITGB5	2.04	activation
COL11A1	ITGB6	-16.95	activation
COL1A2	ITGA2B	-558.4	activation
COL1A2	ITGA5	14.43	activation
COL1A2	ITGA6	-149.91	activation
COL1A2	ITGA9	-44.93	activation
COL1A2	ITGAV	191.73	activation
COL1A2	ITGB1	227.87	activation
COL1A2	ITGB3	435.77	activation
COL1A2	ITGB5	-1274.06	activation
COL1A2	ITGB6	405.54	activation
COL5A1	ITGA2B	-13.47	activation
COL5A1	ITGA5	16.88	activation
COL5A1	ITGA6	-2.39	activation
COL5A1	ITGA9	-17.25	activation
COL5A1	ITGAV	4.59	activation
COL5A1	ITGB1	0.5	activation
COL5A1	ITGB3	15.59	activation
COL5A1	ITGB5	-34.1	activation
COL5A1	ITGB6	22.28	activation
COL5A3	ITGA2B	-79.19	activation
COL5A3	ITGA5	-8	activation
COL5A3	ITGA6	-0.36	activation
COL5A3	ITGA9	3.49	activation
COL5A3	ITGAV	23.69	activation
COL5A3	ITGB1	-9.62	activation
COL5A3	ITGB3	31.63	activation
COL5A3	ITGB5	-92.05	activation
COL5A3	ITGB6	113.41	activation
COL6A1	ITGA2B	43.02	activation
COL6A1	ITGA5	-34.83	activation
COL6A1	ITGA6	17.82	activation
COL6A1	ITGA9	-42.8	activation
COL6A1	ITGAV	-22.17	activation
COL6A1	ITGB1	44.41	activation
COL6A1	ITGB3	-15.73	activation
COL6A1	ITGB5	73.42	activation
COL6A1	ITGB6	-6.31	activation
CPT1B	ACSL4	0.06	compound
CREB1	EP300	3.67	inhibition
CRK	PIK3CG	-48.82	activation
CRK	PIK3R5	-69.62	activation
CRK	RHOQ	93.28	activation
CRKL	PIK3CG	69.05	activation
CRKL	PIK3R5	64.37	activation
CRKL	RHOQ	-10.33	activation
CTNNA1	ACTN1	-175.77	binding/association
CTNNA1	ACTN2	175.84	binding/association
CTNNA1	TJP1	1.45	binding/association
CTNNA1	VCL	-0.61	binding/association
CX3CR1	JAK2	35.39	activation
CXCL12	CCR5	0.19	activation(binding/association)
CXCL12	CX3CR1	0.14	activation(binding/association)
CXCL12	CXCR4	-0.2	activation(binding/association)
CXCL16	CCR5	0.17	activation(binding/association)
CXCL16	CX3CR1	0.1	activation(binding/association)
CXCL16	CXCR4	-0.11	activation(binding/association)
CXCR4	JAK2	17.62	activation
DCN	TGFB1	1.45	inhibition
DCN	TGFB2	-11.41	inhibition
DCN	TGFB3	14.96	inhibition
EGF	FGFR2	12.15	activation
EGF	FLT1	-43.46	activation
EGF	KDR	10.79	activation
EGF	MET	333.15	activation
EP300	ATF4	-2.56	binding/association
EP300	EPAS1	-53.2	binding/association
EP300	HIF1A	-8.53	binding/association
EP300	LEF1	0.88	binding/association
EP300	RBPJ	44.12	activation
EP300	STAT1	-0.56	binding/association
EP300	STAT2	10.49	binding/association
EP300	STAT3	-1.49	binding/association
EP300	TCF7L2	10.98	binding/association
EP300	TP53	8.68	activation
EPAS1	FIGF	1.25	expression
EPAS1	PGF	0.52	expression
EPAS1	SLC2A1	-0.49	expression
EPAS1	TGFB1	-0.29	expression
EPAS1	TGFB2	0.55	expression
EPAS1	TGFB3	0.4	expression
EPOR	JAK1	5.52	phosphorylation
EPOR	JAK2	-1.63	phosphorylation
EPOR	TYK2	-2.15	phosphorylation
FGF1	FGFR2	0.08	activation
FGF1	MET	-0.07	activation
FGF6	FGFR2	0.07	activation
FGF6	MET	-0.03	activation
FGF9	FGFR2	-0.1	activation
FGF9	MET	0.74	activation
FGFR2	PIK3CG	34.44	activation
FGFR2	PIK3R5	-1.15	activation
FIGF	FLT1	7.3	activation
FIGF	KDR	-0.21	activation
FIGF	MET	2.61	activation
FLNB	ITGA2B	-430.37	binding/association
FLNB	ITGA5	-555.59	binding/association
FLNB	ITGA6	886.24	binding/association
FLNB	ITGA9	-661.51	binding/association
FLNB	ITGAV	-1076.54	binding/association
FLNB	ITGB1	1630.85	binding/association
FLNB	ITGB3	1343.43	binding/association
FLNB	ITGB5	2415.88	binding/association
FLNB	ITGB6	-1020.95	binding/association
FLNC	ITGA2B	2.41	binding/association
FLNC	ITGA5	1.11	binding/association
FLNC	ITGA6	1.26	binding/association
FLNC	ITGA9	-5.03	binding/association
FLNC	ITGAV	-1.42	binding/association
FLNC	ITGB1	2.12	binding/association
FLNC	ITGB3	0.71	binding/association
FLNC	ITGB5	-0.77	binding/association
FLNC	ITGB6	1.18	binding/association
FLT1	PIK3CG	4.88	activation
FLT1	PIK3R5	-9.87	activation
FLT1	PTK2	-0.33	activation
FLT1	SHC1	1.58	activation
FN1	ITGA2B	518.66	activation
FN1	ITGA5	56.74	activation
FN1	ITGA6	371.29	activation
FN1	ITGA9	719.38	activation
FN1	ITGAV	-524.48	activation
FN1	ITGB1	-10.65	activation
FN1	ITGB3	129.07	activation
FN1	ITGB5	6.45	activation
FN1	ITGB6	-1201.05	activation
FOXO1	PPARGC1A	0.1	dissociation
FZD3	PLCB4	5.36	indirect effect
FZD6	PLCB4	78.62	indirect effect
GADD45A	CCNB2	-2.1	inhibition
GADD45A	MAP3K4	39.3	activation
GADD45G	CCNB2	0.26	inhibition
GADD45G	MAP3K4	-0.05	activation
GHR	JAK1	24.52	phosphorylation
GHR	JAK2	-12.37	phosphorylation
GHR	TYK2	0.18	phosphorylation
GRK5	CCR5	1.13	phosphorylation
GRK5	CX3CR1	0.49	phosphorylation
GRK5	CXCR4	-0.29	phosphorylation
GRK7	CCR5	-2.32	phosphorylation
GRK7	CX3CR1	6.2	phosphorylation
GRK7	CXCR4	-1.94	phosphorylation
GSK3B	ATF4	126.77	inhibition(phosphorylation)
GSK3B	CCND2	-2.95932e+09	inhibition(phosphorylation)
GSK3B	CREB1	25.04	inhibition(phosphorylation)
GSK3B	GYS1	5.91859e+09	inhibition(phosphorylation)
GSK3B	NFATC3	-2.95927e+09	inhibition(phosphorylation)
GSK3B	NFATC4	-67.5	inhibition(phosphorylation)
HDAC2	RBPJ	46.03	inhibition
HIF1A	FIGF	-11.84	expression
HIF1A	PGF	-9.87	expression
HIF1A	SLC2A1	11.22	expression
HIF1A	TGFB1	14.54	expression
HIF1A	TGFB2	-6.97	expression
HIF1A	TGFB3	-1.03	expression
HRAS	ARAF	213.73	activation
HRAS	FOS	-532.92	indirect effect
HRAS	JUN	217.61	indirect effect
HRAS	MAPK1	3286.23	indirect effect
HRAS	MAPK12	-2.59286e+10	activation(phosphorylation)(indirect effect)
HRAS	MAPK13	-228.18	activation(phosphorylation)(indirect effect)
HRAS	MAPK3	2.59286e+10	indirect effect
HRAS	PIK3CG	-682.29	activation
HRAS	PIK3R5	1972.35	activation
HSPA1A	MAPK8	3.44	inhibition
HSPA6	MAPK8	1.86	inhibition
IGF1	FGFR2	-0.59	activation
IGF1	FLT1	6.95	activation
IGF1	KDR	1.25	activation
IGF1	MAPK1	-169.11	indirect effect
IGF1	MAPK3	20.11	indirect effect
IGF1	MET	1.48	activation
IGF1	PIK3CG	-6.89	indirect effect
IGF1	PIK3R5	-1.89	indirect effect
IGFBP3	IGF1	8.95	inhibition
IKBKB	NFKB1	0.7	activation
IKBKB	RELA	3.68	activation
IKBKG	NFKB1	0.56	activation
IKBKG	RELA	0.25	activation
IL21R	JAK1	0.43	phosphorylation
IL21R	JAK2	0.85	phosphorylation
IL21R	TYK2	-0.59	phosphorylation
INSR	SHC1	9	activation(phosphorylation)
ITGA2B	CRK	17134.2	activation
ITGA2B	CRKL	24.96	activation
ITGA2B	PTK2	-17136.9	activation
ITGA5	CRK	367.69	activation
ITGA5	CRKL	0.6	activation
ITGA5	PTK2	-367.81	activation
ITGA6	CRK	7451.44	activation
ITGA6	CRKL	-0.01	activation
ITGA6	PTK2	-7442.3	activation
ITGA9	CRK	2181.49	activation
ITGA9	CRKL	4.66	activation
ITGA9	PTK2	-2177.41	activation
ITGA9	VCAM1	-3.36	activation
ITGAV	CRK	-25539.2	activation
ITGAV	CRKL	77.58	activation
ITGAV	PTK2	25530.8	activation
ITGB1	CAV1	0.19	binding/association
ITGB1	CAV2	954.96	binding/association
ITGB1	CRK	-52.75	activation
ITGB1	CRKL	-4.81	activation
ITGB1	PRKCB	-1307.7	binding/association
ITGB1	PTK2	94.68	activation
ITGB1	SRC	10.72	activation
ITGB1	VCAM1	-1.82	activation
ITGB3	CAV1	-3.46	binding/association
ITGB3	CAV2	-6139.16	binding/association
ITGB3	CRK	20610.2	activation
ITGB3	CRKL	-10.39	activation
ITGB3	PRKCB	9282.49	binding/association
ITGB3	PTK2	-20979.5	activation
ITGB3	SRC	36.88	activation
ITGB5	CAV1	0.61	binding/association
ITGB5	CAV2	157.45	binding/association
ITGB5	CRK	-1620.22	activation
ITGB5	CRKL	-0.64	activation
ITGB5	PRKCB	-232.58	binding/association
ITGB5	PTK2	1628.55	activation
ITGB5	SRC	1.38	activation
ITGB6	CAV1	-2.96	binding/association
ITGB6	CAV2	992.78	binding/association
ITGB6	CRK	6570.16	activation
ITGB6	CRKL	-5.04	activation
ITGB6	PRKCB	-1412.53	binding/association
ITGB6	PTK2	-6520.28	activation
ITGB6	SRC	14.55	activation
JAG1	NOTCH2	54.28	inhibition
JAG1	NOTCH4	55.67	inhibition
JAK1	PIK3CG	46.18	phosphorylation
JAK1	PIK3R5	154.29	phosphorylation
JAK1	STAT1	-9.22	activation(phosphorylation)
JAK1	STAT2	13.07	phosphorylation
JAK1	STAT3	-20.47	activation(phosphorylation)
JAK2	PIK3CG	15.9	phosphorylation
JAK2	PIK3R5	27.05	phosphorylation
JAK2	STAT1	1.05	activation(phosphorylation)
JAK2	STAT2	2.37	activation(phosphorylation)
JAK2	STAT3	-5.55	activation(phosphorylation)
JUN	CCND2	33.26	expression
JUP	LEF1	15.03	binding/association
JUP	TCF7L2	6.72	binding/association
KDR	PIK3CG	-7.05	activation
KDR	PIK3R5	-9.88	activation
KDR	PTK2	-2.34	activation
KDR	SHC1	11.57	activation
KIT	PIK3CG	116.82	activation
KIT	PIK3R5	108.14	activation
KIT	STAT3	-21.49	activation
LAMB1	DAG1	-16.68	activation
LAMB1	ITGA2B	-10.15	activation
LAMB1	ITGA5	0.73	activation
LAMB1	ITGA6	-7.06	activation
LAMB1	ITGA9	-0.81	activation
LAMB1	ITGAV	11.71	activation
LAMB1	ITGB1	-6.45	activation
LAMB1	ITGB3	10.88	activation
LAMB1	ITGB5	-43.22	activation
LAMB1	ITGB6	45	activation
LEF1	CCND2	1.15	expression
LEF1	JUN	-0.91	expression
LIMK2	CFL2	2.49	inhibition(phosphorylation)
MAGI3	PTEN	13.62	activation
MAP2K1	MAPK1	82	activation(phosphorylation)
MAP2K1	MAPK3	-8.79	activation(phosphorylation)
MAP2K1	MAPK8	0.46	activation(phosphorylation)
MAP2K1	PIK3CG	-5.81	activation(phosphorylation)
MAP2K6	MAPK12	3.26	activation(phosphorylation)
MAP2K6	MAPK13	-1.49	activation(phosphorylation)
MAP3K4	MAP2K6	7.33	activation(phosphorylation)
MAP3K7	IKBKB	3.09	activation(phosphorylation)
MAP3K7	IKBKG	-0.36	activation(phosphorylation)
MAP3K7	MAP2K6	-1.7	phosphorylation
MAPK1	CDK4	-1.36	expression
MAPK1	PLA2G3	8.35	phosphorylation
MAPK1	STMN1	0.36	phosphorylation
MAPK12	FOS	12.12	activation
MAPK12	JUN	48.41	activation
MAPK12	MAPKAPK5	2.56236e+06	phosphorylation
MAPK12	MEF2C	-14.85	phosphorylation
MAPK12	NFATC3	-2.56247e+06	activation(indirect effect)
MAPK12	NFATC4	-506.81	activation(indirect effect)
MAPK12	RPS6KA5	699.96	phosphorylation
MAPK12	TP53	-43.44	phosphorylation
MAPK13	FOS	-1	activation
MAPK13	JUN	-0.37	activation
MAPK13	MAPKAPK5	-22684.4	phosphorylation
MAPK13	MEF2C	0.17	phosphorylation
MAPK13	NFATC3	22687.2	activation(indirect effect)
MAPK13	NFATC4	6.36	activation(indirect effect)
MAPK13	RPS6KA5	-4.85	phosphorylation
MAPK13	TP53	-1.39	phosphorylation
MAPK3	CDK4	-728.56	expression
MAPK3	FOS	72.4	activation(phosphorylation)
MAPK3	HRAS	-10.7	inhibition(phosphorylation)
MAPK3	JMJD7-PLA2G4B	-1.47	phosphorylation
MAPK3	JUN	-13.15	activation(phosphorylation)
MAPK3	NRAS	24.68	inhibition(phosphorylation)
MAPK3	PLA2G3	-74.12	phosphorylation
MAPK3	PLA2G6	104.61	phosphorylation
MAPK3	RPS6KA5	-261.18	activation(phosphorylation)
MAPK3	SMAD1	13.22	inhibition(phosphorylation)
MAPK3	SMAD3	77.48	inhibition(phosphorylation)
MAPK3	SMAD4	7.25	inhibition(phosphorylation)
MAPK3	SMAD9	4.92	inhibition(phosphorylation)
MAPK3	STMN1	800.89	phosphorylation
MAPK8	CRK	-0.59	binding/association
MAPK8	CRKL	3.23	binding/association
MAPK8	FOS	-2.34	phosphorylation
MAPK8	JUN	-1.81	activation(phosphorylation)
MAPK8	NFATC4	1.95	inhibition(phosphorylation)
MAPK8	TP53	3.37	activation
MET	HRAS	-0.43	activation
MET	NRAS	-0.1	activation
MET	PIK3CG	5.01	activation
MET	PIK3R5	-4.98	activation
MET	PTK2	0.52	activation
MET	SHC1	0.15	activation
MMP14	MMP2	12.66	binding/association
MSN	ICAM1	6.72	binding/association
MYLK	MYL2	-0.11	activation(phosphorylation)
MYLK	MYLPF	1.57	activation(phosphorylation)
NCOR2	RBPJ	202.47	inhibition
NCSTN	NOTCH2	42.57	activation
NCSTN	NOTCH4	5.28	activation
NFKB1	FIGF	-0.84	expression
NFKB1	PGF	1.57	expression
NFKB1	TRAF6	4.12	expression
NOTCH2	RBPJ	10.84	activation
NOTCH4	RBPJ	46.52	activation
NRAS	ARAF	19.37	activation
NRAS	FOS	-1.67	indirect effect
NRAS	JUN	-4.91	indirect effect
NRAS	MAPK1	-321.78	indirect effect
NRAS	MAPK12	1.10798e+09	activation(phosphorylation)(indirect effect)
NRAS	MAPK13	19.98	activation(phosphorylation)(indirect effect)
NRAS	MAPK3	-1.10798e+09	indirect effect
NRAS	PIK3CG	80.68	activation
NRAS	PIK3R5	80.62	activation
PGF	FLT1	0.12	activation
PGF	KDR	0.39	activation
PGF	MET	4.83	activation
PIK3CG	HRAS	0.27	activation(indirect effect)
PIK3CG	ILK	-3.92	compound
PIK3CG	NRAS	0.37	activation(indirect effect)
PIK3CG	PTK2	0.1	activation(phosphorylation)
PIK3R5	HRAS	0.15	activation(indirect effect)
PIK3R5	ILK	-2.11	compound
PIK3R5	NRAS	0.15	activation(indirect effect)
PIK3R5	PTK2	0.05	activation(phosphorylation)
PLCB4	CAMK2D	-0.06	compound
PLCB4	CAMK2G	-1.67	compound
PLCB4	PPP3CA	-0.06	compound
PLCB4	PPP3CC	-2.52	compound
PLCB4	PRKCB	37.03	compound
PPARA	ACADM	-0.15	inhibition
PPARA	ACSL4	-0.52	expression
PPARA	ANGPTL4	1.01	expression
PPARA	CPT1B	0.32	expression
PPARA	SCD	-0.36	expression
PPARG	ACSL4	0.41	expression
PPARG	ANGPTL4	1.24	expression
PPARG	CD36	-0.61	expression
PPARG	CPT1B	-3.82	expression
PPARG	CYP27A1	0.2	expression
PPARG	SCD	-0.57	expression
PPARG	SORBS1	0.09	expression
PPM1A	MAP2K6	129.83	expression
PPP1CA	CALM1	2.44736e+06	inhibition(dephosphorylation)
PPP1CA	CAMK2D	2.74	inhibition(dephosphorylation)
PPP1CA	CAMK2G	18.76	inhibition
PPP1CA	GYS1	-2.44736e+06	inhibition
PPP1CA	MYL2	10.23	activation(dephosphorylation)
PPP1CA	MYLPF	8.29	inhibition(dephosphorylation)
PPP1CB	CALM1	-1.36078e+08	inhibition(dephosphorylation)
PPP1CB	CAMK2D	143.78	inhibition(dephosphorylation)
PPP1CB	CAMK2G	39.44	inhibition
PPP1CB	GYS1	1.36078e+08	inhibition
PPP1CB	MYL2	87.45	activation(dephosphorylation)
PPP1CB	MYLPF	70.25	inhibition(dephosphorylation)
PPP1R12A	CAMK2D	3.39	inhibition(dephosphorylation)
PPP1R12A	CAMK2G	-7.49	inhibition
PPP1R12A	MYL2	52.97	inhibition
PPP1R12A	MYLPF	10.18	inhibition(dephosphorylation)
PPP1R3C	CALM1	-3.29241e+07	inhibition(dephosphorylation)
PPP1R3C	GYS1	3.29242e+07	inhibition(dephosphorylation)
PPP3CA	CALM1	-6.11992e+06	activation(dephosphorylation)
PPP3CA	NFATC3	6.11992e+06	binding/association
PPP3CA	NFATC4	-0.06	activation(dephosphorylation)
PPP3CC	CALM1	-1.1166e+08	activation(dephosphorylation)
PPP3CC	NFATC3	1.1166e+08	binding/association
PPP3CC	NFATC4	-19.77	activation(dephosphorylation)
PRKAA2	ACACB	23.54	activation(dephosphorylation)
PRKAA2	SLC2A1	-20.33	inhibition(phosphorylation)
PRKAA2	SLC2A4	-1.23	activation(indirect effect)
PRKAG3	ACACB	-14.83	activation(indirect effect)
PRKAG3	SLC2A1	2.59	inhibition(phosphorylation)
PRKAG3	SLC2A4	18.01	activation(indirect effect)
PRKCB	ARAF	0.02	activation(indirect effect)
PRKCB	MMP14	-0.01	indirect effect
PRKCB	NRAS	-0.02	indirect effect
PRKCB	PLA2G3	12.35	activation(indirect effect)
PRKCB	PTK2	-1.48	indirect effect
PRKCB	SRC	0.02	activation(phosphorylation)
PRKCH	ARAF	16	phosphorylation
PRKCH	TJP1	19.77	activation
PTEN	PTK2	26.11	phosphorylation
PTK2	MAPK1	691.82	inhibition(dephosphorylation)
PTK2	MAPK3	-103.85	indirect effect
PTK2	PIK3CG	105.28	indirect effect
PTK2	PIK3R5	139.96	activation
PTK2	SHC1	2.35	activation
PTK2	SRC	25.09	activation(phosphorylation)
PTPRR	MAPK1	210.05	phosphorylation
PTPRR	MAPK12	1.89934e+07	inhibition(dephosphorylation)
PTPRR	MAPK13	0.38	inhibition(dephosphorylation)
PTPRR	MAPK3	-1.89934e+07	inhibition(dephosphorylation)
PTPRR	MAPK8	-0.04	inhibition(dephosphorylation)
PVRL1	PVRL1	7.25	inhibition(dephosphorylation)
PVRL1	PVRL2	-7.26	activation
PVRL1	SRC	0.02	binding/association
PVRL2	PVRL1	-0.37	indirect effect
PVRL2	PVRL2	0.37	binding/association
PVRL2	SRC	0.02	binding/association
RAP1A	ARAF	100.26	activation
RAP1A	ITGB1	107.6	activation
RAP1A	MAPK8	-37.56	activation
RASA2	HRAS	0.67	activation
RASA2	NRAS	0.12	inhibition
RBL1	E2F5	0.07	inhibition
RELA	FIGF	-2.98	dissociation
RELA	PGF	24.76	expression
RELA	TRAF6	18.02	expression
RPS6KA5	ATF4	12.22	expression
RUNX1T1	JUP	2.24	activation(phosphorylation)
RUNX1T1	SPI1	16.07	expression
SFN	CCNB2	0.36	inhibition
SFRP1	FZD3	0.33	inhibition
SFRP1	FZD6	1.57	inhibition
SFRP1	WNT10B	-3.71	inhibition
SFRP4	FZD3	12.39	inhibition
SFRP4	FZD6	-10.67	inhibition
SFRP4	WNT10B	141.51	inhibition
SH3GL3	FGFR2	4.83	inhibition
SH3GL3	FLT1	-9.35	binding/association
SH3GL3	KDR	-12.82	binding/association
SH3GL3	KIT	-3.07	binding/association
SH3GL3	MET	12.62	binding/association
SH3GL3	TGFBR1	38.06	binding/association
SH3GLB2	FGFR2	12.67	binding/association
SH3GLB2	FLT1	-79.27	binding/association
SH3GLB2	KDR	-28.99	binding/association
SH3GLB2	KIT	10.13	binding/association
SH3GLB2	MET	25.65	binding/association
SH3GLB2	TGFBR1	101.7	binding/association
SLC9A1	MSN	0.22	binding/association
SMAD1	ID1	9.63	activation
SMAD1	ID2	12.49	expression
SMAD1	ID4	-38.24	expression
SMAD1	SMAD4	3.48	expression
SMAD3	CDKN1A	1.4	activation
SMAD3	E2F5	2.92	expression
SMAD3	EP300	4.05	activation
SMAD3	RBL1	4.18	activation
SMAD3	SMAD4	0.91	activation
SMAD3	SP1	-6.16	activation
SMAD4	CDKN1A	-13.59	activation
SMAD4	E2F5	-7.61	expression
SMAD4	EP300	-16.86	activation
SMAD4	ID1	-7.04	activation
SMAD4	ID2	-18.44	expression
SMAD4	ID4	-33.99	expression
SMAD4	LEF1	37.93	expression
SMAD4	RBL1	66.21	activation
SMAD4	SMAD3	12.29	activation
SMAD4	SP1	25.06	binding/association
SMAD4	TCF7L2	39.56	activation
SMAD6	SMAD1	0.55	activation
SMAD6	SMAD3	0.37	inhibition
SMAD6	SMAD9	0.86	inhibition
SMAD9	ID1	0.42	inhibition
SMAD9	ID2	1.3	expression
SMAD9	ID4	-1.66	expression
SMAD9	SMAD4	-0.26	expression
SOX17	LEF1	7.77	activation
SOX17	TCF7L2	4.34	inhibition
SRC	HRAS	5.15	inhibition
SRC	NRAS	12.49	indirect effect
SRC	PTK2	-7.57	indirect effect
SREBF1	ACACB	13.27	activation(phosphorylation)
SREBF1	FAS	8.4	activation(indirect effect)
SRF	FOS	74.1	activation(indirect effect)
STAT1	CCND2	3.29	expression
STAT1	FIGF	-12.04	expression
STAT1	PGF	19.51	expression
STAT2	CCND2	2.16	expression
STAT3	CCND2	161.15	expression
STAT3	CPT1B	-175.49	expression
STAT3	FIGF	-6.26	expression
STAT3	PGF	-58.68	expression
STAT3	PPARGC1A	11.62	expression
STAT3	PRKAA2	-108.98	repression
STAT3	PRKAG3	8.77	inhibition(indirect effect)
TAB1	MAP3K7	35.12	inhibition(indirect effect)
TCF7L2	CCND2	26.97	phosphorylation
TCF7L2	JUN	-20.64	expression
TGFB1	SMAD3	6.09	expression
TGFB1	TGFBR1	22.68	activation(indirect effect)
TGFB2	SMAD3	-0.48	activation
TGFB2	TGFBR1	1.78	activation(indirect effect)
TGFB3	SMAD3	-1.8	activation
TGFB3	TGFBR1	13.86	activation(indirect effect)
TGFBR1	SMAD3	0.2	activation
TGFBR1	SMAD4	0.9	activation(phosphorylation)
THBS1	CD36	-135.63	activation(phosphorylation)
THBS1	ITGA2B	-52.69	activation
THBS1	ITGA5	-1.23	activation
THBS1	ITGA6	-12.52	activation
THBS1	ITGA9	-10.08	activation
THBS1	ITGAV	27.79	activation
THBS1	ITGB1	15.12	activation
THBS1	ITGB3	157.45	activation
THBS1	ITGB5	-76.92	activation
THBS1	ITGB6	69.53	activation
THBS3	CD36	0.75	activation
THBS3	ITGA2B	-79.89	activation
THBS3	ITGA5	38.55	activation
THBS3	ITGA6	-20.79	activation
THBS3	ITGA9	-30.15	activation
THBS3	ITGAV	28.16	activation
THBS3	ITGB1	22.9	activation
THBS3	ITGB3	60.98	activation
THBS3	ITGB5	-159.58	activation
THBS3	ITGB6	78.35	activation
TJP1	CTNNA1	11.32	activation
TLN2	ITGA2B	36.11	binding/association
TLN2	ITGA5	7.28	binding/association
TLN2	ITGA6	0.03	binding/association
TLN2	ITGA9	5.83	binding/association
TLN2	ITGAV	-1.87	binding/association
TLN2	ITGB1	-12.19	binding/association
TLN2	ITGB3	-15.62	binding/association
TLN2	ITGB5	-3.47	binding/association
TLN2	ITGB6	-11.57	binding/association
TNC	ITGA2B	-118.88	binding/association
TNC	ITGA5	-37.2	activation
TNC	ITGA6	-46.12	activation
TNC	ITGA9	-3.44	activation
TNC	ITGAV	59.47	activation
TNC	ITGB1	72.91	activation
TNC	ITGB3	103	activation
TNC	ITGB5	-385.24	activation
TNC	ITGB6	72.6	activation
TNFRSF1A	TAB1	0.16	activation
TNFRSF1A	TRAF6	0.75	indirect effect
TNXB	ITGA2B	47.5	indirect effect
TNXB	ITGA5	-29.36	activation
TNXB	ITGA6	6.53	activation
TNXB	ITGA9	23.61	activation
TNXB	ITGAV	-10.21	activation
TNXB	ITGB1	9.94	activation
TNXB	ITGB3	-43.37	activation
TNXB	ITGB5	104.18	activation
TNXB	ITGB6	4.47	activation
TP53	CCNG1	-3.79	activation
TP53	CDKN1A	8.7	expression
TP53	FAS	180.89	expression
TP53	GADD45A	-31.11	expression
TP53	GADD45G	-47.79	expression
TP53	IGFBP3	18.94	expression
TP53	PTEN	-5.14	expression
TP53	SERPINE1	62.57	expression
TP53	SFN	99.34	expression
TP53	SHISA5	-6.79	expression
TP53	THBS1	-1.4	expression
TPM3	HRAS	-163.05	expression
TPM3	NRAS	663.44	indirect effect
TRAF6	FGFR2	-0.55	indirect effect
TRAF6	FLT1	1.22	ubiquination
TRAF6	IKBKB	0.25	ubiquination
TRAF6	KDR	-0.12	activation(indirect effect)
TRAF6	KIT	-0.36	ubiquination
TRAF6	MAP3K7	0.37	ubiquination
TRAF6	MAPK8	0.2	activation
TRAF6	MET	-0.68	activation
TRAF6	TGFBR1	1.67	ubiquination
TYK2	PIK3CG	79.19	compound
TYK2	PIK3R5	412.81	phosphorylation
TYK2	STAT1	-53.7	phosphorylation
TYK2	STAT2	40.33	phosphorylation
TYK2	STAT3	-17.28	phosphorylation
VCAM1	ITGB1	31.64	phosphorylation
VCAM1	MSN	42.24	binding/association
VCAM1	PIK3CG	290.52	binding/association
VCAM1	PIK3R5	-287.67	indirect effect
VCL	ACTN1	7947.25	indirect effect
VCL	ACTN2	-7944.02	binding/association
VCL	SORBS1	20.42	binding/association
VCL	TLN2	7.19	binding/association
VTN	ITGA2B	1.4	binding/association
VTN	ITGA5	0.62	activation
VTN	ITGA6	-0.13	activation
VTN	ITGA9	2.65	activation
VTN	ITGAV	-0.01	activation
VTN	ITGB1	0.42	activation
VTN	ITGB3	-2.68	activation
VTN	ITGB5	3.94	activation
VTN	ITGB6	-1.75	activation
WNT10B	FZD3	1.04	activation
WNT10B	FZD6	0.22	activation
WWP1	FGFR2	76.29	activation
WWP1	FLT1	276.39	ubiquination
WWP1	KDR	5.75	ubiquination
WWP1	KIT	136.57	ubiquination
WWP1	MET	438.97	ubiquination
WWP1	TGFBR1	-697.79	ubiquination
YWHAH	CDC25C	118.93	ubiquination
YWHAZ	CDC25C	148.06	binding/association
ZAK	TJP1	14.93	binding/association
CDKN1A	ACACB	-255.64	new
CDKN1A	ACADM	-75.98	new
CDKN1A	ACSL4	-2309.49	new
CDKN1A	ACTN1	-2156.1	new
CDKN1A	ACTN2	1277.07	new
CDKN1A	ACVR1	380.49	new
CDKN1A	ADAM17	-308.36	new
CDKN1B	ACACB	8488.26	new
CDKN1B	ACADM	14321.5	new
CDKN1B	ACSL4	11462.8	new
CDKN1B	ACTN1	9769.9	new
GSK3B	ACACB	-12.33	new
GSK3B	ACADM	0.38	new
GSK3B	ACSL4	2.79	new
GSK3B	ACTN1	-12.94	new
GSK3B	ACTN2	-1.32	new
HRAS	ACACB	31.31	new
HRAS	ACADM	15.26	new
HRAS	ACSL4	3.49	new
HRAS	ACTN1	4.11	new
HRAS	ACTN2	-0.92	new
HRAS	ACVR1	27	new
HRAS	ADAM17	-1.72	new
HRAS	ADRBK1	-3.22	new
NRAS	ACACB	-1.34	new
NRAS	ACADM	-0.65	new
NRAS	ACSL4	-0.15	new
NRAS	ACTN1	-0.18	new
NRAS	ACTN2	0.04	new
NRAS	ACVR1	-1.15	new
NRAS	ADAM17	0.07	new
NRAS	ADRBK1	0.14	new
PPP1CB	ACACB	0.02	new
PTPRR	ACACB	-0.09	new
PTPRR	ACADM	0.05	new
PTPRR	ACSL4	-0.11	new
PTPRR	ACTN1	0.05	new

## Sheet: Lantang-signal-flow
Gene1	Gene2	relation weight	interaction
ACACB	CPT1B	36.51	compound
ACTN1	ITGA2B	2.68	binding/association
ACTN1	ITGA5	-4.29	binding/association
ACTN1	ITGA6	-54.32	binding/association
ACTN1	ITGA9	0.74	binding/association
ACTN1	ITGAV	-8.1	binding/association
ACTN1	ITGB1	-699.36	binding/association
ACTN1	ITGB3	68.12	binding/association
ACTN1	ITGB5	723.76	binding/association
ACTN1	ITGB6	101.97	binding/association
ACTN1	ITGB8	-371.6	binding/association
ACTN1	MAGI3	25.58	binding/association
ACTN2	ITGA2B	1019.45	binding/association
ACTN2	ITGA5	1017.59	binding/association
ACTN2	ITGA6	31.18	binding/association
ACTN2	ITGA9	177.4	binding/association
ACTN2	ITGAV	-894.55	binding/association
ACTN2	ITGB1	35486.5	binding/association
ACTN2	ITGB3	-703.85	binding/association
ACTN2	ITGB5	-38678.4	binding/association
ACTN2	ITGB6	-126.45	binding/association
ACTN2	ITGB8	20016.2	binding/association
ACTN2	MAGI3	910.22	binding/association
ACVR1	SMAD3	54.96	phosphorylation
ADAM17	NOTCH2	2.19	activation
ADAM17	NOTCH4	0.19	activation
ADRBK1	CCR5	9.31	phosphorylation
ADRBK1	CX3CR1	-1.08	phosphorylation
ADRBK1	CXCR4	86.96	phosphorylation
ADRBK2	CCR5	5.38	phosphorylation
ADRBK2	CX3CR1	-3.68	phosphorylation
ADRBK2	CXCR4	10.16	phosphorylation
ANAPC5	ANAPC5	18.33	activation
ANAPC5	ANAPC7	-10.82	activation
ANAPC5	CCNB2	15.35	ubiquination
ANAPC5	CDH1	-8.78	activation
ANAPC7	ANAPC5	-2.83	activation
ANAPC7	ANAPC7	5.08	activation
ANAPC7	CCNB2	35.42	ubiquination
ANAPC7	CDH1	11.04	activation
APH1A	NOTCH2	24.62	activation
APH1A	NOTCH4	-1.65	activation
ARAF	MAP2K1	98.84	activation(phosphorylation)
ARNT	EPAS1	0.29	binding/association
ARNT	HIF1A	0.04	binding/association
ATF4	EP300	551.94	inhibition
ATM	CHEK2	27.23	activation(phosphorylation)
ATM	TP53	7.59	activation(phosphorylation)
BMPR1A	SMAD1	22.28	phosphorylation
BMPR1A	SMAD9	58.9	phosphorylation
BMPR1B	SMAD1	3.49	phosphorylation
BMPR1B	SMAD9	27.61	phosphorylation
BUB3	ANAPC5	154.59	inhibition
BUB3	ANAPC7	-121.28	inhibition
CALCRL	GNAS	4.54	activation
CALM1	CAMK2D	-155300	activation
CALM1	CAMK2G	-1711.71	activation
CALM1	HRAS	108.35	activation
CALM1	MYLK	46.99	activation
CALM1	NRAS	-281.02	activation
CALM1	PPP3CA	-29.19	activation
CALM1	PPP3CB	177.43	activation
CALM1	PPP3CC	157313	activation
CALM1	PYGM	-77.9	activation(phosphorylation)
CAMK2D	ATF4	-565783	activation(indirect effect)
CAMK2D	CALM1	-565783	binding/association
CAMK2D	HRAS	25.54	activation(indirect effect)
CAMK2D	MAPK1	10.32	indirect effect
CAMK2D	MAPK3	1.13161e+06	indirect effect
CAMK2D	NRAS	-16.11	activation(indirect effect)
CAMK2G	ATF4	-425647	activation(indirect effect)
CAMK2G	CALM1	-425647	binding/association
CAMK2G	HRAS	-6.14	activation(indirect effect)
CAMK2G	MAPK1	-13.16	indirect effect
CAMK2G	MAPK3	851343	indirect effect
CAMK2G	NRAS	-27.64	activation(indirect effect)
CASP3	STK4	0.76	activation
CCNA1	E2F1	0.07	inhibition(phosphorylation)
CCND2	RBL1	7.43	inhibition(phosphorylation)
CCR5	JAK2	1.3	activation
CD14	TAB1	1.21	indirect effect
CDC20	ANAPC5	14.82	activation
CDC20	ANAPC7	-13.93	activation
CDC20	CDH1	3.91	activation
CDH1	CCNB2	-0.44	ubiquination
CDH1	CDH1	5.27	activation
CDK2	CDKN1B	1.26	inhibition(phosphorylation)
CDK2	E2F1	3.88	inhibition(phosphorylation)
CDK4	RBL1	111.08	inhibition(phosphorylation)
CDKN1A	CCNA1	-710.99	inhibition
CDKN1A	CCND2	207.98	inhibition
CDKN1A	CDK2	-27.08	inhibition
CDKN1A	CDK4	263.01	inhibition
CDKN1A	LIMK2	-226.98	activation(phosphorylation)
CDKN1A	MAP2K1	75.68	phosphorylation
CDKN1A	MYLK	-122.75	inhibition(phosphorylation)
CDKN1B	CCNA1	-174.48	inhibition
CDKN1B	CCND2	15.98	inhibition
CDKN1B	CDK2	6.74	inhibition
CDKN1B	CDK4	34.47	inhibition
CHEK2	CDC25C	18.69	inhibition(phosphorylation)
CHEK2	TP53	0.25	activation(phosphorylation)
CLDN5	CLDN5	5	binding/association
CLDN5	TJP1	19.94	binding/association
COL11A1	ITGA2B	1016.3	activation
COL11A1	ITGA5	74.61	activation
COL11A1	ITGA6	-414.09	activation
COL11A1	ITGA9	-58.02	activation
COL11A1	ITGAV	-291.77	activation
COL11A1	ITGB1	-14693.2	activation
COL11A1	ITGB3	1060.18	activation
COL11A1	ITGB5	14614	activation
COL11A1	ITGB6	-238.19	activation
COL11A1	ITGB8	-7764.27	activation
COL1A2	ITGA2B	137.69	activation
COL1A2	ITGA5	12.82	activation
COL1A2	ITGA6	-10.83	activation
COL1A2	ITGA9	-6.82	activation
COL1A2	ITGAV	-25.92	activation
COL1A2	ITGB1	-1391.29	activation
COL1A2	ITGB3	101.58	activation
COL1A2	ITGB5	1300.47	activation
COL1A2	ITGB6	4.82	activation
COL1A2	ITGB8	-501.77	activation
COL4A6	ITGA2B	1.11	activation
COL4A6	ITGA5	0.03	activation
COL4A6	ITGA6	-0.19	activation
COL4A6	ITGA9	-0.02	activation
COL4A6	ITGAV	-0.15	activation
COL4A6	ITGB1	-7.25	activation
COL4A6	ITGB3	0.47	activation
COL4A6	ITGB5	6.55	activation
COL4A6	ITGB6	-0.21	activation
COL4A6	ITGB8	-3.17	activation
COL5A1	ITGA2B	701.73	activation
COL5A1	ITGA5	95.12	activation
COL5A1	ITGA6	-199.92	activation
COL5A1	ITGA9	-48.85	activation
COL5A1	ITGAV	-254.34	activation
COL5A1	ITGB1	-11946	activation
COL5A1	ITGB3	788.63	activation
COL5A1	ITGB5	11932.6	activation
COL5A1	ITGB6	-279.81	activation
COL5A1	ITGB8	-5540.16	activation
COL5A3	ITGA2B	-7.96	activation
COL5A3	ITGA5	1.53	activation
COL5A3	ITGA6	7.15	activation
COL5A3	ITGA9	-0.23	activation
COL5A3	ITGAV	1.21	activation
COL5A3	ITGB1	36.34	activation
COL5A3	ITGB3	2.19	activation
COL5A3	ITGB5	-23.47	activation
COL5A3	ITGB6	8.35	activation
COL5A3	ITGB8	-71.49	activation
COL6A1	ITGA2B	42.62	activation
COL6A1	ITGA5	11.66	activation
COL6A1	ITGA6	-9.9	activation
COL6A1	ITGA9	1.09	activation
COL6A1	ITGAV	-9.92	activation
COL6A1	ITGB1	631.4	activation
COL6A1	ITGB3	16.57	activation
COL6A1	ITGB5	-721.44	activation
COL6A1	ITGB6	-57.05	activation
COL6A1	ITGB8	543.62	activation
COL6A2	ITGA2B	-0.28	activation
COL6A2	ITGA5	0.03	activation
COL6A2	ITGA6	0.13	activation
COL6A2	ITGA9	-0.02	activation
COL6A2	ITGAV	0.02	activation
COL6A2	ITGB1	-0.12	activation
COL6A2	ITGB3	0.03	activation
COL6A2	ITGB5	-0.93	activation
COL6A2	ITGB6	0.35	activation
COL6A2	ITGB8	10.17	activation
CPT1B	ACSL4	10.2	compound
CREB1	EP300	0.2	inhibition
CRK	PIK3CG	93.97	activation
CRK	RHOQ	-6.49	activation
CRKL	PIK3CG	24.77	activation
CRKL	RHOQ	60.09	activation
CTNNA1	ACTN1	-1931.04	binding/association
CTNNA1	ACTN2	15.77	binding/association
CTNNA1	TJP1	37.06	binding/association
CTNNA1	VCL	1908.64	binding/association
CX3CR1	JAK2	1.66	activation
CXCL12	CCR5	8.74	activation(binding/association)
CXCL12	CX3CR1	34.02	activation(binding/association)
CXCL12	CXCR4	89.68	activation(binding/association)
CXCR4	JAK2	0.4	activation
DCN	TGFB1	720.79	inhibition
DCN	TGFB2	-3189.57	inhibition
DCN	TGFB3	1553.37	inhibition
EGF	FGFR2	608.6	activation
EGF	FLT1	28.69	activation
EGF	KDR	28.12	activation
EGF	MET	-99.01	activation
EP300	ATF4	-3.52	binding/association
EP300	EPAS1	5.83	binding/association
EP300	HIF1A	-30.15	binding/association
EP300	LEF1	30.27	binding/association
EP300	RBPJ	-112.03	activation
EP300	STAT1	105.8	binding/association
EP300	STAT2	-16.5	binding/association
EP300	STAT3	8.7	binding/association
EP300	STAT4	-388.69	binding/association
EP300	TCF7L2	54.64	binding/association
EP300	TP53	19.83	activation
EPAS1	FIGF	9.85	expression
EPAS1	PGF	-27.68	expression
EPAS1	SLC2A1	15.91	expression
EPAS1	TGFB1	16.81	expression
EPAS1	TGFB2	-66.22	expression
EPAS1	TGFB3	-12.95	expression
EPOR	JAK1	-1975.57	phosphorylation
EPOR	JAK2	0.6	phosphorylation
EPOR	TYK2	1975.09	phosphorylation
ERBB4	PIK3CG	0.85	activation
ERBB4	SHC1	-0.01	activation(phosphorylation)
FGF9	FGFR2	-0.65	activation
FGF9	MET	0.25	activation
FGFR2	PIK3CG	0.27	activation
FIGF	FLT1	2.69	activation
FIGF	KDR	6.14	activation
FIGF	MET	10.91	activation
FLNB	ITGA2B	-7.41	binding/association
FLNB	ITGA5	-0.21	binding/association
FLNB	ITGA6	0.48	binding/association
FLNB	ITGA9	0.02	binding/association
FLNB	ITGAV	1.51	binding/association
FLNB	ITGB1	57.3	binding/association
FLNB	ITGB3	-1.49	binding/association
FLNB	ITGB5	-52.24	binding/association
FLNB	ITGB6	-5.53	binding/association
FLNB	ITGB8	31.91	binding/association
FLNC	ITGA2B	2588.96	binding/association
FLNC	ITGA5	1709.05	binding/association
FLNC	ITGA6	-228.11	binding/association
FLNC	ITGA9	328.36	binding/association
FLNC	ITGAV	-2407.64	binding/association
FLNC	ITGB1	58997.6	binding/association
FLNC	ITGB3	-17.25	binding/association
FLNC	ITGB5	-62257	binding/association
FLNC	ITGB6	-3991.47	binding/association
FLNC	ITGB8	21827.1	binding/association
FLT1	PIK3CG	8.53	activation
FLT1	PTK2	-0.08	activation
FLT1	SHC1	-0.2	activation
FN1	ITGA2B	-15.73	activation
FN1	ITGA5	1.1	activation
FN1	ITGA6	5.52	activation
FN1	ITGA9	-0.52	activation
FN1	ITGAV	-1.15	activation
FN1	ITGB1	-129.3	activation
FN1	ITGB3	3.14	activation
FN1	ITGB5	153.33	activation
FN1	ITGB6	2.22	activation
FN1	ITGB8	-85.2	activation
FOS	IL8	287.19	expression
FOXO1	PPARGC1A	2.68	dissociation
FZD3	PLCB4	0.32	indirect effect
FZD6	PLCB4	10.3	indirect effect
GADD45A	CCNB2	-114.51	inhibition
GADD45A	MAP3K4	97.07	activation
GADD45G	CCNB2	-44.36	inhibition
GADD45G	MAP3K4	41.73	activation
GHR	JAK1	-139919	phosphorylation
GHR	JAK2	40.16	phosphorylation
GHR	TYK2	139893	phosphorylation
GNAS	JMJD7-PLA2G4B	65.99	activation
GNAS	PLA2G3	160.89	activation
GNAS	PLA2G6	-29.87	activation
GRIN1	CALM1	0.04	compound
GRIN1	RYR1	0.04	compound
GRIN1	RYR3	-0.09	compound
GRK5	CCR5	-2.48	phosphorylation
GRK5	CX3CR1	9.1	phosphorylation
GRK5	CXCR4	2.08	phosphorylation
GRK7	CCR5	-0.17	phosphorylation
GRK7	CX3CR1	-1	phosphorylation
GRK7	CXCR4	3.38	phosphorylation
GSK3B	ATF4	112730	inhibition(phosphorylation)
GSK3B	CCND2	8.13	inhibition(phosphorylation)
GSK3B	CREB1	-32.94	inhibition(phosphorylation)
GSK3B	GYS1	-225456	inhibition(phosphorylation)
GSK3B	NFATC2	39.81	inhibition(phosphorylation)
GSK3B	NFATC3	112730	inhibition(phosphorylation)
GSK3B	NFATC4	-5.11	inhibition(phosphorylation)
HDAC2	RBPJ	450.93	inhibition
HIF1A	FIGF	7.04	expression
HIF1A	PGF	88.43	expression
HIF1A	SLC2A1	3.54	expression
HIF1A	TGFB1	13.36	expression
HIF1A	TGFB2	-187.68	expression
HIF1A	TGFB3	-2.06	expression
HRAS	ARAF	21121	activation
HRAS	FOS	-3.2	indirect effect
HRAS	JUN	-7.35	indirect effect
HRAS	MAPK1	-3.96	indirect effect
HRAS	MAPK12	-1.25221e+06	activation(phosphorylation)(indirect effect)
HRAS	MAPK13	5.57	activation(phosphorylation)(indirect effect)
HRAS	MAPK14	37.99	activation(phosphorylation)(indirect effect)
HRAS	MAPK3	1.2311e+06	indirect effect
HRAS	PIK3CG	-12.12	activation
HSPA1A	MAPK8	24.49	inhibition
HSPA6	MAPK8	5.86	inhibition
IFNG	SMAD6	0.09	indirect effect
IGF1	FGFR2	1.99	activation
IGF1	FLT1	-1.6	activation
IGF1	KDR	0.39	activation
IGF1	MET	1.01	activation
IGFBP3	IGF1	27.61	inhibition
IKBKB	NFKB1	4.16	activation
IKBKB	RELA	-0.05	activation
IKBKG	NFKB1	8.01	activation
IKBKG	RELA	-1.26	activation
IL21R	JAK1	-3669.82	phosphorylation
IL21R	JAK2	-0.66	phosphorylation
IL21R	TYK2	3670.55	phosphorylation
IL8	CCR5	-0.52	activation(binding/association)
IL8	CX3CR1	-0.62	activation(binding/association)
IL8	CXCR4	2.25	activation(binding/association)
INHBB	ACVR2A	-0.16	activation
INHBB	ACVR2B	-2.31	activation
INHBB	TGFB1	0.5	inhibition
INHBB	TGFB2	0.13	inhibition
INHBB	TGFB3	-0.36	inhibition
INSR	SHC1	0.9	activation(phosphorylation)
ITGA2B	ACACB	-141	new
ITGA2B	ACADM	-109.06	new
ITGA2B	ACSL4	37.32	new
ITGA2B	CRK	0.69	activation
ITGA2B	CRKL	-7.13714e+09	activation
ITGA2B	PTK2	7.13714e+09	activation
ITGA5	ACACB	-1402.9	new
ITGA5	ACADM	-1085.13	new
ITGA5	ACSL4	371.27	new
ITGA5	CRK	50.21	activation
ITGA5	CRKL	-7.10117e+10	activation
ITGA5	PTK2	7.10117e+10	activation
ITGA6	ACACB	55.17	new
ITGA6	ACADM	42.67	new
ITGA6	ACSL4	-14.6	new
ITGA6	CRK	6.95	activation
ITGA6	CRKL	2.79266e+09	activation
ITGA6	PTK2	-2.79266e+09	activation
ITGA9	ACACB	-364.4	new
ITGA9	ACADM	-1014.39	new
ITGA9	ACSL4	-104.78	new
ITGA9	ACTN1	1526.66	new
ITGA9	ACTN2	1.79	new
ITGA9	CRK	12.26	activation
ITGA9	CRKL	-3.9264e+10	activation
ITGA9	PTK2	3.9264e+10	activation
ITGA9	VCAM1	1115.34	activation
ITGAV	ACACB	373.17	new
ITGAV	ACADM	288.65	new
ITGAV	ACSL4	-98.76	new
ITGAV	CRK	11.23	activation
ITGAV	CRKL	1.88892e+10	activation
ITGAV	PTK2	-1.88892e+10	activation
ITGB1	ACACB	-48769.9	new
ITGB1	ACADM	14156.4	new
ITGB1	ACSL4	22889	new
ITGB1	ACTN1	3525.32	new
ITGB1	ACTN2	-999.29	new
ITGB1	ACVR1	-44831.4	new
ITGB1	ACVR2A	3987.84	new
ITGB1	ACVR2B	5020.27	new
ITGB1	CAV1	22.33	binding/association
ITGB1	CAV2	-26.55	binding/association
ITGB1	CRK	-8.78	activation
ITGB1	CRKL	-1.59974e+11	activation
ITGB1	PRKCB	230.61	binding/association
ITGB1	PTK2	1.59974e+11	activation
ITGB1	SRC	232.57	activation
ITGB1	VCAM1	-7437.18	activation
ITGB3	ACACB	788.6	new
ITGB3	ACADM	-1168.18	new
ITGB3	ACSL4	-149.95	new
ITGB3	ACTN1	-2393.81	new
ITGB3	ACTN2	-355.49	new
ITGB3	ACVR1	1021.71	new
ITGB3	ACVR2A	-64.12	new
ITGB3	CAV1	0.83	binding/association
ITGB3	CAV2	-0.97	binding/association
ITGB3	CRK	-0.7	activation
ITGB3	CRKL	-7.61234e+09	activation
ITGB3	PRKCB	4.35	binding/association
ITGB3	PTK2	7.61234e+09	activation
ITGB3	SRC	9.38	activation
ITGB5	ACACB	-1716.39	new
ITGB5	ACADM	2542.56	new
ITGB5	ACSL4	326.36	new
ITGB5	ACTN1	5210.14	new
ITGB5	ACTN2	773.73	new
ITGB5	ACVR1	-2223.76	new
ITGB5	ACVR2A	139.56	new
ITGB5	CAV1	0.48	binding/association
ITGB5	CAV2	0.66	binding/association
ITGB5	CRK	24.01	activation
ITGB5	CRKL	1.65683e+10	activation
ITGB5	PRKCB	82.76	binding/association
ITGB5	PTK2	-1.65683e+10	activation
ITGB5	SRC	-13.77	activation
ITGB6	ACACB	331.19	new
ITGB6	ACADM	-490.6	new
ITGB6	ACSL4	-62.97	new
ITGB6	ACTN1	-1005.33	new
ITGB6	ACTN2	-149.3	new
ITGB6	ACVR1	429.09	new
ITGB6	ACVR2A	-26.93	new
ITGB6	CAV1	-0.32	binding/association
ITGB6	CAV2	-0.43	binding/association
ITGB6	CRK	-0.33	activation
ITGB6	CRKL	-3.19696e+09	activation
ITGB6	PRKCB	-0.95	binding/association
ITGB6	PTK2	3.19696e+09	activation
ITGB6	SRC	0.38	activation
ITGB8	ACACB	21.14	new
ITGB8	ACADM	-31.31	new
ITGB8	ACSL4	-4.02	new
ITGB8	ACTN1	-64.16	new
ITGB8	ACTN2	-9.53	new
ITGB8	ACVR1	27.38	new
ITGB8	ACVR2A	-1.72	new
ITGB8	CAV2	-0.06	binding/association
ITGB8	CRK	-0.13	activation
ITGB8	CRKL	-2.04025e+08	activation
ITGB8	PRKCB	-0.23	binding/association
ITGB8	PTK2	2.04025e+08	activation
ITGB8	SRC	0.35	activation
JAG1	NOTCH2	13.9	inhibition
JAG1	NOTCH4	1.11	inhibition
JAK1	PIK3CG	-44.75	phosphorylation
JAK1	STAT1	-141.62	activation(phosphorylation)
JAK1	STAT2	88.26	phosphorylation
JAK1	STAT3	106.08	activation(phosphorylation)
JAK1	STAT4	454.27	phosphorylation
JAK2	PIK3CG	11.69	phosphorylation
JAK2	STAT1	-8.41	activation(phosphorylation)
JAK2	STAT2	12.2	activation(phosphorylation)
JAK2	STAT3	10.01	activation(phosphorylation)
JAK2	STAT4	-10.15	phosphorylation
JMJD7-PLA2G4B	PRKCB	11.96	compound
JUN	CCND2	6.16	expression
JUN	IL8	22.82	expression
JUP	LEF1	4.88	binding/association
JUP	TCF7L2	15.75	binding/association
KDR	PIK3CG	131.25	activation
KDR	PTK2	-24.8	activation
KDR	SHC1	-11.34	activation
KDR	SRC	48.63	activation
KIT	HRAS	0.16	activation
KIT	NRAS	3.71	activation
KIT	PIK3CG	23.81	activation
KIT	STAT3	-1.75	activation
LAMB1	DAG1	16615.3	activation
LAMB1	ITGA2B	-3.74	activation
LAMB1	ITGA5	2.13	activation
LAMB1	ITGA6	-0.47	activation
LAMB1	ITGA9	-1.54	activation
LAMB1	ITGAV	-1.06	activation
LAMB1	ITGB1	-105.01	activation
LAMB1	ITGB3	13.09	activation
LAMB1	ITGB5	-16513.4	activation
LAMB1	ITGB6	-14.42	activation
LAMB1	ITGB8	82.75	activation
LEF1	CCND2	3.57	expression
LEF1	JUN	-1.02	expression
LIMK2	CFL2	0.52	inhibition(phosphorylation)
MAGI3	PTEN	19.31	activation
MAP2K1	MAPK1	45.69	activation(phosphorylation)
MAP2K1	MAPK3	-6.27	activation(phosphorylation)
MAP2K1	MAPK8	2.25	activation(phosphorylation)
MAP2K1	PIK3CG	4.62	activation(phosphorylation)
MAP2K6	MAPK12	3.25	activation(phosphorylation)
MAP2K6	MAPK13	0.25	activation(phosphorylation)
MAP2K6	MAPK14	-8.16	activation(phosphorylation)
MAP3K4	MAP2K6	7.32	activation(phosphorylation)
MAP3K7	IKBKB	10.16	activation(phosphorylation)
MAP3K7	IKBKG	-3.48	activation(phosphorylation)
MAP3K7	MAP2K6	-1.19	phosphorylation
MAPK1	CDK4	3.97	expression
MAPK1	FOS	0.18	activation(phosphorylation)
MAPK1	HRAS	-0.53	inhibition(phosphorylation)
MAPK1	JMJD7-PLA2G4B	1.74	activation
MAPK1	JUN	0.2	activation(phosphorylation)
MAPK1	NRAS	0.63	inhibition(phosphorylation)
MAPK1	PLA2G3	-2.29	activation
MAPK1	PLA2G6	-2.48	activation
MAPK1	RPS6KA5	-2.19	activation(phosphorylation)
MAPK1	SMAD1	-0.39	inhibition(phosphorylation)
MAPK1	SMAD3	1.24	inhibition(phosphorylation)
MAPK1	SMAD4	-96.78	inhibition(phosphorylation)
MAPK1	SMAD9	-0.1	inhibition(phosphorylation)
MAPK1	STMN1	96.2	phosphorylation
MAPK12	FOS	14.32	activation
MAPK12	JUN	-182.32	activation
MAPK12	MAPKAPK5	-22.34	phosphorylation
MAPK12	MEF2C	434.06	phosphorylation
MAPK12	NFATC2	-2132.02	activation(indirect effect)
MAPK12	NFATC3	434.06	activation(indirect effect)
MAPK12	NFATC4	-189.06	activation(indirect effect)
MAPK12	RPS6KA5	-112.16	phosphorylation
MAPK12	TP53	-45.42	phosphorylation
MAPK13	FOS	-1.02	activation
MAPK13	JUN	0.5	activation
MAPK13	MAPKAPK5	-0.09	phosphorylation
MAPK13	MEF2C	-5.68	phosphorylation
MAPK13	NFATC2	55.85	activation(indirect effect)
MAPK13	NFATC3	-5.68	activation(indirect effect)
MAPK13	NFATC4	5.21	activation(indirect effect)
MAPK13	RPS6KA5	1.56	phosphorylation
MAPK13	TP53	0.91	phosphorylation
MAPK14	FOS	-0.3	activation
MAPK14	JUN	0.37	activation
MAPK14	MAPKAPK5	-0.02	phosphorylation
MAPK14	MEF2C	-0.03	phosphorylation
MAPK14	NFATC2	2.95	activation(indirect effect)
MAPK14	NFATC3	-0.03	activation(indirect effect)
MAPK14	NFATC4	0.51	activation(indirect effect)
MAPK14	RPS6KA5	-0.55	phosphorylation
MAPK14	TP53	-0.02	phosphorylation
MAPK3	CDK4	-17.02	expression
MAPK3	FOS	3.95	activation(phosphorylation)
MAPK3	HRAS	16.62	inhibition(phosphorylation)
MAPK3	JMJD7-PLA2G4B	39.91	activation
MAPK3	JUN	-1.2	activation(phosphorylation)
MAPK3	NRAS	-25.87	inhibition(phosphorylation)
MAPK3	PLA2G3	542.28	activation
MAPK3	PLA2G6	3.8	activation
MAPK3	RPS6KA5	-98.89	activation(phosphorylation)
MAPK3	SMAD1	14.94	inhibition(phosphorylation)
MAPK3	SMAD3	30.81	inhibition(phosphorylation)
MAPK3	SMAD4	1810.93	inhibition(phosphorylation)
MAPK3	SMAD9	43.65	inhibition(phosphorylation)
MAPK3	STMN1	-1783.56	phosphorylation
MAPK8	CRK	3.78	binding/association
MAPK8	CRKL	-12.82	binding/association
MAPK8	FOS	-2.42	phosphorylation
MAPK8	JUN	5.74	activation(phosphorylation)
MAPK8	NFATC2	44.64	inhibition(phosphorylation)
MAPK8	NFATC4	9.44	inhibition(phosphorylation)
MAPK8	TP53	0.74	activation
MET	HRAS	0.72	activation
MET	NRAS	2.73	activation
MET	PIK3CG	13.71	activation
MET	PTK2	-4.25	activation
MET	SHC1	1.86	activation
MMP14	MMP2	11.93	binding/association
MSN	ICAM1	10.57	binding/association
MYLK	MYL2	1.54	activation(phosphorylation)
MYLK	MYLPF	2.58	activation(phosphorylation)
NCOR2	RBPJ	142.05	inhibition
NCSTN	NOTCH2	28.98	activation
NCSTN	NOTCH4	12.23	activation
NFKB1	FIGF	-1.93	expression
NFKB1	IL8	0.9	expression
NFKB1	PGF	0.79	expression
NFKB1	TRAF6	23.13	expression
NOTCH2	RBPJ	27.05	activation
NOTCH4	RBPJ	66.42	activation
NRAS	ARAF	-27342.7	activation
NRAS	FOS	4.75	indirect effect
NRAS	JUN	-0.53	indirect effect
NRAS	MAPK1	13.44	indirect effect
NRAS	MAPK12	-120287	activation(phosphorylation)(indirect effect)
NRAS	MAPK13	17.55	activation(phosphorylation)(indirect effect)
NRAS	MAPK14	7.85	activation(phosphorylation)(indirect effect)
NRAS	MAPK3	147624	indirect effect
NRAS	PIK3CG	-0.94	activation
PGF	FLT1	0.75	activation
PGF	KDR	-0.75	activation
PGF	MET	2.44	activation
PIK3CG	HRAS	-0.17	activation(indirect effect)
PIK3CG	ILK	-0.17	compound
PIK3CG	NRAS	0.8	activation(indirect effect)
PIK3CG	PTK2	-0.14	activation(phosphorylation)
PLA2G3	PRKCB	0.38	compound
PLA2G6	PRKCB	23.75	compound
PLCB4	CALM1	21825.4	compound
PLCB4	CAMK2D	21825.4	compound
PLCB4	CAMK2G	-1163.96	compound
PLCB4	PPP3CA	2.86	compound
PLCB4	PPP3CB	-19.8	compound
PLCB4	PPP3CC	-42486.9	compound
PLCB4	PRKCB	11.72	compound(activation)
PLCE1	PRKCB	37.69	compound
PPARA	ACADM	-0.39	expression
PPARA	ACSL4	-0.12	expression
PPARA	ANGPTL4	0.5	expression
PPARA	CPT1B	0.37	expression
PPARA	SCD	-0.2	expression
PPARA	SLC27A1	-0.93	expression
PPARG	ACSL4	0.08	expression
PPARG	ANGPTL4	1.85	expression
PPARG	CD36	-0.05	expression
PPARG	CPT1B	0.54	expression
PPARG	CYP27A1	-0.52	expression
PPARG	SCD	-1.52	expression
PPARG	SLC27A1	-9.83	expression
PPARG	SORBS1	0.8	expression
PPM1A	MAP2K6	172.32	inhibition(dephosphorylation)
PPP1CA	CALM1	5.77008e+06	inhibition(dephosphorylation)
PPP1CA	CAMK2D	5.77008e+06	inhibition
PPP1CA	CAMK2G	-5656.35	inhibition
PPP1CA	GYS1	-1.15345e+07	activation(dephosphorylation)
PPP1CA	MYL2	49.16	inhibition(dephosphorylation)
PPP1CA	MYLPF	15.51	inhibition(dephosphorylation)
PPP1CB	ACACB	0.06	new
PPP1CB	ACADM	-0.08	new
PPP1CB	ACSL4	0.04	new
PPP1CB	ACTN1	0.07	new
PPP1CB	ACTN2	0.06	new
PPP1CB	CALM1	-8.73542e+07	inhibition(dephosphorylation)
PPP1CB	CAMK2D	-8.73542e+07	inhibition
PPP1CB	CAMK2G	19179.3	inhibition
PPP1CB	GYS1	1.74689e+08	activation(dephosphorylation)
PPP1CB	MYL2	442.25	inhibition(dephosphorylation)
PPP1CB	MYLPF	28.47	inhibition(dephosphorylation)
PPP1R12A	CAMK2D	22643.4	inhibition
PPP1R12A	CAMK2G	-22678.3	inhibition
PPP1R12A	MYL2	39.55	inhibition(dephosphorylation)
PPP1R12A	MYLPF	47.69	inhibition(dephosphorylation)
PPP1R3C	CALM1	-3.16695e+07	inhibition(dephosphorylation)
PPP1R3C	GYS1	3.16695e+07	activation(dephosphorylation)
PPP2CA	MAP2K1	31.09	inhibition
PPP2CA	MAPK1	141.2	inhibition
PPP2CA	MAPK3	29	inhibition
PPP2CA	PRKCB	55.2	inhibition
PPP2R1A	MAP2K1	106.85	inhibition
PPP2R1A	MAPK1	-145.52	inhibition
PPP2R1A	MAPK3	28.02	inhibition
PPP2R1A	PRKCB	29.52	inhibition
PPP3CA	CALM1	9.95	binding/association
PPP3CA	NFATC2	-21.17	activation(dephosphorylation)
PPP3CA	NFATC3	9.95	activation(dephosphorylation)
PPP3CA	NFATC4	-11.94	activation(dephosphorylation)
PPP3CB	CALM1	0.34	binding/association
PPP3CB	NFATC2	1.32	activation(dephosphorylation)
PPP3CB	NFATC3	0.34	activation(dephosphorylation)
PPP3CB	NFATC4	-0.9	activation(dephosphorylation)
PPP3CC	CALM1	49.66	binding/association
PPP3CC	NFATC2	-206.52	activation(dephosphorylation)
PPP3CC	NFATC3	49.66	activation(dephosphorylation)
PPP3CC	NFATC4	-48.45	activation(dephosphorylation)
PRKAA2	ACACB	4.32	inhibition(phosphorylation)
PRKAA2	SLC2A1	-7.32	activation(indirect effect)
PRKAA2	SLC2A4	16.48	activation(indirect effect)
PRKAG3	ACACB	-0.94	inhibition(phosphorylation)
PRKAG3	SLC2A1	-1.07	activation(indirect effect)
PRKAG3	SLC2A4	7.07	activation(indirect effect)
PRKCB	ARAF	-2341.8	activation
PRKCB	GRIN1	10.05	indirect effect
PRKCB	HRAS	-0.29	activation(indirect effect)
PRKCB	JMJD7-PLA2G4B	1.08	indirect effect
PRKCB	MAP3K4	0.03	indirect effect
PRKCB	MMP14	0.31	indirect effect
PRKCB	NRAS	0.14	activation(indirect effect)
PRKCB	PLA2G3	10.05	indirect effect
PRKCB	PLA2G6	-0.48	indirect effect
PRKCB	PTK2	2339.55	activation(phosphorylation)
PRKCB	SRC	0.17	indirect effect
PRKCB	TJP1	-0.37	phosphorylation
PRKCH	ARAF	5.55	activation
PRKCH	TJP1	15.9	phosphorylation
PTEN	PTK2	33.79	inhibition(dephosphorylation)
PTK2	MAPK1	71.41	indirect effect
PTK2	MAPK3	45	indirect effect
PTK2	PIK3CG	-18.85	activation
PTK2	SHC1	-34.49	activation(phosphorylation)
PTK2	SRC	28.81	phosphorylation
PTPRR	MAPK1	-1.14	inhibition(dephosphorylation)
PTPRR	MAPK12	151173	inhibition(dephosphorylation)
PTPRR	MAPK13	4.49	inhibition(dephosphorylation)
PTPRR	MAPK14	11.93	inhibition(dephosphorylation)
PTPRR	MAPK3	-151175	inhibition(dephosphorylation)
PTPRR	MAPK8	-0.38	inhibition(dephosphorylation)
PVRL2	PVRL2	3.4	binding/association
PVRL2	SRC	-0.32	indirect effect
RAMP1	GNAS	105.85	activation
RAP1A	ARAF	2195.67	activation
RAP1A	ITGB1	-2133.56	activation
RAP1A	MAPK8	11.49	activation
RASA2	HRAS	0.16	inhibition
RASA2	NRAS	0.48	inhibition
RBL1	E2F5	1.55	dissociation
RELA	FIGF	0.23	expression
RELA	IL8	14.09	expression
RELA	PGF	7.9	expression
RELA	TRAF6	23.19	expression
RPS6KA5	ATF4	18.41	activation(phosphorylation)
RUNX1T1	JUP	13.41	expression
RUNX1T1	SPI1	-1.16	inhibition
SFN	CCNB2	0.92	inhibition
SFRP1	FZD3	13.51	inhibition
SFRP1	FZD6	0.33	inhibition
SFRP1	WNT10B	-4.89	inhibition
SFRP4	FZD3	57.62	inhibition
SFRP4	FZD6	42.04	inhibition
SFRP4	WNT10B	-28.09	inhibition
SH3GL3	ERBB4	188.57	binding/association
SH3GL3	FGFR2	-198.21	binding/association
SH3GL3	FLT1	-5.42	binding/association
SH3GL3	KDR	0.82	binding/association
SH3GL3	KIT	-11.07	binding/association
SH3GL3	MET	-10.86	binding/association
SH3GL3	TGFBR1	27.93	binding/association
SH3GLB2	ERBB4	51.1	binding/association
SH3GLB2	FGFR2	-31.6	binding/association
SH3GLB2	FLT1	2.97	binding/association
SH3GLB2	KDR	-4.98	binding/association
SH3GLB2	KIT	-4.75	binding/association
SH3GLB2	MET	-4.17	binding/association
SH3GLB2	TGFBR1	32.43	binding/association
SLC9A1	MSN	0.34	activation
SMAD1	ID1	14.92	expression
SMAD1	ID2	8.46	expression
SMAD1	ID4	-0.17	expression
SMAD1	SMAD4	-1.52	activation
SMAD3	ACACB	-108.55	new
SMAD3	ACADM	84.48	new
SMAD3	ACSL4	-45.95	new
SMAD3	ACTN1	10.55	new
SMAD3	ACTN2	14.15	new
SMAD3	ACVR1	7.95	new
SMAD3	CDKN1A	-9.65738e+08	expression
SMAD3	E2F5	1.32	activation
SMAD3	EP300	9.67667e+08	activation
SMAD3	RBL1	1.41	activation
SMAD3	SMAD4	-1.92893e+06	activation
SMAD3	SP1	-0.1	activation
SMAD4	ACACB	2798.42	new
SMAD4	ACADM	-121.14	new
SMAD4	ACSL4	5121.09	new
SMAD4	ACTN1	2149.98	new
SMAD4	ACTN2	3352.8	new
SMAD4	ACVR1	-522.45	new
SMAD4	ACVR2A	1647.51	new
SMAD4	ACVR2B	1757.72	new
SMAD4	ADAM17	138.63	new
SMAD4	ADRBK1	-1840.3	new
SMAD4	ADRBK2	209.24	new
SMAD4	CDKN1A	1.73821e+10	expression
SMAD4	E2F5	42.17	activation
SMAD4	EP300	-1.73821e+10	activation
SMAD4	ID1	75.13	expression
SMAD4	ID2	7.32	expression
SMAD4	ID4	6.24	expression
SMAD4	LEF1	-35.41	activation
SMAD4	RBL1	34	activation
SMAD4	SMAD3	-4.58	binding/association
SMAD4	SP1	83.26	activation
SMAD4	TCF7L2	-26.68	activation
SMAD6	SMAD1	-0.07	inhibition
SMAD6	SMAD3	0.44	inhibition
SMAD6	SMAD9	2.11	inhibition
SMAD9	ID1	4.46	expression
SMAD9	ID2	-0.91	expression
SMAD9	ID4	-0.84	expression
SMAD9	SMAD4	-0.17	activation
SOX17	LEF1	-3.37	inhibition
SOX17	TCF7L2	14.82	inhibition
SRC	HRAS	8.83	indirect effect
SRC	NRAS	10.02	indirect effect
SRC	PIK3CG	45.63	activation
SRC	PTK2	-14.45	activation(phosphorylation)
SREBF1	ACACB	2.64	activation(indirect effect)
SREBF1	FAS	22.25	activation(indirect effect)
SRF	FOS	74.35	expression
STAT1	CCND2	-4.85	expression
STAT1	FIGF	7.1	expression
STAT1	PGF	11.7	expression
STAT2	CCND2	13.62	expression
STAT3	CCND2	120	expression
STAT3	CPT1B	-43.48	expression
STAT3	FIGF	-27.97	expression
STAT3	PGF	-92.31	expression
STAT3	PPARGC1A	-15.62	repression
STAT3	PRKAA2	118.14	inhibition(indirect effect)
STAT3	PRKAG3	-32.56	inhibition(indirect effect)
STAT4	CCND2	0.11	expression
TAB1	MAP3K7	20.15	phosphorylation
TCF7L2	CCND2	11.1	expression
TCF7L2	JUN	0.28	expression
TGFB1	SMAD3	6.37	activation(indirect effect)
TGFB1	TGFBR1	14.73	activation
TGFB2	SMAD3	0.59	activation(indirect effect)
TGFB2	TGFBR1	-0.44	activation
TGFB3	SMAD3	0.79	activation(indirect effect)
TGFB3	TGFBR1	0.47	activation
TGFBR1	SMAD3	4.22	activation(phosphorylation)
TGFBR1	SMAD4	0.57	indirect effect
THBS1	CD36	2.12	activation
THBS1	ITGA2B	3.67	activation
THBS1	ITGA5	62.48	activation
THBS1	ITGA6	-34.1	activation
THBS1	ITGA9	0.24	activation
THBS1	ITGAV	-92.94	activation
THBS1	ITGB1	361.44	activation
THBS1	ITGB3	119.86	activation
THBS1	ITGB5	-384.75	activation
THBS1	ITGB6	-147.21	activation
THBS1	ITGB8	431.97	activation
THBS3	CD36	-88.18	activation
THBS3	ITGA2B	78.91	activation
THBS3	ITGA5	22.85	activation
THBS3	ITGA6	65.03	activation
THBS3	ITGA9	-4.01	activation
THBS3	ITGAV	79.07	activation
THBS3	ITGB1	-1052.58	activation
THBS3	ITGB3	-10.78	activation
THBS3	ITGB5	1141.96	activation
THBS3	ITGB6	-24.85	activation
THBS3	ITGB8	-1422.9	activation
TJP1	CTNNA1	8.58	binding/association
TLN2	ITGA2B	-5.26	binding/association
TLN2	ITGA5	-0.51	binding/association
TLN2	ITGA6	2.45	binding/association
TLN2	ITGA9	-0.24	binding/association
TLN2	ITGAV	1.01	binding/association
TLN2	ITGB1	-50.46	binding/association
TLN2	ITGB3	-1.61	binding/association
TLN2	ITGB5	60.64	binding/association
TLN2	ITGB6	2.51	binding/association
TLN2	ITGB8	-32.09	binding/association
TNC	ITGA2B	36.76	activation
TNC	ITGA5	15.43	activation
TNC	ITGA6	-83.6	activation
TNC	ITGA9	-3.45	activation
TNC	ITGAV	-53.55	activation
TNC	ITGB1	-1247.09	activation
TNC	ITGB3	146.98	activation
TNC	ITGB5	1258.75	activation
TNC	ITGB6	-87.3	activation
TNC	ITGB8	-232.67	activation
TNFRSF1A	CASP3	11.92	activation
TNFRSF1A	TAB1	-1.74	indirect effect
TNFRSF1A	TRAF6	4.72	indirect effect
TNXB	ITGA2B	-2.06	activation
TNXB	ITGA5	24.75	activation
TNXB	ITGA6	15.16	activation
TNXB	ITGA9	-5.45	activation
TNXB	ITGAV	-8.68	activation
TNXB	ITGB1	418.96	activation
TNXB	ITGB3	-1.63	activation
TNXB	ITGB5	-510.13	activation
TNXB	ITGB6	-117.36	activation
TNXB	ITGB8	1108.25	activation
TP53	CCNG1	-21593.4	expression
TP53	CDKN1A	-21593.4	expression
TP53	FAS	-6.62	expression
TP53	GADD45A	1.04	expression
TP53	GADD45G	-1.06	expression
TP53	IGFBP3	11.52	expression
TP53	PTEN	43198.4	expression
TP53	SERPINE1	10.93	expression
TP53	SFN	51.61	expression
TP53	SHISA5	-19.08	expression
TP53	THBS1	1.18	expression
TPM3	HRAS	1008.21	indirect effect
TPM3	NRAS	-527.39	indirect effect
TRAF6	ERBB4	-10.92	ubiquination
TRAF6	FGFR2	5.77	ubiquination
TRAF6	FLT1	1.34	ubiquination
TRAF6	IKBKB	-0.88	activation(indirect effect)
TRAF6	KDR	0.56	ubiquination
TRAF6	KIT	-3.73	ubiquination
TRAF6	MAP3K7	-0.64	activation
TRAF6	MAPK8	-0.55	activation
TRAF6	MET	0.61	ubiquination
TRAF6	TGFBR1	7.32	ubiquination
TRPC1	RYR1	0.68	compound
TRPC1	RYR3	3.2	compound
TYK2	PIK3CG	-20.76	phosphorylation
TYK2	STAT1	-24.17	phosphorylation
TYK2	STAT2	80.8	phosphorylation
TYK2	STAT3	24.41	phosphorylation
TYK2	STAT4	-106.54	phosphorylation
VCAM1	ITGB1	-2.7	binding/association
VCAM1	MSN	49.59	binding/association
VCAM1	PIK3CG	80.63	indirect effect
VCL	ACTN1	-23.05	binding/association
VCL	ACTN2	19.55	binding/association
VCL	SORBS1	20.78	binding/association
VCL	TLN2	54.34	binding/association
VTN	ITGA2B	-2.55	activation
VTN	ITGA5	0.08	activation
VTN	ITGA6	0.51	activation
VTN	ITGA9	-0.05	activation
VTN	ITGAV	-0.17	activation
VTN	ITGB1	-15.63	activation
VTN	ITGB3	0.19	activation
VTN	ITGB5	17.65	activation
VTN	ITGB6	-0.06	activation
VTN	ITGB8	4.05	activation
WNT10B	FZD3	1.29	activation(phosphorylation)
WNT10B	FZD6	0.47	activation(phosphorylation)
WWP1	ERBB4	491.09	ubiquination
WWP1	FGFR2	1365.47	ubiquination
WWP1	FLT1	-7.29	ubiquination
WWP1	KDR	37.46	ubiquination
WWP1	KIT	-3.13	ubiquination
WWP1	MET	-260.15	ubiquination
WWP1	TGFBR1	-29.21	ubiquination
YWHAH	CDC25C	295.04	binding/association
YWHAZ	CDC25C	536.09	binding/association
ZAK	TJP1	29.73	activation(phosphorylation)
