# Supplementary material for: Comparative Analyses by Sequencing of Transcriptomes during Skeletal Muscle Development between Pig Breeds Differing in Muscle Growth Rate and Fatness
Source: PLoS One. 2011 May 26;6(5):e19774. doi: 10.1371/journal.pone.0019774 (PMC3102668; doi:10.1371/journal.pone.0019774)
Supplement: Table S8 — GO pathways of DE genes. (XLS) [file pone.0019774.s020.xls]

## Sheet: LR2 vs LR1-up regulation
go_id	go_name	pig_Genebank	pig_Description	pig_Gene symbol	human_Genebank	human_Gene ID	human_Gene	human_Gene des	pvalue	FDR	enrichment
GO:0002376	immune system process	AK230559.1	Sus scrofa mRNA, clone:AMP010010A02, expressed in alveolar macrophage	----	BC064357.1	8301	PICALM	phosphatidylinositol binding clathrin assembly protein	0.000125637	0.0527814	0.141653
GO:0002376	immune system process	CN164178	994302 MARC 4PIG Sus scrofa cDNA 5', mRNA sequence						0.000125637	0.0527814	0.141653
GO:0006091	generation of precursor metabolites and energy	AK231172.1	Sus scrofa mRNA, clone:ITT010006G12, expressed in intestine		BC002595.2	4713	NDUFB7	NADH dehydrogenase (ubiquinone) 1 beta subcomplex, 7, 18kDa	0.000156094	0.0527814	3.51822
GO:0006091	generation of precursor metabolites and energy	AK231733.1	Sus scrofa mRNA, clone:LNG010017B08, expressed in lung		BC003417.1	4705	NDUFA10	NADH dehydrogenase (ubiquinone) 1 alpha subcomplex, 10, 42kDa	0.000156094	0.0527814	3.51822
GO:0006091	generation of precursor metabolites and energy	AK236182.1	Sus scrofa mRNA, clone:OVRM10161E01, expressed in ovary		NM_005006.5	4719	NDUFS1	NADH dehydrogenase (ubiquinone) Fe-S protein 1, 75kDa (NADH-coenzyme Q reductase)	0.000156094	0.0527814	3.51822
GO:0006091	generation of precursor metabolites and energy	AK236324.1	Sus scrofa mRNA, clone:OVRM10181E04, expressed in ovary		BC000439.2	5162	PDHB	pyruvate dehydrogenase (lipoamide) beta	0.000156094	0.0527814	3.51822
GO:0006091	generation of precursor metabolites and energy	AK236637.1	Sus scrofa mRNA, clone:OVRM10210C08, expressed in ovary		AK301837.1	25828	TXN2	thioredoxin 2	0.000156094	0.0527814	3.51822
GO:0006091	generation of precursor metabolites and energy	AK236752.1	Sus scrofa mRNA, clone:OVRM10224E06, expressed in ovary		NM_005003.2	4706	NDUFAB1	NADH dehydrogenase (ubiquinone) 1, alpha/beta subcomplex, 1, 8kDa	0.000156094	0.0527814	3.51822
GO:0006091	generation of precursor metabolites and energy	AY610394.1	Sus scrofa clone reru31c_i7.y1.abd, mRNA sequence		NM_002495.2	4724	NDUFS4	NADH dehydrogenase (ubiquinone) Fe-S protein 4, 18kDa (NADH-coenzyme Q reductase)	0.000156094	0.0527814	3.51822
GO:0006091	generation of precursor metabolites and energy	BP142174	BP142174 full-length enriched swine cDNA library, adult ovary Sus scrofa cDNA clone OVR010014C02 5', mRNA sequence						0.000156094	0.0527814	3.51822
GO:0006091	generation of precursor metabolites and energy	CK453061	908745 MARC 4PIG Sus scrofa cDNA 5', mRNA sequence						0.000156094	0.0527814	3.51822
GO:0006091	generation of precursor metabolites and energy	CK460216	930472 MARC 4PIG Sus scrofa cDNA 5', mRNA sequence						0.000156094	0.0527814	3.51822
GO:0006091	generation of precursor metabolites and energy	CN157675	946398 MARC 4PIG Sus scrofa cDNA 5', mRNA sequence						0.000156094	0.0527814	3.51822
GO:0006091	generation of precursor metabolites and energy	DN111105	1110192 MARC 4PIG Sus scrofa cDNA 5', mRNA sequence						0.000156094	0.0527814	3.51822
GO:0006091	generation of precursor metabolites and energy	EV869069	rpbfe0138_n6.y1 bfe Sus scrofa cDNA 5', mRNA sequence						0.000156094	0.0527814	3.51822
GO:0022900	electron transport chain	AK231172.1	Sus scrofa mRNA, clone:ITT010006G12, expressed in intestine		BC002595.2	4713	NDUFB7	NADH dehydrogenase (ubiquinone) 1 beta subcomplex, 7, 18kDa	0.000751729	0.122681	3.98949
GO:0022900	electron transport chain	AK231733.1	Sus scrofa mRNA, clone:LNG010017B08, expressed in lung		BC003417.1	4705	NDUFA10	NADH dehydrogenase (ubiquinone) 1 alpha subcomplex, 10, 42kDa	0.000751729	0.122681	3.98949
GO:0022900	electron transport chain	AK236182.1	Sus scrofa mRNA, clone:OVRM10161E01, expressed in ovary		NM_005006.5	4719	NDUFS1	NADH dehydrogenase (ubiquinone) Fe-S protein 1, 75kDa (NADH-coenzyme Q reductase)	0.000751729	0.122681	3.98949
GO:0022900	electron transport chain	AK236637.1	Sus scrofa mRNA, clone:OVRM10210C08, expressed in ovary		AK301837.1	25828	TXN2	thioredoxin 2	0.000751729	0.122681	3.98949
GO:0022900	electron transport chain	AK236752.1	Sus scrofa mRNA, clone:OVRM10224E06, expressed in ovary		NM_005003.2	4706	NDUFAB1	NADH dehydrogenase (ubiquinone) 1, alpha/beta subcomplex, 1, 8kDa	0.000751729	0.122681	3.98949
GO:0022900	electron transport chain	BP142174	BP142174 full-length enriched swine cDNA library, adult ovary Sus scrofa cDNA clone OVR010014C02 5', mRNA sequence						0.000751729	0.122681	3.98949
GO:0022900	electron transport chain	CK460216	930472 MARC 4PIG Sus scrofa cDNA 5', mRNA sequence						0.000751729	0.122681	3.98949
GO:0022900	electron transport chain	CN157675	946398 MARC 4PIG Sus scrofa cDNA 5', mRNA sequence						0.000751729	0.122681	3.98949
GO:0022900	electron transport chain	DN111105	1110192 MARC 4PIG Sus scrofa cDNA 5', mRNA sequence						0.000751729	0.122681	3.98949
GO:0019222	regulation of metabolic process	AK234633.1	Sus scrofa mRNA, clone:OVR010100E10, expressed in ovary		BC005295.1	10605	PAIP1	poly(A) binding protein interacting protein 1	0.00126968	0.142915	0.531932
GO:0019222	regulation of metabolic process	AK238657.1	Sus scrofa mRNA, clone:THY010014G12, expressed in thymus		NM_004514.3	3607	FOXK2	forkhead box K2	0.00126968	0.142915	0.531932
GO:0019222	regulation of metabolic process	AK239756.1	Sus scrofa mRNA, clone:THY010202F01, expressed in thymus		BC004465.1	54386	TERF2IP	telomeric repeat binding factor 2, interacting protein	0.00126968	0.142915	0.531932
GO:0019222	regulation of metabolic process	AY609778.1	Sus scrofa clone Clu_30724.scr.msk.p1.Contig4, mRNA sequence		CR616160.1	11267	SNF8	SNF8, ESCRT-II complex subunit, homolog (S. cerevisiae)	0.00126968	0.142915	0.531932
GO:0019222	regulation of metabolic process	AY610090.1	Sus scrofa clone Clu_67806.scr.msk.p1.Contig1, mRNA sequence		AK001171.1	84337	ELOF1	elongation factor 1 homolog (S. cerevisiae)	0.00126968	0.142915	0.531932
GO:0019222	regulation of metabolic process	CF793647	889067 MARC 4PIG Sus scrofa cDNA 5', mRNA sequence						0.00126968	0.142915	0.531932
GO:0019222	regulation of metabolic process	BX664960	BX664960 Sus Scrofa library (scag) Sus scrofa cDNA clone scag0008.d.11 3prim, mRNA sequence						0.00126968	0.142915	0.531932
GO:0019222	regulation of metabolic process	CK452762	908422 MARC 4PIG Sus scrofa cDNA 5', mRNA sequence						0.00126968	0.142915	0.531932
GO:0019222	regulation of metabolic process	CK461926	932690 MARC 4PIG Sus scrofa cDNA 5', mRNA sequence						0.00126968	0.142915	0.531932
GO:0019222	regulation of metabolic process	CK467405	938702 MARC 4PIG Sus scrofa cDNA 5', mRNA sequence						0.00126968	0.142915	0.531932
GO:0019222	regulation of metabolic process	CK467896	939242 MARC 4PIG Sus scrofa cDNA 5', mRNA sequence						0.00126968	0.142915	0.531932
GO:0019222	regulation of metabolic process	BX915128	BX915128 Sus Scrofa library (scan) Sus scrofa cDNA clone scan0028.a.21 5prim, mRNA sequence						0.00126968	0.142915	0.531932
GO:0019222	regulation of metabolic process	BX924453	BX924453 Sus Scrofa library (scan) Sus scrofa cDNA clone scan0016.m.23 5prim, mRNA sequence						0.00126968	0.142915	0.531932
GO:0019222	regulation of metabolic process	CN158127	946898 MARC 4PIG Sus scrofa cDNA 5', mRNA sequence						0.00126968	0.142915	0.531932
GO:0019222	regulation of metabolic process	CN164178	994302 MARC 4PIG Sus scrofa cDNA 5', mRNA sequence						0.00126968	0.142915	0.531932
GO:0019222	regulation of metabolic process	DN120593	1120622 MARC 4PIG Sus scrofa cDNA 5', mRNA sequence						0.00126968	0.142915	0.531932
GO:0019222	regulation of metabolic process	DN121268	1121355 MARC 4PIG Sus scrofa cDNA 3', mRNA sequence						0.00126968	0.142915	0.531932
GO:0019222	regulation of metabolic process	CX057037	PDUts2009C04 Porcine testis cDNA library II Sus scrofa cDNA clone PDUts2009C04 5' similar to homologue to ref|NM_017826.1| Homo sapiens hypothetical protein FLJ20449 (FLJ20449), mRNA, mRNA sequence						0.00126968	0.142915	0.531932
GO:0019222	regulation of metabolic process	EW417768	rnbm12b_c21.y1 nbm Sus scrofa cDNA 5', mRNA sequence						0.00126968	0.142915	0.531932
GO:0019222	regulation of metabolic process	EW421594	rnca11b_e13.y1 nca Sus scrofa cDNA 5', mRNA sequence						0.00126968	0.142915	0.531932
GO:0019222	regulation of metabolic process	EW464984	rnmm24c_m17.y1 nmm Sus scrofa cDNA 5', mRNA sequence						0.00126968	0.142915	0.531932
GO:0007154	cell communication	AK235171.1	Sus scrofa mRNA, clone:OVRM10055D04, expressed in ovary		AF087894.1	23564	DDAH2	dimethylarginine dimethylaminohydrolase 2	0.00138834	0.145899	0.500081
GO:0007154	cell communication	AK235751.1	Sus scrofa mRNA, clone:OVRM10111E07, expressed in ovary		NM_004323.4	573	BAG1	BCL2-associated athanogene	0.00138834	0.145899	0.500081
GO:0007154	cell communication	AK232555.1	Sus scrofa mRNA, clone:LVR010073A12, expressed in liver		NM_004208.2	9131	AIFM1	apoptosis-inducing factor, mitochondrion-associated, 1	0.00138834	0.145899	0.500081
GO:0007154	cell communication	AK238982.1	Sus scrofa mRNA, clone:THY010053D09, expressed in thymus		DQ896646.2	65018	PINK1	PTEN induced putative kinase 1	0.00138834	0.145899	0.500081
GO:0007154	cell communication	AK236416.1	Sus scrofa mRNA, clone:OVRM10189H07, expressed in ovary		NM_001071.2	7298	TYMS	thymidylate synthetase	0.00138834	0.145899	0.500081
GO:0007154	cell communication	AK240181.1	Sus scrofa mRNA, clone:UTR010038F11, expressed in uterus		NM_032514.2	84557	MAP1LC3A	microtubule-associated protein 1 light chain 3 alpha	0.00138834	0.145899	0.500081
GO:0007154	cell communication	AY609666.1	Sus scrofa clone Clu_24219.scr.msk.p1.Contig4, mRNA sequence		NM_016041.3	51009	DERL2	Der1-like domain family, member 2	0.00138834	0.145899	0.500081
GO:0007154	cell communication	AY610394.1	Sus scrofa clone reru31c_i7.y1.abd, mRNA sequence		NM_002495.2	4724	NDUFS4	NADH dehydrogenase (ubiquinone) Fe-S protein 4, 18kDa (NADH-coenzyme Q reductase)	0.00138834	0.145899	0.500081
GO:0007154	cell communication	BX923538	BX923538 Sus Scrofa library (scan) Sus scrofa cDNA clone scan0014.h.08 5prim, mRNA sequence						0.00138834	0.145899	0.500081
GO:0007154	cell communication	CN157951	946698 MARC 4PIG Sus scrofa cDNA 5', mRNA sequence						0.00138834	0.145899	0.500081
GO:0007154	cell communication	CN164178	994302 MARC 4PIG Sus scrofa cDNA 5', mRNA sequence						0.00138834	0.145899	0.500081
GO:0007154	cell communication	DN120593	1120622 MARC 4PIG Sus scrofa cDNA 5', mRNA sequence						0.00138834	0.145899	0.500081
GO:0007154	cell communication	DN121268	1121355 MARC 4PIG Sus scrofa cDNA 3', mRNA sequence						0.00138834	0.145899	0.500081
GO:0007154	cell communication	EW089566	recc2817c_e7.y1 ecc Sus scrofa cDNA 5', mRNA sequence						0.00138834	0.145899	0.500081
GO:0007154	cell communication	EW144888	rese17c_m9.y1 ese Sus scrofa cDNA 5', mRNA sequence						0.00138834	0.145899	0.500081
GO:0007154	cell communication	EW421594	rnca11b_e13.y1 nca Sus scrofa cDNA 5', mRNA sequence						0.00138834	0.145899	0.500081
GO:0007154	cell communication	BE014011	125574 MARC 1PIG Sus scrofa cDNA 5', mRNA sequence						0.00138834	0.145899	0.500081
GO:0065009	regulation of molecular function	EW407282	rmgp039_f21.y1 mgp Sus scrofa cDNA 5', mRNA sequence						0.00140022	0.146177	0.10624
GO:0031323	regulation of cellular metabolic process	AK234633.1	Sus scrofa mRNA, clone:OVR010100E10, expressed in ovary		BC005295.1	10605	PAIP1	poly(A) binding protein interacting protein 1	0.00146584	0.147644	0.535626
GO:0031323	regulation of cellular metabolic process	AK238657.1	Sus scrofa mRNA, clone:THY010014G12, expressed in thymus		NM_004514.3	3607	FOXK2	forkhead box K2	0.00146584	0.147644	0.535626
GO:0031323	regulation of cellular metabolic process	AK239756.1	Sus scrofa mRNA, clone:THY010202F01, expressed in thymus		BC004465.1	54386	TERF2IP	telomeric repeat binding factor 2, interacting protein	0.00146584	0.147644	0.535626
GO:0031323	regulation of cellular metabolic process	AY609778.1	Sus scrofa clone Clu_30724.scr.msk.p1.Contig4, mRNA sequence		CR616160.1	11267	SNF8	SNF8, ESCRT-II complex subunit, homolog (S. cerevisiae)	0.00146584	0.147644	0.535626
GO:0031323	regulation of cellular metabolic process	AY610090.1	Sus scrofa clone Clu_67806.scr.msk.p1.Contig1, mRNA sequence		AK001171.1	84337	ELOF1	elongation factor 1 homolog (S. cerevisiae)	0.00146584	0.147644	0.535626
GO:0031323	regulation of cellular metabolic process	CF793647	889067 MARC 4PIG Sus scrofa cDNA 5', mRNA sequence						0.00146584	0.147644	0.535626
GO:0031323	regulation of cellular metabolic process	BX664960	BX664960 Sus Scrofa library (scag) Sus scrofa cDNA clone scag0008.d.11 3prim, mRNA sequence						0.00146584	0.147644	0.535626
GO:0031323	regulation of cellular metabolic process	CK452762	908422 MARC 4PIG Sus scrofa cDNA 5', mRNA sequence						0.00146584	0.147644	0.535626
GO:0031323	regulation of cellular metabolic process	CK461926	932690 MARC 4PIG Sus scrofa cDNA 5', mRNA sequence						0.00146584	0.147644	0.535626
GO:0031323	regulation of cellular metabolic process	CK467405	938702 MARC 4PIG Sus scrofa cDNA 5', mRNA sequence						0.00146584	0.147644	0.535626
GO:0031323	regulation of cellular metabolic process	CK467896	939242 MARC 4PIG Sus scrofa cDNA 5', mRNA sequence						0.00146584	0.147644	0.535626
GO:0031323	regulation of cellular metabolic process	BX915128	BX915128 Sus Scrofa library (scan) Sus scrofa cDNA clone scan0028.a.21 5prim, mRNA sequence						0.00146584	0.147644	0.535626
GO:0031323	regulation of cellular metabolic process	BX924453	BX924453 Sus Scrofa library (scan) Sus scrofa cDNA clone scan0016.m.23 5prim, mRNA sequence						0.00146584	0.147644	0.535626
GO:0031323	regulation of cellular metabolic process	CN158127	946898 MARC 4PIG Sus scrofa cDNA 5', mRNA sequence						0.00146584	0.147644	0.535626
GO:0031323	regulation of cellular metabolic process	CN164178	994302 MARC 4PIG Sus scrofa cDNA 5', mRNA sequence						0.00146584	0.147644	0.535626
GO:0031323	regulation of cellular metabolic process	DN120593	1120622 MARC 4PIG Sus scrofa cDNA 5', mRNA sequence						0.00146584	0.147644	0.535626
GO:0031323	regulation of cellular metabolic process	DN121268	1121355 MARC 4PIG Sus scrofa cDNA 3', mRNA sequence						0.00146584	0.147644	0.535626
GO:0031323	regulation of cellular metabolic process	CX057037	PDUts2009C04 Porcine testis cDNA library II Sus scrofa cDNA clone PDUts2009C04 5' similar to homologue to ref|NM_017826.1| Homo sapiens hypothetical protein FLJ20449 (FLJ20449), mRNA, mRNA sequence						0.00146584	0.147644	0.535626
GO:0031323	regulation of cellular metabolic process	EW417768	rnbm12b_c21.y1 nbm Sus scrofa cDNA 5', mRNA sequence						0.00146584	0.147644	0.535626
GO:0031323	regulation of cellular metabolic process	EW421594	rnca11b_e13.y1 nca Sus scrofa cDNA 5', mRNA sequence						0.00146584	0.147644	0.535626
GO:0031323	regulation of cellular metabolic process	EW464984	rnmm24c_m17.y1 nmm Sus scrofa cDNA 5', mRNA sequence						0.00146584	0.147644	0.535626
GO:0060255	regulation of macromolecule metabolic process	AK234633.1	Sus scrofa mRNA, clone:OVR010100E10, expressed in ovary		BC005295.1	10605	PAIP1	poly(A) binding protein interacting protein 1	0.00198752	0.190195	0.543717
GO:0060255	regulation of macromolecule metabolic process	AK238657.1	Sus scrofa mRNA, clone:THY010014G12, expressed in thymus		NM_004514.3	3607	FOXK2	forkhead box K2	0.00198752	0.190195	0.543717
GO:0060255	regulation of macromolecule metabolic process	AK239756.1	Sus scrofa mRNA, clone:THY010202F01, expressed in thymus		BC004465.1	54386	TERF2IP	telomeric repeat binding factor 2, interacting protein	0.00198752	0.190195	0.543717
GO:0060255	regulation of macromolecule metabolic process	AY609778.1	Sus scrofa clone Clu_30724.scr.msk.p1.Contig4, mRNA sequence		CR616160.1	11267	SNF8	SNF8, ESCRT-II complex subunit, homolog (S. cerevisiae)	0.00198752	0.190195	0.543717
GO:0060255	regulation of macromolecule metabolic process	AY610090.1	Sus scrofa clone Clu_67806.scr.msk.p1.Contig1, mRNA sequence		AK001171.1	84337	ELOF1	elongation factor 1 homolog (S. cerevisiae)	0.00198752	0.190195	0.543717
GO:0060255	regulation of macromolecule metabolic process	CF793647	889067 MARC 4PIG Sus scrofa cDNA 5', mRNA sequence						0.00198752	0.190195	0.543717
GO:0060255	regulation of macromolecule metabolic process	BX664960	BX664960 Sus Scrofa library (scag) Sus scrofa cDNA clone scag0008.d.11 3prim, mRNA sequence						0.00198752	0.190195	0.543717
GO:0060255	regulation of macromolecule metabolic process	CK452762	908422 MARC 4PIG Sus scrofa cDNA 5', mRNA sequence						0.00198752	0.190195	0.543717
GO:0060255	regulation of macromolecule metabolic process	CK461926	932690 MARC 4PIG Sus scrofa cDNA 5', mRNA sequence						0.00198752	0.190195	0.543717
GO:0060255	regulation of macromolecule metabolic process	CK467405	938702 MARC 4PIG Sus scrofa cDNA 5', mRNA sequence						0.00198752	0.190195	0.543717
GO:0060255	regulation of macromolecule metabolic process	CK467896	939242 MARC 4PIG Sus scrofa cDNA 5', mRNA sequence						0.00198752	0.190195	0.543717
GO:0060255	regulation of macromolecule metabolic process	BX915128	BX915128 Sus Scrofa library (scan) Sus scrofa cDNA clone scan0028.a.21 5prim, mRNA sequence						0.00198752	0.190195	0.543717
GO:0060255	regulation of macromolecule metabolic process	BX924453	BX924453 Sus Scrofa library (scan) Sus scrofa cDNA clone scan0016.m.23 5prim, mRNA sequence						0.00198752	0.190195	0.543717
GO:0060255	regulation of macromolecule metabolic process	CN158127	946898 MARC 4PIG Sus scrofa cDNA 5', mRNA sequence						0.00198752	0.190195	0.543717
GO:0060255	regulation of macromolecule metabolic process	CN164178	994302 MARC 4PIG Sus scrofa cDNA 5', mRNA sequence						0.00198752	0.190195	0.543717
GO:0060255	regulation of macromolecule metabolic process	DN120593	1120622 MARC 4PIG Sus scrofa cDNA 5', mRNA sequence						0.00198752	0.190195	0.543717
GO:0060255	regulation of macromolecule metabolic process	DN121268	1121355 MARC 4PIG Sus scrofa cDNA 3', mRNA sequence						0.00198752	0.190195	0.543717
GO:0060255	regulation of macromolecule metabolic process	CX057037	PDUts2009C04 Porcine testis cDNA library II Sus scrofa cDNA clone PDUts2009C04 5' similar to homologue to ref|NM_017826.1| Homo sapiens hypothetical protein FLJ20449 (FLJ20449), mRNA, mRNA sequence						0.00198752	0.190195	0.543717
GO:0060255	regulation of macromolecule metabolic process	EW417768	rnbm12b_c21.y1 nbm Sus scrofa cDNA 5', mRNA sequence						0.00198752	0.190195	0.543717
GO:0060255	regulation of macromolecule metabolic process	EW421594	rnca11b_e13.y1 nca Sus scrofa cDNA 5', mRNA sequence						0.00198752	0.190195	0.543717
GO:0060255	regulation of macromolecule metabolic process	EW464984	rnmm24c_m17.y1 nmm Sus scrofa cDNA 5', mRNA sequence						0.00198752	0.190195	0.543717
GO:0043687	post-translational protein modification	AK238982.1	Sus scrofa mRNA, clone:THY010053D09, expressed in thymus		DQ896646.2	65018	PINK1	PTEN induced putative kinase 1	0.00216571	0.203773	0.277946
GO:0043687	post-translational protein modification	CK462437	933235 MARC 4PIG Sus scrofa cDNA 3', mRNA sequence						0.00216571	0.203773	0.277946
GO:0043687	post-translational protein modification	CV876956	PDUts1158D11 Porcine testis cDNA library I Sus scrofa cDNA clone PDUts1158D11 5' similar to homologue to ref|NM_013233.1| Homo sapiens serine threonine kinase 39 (STE20/SPS1 homolog, yeast) (STK39), mRNA, mRNA sequence						0.00216571	0.203773	0.277946
GO:0043687	post-translational protein modification	DB788903	DB788903 full-length enriched swine cDNA library, adult adrenal gland Sus scrofa cDNA clone ADR010083F11 5', mRNA sequence						0.00216571	0.203773	0.277946
GO:0031326	regulation of cellular biosynthetic process	AK234633.1	Sus scrofa mRNA, clone:OVR010100E10, expressed in ovary		BC005295.1	10605	PAIP1	poly(A) binding protein interacting protein 1	0.00247598	0.226357	0.53387
GO:0009889	regulation of biosynthetic process	AK234633.1	Sus scrofa mRNA, clone:OVR010100E10, expressed in ovary		BC005295.1	10605	PAIP1	poly(A) binding protein interacting protein 1	0.00247598	0.226357	0.53387
GO:0009889	regulation of biosynthetic process	AK238657.1	Sus scrofa mRNA, clone:THY010014G12, expressed in thymus		NM_004514.3	3607	FOXK2	forkhead box K2	0.00247598	0.226357	0.53387
GO:0031326	regulation of cellular biosynthetic process	AK238657.1	Sus scrofa mRNA, clone:THY010014G12, expressed in thymus		NM_004514.3	3607	FOXK2	forkhead box K2	0.00247598	0.226357	0.53387
GO:0009889	regulation of biosynthetic process	AY609778.1	Sus scrofa clone Clu_30724.scr.msk.p1.Contig4, mRNA sequence		CR616160.1	11267	SNF8	SNF8, ESCRT-II complex subunit, homolog (S. cerevisiae)	0.00247598	0.226357	0.53387
GO:0031326	regulation of cellular biosynthetic process	AY609778.1	Sus scrofa clone Clu_30724.scr.msk.p1.Contig4, mRNA sequence		CR616160.1	11267	SNF8	SNF8, ESCRT-II complex subunit, homolog (S. cerevisiae)	0.00247598	0.226357	0.53387
GO:0009889	regulation of biosynthetic process	AY610090.1	Sus scrofa clone Clu_67806.scr.msk.p1.Contig1, mRNA sequence		AK001171.1	84337	ELOF1	elongation factor 1 homolog (S. cerevisiae)	0.00247598	0.226357	0.53387
GO:0031326	regulation of cellular biosynthetic process	AY610090.1	Sus scrofa clone Clu_67806.scr.msk.p1.Contig1, mRNA sequence		AK001171.1	84337	ELOF1	elongation factor 1 homolog (S. cerevisiae)	0.00247598	0.226357	0.53387
GO:0031326	regulation of cellular biosynthetic process	CF793647	889067 MARC 4PIG Sus scrofa cDNA 5', mRNA sequence						0.00247598	0.226357	0.53387
GO:0009889	regulation of biosynthetic process	CF793647	889067 MARC 4PIG Sus scrofa cDNA 5', mRNA sequence						0.00247598	0.226357	0.53387
GO:0031326	regulation of cellular biosynthetic process	BX664960	BX664960 Sus Scrofa library (scag) Sus scrofa cDNA clone scag0008.d.11 3prim, mRNA sequence						0.00247598	0.226357	0.53387
GO:0009889	regulation of biosynthetic process	BX664960	BX664960 Sus Scrofa library (scag) Sus scrofa cDNA clone scag0008.d.11 3prim, mRNA sequence						0.00247598	0.226357	0.53387
GO:0009889	regulation of biosynthetic process	CK452762	908422 MARC 4PIG Sus scrofa cDNA 5', mRNA sequence						0.00247598	0.226357	0.53387
GO:0031326	regulation of cellular biosynthetic process	CK452762	908422 MARC 4PIG Sus scrofa cDNA 5', mRNA sequence						0.00247598	0.226357	0.53387
GO:0031326	regulation of cellular biosynthetic process	CK461926	932690 MARC 4PIG Sus scrofa cDNA 5', mRNA sequence						0.00247598	0.226357	0.53387
GO:0009889	regulation of biosynthetic process	CK461926	932690 MARC 4PIG Sus scrofa cDNA 5', mRNA sequence						0.00247598	0.226357	0.53387
GO:0009889	regulation of biosynthetic process	CK467405	938702 MARC 4PIG Sus scrofa cDNA 5', mRNA sequence						0.00247598	0.226357	0.53387
GO:0031326	regulation of cellular biosynthetic process	CK467405	938702 MARC 4PIG Sus scrofa cDNA 5', mRNA sequence						0.00247598	0.226357	0.53387
GO:0009889	regulation of biosynthetic process	CK467896	939242 MARC 4PIG Sus scrofa cDNA 5', mRNA sequence						0.00247598	0.226357	0.53387
GO:0031326	regulation of cellular biosynthetic process	CK467896	939242 MARC 4PIG Sus scrofa cDNA 5', mRNA sequence						0.00247598	0.226357	0.53387
GO:0009889	regulation of biosynthetic process	BX915128	BX915128 Sus Scrofa library (scan) Sus scrofa cDNA clone scan0028.a.21 5prim, mRNA sequence						0.00247598	0.226357	0.53387
GO:0031326	regulation of cellular biosynthetic process	BX915128	BX915128 Sus Scrofa library (scan) Sus scrofa cDNA clone scan0028.a.21 5prim, mRNA sequence						0.00247598	0.226357	0.53387
GO:0009889	regulation of biosynthetic process	BX924453	BX924453 Sus Scrofa library (scan) Sus scrofa cDNA clone scan0016.m.23 5prim, mRNA sequence						0.00247598	0.226357	0.53387
GO:0031326	regulation of cellular biosynthetic process	BX924453	BX924453 Sus Scrofa library (scan) Sus scrofa cDNA clone scan0016.m.23 5prim, mRNA sequence						0.00247598	0.226357	0.53387
GO:0009889	regulation of biosynthetic process	CN158127	946898 MARC 4PIG Sus scrofa cDNA 5', mRNA sequence						0.00247598	0.226357	0.53387
GO:0031326	regulation of cellular biosynthetic process	CN158127	946898 MARC 4PIG Sus scrofa cDNA 5', mRNA sequence						0.00247598	0.226357	0.53387
GO:0031326	regulation of cellular biosynthetic process	CN164178	994302 MARC 4PIG Sus scrofa cDNA 5', mRNA sequence						0.00247598	0.226357	0.53387
GO:0009889	regulation of biosynthetic process	CN164178	994302 MARC 4PIG Sus scrofa cDNA 5', mRNA sequence						0.00247598	0.226357	0.53387
GO:0031326	regulation of cellular biosynthetic process	DN121268	1121355 MARC 4PIG Sus scrofa cDNA 3', mRNA sequence						0.00247598	0.226357	0.53387
GO:0009889	regulation of biosynthetic process	DN121268	1121355 MARC 4PIG Sus scrofa cDNA 3', mRNA sequence						0.00247598	0.226357	0.53387
GO:0009889	regulation of biosynthetic process	CX057037	PDUts2009C04 Porcine testis cDNA library II Sus scrofa cDNA clone PDUts2009C04 5' similar to homologue to ref|NM_017826.1| Homo sapiens hypothetical protein FLJ20449 (FLJ20449), mRNA, mRNA sequence						0.00247598	0.226357	0.53387
GO:0031326	regulation of cellular biosynthetic process	CX057037	PDUts2009C04 Porcine testis cDNA library II Sus scrofa cDNA clone PDUts2009C04 5' similar to homologue to ref|NM_017826.1| Homo sapiens hypothetical protein FLJ20449 (FLJ20449), mRNA, mRNA sequence						0.00247598	0.226357	0.53387
GO:0009889	regulation of biosynthetic process	EW417768	rnbm12b_c21.y1 nbm Sus scrofa cDNA 5', mRNA sequence						0.00247598	0.226357	0.53387
GO:0031326	regulation of cellular biosynthetic process	EW417768	rnbm12b_c21.y1 nbm Sus scrofa cDNA 5', mRNA sequence						0.00247598	0.226357	0.53387
GO:0031326	regulation of cellular biosynthetic process	EW421594	rnca11b_e13.y1 nca Sus scrofa cDNA 5', mRNA sequence						0.00247598	0.226357	0.53387
GO:0009889	regulation of biosynthetic process	EW421594	rnca11b_e13.y1 nca Sus scrofa cDNA 5', mRNA sequence						0.00247598	0.226357	0.53387
GO:0031326	regulation of cellular biosynthetic process	EW464984	rnmm24c_m17.y1 nmm Sus scrofa cDNA 5', mRNA sequence						0.00247598	0.226357	0.53387
GO:0009889	regulation of biosynthetic process	EW464984	rnmm24c_m17.y1 nmm Sus scrofa cDNA 5', mRNA sequence						0.00247598	0.226357	0.53387
GO:0007165	signal transduction	AK235171.1	Sus scrofa mRNA, clone:OVRM10055D04, expressed in ovary		AF087894.1	23564	DDAH2	dimethylarginine dimethylaminohydrolase 2	0.00268481	0.240851	0.508481
GO:0007165	signal transduction	AK235751.1	Sus scrofa mRNA, clone:OVRM10111E07, expressed in ovary		NM_004323.4	573	BAG1	BCL2-associated athanogene	0.00268481	0.240851	0.508481
GO:0007165	signal transduction	AK232555.1	Sus scrofa mRNA, clone:LVR010073A12, expressed in liver		NM_004208.2	9131	AIFM1	apoptosis-inducing factor, mitochondrion-associated, 1	0.00268481	0.240851	0.508481
GO:0007165	signal transduction	AK238982.1	Sus scrofa mRNA, clone:THY010053D09, expressed in thymus		DQ896646.2	65018	PINK1	PTEN induced putative kinase 1	0.00268481	0.240851	0.508481
GO:0007165	signal transduction	AK236416.1	Sus scrofa mRNA, clone:OVRM10189H07, expressed in ovary		NM_001071.2	7298	TYMS	thymidylate synthetase	0.00268481	0.240851	0.508481
GO:0007165	signal transduction	AY609666.1	Sus scrofa clone Clu_24219.scr.msk.p1.Contig4, mRNA sequence		NM_016041.3	51009	DERL2	Der1-like domain family, member 2	0.00268481	0.240851	0.508481
GO:0007165	signal transduction	AY610394.1	Sus scrofa clone reru31c_i7.y1.abd, mRNA sequence		NM_002495.2	4724	NDUFS4	NADH dehydrogenase (ubiquinone) Fe-S protein 4, 18kDa (NADH-coenzyme Q reductase)	0.00268481	0.240851	0.508481
GO:0007165	signal transduction	BX923538	BX923538 Sus Scrofa library (scan) Sus scrofa cDNA clone scan0014.h.08 5prim, mRNA sequence						0.00268481	0.240851	0.508481
GO:0007165	signal transduction	CN157951	946698 MARC 4PIG Sus scrofa cDNA 5', mRNA sequence						0.00268481	0.240851	0.508481
GO:0007165	signal transduction	CN164178	994302 MARC 4PIG Sus scrofa cDNA 5', mRNA sequence						0.00268481	0.240851	0.508481
GO:0007165	signal transduction	DN120593	1120622 MARC 4PIG Sus scrofa cDNA 5', mRNA sequence						0.00268481	0.240851	0.508481
GO:0007165	signal transduction	DN121268	1121355 MARC 4PIG Sus scrofa cDNA 3', mRNA sequence						0.00268481	0.240851	0.508481
GO:0007165	signal transduction	EW089566	recc2817c_e7.y1 ecc Sus scrofa cDNA 5', mRNA sequence						0.00268481	0.240851	0.508481
GO:0007165	signal transduction	EW144888	rese17c_m9.y1 ese Sus scrofa cDNA 5', mRNA sequence						0.00268481	0.240851	0.508481
GO:0007165	signal transduction	EW421594	rnca11b_e13.y1 nca Sus scrofa cDNA 5', mRNA sequence						0.00268481	0.240851	0.508481
GO:0007165	signal transduction	BE014011	125574 MARC 1PIG Sus scrofa cDNA 5', mRNA sequence						0.00268481	0.240851	0.508481
GO:0010556	regulation of macromolecule biosynthetic process	AK234633.1	Sus scrofa mRNA, clone:OVR010100E10, expressed in ovary		BC005295.1	10605	PAIP1	poly(A) binding protein interacting protein 1	0.0028568	0.252386	0.537986
GO:0010556	regulation of macromolecule biosynthetic process	AK238657.1	Sus scrofa mRNA, clone:THY010014G12, expressed in thymus		NM_004514.3	3607	FOXK2	forkhead box K2	0.0028568	0.252386	0.537986
GO:0010556	regulation of macromolecule biosynthetic process	AY609778.1	Sus scrofa clone Clu_30724.scr.msk.p1.Contig4, mRNA sequence		CR616160.1	11267	SNF8	SNF8, ESCRT-II complex subunit, homolog (S. cerevisiae)	0.0028568	0.252386	0.537986
GO:0010556	regulation of macromolecule biosynthetic process	AY610090.1	Sus scrofa clone Clu_67806.scr.msk.p1.Contig1, mRNA sequence		AK001171.1	84337	ELOF1	elongation factor 1 homolog (S. cerevisiae)	0.0028568	0.252386	0.537986
GO:0010556	regulation of macromolecule biosynthetic process	CF793647	889067 MARC 4PIG Sus scrofa cDNA 5', mRNA sequence						0.0028568	0.252386	0.537986
GO:0010556	regulation of macromolecule biosynthetic process	BX664960	BX664960 Sus Scrofa library (scag) Sus scrofa cDNA clone scag0008.d.11 3prim, mRNA sequence						0.0028568	0.252386	0.537986
GO:0010556	regulation of macromolecule biosynthetic process	CK452762	908422 MARC 4PIG Sus scrofa cDNA 5', mRNA sequence						0.0028568	0.252386	0.537986
GO:0010556	regulation of macromolecule biosynthetic process	CK461926	932690 MARC 4PIG Sus scrofa cDNA 5', mRNA sequence						0.0028568	0.252386	0.537986
GO:0010556	regulation of macromolecule biosynthetic process	CK467405	938702 MARC 4PIG Sus scrofa cDNA 5', mRNA sequence						0.0028568	0.252386	0.537986
GO:0010556	regulation of macromolecule biosynthetic process	CK467896	939242 MARC 4PIG Sus scrofa cDNA 5', mRNA sequence						0.0028568	0.252386	0.537986
GO:0010556	regulation of macromolecule biosynthetic process	BX915128	BX915128 Sus Scrofa library (scan) Sus scrofa cDNA clone scan0028.a.21 5prim, mRNA sequence						0.0028568	0.252386	0.537986
GO:0010556	regulation of macromolecule biosynthetic process	BX924453	BX924453 Sus Scrofa library (scan) Sus scrofa cDNA clone scan0016.m.23 5prim, mRNA sequence						0.0028568	0.252386	0.537986
GO:0010556	regulation of macromolecule biosynthetic process	CN158127	946898 MARC 4PIG Sus scrofa cDNA 5', mRNA sequence						0.0028568	0.252386	0.537986
GO:0010556	regulation of macromolecule biosynthetic process	CN164178	994302 MARC 4PIG Sus scrofa cDNA 5', mRNA sequence						0.0028568	0.252386	0.537986
GO:0010556	regulation of macromolecule biosynthetic process	DN121268	1121355 MARC 4PIG Sus scrofa cDNA 3', mRNA sequence						0.0028568	0.252386	0.537986
GO:0010556	regulation of macromolecule biosynthetic process	CX057037	PDUts2009C04 Porcine testis cDNA library II Sus scrofa cDNA clone PDUts2009C04 5' similar to homologue to ref|NM_017826.1| Homo sapiens hypothetical protein FLJ20449 (FLJ20449), mRNA, mRNA sequence						0.0028568	0.252386	0.537986
GO:0010556	regulation of macromolecule biosynthetic process	EW417768	rnbm12b_c21.y1 nbm Sus scrofa cDNA 5', mRNA sequence						0.0028568	0.252386	0.537986
GO:0010556	regulation of macromolecule biosynthetic process	EW421594	rnca11b_e13.y1 nca Sus scrofa cDNA 5', mRNA sequence						0.0028568	0.252386	0.537986
GO:0010556	regulation of macromolecule biosynthetic process	EW464984	rnmm24c_m17.y1 nmm Sus scrofa cDNA 5', mRNA sequence						0.0028568	0.252386	0.537986
GO:0006120	mitochondrial electron transport, NADH to ubiquinone	AK236182.1	Sus scrofa mRNA, clone:OVRM10161E01, expressed in ovary		NM_005006.5	4719	NDUFS1	NADH dehydrogenase (ubiquinone) Fe-S protein 1, 75kDa (NADH-coenzyme Q reductase)	0.00302237	0.263164	25.71
GO:0006120	mitochondrial electron transport, NADH to ubiquinone	AK236752.1	Sus scrofa mRNA, clone:OVRM10224E06, expressed in ovary		NM_005003.2	4706	NDUFAB1	NADH dehydrogenase (ubiquinone) 1, alpha/beta subcomplex, 1, 8kDa	0.00302237	0.263164	25.71
GO:0010468	regulation of gene expression	AK234633.1	Sus scrofa mRNA, clone:OVR010100E10, expressed in ovary		BC005295.1	10605	PAIP1	poly(A) binding protein interacting protein 1	0.00364152	0.300855	0.545191
GO:0010468	regulation of gene expression	AK238657.1	Sus scrofa mRNA, clone:THY010014G12, expressed in thymus		NM_004514.3	3607	FOXK2	forkhead box K2	0.00364152	0.300855	0.545191
GO:0010468	regulation of gene expression	AY609778.1	Sus scrofa clone Clu_30724.scr.msk.p1.Contig4, mRNA sequence		CR616160.1	11267	SNF8	SNF8, ESCRT-II complex subunit, homolog (S. cerevisiae)	0.00364152	0.300855	0.545191
GO:0010468	regulation of gene expression	AY610090.1	Sus scrofa clone Clu_67806.scr.msk.p1.Contig1, mRNA sequence		AK001171.1	84337	ELOF1	elongation factor 1 homolog (S. cerevisiae)	0.00364152	0.300855	0.545191
GO:0010468	regulation of gene expression	CF793647	889067 MARC 4PIG Sus scrofa cDNA 5', mRNA sequence						0.00364152	0.300855	0.545191
GO:0010468	regulation of gene expression	BX664960	BX664960 Sus Scrofa library (scag) Sus scrofa cDNA clone scag0008.d.11 3prim, mRNA sequence						0.00364152	0.300855	0.545191
GO:0010468	regulation of gene expression	CK452762	908422 MARC 4PIG Sus scrofa cDNA 5', mRNA sequence						0.00364152	0.300855	0.545191
GO:0010468	regulation of gene expression	CK461926	932690 MARC 4PIG Sus scrofa cDNA 5', mRNA sequence						0.00364152	0.300855	0.545191
GO:0010468	regulation of gene expression	CK467405	938702 MARC 4PIG Sus scrofa cDNA 5', mRNA sequence						0.00364152	0.300855	0.545191
GO:0010468	regulation of gene expression	CK467896	939242 MARC 4PIG Sus scrofa cDNA 5', mRNA sequence						0.00364152	0.300855	0.545191
GO:0010468	regulation of gene expression	BX915128	BX915128 Sus Scrofa library (scan) Sus scrofa cDNA clone scan0028.a.21 5prim, mRNA sequence						0.00364152	0.300855	0.545191
GO:0010468	regulation of gene expression	BX924453	BX924453 Sus Scrofa library (scan) Sus scrofa cDNA clone scan0016.m.23 5prim, mRNA sequence						0.00364152	0.300855	0.545191
GO:0010468	regulation of gene expression	CN158127	946898 MARC 4PIG Sus scrofa cDNA 5', mRNA sequence						0.00364152	0.300855	0.545191
GO:0010468	regulation of gene expression	DN121268	1121355 MARC 4PIG Sus scrofa cDNA 3', mRNA sequence						0.00364152	0.300855	0.545191
GO:0010468	regulation of gene expression	DR120938	COG3c1 Pig pBluescript and pTrueBlue library Sus scrofa cDNA 5', mRNA sequence						0.00364152	0.300855	0.545191
GO:0010468	regulation of gene expression	CX057037	PDUts2009C04 Porcine testis cDNA library II Sus scrofa cDNA clone PDUts2009C04 5' similar to homologue to ref|NM_017826.1| Homo sapiens hypothetical protein FLJ20449 (FLJ20449), mRNA, mRNA sequence						0.00364152	0.300855	0.545191
GO:0010468	regulation of gene expression	EW417768	rnbm12b_c21.y1 nbm Sus scrofa cDNA 5', mRNA sequence						0.00364152	0.300855	0.545191
GO:0010468	regulation of gene expression	EW421594	rnca11b_e13.y1 nca Sus scrofa cDNA 5', mRNA sequence						0.00364152	0.300855	0.545191
GO:0010468	regulation of gene expression	EW464984	rnmm24c_m17.y1 nmm Sus scrofa cDNA 5', mRNA sequence						0.00364152	0.300855	0.545191
GO:0050790	regulation of catalytic activity	EW407282	rmgp039_f21.y1 mgp Sus scrofa cDNA 5', mRNA sequence						0.00398531	0.320164	0.120704
GO:0006355	regulation of transcription, DNA-dependent	AK238657.1	Sus scrofa mRNA, clone:THY010014G12, expressed in thymus		NM_004514.3	3607	FOXK2	forkhead box K2	0.00503245	0.372917	0.506246
GO:0006355	regulation of transcription, DNA-dependent	AY609778.1	Sus scrofa clone Clu_30724.scr.msk.p1.Contig4, mRNA sequence		CR616160.1	11267	SNF8	SNF8, ESCRT-II complex subunit, homolog (S. cerevisiae)	0.00503245	0.372917	0.506246
GO:0006355	regulation of transcription, DNA-dependent	AY610090.1	Sus scrofa clone Clu_67806.scr.msk.p1.Contig1, mRNA sequence		AK001171.1	84337	ELOF1	elongation factor 1 homolog (S. cerevisiae)	0.00503245	0.372917	0.506246
GO:0006355	regulation of transcription, DNA-dependent	CF793647	889067 MARC 4PIG Sus scrofa cDNA 5', mRNA sequence						0.00503245	0.372917	0.506246
GO:0006355	regulation of transcription, DNA-dependent	BX664960	BX664960 Sus Scrofa library (scag) Sus scrofa cDNA clone scag0008.d.11 3prim, mRNA sequence						0.00503245	0.372917	0.506246
GO:0006355	regulation of transcription, DNA-dependent	CK452762	908422 MARC 4PIG Sus scrofa cDNA 5', mRNA sequence						0.00503245	0.372917	0.506246
GO:0006355	regulation of transcription, DNA-dependent	CK461926	932690 MARC 4PIG Sus scrofa cDNA 5', mRNA sequence						0.00503245	0.372917	0.506246
GO:0006355	regulation of transcription, DNA-dependent	CK467896	939242 MARC 4PIG Sus scrofa cDNA 5', mRNA sequence						0.00503245	0.372917	0.506246
GO:0006355	regulation of transcription, DNA-dependent	BX915128	BX915128 Sus Scrofa library (scan) Sus scrofa cDNA clone scan0028.a.21 5prim, mRNA sequence						0.00503245	0.372917	0.506246
GO:0006355	regulation of transcription, DNA-dependent	BX924453	BX924453 Sus Scrofa library (scan) Sus scrofa cDNA clone scan0016.m.23 5prim, mRNA sequence						0.00503245	0.372917	0.506246
GO:0006355	regulation of transcription, DNA-dependent	CN158127	946898 MARC 4PIG Sus scrofa cDNA 5', mRNA sequence						0.00503245	0.372917	0.506246
GO:0006355	regulation of transcription, DNA-dependent	CX057037	PDUts2009C04 Porcine testis cDNA library II Sus scrofa cDNA clone PDUts2009C04 5' similar to homologue to ref|NM_017826.1| Homo sapiens hypothetical protein FLJ20449 (FLJ20449), mRNA, mRNA sequence						0.00503245	0.372917	0.506246
GO:0006355	regulation of transcription, DNA-dependent	EW417768	rnbm12b_c21.y1 nbm Sus scrofa cDNA 5', mRNA sequence						0.00503245	0.372917	0.506246
GO:0006355	regulation of transcription, DNA-dependent	EW421594	rnca11b_e13.y1 nca Sus scrofa cDNA 5', mRNA sequence						0.00503245	0.372917	0.506246
GO:0045449	regulation of transcription	AK238657.1	Sus scrofa mRNA, clone:THY010014G12, expressed in thymus		NM_004514.3	3607	FOXK2	forkhead box K2	0.00524045	0.382435	0.538928
GO:0045449	regulation of transcription	AY609778.1	Sus scrofa clone Clu_30724.scr.msk.p1.Contig4, mRNA sequence		CR616160.1	11267	SNF8	SNF8, ESCRT-II complex subunit, homolog (S. cerevisiae)	0.00524045	0.382435	0.538928
GO:0045449	regulation of transcription	AY610090.1	Sus scrofa clone Clu_67806.scr.msk.p1.Contig1, mRNA sequence		AK001171.1	84337	ELOF1	elongation factor 1 homolog (S. cerevisiae)	0.00524045	0.382435	0.538928
GO:0045449	regulation of transcription	CF793647	889067 MARC 4PIG Sus scrofa cDNA 5', mRNA sequence						0.00524045	0.382435	0.538928
GO:0045449	regulation of transcription	BX664960	BX664960 Sus Scrofa library (scag) Sus scrofa cDNA clone scag0008.d.11 3prim, mRNA sequence						0.00524045	0.382435	0.538928
GO:0045449	regulation of transcription	CK452762	908422 MARC 4PIG Sus scrofa cDNA 5', mRNA sequence						0.00524045	0.382435	0.538928
GO:0045449	regulation of transcription	CK461926	932690 MARC 4PIG Sus scrofa cDNA 5', mRNA sequence						0.00524045	0.382435	0.538928
GO:0045449	regulation of transcription	CK467405	938702 MARC 4PIG Sus scrofa cDNA 5', mRNA sequence						0.00524045	0.382435	0.538928
GO:0045449	regulation of transcription	CK467896	939242 MARC 4PIG Sus scrofa cDNA 5', mRNA sequence						0.00524045	0.382435	0.538928
GO:0045449	regulation of transcription	BX915128	BX915128 Sus Scrofa library (scan) Sus scrofa cDNA clone scan0028.a.21 5prim, mRNA sequence						0.00524045	0.382435	0.538928
GO:0045449	regulation of transcription	BX924453	BX924453 Sus Scrofa library (scan) Sus scrofa cDNA clone scan0016.m.23 5prim, mRNA sequence						0.00524045	0.382435	0.538928
GO:0045449	regulation of transcription	CN158127	946898 MARC 4PIG Sus scrofa cDNA 5', mRNA sequence						0.00524045	0.382435	0.538928
GO:0045449	regulation of transcription	DN121268	1121355 MARC 4PIG Sus scrofa cDNA 3', mRNA sequence						0.00524045	0.382435	0.538928
GO:0045449	regulation of transcription	CX057037	PDUts2009C04 Porcine testis cDNA library II Sus scrofa cDNA clone PDUts2009C04 5' similar to homologue to ref|NM_017826.1| Homo sapiens hypothetical protein FLJ20449 (FLJ20449), mRNA, mRNA sequence						0.00524045	0.382435	0.538928
GO:0045449	regulation of transcription	EW417768	rnbm12b_c21.y1 nbm Sus scrofa cDNA 5', mRNA sequence						0.00524045	0.382435	0.538928
GO:0045449	regulation of transcription	EW421594	rnca11b_e13.y1 nca Sus scrofa cDNA 5', mRNA sequence						0.00524045	0.382435	0.538928
GO:0045449	regulation of transcription	EW464984	rnmm24c_m17.y1 nmm Sus scrofa cDNA 5', mRNA sequence						0.00524045	0.382435	0.538928
GO:0003012	muscle system process	AK240563.1	Sus scrofa mRNA, clone:UTR010098F11, expressed in uterus		NM_001165928.1	1605	DAG1	dystroglycan 1 (dystrophin-associated glycoprotein 1)	0.00765245	0.47487	3.46097
GO:0006936	muscle contraction	AK240563.1	Sus scrofa mRNA, clone:UTR010098F11, expressed in uterus		NM_001165928.1	1605	DAG1	dystroglycan 1 (dystrophin-associated glycoprotein 1)	0.00765245	0.47487	3.46097
GO:0006936	muscle contraction	AK239436.1	Sus scrofa mRNA, clone:THY010103G12, expressed in thymus		NM_003803.3	8736	MYOM1	myomesin 1, 185kDa	0.00765245	0.47487	3.46097
GO:0003012	muscle system process	AK239436.1	Sus scrofa mRNA, clone:THY010103G12, expressed in thymus		NM_003803.3	8736	MYOM1	myomesin 1, 185kDa	0.00765245	0.47487	3.46097
GO:0006936	muscle contraction	CK454645	915140 MARC 4PIG Sus scrofa cDNA 5', mRNA sequence						0.00765245	0.47487	3.46097
GO:0003012	muscle system process	CK454645	915140 MARC 4PIG Sus scrofa cDNA 5', mRNA sequence						0.00765245	0.47487	3.46097
GO:0006936	muscle contraction	BX922054	BX922054 Sus Scrofa library (scan) Sus scrofa cDNA clone scan0023.e.20 5prim, mRNA sequence						0.00765245	0.47487	3.46097
GO:0003012	muscle system process	BX922054	BX922054 Sus Scrofa library (scan) Sus scrofa cDNA clone scan0023.e.20 5prim, mRNA sequence						0.00765245	0.47487	3.46097
GO:0003012	muscle system process	BX925993	BX925993 Sus Scrofa library (scan) Sus scrofa cDNA clone scan0021.f.19 5prim, mRNA sequence						0.00765245	0.47487	3.46097
GO:0006936	muscle contraction	BX925993	BX925993 Sus Scrofa library (scan) Sus scrofa cDNA clone scan0021.f.19 5prim, mRNA sequence						0.00765245	0.47487	3.46097
GO:0006936	muscle contraction	CN163858	993962 MARC 4PIG Sus scrofa cDNA 5', mRNA sequence						0.00765245	0.47487	3.46097
GO:0003012	muscle system process	CN163858	993962 MARC 4PIG Sus scrofa cDNA 5', mRNA sequence						0.00765245	0.47487	3.46097
GO:0006936	muscle contraction	EW055180	rpigcb_10659.y1 cty Sus scrofa cDNA 5', mRNA sequence						0.00765245	0.47487	3.46097
GO:0003012	muscle system process	EW055180	rpigcb_10659.y1 cty Sus scrofa cDNA 5', mRNA sequence						0.00765245	0.47487	3.46097
GO:0051252	regulation of RNA metabolic process	AK238657.1	Sus scrofa mRNA, clone:THY010014G12, expressed in thymus		NM_004514.3	3607	FOXK2	forkhead box K2	0.00801131	0.486309	0.533403
GO:0051252	regulation of RNA metabolic process	AY609778.1	Sus scrofa clone Clu_30724.scr.msk.p1.Contig4, mRNA sequence		CR616160.1	11267	SNF8	SNF8, ESCRT-II complex subunit, homolog (S. cerevisiae)	0.00801131	0.486309	0.533403
GO:0051252	regulation of RNA metabolic process	AY610090.1	Sus scrofa clone Clu_67806.scr.msk.p1.Contig1, mRNA sequence		AK001171.1	84337	ELOF1	elongation factor 1 homolog (S. cerevisiae)	0.00801131	0.486309	0.533403
GO:0051252	regulation of RNA metabolic process	CF793647	889067 MARC 4PIG Sus scrofa cDNA 5', mRNA sequence						0.00801131	0.486309	0.533403
GO:0051252	regulation of RNA metabolic process	BX664960	BX664960 Sus Scrofa library (scag) Sus scrofa cDNA clone scag0008.d.11 3prim, mRNA sequence						0.00801131	0.486309	0.533403
GO:0051252	regulation of RNA metabolic process	CK452762	908422 MARC 4PIG Sus scrofa cDNA 5', mRNA sequence						0.00801131	0.486309	0.533403
GO:0051252	regulation of RNA metabolic process	CK461926	932690 MARC 4PIG Sus scrofa cDNA 5', mRNA sequence						0.00801131	0.486309	0.533403
GO:0051252	regulation of RNA metabolic process	CK467896	939242 MARC 4PIG Sus scrofa cDNA 5', mRNA sequence						0.00801131	0.486309	0.533403
GO:0051252	regulation of RNA metabolic process	BX915128	BX915128 Sus Scrofa library (scan) Sus scrofa cDNA clone scan0028.a.21 5prim, mRNA sequence						0.00801131	0.486309	0.533403
GO:0051252	regulation of RNA metabolic process	BX924453	BX924453 Sus Scrofa library (scan) Sus scrofa cDNA clone scan0016.m.23 5prim, mRNA sequence						0.00801131	0.486309	0.533403
GO:0051252	regulation of RNA metabolic process	CN158127	946898 MARC 4PIG Sus scrofa cDNA 5', mRNA sequence						0.00801131	0.486309	0.533403
GO:0051252	regulation of RNA metabolic process	DN120593	1120622 MARC 4PIG Sus scrofa cDNA 5', mRNA sequence						0.00801131	0.486309	0.533403
GO:0051252	regulation of RNA metabolic process	CX057037	PDUts2009C04 Porcine testis cDNA library II Sus scrofa cDNA clone PDUts2009C04 5' similar to homologue to ref|NM_017826.1| Homo sapiens hypothetical protein FLJ20449 (FLJ20449), mRNA, mRNA sequence						0.00801131	0.486309	0.533403
GO:0051252	regulation of RNA metabolic process	EW417768	rnbm12b_c21.y1 nbm Sus scrofa cDNA 5', mRNA sequence						0.00801131	0.486309	0.533403
GO:0051252	regulation of RNA metabolic process	EW421594	rnca11b_e13.y1 nca Sus scrofa cDNA 5', mRNA sequence						0.00801131	0.486309	0.533403
GO:0006955	immune response	CN164178	994302 MARC 4PIG Sus scrofa cDNA 5', mRNA sequence						0.00935518	0.525054	0.136032
GO:0019219	regulation of nucleobase, nucleoside, nucleotide and nucleic acid metabolic process	AK238657.1	Sus scrofa mRNA, clone:THY010014G12, expressed in thymus		NM_004514.3	3607	FOXK2	forkhead box K2	0.00983906	0.537611	0.578096
GO:0019219	regulation of nucleobase, nucleoside, nucleotide and nucleic acid metabolic process	AK239756.1	Sus scrofa mRNA, clone:THY010202F01, expressed in thymus		BC004465.1	54386	TERF2IP	telomeric repeat binding factor 2, interacting protein	0.00983906	0.537611	0.578096
GO:0019219	regulation of nucleobase, nucleoside, nucleotide and nucleic acid metabolic process	AY609778.1	Sus scrofa clone Clu_30724.scr.msk.p1.Contig4, mRNA sequence		CR616160.1	11267	SNF8	SNF8, ESCRT-II complex subunit, homolog (S. cerevisiae)	0.00983906	0.537611	0.578096
GO:0019219	regulation of nucleobase, nucleoside, nucleotide and nucleic acid metabolic process	AY610090.1	Sus scrofa clone Clu_67806.scr.msk.p1.Contig1, mRNA sequence		AK001171.1	84337	ELOF1	elongation factor 1 homolog (S. cerevisiae)	0.00983906	0.537611	0.578096
GO:0019219	regulation of nucleobase, nucleoside, nucleotide and nucleic acid metabolic process	CF793647	889067 MARC 4PIG Sus scrofa cDNA 5', mRNA sequence						0.00983906	0.537611	0.578096
GO:0019219	regulation of nucleobase, nucleoside, nucleotide and nucleic acid metabolic process	BX664960	BX664960 Sus Scrofa library (scag) Sus scrofa cDNA clone scag0008.d.11 3prim, mRNA sequence						0.00983906	0.537611	0.578096
GO:0019219	regulation of nucleobase, nucleoside, nucleotide and nucleic acid metabolic process	CK452762	908422 MARC 4PIG Sus scrofa cDNA 5', mRNA sequence						0.00983906	0.537611	0.578096
GO:0019219	regulation of nucleobase, nucleoside, nucleotide and nucleic acid metabolic process	CK461926	932690 MARC 4PIG Sus scrofa cDNA 5', mRNA sequence						0.00983906	0.537611	0.578096
GO:0019219	regulation of nucleobase, nucleoside, nucleotide and nucleic acid metabolic process	CK467405	938702 MARC 4PIG Sus scrofa cDNA 5', mRNA sequence						0.00983906	0.537611	0.578096
GO:0019219	regulation of nucleobase, nucleoside, nucleotide and nucleic acid metabolic process	CK467896	939242 MARC 4PIG Sus scrofa cDNA 5', mRNA sequence						0.00983906	0.537611	0.578096
GO:0019219	regulation of nucleobase, nucleoside, nucleotide and nucleic acid metabolic process	BX915128	BX915128 Sus Scrofa library (scan) Sus scrofa cDNA clone scan0028.a.21 5prim, mRNA sequence						0.00983906	0.537611	0.578096
GO:0019219	regulation of nucleobase, nucleoside, nucleotide and nucleic acid metabolic process	BX924453	BX924453 Sus Scrofa library (scan) Sus scrofa cDNA clone scan0016.m.23 5prim, mRNA sequence						0.00983906	0.537611	0.578096
GO:0019219	regulation of nucleobase, nucleoside, nucleotide and nucleic acid metabolic process	CN158127	946898 MARC 4PIG Sus scrofa cDNA 5', mRNA sequence						0.00983906	0.537611	0.578096
GO:0019219	regulation of nucleobase, nucleoside, nucleotide and nucleic acid metabolic process	DN120593	1120622 MARC 4PIG Sus scrofa cDNA 5', mRNA sequence						0.00983906	0.537611	0.578096
GO:0019219	regulation of nucleobase, nucleoside, nucleotide and nucleic acid metabolic process	DN121268	1121355 MARC 4PIG Sus scrofa cDNA 3', mRNA sequence						0.00983906	0.537611	0.578096
GO:0019219	regulation of nucleobase, nucleoside, nucleotide and nucleic acid metabolic process	CX057037	PDUts2009C04 Porcine testis cDNA library II Sus scrofa cDNA clone PDUts2009C04 5' similar to homologue to ref|NM_017826.1| Homo sapiens hypothetical protein FLJ20449 (FLJ20449), mRNA, mRNA sequence						0.00983906	0.537611	0.578096
GO:0019219	regulation of nucleobase, nucleoside, nucleotide and nucleic acid metabolic process	EW417768	rnbm12b_c21.y1 nbm Sus scrofa cDNA 5', mRNA sequence						0.00983906	0.537611	0.578096
GO:0019219	regulation of nucleobase, nucleoside, nucleotide and nucleic acid metabolic process	EW421594	rnca11b_e13.y1 nca Sus scrofa cDNA 5', mRNA sequence						0.00983906	0.537611	0.578096
GO:0019219	regulation of nucleobase, nucleoside, nucleotide and nucleic acid metabolic process	EW464984	rnmm24c_m17.y1 nmm Sus scrofa cDNA 5', mRNA sequence						0.00983906	0.537611	0.578096
GO:0006464	protein modification process	AK230890.1	Sus scrofa mRNA, clone:AMP010059F12, expressed in alveolar macrophage		NM_003968.3	9039	UBA3	ubiquitin-like modifier activating enzyme 3	0.0122769	0.591964	0.446161
GO:0006464	protein modification process	AK236028.1	Sus scrofa mRNA, clone:OVRM10140A03, expressed in ovary		AY358465.1	11253	MAN1B1	mannosidase, alpha, class 1B, member 1	0.0122769	0.591964	0.446161
GO:0006464	protein modification process	AK238982.1	Sus scrofa mRNA, clone:THY010053D09, expressed in thymus		DQ896646.2	65018	PINK1	PTEN induced putative kinase 1	0.0122769	0.591964	0.446161
GO:0006464	protein modification process	CK462437	933235 MARC 4PIG Sus scrofa cDNA 3', mRNA sequence						0.0122769	0.591964	0.446161
GO:0006464	protein modification process	DR120938	COG3c1 Pig pBluescript and pTrueBlue library Sus scrofa cDNA 5', mRNA sequence						0.0122769	0.591964	0.446161
GO:0006464	protein modification process	CV876956	PDUts1158D11 Porcine testis cDNA library I Sus scrofa cDNA clone PDUts1158D11 5' similar to homologue to ref|NM_013233.1| Homo sapiens serine threonine kinase 39 (STE20/SPS1 homolog, yeast) (STK39), mRNA, mRNA sequence						0.0122769	0.591964	0.446161
GO:0006464	protein modification process	DB788903	DB788903 full-length enriched swine cDNA library, adult adrenal gland Sus scrofa cDNA clone ADR010083F11 5', mRNA sequence						0.0122769	0.591964	0.446161
GO:0006464	protein modification process	EW290234	rjej38b_p21.y1 jej Sus scrofa cDNA 5', mRNA sequence						0.0122769	0.591964	0.446161
GO:0042775	mitochondrial ATP synthesis coupled electron transport	AK236182.1	Sus scrofa mRNA, clone:OVRM10161E01, expressed in ovary		NM_005006.5	4719	NDUFS1	NADH dehydrogenase (ubiquinone) Fe-S protein 1, 75kDa (NADH-coenzyme Q reductase)	0.0172095	0.670363	12.855
GO:0006119	oxidative phosphorylation	AK236182.1	Sus scrofa mRNA, clone:OVRM10161E01, expressed in ovary		NM_005006.5	4719	NDUFS1	NADH dehydrogenase (ubiquinone) Fe-S protein 1, 75kDa (NADH-coenzyme Q reductase)	0.0172095	0.670363	12.855
GO:0042773	ATP synthesis coupled electron transport	AK236182.1	Sus scrofa mRNA, clone:OVRM10161E01, expressed in ovary		NM_005006.5	4719	NDUFS1	NADH dehydrogenase (ubiquinone) Fe-S protein 1, 75kDa (NADH-coenzyme Q reductase)	0.0172095	0.670363	12.855
GO:0042775	mitochondrial ATP synthesis coupled electron transport	AK236752.1	Sus scrofa mRNA, clone:OVRM10224E06, expressed in ovary		NM_005003.2	4706	NDUFAB1	NADH dehydrogenase (ubiquinone) 1, alpha/beta subcomplex, 1, 8kDa	0.0172095	0.670363	12.855
GO:0006119	oxidative phosphorylation	AK236752.1	Sus scrofa mRNA, clone:OVRM10224E06, expressed in ovary		NM_005003.2	4706	NDUFAB1	NADH dehydrogenase (ubiquinone) 1, alpha/beta subcomplex, 1, 8kDa	0.0172095	0.670363	12.855
GO:0042773	ATP synthesis coupled electron transport	AK236752.1	Sus scrofa mRNA, clone:OVRM10224E06, expressed in ovary		NM_005003.2	4706	NDUFAB1	NADH dehydrogenase (ubiquinone) 1, alpha/beta subcomplex, 1, 8kDa	0.0172095	0.670363	12.855
GO:0050679	positive regulation of epithelial cell proliferation	AF329358.1	Sus scrofa laminin beta-1 chain mRNA, partial cds	LAMB1	NM_002291.2	3912	LAMB1	laminin, beta 1	0.0198297	0.700892	6.42751
GO:0050679	positive regulation of epithelial cell proliferation	BX923548	BX923548 Sus Scrofa library (scan) Sus scrofa cDNA clone scan0012.k.22 5prim, mRNA sequence						0.0198297	0.700892	6.42751
GO:0050679	positive regulation of epithelial cell proliferation	DT324183	SusFleck_BF_0033_0036_5_pCNS_D01 SusFleck Backfat Sus scrofa cDNA clone 0033_0036_D01 5', mRNA sequence						0.0198297	0.700892	6.42751
GO:0051789	response to protein stimulus	AK234533.1	Sus scrofa mRNA, clone:OVR010076H11, expressed in ovary		AK292829.1	23190	UBXN4	UBX domain protein 4	0.0250426	0.747429	5.93309
GO:0006986	response to unfolded protein	AK234533.1	Sus scrofa mRNA, clone:OVR010076H11, expressed in ovary		AK292829.1	23190	UBXN4	UBX domain protein 4	0.0250426	0.747429	5.93309
GO:0051789	response to protein stimulus	AK232205.1	Sus scrofa mRNA, clone:LNG010103E07, expressed in lung		AK095911.1	27129	HSPB7	heat shock 27kDa protein family, member 7 (cardiovascular)	0.0250426	0.747429	5.93309
GO:0006986	response to unfolded protein	AK232205.1	Sus scrofa mRNA, clone:LNG010103E07, expressed in lung		AK095911.1	27129	HSPB7	heat shock 27kDa protein family, member 7 (cardiovascular)	0.0250426	0.747429	5.93309
GO:0008016	regulation of heart contraction	AK232205.1	Sus scrofa mRNA, clone:LNG010103E07, expressed in lung		AK095911.1	27129	HSPB7	heat shock 27kDa protein family, member 7 (cardiovascular)	0.0250426	0.747429	5.93309
GO:0006986	response to unfolded protein	AY609666.1	Sus scrofa clone Clu_24219.scr.msk.p1.Contig4, mRNA sequence		NM_016041.3	51009	DERL2	Der1-like domain family, member 2	0.0250426	0.747429	5.93309
GO:0051789	response to protein stimulus	AY609666.1	Sus scrofa clone Clu_24219.scr.msk.p1.Contig4, mRNA sequence		NM_016041.3	51009	DERL2	Der1-like domain family, member 2	0.0250426	0.747429	5.93309
GO:0008016	regulation of heart contraction	BX925993	BX925993 Sus Scrofa library (scan) Sus scrofa cDNA clone scan0021.f.19 5prim, mRNA sequence						0.0250426	0.747429	5.93309
GO:0008016	regulation of heart contraction	DB788903	DB788903 full-length enriched swine cDNA library, adult adrenal gland Sus scrofa cDNA clone ADR010083F11 5', mRNA sequence						0.0250426	0.747429	5.93309
GO:0045176	apical protein localization	AK233000.1	Sus scrofa mRNA, clone:LVRM10065H01, expressed in liver		BC028234.1	8775	NAPA	N-ethylmaleimide-sensitive factor attachment protein, alpha	0.0279452	0.767566	10.284
GO:0045176	apical protein localization	BP158662	BP158662 full-length enriched swine cDNA library, adult spleen Sus scrofa cDNA clone SPL010018F11 5', mRNA sequence						0.0279452	0.767566	10.284
GO:0007049	cell cycle	AK237149.1	Sus scrofa mRNA, clone:SPL010004H09, expressed in spleen		AK092008.1	54892	NCAPG2	non-SMC condensin II complex, subunit G2	0.0290859	0.774627	0.405521
GO:0007049	cell cycle	CK449659	893247 MARC 4PIG Sus scrofa cDNA 5', mRNA sequence						0.0290859	0.774627	0.405521
GO:0007049	cell cycle	BX915041	BX915041 Sus Scrofa library (scan) Sus scrofa cDNA clone scan0027.c.13 5prim, mRNA sequence						0.0290859	0.774627	0.405521
GO:0007049	cell cycle	DN132970	996409 MARC 4PIG Sus scrofa cDNA 5', mRNA sequence						0.0290859	0.774627	0.405521
GO:0007049	cell cycle	AJ950507	AJ950507 KN404_1 Sus scrofa cDNA clone C0007741i12 5', mRNA sequence						0.0290859	0.774627	0.405521
GO:0009611	response to wounding	AK236127.1	Sus scrofa mRNA, clone:OVRM10155A01, expressed in ovary		NM_001135654.1	8761	PABPC4	poly(A) binding protein, cytoplasmic 4 (inducible form)	0.0305848	0.783278	0.165871
GO:0008284	positive regulation of cell proliferation	AF329358.1	Sus scrofa laminin beta-1 chain mRNA, partial cds	LAMB1	NM_002291.2	3912	LAMB1	laminin, beta 1	0.0318423	0.79004	2.3139
GO:0008284	positive regulation of cell proliferation	AY609666.1	Sus scrofa clone Clu_24219.scr.msk.p1.Contig4, mRNA sequence		NM_016041.3	51009	DERL2	Der1-like domain family, member 2	0.0318423	0.79004	2.3139
GO:0008284	positive regulation of cell proliferation	AY610394.1	Sus scrofa clone reru31c_i7.y1.abd, mRNA sequence		NM_002495.2	4724	NDUFS4	NADH dehydrogenase (ubiquinone) Fe-S protein 4, 18kDa (NADH-coenzyme Q reductase)	0.0318423	0.79004	2.3139
GO:0008284	positive regulation of cell proliferation	BX915041	BX915041 Sus Scrofa library (scan) Sus scrofa cDNA clone scan0027.c.13 5prim, mRNA sequence						0.0318423	0.79004	2.3139
GO:0008284	positive regulation of cell proliferation	BX918412	BX918412 Sus Scrofa library (scan) Sus scrofa cDNA clone scan0038.i.09 5prim, mRNA sequence						0.0318423	0.79004	2.3139
GO:0008284	positive regulation of cell proliferation	BX923548	BX923548 Sus Scrofa library (scan) Sus scrofa cDNA clone scan0012.k.22 5prim, mRNA sequence						0.0318423	0.79004	2.3139
GO:0008284	positive regulation of cell proliferation	CN164178	994302 MARC 4PIG Sus scrofa cDNA 5', mRNA sequence						0.0318423	0.79004	2.3139
GO:0008284	positive regulation of cell proliferation	DT324183	SusFleck_BF_0033_0036_5_pCNS_D01 SusFleck Backfat Sus scrofa cDNA clone 0033_0036_D01 5', mRNA sequence						0.0318423	0.79004	2.3139
GO:0008284	positive regulation of cell proliferation	EW222667	rgul0130_k18.y1 gul Sus scrofa cDNA 5', mRNA sequence						0.0318423	0.79004	2.3139
GO:0048519	negative regulation of biological process	AK235171.1	Sus scrofa mRNA, clone:OVRM10055D04, expressed in ovary		AF087894.1	23564	DDAH2	dimethylarginine dimethylaminohydrolase 2	0.0322954	0.792374	0.542822
GO:0048519	negative regulation of biological process	AK235751.1	Sus scrofa mRNA, clone:OVRM10111E07, expressed in ovary		NM_004323.4	573	BAG1	BCL2-associated athanogene	0.0322954	0.792374	0.542822
GO:0048519	negative regulation of biological process	AK239756.1	Sus scrofa mRNA, clone:THY010202F01, expressed in thymus		BC004465.1	54386	TERF2IP	telomeric repeat binding factor 2, interacting protein	0.0322954	0.792374	0.542822
GO:0048519	negative regulation of biological process	CK467405	938702 MARC 4PIG Sus scrofa cDNA 5', mRNA sequence						0.0322954	0.792374	0.542822
GO:0048519	negative regulation of biological process	CK467896	939242 MARC 4PIG Sus scrofa cDNA 5', mRNA sequence						0.0322954	0.792374	0.542822
GO:0048519	negative regulation of biological process	DN120593	1120622 MARC 4PIG Sus scrofa cDNA 5', mRNA sequence						0.0322954	0.792374	0.542822
GO:0048519	negative regulation of biological process	DN123606	1123919 MARC 4PIG Sus scrofa cDNA 5', mRNA sequence						0.0322954	0.792374	0.542822
GO:0048519	negative regulation of biological process	DV904076	POSM0605028_M02R porcine skeletal muscle cDNA library (PoSM) Sus scrofa cDNA 3', mRNA sequence						0.0322954	0.792374	0.542822
GO:0048519	negative regulation of biological process	EW421594	rnca11b_e13.y1 nca Sus scrofa cDNA 5', mRNA sequence						0.0322954	0.792374	0.542822
GO:0048519	negative regulation of biological process	BE014011	125574 MARC 1PIG Sus scrofa cDNA 5', mRNA sequence						0.0322954	0.792374	0.542822
GO:0048519	negative regulation of biological process	BE235135	142484 MARC 1PIG Sus scrofa cDNA 5', mRNA sequence						0.0322954	0.792374	0.542822
GO:0006895	Golgi to endosome transport	BX666658	BX666658 Sus Scrofa library (scac) Sus scrofa cDNA clone scac0025.d.07 3prim, mRNA sequence						0.0408441	0.828372	8.57002
GO:0006895	Golgi to endosome transport	CK454638	915131 MARC 4PIG Sus scrofa cDNA 5', mRNA sequence						0.0408441	0.828372	8.57002
GO:0015980	energy derivation by oxidation of organic compounds	AK236182.1	Sus scrofa mRNA, clone:OVRM10161E01, expressed in ovary		NM_005006.5	4719	NDUFS1	NADH dehydrogenase (ubiquinone) Fe-S protein 1, 75kDa (NADH-coenzyme Q reductase)	0.049826	0.854819	3.54621
GO:0015980	energy derivation by oxidation of organic compounds	AY610394.1	Sus scrofa clone reru31c_i7.y1.abd, mRNA sequence		NM_002495.2	4724	NDUFS4	NADH dehydrogenase (ubiquinone) Fe-S protein 4, 18kDa (NADH-coenzyme Q reductase)	0.049826	0.854819	3.54621
GO:0015980	energy derivation by oxidation of organic compounds	CK453061	908745 MARC 4PIG Sus scrofa cDNA 5', mRNA sequence						0.049826	0.854819	3.54621
GO:0015980	energy derivation by oxidation of organic compounds	EV869069	rpbfe0138_n6.y1 bfe Sus scrofa cDNA 5', mRNA sequence						0.049826	0.854819	3.54621
GO:0048523	negative regulation of cellular process	AK235171.1	Sus scrofa mRNA, clone:OVRM10055D04, expressed in ovary		AF087894.1	23564	DDAH2	dimethylarginine dimethylaminohydrolase 2	0.0532391	0.86285	0.570182
GO:0048523	negative regulation of cellular process	AK235751.1	Sus scrofa mRNA, clone:OVRM10111E07, expressed in ovary		NM_004323.4	573	BAG1	BCL2-associated athanogene	0.0532391	0.86285	0.570182
GO:0048523	negative regulation of cellular process	AK239756.1	Sus scrofa mRNA, clone:THY010202F01, expressed in thymus		BC004465.1	54386	TERF2IP	telomeric repeat binding factor 2, interacting protein	0.0532391	0.86285	0.570182
GO:0048523	negative regulation of cellular process	CK467405	938702 MARC 4PIG Sus scrofa cDNA 5', mRNA sequence						0.0532391	0.86285	0.570182
GO:0048523	negative regulation of cellular process	CK467896	939242 MARC 4PIG Sus scrofa cDNA 5', mRNA sequence						0.0532391	0.86285	0.570182
GO:0048523	negative regulation of cellular process	DN120593	1120622 MARC 4PIG Sus scrofa cDNA 5', mRNA sequence						0.0532391	0.86285	0.570182
GO:0048523	negative regulation of cellular process	DN123606	1123919 MARC 4PIG Sus scrofa cDNA 5', mRNA sequence						0.0532391	0.86285	0.570182
GO:0048523	negative regulation of cellular process	DV904076	POSM0605028_M02R porcine skeletal muscle cDNA library (PoSM) Sus scrofa cDNA 3', mRNA sequence						0.0532391	0.86285	0.570182
GO:0048523	negative regulation of cellular process	EW421594	rnca11b_e13.y1 nca Sus scrofa cDNA 5', mRNA sequence						0.0532391	0.86285	0.570182
GO:0048523	negative regulation of cellular process	BE014011	125574 MARC 1PIG Sus scrofa cDNA 5', mRNA sequence						0.0532391	0.86285	0.570182
GO:0048523	negative regulation of cellular process	BE235135	142484 MARC 1PIG Sus scrofa cDNA 5', mRNA sequence						0.0532391	0.86285	0.570182
GO:0044267	cellular protein metabolic process	AK230890.1	Sus scrofa mRNA, clone:AMP010059F12, expressed in alveolar macrophage		NM_003968.3	9039	UBA3	ubiquitin-like modifier activating enzyme 3	0.0532501	0.862874	0.684081
GO:0044267	cellular protein metabolic process	AK235390.1	Sus scrofa mRNA, clone:OVRM10075G05, expressed in ovary		AK291935.1	118424	UBE2J2	ubiquitin-conjugating enzyme E2, J2 (UBC6 homolog, yeast)	0.0532501	0.862874	0.684081
GO:0044267	cellular protein metabolic process	AK238836.1	Sus scrofa mRNA, clone:THY010035H09, expressed in thymus		NM_031992.1	7458	EIF4H	eukaryotic translation initiation factor 4H	0.0532501	0.862874	0.684081
GO:0044267	cellular protein metabolic process	AK236028.1	Sus scrofa mRNA, clone:OVRM10140A03, expressed in ovary		AY358465.1	11253	MAN1B1	mannosidase, alpha, class 1B, member 1	0.0532501	0.862874	0.684081
GO:0044267	cellular protein metabolic process	AK236127.1	Sus scrofa mRNA, clone:OVRM10155A01, expressed in ovary		NM_001135654.1	8761	PABPC4	poly(A) binding protein, cytoplasmic 4 (inducible form)	0.0532501	0.862874	0.684081
GO:0044267	cellular protein metabolic process	AK238982.1	Sus scrofa mRNA, clone:THY010053D09, expressed in thymus		DQ896646.2	65018	PINK1	PTEN induced putative kinase 1	0.0532501	0.862874	0.684081
GO:0044267	cellular protein metabolic process	AY609666.1	Sus scrofa clone Clu_24219.scr.msk.p1.Contig4, mRNA sequence		NM_016041.3	51009	DERL2	Der1-like domain family, member 2	0.0532501	0.862874	0.684081
GO:0044267	cellular protein metabolic process	AY609717.1	Sus scrofa clone Clu_2746.scr.msk.p1.Contig4, mRNA sequence		NM_006430.2	10575	CCT4	chaperonin containing TCP1, subunit 4 (delta)	0.0532501	0.862874	0.684081
GO:0044267	cellular protein metabolic process	BX664880	BX664880 Sus Scrofa library (scag) Sus scrofa cDNA clone scag0005.d.07 5prim, mRNA sequence						0.0532501	0.862874	0.684081
GO:0044267	cellular protein metabolic process	BX665103	BX665103 Sus Scrofa library (scag) Sus scrofa cDNA clone scag0004.c.03 5prim, mRNA sequence						0.0532501	0.862874	0.684081
GO:0044267	cellular protein metabolic process	CK462437	933235 MARC 4PIG Sus scrofa cDNA 3', mRNA sequence						0.0532501	0.862874	0.684081
GO:0044267	cellular protein metabolic process	BX915041	BX915041 Sus Scrofa library (scan) Sus scrofa cDNA clone scan0027.c.13 5prim, mRNA sequence						0.0532501	0.862874	0.684081
GO:0044267	cellular protein metabolic process	CJ012192	CJ012192 full-length enriched swine cDNA library, adult mesenteric lymph node Sus scrofa cDNA clone MLN01B080058 5', mRNA sequence						0.0532501	0.862874	0.684081
GO:0044267	cellular protein metabolic process	DN102168	1097048 MARC 4PIG Sus scrofa cDNA 5', mRNA sequence						0.0532501	0.862874	0.684081
GO:0044267	cellular protein metabolic process	DN123551	1123855 MARC 4PIG Sus scrofa cDNA 5', mRNA sequence						0.0532501	0.862874	0.684081
GO:0044267	cellular protein metabolic process	AJ944603	AJ944603 CSEQRAN17 Sus scrofa cDNA clone C0007304f23 5', mRNA sequence						0.0532501	0.862874	0.684081
GO:0044267	cellular protein metabolic process	DR120938	COG3c1 Pig pBluescript and pTrueBlue library Sus scrofa cDNA 5', mRNA sequence						0.0532501	0.862874	0.684081
GO:0044267	cellular protein metabolic process	CV876956	PDUts1158D11 Porcine testis cDNA library I Sus scrofa cDNA clone PDUts1158D11 5' similar to homologue to ref|NM_013233.1| Homo sapiens serine threonine kinase 39 (STE20/SPS1 homolog, yeast) (STK39), mRNA, mRNA sequence						0.0532501	0.862874	0.684081
GO:0044267	cellular protein metabolic process	DY406584	1498188 MARC 3PIG Sus scrofa cDNA 5', mRNA sequence						0.0532501	0.862874	0.684081
GO:0044267	cellular protein metabolic process	DB788903	DB788903 full-length enriched swine cDNA library, adult adrenal gland Sus scrofa cDNA clone ADR010083F11 5', mRNA sequence						0.0532501	0.862874	0.684081
GO:0044267	cellular protein metabolic process	EV890051	rcad06b_b19.y1 cag Sus scrofa cDNA 5', mRNA sequence						0.0532501	0.862874	0.684081
GO:0044267	cellular protein metabolic process	EV928670	rche13_i19.y1 che Sus scrofa cDNA 5', mRNA sequence						0.0532501	0.862874	0.684081
GO:0044267	cellular protein metabolic process	EW290234	rjej38b_p21.y1 jej Sus scrofa cDNA 5', mRNA sequence						0.0532501	0.862874	0.684081
GO:0044267	cellular protein metabolic process	EW359956	rlyg33_i2.y1 lyg Sus scrofa cDNA 5', mRNA sequence						0.0532501	0.862874	0.684081
GO:0007243	protein kinase cascade	AK238982.1	Sus scrofa mRNA, clone:THY010053D09, expressed in thymus		DQ896646.2	65018	PINK1	PTEN induced putative kinase 1	0.0545581	0.86572	0.186305
GO:0044238	primary metabolic process	AK230638.1	Sus scrofa mRNA, clone:AMP010019E02, expressed in alveolar macrophage	LOC100157274	NM_012399.3	23760	PITPNB	phosphatidylinositol transfer protein, beta	0.0588213	0.874228	0.79741
GO:0044238	primary metabolic process	AK240417.1	Sus scrofa mRNA, clone:UTR010066E08, expressed in uterus		AB073609.1	55256	ADI1	acireductone dioxygenase 1	0.0588213	0.874228	0.79741
GO:0044238	primary metabolic process	AK230890.1	Sus scrofa mRNA, clone:AMP010059F12, expressed in alveolar macrophage		NM_003968.3	9039	UBA3	ubiquitin-like modifier activating enzyme 3	0.0588213	0.874228	0.79741
GO:0044238	primary metabolic process	AK234461.1	Sus scrofa mRNA, clone:OVR010067A09, expressed in ovary		NM_006107.3	51747	LUC7L3	LUC7-like 3 (S. cerevisiae)	0.0588213	0.874228	0.79741
GO:0044238	primary metabolic process	AK237695.1	Sus scrofa mRNA, clone:SPL010081H01, expressed in spleen		BC053635.1	8602	NOP14	NOP14 nucleolar protein homolog (yeast)	0.0588213	0.874228	0.79741
GO:0044238	primary metabolic process	AK234932.1	Sus scrofa mRNA, clone:OVRM10033G12, expressed in ovary		AK311348.1	2189	FANCG	Fanconi anemia, complementation group G	0.0588213	0.874228	0.79741
GO:0044238	primary metabolic process	AK235171.1	Sus scrofa mRNA, clone:OVRM10055D04, expressed in ovary		AF087894.1	23564	DDAH2	dimethylarginine dimethylaminohydrolase 2	0.0588213	0.874228	0.79741
GO:0044238	primary metabolic process	AK231556.1	Sus scrofa mRNA, clone:ITT010093E05, expressed in intestine		NM_004506.3	3298	HSF2	heat shock transcription factor 2	0.0588213	0.874228	0.79741
GO:0044238	primary metabolic process	AK231755.1	Sus scrofa mRNA, clone:LNG010019G08, expressed in lung		BC008723.2	440	ASNS	asparagine synthetase	0.0588213	0.874228	0.79741
GO:0044238	primary metabolic process	AK235390.1	Sus scrofa mRNA, clone:OVRM10075G05, expressed in ovary		AK291935.1	118424	UBE2J2	ubiquitin-conjugating enzyme E2, J2 (UBC6 homolog, yeast)	0.0588213	0.874228	0.79741
GO:0044238	primary metabolic process	AK238836.1	Sus scrofa mRNA, clone:THY010035H09, expressed in thymus		NM_031992.1	7458	EIF4H	eukaryotic translation initiation factor 4H	0.0588213	0.874228	0.79741
GO:0044238	primary metabolic process	AK232555.1	Sus scrofa mRNA, clone:LVR010073A12, expressed in liver		NM_004208.2	9131	AIFM1	apoptosis-inducing factor, mitochondrion-associated, 1	0.0588213	0.874228	0.79741
GO:0044238	primary metabolic process	AK236028.1	Sus scrofa mRNA, clone:OVRM10140A03, expressed in ovary		AY358465.1	11253	MAN1B1	mannosidase, alpha, class 1B, member 1	0.0588213	0.874228	0.79741
GO:0044238	primary metabolic process	AK236127.1	Sus scrofa mRNA, clone:OVRM10155A01, expressed in ovary		NM_001135654.1	8761	PABPC4	poly(A) binding protein, cytoplasmic 4 (inducible form)	0.0588213	0.874228	0.79741
GO:0044238	primary metabolic process	AK238982.1	Sus scrofa mRNA, clone:THY010053D09, expressed in thymus		DQ896646.2	65018	PINK1	PTEN induced putative kinase 1	0.0588213	0.874228	0.79741
GO:0044238	primary metabolic process	AK236182.1	Sus scrofa mRNA, clone:OVRM10161E01, expressed in ovary		NM_005006.5	4719	NDUFS1	NADH dehydrogenase (ubiquinone) Fe-S protein 1, 75kDa (NADH-coenzyme Q reductase)	0.0588213	0.874228	0.79741
GO:0044238	primary metabolic process	AK236324.1	Sus scrofa mRNA, clone:OVRM10181E04, expressed in ovary		BC000439.2	5162	PDHB	pyruvate dehydrogenase (lipoamide) beta	0.0588213	0.874228	0.79741
GO:0044238	primary metabolic process	AK230569.1	Sus scrofa mRNA, clone:AMP010010H06, expressed in alveolar macrophage	----	NM_001358.2	1665	DHX15	DEAH (Asp-Glu-Ala-His) box polypeptide 15	0.0588213	0.874228	0.79741
GO:0044238	primary metabolic process	AK236398.1	Sus scrofa mRNA, clone:OVRM10188F03, expressed in ovary		AM746459.1	440400	RNASEK	ribonuclease, RNase K	0.0588213	0.874228	0.79741
GO:0044238	primary metabolic process	AK236404.1	Sus scrofa mRNA, clone:OVRM10189A09, expressed in ovary		AK297127.1	11100	HNRNPUL1	heterogeneous nuclear ribonucleoprotein U-like 1	0.0588213	0.874228	0.79741
GO:0044238	primary metabolic process	AK236416.1	Sus scrofa mRNA, clone:OVRM10189H07, expressed in ovary		NM_001071.2	7298	TYMS	thymidylate synthetase	0.0588213	0.874228	0.79741
GO:0044238	primary metabolic process	AK239600.1	Sus scrofa mRNA, clone:THY010115C09, expressed in thymus		AK291127.1	1632	DCI	dodecenoyl-Coenzyme A delta isomerase (3,2 trans-enoyl-Coenzyme A isomerase)	0.0588213	0.874228	0.79741
GO:0044238	primary metabolic process	AK239611.1	Sus scrofa mRNA, clone:THY010116E05, expressed in thymus		NR_003249.1	9987	HNRPDL	heterogeneous nuclear ribonucleoprotein D-like	0.0588213	0.874228	0.79741
GO:0044238	primary metabolic process	AK239646.1	Sus scrofa mRNA, clone:THY010118H06, expressed in thymus		BC066963.1	3032	HADHB	hydroxyacyl-Coenzyme A dehydrogenase/3-ketoacyl-Coenzyme A thiolase/enoyl-Coenzyme A hydratase (trifunctional protein), beta subunit	0.0588213	0.874228	0.79741
GO:0044238	primary metabolic process	AK236752.1	Sus scrofa mRNA, clone:OVRM10224E06, expressed in ovary		NM_005003.2	4706	NDUFAB1	NADH dehydrogenase (ubiquinone) 1, alpha/beta subcomplex, 1, 8kDa	0.0588213	0.874228	0.79741
GO:0044238	primary metabolic process	AK239756.1	Sus scrofa mRNA, clone:THY010202F01, expressed in thymus		BC004465.1	54386	TERF2IP	telomeric repeat binding factor 2, interacting protein	0.0588213	0.874228	0.79741
GO:0044238	primary metabolic process	AK233382.1	Sus scrofa mRNA, clone:LVRM10136B04, expressed in liver		CR594689.1	7884	SLBP	stem-loop binding protein	0.0588213	0.874228	0.79741
GO:0044238	primary metabolic process	AK233966.1	Sus scrofa mRNA, clone:MLN010082C02, expressed in mesenteric lymph node		BC107696.1	56915	EXOSC5	exosome component 5	0.0588213	0.874228	0.79741
GO:0044238	primary metabolic process	AY609666.1	Sus scrofa clone Clu_24219.scr.msk.p1.Contig4, mRNA sequence		NM_016041.3	51009	DERL2	Der1-like domain family, member 2	0.0588213	0.874228	0.79741
GO:0044238	primary metabolic process	AY609717.1	Sus scrofa clone Clu_2746.scr.msk.p1.Contig4, mRNA sequence		NM_006430.2	10575	CCT4	chaperonin containing TCP1, subunit 4 (delta)	0.0588213	0.874228	0.79741
GO:0044238	primary metabolic process	AY609798.1	Sus scrofa clone Clu_3164.scr.msk.p1.Contig1, mRNA sequence		AK290334.1	51319	RSRC1	arginine/serine-rich coiled-coil 1	0.0588213	0.874228	0.79741
GO:0044238	primary metabolic process	AY610031.1	Sus scrofa clone Clu_58583.scr.msk.p1.Contig3, mRNA sequence		NM_003616.2	8487	SIP1	survival of motor neuron protein interacting protein 1	0.0588213	0.874228	0.79741
GO:0044238	primary metabolic process	AY610411.1	Sus scrofa clone risp02_p18.y1.abd, mRNA sequence	TPRKB	NM_016058.2	51002	TPRKB	TP53RK binding protein	0.0588213	0.874228	0.79741
GO:0044238	primary metabolic process	AY705447.1	Sus scrofa sterol response element binding protein cleavage-activating protein mRNA, partial cds	SCAP	AK300311.1	22937	SCAP	SREBF chaperone	0.0588213	0.874228	0.79741
GO:0044238	primary metabolic process	CF793647	889067 MARC 4PIG Sus scrofa cDNA 5', mRNA sequence						0.0588213	0.874228	0.79741
GO:0044238	primary metabolic process	BX664880	BX664880 Sus Scrofa library (scag) Sus scrofa cDNA clone scag0005.d.07 5prim, mRNA sequence						0.0588213	0.874228	0.79741
GO:0044238	primary metabolic process	BX665103	BX665103 Sus Scrofa library (scag) Sus scrofa cDNA clone scag0004.c.03 5prim, mRNA sequence						0.0588213	0.874228	0.79741
GO:0044238	primary metabolic process	BX667682	BX667682 Sus Scrofa library (scac) Sus scrofa cDNA clone scac0026.g.10 5prim, mRNA sequence						0.0588213	0.874228	0.79741
GO:0044238	primary metabolic process	CK453061	908745 MARC 4PIG Sus scrofa cDNA 5', mRNA sequence						0.0588213	0.874228	0.79741
GO:0044238	primary metabolic process	CK462437	933235 MARC 4PIG Sus scrofa cDNA 3', mRNA sequence						0.0588213	0.874228	0.79741
GO:0044238	primary metabolic process	BX914521	BX914521 Sus Scrofa library (scan) Sus scrofa cDNA clone scan0001.d.06 5prim, mRNA sequence						0.0588213	0.874228	0.79741
GO:0044238	primary metabolic process	BX915041	BX915041 Sus Scrofa library (scan) Sus scrofa cDNA clone scan0027.c.13 5prim, mRNA sequence						0.0588213	0.874228	0.79741
GO:0044238	primary metabolic process	BX918412	BX918412 Sus Scrofa library (scan) Sus scrofa cDNA clone scan0038.i.09 5prim, mRNA sequence						0.0588213	0.874228	0.79741
GO:0044238	primary metabolic process	CN164178	994302 MARC 4PIG Sus scrofa cDNA 5', mRNA sequence						0.0588213	0.874228	0.79741
GO:0044238	primary metabolic process	CJ011361	CJ011361 full-length enriched swine cDNA library, adult mesenteric lymph node Sus scrofa cDNA clone MLN01D120048 5', mRNA sequence						0.0588213	0.874228	0.79741
GO:0044238	primary metabolic process	CJ012192	CJ012192 full-length enriched swine cDNA library, adult mesenteric lymph node Sus scrofa cDNA clone MLN01B080058 5', mRNA sequence						0.0588213	0.874228	0.79741
GO:0044238	primary metabolic process	DN102168	1097048 MARC 4PIG Sus scrofa cDNA 5', mRNA sequence						0.0588213	0.874228	0.79741
GO:0044238	primary metabolic process	DN123551	1123855 MARC 4PIG Sus scrofa cDNA 5', mRNA sequence						0.0588213	0.874228	0.79741
GO:0044238	primary metabolic process	AJ950507	AJ950507 KN404_1 Sus scrofa cDNA clone C0007741i12 5', mRNA sequence						0.0588213	0.874228	0.79741
GO:0044238	primary metabolic process	AJ944603	AJ944603 CSEQRAN17 Sus scrofa cDNA clone C0007304f23 5', mRNA sequence						0.0588213	0.874228	0.79741
GO:0044238	primary metabolic process	DR120938	COG3c1 Pig pBluescript and pTrueBlue library Sus scrofa cDNA 5', mRNA sequence						0.0588213	0.874228	0.79741
GO:0044238	primary metabolic process	CV876956	PDUts1158D11 Porcine testis cDNA library I Sus scrofa cDNA clone PDUts1158D11 5' similar to homologue to ref|NM_013233.1| Homo sapiens serine threonine kinase 39 (STE20/SPS1 homolog, yeast) (STK39), mRNA, mRNA sequence						0.0588213	0.874228	0.79741
GO:0044238	primary metabolic process	DY406584	1498188 MARC 3PIG Sus scrofa cDNA 5', mRNA sequence						0.0588213	0.874228	0.79741
GO:0044238	primary metabolic process	DB788903	DB788903 full-length enriched swine cDNA library, adult adrenal gland Sus scrofa cDNA clone ADR010083F11 5', mRNA sequence						0.0588213	0.874228	0.79741
GO:0044238	primary metabolic process	EV869069	rpbfe0138_n6.y1 bfe Sus scrofa cDNA 5', mRNA sequence						0.0588213	0.874228	0.79741
GO:0044238	primary metabolic process	EV890051	rcad06b_b19.y1 cag Sus scrofa cDNA 5', mRNA sequence						0.0588213	0.874228	0.79741
GO:0044238	primary metabolic process	EV928670	rche13_i19.y1 che Sus scrofa cDNA 5', mRNA sequence						0.0588213	0.874228	0.79741
GO:0044238	primary metabolic process	EW290234	rjej38b_p21.y1 jej Sus scrofa cDNA 5', mRNA sequence						0.0588213	0.874228	0.79741
GO:0044238	primary metabolic process	EW359956	rlyg33_i2.y1 lyg Sus scrofa cDNA 5', mRNA sequence						0.0588213	0.874228	0.79741
GO:0044238	primary metabolic process	EW429561	rnca04b_d14.y1 nca Sus scrofa cDNA 5', mRNA sequence						0.0588213	0.874228	0.79741
GO:0044238	primary metabolic process	BE235135	142484 MARC 1PIG Sus scrofa cDNA 5', mRNA sequence						0.0588213	0.874228	0.79741
GO:0044238	primary metabolic process	CA779561	MPL384_12_P03 MPL Sus scrofa cDNA clone pSPORT1 5', mRNA sequence						0.0588213	0.874228	0.79741
GO:0009893	positive regulation of metabolic process	CN164178	994302 MARC 4PIG Sus scrofa cDNA 5', mRNA sequence						0.060382	0.87708	0.358745
GO:0009893	positive regulation of metabolic process	DN121268	1121355 MARC 4PIG Sus scrofa cDNA 3', mRNA sequence						0.060382	0.87708	0.358745
GO:0009893	positive regulation of metabolic process	EW464984	rnmm24c_m17.y1 nmm Sus scrofa cDNA 5', mRNA sequence						0.060382	0.87708	0.358745
GO:0050678	regulation of epithelial cell proliferation	AF329358.1	Sus scrofa laminin beta-1 chain mRNA, partial cds	LAMB1	NM_002291.2	3912	LAMB1	laminin, beta 1	0.0618756	0.87969	4.28501
GO:0050678	regulation of epithelial cell proliferation	BX923548	BX923548 Sus Scrofa library (scan) Sus scrofa cDNA clone scan0012.k.22 5prim, mRNA sequence						0.0618756	0.87969	4.28501
GO:0050678	regulation of epithelial cell proliferation	DT324183	SusFleck_BF_0033_0036_5_pCNS_D01 SusFleck Backfat Sus scrofa cDNA clone 0033_0036_D01 5', mRNA sequence						0.0618756	0.87969	4.28501
GO:0031325	positive regulation of cellular metabolic process	CN164178	994302 MARC 4PIG Sus scrofa cDNA 5', mRNA sequence						0.0655903	0.885725	0.363821
GO:0031325	positive regulation of cellular metabolic process	DN121268	1121355 MARC 4PIG Sus scrofa cDNA 3', mRNA sequence						0.0655903	0.885725	0.363821
GO:0031325	positive regulation of cellular metabolic process	EW464984	rnmm24c_m17.y1 nmm Sus scrofa cDNA 5', mRNA sequence						0.0655903	0.885725	0.363821
GO:0006468	protein amino acid phosphorylation	AK238982.1	Sus scrofa mRNA, clone:THY010053D09, expressed in thymus		DQ896646.2	65018	PINK1	PTEN induced putative kinase 1	0.0692919	0.891165	0.367286
GO:0006468	protein amino acid phosphorylation	CV876956	PDUts1158D11 Porcine testis cDNA library I Sus scrofa cDNA clone PDUts1158D11 5' similar to homologue to ref|NM_013233.1| Homo sapiens serine threonine kinase 39 (STE20/SPS1 homolog, yeast) (STK39), mRNA, mRNA sequence						0.0692919	0.891165	0.367286
GO:0006468	protein amino acid phosphorylation	DB788903	DB788903 full-length enriched swine cDNA library, adult adrenal gland Sus scrofa cDNA clone ADR010083F11 5', mRNA sequence						0.0692919	0.891165	0.367286
GO:0019538	protein metabolic process	AK230890.1	Sus scrofa mRNA, clone:AMP010059F12, expressed in alveolar macrophage		NM_003968.3	9039	UBA3	ubiquitin-like modifier activating enzyme 3	0.0703803	0.892668	0.703999
GO:0019538	protein metabolic process	AK235390.1	Sus scrofa mRNA, clone:OVRM10075G05, expressed in ovary		AK291935.1	118424	UBE2J2	ubiquitin-conjugating enzyme E2, J2 (UBC6 homolog, yeast)	0.0703803	0.892668	0.703999
GO:0019538	protein metabolic process	AK238836.1	Sus scrofa mRNA, clone:THY010035H09, expressed in thymus		NM_031992.1	7458	EIF4H	eukaryotic translation initiation factor 4H	0.0703803	0.892668	0.703999
GO:0019538	protein metabolic process	AK236028.1	Sus scrofa mRNA, clone:OVRM10140A03, expressed in ovary		AY358465.1	11253	MAN1B1	mannosidase, alpha, class 1B, member 1	0.0703803	0.892668	0.703999
GO:0019538	protein metabolic process	AK236127.1	Sus scrofa mRNA, clone:OVRM10155A01, expressed in ovary		NM_001135654.1	8761	PABPC4	poly(A) binding protein, cytoplasmic 4 (inducible form)	0.0703803	0.892668	0.703999
GO:0019538	protein metabolic process	AK238982.1	Sus scrofa mRNA, clone:THY010053D09, expressed in thymus		DQ896646.2	65018	PINK1	PTEN induced putative kinase 1	0.0703803	0.892668	0.703999
GO:0019538	protein metabolic process	AY609666.1	Sus scrofa clone Clu_24219.scr.msk.p1.Contig4, mRNA sequence		NM_016041.3	51009	DERL2	Der1-like domain family, member 2	0.0703803	0.892668	0.703999
GO:0019538	protein metabolic process	AY609717.1	Sus scrofa clone Clu_2746.scr.msk.p1.Contig4, mRNA sequence		NM_006430.2	10575	CCT4	chaperonin containing TCP1, subunit 4 (delta)	0.0703803	0.892668	0.703999
GO:0019538	protein metabolic process	AY610411.1	Sus scrofa clone risp02_p18.y1.abd, mRNA sequence	TPRKB	NM_016058.2	51002	TPRKB	TP53RK binding protein	0.0703803	0.892668	0.703999
GO:0019538	protein metabolic process	BX664880	BX664880 Sus Scrofa library (scag) Sus scrofa cDNA clone scag0005.d.07 5prim, mRNA sequence						0.0703803	0.892668	0.703999
GO:0019538	protein metabolic process	BX665103	BX665103 Sus Scrofa library (scag) Sus scrofa cDNA clone scag0004.c.03 5prim, mRNA sequence						0.0703803	0.892668	0.703999
GO:0019538	protein metabolic process	CK462437	933235 MARC 4PIG Sus scrofa cDNA 3', mRNA sequence						0.0703803	0.892668	0.703999
GO:0019538	protein metabolic process	BX915041	BX915041 Sus Scrofa library (scan) Sus scrofa cDNA clone scan0027.c.13 5prim, mRNA sequence						0.0703803	0.892668	0.703999
GO:0019538	protein metabolic process	CJ012192	CJ012192 full-length enriched swine cDNA library, adult mesenteric lymph node Sus scrofa cDNA clone MLN01B080058 5', mRNA sequence						0.0703803	0.892668	0.703999
GO:0019538	protein metabolic process	DN102168	1097048 MARC 4PIG Sus scrofa cDNA 5', mRNA sequence						0.0703803	0.892668	0.703999
GO:0019538	protein metabolic process	DN123551	1123855 MARC 4PIG Sus scrofa cDNA 5', mRNA sequence						0.0703803	0.892668	0.703999
GO:0019538	protein metabolic process	AJ944603	AJ944603 CSEQRAN17 Sus scrofa cDNA clone C0007304f23 5', mRNA sequence						0.0703803	0.892668	0.703999
GO:0019538	protein metabolic process	DR120938	COG3c1 Pig pBluescript and pTrueBlue library Sus scrofa cDNA 5', mRNA sequence						0.0703803	0.892668	0.703999
GO:0019538	protein metabolic process	CV876956	PDUts1158D11 Porcine testis cDNA library I Sus scrofa cDNA clone PDUts1158D11 5' similar to homologue to ref|NM_013233.1| Homo sapiens serine threonine kinase 39 (STE20/SPS1 homolog, yeast) (STK39), mRNA, mRNA sequence						0.0703803	0.892668	0.703999
GO:0019538	protein metabolic process	DY406584	1498188 MARC 3PIG Sus scrofa cDNA 5', mRNA sequence						0.0703803	0.892668	0.703999
GO:0019538	protein metabolic process	DB788903	DB788903 full-length enriched swine cDNA library, adult adrenal gland Sus scrofa cDNA clone ADR010083F11 5', mRNA sequence						0.0703803	0.892668	0.703999
GO:0019538	protein metabolic process	EV890051	rcad06b_b19.y1 cag Sus scrofa cDNA 5', mRNA sequence						0.0703803	0.892668	0.703999
GO:0019538	protein metabolic process	EV928670	rche13_i19.y1 che Sus scrofa cDNA 5', mRNA sequence						0.0703803	0.892668	0.703999
GO:0019538	protein metabolic process	EW290234	rjej38b_p21.y1 jej Sus scrofa cDNA 5', mRNA sequence						0.0703803	0.892668	0.703999
GO:0019538	protein metabolic process	EW359956	rlyg33_i2.y1 lyg Sus scrofa cDNA 5', mRNA sequence						0.0703803	0.892668	0.703999
GO:0022904	respiratory electron transport chain	AK236182.1	Sus scrofa mRNA, clone:OVRM10161E01, expressed in ovary		NM_005006.5	4719	NDUFS1	NADH dehydrogenase (ubiquinone) Fe-S protein 1, 75kDa (NADH-coenzyme Q reductase)	0.0724054	0.895355	6.42751
GO:0022904	respiratory electron transport chain	AK236752.1	Sus scrofa mRNA, clone:OVRM10224E06, expressed in ovary		NM_005003.2	4706	NDUFAB1	NADH dehydrogenase (ubiquinone) 1, alpha/beta subcomplex, 1, 8kDa	0.0724054	0.895355	6.42751
GO:0042476	odontogenesis	AF329358.1	Sus scrofa laminin beta-1 chain mRNA, partial cds	LAMB1	NM_002291.2	3912	LAMB1	laminin, beta 1	0.0724054	0.895355	6.42751
GO:0042476	odontogenesis	BX923548	BX923548 Sus Scrofa library (scan) Sus scrofa cDNA clone scan0012.k.22 5prim, mRNA sequence						0.0724054	0.895355	6.42751
GO:0051726	regulation of cell cycle	AK234932.1	Sus scrofa mRNA, clone:OVRM10033G12, expressed in ovary		AK311348.1	2189	FANCG	Fanconi anemia, complementation group G	0.073786	0.897112	0.199303
GO:0000278	mitotic cell cycle	AK237149.1	Sus scrofa mRNA, clone:SPL010004H09, expressed in spleen		AK092008.1	54892	NCAPG2	non-SMC condensin II complex, subunit G2	0.0751924	0.898842	0.304261
GO:0000278	mitotic cell cycle	BX915041	BX915041 Sus Scrofa library (scan) Sus scrofa cDNA clone scan0027.c.13 5prim, mRNA sequence						0.0751924	0.898842	0.304261
GO:0008610	lipid biosynthetic process	AK236752.1	Sus scrofa mRNA, clone:OVRM10224E06, expressed in ovary		NM_005003.2	4706	NDUFAB1	NADH dehydrogenase (ubiquinone) 1, alpha/beta subcomplex, 1, 8kDa	0.0762868	0.900148	0.20086
GO:0010604	positive regulation of macromolecule metabolic process	CN164178	994302 MARC 4PIG Sus scrofa cDNA 5', mRNA sequence						0.0772844	0.90131	0.374418
GO:0010604	positive regulation of macromolecule metabolic process	DN121268	1121355 MARC 4PIG Sus scrofa cDNA 3', mRNA sequence						0.0772844	0.90131	0.374418
GO:0010604	positive regulation of macromolecule metabolic process	EW464984	rnmm24c_m17.y1 nmm Sus scrofa cDNA 5', mRNA sequence						0.0772844	0.90131	0.374418
GO:0030490	maturation of SSU-rRNA	AK237695.1	Sus scrofa mRNA, clone:SPL010081H01, expressed in spleen		BC053635.1	8602	NOP14	NOP14 nucleolar protein homolog (yeast)	0.0777906	0.901889	25.71
GO:0042274	ribosomal small subunit biogenesis	AK237695.1	Sus scrofa mRNA, clone:SPL010081H01, expressed in spleen		BC053635.1	8602	NOP14	NOP14 nucleolar protein homolog (yeast)	0.0777906	0.901889	25.71
GO:0009065	glutamine family amino acid catabolic process	AK235171.1	Sus scrofa mRNA, clone:OVRM10055D04, expressed in ovary		AF087894.1	23564	DDAH2	dimethylarginine dimethylaminohydrolase 2	0.0777906	0.901889	25.71
GO:0006527	arginine catabolic process	AK235171.1	Sus scrofa mRNA, clone:OVRM10055D04, expressed in ovary		AF087894.1	23564	DDAH2	dimethylarginine dimethylaminohydrolase 2	0.0777906	0.901889	25.71
GO:0009157	deoxyribonucleoside monophosphate biosynthetic process	AK236416.1	Sus scrofa mRNA, clone:OVRM10189H07, expressed in ovary		NM_001071.2	7298	TYMS	thymidylate synthetase	0.0777906	0.901889	25.71
GO:0009162	deoxyribonucleoside monophosphate metabolic process	AK236416.1	Sus scrofa mRNA, clone:OVRM10189H07, expressed in ovary		NM_001071.2	7298	TYMS	thymidylate synthetase	0.0777906	0.901889	25.71
GO:0030970	retrograde protein transport, ER to cytosol	AY609666.1	Sus scrofa clone Clu_24219.scr.msk.p1.Contig4, mRNA sequence		NM_016041.3	51009	DERL2	Der1-like domain family, member 2	0.0777906	0.901889	25.71
GO:0043900	regulation of multi-organism process	CK454638	915131 MARC 4PIG Sus scrofa cDNA 5', mRNA sequence						0.0777906	0.901889	25.71
GO:0002831	regulation of response to biotic stimulus	CK454638	915131 MARC 4PIG Sus scrofa cDNA 5', mRNA sequence						0.0777906	0.901889	25.71
GO:0050690	regulation of defense response to virus by virus	CK454638	915131 MARC 4PIG Sus scrofa cDNA 5', mRNA sequence						0.0777906	0.901889	25.71
GO:0050688	regulation of defense response to virus	CK454638	915131 MARC 4PIG Sus scrofa cDNA 5', mRNA sequence						0.0777906	0.901889	25.71
GO:0045404	positive regulation of interleukin-4 biosynthetic process	CN164178	994302 MARC 4PIG Sus scrofa cDNA 5', mRNA sequence						0.0777906	0.901889	25.71
GO:0045402	regulation of interleukin-4 biosynthetic process	CN164178	994302 MARC 4PIG Sus scrofa cDNA 5', mRNA sequence						0.0777906	0.901889	25.71
GO:0032673	regulation of interleukin-4 production	CN164178	994302 MARC 4PIG Sus scrofa cDNA 5', mRNA sequence						0.0777906	0.901889	25.71
GO:0019511	peptidyl-proline hydroxylation	EW290234	rjej38b_p21.y1 jej Sus scrofa cDNA 5', mRNA sequence						0.0777906	0.901889	25.71
GO:0018208	peptidyl-proline modification	EW290234	rjej38b_p21.y1 jej Sus scrofa cDNA 5', mRNA sequence						0.0777906	0.901889	25.71
GO:0019471	4-hydroxyproline metabolic process	EW290234	rjej38b_p21.y1 jej Sus scrofa cDNA 5', mRNA sequence						0.0777906	0.901889	25.71
GO:0018401	peptidyl-proline hydroxylation to 4-hydroxy-L-proline	EW290234	rjej38b_p21.y1 jej Sus scrofa cDNA 5', mRNA sequence						0.0777906	0.901889	25.71
GO:0022402	cell cycle process	AK237149.1	Sus scrofa mRNA, clone:SPL010004H09, expressed in spleen		AK092008.1	54892	NCAPG2	non-SMC condensin II complex, subunit G2	0.0779796	0.902103	0.424959
GO:0022402	cell cycle process	BX915041	BX915041 Sus Scrofa library (scan) Sus scrofa cDNA clone scan0027.c.13 5prim, mRNA sequence						0.0779796	0.902103	0.424959
GO:0022402	cell cycle process	DN132970	996409 MARC 4PIG Sus scrofa cDNA 5', mRNA sequence						0.0779796	0.902103	0.424959
GO:0022402	cell cycle process	AJ950507	AJ950507 KN404_1 Sus scrofa cDNA clone C0007741i12 5', mRNA sequence						0.0779796	0.902103	0.424959
GO:0030262	apoptotic nuclear changes	AK232555.1	Sus scrofa mRNA, clone:LVR010073A12, expressed in liver		NM_004208.2	9131	AIFM1	apoptosis-inducing factor, mitochondrion-associated, 1	0.0907322	0.914689	5.71334
GO:0008105	asymmetric protein localization	AK233000.1	Sus scrofa mRNA, clone:LVRM10065H01, expressed in liver		BC028234.1	8775	NAPA	N-ethylmaleimide-sensitive factor attachment protein, alpha	0.0907322	0.914689	5.71334
GO:0008105	asymmetric protein localization	BP158662	BP158662 full-length enriched swine cDNA library, adult spleen Sus scrofa cDNA clone SPL010018F11 5', mRNA sequence						0.0907322	0.914689	5.71334
GO:0001570	vasculogenesis	DN120593	1120622 MARC 4PIG Sus scrofa cDNA 5', mRNA sequence						0.0907322	0.914689	5.71334
GO:0001570	vasculogenesis	EW088403	recc2833c_i12.y1 ecc Sus scrofa cDNA 5', mRNA sequence						0.0907322	0.914689	5.71334
GO:0046328	regulation of JNK cascade	EW177532	rfcc24b_f2.y1 fcc Sus scrofa cDNA 5', mRNA sequence						0.0907322	0.914689	5.71334
GO:0030262	apoptotic nuclear changes	EW421594	rnca11b_e13.y1 nca Sus scrofa cDNA 5', mRNA sequence						0.0907322	0.914689	5.71334
GO:0046328	regulation of JNK cascade	BE014011	125574 MARC 1PIG Sus scrofa cDNA 5', mRNA sequence						0.0907322	0.914689	5.71334
GO:0006357	regulation of transcription from RNA polymerase II promoter	AK238657.1	Sus scrofa mRNA, clone:THY010014G12, expressed in thymus		NM_004514.3	3607	FOXK2	forkhead box K2	0.0908858	0.914821	0.385651
GO:0006357	regulation of transcription from RNA polymerase II promoter	AY609778.1	Sus scrofa clone Clu_30724.scr.msk.p1.Contig4, mRNA sequence		CR616160.1	11267	SNF8	SNF8, ESCRT-II complex subunit, homolog (S. cerevisiae)	0.0908858	0.914821	0.385651
GO:0006357	regulation of transcription from RNA polymerase II promoter	CK467896	939242 MARC 4PIG Sus scrofa cDNA 5', mRNA sequence						0.0908858	0.914821	0.385651
GO:0051641	cellular localization	AK233000.1	Sus scrofa mRNA, clone:LVRM10065H01, expressed in liver		BC028234.1	8775	NAPA	N-ethylmaleimide-sensitive factor attachment protein, alpha	0.103166	0.924192	0.563508
GO:0051641	cellular localization	AY609666.1	Sus scrofa clone Clu_24219.scr.msk.p1.Contig4, mRNA sequence		NM_016041.3	51009	DERL2	Der1-like domain family, member 2	0.103166	0.924192	0.563508
GO:0051641	cellular localization	BX666658	BX666658 Sus Scrofa library (scac) Sus scrofa cDNA clone scac0025.d.07 3prim, mRNA sequence						0.103166	0.924192	0.563508
GO:0051641	cellular localization	CK454638	915131 MARC 4PIG Sus scrofa cDNA 5', mRNA sequence						0.103166	0.924192	0.563508
GO:0051641	cellular localization	CK454645	915140 MARC 4PIG Sus scrofa cDNA 5', mRNA sequence						0.103166	0.924192	0.563508
GO:0051641	cellular localization	DR120938	COG3c1 Pig pBluescript and pTrueBlue library Sus scrofa cDNA 5', mRNA sequence						0.103166	0.924192	0.563508
GO:0051641	cellular localization	EV984595	rcmu37_l22.y1 cmu Sus scrofa cDNA 5', mRNA sequence						0.103166	0.924192	0.563508
GO:0051641	cellular localization	EW137538	reru09c_h4.y1 eru Sus scrofa cDNA 5', mRNA sequence						0.103166	0.924192	0.563508
GO:0050877	neurological system process	BX665103	BX665103 Sus Scrofa library (scag) Sus scrofa cDNA clone scag0004.c.03 5prim, mRNA sequence						0.109734	0.928404	0.219744
GO:0000279	M phase	AK237149.1	Sus scrofa mRNA, clone:SPL010004H09, expressed in spleen		AK092008.1	54892	NCAPG2	non-SMC condensin II complex, subunit G2	0.113358	0.930534	0.331743
GO:0000279	M phase	AJ950507	AJ950507 KN404_1 Sus scrofa cDNA clone C0007741i12 5', mRNA sequence						0.113358	0.930534	0.331743
GO:0010646	regulation of cell communication	DB788903	DB788903 full-length enriched swine cDNA library, adult adrenal gland Sus scrofa cDNA clone ADR010083F11 5', mRNA sequence						0.118533	0.933365	0.405948
GO:0010646	regulation of cell communication	EW177532	rfcc24b_f2.y1 fcc Sus scrofa cDNA 5', mRNA sequence						0.118533	0.933365	0.405948
GO:0010646	regulation of cell communication	BE014011	125574 MARC 1PIG Sus scrofa cDNA 5', mRNA sequence						0.118533	0.933365	0.405948
GO:0006997	nucleus organization	AK232555.1	Sus scrofa mRNA, clone:LVR010073A12, expressed in liver		NM_004208.2	9131	AIFM1	apoptosis-inducing factor, mitochondrion-associated, 1	0.129414	0.938624	3.21376
GO:0006997	nucleus organization	EV867707	rpbfe0123_n8.y1 bfe Sus scrofa cDNA 5', mRNA sequence						0.129414	0.938624	3.21376
GO:0006997	nucleus organization	EW421594	rnca11b_e13.y1 nca Sus scrofa cDNA 5', mRNA sequence						0.129414	0.938624	3.21376
GO:0006811	ion transport	AK232136.1	Sus scrofa mRNA, clone:LNG010086D03, expressed in lung		AK057903.1	1318	SLC31A2	solute carrier family 31 (copper transporters), member 2	0.130892	0.939274	0.342801
GO:0006811	ion transport	EW367525	rmas918b_h23.y1 mas Sus scrofa cDNA 5', mRNA sequence						0.130892	0.939274	0.342801
GO:0009605	response to external stimulus	AK235604.1	Sus scrofa mRNA, clone:OVRM10097B08, expressed in ovary		NM_001048251.1	123920	CMTM3	CKLF-like MARVEL transmembrane domain containing 3	0.131071	0.939352	0.46534
GO:0009605	response to external stimulus	AK236127.1	Sus scrofa mRNA, clone:OVRM10155A01, expressed in ovary		NM_001135654.1	8761	PABPC4	poly(A) binding protein, cytoplasmic 4 (inducible form)	0.131071	0.939352	0.46534
GO:0009605	response to external stimulus	AK240181.1	Sus scrofa mRNA, clone:UTR010038F11, expressed in uterus		NM_032514.2	84557	MAP1LC3A	microtubule-associated protein 1 light chain 3 alpha	0.131071	0.939352	0.46534
GO:0009605	response to external stimulus	BP158662	BP158662 full-length enriched swine cDNA library, adult spleen Sus scrofa cDNA clone SPL010018F11 5', mRNA sequence						0.131071	0.939352	0.46534
GO:0009064	glutamine family amino acid metabolic process	AK235171.1	Sus scrofa mRNA, clone:OVRM10055D04, expressed in ovary		AF087894.1	23564	DDAH2	dimethylarginine dimethylaminohydrolase 2	0.131714	0.93963	4.67455
GO:0009064	glutamine family amino acid metabolic process	AK231755.1	Sus scrofa mRNA, clone:LNG010019G08, expressed in lung		BC008723.2	440	ASNS	asparagine synthetase	0.131714	0.93963	4.67455
GO:0000087	M phase of mitotic cell cycle	AK237149.1	Sus scrofa mRNA, clone:SPL010004H09, expressed in spleen		AK092008.1	54892	NCAPG2	non-SMC condensin II complex, subunit G2	0.133459	0.940373	0.231622
GO:0016568	chromatin modification	CK452762	908422 MARC 4PIG Sus scrofa cDNA 5', mRNA sequence						0.137858	0.942165	0.233728
GO:0022403	cell cycle phase	AK237149.1	Sus scrofa mRNA, clone:SPL010004H09, expressed in spleen		AK092008.1	54892	NCAPG2	non-SMC condensin II complex, subunit G2	0.145949	0.945196	0.423792
GO:0022403	cell cycle phase	BX915041	BX915041 Sus Scrofa library (scan) Sus scrofa cDNA clone scan0027.c.13 5prim, mRNA sequence						0.145949	0.945196	0.423792
GO:0022403	cell cycle phase	AJ950507	AJ950507 KN404_1 Sus scrofa cDNA clone C0007741i12 5', mRNA sequence						0.145949	0.945196	0.423792
GO:0007399	nervous system development	AK233000.1	Sus scrofa mRNA, clone:LVRM10065H01, expressed in liver		BC028234.1	8775	NAPA	N-ethylmaleimide-sensitive factor attachment protein, alpha	0.149646	0.946477	0.516266
GO:0007399	nervous system development	AF329358.1	Sus scrofa laminin beta-1 chain mRNA, partial cds	LAMB1	NM_002291.2	3912	LAMB1	laminin, beta 1	0.149646	0.946477	0.516266
GO:0007399	nervous system development	AY610394.1	Sus scrofa clone reru31c_i7.y1.abd, mRNA sequence		NM_002495.2	4724	NDUFS4	NADH dehydrogenase (ubiquinone) Fe-S protein 4, 18kDa (NADH-coenzyme Q reductase)	0.149646	0.946477	0.516266
GO:0007399	nervous system development	BX923548	BX923548 Sus Scrofa library (scan) Sus scrofa cDNA clone scan0012.k.22 5prim, mRNA sequence						0.149646	0.946477	0.516266
GO:0007399	nervous system development	DN100858	1000249 MARC 4PIG Sus scrofa cDNA 5', mRNA sequence						0.149646	0.946477	0.516266
GO:0051704	multi-organism process	AK236404.1	Sus scrofa mRNA, clone:OVRM10189A09, expressed in ovary		AK297127.1	11100	HNRNPUL1	heterogeneous nuclear ribonucleoprotein U-like 1	0.150897	0.946898	0.354621
GO:0051704	multi-organism process	BX665103	BX665103 Sus Scrofa library (scag) Sus scrofa cDNA clone scag0004.c.03 5prim, mRNA sequence						0.150897	0.946898	0.354621
GO:0045935	positive regulation of nucleobase, nucleoside, nucleotide and nucleic acid metabolic process	DN121268	1121355 MARC 4PIG Sus scrofa cDNA 3', mRNA sequence						0.150897	0.946898	0.354621
GO:0045935	positive regulation of nucleobase, nucleoside, nucleotide and nucleic acid metabolic process	EW464984	rnmm24c_m17.y1 nmm Sus scrofa cDNA 5', mRNA sequence						0.150897	0.946898	0.354621
GO:0044260	cellular macromolecule metabolic process	AK230890.1	Sus scrofa mRNA, clone:AMP010059F12, expressed in alveolar macrophage		NM_003968.3	9039	UBA3	ubiquitin-like modifier activating enzyme 3	0.151136	0.946977	0.816732
GO:0044260	cellular macromolecule metabolic process	AK234461.1	Sus scrofa mRNA, clone:OVR010067A09, expressed in ovary		NM_006107.3	51747	LUC7L3	LUC7-like 3 (S. cerevisiae)	0.151136	0.946977	0.816732
GO:0044260	cellular macromolecule metabolic process	AK237695.1	Sus scrofa mRNA, clone:SPL010081H01, expressed in spleen		BC053635.1	8602	NOP14	NOP14 nucleolar protein homolog (yeast)	0.151136	0.946977	0.816732
GO:0044260	cellular macromolecule metabolic process	AK234932.1	Sus scrofa mRNA, clone:OVRM10033G12, expressed in ovary		AK311348.1	2189	FANCG	Fanconi anemia, complementation group G	0.151136	0.946977	0.816732
GO:0044260	cellular macromolecule metabolic process	AK231556.1	Sus scrofa mRNA, clone:ITT010093E05, expressed in intestine		NM_004506.3	3298	HSF2	heat shock transcription factor 2	0.151136	0.946977	0.816732
GO:0044260	cellular macromolecule metabolic process	AK235390.1	Sus scrofa mRNA, clone:OVRM10075G05, expressed in ovary		AK291935.1	118424	UBE2J2	ubiquitin-conjugating enzyme E2, J2 (UBC6 homolog, yeast)	0.151136	0.946977	0.816732
GO:0044260	cellular macromolecule metabolic process	AK238836.1	Sus scrofa mRNA, clone:THY010035H09, expressed in thymus		NM_031992.1	7458	EIF4H	eukaryotic translation initiation factor 4H	0.151136	0.946977	0.816732
GO:0044260	cellular macromolecule metabolic process	AK232555.1	Sus scrofa mRNA, clone:LVR010073A12, expressed in liver		NM_004208.2	9131	AIFM1	apoptosis-inducing factor, mitochondrion-associated, 1	0.151136	0.946977	0.816732
GO:0044260	cellular macromolecule metabolic process	AK236028.1	Sus scrofa mRNA, clone:OVRM10140A03, expressed in ovary		AY358465.1	11253	MAN1B1	mannosidase, alpha, class 1B, member 1	0.151136	0.946977	0.816732
GO:0044260	cellular macromolecule metabolic process	AK236127.1	Sus scrofa mRNA, clone:OVRM10155A01, expressed in ovary		NM_001135654.1	8761	PABPC4	poly(A) binding protein, cytoplasmic 4 (inducible form)	0.151136	0.946977	0.816732
GO:0044260	cellular macromolecule metabolic process	AK238982.1	Sus scrofa mRNA, clone:THY010053D09, expressed in thymus		DQ896646.2	65018	PINK1	PTEN induced putative kinase 1	0.151136	0.946977	0.816732
GO:0044260	cellular macromolecule metabolic process	AK236324.1	Sus scrofa mRNA, clone:OVRM10181E04, expressed in ovary		BC000439.2	5162	PDHB	pyruvate dehydrogenase (lipoamide) beta	0.151136	0.946977	0.816732
GO:0044260	cellular macromolecule metabolic process	AK230569.1	Sus scrofa mRNA, clone:AMP010010H06, expressed in alveolar macrophage	----	NM_001358.2	1665	DHX15	DEAH (Asp-Glu-Ala-His) box polypeptide 15	0.151136	0.946977	0.816732
GO:0044260	cellular macromolecule metabolic process	AK236398.1	Sus scrofa mRNA, clone:OVRM10188F03, expressed in ovary		AM746459.1	440400	RNASEK	ribonuclease, RNase K	0.151136	0.946977	0.816732
GO:0044260	cellular macromolecule metabolic process	AK236404.1	Sus scrofa mRNA, clone:OVRM10189A09, expressed in ovary		AK297127.1	11100	HNRNPUL1	heterogeneous nuclear ribonucleoprotein U-like 1	0.151136	0.946977	0.816732
GO:0044260	cellular macromolecule metabolic process	AK236416.1	Sus scrofa mRNA, clone:OVRM10189H07, expressed in ovary		NM_001071.2	7298	TYMS	thymidylate synthetase	0.151136	0.946977	0.816732
GO:0044260	cellular macromolecule metabolic process	AK239611.1	Sus scrofa mRNA, clone:THY010116E05, expressed in thymus		NR_003249.1	9987	HNRPDL	heterogeneous nuclear ribonucleoprotein D-like	0.151136	0.946977	0.816732
GO:0044260	cellular macromolecule metabolic process	AK239756.1	Sus scrofa mRNA, clone:THY010202F01, expressed in thymus		BC004465.1	54386	TERF2IP	telomeric repeat binding factor 2, interacting protein	0.151136	0.946977	0.816732
GO:0044260	cellular macromolecule metabolic process	AK233382.1	Sus scrofa mRNA, clone:LVRM10136B04, expressed in liver		CR594689.1	7884	SLBP	stem-loop binding protein	0.151136	0.946977	0.816732
GO:0044260	cellular macromolecule metabolic process	AK233966.1	Sus scrofa mRNA, clone:MLN010082C02, expressed in mesenteric lymph node		BC107696.1	56915	EXOSC5	exosome component 5	0.151136	0.946977	0.816732
GO:0044260	cellular macromolecule metabolic process	AY609666.1	Sus scrofa clone Clu_24219.scr.msk.p1.Contig4, mRNA sequence		NM_016041.3	51009	DERL2	Der1-like domain family, member 2	0.151136	0.946977	0.816732
GO:0044260	cellular macromolecule metabolic process	AY609717.1	Sus scrofa clone Clu_2746.scr.msk.p1.Contig4, mRNA sequence		NM_006430.2	10575	CCT4	chaperonin containing TCP1, subunit 4 (delta)	0.151136	0.946977	0.816732
GO:0044260	cellular macromolecule metabolic process	AY609798.1	Sus scrofa clone Clu_3164.scr.msk.p1.Contig1, mRNA sequence		AK290334.1	51319	RSRC1	arginine/serine-rich coiled-coil 1	0.151136	0.946977	0.816732
GO:0044260	cellular macromolecule metabolic process	AY610031.1	Sus scrofa clone Clu_58583.scr.msk.p1.Contig3, mRNA sequence		NM_003616.2	8487	SIP1	survival of motor neuron protein interacting protein 1	0.151136	0.946977	0.816732
GO:0044260	cellular macromolecule metabolic process	BX664880	BX664880 Sus Scrofa library (scag) Sus scrofa cDNA clone scag0005.d.07 5prim, mRNA sequence						0.151136	0.946977	0.816732
GO:0044260	cellular macromolecule metabolic process	BX665103	BX665103 Sus Scrofa library (scag) Sus scrofa cDNA clone scag0004.c.03 5prim, mRNA sequence						0.151136	0.946977	0.816732
GO:0044260	cellular macromolecule metabolic process	BX667682	BX667682 Sus Scrofa library (scac) Sus scrofa cDNA clone scac0026.g.10 5prim, mRNA sequence						0.151136	0.946977	0.816732
GO:0044260	cellular macromolecule metabolic process	CK453061	908745 MARC 4PIG Sus scrofa cDNA 5', mRNA sequence						0.151136	0.946977	0.816732
GO:0044260	cellular macromolecule metabolic process	CK462437	933235 MARC 4PIG Sus scrofa cDNA 3', mRNA sequence						0.151136	0.946977	0.816732
GO:0044260	cellular macromolecule metabolic process	BX914521	BX914521 Sus Scrofa library (scan) Sus scrofa cDNA clone scan0001.d.06 5prim, mRNA sequence						0.151136	0.946977	0.816732
GO:0044260	cellular macromolecule metabolic process	BX915041	BX915041 Sus Scrofa library (scan) Sus scrofa cDNA clone scan0027.c.13 5prim, mRNA sequence						0.151136	0.946977	0.816732
GO:0044260	cellular macromolecule metabolic process	BX918412	BX918412 Sus Scrofa library (scan) Sus scrofa cDNA clone scan0038.i.09 5prim, mRNA sequence						0.151136	0.946977	0.816732
GO:0044260	cellular macromolecule metabolic process	CN164178	994302 MARC 4PIG Sus scrofa cDNA 5', mRNA sequence						0.151136	0.946977	0.816732
GO:0044260	cellular macromolecule metabolic process	CJ011361	CJ011361 full-length enriched swine cDNA library, adult mesenteric lymph node Sus scrofa cDNA clone MLN01D120048 5', mRNA sequence						0.151136	0.946977	0.816732
GO:0044260	cellular macromolecule metabolic process	CJ012192	CJ012192 full-length enriched swine cDNA library, adult mesenteric lymph node Sus scrofa cDNA clone MLN01B080058 5', mRNA sequence						0.151136	0.946977	0.816732
GO:0044260	cellular macromolecule metabolic process	DN102168	1097048 MARC 4PIG Sus scrofa cDNA 5', mRNA sequence						0.151136	0.946977	0.816732
GO:0044260	cellular macromolecule metabolic process	DN123551	1123855 MARC 4PIG Sus scrofa cDNA 5', mRNA sequence						0.151136	0.946977	0.816732
GO:0044260	cellular macromolecule metabolic process	AJ950507	AJ950507 KN404_1 Sus scrofa cDNA clone C0007741i12 5', mRNA sequence						0.151136	0.946977	0.816732
GO:0044260	cellular macromolecule metabolic process	AJ944603	AJ944603 CSEQRAN17 Sus scrofa cDNA clone C0007304f23 5', mRNA sequence						0.151136	0.946977	0.816732
GO:0044260	cellular macromolecule metabolic process	DR120938	COG3c1 Pig pBluescript and pTrueBlue library Sus scrofa cDNA 5', mRNA sequence						0.151136	0.946977	0.816732
GO:0044260	cellular macromolecule metabolic process	CV876956	PDUts1158D11 Porcine testis cDNA library I Sus scrofa cDNA clone PDUts1158D11 5' similar to homologue to ref|NM_013233.1| Homo sapiens serine threonine kinase 39 (STE20/SPS1 homolog, yeast) (STK39), mRNA, mRNA sequence						0.151136	0.946977	0.816732
GO:0044260	cellular macromolecule metabolic process	DY406584	1498188 MARC 3PIG Sus scrofa cDNA 5', mRNA sequence						0.151136	0.946977	0.816732
GO:0044260	cellular macromolecule metabolic process	DB788903	DB788903 full-length enriched swine cDNA library, adult adrenal gland Sus scrofa cDNA clone ADR010083F11 5', mRNA sequence						0.151136	0.946977	0.816732
GO:0044260	cellular macromolecule metabolic process	EV869069	rpbfe0138_n6.y1 bfe Sus scrofa cDNA 5', mRNA sequence						0.151136	0.946977	0.816732
GO:0044260	cellular macromolecule metabolic process	EV890051	rcad06b_b19.y1 cag Sus scrofa cDNA 5', mRNA sequence						0.151136	0.946977	0.816732
GO:0044260	cellular macromolecule metabolic process	EV928670	rche13_i19.y1 che Sus scrofa cDNA 5', mRNA sequence						0.151136	0.946977	0.816732
GO:0044260	cellular macromolecule metabolic process	EW290234	rjej38b_p21.y1 jej Sus scrofa cDNA 5', mRNA sequence						0.151136	0.946977	0.816732
GO:0044260	cellular macromolecule metabolic process	EW359956	rlyg33_i2.y1 lyg Sus scrofa cDNA 5', mRNA sequence						0.151136	0.946977	0.816732
GO:0009058	biosynthetic process	AK235171.1	Sus scrofa mRNA, clone:OVRM10055D04, expressed in ovary		AF087894.1	23564	DDAH2	dimethylarginine dimethylaminohydrolase 2	0.151231	0.947008	0.696042
GO:0009058	biosynthetic process	AK231556.1	Sus scrofa mRNA, clone:ITT010093E05, expressed in intestine		NM_004506.3	3298	HSF2	heat shock transcription factor 2	0.151231	0.947008	0.696042
GO:0009058	biosynthetic process	AK238836.1	Sus scrofa mRNA, clone:THY010035H09, expressed in thymus		NM_031992.1	7458	EIF4H	eukaryotic translation initiation factor 4H	0.151231	0.947008	0.696042
GO:0009058	biosynthetic process	AK236028.1	Sus scrofa mRNA, clone:OVRM10140A03, expressed in ovary		AY358465.1	11253	MAN1B1	mannosidase, alpha, class 1B, member 1	0.151231	0.947008	0.696042
GO:0009058	biosynthetic process	AK236127.1	Sus scrofa mRNA, clone:OVRM10155A01, expressed in ovary		NM_001135654.1	8761	PABPC4	poly(A) binding protein, cytoplasmic 4 (inducible form)	0.151231	0.947008	0.696042
GO:0009058	biosynthetic process	AK236398.1	Sus scrofa mRNA, clone:OVRM10188F03, expressed in ovary		AM746459.1	440400	RNASEK	ribonuclease, RNase K	0.151231	0.947008	0.696042
GO:0009058	biosynthetic process	AK236416.1	Sus scrofa mRNA, clone:OVRM10189H07, expressed in ovary		NM_001071.2	7298	TYMS	thymidylate synthetase	0.151231	0.947008	0.696042
GO:0009058	biosynthetic process	AK236752.1	Sus scrofa mRNA, clone:OVRM10224E06, expressed in ovary		NM_005003.2	4706	NDUFAB1	NADH dehydrogenase (ubiquinone) 1, alpha/beta subcomplex, 1, 8kDa	0.151231	0.947008	0.696042
GO:0009058	biosynthetic process	AK239756.1	Sus scrofa mRNA, clone:THY010202F01, expressed in thymus		BC004465.1	54386	TERF2IP	telomeric repeat binding factor 2, interacting protein	0.151231	0.947008	0.696042
GO:0009058	biosynthetic process	AY705447.1	Sus scrofa sterol response element binding protein cleavage-activating protein mRNA, partial cds	SCAP	AK300311.1	22937	SCAP	SREBF chaperone	0.151231	0.947008	0.696042
GO:0009058	biosynthetic process	CF793647	889067 MARC 4PIG Sus scrofa cDNA 5', mRNA sequence						0.151231	0.947008	0.696042
GO:0009058	biosynthetic process	BX914521	BX914521 Sus Scrofa library (scan) Sus scrofa cDNA clone scan0001.d.06 5prim, mRNA sequence						0.151231	0.947008	0.696042
GO:0009058	biosynthetic process	BX918412	BX918412 Sus Scrofa library (scan) Sus scrofa cDNA clone scan0038.i.09 5prim, mRNA sequence						0.151231	0.947008	0.696042
GO:0009058	biosynthetic process	DN123551	1123855 MARC 4PIG Sus scrofa cDNA 5', mRNA sequence						0.151231	0.947008	0.696042
GO:0009058	biosynthetic process	DR120938	COG3c1 Pig pBluescript and pTrueBlue library Sus scrofa cDNA 5', mRNA sequence						0.151231	0.947008	0.696042
GO:0009058	biosynthetic process	EV928670	rche13_i19.y1 che Sus scrofa cDNA 5', mRNA sequence						0.151231	0.947008	0.696042
GO:0043102	amino acid salvage	AK240417.1	Sus scrofa mRNA, clone:UTR010066E08, expressed in uterus		AB073609.1	55256	ADI1	acireductone dioxygenase 1	0.152559	0.947446	12.855
GO:0051881	regulation of mitochondrial membrane potential	AK236182.1	Sus scrofa mRNA, clone:OVRM10161E01, expressed in ovary		NM_005006.5	4719	NDUFS1	NADH dehydrogenase (ubiquinone) Fe-S protein 1, 75kDa (NADH-coenzyme Q reductase)	0.152559	0.947446	12.855
GO:0009263	deoxyribonucleotide biosynthetic process	AK236416.1	Sus scrofa mRNA, clone:OVRM10189H07, expressed in ovary		NM_001071.2	7298	TYMS	thymidylate synthetase	0.152559	0.947446	12.855
GO:0006635	fatty acid beta-oxidation	AK239600.1	Sus scrofa mRNA, clone:THY010115C09, expressed in thymus		AK291127.1	1632	DCI	dodecenoyl-Coenzyme A delta isomerase (3,2 trans-enoyl-Coenzyme A isomerase)	0.152559	0.947446	12.855
GO:0006398	histone mRNA 3'-end processing	AK233382.1	Sus scrofa mRNA, clone:LVRM10136B04, expressed in liver		CR594689.1	7884	SLBP	stem-loop binding protein	0.152559	0.947446	12.855
GO:0008334	histone mRNA metabolic process	AK233382.1	Sus scrofa mRNA, clone:LVRM10136B04, expressed in liver		CR594689.1	7884	SLBP	stem-loop binding protein	0.152559	0.947446	12.855
GO:0032981	mitochondrial respiratory chain complex I assembly	AY610394.1	Sus scrofa clone reru31c_i7.y1.abd, mRNA sequence		NM_002495.2	4724	NDUFS4	NADH dehydrogenase (ubiquinone) Fe-S protein 4, 18kDa (NADH-coenzyme Q reductase)	0.152559	0.947446	12.855
GO:0010257	NADH dehydrogenase complex assembly	AY610394.1	Sus scrofa clone reru31c_i7.y1.abd, mRNA sequence		NM_002495.2	4724	NDUFS4	NADH dehydrogenase (ubiquinone) Fe-S protein 4, 18kDa (NADH-coenzyme Q reductase)	0.152559	0.947446	12.855
GO:0033108	mitochondrial respiratory chain complex assembly	AY610394.1	Sus scrofa clone reru31c_i7.y1.abd, mRNA sequence		NM_002495.2	4724	NDUFS4	NADH dehydrogenase (ubiquinone) Fe-S protein 4, 18kDa (NADH-coenzyme Q reductase)	0.152559	0.947446	12.855
GO:0043482	cellular pigment accumulation	BP158662	BP158662 full-length enriched swine cDNA library, adult spleen Sus scrofa cDNA clone SPL010018F11 5', mRNA sequence						0.152559	0.947446	12.855
GO:0043476	pigment accumulation	BP158662	BP158662 full-length enriched swine cDNA library, adult spleen Sus scrofa cDNA clone SPL010018F11 5', mRNA sequence						0.152559	0.947446	12.855
GO:0008054	cyclin catabolic process	BX915041	BX915041 Sus Scrofa library (scan) Sus scrofa cDNA clone scan0027.c.13 5prim, mRNA sequence						0.152559	0.947446	12.855
GO:0009950	dorsal/ventral axis specification	BX923538	BX923538 Sus Scrofa library (scan) Sus scrofa cDNA clone scan0014.h.08 5prim, mRNA sequence						0.152559	0.947446	12.855
GO:0000768	syncytium formation by plasma membrane fusion	BX925993	BX925993 Sus Scrofa library (scan) Sus scrofa cDNA clone scan0021.f.19 5prim, mRNA sequence						0.152559	0.947446	12.855
GO:0007520	myoblast fusion	BX925993	BX925993 Sus Scrofa library (scan) Sus scrofa cDNA clone scan0021.f.19 5prim, mRNA sequence						0.152559	0.947446	12.855
GO:0042104	positive regulation of activated T cell proliferation	CN164178	994302 MARC 4PIG Sus scrofa cDNA 5', mRNA sequence						0.152559	0.947446	12.855
GO:0046006	regulation of activated T cell proliferation	CN164178	994302 MARC 4PIG Sus scrofa cDNA 5', mRNA sequence						0.152559	0.947446	12.855
GO:0022617	extracellular matrix disassembly	DT324183	SusFleck_BF_0033_0036_5_pCNS_D01 SusFleck Backfat Sus scrofa cDNA clone 0033_0036_D01 5', mRNA sequence						0.152559	0.947446	12.855
GO:0031581	hemidesmosome assembly	DT324183	SusFleck_BF_0033_0036_5_pCNS_D01 SusFleck Backfat Sus scrofa cDNA clone 0033_0036_D01 5', mRNA sequence						0.152559	0.947446	12.855
GO:0005977	glycogen metabolic process	CK453061	908745 MARC 4PIG Sus scrofa cDNA 5', mRNA sequence						0.15409	0.947941	4.28501
GO:0005977	glycogen metabolic process	EV869069	rpbfe0138_n6.y1 bfe Sus scrofa cDNA 5', mRNA sequence						0.15409	0.947941	4.28501
GO:0051649	establishment of localization in cell	AK233000.1	Sus scrofa mRNA, clone:LVRM10065H01, expressed in liver		BC028234.1	8775	NAPA	N-ethylmaleimide-sensitive factor attachment protein, alpha	0.155758	0.948469	0.597908
GO:0051649	establishment of localization in cell	AY609666.1	Sus scrofa clone Clu_24219.scr.msk.p1.Contig4, mRNA sequence		NM_016041.3	51009	DERL2	Der1-like domain family, member 2	0.155758	0.948469	0.597908
GO:0051649	establishment of localization in cell	BX666658	BX666658 Sus Scrofa library (scac) Sus scrofa cDNA clone scac0025.d.07 3prim, mRNA sequence						0.155758	0.948469	0.597908
GO:0051649	establishment of localization in cell	CK454638	915131 MARC 4PIG Sus scrofa cDNA 5', mRNA sequence						0.155758	0.948469	0.597908
GO:0051649	establishment of localization in cell	CK454645	915140 MARC 4PIG Sus scrofa cDNA 5', mRNA sequence						0.155758	0.948469	0.597908
GO:0051649	establishment of localization in cell	DR120938	COG3c1 Pig pBluescript and pTrueBlue library Sus scrofa cDNA 5', mRNA sequence						0.155758	0.948469	0.597908
GO:0051649	establishment of localization in cell	EV984595	rcmu37_l22.y1 cmu Sus scrofa cDNA 5', mRNA sequence						0.155758	0.948469	0.597908
GO:0051649	establishment of localization in cell	EW137538	reru09c_h4.y1 eru Sus scrofa cDNA 5', mRNA sequence						0.155758	0.948469	0.597908
GO:0007067	mitosis	AK237149.1	Sus scrofa mRNA, clone:SPL010004H09, expressed in spleen		AK092008.1	54892	NCAPG2	non-SMC condensin II complex, subunit G2	0.167264	0.951844	0.247212
GO:0009892	negative regulation of metabolic process	AK239756.1	Sus scrofa mRNA, clone:THY010202F01, expressed in thymus		BC004465.1	54386	TERF2IP	telomeric repeat binding factor 2, interacting protein	0.170238	0.952645	0.489715
GO:0009892	negative regulation of metabolic process	CK467405	938702 MARC 4PIG Sus scrofa cDNA 5', mRNA sequence						0.170238	0.952645	0.489715
GO:0009892	negative regulation of metabolic process	CK467896	939242 MARC 4PIG Sus scrofa cDNA 5', mRNA sequence						0.170238	0.952645	0.489715
GO:0009892	negative regulation of metabolic process	EW421594	rnca11b_e13.y1 nca Sus scrofa cDNA 5', mRNA sequence						0.170238	0.952645	0.489715
GO:0009891	positive regulation of biosynthetic process	CN164178	994302 MARC 4PIG Sus scrofa cDNA 5', mRNA sequence						0.174489	0.953745	0.440744
GO:0031328	positive regulation of cellular biosynthetic process	CN164178	994302 MARC 4PIG Sus scrofa cDNA 5', mRNA sequence						0.174489	0.953745	0.440744
GO:0031328	positive regulation of cellular biosynthetic process	DN121268	1121355 MARC 4PIG Sus scrofa cDNA 3', mRNA sequence						0.174489	0.953745	0.440744
GO:0009891	positive regulation of biosynthetic process	DN121268	1121355 MARC 4PIG Sus scrofa cDNA 3', mRNA sequence						0.174489	0.953745	0.440744
GO:0009891	positive regulation of biosynthetic process	EW464984	rnmm24c_m17.y1 nmm Sus scrofa cDNA 5', mRNA sequence						0.174489	0.953745	0.440744
GO:0031328	positive regulation of cellular biosynthetic process	EW464984	rnmm24c_m17.y1 nmm Sus scrofa cDNA 5', mRNA sequence						0.174489	0.953745	0.440744
GO:0044249	cellular biosynthetic process	AK235171.1	Sus scrofa mRNA, clone:OVRM10055D04, expressed in ovary		AF087894.1	23564	DDAH2	dimethylarginine dimethylaminohydrolase 2	0.175372	0.953967	0.708022
GO:0044249	cellular biosynthetic process	AK231556.1	Sus scrofa mRNA, clone:ITT010093E05, expressed in intestine		NM_004506.3	3298	HSF2	heat shock transcription factor 2	0.175372	0.953967	0.708022
GO:0044249	cellular biosynthetic process	AK238836.1	Sus scrofa mRNA, clone:THY010035H09, expressed in thymus		NM_031992.1	7458	EIF4H	eukaryotic translation initiation factor 4H	0.175372	0.953967	0.708022
GO:0044249	cellular biosynthetic process	AK236028.1	Sus scrofa mRNA, clone:OVRM10140A03, expressed in ovary		AY358465.1	11253	MAN1B1	mannosidase, alpha, class 1B, member 1	0.175372	0.953967	0.708022
GO:0044249	cellular biosynthetic process	AK236127.1	Sus scrofa mRNA, clone:OVRM10155A01, expressed in ovary		NM_001135654.1	8761	PABPC4	poly(A) binding protein, cytoplasmic 4 (inducible form)	0.175372	0.953967	0.708022
GO:0044249	cellular biosynthetic process	AK236398.1	Sus scrofa mRNA, clone:OVRM10188F03, expressed in ovary		AM746459.1	440400	RNASEK	ribonuclease, RNase K	0.175372	0.953967	0.708022
GO:0044249	cellular biosynthetic process	AK236416.1	Sus scrofa mRNA, clone:OVRM10189H07, expressed in ovary		NM_001071.2	7298	TYMS	thymidylate synthetase	0.175372	0.953967	0.708022
GO:0044249	cellular biosynthetic process	AK236752.1	Sus scrofa mRNA, clone:OVRM10224E06, expressed in ovary		NM_005003.2	4706	NDUFAB1	NADH dehydrogenase (ubiquinone) 1, alpha/beta subcomplex, 1, 8kDa	0.175372	0.953967	0.708022
GO:0044249	cellular biosynthetic process	AK239756.1	Sus scrofa mRNA, clone:THY010202F01, expressed in thymus		BC004465.1	54386	TERF2IP	telomeric repeat binding factor 2, interacting protein	0.175372	0.953967	0.708022
GO:0044249	cellular biosynthetic process	AY705447.1	Sus scrofa sterol response element binding protein cleavage-activating protein mRNA, partial cds	SCAP	AK300311.1	22937	SCAP	SREBF chaperone	0.175372	0.953967	0.708022
GO:0044249	cellular biosynthetic process	CF793647	889067 MARC 4PIG Sus scrofa cDNA 5', mRNA sequence						0.175372	0.953967	0.708022
GO:0044249	cellular biosynthetic process	BX914521	BX914521 Sus Scrofa library (scan) Sus scrofa cDNA clone scan0001.d.06 5prim, mRNA sequence						0.175372	0.953967	0.708022
GO:0044249	cellular biosynthetic process	BX918412	BX918412 Sus Scrofa library (scan) Sus scrofa cDNA clone scan0038.i.09 5prim, mRNA sequence						0.175372	0.953967	0.708022
GO:0044249	cellular biosynthetic process	DN123551	1123855 MARC 4PIG Sus scrofa cDNA 5', mRNA sequence						0.175372	0.953967	0.708022
GO:0044249	cellular biosynthetic process	DR120938	COG3c1 Pig pBluescript and pTrueBlue library Sus scrofa cDNA 5', mRNA sequence						0.175372	0.953967	0.708022
GO:0044249	cellular biosynthetic process	EV928670	rche13_i19.y1 che Sus scrofa cDNA 5', mRNA sequence						0.175372	0.953967	0.708022
GO:0006112	energy reserve metabolic process	CK453061	908745 MARC 4PIG Sus scrofa cDNA 5', mRNA sequence						0.177554	0.954507	3.95539
GO:0030048	actin filament-based movement	CK454645	915140 MARC 4PIG Sus scrofa cDNA 5', mRNA sequence						0.177554	0.954507	3.95539
GO:0006112	energy reserve metabolic process	EV869069	rpbfe0138_n6.y1 bfe Sus scrofa cDNA 5', mRNA sequence						0.177554	0.954507	3.95539
GO:0030048	actin filament-based movement	EW137538	reru09c_h4.y1 eru Sus scrofa cDNA 5', mRNA sequence						0.177554	0.954507	3.95539
GO:0043408	regulation of MAPKKK cascade	EW177532	rfcc24b_f2.y1 fcc Sus scrofa cDNA 5', mRNA sequence						0.177554	0.954507	3.95539
GO:0043408	regulation of MAPKKK cascade	BE014011	125574 MARC 1PIG Sus scrofa cDNA 5', mRNA sequence						0.177554	0.954507	3.95539
GO:0010557	positive regulation of macromolecule biosynthetic process	CN164178	994302 MARC 4PIG Sus scrofa cDNA 5', mRNA sequence						0.18351	0.955919	0.445839
GO:0010557	positive regulation of macromolecule biosynthetic process	DN121268	1121355 MARC 4PIG Sus scrofa cDNA 3', mRNA sequence						0.18351	0.955919	0.445839
GO:0010557	positive regulation of macromolecule biosynthetic process	EW464984	rnmm24c_m17.y1 nmm Sus scrofa cDNA 5', mRNA sequence						0.18351	0.955919	0.445839
GO:0010628	positive regulation of gene expression	DN121268	1121355 MARC 4PIG Sus scrofa cDNA 3', mRNA sequence						0.188789	0.957098	0.375329
GO:0045941	positive regulation of transcription	DN121268	1121355 MARC 4PIG Sus scrofa cDNA 3', mRNA sequence						0.188789	0.957098	0.375329
GO:0010628	positive regulation of gene expression	EW464984	rnmm24c_m17.y1 nmm Sus scrofa cDNA 5', mRNA sequence						0.188789	0.957098	0.375329
GO:0045941	positive regulation of transcription	EW464984	rnmm24c_m17.y1 nmm Sus scrofa cDNA 5', mRNA sequence						0.188789	0.957098	0.375329
GO:0006629	lipid metabolic process	AK230638.1	Sus scrofa mRNA, clone:AMP010019E02, expressed in alveolar macrophage	LOC100157274	NM_012399.3	23760	PITPNB	phosphatidylinositol transfer protein, beta	0.195096	0.958428	0.619519
GO:0006629	lipid metabolic process	AK239600.1	Sus scrofa mRNA, clone:THY010115C09, expressed in thymus		AK291127.1	1632	DCI	dodecenoyl-Coenzyme A delta isomerase (3,2 trans-enoyl-Coenzyme A isomerase)	0.195096	0.958428	0.619519
GO:0006629	lipid metabolic process	AK239646.1	Sus scrofa mRNA, clone:THY010118H06, expressed in thymus		BC066963.1	3032	HADHB	hydroxyacyl-Coenzyme A dehydrogenase/3-ketoacyl-Coenzyme A thiolase/enoyl-Coenzyme A hydratase (trifunctional protein), beta subunit	0.195096	0.958428	0.619519
GO:0006629	lipid metabolic process	AK236752.1	Sus scrofa mRNA, clone:OVRM10224E06, expressed in ovary		NM_005003.2	4706	NDUFAB1	NADH dehydrogenase (ubiquinone) 1, alpha/beta subcomplex, 1, 8kDa	0.195096	0.958428	0.619519
GO:0006629	lipid metabolic process	AY705447.1	Sus scrofa sterol response element binding protein cleavage-activating protein mRNA, partial cds	SCAP	AK300311.1	22937	SCAP	SREBF chaperone	0.195096	0.958428	0.619519
GO:0006629	lipid metabolic process	CF793647	889067 MARC 4PIG Sus scrofa cDNA 5', mRNA sequence						0.195096	0.958428	0.619519
GO:0006629	lipid metabolic process	EW429561	rnca04b_d14.y1 nca Sus scrofa cDNA 5', mRNA sequence						0.195096	0.958428	0.619519
GO:0006629	lipid metabolic process	BE235135	142484 MARC 1PIG Sus scrofa cDNA 5', mRNA sequence						0.195096	0.958428	0.619519
GO:0031324	negative regulation of cellular metabolic process	AK239756.1	Sus scrofa mRNA, clone:THY010202F01, expressed in thymus		BC004465.1	54386	TERF2IP	telomeric repeat binding factor 2, interacting protein	0.195679	0.958546	0.504119
GO:0031324	negative regulation of cellular metabolic process	CK467405	938702 MARC 4PIG Sus scrofa cDNA 5', mRNA sequence						0.195679	0.958546	0.504119
GO:0031324	negative regulation of cellular metabolic process	CK467896	939242 MARC 4PIG Sus scrofa cDNA 5', mRNA sequence						0.195679	0.958546	0.504119
GO:0031324	negative regulation of cellular metabolic process	EW421594	rnca11b_e13.y1 nca Sus scrofa cDNA 5', mRNA sequence						0.195679	0.958546	0.504119
GO:0007242	intracellular signaling cascade	AK235171.1	Sus scrofa mRNA, clone:OVRM10055D04, expressed in ovary		AF087894.1	23564	DDAH2	dimethylarginine dimethylaminohydrolase 2	0.198443	0.9591	0.6392
GO:0007242	intracellular signaling cascade	AK232555.1	Sus scrofa mRNA, clone:LVR010073A12, expressed in liver		NM_004208.2	9131	AIFM1	apoptosis-inducing factor, mitochondrion-associated, 1	0.198443	0.9591	0.6392
GO:0007242	intracellular signaling cascade	AK238982.1	Sus scrofa mRNA, clone:THY010053D09, expressed in thymus		DQ896646.2	65018	PINK1	PTEN induced putative kinase 1	0.198443	0.9591	0.6392
GO:0007242	intracellular signaling cascade	AK236416.1	Sus scrofa mRNA, clone:OVRM10189H07, expressed in ovary		NM_001071.2	7298	TYMS	thymidylate synthetase	0.198443	0.9591	0.6392
GO:0007242	intracellular signaling cascade	AY609666.1	Sus scrofa clone Clu_24219.scr.msk.p1.Contig4, mRNA sequence		NM_016041.3	51009	DERL2	Der1-like domain family, member 2	0.198443	0.9591	0.6392
GO:0007242	intracellular signaling cascade	AY610394.1	Sus scrofa clone reru31c_i7.y1.abd, mRNA sequence		NM_002495.2	4724	NDUFS4	NADH dehydrogenase (ubiquinone) Fe-S protein 4, 18kDa (NADH-coenzyme Q reductase)	0.198443	0.9591	0.6392
GO:0007242	intracellular signaling cascade	DN120593	1120622 MARC 4PIG Sus scrofa cDNA 5', mRNA sequence						0.198443	0.9591	0.6392
GO:0007242	intracellular signaling cascade	EW089566	recc2817c_e7.y1 ecc Sus scrofa cDNA 5', mRNA sequence						0.198443	0.9591	0.6392
GO:0007242	intracellular signaling cascade	EW421594	rnca11b_e13.y1 nca Sus scrofa cDNA 5', mRNA sequence						0.198443	0.9591	0.6392
GO:0006892	post-Golgi vesicle-mediated transport	BX666658	BX666658 Sus Scrofa library (scac) Sus scrofa cDNA clone scac0025.d.07 3prim, mRNA sequence						0.201985	0.959789	3.67286
GO:0006892	post-Golgi vesicle-mediated transport	CK454638	915131 MARC 4PIG Sus scrofa cDNA 5', mRNA sequence						0.201985	0.959789	3.67286
GO:0009966	regulation of signal transduction	DB788903	DB788903 full-length enriched swine cDNA library, adult adrenal gland Sus scrofa cDNA clone ADR010083F11 5', mRNA sequence						0.207897	0.960887	0.459108
GO:0009966	regulation of signal transduction	EW177532	rfcc24b_f2.y1 fcc Sus scrofa cDNA 5', mRNA sequence						0.207897	0.960887	0.459108
GO:0009966	regulation of signal transduction	BE014011	125574 MARC 1PIG Sus scrofa cDNA 5', mRNA sequence						0.207897	0.960887	0.459108
GO:0010605	negative regulation of macromolecule metabolic process	AK239756.1	Sus scrofa mRNA, clone:THY010202F01, expressed in thymus		BC004465.1	54386	TERF2IP	telomeric repeat binding factor 2, interacting protein	0.214424	0.962033	0.514201
GO:0010605	negative regulation of macromolecule metabolic process	CK467405	938702 MARC 4PIG Sus scrofa cDNA 5', mRNA sequence						0.214424	0.962033	0.514201
GO:0010605	negative regulation of macromolecule metabolic process	CK467896	939242 MARC 4PIG Sus scrofa cDNA 5', mRNA sequence						0.214424	0.962033	0.514201
GO:0010605	negative regulation of macromolecule metabolic process	EW421594	rnca11b_e13.y1 nca Sus scrofa cDNA 5', mRNA sequence						0.214424	0.962033	0.514201
GO:0044255	cellular lipid metabolic process	AK239600.1	Sus scrofa mRNA, clone:THY010115C09, expressed in thymus		AK291127.1	1632	DCI	dodecenoyl-Coenzyme A delta isomerase (3,2 trans-enoyl-Coenzyme A isomerase)	0.215952	0.962291	0.584319
GO:0044255	cellular lipid metabolic process	AK239646.1	Sus scrofa mRNA, clone:THY010118H06, expressed in thymus		BC066963.1	3032	HADHB	hydroxyacyl-Coenzyme A dehydrogenase/3-ketoacyl-Coenzyme A thiolase/enoyl-Coenzyme A hydratase (trifunctional protein), beta subunit	0.215952	0.962291	0.584319
GO:0044255	cellular lipid metabolic process	AK236752.1	Sus scrofa mRNA, clone:OVRM10224E06, expressed in ovary		NM_005003.2	4706	NDUFAB1	NADH dehydrogenase (ubiquinone) 1, alpha/beta subcomplex, 1, 8kDa	0.215952	0.962291	0.584319
GO:0044255	cellular lipid metabolic process	AY705447.1	Sus scrofa sterol response element binding protein cleavage-activating protein mRNA, partial cds	SCAP	AK300311.1	22937	SCAP	SREBF chaperone	0.215952	0.962291	0.584319
GO:0044255	cellular lipid metabolic process	CF793647	889067 MARC 4PIG Sus scrofa cDNA 5', mRNA sequence						0.215952	0.962291	0.584319
GO:0044255	cellular lipid metabolic process	BE235135	142484 MARC 1PIG Sus scrofa cDNA 5', mRNA sequence						0.215952	0.962291	0.584319
GO:0042692	muscle cell differentiation	BX925993	BX925993 Sus Scrofa library (scan) Sus scrofa cDNA clone scan0021.f.19 5prim, mRNA sequence						0.219423	0.962866	2.571
GO:0042692	muscle cell differentiation	DV904076	POSM0605028_M02R porcine skeletal muscle cDNA library (PoSM) Sus scrofa cDNA 3', mRNA sequence						0.219423	0.962866	2.571
GO:0042692	muscle cell differentiation	EV867707	rpbfe0123_n8.y1 bfe Sus scrofa cDNA 5', mRNA sequence						0.219423	0.962866	2.571
GO:0007379	segment specification	AK235345.1	Sus scrofa mRNA, clone:OVRM10071B07, expressed in ovary		NM_004529.2	4300	MLLT3	myeloid/lymphoid or mixed-lineage leukemia (trithorax homolog, Drosophila); translocated to, 3	0.224422	0.963663	8.57002
GO:0032205	negative regulation of telomere maintenance	AK239756.1	Sus scrofa mRNA, clone:THY010202F01, expressed in thymus		BC004465.1	54386	TERF2IP	telomeric repeat binding factor 2, interacting protein	0.224422	0.963663	8.57002
GO:0032204	regulation of telomere maintenance	AK239756.1	Sus scrofa mRNA, clone:THY010202F01, expressed in thymus		BC004465.1	54386	TERF2IP	telomeric repeat binding factor 2, interacting protein	0.224422	0.963663	8.57002
GO:0001967	suckling behavior	BX665103	BX665103 Sus Scrofa library (scag) Sus scrofa cDNA clone scag0004.c.03 5prim, mRNA sequence						0.224422	0.963663	8.57002
GO:0006949	syncytium formation	BX925993	BX925993 Sus Scrofa library (scan) Sus scrofa cDNA clone scan0021.f.19 5prim, mRNA sequence						0.224422	0.963663	8.57002
GO:0045663	positive regulation of myoblast differentiation	CN158607	947410 MARC 4PIG Sus scrofa cDNA 5', mRNA sequence						0.224422	0.963663	8.57002
GO:0051149	positive regulation of muscle cell differentiation	CN158607	947410 MARC 4PIG Sus scrofa cDNA 5', mRNA sequence						0.224422	0.963663	8.57002
GO:0045333	cellular respiration	AK236182.1	Sus scrofa mRNA, clone:OVRM10161E01, expressed in ovary		NM_005006.5	4719	NDUFS1	NADH dehydrogenase (ubiquinone) Fe-S protein 1, 75kDa (NADH-coenzyme Q reductase)	0.227274	0.964102	3.42801
GO:0000910	cytokinesis	AK236310.1	Sus scrofa mRNA, clone:OVRM10176E12, expressed in ovary		NM_004404.3	4735	2-Sep	septin 2	0.227274	0.964102	3.42801
GO:0045333	cellular respiration	AY610394.1	Sus scrofa clone reru31c_i7.y1.abd, mRNA sequence		NM_002495.2	4724	NDUFS4	NADH dehydrogenase (ubiquinone) Fe-S protein 4, 18kDa (NADH-coenzyme Q reductase)	0.227274	0.964102	3.42801
GO:0000910	cytokinesis	DN120593	1120622 MARC 4PIG Sus scrofa cDNA 5', mRNA sequence						0.227274	0.964102	3.42801
GO:0043170	macromolecule metabolic process	AK230890.1	Sus scrofa mRNA, clone:AMP010059F12, expressed in alveolar macrophage		NM_003968.3	9039	UBA3	ubiquitin-like modifier activating enzyme 3	0.236182	0.965409	0.848132
GO:0043170	macromolecule metabolic process	AK234461.1	Sus scrofa mRNA, clone:OVR010067A09, expressed in ovary		NM_006107.3	51747	LUC7L3	LUC7-like 3 (S. cerevisiae)	0.236182	0.965409	0.848132
GO:0043170	macromolecule metabolic process	AK237695.1	Sus scrofa mRNA, clone:SPL010081H01, expressed in spleen		BC053635.1	8602	NOP14	NOP14 nucleolar protein homolog (yeast)	0.236182	0.965409	0.848132
GO:0043170	macromolecule metabolic process	AK234932.1	Sus scrofa mRNA, clone:OVRM10033G12, expressed in ovary		AK311348.1	2189	FANCG	Fanconi anemia, complementation group G	0.236182	0.965409	0.848132
GO:0043170	macromolecule metabolic process	AK231556.1	Sus scrofa mRNA, clone:ITT010093E05, expressed in intestine		NM_004506.3	3298	HSF2	heat shock transcription factor 2	0.236182	0.965409	0.848132
GO:0043170	macromolecule metabolic process	AK235390.1	Sus scrofa mRNA, clone:OVRM10075G05, expressed in ovary		AK291935.1	118424	UBE2J2	ubiquitin-conjugating enzyme E2, J2 (UBC6 homolog, yeast)	0.236182	0.965409	0.848132
GO:0043170	macromolecule metabolic process	AK238836.1	Sus scrofa mRNA, clone:THY010035H09, expressed in thymus		NM_031992.1	7458	EIF4H	eukaryotic translation initiation factor 4H	0.236182	0.965409	0.848132
GO:0043170	macromolecule metabolic process	AK232555.1	Sus scrofa mRNA, clone:LVR010073A12, expressed in liver		NM_004208.2	9131	AIFM1	apoptosis-inducing factor, mitochondrion-associated, 1	0.236182	0.965409	0.848132
GO:0043170	macromolecule metabolic process	AK236028.1	Sus scrofa mRNA, clone:OVRM10140A03, expressed in ovary		AY358465.1	11253	MAN1B1	mannosidase, alpha, class 1B, member 1	0.236182	0.965409	0.848132
GO:0043170	macromolecule metabolic process	AK236127.1	Sus scrofa mRNA, clone:OVRM10155A01, expressed in ovary		NM_001135654.1	8761	PABPC4	poly(A) binding protein, cytoplasmic 4 (inducible form)	0.236182	0.965409	0.848132
GO:0043170	macromolecule metabolic process	AK238982.1	Sus scrofa mRNA, clone:THY010053D09, expressed in thymus		DQ896646.2	65018	PINK1	PTEN induced putative kinase 1	0.236182	0.965409	0.848132
GO:0043170	macromolecule metabolic process	AK236324.1	Sus scrofa mRNA, clone:OVRM10181E04, expressed in ovary		BC000439.2	5162	PDHB	pyruvate dehydrogenase (lipoamide) beta	0.236182	0.965409	0.848132
GO:0043170	macromolecule metabolic process	AK230569.1	Sus scrofa mRNA, clone:AMP010010H06, expressed in alveolar macrophage	----	NM_001358.2	1665	DHX15	DEAH (Asp-Glu-Ala-His) box polypeptide 15	0.236182	0.965409	0.848132
GO:0043170	macromolecule metabolic process	AK236398.1	Sus scrofa mRNA, clone:OVRM10188F03, expressed in ovary		AM746459.1	440400	RNASEK	ribonuclease, RNase K	0.236182	0.965409	0.848132
GO:0043170	macromolecule metabolic process	AK236404.1	Sus scrofa mRNA, clone:OVRM10189A09, expressed in ovary		AK297127.1	11100	HNRNPUL1	heterogeneous nuclear ribonucleoprotein U-like 1	0.236182	0.965409	0.848132
GO:0043170	macromolecule metabolic process	AK236416.1	Sus scrofa mRNA, clone:OVRM10189H07, expressed in ovary		NM_001071.2	7298	TYMS	thymidylate synthetase	0.236182	0.965409	0.848132
GO:0043170	macromolecule metabolic process	AK239600.1	Sus scrofa mRNA, clone:THY010115C09, expressed in thymus		AK291127.1	1632	DCI	dodecenoyl-Coenzyme A delta isomerase (3,2 trans-enoyl-Coenzyme A isomerase)	0.236182	0.965409	0.848132
GO:0043170	macromolecule metabolic process	AK239611.1	Sus scrofa mRNA, clone:THY010116E05, expressed in thymus		NR_003249.1	9987	HNRPDL	heterogeneous nuclear ribonucleoprotein D-like	0.236182	0.965409	0.848132
GO:0043170	macromolecule metabolic process	AK239756.1	Sus scrofa mRNA, clone:THY010202F01, expressed in thymus		BC004465.1	54386	TERF2IP	telomeric repeat binding factor 2, interacting protein	0.236182	0.965409	0.848132
GO:0043170	macromolecule metabolic process	AK233382.1	Sus scrofa mRNA, clone:LVRM10136B04, expressed in liver		CR594689.1	7884	SLBP	stem-loop binding protein	0.236182	0.965409	0.848132
GO:0043170	macromolecule metabolic process	AK233966.1	Sus scrofa mRNA, clone:MLN010082C02, expressed in mesenteric lymph node		BC107696.1	56915	EXOSC5	exosome component 5	0.236182	0.965409	0.848132
GO:0043170	macromolecule metabolic process	AY609666.1	Sus scrofa clone Clu_24219.scr.msk.p1.Contig4, mRNA sequence		NM_016041.3	51009	DERL2	Der1-like domain family, member 2	0.236182	0.965409	0.848132
GO:0043170	macromolecule metabolic process	AY609717.1	Sus scrofa clone Clu_2746.scr.msk.p1.Contig4, mRNA sequence		NM_006430.2	10575	CCT4	chaperonin containing TCP1, subunit 4 (delta)	0.236182	0.965409	0.848132
GO:0043170	macromolecule metabolic process	AY609798.1	Sus scrofa clone Clu_3164.scr.msk.p1.Contig1, mRNA sequence		AK290334.1	51319	RSRC1	arginine/serine-rich coiled-coil 1	0.236182	0.965409	0.848132
GO:0043170	macromolecule metabolic process	AY610031.1	Sus scrofa clone Clu_58583.scr.msk.p1.Contig3, mRNA sequence		NM_003616.2	8487	SIP1	survival of motor neuron protein interacting protein 1	0.236182	0.965409	0.848132
GO:0043170	macromolecule metabolic process	AY610411.1	Sus scrofa clone risp02_p18.y1.abd, mRNA sequence	TPRKB	NM_016058.2	51002	TPRKB	TP53RK binding protein	0.236182	0.965409	0.848132
GO:0043170	macromolecule metabolic process	BX664880	BX664880 Sus Scrofa library (scag) Sus scrofa cDNA clone scag0005.d.07 5prim, mRNA sequence						0.236182	0.965409	0.848132
GO:0043170	macromolecule metabolic process	BX665103	BX665103 Sus Scrofa library (scag) Sus scrofa cDNA clone scag0004.c.03 5prim, mRNA sequence						0.236182	0.965409	0.848132
GO:0043170	macromolecule metabolic process	BX667682	BX667682 Sus Scrofa library (scac) Sus scrofa cDNA clone scac0026.g.10 5prim, mRNA sequence						0.236182	0.965409	0.848132
GO:0043170	macromolecule metabolic process	CK453061	908745 MARC 4PIG Sus scrofa cDNA 5', mRNA sequence						0.236182	0.965409	0.848132
GO:0043170	macromolecule metabolic process	CK462437	933235 MARC 4PIG Sus scrofa cDNA 3', mRNA sequence						0.236182	0.965409	0.848132
GO:0043170	macromolecule metabolic process	BX914521	BX914521 Sus Scrofa library (scan) Sus scrofa cDNA clone scan0001.d.06 5prim, mRNA sequence						0.236182	0.965409	0.848132
GO:0043170	macromolecule metabolic process	BX915041	BX915041 Sus Scrofa library (scan) Sus scrofa cDNA clone scan0027.c.13 5prim, mRNA sequence						0.236182	0.965409	0.848132
GO:0043170	macromolecule metabolic process	BX918412	BX918412 Sus Scrofa library (scan) Sus scrofa cDNA clone scan0038.i.09 5prim, mRNA sequence						0.236182	0.965409	0.848132
GO:0043170	macromolecule metabolic process	CN164178	994302 MARC 4PIG Sus scrofa cDNA 5', mRNA sequence						0.236182	0.965409	0.848132
GO:0043170	macromolecule metabolic process	CJ011361	CJ011361 full-length enriched swine cDNA library, adult mesenteric lymph node Sus scrofa cDNA clone MLN01D120048 5', mRNA sequence						0.236182	0.965409	0.848132
GO:0043170	macromolecule metabolic process	CJ012192	CJ012192 full-length enriched swine cDNA library, adult mesenteric lymph node Sus scrofa cDNA clone MLN01B080058 5', mRNA sequence						0.236182	0.965409	0.848132
GO:0043170	macromolecule metabolic process	DN102168	1097048 MARC 4PIG Sus scrofa cDNA 5', mRNA sequence						0.236182	0.965409	0.848132
GO:0043170	macromolecule metabolic process	DN123551	1123855 MARC 4PIG Sus scrofa cDNA 5', mRNA sequence						0.236182	0.965409	0.848132
GO:0043170	macromolecule metabolic process	AJ950507	AJ950507 KN404_1 Sus scrofa cDNA clone C0007741i12 5', mRNA sequence						0.236182	0.965409	0.848132
GO:0043170	macromolecule metabolic process	AJ944603	AJ944603 CSEQRAN17 Sus scrofa cDNA clone C0007304f23 5', mRNA sequence						0.236182	0.965409	0.848132
GO:0043170	macromolecule metabolic process	DR120938	COG3c1 Pig pBluescript and pTrueBlue library Sus scrofa cDNA 5', mRNA sequence						0.236182	0.965409	0.848132
GO:0043170	macromolecule metabolic process	CV876956	PDUts1158D11 Porcine testis cDNA library I Sus scrofa cDNA clone PDUts1158D11 5' similar to homologue to ref|NM_013233.1| Homo sapiens serine threonine kinase 39 (STE20/SPS1 homolog, yeast) (STK39), mRNA, mRNA sequence						0.236182	0.965409	0.848132
GO:0043170	macromolecule metabolic process	DY406584	1498188 MARC 3PIG Sus scrofa cDNA 5', mRNA sequence						0.236182	0.965409	0.848132
GO:0043170	macromolecule metabolic process	DB788903	DB788903 full-length enriched swine cDNA library, adult adrenal gland Sus scrofa cDNA clone ADR010083F11 5', mRNA sequence						0.236182	0.965409	0.848132
GO:0043170	macromolecule metabolic process	EV869069	rpbfe0138_n6.y1 bfe Sus scrofa cDNA 5', mRNA sequence						0.236182	0.965409	0.848132
GO:0043170	macromolecule metabolic process	EV890051	rcad06b_b19.y1 cag Sus scrofa cDNA 5', mRNA sequence						0.236182	0.965409	0.848132
GO:0043170	macromolecule metabolic process	EV928670	rche13_i19.y1 che Sus scrofa cDNA 5', mRNA sequence						0.236182	0.965409	0.848132
GO:0043170	macromolecule metabolic process	EW290234	rjej38b_p21.y1 jej Sus scrofa cDNA 5', mRNA sequence						0.236182	0.965409	0.848132
GO:0043170	macromolecule metabolic process	EW359956	rlyg33_i2.y1 lyg Sus scrofa cDNA 5', mRNA sequence						0.236182	0.965409	0.848132
GO:0043170	macromolecule metabolic process	BE235135	142484 MARC 1PIG Sus scrofa cDNA 5', mRNA sequence						0.236182	0.965409	0.848132
GO:0009890	negative regulation of biosynthetic process	CK467405	938702 MARC 4PIG Sus scrofa cDNA 5', mRNA sequence						0.240882	0.966061	0.476112
GO:0009890	negative regulation of biosynthetic process	CK467896	939242 MARC 4PIG Sus scrofa cDNA 5', mRNA sequence						0.240882	0.966061	0.476112
GO:0009890	negative regulation of biosynthetic process	EW421594	rnca11b_e13.y1 nca Sus scrofa cDNA 5', mRNA sequence						0.240882	0.966061	0.476112
GO:0000003	reproduction	BX672955	BX672955 Sus Scrofa library (scac) Sus scrofa cDNA clone scac0044.o.04 5prim, mRNA sequence						0.248144	0.967022	0.404883
GO:0022414	reproductive process	BX672955	BX672955 Sus Scrofa library (scac) Sus scrofa cDNA clone scac0044.o.04 5prim, mRNA sequence						0.248144	0.967022	0.404883
GO:0022414	reproductive process	CX057037	PDUts2009C04 Porcine testis cDNA library II Sus scrofa cDNA clone PDUts2009C04 5' similar to homologue to ref|NM_017826.1| Homo sapiens hypothetical protein FLJ20449 (FLJ20449), mRNA, mRNA sequence						0.248144	0.967022	0.404883
GO:0000003	reproduction	CX057037	PDUts2009C04 Porcine testis cDNA library II Sus scrofa cDNA clone PDUts2009C04 5' similar to homologue to ref|NM_017826.1| Homo sapiens hypothetical protein FLJ20449 (FLJ20449), mRNA, mRNA sequence						0.248144	0.967022	0.404883
GO:0031327	negative regulation of cellular biosynthetic process	CK467405	938702 MARC 4PIG Sus scrofa cDNA 5', mRNA sequence						0.252845	0.967615	0.482063
GO:0031327	negative regulation of cellular biosynthetic process	CK467896	939242 MARC 4PIG Sus scrofa cDNA 5', mRNA sequence						0.252845	0.967615	0.482063
GO:0031327	negative regulation of cellular biosynthetic process	EW421594	rnca11b_e13.y1 nca Sus scrofa cDNA 5', mRNA sequence						0.252845	0.967615	0.482063
GO:0006898	receptor-mediated endocytosis	AK234277.1	Sus scrofa mRNA, clone:OVR010036G03, expressed in ovary		NM_213636.1	9260	PDLIM7	PDZ and LIM domain 7 (enigma)	0.253318	0.967674	3.21376
GO:0006898	receptor-mediated endocytosis	AK230559.1	Sus scrofa mRNA, clone:AMP010010A02, expressed in alveolar macrophage	----	BC064357.1	8301	PICALM	phosphatidylinositol binding clathrin assembly protein	0.253318	0.967674	3.21376
GO:0030258	lipid modification	AK239600.1	Sus scrofa mRNA, clone:THY010115C09, expressed in thymus		AK291127.1	1632	DCI	dodecenoyl-Coenzyme A delta isomerase (3,2 trans-enoyl-Coenzyme A isomerase)	0.253318	0.967674	3.21376
GO:0044264	cellular polysaccharide metabolic process	CK453061	908745 MARC 4PIG Sus scrofa cDNA 5', mRNA sequence						0.253318	0.967674	3.21376
GO:0005976	polysaccharide metabolic process	CK453061	908745 MARC 4PIG Sus scrofa cDNA 5', mRNA sequence						0.253318	0.967674	3.21376
GO:0005976	polysaccharide metabolic process	EV869069	rpbfe0138_n6.y1 bfe Sus scrofa cDNA 5', mRNA sequence						0.253318	0.967674	3.21376
GO:0044264	cellular polysaccharide metabolic process	EV869069	rpbfe0138_n6.y1 bfe Sus scrofa cDNA 5', mRNA sequence						0.253318	0.967674	3.21376
GO:0030258	lipid modification	BE235135	142484 MARC 1PIG Sus scrofa cDNA 5', mRNA sequence						0.253318	0.967674	3.21376
GO:0051179	localization	AK234277.1	Sus scrofa mRNA, clone:OVR010036G03, expressed in ovary		NM_213636.1	9260	PDLIM7	PDZ and LIM domain 7 (enigma)	0.264618	0.969011	0.83008
GO:0051179	localization	AK234386.1	Sus scrofa mRNA, clone:OVR010051H11, expressed in ovary		NM_145169.1	113402	SFT2D1	SFT2 domain containing 1	0.264618	0.969011	0.83008
GO:0051179	localization	AK231172.1	Sus scrofa mRNA, clone:ITT010006G12, expressed in intestine		BC002595.2	4713	NDUFB7	NADH dehydrogenase (ubiquinone) 1 beta subcomplex, 7, 18kDa	0.264618	0.969011	0.83008
GO:0051179	localization	AK231733.1	Sus scrofa mRNA, clone:LNG010017B08, expressed in lung		BC003417.1	4705	NDUFA10	NADH dehydrogenase (ubiquinone) 1 alpha subcomplex, 10, 42kDa	0.264618	0.969011	0.83008
GO:0051179	localization	AK231683.1	Sus scrofa mRNA, clone:LNG010007F06, expressed in lung	ARPC1B	NM_005720.2	10095	ARPC1B	actin related protein 2/3 complex, subunit 1B, 41kDa	0.264618	0.969011	0.83008
GO:0051179	localization	AK232136.1	Sus scrofa mRNA, clone:LNG010086D03, expressed in lung		AK057903.1	1318	SLC31A2	solute carrier family 31 (copper transporters), member 2	0.264618	0.969011	0.83008
GO:0051179	localization	AK230559.1	Sus scrofa mRNA, clone:AMP010010A02, expressed in alveolar macrophage	----	BC064357.1	8301	PICALM	phosphatidylinositol binding clathrin assembly protein	0.264618	0.969011	0.83008
GO:0051179	localization	AK233000.1	Sus scrofa mRNA, clone:LVRM10065H01, expressed in liver		BC028234.1	8775	NAPA	N-ethylmaleimide-sensitive factor attachment protein, alpha	0.264618	0.969011	0.83008
GO:0051179	localization	AK236601.1	Sus scrofa mRNA, clone:OVRM10207C01, expressed in ovary		AK292102.1	11015	KDELR3	KDEL (Lys-Asp-Glu-Leu) endoplasmic reticulum protein retention receptor 3	0.264618	0.969011	0.83008
GO:0051179	localization	AK236617.1	Sus scrofa mRNA, clone:OVRM10208F03, expressed in ovary		NM_203504.2	9908	G3BP2	GTPase activating protein (SH3 domain) binding protein 2	0.264618	0.969011	0.83008
GO:0051179	localization	AK236637.1	Sus scrofa mRNA, clone:OVRM10210C08, expressed in ovary		AK301837.1	25828	TXN2	thioredoxin 2	0.264618	0.969011	0.83008
GO:0051179	localization	AY609666.1	Sus scrofa clone Clu_24219.scr.msk.p1.Contig4, mRNA sequence		NM_016041.3	51009	DERL2	Der1-like domain family, member 2	0.264618	0.969011	0.83008
GO:0051179	localization	AY609726.1	Sus scrofa clone Clu_27891.scr.msk.p1.Contig1, mRNA sequence		NM_001663.3	382	ARF6	ADP-ribosylation factor 6	0.264618	0.969011	0.83008
GO:0051179	localization	BX666658	BX666658 Sus Scrofa library (scac) Sus scrofa cDNA clone scac0025.d.07 3prim, mRNA sequence						0.264618	0.969011	0.83008
GO:0051179	localization	BX667682	BX667682 Sus Scrofa library (scac) Sus scrofa cDNA clone scac0026.g.10 5prim, mRNA sequence						0.264618	0.969011	0.83008
GO:0051179	localization	BP158662	BP158662 full-length enriched swine cDNA library, adult spleen Sus scrofa cDNA clone SPL010018F11 5', mRNA sequence						0.264618	0.969011	0.83008
GO:0051179	localization	BP142174	BP142174 full-length enriched swine cDNA library, adult ovary Sus scrofa cDNA clone OVR010014C02 5', mRNA sequence						0.264618	0.969011	0.83008
GO:0051179	localization	CK454638	915131 MARC 4PIG Sus scrofa cDNA 5', mRNA sequence						0.264618	0.969011	0.83008
GO:0051179	localization	CK454645	915140 MARC 4PIG Sus scrofa cDNA 5', mRNA sequence						0.264618	0.969011	0.83008
GO:0051179	localization	CK460216	930472 MARC 4PIG Sus scrofa cDNA 5', mRNA sequence						0.264618	0.969011	0.83008
GO:0051179	localization	BX925993	BX925993 Sus Scrofa library (scan) Sus scrofa cDNA clone scan0021.f.19 5prim, mRNA sequence						0.264618	0.969011	0.83008
GO:0051179	localization	CN157675	946398 MARC 4PIG Sus scrofa cDNA 5', mRNA sequence						0.264618	0.969011	0.83008
GO:0051179	localization	CJ011598	CJ011598 full-length enriched swine cDNA library, adult mesenteric lymph node Sus scrofa cDNA clone MLN01C070051 5', mRNA sequence						0.264618	0.969011	0.83008
GO:0051179	localization	DN104456	1100249 MARC 4PIG Sus scrofa cDNA 5', mRNA sequence						0.264618	0.969011	0.83008
GO:0051179	localization	DN111105	1110192 MARC 4PIG Sus scrofa cDNA 5', mRNA sequence						0.264618	0.969011	0.83008
GO:0051179	localization	DR120938	COG3c1 Pig pBluescript and pTrueBlue library Sus scrofa cDNA 5', mRNA sequence						0.264618	0.969011	0.83008
GO:0051179	localization	AK234908	Sus scrofa mRNA, clone:OVRM10028H08, expressed in ovary	LOC595127	AB097051.1	10550	ARL6IP5	ADP-ribosylation-like factor 6 interacting protein 5	0.264618	0.969011	0.83008
GO:0051179	localization	DT324183	SusFleck_BF_0033_0036_5_pCNS_D01 SusFleck Backfat Sus scrofa cDNA clone 0033_0036_D01 5', mRNA sequence						0.264618	0.969011	0.83008
GO:0051179	localization	EV889890	rcad24b_f12.y1 cag Sus scrofa cDNA 5', mRNA sequence						0.264618	0.969011	0.83008
GO:0051179	localization	EH412738	TL505101 Sus LongSAGE/GLGI Express Library Sus scrofa cDNA, mRNA sequence						0.264618	0.969011	0.83008
GO:0051179	localization	EV984595	rcmu37_l22.y1 cmu Sus scrofa cDNA 5', mRNA sequence						0.264618	0.969011	0.83008
GO:0051179	localization	EW115068	reje08b_c22.y1 eje Sus scrofa cDNA 5', mRNA sequence						0.264618	0.969011	0.83008
GO:0051179	localization	EW137538	reru09c_h4.y1 eru Sus scrofa cDNA 5', mRNA sequence						0.264618	0.969011	0.83008
GO:0051179	localization	EW177532	rfcc24b_f2.y1 fcc Sus scrofa cDNA 5', mRNA sequence						0.264618	0.969011	0.83008
GO:0051179	localization	EW245573	rhlv30b_n22.y1 hlv Sus scrofa cDNA 5', mRNA sequence						0.264618	0.969011	0.83008
GO:0051179	localization	EW367525	rmas918b_h23.y1 mas Sus scrofa cDNA 5', mRNA sequence						0.264618	0.969011	0.83008
GO:0051179	localization	EW407282	rmgp039_f21.y1 mgp Sus scrofa cDNA 5', mRNA sequence						0.264618	0.969011	0.83008
GO:0010558	negative regulation of macromolecule biosynthetic process	CK467405	938702 MARC 4PIG Sus scrofa cDNA 5', mRNA sequence						0.271749	0.9698	0.491275
GO:0010558	negative regulation of macromolecule biosynthetic process	CK467896	939242 MARC 4PIG Sus scrofa cDNA 5', mRNA sequence						0.271749	0.9698	0.491275
GO:0010558	negative regulation of macromolecule biosynthetic process	EW421594	rnca11b_e13.y1 nca Sus scrofa cDNA 5', mRNA sequence						0.271749	0.9698	0.491275
GO:0006793	phosphorus metabolic process	AK238949.1	Sus scrofa mRNA, clone:THY010050G08, expressed in thymus		NM_001567.3	3636	INPPL1	inositol polyphosphate phosphatase-like 1	0.282111	0.970877	0.640464
GO:0006796	phosphate metabolic process	AK238949.1	Sus scrofa mRNA, clone:THY010050G08, expressed in thymus		NM_001567.3	3636	INPPL1	inositol polyphosphate phosphatase-like 1	0.282111	0.970877	0.640464
GO:0006796	phosphate metabolic process	AK238982.1	Sus scrofa mRNA, clone:THY010053D09, expressed in thymus		DQ896646.2	65018	PINK1	PTEN induced putative kinase 1	0.282111	0.970877	0.640464
GO:0006793	phosphorus metabolic process	AK238982.1	Sus scrofa mRNA, clone:THY010053D09, expressed in thymus		DQ896646.2	65018	PINK1	PTEN induced putative kinase 1	0.282111	0.970877	0.640464
GO:0006796	phosphate metabolic process	AK236182.1	Sus scrofa mRNA, clone:OVRM10161E01, expressed in ovary		NM_005006.5	4719	NDUFS1	NADH dehydrogenase (ubiquinone) Fe-S protein 1, 75kDa (NADH-coenzyme Q reductase)	0.282111	0.970877	0.640464
GO:0006793	phosphorus metabolic process	AK236182.1	Sus scrofa mRNA, clone:OVRM10161E01, expressed in ovary		NM_005006.5	4719	NDUFS1	NADH dehydrogenase (ubiquinone) Fe-S protein 1, 75kDa (NADH-coenzyme Q reductase)	0.282111	0.970877	0.640464
GO:0006796	phosphate metabolic process	AK236752.1	Sus scrofa mRNA, clone:OVRM10224E06, expressed in ovary		NM_005003.2	4706	NDUFAB1	NADH dehydrogenase (ubiquinone) 1, alpha/beta subcomplex, 1, 8kDa	0.282111	0.970877	0.640464
GO:0006793	phosphorus metabolic process	AK236752.1	Sus scrofa mRNA, clone:OVRM10224E06, expressed in ovary		NM_005003.2	4706	NDUFAB1	NADH dehydrogenase (ubiquinone) 1, alpha/beta subcomplex, 1, 8kDa	0.282111	0.970877	0.640464
GO:0006796	phosphate metabolic process	CV876956	PDUts1158D11 Porcine testis cDNA library I Sus scrofa cDNA clone PDUts1158D11 5' similar to homologue to ref|NM_013233.1| Homo sapiens serine threonine kinase 39 (STE20/SPS1 homolog, yeast) (STK39), mRNA, mRNA sequence						0.282111	0.970877	0.640464
GO:0006793	phosphorus metabolic process	CV876956	PDUts1158D11 Porcine testis cDNA library I Sus scrofa cDNA clone PDUts1158D11 5' similar to homologue to ref|NM_013233.1| Homo sapiens serine threonine kinase 39 (STE20/SPS1 homolog, yeast) (STK39), mRNA, mRNA sequence						0.282111	0.970877	0.640464
GO:0006796	phosphate metabolic process	DB788903	DB788903 full-length enriched swine cDNA library, adult adrenal gland Sus scrofa cDNA clone ADR010083F11 5', mRNA sequence						0.282111	0.970877	0.640464
GO:0006793	phosphorus metabolic process	DB788903	DB788903 full-length enriched swine cDNA library, adult adrenal gland Sus scrofa cDNA clone ADR010083F11 5', mRNA sequence						0.282111	0.970877	0.640464
GO:0006796	phosphate metabolic process	BE235135	142484 MARC 1PIG Sus scrofa cDNA 5', mRNA sequence						0.282111	0.970877	0.640464
GO:0006793	phosphorus metabolic process	BE235135	142484 MARC 1PIG Sus scrofa cDNA 5', mRNA sequence						0.282111	0.970877	0.640464
GO:0006525	arginine metabolic process	AK235171.1	Sus scrofa mRNA, clone:OVRM10055D04, expressed in ovary		AF087894.1	23564	DDAH2	dimethylarginine dimethylaminohydrolase 2	0.293493	0.971975	6.42751
GO:0035282	segmentation	AK235345.1	Sus scrofa mRNA, clone:OVRM10071B07, expressed in ovary		NM_004529.2	4300	MLLT3	myeloid/lymphoid or mixed-lineage leukemia (trithorax homolog, Drosophila); translocated to, 3	0.293493	0.971975	6.42751
GO:0006825	copper ion transport	AK232136.1	Sus scrofa mRNA, clone:LNG010086D03, expressed in lung		AK057903.1	1318	SLC31A2	solute carrier family 31 (copper transporters), member 2	0.293493	0.971975	6.42751
GO:0032845	negative regulation of homeostatic process	AK239756.1	Sus scrofa mRNA, clone:THY010202F01, expressed in thymus		BC004465.1	54386	TERF2IP	telomeric repeat binding factor 2, interacting protein	0.293493	0.971975	6.42751
GO:0034620	cellular response to unfolded protein	AY609666.1	Sus scrofa clone Clu_24219.scr.msk.p1.Contig4, mRNA sequence		NM_016041.3	51009	DERL2	Der1-like domain family, member 2	0.293493	0.971975	6.42751
GO:0030968	endoplasmic reticulum unfolded protein response	AY609666.1	Sus scrofa clone Clu_24219.scr.msk.p1.Contig4, mRNA sequence		NM_016041.3	51009	DERL2	Der1-like domain family, member 2	0.293493	0.971975	6.42751
GO:0014902	myotube differentiation	BX925993	BX925993 Sus Scrofa library (scan) Sus scrofa cDNA clone scan0021.f.19 5prim, mRNA sequence						0.293493	0.971975	6.42751
GO:0045026	plasma membrane fusion	BX925993	BX925993 Sus Scrofa library (scan) Sus scrofa cDNA clone scan0021.f.19 5prim, mRNA sequence						0.293493	0.971975	6.42751
GO:0045661	regulation of myoblast differentiation	CN158607	947410 MARC 4PIG Sus scrofa cDNA 5', mRNA sequence						0.293493	0.971975	6.42751
GO:0048742	regulation of skeletal muscle fiber development	CN158607	947410 MARC 4PIG Sus scrofa cDNA 5', mRNA sequence						0.293493	0.971975	6.42751
GO:0033365	protein localization in organelle	DR120938	COG3c1 Pig pBluescript and pTrueBlue library Sus scrofa cDNA 5', mRNA sequence						0.293493	0.971975	6.42751
GO:0007492	endoderm development	DT324183	SusFleck_BF_0033_0036_5_pCNS_D01 SusFleck Backfat Sus scrofa cDNA clone 0033_0036_D01 5', mRNA sequence						0.293493	0.971975	6.42751
GO:0035272	exocrine system development	EW158560	reye1608b_e17.y1 eye Sus scrofa cDNA 5', mRNA sequence						0.293493	0.971975	6.42751
GO:0007194	negative regulation of adenylate cyclase activity	EW407282	rmgp039_f21.y1 mgp Sus scrofa cDNA 5', mRNA sequence						0.293493	0.971975	6.42751
GO:0031280	negative regulation of cyclase activity	EW407282	rmgp039_f21.y1 mgp Sus scrofa cDNA 5', mRNA sequence						0.293493	0.971975	6.42751
GO:0051350	negative regulation of lyase activity	EW407282	rmgp039_f21.y1 mgp Sus scrofa cDNA 5', mRNA sequence						0.293493	0.971975	6.42751
GO:0046330	positive regulation of JNK cascade	BE014011	125574 MARC 1PIG Sus scrofa cDNA 5', mRNA sequence						0.293493	0.971975	6.42751
GO:0060070	Wnt receptor signaling pathway through beta-catenin	BE014011	125574 MARC 1PIG Sus scrofa cDNA 5', mRNA sequence						0.293493	0.971975	6.42751
GO:0046854	phosphoinositide phosphorylation	BE235135	142484 MARC 1PIG Sus scrofa cDNA 5', mRNA sequence						0.293493	0.971975	6.42751
GO:0006915	apoptosis	AK234461.1	Sus scrofa mRNA, clone:OVR010067A09, expressed in ovary		NM_006107.3	51747	LUC7L3	LUC7-like 3 (S. cerevisiae)	0.293713	0.971995	1.50254
GO:0006915	apoptosis	AK235603.1	Sus scrofa mRNA, clone:OVRM10097A03, expressed in ovary		NM_003374.1	7416	VDAC1	voltage-dependent anion channel 1	0.293713	0.971995	1.50254
GO:0006915	apoptosis	AK232555.1	Sus scrofa mRNA, clone:LVR010073A12, expressed in liver		NM_004208.2	9131	AIFM1	apoptosis-inducing factor, mitochondrion-associated, 1	0.293713	0.971995	1.50254
GO:0006915	apoptosis	AK236182.1	Sus scrofa mRNA, clone:OVRM10161E01, expressed in ovary		NM_005006.5	4719	NDUFS1	NADH dehydrogenase (ubiquinone) Fe-S protein 1, 75kDa (NADH-coenzyme Q reductase)	0.293713	0.971995	1.50254
GO:0006915	apoptosis	AK239887.1	Sus scrofa mRNA, clone:UTR010007G10, expressed in uterus		DQ896345.2	5134	PDCD2	programmed cell death 2	0.293713	0.971995	1.50254
GO:0006915	apoptosis	AY610295.1	Sus scrofa clone rcsk04_o4.y1.abd, mRNA sequence		BC015519.2	9141	PDCD5	programmed cell death 5	0.293713	0.971995	1.50254
GO:0006915	apoptosis	BX924637	BX924637 Sus Scrofa library (scan) Sus scrofa cDNA clone scan0017.d.21 5prim, mRNA sequence						0.293713	0.971995	1.50254
GO:0006915	apoptosis	DN124736	1138534 MARC 4PIG Sus scrofa cDNA 5', mRNA sequence						0.293713	0.971995	1.50254
GO:0006915	apoptosis	EW421594	rnca11b_e13.y1 nca Sus scrofa cDNA 5', mRNA sequence						0.293713	0.971995	1.50254
GO:0051276	chromosome organization	AK239756.1	Sus scrofa mRNA, clone:THY010202F01, expressed in thymus		BC004465.1	54386	TERF2IP	telomeric repeat binding factor 2, interacting protein	0.299038	0.97248	0.555893
GO:0051276	chromosome organization	AK237149.1	Sus scrofa mRNA, clone:SPL010004H09, expressed in spleen		AK092008.1	54892	NCAPG2	non-SMC condensin II complex, subunit G2	0.299038	0.97248	0.555893
GO:0051276	chromosome organization	CK452762	908422 MARC 4PIG Sus scrofa cDNA 5', mRNA sequence						0.299038	0.97248	0.555893
GO:0051276	chromosome organization	BX918412	BX918412 Sus Scrofa library (scan) Sus scrofa cDNA clone scan0038.i.09 5prim, mRNA sequence						0.299038	0.97248	0.555893
GO:0046907	intracellular transport	AK233000.1	Sus scrofa mRNA, clone:LVRM10065H01, expressed in liver		BC028234.1	8775	NAPA	N-ethylmaleimide-sensitive factor attachment protein, alpha	0.303918	0.97291	0.669969
GO:0046907	intracellular transport	AY609666.1	Sus scrofa clone Clu_24219.scr.msk.p1.Contig4, mRNA sequence		NM_016041.3	51009	DERL2	Der1-like domain family, member 2	0.303918	0.97291	0.669969
GO:0046907	intracellular transport	BX666658	BX666658 Sus Scrofa library (scac) Sus scrofa cDNA clone scac0025.d.07 3prim, mRNA sequence						0.303918	0.97291	0.669969
GO:0046907	intracellular transport	CK454638	915131 MARC 4PIG Sus scrofa cDNA 5', mRNA sequence						0.303918	0.97291	0.669969
GO:0046907	intracellular transport	CK454645	915140 MARC 4PIG Sus scrofa cDNA 5', mRNA sequence						0.303918	0.97291	0.669969
GO:0046907	intracellular transport	DR120938	COG3c1 Pig pBluescript and pTrueBlue library Sus scrofa cDNA 5', mRNA sequence						0.303918	0.97291	0.669969
GO:0046907	intracellular transport	EV984595	rcmu37_l22.y1 cmu Sus scrofa cDNA 5', mRNA sequence						0.303918	0.97291	0.669969
GO:0046907	intracellular transport	EW137538	reru09c_h4.y1 eru Sus scrofa cDNA 5', mRNA sequence						0.303918	0.97291	0.669969
GO:0008629	induction of apoptosis by intracellular signals	AK232555.1	Sus scrofa mRNA, clone:LVR010073A12, expressed in liver		NM_004208.2	9131	AIFM1	apoptosis-inducing factor, mitochondrion-associated, 1	0.307286	0.973199	2.85667
GO:0008629	induction of apoptosis by intracellular signals	BX915041	BX915041 Sus Scrofa library (scan) Sus scrofa cDNA clone scan0027.c.13 5prim, mRNA sequence						0.307286	0.973199	2.85667
GO:0030036	actin cytoskeleton organization	DV904076	POSM0605028_M02R porcine skeletal muscle cDNA library (PoSM) Sus scrofa cDNA 3', mRNA sequence						0.313132	0.973686	0.306072
GO:0006812	cation transport	AK232136.1	Sus scrofa mRNA, clone:LNG010086D03, expressed in lung		AK057903.1	1318	SLC31A2	solute carrier family 31 (copper transporters), member 2	0.315146	0.97385	0.435763
GO:0006812	cation transport	EW367525	rmas918b_h23.y1 mas Sus scrofa cDNA 5', mRNA sequence						0.315146	0.97385	0.435763
GO:0012501	programmed cell death	AK234461.1	Sus scrofa mRNA, clone:OVR010067A09, expressed in ovary		NM_006107.3	51747	LUC7L3	LUC7-like 3 (S. cerevisiae)	0.318365	0.974107	1.47382
GO:0012501	programmed cell death	AK235603.1	Sus scrofa mRNA, clone:OVRM10097A03, expressed in ovary		NM_003374.1	7416	VDAC1	voltage-dependent anion channel 1	0.318365	0.974107	1.47382
GO:0012501	programmed cell death	AK232555.1	Sus scrofa mRNA, clone:LVR010073A12, expressed in liver		NM_004208.2	9131	AIFM1	apoptosis-inducing factor, mitochondrion-associated, 1	0.318365	0.974107	1.47382
GO:0012501	programmed cell death	AK236182.1	Sus scrofa mRNA, clone:OVRM10161E01, expressed in ovary		NM_005006.5	4719	NDUFS1	NADH dehydrogenase (ubiquinone) Fe-S protein 1, 75kDa (NADH-coenzyme Q reductase)	0.318365	0.974107	1.47382
GO:0012501	programmed cell death	AK239887.1	Sus scrofa mRNA, clone:UTR010007G10, expressed in uterus		DQ896345.2	5134	PDCD2	programmed cell death 2	0.318365	0.974107	1.47382
GO:0012501	programmed cell death	AY610295.1	Sus scrofa clone rcsk04_o4.y1.abd, mRNA sequence		BC015519.2	9141	PDCD5	programmed cell death 5	0.318365	0.974107	1.47382
GO:0012501	programmed cell death	BX924637	BX924637 Sus Scrofa library (scan) Sus scrofa cDNA clone scan0017.d.21 5prim, mRNA sequence						0.318365	0.974107	1.47382
GO:0012501	programmed cell death	DN124736	1138534 MARC 4PIG Sus scrofa cDNA 5', mRNA sequence						0.318365	0.974107	1.47382
GO:0012501	programmed cell death	EW421594	rnca11b_e13.y1 nca Sus scrofa cDNA 5', mRNA sequence						0.318365	0.974107	1.47382
GO:0019953	sexual reproduction	CX057037	PDUts2009C04 Porcine testis cDNA library II Sus scrofa cDNA clone PDUts2009C04 5' similar to homologue to ref|NM_017826.1| Homo sapiens hypothetical protein FLJ20449 (FLJ20449), mRNA, mRNA sequence						0.332823	0.975204	0.313537
GO:0006800	oxygen and reactive oxygen species metabolic process	AK236182.1	Sus scrofa mRNA, clone:OVRM10161E01, expressed in ovary		NM_005006.5	4719	NDUFS1	NADH dehydrogenase (ubiquinone) Fe-S protein 1, 75kDa (NADH-coenzyme Q reductase)	0.335037	0.975364	2.70632
GO:0006800	oxygen and reactive oxygen species metabolic process	AY610394.1	Sus scrofa clone reru31c_i7.y1.abd, mRNA sequence		NM_002495.2	4724	NDUFS4	NADH dehydrogenase (ubiquinone) Fe-S protein 4, 18kDa (NADH-coenzyme Q reductase)	0.335037	0.975364	2.70632
GO:0022610	biological adhesion	AF329358.1	Sus scrofa laminin beta-1 chain mRNA, partial cds	LAMB1	NM_002291.2	3912	LAMB1	laminin, beta 1	0.342355	0.975878	0.642751
GO:0007155	cell adhesion	AF329358.1	Sus scrofa laminin beta-1 chain mRNA, partial cds	LAMB1	NM_002291.2	3912	LAMB1	laminin, beta 1	0.342355	0.975878	0.642751
GO:0022610	biological adhesion	AB237777.1	Sus scrofa COL6A1 mRNA fortype VI collagen alpha-1 chain, partial cds, C-terminal domain	COL6A1	NM_001848.2	1291	COL6A1	collagen, type VI, alpha 1	0.342355	0.975878	0.642751
GO:0007155	cell adhesion	AB237777.1	Sus scrofa COL6A1 mRNA fortype VI collagen alpha-1 chain, partial cds, C-terminal domain	COL6A1	NM_001848.2	1291	COL6A1	collagen, type VI, alpha 1	0.342355	0.975878	0.642751
GO:0022610	biological adhesion	BX923548	BX923548 Sus Scrofa library (scan) Sus scrofa cDNA clone scan0012.k.22 5prim, mRNA sequence						0.342355	0.975878	0.642751
GO:0007155	cell adhesion	BX923548	BX923548 Sus Scrofa library (scan) Sus scrofa cDNA clone scan0012.k.22 5prim, mRNA sequence						0.342355	0.975878	0.642751
GO:0007155	cell adhesion	DN121268	1121355 MARC 4PIG Sus scrofa cDNA 3', mRNA sequence						0.342355	0.975878	0.642751
GO:0022610	biological adhesion	DN121268	1121355 MARC 4PIG Sus scrofa cDNA 3', mRNA sequence						0.342355	0.975878	0.642751
GO:0007155	cell adhesion	DT324183	SusFleck_BF_0033_0036_5_pCNS_D01 SusFleck Backfat Sus scrofa cDNA clone 0033_0036_D01 5', mRNA sequence						0.342355	0.975878	0.642751
GO:0022610	biological adhesion	DT324183	SusFleck_BF_0033_0036_5_pCNS_D01 SusFleck Backfat Sus scrofa cDNA clone 0033_0036_D01 5', mRNA sequence						0.342355	0.975878	0.642751
GO:0007155	cell adhesion	BG385044	306626 MARC 1PIG Sus scrofa cDNA 5', mRNA sequence						0.342355	0.975878	0.642751
GO:0022610	biological adhesion	BG385044	306626 MARC 1PIG Sus scrofa cDNA 5', mRNA sequence						0.342355	0.975878	0.642751
GO:0008361	regulation of cell size	AY609666.1	Sus scrofa clone Clu_24219.scr.msk.p1.Contig4, mRNA sequence		NM_016041.3	51009	DERL2	Der1-like domain family, member 2	0.345829	0.976115	1.83643
GO:0008361	regulation of cell size	DV904076	POSM0605028_M02R porcine skeletal muscle cDNA library (PoSM) Sus scrofa cDNA 3', mRNA sequence						0.345829	0.976115	1.83643
GO:0008361	regulation of cell size	EW421594	rnca11b_e13.y1 nca Sus scrofa cDNA 5', mRNA sequence						0.345829	0.976115	1.83643
GO:0008361	regulation of cell size	BE235135	142484 MARC 1PIG Sus scrofa cDNA 5', mRNA sequence						0.345829	0.976115	1.83643
GO:0030308	negative regulation of cell growth	DV904076	POSM0605028_M02R porcine skeletal muscle cDNA library (PoSM) Sus scrofa cDNA 3', mRNA sequence						0.346222	0.976141	2.0846
GO:0045792	negative regulation of cell size	DV904076	POSM0605028_M02R porcine skeletal muscle cDNA library (PoSM) Sus scrofa cDNA 3', mRNA sequence						0.346222	0.976141	2.0846
GO:0045792	negative regulation of cell size	EW421594	rnca11b_e13.y1 nca Sus scrofa cDNA 5', mRNA sequence						0.346222	0.976141	2.0846
GO:0030308	negative regulation of cell growth	EW421594	rnca11b_e13.y1 nca Sus scrofa cDNA 5', mRNA sequence						0.346222	0.976141	2.0846
GO:0045792	negative regulation of cell size	BE235135	142484 MARC 1PIG Sus scrofa cDNA 5', mRNA sequence						0.346222	0.976141	2.0846
GO:0030308	negative regulation of cell growth	BE235135	142484 MARC 1PIG Sus scrofa cDNA 5', mRNA sequence						0.346222	0.976141	2.0846
GO:0045184	establishment of protein localization	AK234386.1	Sus scrofa mRNA, clone:OVR010051H11, expressed in ovary		NM_145169.1	113402	SFT2D1	SFT2 domain containing 1	0.353261	0.976605	0.690203
GO:0045184	establishment of protein localization	AK233000.1	Sus scrofa mRNA, clone:LVRM10065H01, expressed in liver		BC028234.1	8775	NAPA	N-ethylmaleimide-sensitive factor attachment protein, alpha	0.353261	0.976605	0.690203
GO:0045184	establishment of protein localization	AK236601.1	Sus scrofa mRNA, clone:OVRM10207C01, expressed in ovary		AK292102.1	11015	KDELR3	KDEL (Lys-Asp-Glu-Leu) endoplasmic reticulum protein retention receptor 3	0.353261	0.976605	0.690203
GO:0045184	establishment of protein localization	AY609666.1	Sus scrofa clone Clu_24219.scr.msk.p1.Contig4, mRNA sequence		NM_016041.3	51009	DERL2	Der1-like domain family, member 2	0.353261	0.976605	0.690203
GO:0045184	establishment of protein localization	AY609726.1	Sus scrofa clone Clu_27891.scr.msk.p1.Contig1, mRNA sequence		NM_001663.3	382	ARF6	ADP-ribosylation factor 6	0.353261	0.976605	0.690203
GO:0045184	establishment of protein localization	CK454638	915131 MARC 4PIG Sus scrofa cDNA 5', mRNA sequence						0.353261	0.976605	0.690203
GO:0045184	establishment of protein localization	DN104456	1100249 MARC 4PIG Sus scrofa cDNA 5', mRNA sequence						0.353261	0.976605	0.690203
GO:0045184	establishment of protein localization	EV984595	rcmu37_l22.y1 cmu Sus scrofa cDNA 5', mRNA sequence						0.353261	0.976605	0.690203
GO:0050890	cognition	BX665103	BX665103 Sus Scrofa library (scag) Sus scrofa cDNA clone scag0004.c.03 5prim, mRNA sequence						0.353625	0.976629	0.321376
GO:0006555	methionine metabolic process	AK240417.1	Sus scrofa mRNA, clone:UTR010066E08, expressed in uterus		AB073609.1	55256	ADI1	acireductone dioxygenase 1	0.35988	0.977026	5.14201
GO:0009066	aspartate family amino acid metabolic process	AK240417.1	Sus scrofa mRNA, clone:UTR010066E08, expressed in uterus		AB073609.1	55256	ADI1	acireductone dioxygenase 1	0.35988	0.977026	5.14201
GO:0006541	glutamine metabolic process	AK231755.1	Sus scrofa mRNA, clone:LNG010019G08, expressed in lung		BC008723.2	440	ASNS	asparagine synthetase	0.35988	0.977026	5.14201
GO:0031124	mRNA 3'-end processing	AK233382.1	Sus scrofa mRNA, clone:LVRM10136B04, expressed in liver		CR594689.1	7884	SLBP	stem-loop binding protein	0.35988	0.977026	5.14201
GO:0045793	positive regulation of cell size	AY609666.1	Sus scrofa clone Clu_24219.scr.msk.p1.Contig4, mRNA sequence		NM_016041.3	51009	DERL2	Der1-like domain family, member 2	0.35988	0.977026	5.14201
GO:0030307	positive regulation of cell growth	AY609666.1	Sus scrofa clone Clu_24219.scr.msk.p1.Contig4, mRNA sequence		NM_016041.3	51009	DERL2	Der1-like domain family, member 2	0.35988	0.977026	5.14201
GO:0051591	response to cAMP	AY610394.1	Sus scrofa clone reru31c_i7.y1.abd, mRNA sequence		NM_002495.2	4724	NDUFS4	NADH dehydrogenase (ubiquinone) Fe-S protein 4, 18kDa (NADH-coenzyme Q reductase)	0.35988	0.977026	5.14201
GO:0033059	cellular pigmentation	BP158662	BP158662 full-length enriched swine cDNA library, adult spleen Sus scrofa cDNA clone SPL010018F11 5', mRNA sequence						0.35988	0.977026	5.14201
GO:0006939	smooth muscle contraction	CK454645	915140 MARC 4PIG Sus scrofa cDNA 5', mRNA sequence						0.35988	0.977026	5.14201
GO:0009798	axis specification	BX923538	BX923538 Sus Scrofa library (scan) Sus scrofa cDNA clone scan0014.h.08 5prim, mRNA sequence						0.35988	0.977026	5.14201
GO:0051147	regulation of muscle cell differentiation	CN158607	947410 MARC 4PIG Sus scrofa cDNA 5', mRNA sequence						0.35988	0.977026	5.14201
GO:0002381	immunoglobulin production during immune response	CN164178	994302 MARC 4PIG Sus scrofa cDNA 5', mRNA sequence						0.35988	0.977026	5.14201
GO:0002204	somatic recombination of immunoglobulin genes during immune response	CN164178	994302 MARC 4PIG Sus scrofa cDNA 5', mRNA sequence						0.35988	0.977026	5.14201
GO:0002208	somatic diversification of immunoglobulins during immune response	CN164178	994302 MARC 4PIG Sus scrofa cDNA 5', mRNA sequence						0.35988	0.977026	5.14201
GO:0045190	isotype switching	CN164178	994302 MARC 4PIG Sus scrofa cDNA 5', mRNA sequence						0.35988	0.977026	5.14201
GO:0034613	cellular protein localization	DR120938	COG3c1 Pig pBluescript and pTrueBlue library Sus scrofa cDNA 5', mRNA sequence						0.35988	0.977026	5.14201
GO:0017157	regulation of exocytosis	EW158560	reye1608b_e17.y1 eye Sus scrofa cDNA 5', mRNA sequence						0.35988	0.977026	5.14201
GO:0046834	lipid phosphorylation	BE235135	142484 MARC 1PIG Sus scrofa cDNA 5', mRNA sequence						0.35988	0.977026	5.14201
GO:0015031	protein transport	AK234386.1	Sus scrofa mRNA, clone:OVR010051H11, expressed in ovary		NM_145169.1	113402	SFT2D1	SFT2 domain containing 1	0.365019	0.977342	0.694866
GO:0015031	protein transport	AK233000.1	Sus scrofa mRNA, clone:LVRM10065H01, expressed in liver		BC028234.1	8775	NAPA	N-ethylmaleimide-sensitive factor attachment protein, alpha	0.365019	0.977342	0.694866
GO:0015031	protein transport	AK236601.1	Sus scrofa mRNA, clone:OVRM10207C01, expressed in ovary		AK292102.1	11015	KDELR3	KDEL (Lys-Asp-Glu-Leu) endoplasmic reticulum protein retention receptor 3	0.365019	0.977342	0.694866
GO:0015031	protein transport	AY609666.1	Sus scrofa clone Clu_24219.scr.msk.p1.Contig4, mRNA sequence		NM_016041.3	51009	DERL2	Der1-like domain family, member 2	0.365019	0.977342	0.694866
GO:0015031	protein transport	AY609726.1	Sus scrofa clone Clu_27891.scr.msk.p1.Contig1, mRNA sequence		NM_001663.3	382	ARF6	ADP-ribosylation factor 6	0.365019	0.977342	0.694866
GO:0015031	protein transport	CK454638	915131 MARC 4PIG Sus scrofa cDNA 5', mRNA sequence						0.365019	0.977342	0.694866
GO:0015031	protein transport	DN104456	1100249 MARC 4PIG Sus scrofa cDNA 5', mRNA sequence						0.365019	0.977342	0.694866
GO:0015031	protein transport	EV984595	rcmu37_l22.y1 cmu Sus scrofa cDNA 5', mRNA sequence						0.365019	0.977342	0.694866
GO:0006886	intracellular protein transport	AK233000.1	Sus scrofa mRNA, clone:LVRM10065H01, expressed in liver		BC028234.1	8775	NAPA	N-ethylmaleimide-sensitive factor attachment protein, alpha	0.369624	0.977618	0.587658
GO:0006886	intracellular protein transport	AY609666.1	Sus scrofa clone Clu_24219.scr.msk.p1.Contig4, mRNA sequence		NM_016041.3	51009	DERL2	Der1-like domain family, member 2	0.369624	0.977618	0.587658
GO:0006886	intracellular protein transport	CK454638	915131 MARC 4PIG Sus scrofa cDNA 5', mRNA sequence						0.369624	0.977618	0.587658
GO:0006886	intracellular protein transport	EV984595	rcmu37_l22.y1 cmu Sus scrofa cDNA 5', mRNA sequence						0.369624	0.977618	0.587658
GO:0045595	regulation of cell differentiation	CN158607	947410 MARC 4PIG Sus scrofa cDNA 5', mRNA sequence						0.375587	0.977965	0.329616
GO:0010647	positive regulation of cell communication	BE014011	125574 MARC 1PIG Sus scrofa cDNA 5', mRNA sequence						0.375587	0.977965	0.329616
GO:0006310	DNA recombination	BX664880	BX664880 Sus Scrofa library (scag) Sus scrofa cDNA clone scag0005.d.07 5prim, mRNA sequence						0.385621	0.978526	1.9777
GO:0006310	DNA recombination	CN164178	994302 MARC 4PIG Sus scrofa cDNA 5', mRNA sequence						0.385621	0.978526	1.9777
GO:0006310	DNA recombination	AJ950507	AJ950507 KN404_1 Sus scrofa cDNA clone C0007741i12 5', mRNA sequence						0.385621	0.978526	1.9777
GO:0045926	negative regulation of growth	DV904076	POSM0605028_M02R porcine skeletal muscle cDNA library (PoSM) Sus scrofa cDNA 3', mRNA sequence						0.385621	0.978526	1.9777
GO:0045926	negative regulation of growth	EW421594	rnca11b_e13.y1 nca Sus scrofa cDNA 5', mRNA sequence						0.385621	0.978526	1.9777
GO:0045926	negative regulation of growth	BE235135	142484 MARC 1PIG Sus scrofa cDNA 5', mRNA sequence						0.385621	0.978526	1.9777
GO:0009967	positive regulation of signal transduction	BE014011	125574 MARC 1PIG Sus scrofa cDNA 5', mRNA sequence						0.387019	0.978602	0.333897
GO:0006643	membrane lipid metabolic process	BE235135	142484 MARC 1PIG Sus scrofa cDNA 5', mRNA sequence						0.387019	0.978602	0.333897
GO:0006333	chromatin assembly or disassembly	CK452762	908422 MARC 4PIG Sus scrofa cDNA 5', mRNA sequence						0.391677	0.978851	2.44858
GO:0006333	chromatin assembly or disassembly	BX918412	BX918412 Sus Scrofa library (scan) Sus scrofa cDNA clone scan0038.i.09 5prim, mRNA sequence						0.391677	0.978851	2.44858
GO:0010629	negative regulation of gene expression	CK467405	938702 MARC 4PIG Sus scrofa cDNA 5', mRNA sequence						0.39402	0.978975	0.547022
GO:0010629	negative regulation of gene expression	CK467896	939242 MARC 4PIG Sus scrofa cDNA 5', mRNA sequence						0.39402	0.978975	0.547022
GO:0010629	negative regulation of gene expression	EW421594	rnca11b_e13.y1 nca Sus scrofa cDNA 5', mRNA sequence						0.39402	0.978975	0.547022
GO:0051128	regulation of cellular component organization	AK239756.1	Sus scrofa mRNA, clone:THY010202F01, expressed in thymus		BC004465.1	54386	TERF2IP	telomeric repeat binding factor 2, interacting protein	0.39727	0.979143	0.471744
GO:0051128	regulation of cellular component organization	DN120593	1120622 MARC 4PIG Sus scrofa cDNA 5', mRNA sequence						0.39727	0.979143	0.471744
GO:0051234	establishment of localization	AK234277.1	Sus scrofa mRNA, clone:OVR010036G03, expressed in ovary		NM_213636.1	9260	PDLIM7	PDZ and LIM domain 7 (enigma)	0.401494	0.979358	0.858685
GO:0051234	establishment of localization	AK234386.1	Sus scrofa mRNA, clone:OVR010051H11, expressed in ovary		NM_145169.1	113402	SFT2D1	SFT2 domain containing 1	0.401494	0.979358	0.858685
GO:0051234	establishment of localization	AK231172.1	Sus scrofa mRNA, clone:ITT010006G12, expressed in intestine		BC002595.2	4713	NDUFB7	NADH dehydrogenase (ubiquinone) 1 beta subcomplex, 7, 18kDa	0.401494	0.979358	0.858685
GO:0051234	establishment of localization	AK231733.1	Sus scrofa mRNA, clone:LNG010017B08, expressed in lung		BC003417.1	4705	NDUFA10	NADH dehydrogenase (ubiquinone) 1 alpha subcomplex, 10, 42kDa	0.401494	0.979358	0.858685
GO:0051234	establishment of localization	AK232136.1	Sus scrofa mRNA, clone:LNG010086D03, expressed in lung		AK057903.1	1318	SLC31A2	solute carrier family 31 (copper transporters), member 2	0.401494	0.979358	0.858685
GO:0051234	establishment of localization	AK230559.1	Sus scrofa mRNA, clone:AMP010010A02, expressed in alveolar macrophage	----	BC064357.1	8301	PICALM	phosphatidylinositol binding clathrin assembly protein	0.401494	0.979358	0.858685
GO:0051234	establishment of localization	AK233000.1	Sus scrofa mRNA, clone:LVRM10065H01, expressed in liver		BC028234.1	8775	NAPA	N-ethylmaleimide-sensitive factor attachment protein, alpha	0.401494	0.979358	0.858685
GO:0051234	establishment of localization	AK236601.1	Sus scrofa mRNA, clone:OVRM10207C01, expressed in ovary		AK292102.1	11015	KDELR3	KDEL (Lys-Asp-Glu-Leu) endoplasmic reticulum protein retention receptor 3	0.401494	0.979358	0.858685
GO:0051234	establishment of localization	AK236617.1	Sus scrofa mRNA, clone:OVRM10208F03, expressed in ovary		NM_203504.2	9908	G3BP2	GTPase activating protein (SH3 domain) binding protein 2	0.401494	0.979358	0.858685
GO:0051234	establishment of localization	AK236637.1	Sus scrofa mRNA, clone:OVRM10210C08, expressed in ovary		AK301837.1	25828	TXN2	thioredoxin 2	0.401494	0.979358	0.858685
GO:0051234	establishment of localization	AY609666.1	Sus scrofa clone Clu_24219.scr.msk.p1.Contig4, mRNA sequence		NM_016041.3	51009	DERL2	Der1-like domain family, member 2	0.401494	0.979358	0.858685
GO:0051234	establishment of localization	AY609726.1	Sus scrofa clone Clu_27891.scr.msk.p1.Contig1, mRNA sequence		NM_001663.3	382	ARF6	ADP-ribosylation factor 6	0.401494	0.979358	0.858685
GO:0051234	establishment of localization	BX666658	BX666658 Sus Scrofa library (scac) Sus scrofa cDNA clone scac0025.d.07 3prim, mRNA sequence						0.401494	0.979358	0.858685
GO:0051234	establishment of localization	BX667682	BX667682 Sus Scrofa library (scac) Sus scrofa cDNA clone scac0026.g.10 5prim, mRNA sequence						0.401494	0.979358	0.858685
GO:0051234	establishment of localization	BP142174	BP142174 full-length enriched swine cDNA library, adult ovary Sus scrofa cDNA clone OVR010014C02 5', mRNA sequence						0.401494	0.979358	0.858685
GO:0051234	establishment of localization	CK454638	915131 MARC 4PIG Sus scrofa cDNA 5', mRNA sequence						0.401494	0.979358	0.858685
GO:0051234	establishment of localization	CK454645	915140 MARC 4PIG Sus scrofa cDNA 5', mRNA sequence						0.401494	0.979358	0.858685
GO:0051234	establishment of localization	CK460216	930472 MARC 4PIG Sus scrofa cDNA 5', mRNA sequence						0.401494	0.979358	0.858685
GO:0051234	establishment of localization	BX925993	BX925993 Sus Scrofa library (scan) Sus scrofa cDNA clone scan0021.f.19 5prim, mRNA sequence						0.401494	0.979358	0.858685
GO:0051234	establishment of localization	CN157675	946398 MARC 4PIG Sus scrofa cDNA 5', mRNA sequence						0.401494	0.979358	0.858685
GO:0051234	establishment of localization	CJ011598	CJ011598 full-length enriched swine cDNA library, adult mesenteric lymph node Sus scrofa cDNA clone MLN01C070051 5', mRNA sequence						0.401494	0.979358	0.858685
GO:0051234	establishment of localization	DN104456	1100249 MARC 4PIG Sus scrofa cDNA 5', mRNA sequence						0.401494	0.979358	0.858685
GO:0051234	establishment of localization	DN111105	1110192 MARC 4PIG Sus scrofa cDNA 5', mRNA sequence						0.401494	0.979358	0.858685
GO:0051234	establishment of localization	DR120938	COG3c1 Pig pBluescript and pTrueBlue library Sus scrofa cDNA 5', mRNA sequence						0.401494	0.979358	0.858685
GO:0051234	establishment of localization	AK234908	Sus scrofa mRNA, clone:OVRM10028H08, expressed in ovary	LOC595127	AB097051.1	10550	ARL6IP5	ADP-ribosylation-like factor 6 interacting protein 5	0.401494	0.979358	0.858685
GO:0051234	establishment of localization	EV889890	rcad24b_f12.y1 cag Sus scrofa cDNA 5', mRNA sequence						0.401494	0.979358	0.858685
GO:0051234	establishment of localization	EH412738	TL505101 Sus LongSAGE/GLGI Express Library Sus scrofa cDNA, mRNA sequence						0.401494	0.979358	0.858685
GO:0051234	establishment of localization	EV984595	rcmu37_l22.y1 cmu Sus scrofa cDNA 5', mRNA sequence						0.401494	0.979358	0.858685
GO:0051234	establishment of localization	EW115068	reje08b_c22.y1 eje Sus scrofa cDNA 5', mRNA sequence						0.401494	0.979358	0.858685
GO:0051234	establishment of localization	EW137538	reru09c_h4.y1 eru Sus scrofa cDNA 5', mRNA sequence						0.401494	0.979358	0.858685
GO:0051234	establishment of localization	EW177532	rfcc24b_f2.y1 fcc Sus scrofa cDNA 5', mRNA sequence						0.401494	0.979358	0.858685
GO:0051234	establishment of localization	EW245573	rhlv30b_n22.y1 hlv Sus scrofa cDNA 5', mRNA sequence						0.401494	0.979358	0.858685
GO:0051234	establishment of localization	EW367525	rmas918b_h23.y1 mas Sus scrofa cDNA 5', mRNA sequence						0.401494	0.979358	0.858685
GO:0051234	establishment of localization	EW407282	rmgp039_f21.y1 mgp Sus scrofa cDNA 5', mRNA sequence						0.401494	0.979358	0.858685
GO:0016310	phosphorylation	AK238982.1	Sus scrofa mRNA, clone:THY010053D09, expressed in thymus		DQ896646.2	65018	PINK1	PTEN induced putative kinase 1	0.402725	0.97942	0.667793
GO:0016310	phosphorylation	AK236182.1	Sus scrofa mRNA, clone:OVRM10161E01, expressed in ovary		NM_005006.5	4719	NDUFS1	NADH dehydrogenase (ubiquinone) Fe-S protein 1, 75kDa (NADH-coenzyme Q reductase)	0.402725	0.97942	0.667793
GO:0016310	phosphorylation	AK236752.1	Sus scrofa mRNA, clone:OVRM10224E06, expressed in ovary		NM_005003.2	4706	NDUFAB1	NADH dehydrogenase (ubiquinone) 1, alpha/beta subcomplex, 1, 8kDa	0.402725	0.97942	0.667793
GO:0016310	phosphorylation	CV876956	PDUts1158D11 Porcine testis cDNA library I Sus scrofa cDNA clone PDUts1158D11 5' similar to homologue to ref|NM_013233.1| Homo sapiens serine threonine kinase 39 (STE20/SPS1 homolog, yeast) (STK39), mRNA, mRNA sequence						0.402725	0.97942	0.667793
GO:0016310	phosphorylation	DB788903	DB788903 full-length enriched swine cDNA library, adult adrenal gland Sus scrofa cDNA clone ADR010083F11 5', mRNA sequence						0.402725	0.97942	0.667793
GO:0016310	phosphorylation	BE235135	142484 MARC 1PIG Sus scrofa cDNA 5', mRNA sequence						0.402725	0.97942	0.667793
GO:0007389	pattern specification process	AK235345.1	Sus scrofa mRNA, clone:OVRM10071B07, expressed in ovary		NM_004529.2	4300	MLLT3	myeloid/lymphoid or mixed-lineage leukemia (trithorax homolog, Drosophila); translocated to, 3	0.409149	0.979736	1.714
GO:0007389	pattern specification process	BP158662	BP158662 full-length enriched swine cDNA library, adult spleen Sus scrofa cDNA clone SPL010018F11 5', mRNA sequence						0.409149	0.979736	1.714
GO:0007389	pattern specification process	BX923538	BX923538 Sus Scrofa library (scan) Sus scrofa cDNA clone scan0014.h.08 5prim, mRNA sequence						0.409149	0.979736	1.714
GO:0007389	pattern specification process	EW417768	rnbm12b_c21.y1 nbm Sus scrofa cDNA 5', mRNA sequence						0.409149	0.979736	1.714
GO:0006809	nitric oxide biosynthetic process	AK235171.1	Sus scrofa mRNA, clone:OVRM10055D04, expressed in ovary		AF087894.1	23564	DDAH2	dimethylarginine dimethylaminohydrolase 2	0.423687	0.980418	4.28501
GO:0046209	nitric oxide metabolic process	AK235171.1	Sus scrofa mRNA, clone:OVRM10055D04, expressed in ovary		AF087894.1	23564	DDAH2	dimethylarginine dimethylaminohydrolase 2	0.423687	0.980418	4.28501
GO:0007263	nitric oxide mediated signal transduction	AK235171.1	Sus scrofa mRNA, clone:OVRM10055D04, expressed in ovary		AF087894.1	23564	DDAH2	dimethylarginine dimethylaminohydrolase 2	0.423687	0.980418	4.28501
GO:0009262	deoxyribonucleotide metabolic process	AK236416.1	Sus scrofa mRNA, clone:OVRM10189H07, expressed in ovary		NM_001071.2	7298	TYMS	thymidylate synthetase	0.423687	0.980418	4.28501
GO:0033044	regulation of chromosome organization	AK239756.1	Sus scrofa mRNA, clone:THY010202F01, expressed in thymus		BC004465.1	54386	TERF2IP	telomeric repeat binding factor 2, interacting protein	0.423687	0.980418	4.28501
GO:0006515	misfolded or incompletely synthesized protein catabolic process	AY609666.1	Sus scrofa clone Clu_24219.scr.msk.p1.Contig4, mRNA sequence		NM_016041.3	51009	DERL2	Der1-like domain family, member 2	0.423687	0.980418	4.28501
GO:0030433	ER-associated protein catabolic process	AY609666.1	Sus scrofa clone Clu_24219.scr.msk.p1.Contig4, mRNA sequence		NM_016041.3	51009	DERL2	Der1-like domain family, member 2	0.423687	0.980418	4.28501
GO:0006984	ER-nuclear signaling pathway	AY609666.1	Sus scrofa clone Clu_24219.scr.msk.p1.Contig4, mRNA sequence		NM_016041.3	51009	DERL2	Der1-like domain family, member 2	0.423687	0.980418	4.28501
GO:0019933	cAMP-mediated signaling	AY610394.1	Sus scrofa clone reru31c_i7.y1.abd, mRNA sequence		NM_002495.2	4724	NDUFS4	NADH dehydrogenase (ubiquinone) Fe-S protein 4, 18kDa (NADH-coenzyme Q reductase)	0.423687	0.980418	4.28501
GO:0051705	behavioral interaction between organisms	BX665103	BX665103 Sus Scrofa library (scag) Sus scrofa cDNA clone scag0004.c.03 5prim, mRNA sequence						0.423687	0.980418	4.28501
GO:0007631	feeding behavior	BX665103	BX665103 Sus Scrofa library (scag) Sus scrofa cDNA clone scag0004.c.03 5prim, mRNA sequence						0.423687	0.980418	4.28501
GO:0007173	epidermal growth factor receptor signaling pathway	CN157951	946698 MARC 4PIG Sus scrofa cDNA 5', mRNA sequence						0.423687	0.980418	4.28501
GO:0016447	somatic recombination of immunoglobulin gene segments	CN164178	994302 MARC 4PIG Sus scrofa cDNA 5', mRNA sequence						0.423687	0.980418	4.28501
GO:0002562	somatic diversification of immune receptors via germline recombination within a single locus	CN164178	994302 MARC 4PIG Sus scrofa cDNA 5', mRNA sequence						0.423687	0.980418	4.28501
GO:0016444	somatic cell DNA recombination	CN164178	994302 MARC 4PIG Sus scrofa cDNA 5', mRNA sequence						0.423687	0.980418	4.28501
GO:0002200	somatic diversification of immune receptors	CN164178	994302 MARC 4PIG Sus scrofa cDNA 5', mRNA sequence						0.423687	0.980418	4.28501
GO:0016445	somatic diversification of immunoglobulins	CN164178	994302 MARC 4PIG Sus scrofa cDNA 5', mRNA sequence						0.423687	0.980418	4.28501
GO:0016481	negative regulation of transcription	CK467405	938702 MARC 4PIG Sus scrofa cDNA 5', mRNA sequence						0.43078	0.980734	0.562994
GO:0016481	negative regulation of transcription	CK467896	939242 MARC 4PIG Sus scrofa cDNA 5', mRNA sequence						0.43078	0.980734	0.562994
GO:0016481	negative regulation of transcription	EW421594	rnca11b_e13.y1 nca Sus scrofa cDNA 5', mRNA sequence						0.43078	0.980734	0.562994
GO:0050896	response to stimulus	AK234461.1	Sus scrofa mRNA, clone:OVR010067A09, expressed in ovary		NM_006107.3	51747	LUC7L3	LUC7-like 3 (S. cerevisiae)	0.43207	0.980791	0.84862
GO:0050896	response to stimulus	AK234533.1	Sus scrofa mRNA, clone:OVR010076H11, expressed in ovary		AK292829.1	23190	UBXN4	UBX domain protein 4	0.43207	0.980791	0.84862
GO:0050896	response to stimulus	AK234932.1	Sus scrofa mRNA, clone:OVRM10033G12, expressed in ovary		AK311348.1	2189	FANCG	Fanconi anemia, complementation group G	0.43207	0.980791	0.84862
GO:0050896	response to stimulus	AK232205.1	Sus scrofa mRNA, clone:LNG010103E07, expressed in lung		AK095911.1	27129	HSPB7	heat shock 27kDa protein family, member 7 (cardiovascular)	0.43207	0.980791	0.84862
GO:0050896	response to stimulus	AK232277.1	Sus scrofa mRNA, clone:LVR010010H09, expressed in liver		AB096250.1	3316	HSPB2	heat shock 27kDa protein 2	0.43207	0.980791	0.84862
GO:0050896	response to stimulus	AK235604.1	Sus scrofa mRNA, clone:OVRM10097B08, expressed in ovary		NM_001048251.1	123920	CMTM3	CKLF-like MARVEL transmembrane domain containing 3	0.43207	0.980791	0.84862
GO:0050896	response to stimulus	AK232555.1	Sus scrofa mRNA, clone:LVR010073A12, expressed in liver		NM_004208.2	9131	AIFM1	apoptosis-inducing factor, mitochondrion-associated, 1	0.43207	0.980791	0.84862
GO:0050896	response to stimulus	AK236127.1	Sus scrofa mRNA, clone:OVRM10155A01, expressed in ovary		NM_001135654.1	8761	PABPC4	poly(A) binding protein, cytoplasmic 4 (inducible form)	0.43207	0.980791	0.84862
GO:0050896	response to stimulus	AK238982.1	Sus scrofa mRNA, clone:THY010053D09, expressed in thymus		DQ896646.2	65018	PINK1	PTEN induced putative kinase 1	0.43207	0.980791	0.84862
GO:0050896	response to stimulus	AK236404.1	Sus scrofa mRNA, clone:OVRM10189A09, expressed in ovary		AK297127.1	11100	HNRNPUL1	heterogeneous nuclear ribonucleoprotein U-like 1	0.43207	0.980791	0.84862
GO:0050896	response to stimulus	AK236416.1	Sus scrofa mRNA, clone:OVRM10189H07, expressed in ovary		NM_001071.2	7298	TYMS	thymidylate synthetase	0.43207	0.980791	0.84862
GO:0050896	response to stimulus	AK239906.1	Sus scrofa mRNA, clone:UTR010010A12, expressed in uterus		NM_001540.3	3315	HSPB1	heat shock 27kDa protein 1	0.43207	0.980791	0.84862
GO:0050896	response to stimulus	AK233231.1	Sus scrofa mRNA, clone:LVRM10107H06, expressed in liver		NM_002496.2	4728	NDUFS8	NADH dehydrogenase (ubiquinone) Fe-S protein 8, 23kDa (NADH-coenzyme Q reductase)	0.43207	0.980791	0.84862
GO:0050896	response to stimulus	AK240181.1	Sus scrofa mRNA, clone:UTR010038F11, expressed in uterus		NM_032514.2	84557	MAP1LC3A	microtubule-associated protein 1 light chain 3 alpha	0.43207	0.980791	0.84862
GO:0050896	response to stimulus	AY609666.1	Sus scrofa clone Clu_24219.scr.msk.p1.Contig4, mRNA sequence		NM_016041.3	51009	DERL2	Der1-like domain family, member 2	0.43207	0.980791	0.84862
GO:0050896	response to stimulus	AY609977.1	Sus scrofa clone Clu_51220.scr.msk.p1.Contig1, mRNA sequence		BC132869.1	8988	HSPB3	heat shock 27kDa protein 3	0.43207	0.980791	0.84862
GO:0050896	response to stimulus	AY610185.1	Sus scrofa clone Clu_89764.scr.msk.p1.Contig2, mRNA sequence		NM_016126.2	51668	HSPB11	heat shock protein family B (small), member 11	0.43207	0.980791	0.84862
GO:0050896	response to stimulus	AY610394.1	Sus scrofa clone reru31c_i7.y1.abd, mRNA sequence		NM_002495.2	4724	NDUFS4	NADH dehydrogenase (ubiquinone) Fe-S protein 4, 18kDa (NADH-coenzyme Q reductase)	0.43207	0.980791	0.84862
GO:0050896	response to stimulus	BX664880	BX664880 Sus Scrofa library (scag) Sus scrofa cDNA clone scag0005.d.07 5prim, mRNA sequence						0.43207	0.980791	0.84862
GO:0050896	response to stimulus	BX665103	BX665103 Sus Scrofa library (scag) Sus scrofa cDNA clone scag0004.c.03 5prim, mRNA sequence						0.43207	0.980791	0.84862
GO:0050896	response to stimulus	BP158662	BP158662 full-length enriched swine cDNA library, adult spleen Sus scrofa cDNA clone SPL010018F11 5', mRNA sequence						0.43207	0.980791	0.84862
GO:0050896	response to stimulus	CN164178	994302 MARC 4PIG Sus scrofa cDNA 5', mRNA sequence						0.43207	0.980791	0.84862
GO:0050896	response to stimulus	DN100920	1000314 MARC 4PIG Sus scrofa cDNA 5', mRNA sequence						0.43207	0.980791	0.84862
GO:0050896	response to stimulus	AJ950507	AJ950507 KN404_1 Sus scrofa cDNA clone C0007741i12 5', mRNA sequence						0.43207	0.980791	0.84862
GO:0050896	response to stimulus	CV876956	PDUts1158D11 Porcine testis cDNA library I Sus scrofa cDNA clone PDUts1158D11 5' similar to homologue to ref|NM_013233.1| Homo sapiens serine threonine kinase 39 (STE20/SPS1 homolog, yeast) (STK39), mRNA, mRNA sequence						0.43207	0.980791	0.84862
GO:0050896	response to stimulus	EW093873	recc2810c_d10.y1 ecc Sus scrofa cDNA 5', mRNA sequence						0.43207	0.980791	0.84862
GO:0050896	response to stimulus	EW464984	rnmm24c_m17.y1 nmm Sus scrofa cDNA 5', mRNA sequence						0.43207	0.980791	0.84862
GO:0019725	cellular homeostasis	AK236182.1	Sus scrofa mRNA, clone:OVRM10161E01, expressed in ovary		NM_005006.5	4719	NDUFS1	NADH dehydrogenase (ubiquinone) Fe-S protein 1, 75kDa (NADH-coenzyme Q reductase)	0.435896	0.980956	0.352192
GO:0007276	gamete generation	CX057037	PDUts2009C04 Porcine testis cDNA library II Sus scrofa cDNA clone PDUts2009C04 5' similar to homologue to ref|NM_017826.1| Homo sapiens hypothetical protein FLJ20449 (FLJ20449), mRNA, mRNA sequence						0.435896	0.980956	0.352192
GO:0009653	anatomical structure morphogenesis	AF329358.1	Sus scrofa laminin beta-1 chain mRNA, partial cds	LAMB1	NM_002291.2	3912	LAMB1	laminin, beta 1	0.441847	0.981208	0.724227
GO:0009653	anatomical structure morphogenesis	BP158662	BP158662 full-length enriched swine cDNA library, adult spleen Sus scrofa cDNA clone SPL010018F11 5', mRNA sequence						0.441847	0.981208	0.724227
GO:0009653	anatomical structure morphogenesis	BX923548	BX923548 Sus Scrofa library (scan) Sus scrofa cDNA clone scan0012.k.22 5prim, mRNA sequence						0.441847	0.981208	0.724227
GO:0009653	anatomical structure morphogenesis	DN120593	1120622 MARC 4PIG Sus scrofa cDNA 5', mRNA sequence						0.441847	0.981208	0.724227
GO:0009653	anatomical structure morphogenesis	DV904076	POSM0605028_M02R porcine skeletal muscle cDNA library (PoSM) Sus scrofa cDNA 3', mRNA sequence						0.441847	0.981208	0.724227
GO:0009653	anatomical structure morphogenesis	EW088403	recc2833c_i12.y1 ecc Sus scrofa cDNA 5', mRNA sequence						0.441847	0.981208	0.724227
GO:0009653	anatomical structure morphogenesis	EW228094	rgul0125_o12.y1 gul Sus scrofa cDNA 5', mRNA sequence						0.441847	0.981208	0.724227
GO:0009653	anatomical structure morphogenesis	EW417768	rnbm12b_c21.y1 nbm Sus scrofa cDNA 5', mRNA sequence						0.441847	0.981208	0.724227
GO:0050793	regulation of developmental process	AK235171.1	Sus scrofa mRNA, clone:OVRM10055D04, expressed in ovary		AF087894.1	23564	DDAH2	dimethylarginine dimethylaminohydrolase 2	0.445085	0.981342	0.75396
GO:0050793	regulation of developmental process	AK235751.1	Sus scrofa mRNA, clone:OVRM10111E07, expressed in ovary		NM_004323.4	573	BAG1	BCL2-associated athanogene	0.445085	0.981342	0.75396
GO:0050793	regulation of developmental process	AK232555.1	Sus scrofa mRNA, clone:LVR010073A12, expressed in liver		NM_004208.2	9131	AIFM1	apoptosis-inducing factor, mitochondrion-associated, 1	0.445085	0.981342	0.75396
GO:0050793	regulation of developmental process	CK467405	938702 MARC 4PIG Sus scrofa cDNA 5', mRNA sequence						0.445085	0.981342	0.75396
GO:0050793	regulation of developmental process	BX915041	BX915041 Sus Scrofa library (scan) Sus scrofa cDNA clone scan0027.c.13 5prim, mRNA sequence						0.445085	0.981342	0.75396
GO:0050793	regulation of developmental process	CN158607	947410 MARC 4PIG Sus scrofa cDNA 5', mRNA sequence						0.445085	0.981342	0.75396
GO:0050793	regulation of developmental process	DN120593	1120622 MARC 4PIG Sus scrofa cDNA 5', mRNA sequence						0.445085	0.981342	0.75396
GO:0050793	regulation of developmental process	DN123606	1123919 MARC 4PIG Sus scrofa cDNA 5', mRNA sequence						0.445085	0.981342	0.75396
GO:0050793	regulation of developmental process	EW421594	rnca11b_e13.y1 nca Sus scrofa cDNA 5', mRNA sequence						0.445085	0.981342	0.75396
GO:0050793	regulation of developmental process	BE235135	142484 MARC 1PIG Sus scrofa cDNA 5', mRNA sequence						0.445085	0.981342	0.75396
GO:0016265	death	AK234461.1	Sus scrofa mRNA, clone:OVR010067A09, expressed in ovary		NM_006107.3	51747	LUC7L3	LUC7-like 3 (S. cerevisiae)	0.445391	0.981354	1.35316
GO:0008219	cell death	AK234461.1	Sus scrofa mRNA, clone:OVR010067A09, expressed in ovary		NM_006107.3	51747	LUC7L3	LUC7-like 3 (S. cerevisiae)	0.445391	0.981354	1.35316
GO:0016265	death	AK235603.1	Sus scrofa mRNA, clone:OVRM10097A03, expressed in ovary		NM_003374.1	7416	VDAC1	voltage-dependent anion channel 1	0.445391	0.981354	1.35316
GO:0008219	cell death	AK235603.1	Sus scrofa mRNA, clone:OVRM10097A03, expressed in ovary		NM_003374.1	7416	VDAC1	voltage-dependent anion channel 1	0.445391	0.981354	1.35316
GO:0016265	death	AK232555.1	Sus scrofa mRNA, clone:LVR010073A12, expressed in liver		NM_004208.2	9131	AIFM1	apoptosis-inducing factor, mitochondrion-associated, 1	0.445391	0.981354	1.35316
GO:0008219	cell death	AK232555.1	Sus scrofa mRNA, clone:LVR010073A12, expressed in liver		NM_004208.2	9131	AIFM1	apoptosis-inducing factor, mitochondrion-associated, 1	0.445391	0.981354	1.35316
GO:0008219	cell death	AK236182.1	Sus scrofa mRNA, clone:OVRM10161E01, expressed in ovary		NM_005006.5	4719	NDUFS1	NADH dehydrogenase (ubiquinone) Fe-S protein 1, 75kDa (NADH-coenzyme Q reductase)	0.445391	0.981354	1.35316
GO:0016265	death	AK236182.1	Sus scrofa mRNA, clone:OVRM10161E01, expressed in ovary		NM_005006.5	4719	NDUFS1	NADH dehydrogenase (ubiquinone) Fe-S protein 1, 75kDa (NADH-coenzyme Q reductase)	0.445391	0.981354	1.35316
GO:0008219	cell death	AK239887.1	Sus scrofa mRNA, clone:UTR010007G10, expressed in uterus		DQ896345.2	5134	PDCD2	programmed cell death 2	0.445391	0.981354	1.35316
GO:0016265	death	AK239887.1	Sus scrofa mRNA, clone:UTR010007G10, expressed in uterus		DQ896345.2	5134	PDCD2	programmed cell death 2	0.445391	0.981354	1.35316
GO:0016265	death	AY610295.1	Sus scrofa clone rcsk04_o4.y1.abd, mRNA sequence		BC015519.2	9141	PDCD5	programmed cell death 5	0.445391	0.981354	1.35316
GO:0008219	cell death	AY610295.1	Sus scrofa clone rcsk04_o4.y1.abd, mRNA sequence		BC015519.2	9141	PDCD5	programmed cell death 5	0.445391	0.981354	1.35316
GO:0016265	death	BX924637	BX924637 Sus Scrofa library (scan) Sus scrofa cDNA clone scan0017.d.21 5prim, mRNA sequence						0.445391	0.981354	1.35316
GO:0008219	cell death	BX924637	BX924637 Sus Scrofa library (scan) Sus scrofa cDNA clone scan0017.d.21 5prim, mRNA sequence						0.445391	0.981354	1.35316
GO:0016265	death	DN124736	1138534 MARC 4PIG Sus scrofa cDNA 5', mRNA sequence						0.445391	0.981354	1.35316
GO:0008219	cell death	DN124736	1138534 MARC 4PIG Sus scrofa cDNA 5', mRNA sequence						0.445391	0.981354	1.35316
GO:0008219	cell death	EW421594	rnca11b_e13.y1 nca Sus scrofa cDNA 5', mRNA sequence						0.445391	0.981354	1.35316
GO:0016265	death	EW421594	rnca11b_e13.y1 nca Sus scrofa cDNA 5', mRNA sequence						0.445391	0.981354	1.35316
GO:0006810	transport	AK234277.1	Sus scrofa mRNA, clone:OVR010036G03, expressed in ovary		NM_213636.1	9260	PDLIM7	PDZ and LIM domain 7 (enigma)	0.449333	0.981515	0.869793
GO:0006810	transport	AK234386.1	Sus scrofa mRNA, clone:OVR010051H11, expressed in ovary		NM_145169.1	113402	SFT2D1	SFT2 domain containing 1	0.449333	0.981515	0.869793
GO:0006810	transport	AK231172.1	Sus scrofa mRNA, clone:ITT010006G12, expressed in intestine		BC002595.2	4713	NDUFB7	NADH dehydrogenase (ubiquinone) 1 beta subcomplex, 7, 18kDa	0.449333	0.981515	0.869793
GO:0006810	transport	AK231733.1	Sus scrofa mRNA, clone:LNG010017B08, expressed in lung		BC003417.1	4705	NDUFA10	NADH dehydrogenase (ubiquinone) 1 alpha subcomplex, 10, 42kDa	0.449333	0.981515	0.869793
GO:0006810	transport	AK232136.1	Sus scrofa mRNA, clone:LNG010086D03, expressed in lung		AK057903.1	1318	SLC31A2	solute carrier family 31 (copper transporters), member 2	0.449333	0.981515	0.869793
GO:0006810	transport	AK230559.1	Sus scrofa mRNA, clone:AMP010010A02, expressed in alveolar macrophage	----	BC064357.1	8301	PICALM	phosphatidylinositol binding clathrin assembly protein	0.449333	0.981515	0.869793
GO:0006810	transport	AK233000.1	Sus scrofa mRNA, clone:LVRM10065H01, expressed in liver		BC028234.1	8775	NAPA	N-ethylmaleimide-sensitive factor attachment protein, alpha	0.449333	0.981515	0.869793
GO:0006810	transport	AK236601.1	Sus scrofa mRNA, clone:OVRM10207C01, expressed in ovary		AK292102.1	11015	KDELR3	KDEL (Lys-Asp-Glu-Leu) endoplasmic reticulum protein retention receptor 3	0.449333	0.981515	0.869793
GO:0006810	transport	AK236617.1	Sus scrofa mRNA, clone:OVRM10208F03, expressed in ovary		NM_203504.2	9908	G3BP2	GTPase activating protein (SH3 domain) binding protein 2	0.449333	0.981515	0.869793
GO:0006810	transport	AK236637.1	Sus scrofa mRNA, clone:OVRM10210C08, expressed in ovary		AK301837.1	25828	TXN2	thioredoxin 2	0.449333	0.981515	0.869793
GO:0006810	transport	AY609666.1	Sus scrofa clone Clu_24219.scr.msk.p1.Contig4, mRNA sequence		NM_016041.3	51009	DERL2	Der1-like domain family, member 2	0.449333	0.981515	0.869793
GO:0006810	transport	AY609726.1	Sus scrofa clone Clu_27891.scr.msk.p1.Contig1, mRNA sequence		NM_001663.3	382	ARF6	ADP-ribosylation factor 6	0.449333	0.981515	0.869793
GO:0006810	transport	BX666658	BX666658 Sus Scrofa library (scac) Sus scrofa cDNA clone scac0025.d.07 3prim, mRNA sequence						0.449333	0.981515	0.869793
GO:0006810	transport	BX667682	BX667682 Sus Scrofa library (scac) Sus scrofa cDNA clone scac0026.g.10 5prim, mRNA sequence						0.449333	0.981515	0.869793
GO:0006810	transport	BP142174	BP142174 full-length enriched swine cDNA library, adult ovary Sus scrofa cDNA clone OVR010014C02 5', mRNA sequence						0.449333	0.981515	0.869793
GO:0006810	transport	CK454638	915131 MARC 4PIG Sus scrofa cDNA 5', mRNA sequence						0.449333	0.981515	0.869793
GO:0006810	transport	CK454645	915140 MARC 4PIG Sus scrofa cDNA 5', mRNA sequence						0.449333	0.981515	0.869793
GO:0006810	transport	CK460216	930472 MARC 4PIG Sus scrofa cDNA 5', mRNA sequence						0.449333	0.981515	0.869793
GO:0006810	transport	BX925993	BX925993 Sus Scrofa library (scan) Sus scrofa cDNA clone scan0021.f.19 5prim, mRNA sequence						0.449333	0.981515	0.869793
GO:0006810	transport	CN157675	946398 MARC 4PIG Sus scrofa cDNA 5', mRNA sequence						0.449333	0.981515	0.869793
GO:0006810	transport	CJ011598	CJ011598 full-length enriched swine cDNA library, adult mesenteric lymph node Sus scrofa cDNA clone MLN01C070051 5', mRNA sequence						0.449333	0.981515	0.869793
GO:0006810	transport	DN104456	1100249 MARC 4PIG Sus scrofa cDNA 5', mRNA sequence						0.449333	0.981515	0.869793
GO:0006810	transport	DN111105	1110192 MARC 4PIG Sus scrofa cDNA 5', mRNA sequence						0.449333	0.981515	0.869793
GO:0006810	transport	DR120938	COG3c1 Pig pBluescript and pTrueBlue library Sus scrofa cDNA 5', mRNA sequence						0.449333	0.981515	0.869793
GO:0006810	transport	AK234908	Sus scrofa mRNA, clone:OVRM10028H08, expressed in ovary	LOC595127	AB097051.1	10550	ARL6IP5	ADP-ribosylation-like factor 6 interacting protein 5	0.449333	0.981515	0.869793
GO:0006810	transport	EV889890	rcad24b_f12.y1 cag Sus scrofa cDNA 5', mRNA sequence						0.449333	0.981515	0.869793
GO:0006810	transport	EH412738	TL505101 Sus LongSAGE/GLGI Express Library Sus scrofa cDNA, mRNA sequence						0.449333	0.981515	0.869793
GO:0006810	transport	EV984595	rcmu37_l22.y1 cmu Sus scrofa cDNA 5', mRNA sequence						0.449333	0.981515	0.869793
GO:0006810	transport	EW115068	reje08b_c22.y1 eje Sus scrofa cDNA 5', mRNA sequence						0.449333	0.981515	0.869793
GO:0006810	transport	EW137538	reru09c_h4.y1 eru Sus scrofa cDNA 5', mRNA sequence						0.449333	0.981515	0.869793
GO:0006810	transport	EW177532	rfcc24b_f2.y1 fcc Sus scrofa cDNA 5', mRNA sequence						0.449333	0.981515	0.869793
GO:0006810	transport	EW245573	rhlv30b_n22.y1 hlv Sus scrofa cDNA 5', mRNA sequence						0.449333	0.981515	0.869793
GO:0006810	transport	EW367525	rmas918b_h23.y1 mas Sus scrofa cDNA 5', mRNA sequence						0.449333	0.981515	0.869793
GO:0006810	transport	EW407282	rmgp039_f21.y1 mgp Sus scrofa cDNA 5', mRNA sequence						0.449333	0.981515	0.869793
GO:0030335	positive regulation of cell migration	AF329358.1	Sus scrofa laminin beta-1 chain mRNA, partial cds	LAMB1	NM_002291.2	3912	LAMB1	laminin, beta 1	0.449371	0.981516	2.23566
GO:0030335	positive regulation of cell migration	BX923548	BX923548 Sus Scrofa library (scan) Sus scrofa cDNA clone scan0012.k.22 5prim, mRNA sequence						0.449371	0.981516	2.23566
GO:0042592	homeostatic process	AK236182.1	Sus scrofa mRNA, clone:OVRM10161E01, expressed in ovary		NM_005006.5	4719	NDUFS1	NADH dehydrogenase (ubiquinone) Fe-S protein 1, 75kDa (NADH-coenzyme Q reductase)	0.450159	0.981548	0.571334
GO:0042592	homeostatic process	AK239756.1	Sus scrofa mRNA, clone:THY010202F01, expressed in thymus		BC004465.1	54386	TERF2IP	telomeric repeat binding factor 2, interacting protein	0.450159	0.981548	0.571334
GO:0042592	homeostatic process	EW357862	rlyg24_g14.y1 lyg Sus scrofa cDNA 5', mRNA sequence						0.450159	0.981548	0.571334
GO:0001501	skeletal system development	DN112655	1111858 MARC 4PIG Sus scrofa cDNA 3', mRNA sequence						0.462311	0.982025	0.362113
GO:0008104	protein localization	AK234386.1	Sus scrofa mRNA, clone:OVR010051H11, expressed in ovary		NM_145169.1	113402	SFT2D1	SFT2 domain containing 1	0.464319	0.982101	0.760652
GO:0008104	protein localization	AK233000.1	Sus scrofa mRNA, clone:LVRM10065H01, expressed in liver		BC028234.1	8775	NAPA	N-ethylmaleimide-sensitive factor attachment protein, alpha	0.464319	0.982101	0.760652
GO:0008104	protein localization	AK236601.1	Sus scrofa mRNA, clone:OVRM10207C01, expressed in ovary		AK292102.1	11015	KDELR3	KDEL (Lys-Asp-Glu-Leu) endoplasmic reticulum protein retention receptor 3	0.464319	0.982101	0.760652
GO:0008104	protein localization	AY609666.1	Sus scrofa clone Clu_24219.scr.msk.p1.Contig4, mRNA sequence		NM_016041.3	51009	DERL2	Der1-like domain family, member 2	0.464319	0.982101	0.760652
GO:0008104	protein localization	AY609726.1	Sus scrofa clone Clu_27891.scr.msk.p1.Contig1, mRNA sequence		NM_001663.3	382	ARF6	ADP-ribosylation factor 6	0.464319	0.982101	0.760652
GO:0008104	protein localization	BP158662	BP158662 full-length enriched swine cDNA library, adult spleen Sus scrofa cDNA clone SPL010018F11 5', mRNA sequence						0.464319	0.982101	0.760652
GO:0008104	protein localization	CK454638	915131 MARC 4PIG Sus scrofa cDNA 5', mRNA sequence						0.464319	0.982101	0.760652
GO:0008104	protein localization	DN104456	1100249 MARC 4PIG Sus scrofa cDNA 5', mRNA sequence						0.464319	0.982101	0.760652
GO:0008104	protein localization	DR120938	COG3c1 Pig pBluescript and pTrueBlue library Sus scrofa cDNA 5', mRNA sequence						0.464319	0.982101	0.760652
GO:0008104	protein localization	EV984595	rcmu37_l22.y1 cmu Sus scrofa cDNA 5', mRNA sequence						0.464319	0.982101	0.760652
GO:0003002	regionalization	AK235345.1	Sus scrofa mRNA, clone:OVRM10071B07, expressed in ovary		NM_004529.2	4300	MLLT3	myeloid/lymphoid or mixed-lineage leukemia (trithorax homolog, Drosophila); translocated to, 3	0.467354	0.982215	1.79372
GO:0003002	regionalization	BX923538	BX923538 Sus Scrofa library (scan) Sus scrofa cDNA clone scan0014.h.08 5prim, mRNA sequence						0.467354	0.982215	1.79372
GO:0003002	regionalization	EW417768	rnbm12b_c21.y1 nbm Sus scrofa cDNA 5', mRNA sequence						0.467354	0.982215	1.79372
GO:0051674	localization of cell	AK231683.1	Sus scrofa mRNA, clone:LNG010007F06, expressed in lung	ARPC1B	NM_005720.2	10095	ARPC1B	actin related protein 2/3 complex, subunit 1B, 41kDa	0.472958	0.982422	0.504119
GO:0051674	localization of cell	DT324183	SusFleck_BF_0033_0036_5_pCNS_D01 SusFleck Backfat Sus scrofa cDNA clone 0033_0036_D01 5', mRNA sequence						0.472958	0.982422	0.504119
GO:0001775	cell activation	CN164178	994302 MARC 4PIG Sus scrofa cDNA 5', mRNA sequence						0.476034	0.982534	0.367286
GO:0043094	cellular metabolic compound salvage	AK240417.1	Sus scrofa mRNA, clone:UTR010066E08, expressed in uterus		AB073609.1	55256	ADI1	acireductone dioxygenase 1	0.485014	0.982852	3.67286
GO:0006921	cell structure disassembly during apoptosis	AK232555.1	Sus scrofa mRNA, clone:LVR010073A12, expressed in liver		NM_004208.2	9131	AIFM1	apoptosis-inducing factor, mitochondrion-associated, 1	0.485014	0.982852	3.67286
GO:0006096	glycolysis	AK236324.1	Sus scrofa mRNA, clone:OVRM10181E04, expressed in ovary		BC000439.2	5162	PDHB	pyruvate dehydrogenase (lipoamide) beta	0.485014	0.982852	3.67286
GO:0009303	rRNA transcription	AK236398.1	Sus scrofa mRNA, clone:OVRM10188F03, expressed in ovary		AM746459.1	440400	RNASEK	ribonuclease, RNase K	0.485014	0.982852	3.67286
GO:0009124	nucleoside monophosphate biosynthetic process	AK236416.1	Sus scrofa mRNA, clone:OVRM10189H07, expressed in ovary		NM_001071.2	7298	TYMS	thymidylate synthetase	0.485014	0.982852	3.67286
GO:0016236	macroautophagy	AK240181.1	Sus scrofa mRNA, clone:UTR010038F11, expressed in uterus		NM_032514.2	84557	MAP1LC3A	microtubule-associated protein 1 light chain 3 alpha	0.485014	0.982852	3.67286
GO:0034976	response to endoplasmic reticulum stress	AY609666.1	Sus scrofa clone Clu_24219.scr.msk.p1.Contig4, mRNA sequence		NM_016041.3	51009	DERL2	Der1-like domain family, member 2	0.485014	0.982852	3.67286
GO:0043410	positive regulation of MAPKKK cascade	BE014011	125574 MARC 1PIG Sus scrofa cDNA 5', mRNA sequence						0.485014	0.982852	3.67286
GO:0030178	negative regulation of Wnt receptor signaling pathway	BE014011	125574 MARC 1PIG Sus scrofa cDNA 5', mRNA sequence						0.485014	0.982852	3.67286
GO:0051707	response to other organism	AK236404.1	Sus scrofa mRNA, clone:OVRM10189A09, expressed in ovary		AK297127.1	11100	HNRNPUL1	heterogeneous nuclear ribonucleoprotein U-like 1	0.490109	0.983027	0.372609
GO:0048583	regulation of response to stimulus	CK454638	915131 MARC 4PIG Sus scrofa cDNA 5', mRNA sequence						0.490109	0.983027	0.372609
GO:0007017	microtubule-based process	DN132970	996409 MARC 4PIG Sus scrofa cDNA 5', mRNA sequence						0.490109	0.983027	0.372609
GO:0043086	negative regulation of catalytic activity	EW407282	rmgp039_f21.y1 mgp Sus scrofa cDNA 5', mRNA sequence						0.490109	0.983027	0.372609
GO:0033036	macromolecule localization	AK234386.1	Sus scrofa mRNA, clone:OVR010051H11, expressed in ovary		NM_145169.1	113402	SFT2D1	SFT2 domain containing 1	0.498959	0.983323	0.783409
GO:0033036	macromolecule localization	AK233000.1	Sus scrofa mRNA, clone:LVRM10065H01, expressed in liver		BC028234.1	8775	NAPA	N-ethylmaleimide-sensitive factor attachment protein, alpha	0.498959	0.983323	0.783409
GO:0033036	macromolecule localization	AK236601.1	Sus scrofa mRNA, clone:OVRM10207C01, expressed in ovary		AK292102.1	11015	KDELR3	KDEL (Lys-Asp-Glu-Leu) endoplasmic reticulum protein retention receptor 3	0.498959	0.983323	0.783409
GO:0033036	macromolecule localization	AK236617.1	Sus scrofa mRNA, clone:OVRM10208F03, expressed in ovary		NM_203504.2	9908	G3BP2	GTPase activating protein (SH3 domain) binding protein 2	0.498959	0.983323	0.783409
GO:0033036	macromolecule localization	AY609666.1	Sus scrofa clone Clu_24219.scr.msk.p1.Contig4, mRNA sequence		NM_016041.3	51009	DERL2	Der1-like domain family, member 2	0.498959	0.983323	0.783409
GO:0033036	macromolecule localization	AY609726.1	Sus scrofa clone Clu_27891.scr.msk.p1.Contig1, mRNA sequence		NM_001663.3	382	ARF6	ADP-ribosylation factor 6	0.498959	0.983323	0.783409
GO:0033036	macromolecule localization	BP158662	BP158662 full-length enriched swine cDNA library, adult spleen Sus scrofa cDNA clone SPL010018F11 5', mRNA sequence						0.498959	0.983323	0.783409
GO:0033036	macromolecule localization	CK454638	915131 MARC 4PIG Sus scrofa cDNA 5', mRNA sequence						0.498959	0.983323	0.783409
GO:0033036	macromolecule localization	DN104456	1100249 MARC 4PIG Sus scrofa cDNA 5', mRNA sequence						0.498959	0.983323	0.783409
GO:0033036	macromolecule localization	DR120938	COG3c1 Pig pBluescript and pTrueBlue library Sus scrofa cDNA 5', mRNA sequence						0.498959	0.983323	0.783409
GO:0033036	macromolecule localization	EV984595	rcmu37_l22.y1 cmu Sus scrofa cDNA 5', mRNA sequence						0.498959	0.983323	0.783409
GO:0007600	sensory perception	BX665103	BX665103 Sus Scrofa library (scag) Sus scrofa cDNA clone scag0004.c.03 5prim, mRNA sequence						0.519339	0.983967	0.383732
GO:0051049	regulation of transport	EW158560	reye1608b_e17.y1 eye Sus scrofa cDNA 5', mRNA sequence						0.519339	0.983967	0.383732
GO:0051246	regulation of protein metabolic process	AK234633.1	Sus scrofa mRNA, clone:OVR010100E10, expressed in ovary		BC005295.1	10605	PAIP1	poly(A) binding protein interacting protein 1	0.534569	0.984416	0.607324
GO:0051246	regulation of protein metabolic process	BX915128	BX915128 Sus Scrofa library (scan) Sus scrofa cDNA clone scan0028.a.21 5prim, mRNA sequence						0.534569	0.984416	0.607324
GO:0051246	regulation of protein metabolic process	DN120593	1120622 MARC 4PIG Sus scrofa cDNA 5', mRNA sequence						0.534569	0.984416	0.607324
GO:0009062	fatty acid catabolic process	AK239600.1	Sus scrofa mRNA, clone:THY010115C09, expressed in thymus		AK291127.1	1632	DCI	dodecenoyl-Coenzyme A delta isomerase (3,2 trans-enoyl-Coenzyme A isomerase)	0.543959	0.984681	3.21376
GO:0031123	RNA 3'-end processing	AK233382.1	Sus scrofa mRNA, clone:LVRM10136B04, expressed in liver		CR594689.1	7884	SLBP	stem-loop binding protein	0.543959	0.984681	3.21376
GO:0007608	sensory perception of smell	BX665103	BX665103 Sus Scrofa library (scag) Sus scrofa cDNA clone scag0004.c.03 5prim, mRNA sequence						0.543959	0.984681	3.21376
GO:0007606	sensory perception of chemical stimulus	BX665103	BX665103 Sus Scrofa library (scag) Sus scrofa cDNA clone scag0004.c.03 5prim, mRNA sequence						0.543959	0.984681	3.21376
GO:0002377	immunoglobulin production	CN164178	994302 MARC 4PIG Sus scrofa cDNA 5', mRNA sequence						0.543959	0.984681	3.21376
GO:0045768	positive regulation of anti-apoptosis	DN120593	1120622 MARC 4PIG Sus scrofa cDNA 5', mRNA sequence						0.543959	0.984681	3.21376
GO:0030833	regulation of actin filament polymerization	DN120593	1120622 MARC 4PIG Sus scrofa cDNA 5', mRNA sequence						0.543959	0.984681	3.21376
GO:0007098	centrosome cycle	DN132970	996409 MARC 4PIG Sus scrofa cDNA 5', mRNA sequence						0.543959	0.984681	3.21376
GO:0003015	heart process	DV904076	POSM0605028_M02R porcine skeletal muscle cDNA library (PoSM) Sus scrofa cDNA 3', mRNA sequence						0.543959	0.984681	3.21376
GO:0060047	heart contraction	DV904076	POSM0605028_M02R porcine skeletal muscle cDNA library (PoSM) Sus scrofa cDNA 3', mRNA sequence						0.543959	0.984681	3.21376
GO:0055003	cardiac myofibril assembly	DV904076	POSM0605028_M02R porcine skeletal muscle cDNA library (PoSM) Sus scrofa cDNA 3', mRNA sequence						0.543959	0.984681	3.21376
GO:0055013	cardiac muscle cell development	DV904076	POSM0605028_M02R porcine skeletal muscle cDNA library (PoSM) Sus scrofa cDNA 3', mRNA sequence						0.543959	0.984681	3.21376
GO:0006891	intra-Golgi vesicle-mediated transport	DR120938	COG3c1 Pig pBluescript and pTrueBlue library Sus scrofa cDNA 5', mRNA sequence						0.543959	0.984681	3.21376
GO:0019439	aromatic compound catabolic process	AK236389	Sus scrofa mRNA, clone:OVRM10187H12, expressed in ovary	EPHX1	NM_000120.3	2052	EPHX1	epoxide hydrolase 1, microsomal (xenobiotic)	0.543959	0.984681	3.21376
GO:0015800	acidic amino acid transport	AK234908	Sus scrofa mRNA, clone:OVRM10028H08, expressed in ovary	LOC595127	AB097051.1	10550	ARL6IP5	ADP-ribosylation-like factor 6 interacting protein 5	0.543959	0.984681	3.21376
GO:0015813	L-glutamate transport	AK234908	Sus scrofa mRNA, clone:OVRM10028H08, expressed in ovary	LOC595127	AB097051.1	10550	ARL6IP5	ADP-ribosylation-like factor 6 interacting protein 5	0.543959	0.984681	3.21376
GO:0008543	fibroblast growth factor receptor signaling pathway	EW144888	rese17c_m9.y1 ese Sus scrofa cDNA 5', mRNA sequence						0.543959	0.984681	3.21376
GO:0030001	metal ion transport	AK232136.1	Sus scrofa mRNA, clone:LNG010086D03, expressed in lung		AK057903.1	1318	SLC31A2	solute carrier family 31 (copper transporters), member 2	0.546803	0.98476	0.535626
GO:0040011	locomotion	AK235604.1	Sus scrofa mRNA, clone:OVRM10097B08, expressed in ovary		NM_001048251.1	123920	CMTM3	CKLF-like MARVEL transmembrane domain containing 3	0.546803	0.98476	0.535626
GO:0040011	locomotion	DT324183	SusFleck_BF_0033_0036_5_pCNS_D01 SusFleck Backfat Sus scrofa cDNA clone 0033_0036_D01 5', mRNA sequence						0.546803	0.98476	0.535626
GO:0030001	metal ion transport	EW367525	rmas918b_h23.y1 mas Sus scrofa cDNA 5', mRNA sequence						0.546803	0.98476	0.535626
GO:0007420	brain development	AK233000.1	Sus scrofa mRNA, clone:LVRM10065H01, expressed in liver		BC028234.1	8775	NAPA	N-ethylmaleimide-sensitive factor attachment protein, alpha	0.55177	0.984895	1.64107
GO:0007420	brain development	AY610394.1	Sus scrofa clone reru31c_i7.y1.abd, mRNA sequence		NM_002495.2	4724	NDUFS4	NADH dehydrogenase (ubiquinone) Fe-S protein 4, 18kDa (NADH-coenzyme Q reductase)	0.55177	0.984895	1.64107
GO:0007420	brain development	DN100858	1000249 MARC 4PIG Sus scrofa cDNA 5', mRNA sequence						0.55177	0.984895	1.64107
GO:0048513	organ development	AK230559.1	Sus scrofa mRNA, clone:AMP010010A02, expressed in alveolar macrophage	----	BC064357.1	8301	PICALM	phosphatidylinositol binding clathrin assembly protein	0.555767	0.985002	1.18548
GO:0048513	organ development	AK233000.1	Sus scrofa mRNA, clone:LVRM10065H01, expressed in liver		BC028234.1	8775	NAPA	N-ethylmaleimide-sensitive factor attachment protein, alpha	0.555767	0.985002	1.18548
GO:0048513	organ development	AF329358.1	Sus scrofa laminin beta-1 chain mRNA, partial cds	LAMB1	NM_002291.2	3912	LAMB1	laminin, beta 1	0.555767	0.985002	1.18548
GO:0048513	organ development	AY609606.1	Sus scrofa clone Clu_207459.scr.msk.p1.Contig1, mRNA sequence		NM_001128209.1	6444	SGCD	sarcoglycan, delta (35kDa dystrophin-associated glycoprotein)	0.555767	0.985002	1.18548
GO:0048513	organ development	AY610394.1	Sus scrofa clone reru31c_i7.y1.abd, mRNA sequence		NM_002495.2	4724	NDUFS4	NADH dehydrogenase (ubiquinone) Fe-S protein 4, 18kDa (NADH-coenzyme Q reductase)	0.555767	0.985002	1.18548
GO:0048513	organ development	BX672955	BX672955 Sus Scrofa library (scac) Sus scrofa cDNA clone scac0044.o.04 5prim, mRNA sequence						0.555767	0.985002	1.18548
GO:0048513	organ development	BX923548	BX923548 Sus Scrofa library (scan) Sus scrofa cDNA clone scan0012.k.22 5prim, mRNA sequence						0.555767	0.985002	1.18548
GO:0048513	organ development	BX925993	BX925993 Sus Scrofa library (scan) Sus scrofa cDNA clone scan0021.f.19 5prim, mRNA sequence						0.555767	0.985002	1.18548
GO:0048513	organ development	DN100858	1000249 MARC 4PIG Sus scrofa cDNA 5', mRNA sequence						0.555767	0.985002	1.18548
GO:0048513	organ development	DN120593	1120622 MARC 4PIG Sus scrofa cDNA 5', mRNA sequence						0.555767	0.985002	1.18548
GO:0048513	organ development	DN128580	1142660 MARC 4PIG Sus scrofa cDNA 3', mRNA sequence						0.555767	0.985002	1.18548
GO:0048513	organ development	DV904076	POSM0605028_M02R porcine skeletal muscle cDNA library (PoSM) Sus scrofa cDNA 3', mRNA sequence						0.555767	0.985002	1.18548
GO:0048513	organ development	DT324183	SusFleck_BF_0033_0036_5_pCNS_D01 SusFleck Backfat Sus scrofa cDNA clone 0033_0036_D01 5', mRNA sequence						0.555767	0.985002	1.18548
GO:0048513	organ development	EW088403	recc2833c_i12.y1 ecc Sus scrofa cDNA 5', mRNA sequence						0.555767	0.985002	1.18548
GO:0048513	organ development	EW137538	reru09c_h4.y1 eru Sus scrofa cDNA 5', mRNA sequence						0.555767	0.985002	1.18548
GO:0048513	organ development	EW417768	rnbm12b_c21.y1 nbm Sus scrofa cDNA 5', mRNA sequence						0.555767	0.985002	1.18548
GO:0065008	regulation of biological quality	AK236127.1	Sus scrofa mRNA, clone:OVRM10155A01, expressed in ovary		NM_001135654.1	8761	PABPC4	poly(A) binding protein, cytoplasmic 4 (inducible form)	0.562009	0.985166	0.781724
GO:0065008	regulation of biological quality	AK236182.1	Sus scrofa mRNA, clone:OVRM10161E01, expressed in ovary		NM_005006.5	4719	NDUFS1	NADH dehydrogenase (ubiquinone) Fe-S protein 1, 75kDa (NADH-coenzyme Q reductase)	0.562009	0.985166	0.781724
GO:0065008	regulation of biological quality	AK239756.1	Sus scrofa mRNA, clone:THY010202F01, expressed in thymus		BC004465.1	54386	TERF2IP	telomeric repeat binding factor 2, interacting protein	0.562009	0.985166	0.781724
GO:0065008	regulation of biological quality	AY609666.1	Sus scrofa clone Clu_24219.scr.msk.p1.Contig4, mRNA sequence		NM_016041.3	51009	DERL2	Der1-like domain family, member 2	0.562009	0.985166	0.781724
GO:0065008	regulation of biological quality	DN120593	1120622 MARC 4PIG Sus scrofa cDNA 5', mRNA sequence						0.562009	0.985166	0.781724
GO:0065008	regulation of biological quality	DV904076	POSM0605028_M02R porcine skeletal muscle cDNA library (PoSM) Sus scrofa cDNA 3', mRNA sequence						0.562009	0.985166	0.781724
GO:0065008	regulation of biological quality	EW357862	rlyg24_g14.y1 lyg Sus scrofa cDNA 5', mRNA sequence						0.562009	0.985166	0.781724
GO:0065008	regulation of biological quality	EW421594	rnca11b_e13.y1 nca Sus scrofa cDNA 5', mRNA sequence						0.562009	0.985166	0.781724
GO:0065008	regulation of biological quality	BE235135	142484 MARC 1PIG Sus scrofa cDNA 5', mRNA sequence						0.562009	0.985166	0.781724
GO:0048856	anatomical structure development	AK230559.1	Sus scrofa mRNA, clone:AMP010010A02, expressed in alveolar macrophage	----	BC064357.1	8301	PICALM	phosphatidylinositol binding clathrin assembly protein	0.569166	0.98535	0.863858
GO:0048856	anatomical structure development	AK233000.1	Sus scrofa mRNA, clone:LVRM10065H01, expressed in liver		BC028234.1	8775	NAPA	N-ethylmaleimide-sensitive factor attachment protein, alpha	0.569166	0.98535	0.863858
GO:0048856	anatomical structure development	AF329358.1	Sus scrofa laminin beta-1 chain mRNA, partial cds	LAMB1	NM_002291.2	3912	LAMB1	laminin, beta 1	0.569166	0.98535	0.863858
GO:0048856	anatomical structure development	AY609606.1	Sus scrofa clone Clu_207459.scr.msk.p1.Contig1, mRNA sequence		NM_001128209.1	6444	SGCD	sarcoglycan, delta (35kDa dystrophin-associated glycoprotein)	0.569166	0.98535	0.863858
GO:0048856	anatomical structure development	AY610394.1	Sus scrofa clone reru31c_i7.y1.abd, mRNA sequence		NM_002495.2	4724	NDUFS4	NADH dehydrogenase (ubiquinone) Fe-S protein 4, 18kDa (NADH-coenzyme Q reductase)	0.569166	0.98535	0.863858
GO:0048856	anatomical structure development	BX672955	BX672955 Sus Scrofa library (scac) Sus scrofa cDNA clone scac0044.o.04 5prim, mRNA sequence						0.569166	0.98535	0.863858
GO:0048856	anatomical structure development	BP158662	BP158662 full-length enriched swine cDNA library, adult spleen Sus scrofa cDNA clone SPL010018F11 5', mRNA sequence						0.569166	0.98535	0.863858
GO:0048856	anatomical structure development	BX923548	BX923548 Sus Scrofa library (scan) Sus scrofa cDNA clone scan0012.k.22 5prim, mRNA sequence						0.569166	0.98535	0.863858
GO:0048856	anatomical structure development	BX925993	BX925993 Sus Scrofa library (scan) Sus scrofa cDNA clone scan0021.f.19 5prim, mRNA sequence						0.569166	0.98535	0.863858
GO:0048856	anatomical structure development	CN164178	994302 MARC 4PIG Sus scrofa cDNA 5', mRNA sequence						0.569166	0.98535	0.863858
GO:0048856	anatomical structure development	DN100858	1000249 MARC 4PIG Sus scrofa cDNA 5', mRNA sequence						0.569166	0.98535	0.863858
GO:0048856	anatomical structure development	DN112655	1111858 MARC 4PIG Sus scrofa cDNA 3', mRNA sequence						0.569166	0.98535	0.863858
GO:0048856	anatomical structure development	DN120593	1120622 MARC 4PIG Sus scrofa cDNA 5', mRNA sequence						0.569166	0.98535	0.863858
GO:0048856	anatomical structure development	DN128580	1142660 MARC 4PIG Sus scrofa cDNA 3', mRNA sequence						0.569166	0.98535	0.863858
GO:0048856	anatomical structure development	DV904076	POSM0605028_M02R porcine skeletal muscle cDNA library (PoSM) Sus scrofa cDNA 3', mRNA sequence						0.569166	0.98535	0.863858
GO:0048856	anatomical structure development	DT324183	SusFleck_BF_0033_0036_5_pCNS_D01 SusFleck Backfat Sus scrofa cDNA clone 0033_0036_D01 5', mRNA sequence						0.569166	0.98535	0.863858
GO:0048856	anatomical structure development	EW088403	recc2833c_i12.y1 ecc Sus scrofa cDNA 5', mRNA sequence						0.569166	0.98535	0.863858
GO:0048856	anatomical structure development	EW137538	reru09c_h4.y1 eru Sus scrofa cDNA 5', mRNA sequence						0.569166	0.98535	0.863858
GO:0048856	anatomical structure development	EW158560	reye1608b_e17.y1 eye Sus scrofa cDNA 5', mRNA sequence						0.569166	0.98535	0.863858
GO:0048856	anatomical structure development	EW228094	rgul0125_o12.y1 gul Sus scrofa cDNA 5', mRNA sequence						0.569166	0.98535	0.863858
GO:0048856	anatomical structure development	EW417768	rnbm12b_c21.y1 nbm Sus scrofa cDNA 5', mRNA sequence						0.569166	0.98535	0.863858
GO:0003008	system process	AK240563.1	Sus scrofa mRNA, clone:UTR010098F11, expressed in uterus		NM_001165928.1	1605	DAG1	dystroglycan 1 (dystrophin-associated glycoprotein 1)	0.57359	0.985461	1.24203
GO:0003008	system process	AK239436.1	Sus scrofa mRNA, clone:THY010103G12, expressed in thymus		NM_003803.3	8736	MYOM1	myomesin 1, 185kDa	0.57359	0.985461	1.24203
GO:0003008	system process	BX665103	BX665103 Sus Scrofa library (scag) Sus scrofa cDNA clone scag0004.c.03 5prim, mRNA sequence						0.57359	0.985461	1.24203
GO:0003008	system process	BX667682	BX667682 Sus Scrofa library (scac) Sus scrofa cDNA clone scac0026.g.10 5prim, mRNA sequence						0.57359	0.985461	1.24203
GO:0003008	system process	CK454645	915140 MARC 4PIG Sus scrofa cDNA 5', mRNA sequence						0.57359	0.985461	1.24203
GO:0003008	system process	BX922054	BX922054 Sus Scrofa library (scan) Sus scrofa cDNA clone scan0023.e.20 5prim, mRNA sequence						0.57359	0.985461	1.24203
GO:0003008	system process	BX925993	BX925993 Sus Scrofa library (scan) Sus scrofa cDNA clone scan0021.f.19 5prim, mRNA sequence						0.57359	0.985461	1.24203
GO:0003008	system process	CN163858	993962 MARC 4PIG Sus scrofa cDNA 5', mRNA sequence						0.57359	0.985461	1.24203
GO:0003008	system process	DV904076	POSM0605028_M02R porcine skeletal muscle cDNA library (PoSM) Sus scrofa cDNA 3', mRNA sequence						0.57359	0.985461	1.24203
GO:0003008	system process	EW055180	rpigcb_10659.y1 cty Sus scrofa cDNA 5', mRNA sequence						0.57359	0.985461	1.24203
GO:0048869	cellular developmental process	AK233000.1	Sus scrofa mRNA, clone:LVRM10065H01, expressed in liver		BC028234.1	8775	NAPA	N-ethylmaleimide-sensitive factor attachment protein, alpha	0.576647	0.985537	0.825261
GO:0048869	cellular developmental process	AF329358.1	Sus scrofa laminin beta-1 chain mRNA, partial cds	LAMB1	NM_002291.2	3912	LAMB1	laminin, beta 1	0.576647	0.985537	0.825261
GO:0048869	cellular developmental process	BP158662	BP158662 full-length enriched swine cDNA library, adult spleen Sus scrofa cDNA clone SPL010018F11 5', mRNA sequence						0.576647	0.985537	0.825261
GO:0048869	cellular developmental process	BP143486	BP143486 full-length enriched swine cDNA library, adult ovary Sus scrofa cDNA clone OVR010017F01 5', mRNA sequence						0.576647	0.985537	0.825261
GO:0048869	cellular developmental process	CK449659	893247 MARC 4PIG Sus scrofa cDNA 5', mRNA sequence						0.576647	0.985537	0.825261
GO:0048869	cellular developmental process	BX923548	BX923548 Sus Scrofa library (scan) Sus scrofa cDNA clone scan0012.k.22 5prim, mRNA sequence						0.576647	0.985537	0.825261
GO:0048869	cellular developmental process	BX925993	BX925993 Sus Scrofa library (scan) Sus scrofa cDNA clone scan0021.f.19 5prim, mRNA sequence						0.576647	0.985537	0.825261
GO:0048869	cellular developmental process	DN112655	1111858 MARC 4PIG Sus scrofa cDNA 3', mRNA sequence						0.576647	0.985537	0.825261
GO:0048869	cellular developmental process	DN120593	1120622 MARC 4PIG Sus scrofa cDNA 5', mRNA sequence						0.576647	0.985537	0.825261
GO:0048869	cellular developmental process	DV904076	POSM0605028_M02R porcine skeletal muscle cDNA library (PoSM) Sus scrofa cDNA 3', mRNA sequence						0.576647	0.985537	0.825261
GO:0048869	cellular developmental process	CX057037	PDUts2009C04 Porcine testis cDNA library II Sus scrofa cDNA clone PDUts2009C04 5' similar to homologue to ref|NM_017826.1| Homo sapiens hypothetical protein FLJ20449 (FLJ20449), mRNA, mRNA sequence						0.576647	0.985537	0.825261
GO:0048869	cellular developmental process	EV867707	rpbfe0123_n8.y1 bfe Sus scrofa cDNA 5', mRNA sequence						0.576647	0.985537	0.825261
GO:0048869	cellular developmental process	EW088403	recc2833c_i12.y1 ecc Sus scrofa cDNA 5', mRNA sequence						0.576647	0.985537	0.825261
GO:0045321	leukocyte activation	CN164178	994302 MARC 4PIG Sus scrofa cDNA 5', mRNA sequence						0.582275	0.985675	0.408096
GO:0010740	positive regulation of protein kinase cascade	BE014011	125574 MARC 1PIG Sus scrofa cDNA 5', mRNA sequence						0.582275	0.985675	0.408096
GO:0045934	negative regulation of nucleobase, nucleoside, nucleotide and nucleic acid metabolic process	AK239756.1	Sus scrofa mRNA, clone:THY010202F01, expressed in thymus		BC004465.1	54386	TERF2IP	telomeric repeat binding factor 2, interacting protein	0.592659	0.985922	0.681061
GO:0045934	negative regulation of nucleobase, nucleoside, nucleotide and nucleic acid metabolic process	CK467405	938702 MARC 4PIG Sus scrofa cDNA 5', mRNA sequence						0.592659	0.985922	0.681061
GO:0045934	negative regulation of nucleobase, nucleoside, nucleotide and nucleic acid metabolic process	CK467896	939242 MARC 4PIG Sus scrofa cDNA 5', mRNA sequence						0.592659	0.985922	0.681061
GO:0045934	negative regulation of nucleobase, nucleoside, nucleotide and nucleic acid metabolic process	EW421594	rnca11b_e13.y1 nca Sus scrofa cDNA 5', mRNA sequence						0.592659	0.985922	0.681061
GO:0048232	male gamete generation	CX057037	PDUts2009C04 Porcine testis cDNA library II Sus scrofa cDNA clone PDUts2009C04 5' similar to homologue to ref|NM_017826.1| Homo sapiens hypothetical protein FLJ20449 (FLJ20449), mRNA, mRNA sequence						0.598973	0.986069	0.414678
GO:0007283	spermatogenesis	CX057037	PDUts2009C04 Porcine testis cDNA library II Sus scrofa cDNA clone PDUts2009C04 5' similar to homologue to ref|NM_017826.1| Homo sapiens hypothetical protein FLJ20449 (FLJ20449), mRNA, mRNA sequence						0.598973	0.986069	0.414678
GO:0007264	small GTPase mediated signal transduction	EW089566	recc2817c_e7.y1 ecc Sus scrofa cDNA 5', mRNA sequence						0.598973	0.986069	0.414678
GO:0015672	monovalent inorganic cation transport	EW367525	rmas918b_h23.y1 mas Sus scrofa cDNA 5', mRNA sequence						0.598973	0.986069	0.414678
GO:0009311	oligosaccharide metabolic process	AK236028.1	Sus scrofa mRNA, clone:OVRM10140A03, expressed in ovary		AY358465.1	11253	MAN1B1	mannosidase, alpha, class 1B, member 1	0.600612	0.986106	2.85667
GO:0046164	alcohol catabolic process	AK236324.1	Sus scrofa mRNA, clone:OVRM10181E04, expressed in ovary		BC000439.2	5162	PDHB	pyruvate dehydrogenase (lipoamide) beta	0.600612	0.986106	2.85667
GO:0006007	glucose catabolic process	AK236324.1	Sus scrofa mRNA, clone:OVRM10181E04, expressed in ovary		BC000439.2	5162	PDHB	pyruvate dehydrogenase (lipoamide) beta	0.600612	0.986106	2.85667
GO:0046365	monosaccharide catabolic process	AK236324.1	Sus scrofa mRNA, clone:OVRM10181E04, expressed in ovary		BC000439.2	5162	PDHB	pyruvate dehydrogenase (lipoamide) beta	0.600612	0.986106	2.85667
GO:0019320	hexose catabolic process	AK236324.1	Sus scrofa mRNA, clone:OVRM10181E04, expressed in ovary		BC000439.2	5162	PDHB	pyruvate dehydrogenase (lipoamide) beta	0.600612	0.986106	2.85667
GO:0009123	nucleoside monophosphate metabolic process	AK236416.1	Sus scrofa mRNA, clone:OVRM10189H07, expressed in ovary		NM_001071.2	7298	TYMS	thymidylate synthetase	0.600612	0.986106	2.85667
GO:0016054	organic acid catabolic process	AK239600.1	Sus scrofa mRNA, clone:THY010115C09, expressed in thymus		AK291127.1	1632	DCI	dodecenoyl-Coenzyme A delta isomerase (3,2 trans-enoyl-Coenzyme A isomerase)	0.600612	0.986106	2.85667
GO:0046395	carboxylic acid catabolic process	AK239600.1	Sus scrofa mRNA, clone:THY010115C09, expressed in thymus		AK291127.1	1632	DCI	dodecenoyl-Coenzyme A delta isomerase (3,2 trans-enoyl-Coenzyme A isomerase)	0.600612	0.986106	2.85667
GO:0034440	lipid oxidation	AK239600.1	Sus scrofa mRNA, clone:THY010115C09, expressed in thymus		AK291127.1	1632	DCI	dodecenoyl-Coenzyme A delta isomerase (3,2 trans-enoyl-Coenzyme A isomerase)	0.600612	0.986106	2.85667
GO:0019395	fatty acid oxidation	AK239600.1	Sus scrofa mRNA, clone:THY010115C09, expressed in thymus		AK291127.1	1632	DCI	dodecenoyl-Coenzyme A delta isomerase (3,2 trans-enoyl-Coenzyme A isomerase)	0.600612	0.986106	2.85667
GO:0045927	positive regulation of growth	AY609666.1	Sus scrofa clone Clu_24219.scr.msk.p1.Contig4, mRNA sequence		NM_016041.3	51009	DERL2	Der1-like domain family, member 2	0.600612	0.986106	2.85667
GO:0048146	positive regulation of fibroblast proliferation	AY610394.1	Sus scrofa clone reru31c_i7.y1.abd, mRNA sequence		NM_002495.2	4724	NDUFS4	NADH dehydrogenase (ubiquinone) Fe-S protein 4, 18kDa (NADH-coenzyme Q reductase)	0.600612	0.986106	2.85667
GO:0008584	male gonad development	BX672955	BX672955 Sus Scrofa library (scac) Sus scrofa cDNA clone scac0044.o.04 5prim, mRNA sequence						0.600612	0.986106	2.85667
GO:0046546	development of primary male sexual characteristics	BX672955	BX672955 Sus Scrofa library (scac) Sus scrofa cDNA clone scac0044.o.04 5prim, mRNA sequence						0.600612	0.986106	2.85667
GO:0002440	production of molecular mediator of immune response	CN164178	994302 MARC 4PIG Sus scrofa cDNA 5', mRNA sequence						0.600612	0.986106	2.85667
GO:0001953	negative regulation of cell-matrix adhesion	DN120593	1120622 MARC 4PIG Sus scrofa cDNA 5', mRNA sequence						0.600612	0.986106	2.85667
GO:0007131	reciprocal meiotic recombination	AJ950507	AJ950507 KN404_1 Sus scrofa cDNA clone C0007741i12 5', mRNA sequence						0.600612	0.986106	2.85667
GO:0006942	regulation of striated muscle contraction	DV904076	POSM0605028_M02R porcine skeletal muscle cDNA library (PoSM) Sus scrofa cDNA 3', mRNA sequence						0.600612	0.986106	2.85667
GO:0048477	oogenesis	CX057037	PDUts2009C04 Porcine testis cDNA library II Sus scrofa cDNA clone PDUts2009C04 5' similar to homologue to ref|NM_017826.1| Homo sapiens hypothetical protein FLJ20449 (FLJ20449), mRNA, mRNA sequence						0.600612	0.986106	2.85667
GO:0007044	cell-substrate junction assembly	DT324183	SusFleck_BF_0033_0036_5_pCNS_D01 SusFleck Backfat Sus scrofa cDNA clone 0033_0036_D01 5', mRNA sequence						0.600612	0.986106	2.85667
GO:0030111	regulation of Wnt receptor signaling pathway	BE014011	125574 MARC 1PIG Sus scrofa cDNA 5', mRNA sequence						0.600612	0.986106	2.85667
GO:0032268	regulation of cellular protein metabolic process	AK234633.1	Sus scrofa mRNA, clone:OVR010100E10, expressed in ovary		BC005295.1	10605	PAIP1	poly(A) binding protein interacting protein 1	0.605315	0.986213	0.637439
GO:0032268	regulation of cellular protein metabolic process	BX915128	BX915128 Sus Scrofa library (scan) Sus scrofa cDNA clone scan0028.a.21 5prim, mRNA sequence						0.605315	0.986213	0.637439
GO:0032268	regulation of cellular protein metabolic process	DN120593	1120622 MARC 4PIG Sus scrofa cDNA 5', mRNA sequence						0.605315	0.986213	0.637439
GO:0051253	negative regulation of RNA metabolic process	CK467896	939242 MARC 4PIG Sus scrofa cDNA 5', mRNA sequence						0.614996	0.986427	0.565056
GO:0051253	negative regulation of RNA metabolic process	EW421594	rnca11b_e13.y1 nca Sus scrofa cDNA 5', mRNA sequence						0.614996	0.986427	0.565056
GO:0016043	cellular component organization	AK234277.1	Sus scrofa mRNA, clone:OVR010036G03, expressed in ovary		NM_213636.1	9260	PDLIM7	PDZ and LIM domain 7 (enigma)	0.616396	0.986457	0.892251
GO:0016043	cellular component organization	AK237695.1	Sus scrofa mRNA, clone:SPL010081H01, expressed in spleen		BC053635.1	8602	NOP14	NOP14 nucleolar protein homolog (yeast)	0.616396	0.986457	0.892251
GO:0016043	cellular component organization	AK240563.1	Sus scrofa mRNA, clone:UTR010098F11, expressed in uterus		NM_001165928.1	1605	DAG1	dystroglycan 1 (dystrophin-associated glycoprotein 1)	0.616396	0.986457	0.892251
GO:0016043	cellular component organization	AK234932.1	Sus scrofa mRNA, clone:OVRM10033G12, expressed in ovary		AK311348.1	2189	FANCG	Fanconi anemia, complementation group G	0.616396	0.986457	0.892251
GO:0016043	cellular component organization	AK232555.1	Sus scrofa mRNA, clone:LVR010073A12, expressed in liver		NM_004208.2	9131	AIFM1	apoptosis-inducing factor, mitochondrion-associated, 1	0.616396	0.986457	0.892251
GO:0016043	cellular component organization	AK230559.1	Sus scrofa mRNA, clone:AMP010010A02, expressed in alveolar macrophage	----	BC064357.1	8301	PICALM	phosphatidylinositol binding clathrin assembly protein	0.616396	0.986457	0.892251
GO:0016043	cellular component organization	AK239756.1	Sus scrofa mRNA, clone:THY010202F01, expressed in thymus		BC004465.1	54386	TERF2IP	telomeric repeat binding factor 2, interacting protein	0.616396	0.986457	0.892251
GO:0016043	cellular component organization	AK237149.1	Sus scrofa mRNA, clone:SPL010004H09, expressed in spleen		AK092008.1	54892	NCAPG2	non-SMC condensin II complex, subunit G2	0.616396	0.986457	0.892251
GO:0016043	cellular component organization	AK240181.1	Sus scrofa mRNA, clone:UTR010038F11, expressed in uterus		NM_032514.2	84557	MAP1LC3A	microtubule-associated protein 1 light chain 3 alpha	0.616396	0.986457	0.892251
GO:0016043	cellular component organization	AK233966.1	Sus scrofa mRNA, clone:MLN010082C02, expressed in mesenteric lymph node		BC107696.1	56915	EXOSC5	exosome component 5	0.616396	0.986457	0.892251
GO:0016043	cellular component organization	AF329358.1	Sus scrofa laminin beta-1 chain mRNA, partial cds	LAMB1	NM_002291.2	3912	LAMB1	laminin, beta 1	0.616396	0.986457	0.892251
GO:0016043	cellular component organization	AY610031.1	Sus scrofa clone Clu_58583.scr.msk.p1.Contig3, mRNA sequence		NM_003616.2	8487	SIP1	survival of motor neuron protein interacting protein 1	0.616396	0.986457	0.892251
GO:0016043	cellular component organization	AY610394.1	Sus scrofa clone reru31c_i7.y1.abd, mRNA sequence		NM_002495.2	4724	NDUFS4	NADH dehydrogenase (ubiquinone) Fe-S protein 4, 18kDa (NADH-coenzyme Q reductase)	0.616396	0.986457	0.892251
GO:0016043	cellular component organization	BX667682	BX667682 Sus Scrofa library (scac) Sus scrofa cDNA clone scac0026.g.10 5prim, mRNA sequence						0.616396	0.986457	0.892251
GO:0016043	cellular component organization	BP158662	BP158662 full-length enriched swine cDNA library, adult spleen Sus scrofa cDNA clone SPL010018F11 5', mRNA sequence						0.616396	0.986457	0.892251
GO:0016043	cellular component organization	CK452762	908422 MARC 4PIG Sus scrofa cDNA 5', mRNA sequence						0.616396	0.986457	0.892251
GO:0016043	cellular component organization	CK454638	915131 MARC 4PIG Sus scrofa cDNA 5', mRNA sequence						0.616396	0.986457	0.892251
GO:0016043	cellular component organization	BX914521	BX914521 Sus Scrofa library (scan) Sus scrofa cDNA clone scan0001.d.06 5prim, mRNA sequence						0.616396	0.986457	0.892251
GO:0016043	cellular component organization	BX918412	BX918412 Sus Scrofa library (scan) Sus scrofa cDNA clone scan0038.i.09 5prim, mRNA sequence						0.616396	0.986457	0.892251
GO:0016043	cellular component organization	BX923548	BX923548 Sus Scrofa library (scan) Sus scrofa cDNA clone scan0012.k.22 5prim, mRNA sequence						0.616396	0.986457	0.892251
GO:0016043	cellular component organization	BX925993	BX925993 Sus Scrofa library (scan) Sus scrofa cDNA clone scan0021.f.19 5prim, mRNA sequence						0.616396	0.986457	0.892251
GO:0016043	cellular component organization	DN132970	996409 MARC 4PIG Sus scrofa cDNA 5', mRNA sequence						0.616396	0.986457	0.892251
GO:0016043	cellular component organization	DV904076	POSM0605028_M02R porcine skeletal muscle cDNA library (PoSM) Sus scrofa cDNA 3', mRNA sequence						0.616396	0.986457	0.892251
GO:0016043	cellular component organization	DT324183	SusFleck_BF_0033_0036_5_pCNS_D01 SusFleck Backfat Sus scrofa cDNA clone 0033_0036_D01 5', mRNA sequence						0.616396	0.986457	0.892251
GO:0016043	cellular component organization	EV867707	rpbfe0123_n8.y1 bfe Sus scrofa cDNA 5', mRNA sequence						0.616396	0.986457	0.892251
GO:0016043	cellular component organization	EW055180	rpigcb_10659.y1 cty Sus scrofa cDNA 5', mRNA sequence						0.616396	0.986457	0.892251
GO:0016043	cellular component organization	EW421594	rnca11b_e13.y1 nca Sus scrofa cDNA 5', mRNA sequence						0.616396	0.986457	0.892251
GO:0032787	monocarboxylic acid metabolic process	AK239600.1	Sus scrofa mRNA, clone:THY010115C09, expressed in thymus		AK291127.1	1632	DCI	dodecenoyl-Coenzyme A delta isomerase (3,2 trans-enoyl-Coenzyme A isomerase)	0.617735	0.986486	0.642751
GO:0032787	monocarboxylic acid metabolic process	AK239646.1	Sus scrofa mRNA, clone:THY010118H06, expressed in thymus		BC066963.1	3032	HADHB	hydroxyacyl-Coenzyme A dehydrogenase/3-ketoacyl-Coenzyme A thiolase/enoyl-Coenzyme A hydratase (trifunctional protein), beta subunit	0.617735	0.986486	0.642751
GO:0032787	monocarboxylic acid metabolic process	AK236752.1	Sus scrofa mRNA, clone:OVRM10224E06, expressed in ovary		NM_005003.2	4706	NDUFAB1	NADH dehydrogenase (ubiquinone) 1, alpha/beta subcomplex, 1, 8kDa	0.617735	0.986486	0.642751
GO:0006974	response to DNA damage stimulus	AK234932.1	Sus scrofa mRNA, clone:OVRM10033G12, expressed in ovary		AK311348.1	2189	FANCG	Fanconi anemia, complementation group G	0.619588	0.986526	0.726272
GO:0006974	response to DNA damage stimulus	AK232555.1	Sus scrofa mRNA, clone:LVR010073A12, expressed in liver		NM_004208.2	9131	AIFM1	apoptosis-inducing factor, mitochondrion-associated, 1	0.619588	0.986526	0.726272
GO:0006974	response to DNA damage stimulus	AK236416.1	Sus scrofa mRNA, clone:OVRM10189H07, expressed in ovary		NM_001071.2	7298	TYMS	thymidylate synthetase	0.619588	0.986526	0.726272
GO:0006974	response to DNA damage stimulus	BX664880	BX664880 Sus Scrofa library (scag) Sus scrofa cDNA clone scag0005.d.07 5prim, mRNA sequence						0.619588	0.986526	0.726272
GO:0006974	response to DNA damage stimulus	AJ950507	AJ950507 KN404_1 Sus scrofa cDNA clone C0007741i12 5', mRNA sequence						0.619588	0.986526	0.726272
GO:0030705	cytoskeleton-dependent intracellular transport	CK454645	915140 MARC 4PIG Sus scrofa cDNA 5', mRNA sequence						0.624221	0.986625	1.77311
GO:0030705	cytoskeleton-dependent intracellular transport	EW137538	reru09c_h4.y1 eru Sus scrofa cDNA 5', mRNA sequence						0.624221	0.986625	1.77311
GO:0048518	positive regulation of biological process	AK232555.1	Sus scrofa mRNA, clone:LVR010073A12, expressed in liver		NM_004208.2	9131	AIFM1	apoptosis-inducing factor, mitochondrion-associated, 1	0.63077	0.986762	0.868257
GO:0048518	positive regulation of biological process	AF329358.1	Sus scrofa laminin beta-1 chain mRNA, partial cds	LAMB1	NM_002291.2	3912	LAMB1	laminin, beta 1	0.63077	0.986762	0.868257
GO:0048518	positive regulation of biological process	AY609666.1	Sus scrofa clone Clu_24219.scr.msk.p1.Contig4, mRNA sequence		NM_016041.3	51009	DERL2	Der1-like domain family, member 2	0.63077	0.986762	0.868257
GO:0048518	positive regulation of biological process	AY610394.1	Sus scrofa clone reru31c_i7.y1.abd, mRNA sequence		NM_002495.2	4724	NDUFS4	NADH dehydrogenase (ubiquinone) Fe-S protein 4, 18kDa (NADH-coenzyme Q reductase)	0.63077	0.986762	0.868257
GO:0048518	positive regulation of biological process	CK467405	938702 MARC 4PIG Sus scrofa cDNA 5', mRNA sequence						0.63077	0.986762	0.868257
GO:0048518	positive regulation of biological process	BX915041	BX915041 Sus Scrofa library (scan) Sus scrofa cDNA clone scan0027.c.13 5prim, mRNA sequence						0.63077	0.986762	0.868257
GO:0048518	positive regulation of biological process	BX918412	BX918412 Sus Scrofa library (scan) Sus scrofa cDNA clone scan0038.i.09 5prim, mRNA sequence						0.63077	0.986762	0.868257
GO:0048518	positive regulation of biological process	BX923548	BX923548 Sus Scrofa library (scan) Sus scrofa cDNA clone scan0012.k.22 5prim, mRNA sequence						0.63077	0.986762	0.868257
GO:0048518	positive regulation of biological process	CN158607	947410 MARC 4PIG Sus scrofa cDNA 5', mRNA sequence						0.63077	0.986762	0.868257
GO:0048518	positive regulation of biological process	CN164178	994302 MARC 4PIG Sus scrofa cDNA 5', mRNA sequence						0.63077	0.986762	0.868257
GO:0048518	positive regulation of biological process	DN120593	1120622 MARC 4PIG Sus scrofa cDNA 5', mRNA sequence						0.63077	0.986762	0.868257
GO:0048518	positive regulation of biological process	DN121268	1121355 MARC 4PIG Sus scrofa cDNA 3', mRNA sequence						0.63077	0.986762	0.868257
GO:0048518	positive regulation of biological process	DT324183	SusFleck_BF_0033_0036_5_pCNS_D01 SusFleck Backfat Sus scrofa cDNA clone 0033_0036_D01 5', mRNA sequence						0.63077	0.986762	0.868257
GO:0048518	positive regulation of biological process	EW222667	rgul0130_k18.y1 gul Sus scrofa cDNA 5', mRNA sequence						0.63077	0.986762	0.868257
GO:0048518	positive regulation of biological process	EW421594	rnca11b_e13.y1 nca Sus scrofa cDNA 5', mRNA sequence						0.63077	0.986762	0.868257
GO:0048518	positive regulation of biological process	EW464984	rnmm24c_m17.y1 nmm Sus scrofa cDNA 5', mRNA sequence						0.63077	0.986762	0.868257
GO:0048518	positive regulation of biological process	BE014011	125574 MARC 1PIG Sus scrofa cDNA 5', mRNA sequence						0.63077	0.986762	0.868257
GO:0048518	positive regulation of biological process	BE235135	142484 MARC 1PIG Sus scrofa cDNA 5', mRNA sequence						0.63077	0.986762	0.868257
GO:0050801	ion homeostasis	AK236182.1	Sus scrofa mRNA, clone:OVRM10161E01, expressed in ovary		NM_005006.5	4719	NDUFS1	NADH dehydrogenase (ubiquinone) Fe-S protein 1, 75kDa (NADH-coenzyme Q reductase)	0.633563	0.986819	0.428501
GO:0055082	cellular chemical homeostasis	AK236182.1	Sus scrofa mRNA, clone:OVRM10161E01, expressed in ovary		NM_005006.5	4719	NDUFS1	NADH dehydrogenase (ubiquinone) Fe-S protein 1, 75kDa (NADH-coenzyme Q reductase)	0.633563	0.986819	0.428501
GO:0006281	DNA repair	AK234932.1	Sus scrofa mRNA, clone:OVRM10033G12, expressed in ovary		AK311348.1	2189	FANCG	Fanconi anemia, complementation group G	0.637639	0.986902	0.699593
GO:0006281	DNA repair	AK236416.1	Sus scrofa mRNA, clone:OVRM10189H07, expressed in ovary		NM_001071.2	7298	TYMS	thymidylate synthetase	0.637639	0.986902	0.699593
GO:0006281	DNA repair	BX664880	BX664880 Sus Scrofa library (scag) Sus scrofa cDNA clone scag0005.d.07 5prim, mRNA sequence						0.637639	0.986902	0.699593
GO:0006281	DNA repair	AJ950507	AJ950507 KN404_1 Sus scrofa cDNA clone C0007741i12 5', mRNA sequence						0.637639	0.986902	0.699593
GO:0045892	negative regulation of transcription, DNA-dependent	CK467896	939242 MARC 4PIG Sus scrofa cDNA 5', mRNA sequence						0.64401	0.98703	0.577754
GO:0045892	negative regulation of transcription, DNA-dependent	EW421594	rnca11b_e13.y1 nca Sus scrofa cDNA 5', mRNA sequence						0.64401	0.98703	0.577754
GO:0006873	cellular ion homeostasis	AK236182.1	Sus scrofa mRNA, clone:OVRM10161E01, expressed in ovary		NM_005006.5	4719	NDUFS1	NADH dehydrogenase (ubiquinone) Fe-S protein 1, 75kDa (NADH-coenzyme Q reductase)	0.651462	0.987177	0.435763
GO:0009888	tissue development	DT324183	SusFleck_BF_0033_0036_5_pCNS_D01 SusFleck Backfat Sus scrofa cDNA clone 0033_0036_D01 5', mRNA sequence						0.651462	0.987177	0.435763
GO:0007005	mitochondrion organization	AK234932.1	Sus scrofa mRNA, clone:OVRM10033G12, expressed in ovary		AK311348.1	2189	FANCG	Fanconi anemia, complementation group G	0.653135	0.987209	1.714
GO:0007005	mitochondrion organization	AY610394.1	Sus scrofa clone reru31c_i7.y1.abd, mRNA sequence		NM_002495.2	4724	NDUFS4	NADH dehydrogenase (ubiquinone) Fe-S protein 4, 18kDa (NADH-coenzyme Q reductase)	0.653135	0.987209	1.714
GO:0000096	sulfur amino acid metabolic process	AK240417.1	Sus scrofa mRNA, clone:UTR010066E08, expressed in uterus		AB073609.1	55256	ADI1	acireductone dioxygenase 1	0.655063	0.987246	2.571
GO:0009880	embryonic pattern specification	AK235345.1	Sus scrofa mRNA, clone:OVRM10071B07, expressed in ovary		NM_004529.2	4300	MLLT3	myeloid/lymphoid or mixed-lineage leukemia (trithorax homolog, Drosophila); translocated to, 3	0.655063	0.987246	2.571
GO:0008630	DNA damage response, signal transduction resulting in induction of apoptosis	AK232555.1	Sus scrofa mRNA, clone:LVR010073A12, expressed in liver		NM_004208.2	9131	AIFM1	apoptosis-inducing factor, mitochondrion-associated, 1	0.655063	0.987246	2.571
GO:0006914	autophagy	AK240181.1	Sus scrofa mRNA, clone:UTR010038F11, expressed in uterus		NM_032514.2	84557	MAP1LC3A	microtubule-associated protein 1 light chain 3 alpha	0.655063	0.987246	2.571
GO:0046661	male sex differentiation	BX672955	BX672955 Sus Scrofa library (scac) Sus scrofa cDNA clone scac0044.o.04 5prim, mRNA sequence						0.655063	0.987246	2.571
GO:0051297	centrosome organization	DN132970	996409 MARC 4PIG Sus scrofa cDNA 5', mRNA sequence						0.655063	0.987246	2.571
GO:0006890	retrograde vesicle-mediated transport, Golgi to ER	DR120938	COG3c1 Pig pBluescript and pTrueBlue library Sus scrofa cDNA 5', mRNA sequence						0.655063	0.987246	2.571
GO:0006350	transcription	AK231556.1	Sus scrofa mRNA, clone:ITT010093E05, expressed in intestine		NM_004506.3	3298	HSF2	heat shock transcription factor 2	0.656074	0.987266	0.659232
GO:0006350	transcription	AK236398.1	Sus scrofa mRNA, clone:OVRM10188F03, expressed in ovary		AM746459.1	440400	RNASEK	ribonuclease, RNase K	0.656074	0.987266	0.659232
GO:0006350	transcription	BX914521	BX914521 Sus Scrofa library (scan) Sus scrofa cDNA clone scan0001.d.06 5prim, mRNA sequence						0.656074	0.987266	0.659232
GO:0002684	positive regulation of immune system process	CN164178	994302 MARC 4PIG Sus scrofa cDNA 5', mRNA sequence						0.669771	0.987523	0.443277
GO:0010648	negative regulation of cell communication	BE014011	125574 MARC 1PIG Sus scrofa cDNA 5', mRNA sequence						0.669771	0.987523	0.443277
GO:0009968	negative regulation of signal transduction	BE014011	125574 MARC 1PIG Sus scrofa cDNA 5', mRNA sequence						0.669771	0.987523	0.443277
GO:0030154	cell differentiation	AK233000.1	Sus scrofa mRNA, clone:LVRM10065H01, expressed in liver		BC028234.1	8775	NAPA	N-ethylmaleimide-sensitive factor attachment protein, alpha	0.674554	0.98761	0.847584
GO:0030154	cell differentiation	AF329358.1	Sus scrofa laminin beta-1 chain mRNA, partial cds	LAMB1	NM_002291.2	3912	LAMB1	laminin, beta 1	0.674554	0.98761	0.847584
GO:0030154	cell differentiation	BP143486	BP143486 full-length enriched swine cDNA library, adult ovary Sus scrofa cDNA clone OVR010017F01 5', mRNA sequence						0.674554	0.98761	0.847584
GO:0030154	cell differentiation	CK449659	893247 MARC 4PIG Sus scrofa cDNA 5', mRNA sequence						0.674554	0.98761	0.847584
GO:0030154	cell differentiation	BX923548	BX923548 Sus Scrofa library (scan) Sus scrofa cDNA clone scan0012.k.22 5prim, mRNA sequence						0.674554	0.98761	0.847584
GO:0030154	cell differentiation	BX925993	BX925993 Sus Scrofa library (scan) Sus scrofa cDNA clone scan0021.f.19 5prim, mRNA sequence						0.674554	0.98761	0.847584
GO:0030154	cell differentiation	DN112655	1111858 MARC 4PIG Sus scrofa cDNA 3', mRNA sequence						0.674554	0.98761	0.847584
GO:0030154	cell differentiation	DN120593	1120622 MARC 4PIG Sus scrofa cDNA 5', mRNA sequence						0.674554	0.98761	0.847584
GO:0030154	cell differentiation	DV904076	POSM0605028_M02R porcine skeletal muscle cDNA library (PoSM) Sus scrofa cDNA 3', mRNA sequence						0.674554	0.98761	0.847584
GO:0030154	cell differentiation	CX057037	PDUts2009C04 Porcine testis cDNA library II Sus scrofa cDNA clone PDUts2009C04 5' similar to homologue to ref|NM_017826.1| Homo sapiens hypothetical protein FLJ20449 (FLJ20449), mRNA, mRNA sequence						0.674554	0.98761	0.847584
GO:0030154	cell differentiation	EV867707	rpbfe0123_n8.y1 bfe Sus scrofa cDNA 5', mRNA sequence						0.674554	0.98761	0.847584
GO:0030154	cell differentiation	EW088403	recc2833c_i12.y1 ecc Sus scrofa cDNA 5', mRNA sequence						0.674554	0.98761	0.847584
GO:0006139	nucleobase, nucleoside, nucleotide and nucleic acid metabolic process	AK234461.1	Sus scrofa mRNA, clone:OVR010067A09, expressed in ovary		NM_006107.3	51747	LUC7L3	LUC7-like 3 (S. cerevisiae)	0.677306	0.98766	0.901474
GO:0006139	nucleobase, nucleoside, nucleotide and nucleic acid metabolic process	AK237695.1	Sus scrofa mRNA, clone:SPL010081H01, expressed in spleen		BC053635.1	8602	NOP14	NOP14 nucleolar protein homolog (yeast)	0.677306	0.98766	0.901474
GO:0006139	nucleobase, nucleoside, nucleotide and nucleic acid metabolic process	AK234932.1	Sus scrofa mRNA, clone:OVRM10033G12, expressed in ovary		AK311348.1	2189	FANCG	Fanconi anemia, complementation group G	0.677306	0.98766	0.901474
GO:0006139	nucleobase, nucleoside, nucleotide and nucleic acid metabolic process	AK231556.1	Sus scrofa mRNA, clone:ITT010093E05, expressed in intestine		NM_004506.3	3298	HSF2	heat shock transcription factor 2	0.677306	0.98766	0.901474
GO:0006139	nucleobase, nucleoside, nucleotide and nucleic acid metabolic process	AK232555.1	Sus scrofa mRNA, clone:LVR010073A12, expressed in liver		NM_004208.2	9131	AIFM1	apoptosis-inducing factor, mitochondrion-associated, 1	0.677306	0.98766	0.901474
GO:0006139	nucleobase, nucleoside, nucleotide and nucleic acid metabolic process	AK236127.1	Sus scrofa mRNA, clone:OVRM10155A01, expressed in ovary		NM_001135654.1	8761	PABPC4	poly(A) binding protein, cytoplasmic 4 (inducible form)	0.677306	0.98766	0.901474
GO:0006139	nucleobase, nucleoside, nucleotide and nucleic acid metabolic process	AK236182.1	Sus scrofa mRNA, clone:OVRM10161E01, expressed in ovary		NM_005006.5	4719	NDUFS1	NADH dehydrogenase (ubiquinone) Fe-S protein 1, 75kDa (NADH-coenzyme Q reductase)	0.677306	0.98766	0.901474
GO:0006139	nucleobase, nucleoside, nucleotide and nucleic acid metabolic process	AK230569.1	Sus scrofa mRNA, clone:AMP010010H06, expressed in alveolar macrophage	----	NM_001358.2	1665	DHX15	DEAH (Asp-Glu-Ala-His) box polypeptide 15	0.677306	0.98766	0.901474
GO:0006139	nucleobase, nucleoside, nucleotide and nucleic acid metabolic process	AK236398.1	Sus scrofa mRNA, clone:OVRM10188F03, expressed in ovary		AM746459.1	440400	RNASEK	ribonuclease, RNase K	0.677306	0.98766	0.901474
GO:0006139	nucleobase, nucleoside, nucleotide and nucleic acid metabolic process	AK236404.1	Sus scrofa mRNA, clone:OVRM10189A09, expressed in ovary		AK297127.1	11100	HNRNPUL1	heterogeneous nuclear ribonucleoprotein U-like 1	0.677306	0.98766	0.901474
GO:0006139	nucleobase, nucleoside, nucleotide and nucleic acid metabolic process	AK236416.1	Sus scrofa mRNA, clone:OVRM10189H07, expressed in ovary		NM_001071.2	7298	TYMS	thymidylate synthetase	0.677306	0.98766	0.901474
GO:0006139	nucleobase, nucleoside, nucleotide and nucleic acid metabolic process	AK239611.1	Sus scrofa mRNA, clone:THY010116E05, expressed in thymus		NR_003249.1	9987	HNRPDL	heterogeneous nuclear ribonucleoprotein D-like	0.677306	0.98766	0.901474
GO:0006139	nucleobase, nucleoside, nucleotide and nucleic acid metabolic process	AK239756.1	Sus scrofa mRNA, clone:THY010202F01, expressed in thymus		BC004465.1	54386	TERF2IP	telomeric repeat binding factor 2, interacting protein	0.677306	0.98766	0.901474
GO:0006139	nucleobase, nucleoside, nucleotide and nucleic acid metabolic process	AK233382.1	Sus scrofa mRNA, clone:LVRM10136B04, expressed in liver		CR594689.1	7884	SLBP	stem-loop binding protein	0.677306	0.98766	0.901474
GO:0006139	nucleobase, nucleoside, nucleotide and nucleic acid metabolic process	AK233966.1	Sus scrofa mRNA, clone:MLN010082C02, expressed in mesenteric lymph node		BC107696.1	56915	EXOSC5	exosome component 5	0.677306	0.98766	0.901474
GO:0006139	nucleobase, nucleoside, nucleotide and nucleic acid metabolic process	AY609798.1	Sus scrofa clone Clu_3164.scr.msk.p1.Contig1, mRNA sequence		AK290334.1	51319	RSRC1	arginine/serine-rich coiled-coil 1	0.677306	0.98766	0.901474
GO:0006139	nucleobase, nucleoside, nucleotide and nucleic acid metabolic process	AY610031.1	Sus scrofa clone Clu_58583.scr.msk.p1.Contig3, mRNA sequence		NM_003616.2	8487	SIP1	survival of motor neuron protein interacting protein 1	0.677306	0.98766	0.901474
GO:0006139	nucleobase, nucleoside, nucleotide and nucleic acid metabolic process	BX664880	BX664880 Sus Scrofa library (scag) Sus scrofa cDNA clone scag0005.d.07 5prim, mRNA sequence						0.677306	0.98766	0.901474
GO:0006139	nucleobase, nucleoside, nucleotide and nucleic acid metabolic process	BX667682	BX667682 Sus Scrofa library (scac) Sus scrofa cDNA clone scac0026.g.10 5prim, mRNA sequence						0.677306	0.98766	0.901474
GO:0006139	nucleobase, nucleoside, nucleotide and nucleic acid metabolic process	BX914521	BX914521 Sus Scrofa library (scan) Sus scrofa cDNA clone scan0001.d.06 5prim, mRNA sequence						0.677306	0.98766	0.901474
GO:0006139	nucleobase, nucleoside, nucleotide and nucleic acid metabolic process	BX918412	BX918412 Sus Scrofa library (scan) Sus scrofa cDNA clone scan0038.i.09 5prim, mRNA sequence						0.677306	0.98766	0.901474
GO:0006139	nucleobase, nucleoside, nucleotide and nucleic acid metabolic process	CN164178	994302 MARC 4PIG Sus scrofa cDNA 5', mRNA sequence						0.677306	0.98766	0.901474
GO:0006139	nucleobase, nucleoside, nucleotide and nucleic acid metabolic process	CJ011361	CJ011361 full-length enriched swine cDNA library, adult mesenteric lymph node Sus scrofa cDNA clone MLN01D120048 5', mRNA sequence						0.677306	0.98766	0.901474
GO:0006139	nucleobase, nucleoside, nucleotide and nucleic acid metabolic process	AJ950507	AJ950507 KN404_1 Sus scrofa cDNA clone C0007741i12 5', mRNA sequence						0.677306	0.98766	0.901474
GO:0006139	nucleobase, nucleoside, nucleotide and nucleic acid metabolic process	CA779561	MPL384_12_P03 MPL Sus scrofa cDNA clone pSPORT1 5', mRNA sequence						0.677306	0.98766	0.901474
GO:0006364	rRNA processing	AK237695.1	Sus scrofa mRNA, clone:SPL010081H01, expressed in spleen		BC053635.1	8602	NOP14	NOP14 nucleolar protein homolog (yeast)	0.681884	0.987742	1.65871
GO:0006364	rRNA processing	AK233966.1	Sus scrofa mRNA, clone:MLN010082C02, expressed in mesenteric lymph node		BC107696.1	56915	EXOSC5	exosome component 5	0.681884	0.987742	1.65871
GO:0048534	hemopoietic or lymphoid organ development	AK230559.1	Sus scrofa mRNA, clone:AMP010010A02, expressed in alveolar macrophage	----	BC064357.1	8301	PICALM	phosphatidylinositol binding clathrin assembly protein	0.688493	0.987858	0.451053
GO:0000122	negative regulation of transcription from RNA polymerase II promoter	CK467896	939242 MARC 4PIG Sus scrofa cDNA 5', mRNA sequence						0.688493	0.987858	0.451053
GO:0002252	immune effector process	CN164178	994302 MARC 4PIG Sus scrofa cDNA 5', mRNA sequence						0.688493	0.987858	0.451053
GO:0006644	phospholipid metabolic process	BE235135	142484 MARC 1PIG Sus scrofa cDNA 5', mRNA sequence						0.688493	0.987858	0.451053
GO:0009059	macromolecule biosynthetic process	AK231556.1	Sus scrofa mRNA, clone:ITT010093E05, expressed in intestine		NM_004506.3	3298	HSF2	heat shock transcription factor 2	0.689907	0.987883	0.852267
GO:0009059	macromolecule biosynthetic process	AK238836.1	Sus scrofa mRNA, clone:THY010035H09, expressed in thymus		NM_031992.1	7458	EIF4H	eukaryotic translation initiation factor 4H	0.689907	0.987883	0.852267
GO:0009059	macromolecule biosynthetic process	AK236028.1	Sus scrofa mRNA, clone:OVRM10140A03, expressed in ovary		AY358465.1	11253	MAN1B1	mannosidase, alpha, class 1B, member 1	0.689907	0.987883	0.852267
GO:0009059	macromolecule biosynthetic process	AK236127.1	Sus scrofa mRNA, clone:OVRM10155A01, expressed in ovary		NM_001135654.1	8761	PABPC4	poly(A) binding protein, cytoplasmic 4 (inducible form)	0.689907	0.987883	0.852267
GO:0009059	macromolecule biosynthetic process	AK236398.1	Sus scrofa mRNA, clone:OVRM10188F03, expressed in ovary		AM746459.1	440400	RNASEK	ribonuclease, RNase K	0.689907	0.987883	0.852267
GO:0009059	macromolecule biosynthetic process	AK236416.1	Sus scrofa mRNA, clone:OVRM10189H07, expressed in ovary		NM_001071.2	7298	TYMS	thymidylate synthetase	0.689907	0.987883	0.852267
GO:0009059	macromolecule biosynthetic process	AK239756.1	Sus scrofa mRNA, clone:THY010202F01, expressed in thymus		BC004465.1	54386	TERF2IP	telomeric repeat binding factor 2, interacting protein	0.689907	0.987883	0.852267
GO:0009059	macromolecule biosynthetic process	BX914521	BX914521 Sus Scrofa library (scan) Sus scrofa cDNA clone scan0001.d.06 5prim, mRNA sequence						0.689907	0.987883	0.852267
GO:0009059	macromolecule biosynthetic process	BX918412	BX918412 Sus Scrofa library (scan) Sus scrofa cDNA clone scan0038.i.09 5prim, mRNA sequence						0.689907	0.987883	0.852267
GO:0009059	macromolecule biosynthetic process	DN123551	1123855 MARC 4PIG Sus scrofa cDNA 5', mRNA sequence						0.689907	0.987883	0.852267
GO:0009059	macromolecule biosynthetic process	DR120938	COG3c1 Pig pBluescript and pTrueBlue library Sus scrofa cDNA 5', mRNA sequence						0.689907	0.987883	0.852267
GO:0009059	macromolecule biosynthetic process	EV928670	rche13_i19.y1 che Sus scrofa cDNA 5', mRNA sequence						0.689907	0.987883	0.852267
GO:0032879	regulation of localization	AF329358.1	Sus scrofa laminin beta-1 chain mRNA, partial cds	LAMB1	NM_002291.2	3912	LAMB1	laminin, beta 1	0.696023	0.987988	0.67658
GO:0032879	regulation of localization	BX923548	BX923548 Sus Scrofa library (scan) Sus scrofa cDNA clone scan0012.k.22 5prim, mRNA sequence						0.696023	0.987988	0.67658
GO:0032879	regulation of localization	EW158560	reye1608b_e17.y1 eye Sus scrofa cDNA 5', mRNA sequence						0.696023	0.987988	0.67658
GO:0051093	negative regulation of developmental process	AK235171.1	Sus scrofa mRNA, clone:OVRM10055D04, expressed in ovary		AF087894.1	23564	DDAH2	dimethylarginine dimethylaminohydrolase 2	0.696999	0.988004	0.724227
GO:0051093	negative regulation of developmental process	AK235751.1	Sus scrofa mRNA, clone:OVRM10111E07, expressed in ovary		NM_004323.4	573	BAG1	BCL2-associated athanogene	0.696999	0.988004	0.724227
GO:0051093	negative regulation of developmental process	DN120593	1120622 MARC 4PIG Sus scrofa cDNA 5', mRNA sequence						0.696999	0.988004	0.724227
GO:0051093	negative regulation of developmental process	DN123606	1123919 MARC 4PIG Sus scrofa cDNA 5', mRNA sequence						0.696999	0.988004	0.724227
GO:0048193	Golgi vesicle transport	BX666658	BX666658 Sus Scrofa library (scac) Sus scrofa cDNA clone scac0025.d.07 3prim, mRNA sequence						0.701983	0.988089	1.42834
GO:0048193	Golgi vesicle transport	CK454638	915131 MARC 4PIG Sus scrofa cDNA 5', mRNA sequence						0.701983	0.988089	1.42834
GO:0048193	Golgi vesicle transport	DR120938	COG3c1 Pig pBluescript and pTrueBlue library Sus scrofa cDNA 5', mRNA sequence						0.701983	0.988089	1.42834
GO:0006519	cellular amino acid and derivative metabolic process	AK240417.1	Sus scrofa mRNA, clone:UTR010066E08, expressed in uterus		AB073609.1	55256	ADI1	acireductone dioxygenase 1	0.703129	0.988108	1.33559
GO:0006519	cellular amino acid and derivative metabolic process	AK235171.1	Sus scrofa mRNA, clone:OVRM10055D04, expressed in ovary		AF087894.1	23564	DDAH2	dimethylarginine dimethylaminohydrolase 2	0.703129	0.988108	1.33559
GO:0006519	cellular amino acid and derivative metabolic process	AK231755.1	Sus scrofa mRNA, clone:LNG010019G08, expressed in lung		BC008723.2	440	ASNS	asparagine synthetase	0.703129	0.988108	1.33559
GO:0006519	cellular amino acid and derivative metabolic process	EW290234	rjej38b_p21.y1 jej Sus scrofa cDNA 5', mRNA sequence						0.703129	0.988108	1.33559
GO:0006996	organelle organization	AK237695.1	Sus scrofa mRNA, clone:SPL010081H01, expressed in spleen		BC053635.1	8602	NOP14	NOP14 nucleolar protein homolog (yeast)	0.7053	0.988144	0.863645
GO:0006996	organelle organization	AK234932.1	Sus scrofa mRNA, clone:OVRM10033G12, expressed in ovary		AK311348.1	2189	FANCG	Fanconi anemia, complementation group G	0.7053	0.988144	0.863645
GO:0006996	organelle organization	AK232555.1	Sus scrofa mRNA, clone:LVR010073A12, expressed in liver		NM_004208.2	9131	AIFM1	apoptosis-inducing factor, mitochondrion-associated, 1	0.7053	0.988144	0.863645
GO:0006996	organelle organization	AK239756.1	Sus scrofa mRNA, clone:THY010202F01, expressed in thymus		BC004465.1	54386	TERF2IP	telomeric repeat binding factor 2, interacting protein	0.7053	0.988144	0.863645
GO:0006996	organelle organization	AK237149.1	Sus scrofa mRNA, clone:SPL010004H09, expressed in spleen		AK092008.1	54892	NCAPG2	non-SMC condensin II complex, subunit G2	0.7053	0.988144	0.863645
GO:0006996	organelle organization	AK240181.1	Sus scrofa mRNA, clone:UTR010038F11, expressed in uterus		NM_032514.2	84557	MAP1LC3A	microtubule-associated protein 1 light chain 3 alpha	0.7053	0.988144	0.863645
GO:0006996	organelle organization	AK233966.1	Sus scrofa mRNA, clone:MLN010082C02, expressed in mesenteric lymph node		BC107696.1	56915	EXOSC5	exosome component 5	0.7053	0.988144	0.863645
GO:0006996	organelle organization	AY610394.1	Sus scrofa clone reru31c_i7.y1.abd, mRNA sequence		NM_002495.2	4724	NDUFS4	NADH dehydrogenase (ubiquinone) Fe-S protein 4, 18kDa (NADH-coenzyme Q reductase)	0.7053	0.988144	0.863645
GO:0006996	organelle organization	CK452762	908422 MARC 4PIG Sus scrofa cDNA 5', mRNA sequence						0.7053	0.988144	0.863645
GO:0006996	organelle organization	BX918412	BX918412 Sus Scrofa library (scan) Sus scrofa cDNA clone scan0038.i.09 5prim, mRNA sequence						0.7053	0.988144	0.863645
GO:0006996	organelle organization	DN132970	996409 MARC 4PIG Sus scrofa cDNA 5', mRNA sequence						0.7053	0.988144	0.863645
GO:0006996	organelle organization	EV867707	rpbfe0123_n8.y1 bfe Sus scrofa cDNA 5', mRNA sequence						0.7053	0.988144	0.863645
GO:0006996	organelle organization	EW421594	rnca11b_e13.y1 nca Sus scrofa cDNA 5', mRNA sequence						0.7053	0.988144	0.863645
GO:0034645	cellular macromolecule biosynthetic process	AK231556.1	Sus scrofa mRNA, clone:ITT010093E05, expressed in intestine		NM_004506.3	3298	HSF2	heat shock transcription factor 2	0.705447	0.988146	0.857002
GO:0034645	cellular macromolecule biosynthetic process	AK238836.1	Sus scrofa mRNA, clone:THY010035H09, expressed in thymus		NM_031992.1	7458	EIF4H	eukaryotic translation initiation factor 4H	0.705447	0.988146	0.857002
GO:0034645	cellular macromolecule biosynthetic process	AK236028.1	Sus scrofa mRNA, clone:OVRM10140A03, expressed in ovary		AY358465.1	11253	MAN1B1	mannosidase, alpha, class 1B, member 1	0.705447	0.988146	0.857002
GO:0034645	cellular macromolecule biosynthetic process	AK236127.1	Sus scrofa mRNA, clone:OVRM10155A01, expressed in ovary		NM_001135654.1	8761	PABPC4	poly(A) binding protein, cytoplasmic 4 (inducible form)	0.705447	0.988146	0.857002
GO:0034645	cellular macromolecule biosynthetic process	AK236398.1	Sus scrofa mRNA, clone:OVRM10188F03, expressed in ovary		AM746459.1	440400	RNASEK	ribonuclease, RNase K	0.705447	0.988146	0.857002
GO:0034645	cellular macromolecule biosynthetic process	AK236416.1	Sus scrofa mRNA, clone:OVRM10189H07, expressed in ovary		NM_001071.2	7298	TYMS	thymidylate synthetase	0.705447	0.988146	0.857002
GO:0034645	cellular macromolecule biosynthetic process	AK239756.1	Sus scrofa mRNA, clone:THY010202F01, expressed in thymus		BC004465.1	54386	TERF2IP	telomeric repeat binding factor 2, interacting protein	0.705447	0.988146	0.857002
GO:0034645	cellular macromolecule biosynthetic process	BX914521	BX914521 Sus Scrofa library (scan) Sus scrofa cDNA clone scan0001.d.06 5prim, mRNA sequence						0.705447	0.988146	0.857002
GO:0034645	cellular macromolecule biosynthetic process	BX918412	BX918412 Sus Scrofa library (scan) Sus scrofa cDNA clone scan0038.i.09 5prim, mRNA sequence						0.705447	0.988146	0.857002
GO:0034645	cellular macromolecule biosynthetic process	DN123551	1123855 MARC 4PIG Sus scrofa cDNA 5', mRNA sequence						0.705447	0.988146	0.857002
GO:0034645	cellular macromolecule biosynthetic process	DR120938	COG3c1 Pig pBluescript and pTrueBlue library Sus scrofa cDNA 5', mRNA sequence						0.705447	0.988146	0.857002
GO:0034645	cellular macromolecule biosynthetic process	EV928670	rche13_i19.y1 che Sus scrofa cDNA 5', mRNA sequence						0.705447	0.988146	0.857002
GO:0042391	regulation of membrane potential	AK236182.1	Sus scrofa mRNA, clone:OVRM10161E01, expressed in ovary		NM_005006.5	4719	NDUFS1	NADH dehydrogenase (ubiquinone) Fe-S protein 1, 75kDa (NADH-coenzyme Q reductase)	0.707398	0.988179	2.33728
GO:0006334	nucleosome assembly	BX918412	BX918412 Sus Scrofa library (scan) Sus scrofa cDNA clone scan0038.i.09 5prim, mRNA sequence						0.707398	0.988179	2.33728
GO:0001952	regulation of cell-matrix adhesion	DN120593	1120622 MARC 4PIG Sus scrofa cDNA 5', mRNA sequence						0.707398	0.988179	2.33728
GO:0045767	regulation of anti-apoptosis	DN120593	1120622 MARC 4PIG Sus scrofa cDNA 5', mRNA sequence						0.707398	0.988179	2.33728
GO:0032271	regulation of protein polymerization	DN120593	1120622 MARC 4PIG Sus scrofa cDNA 5', mRNA sequence						0.707398	0.988179	2.33728
GO:0043524	negative regulation of neuron apoptosis	DN120593	1120622 MARC 4PIG Sus scrofa cDNA 5', mRNA sequence						0.707398	0.988179	2.33728
GO:0033500	carbohydrate homeostasis	EW357862	rlyg24_g14.y1 lyg Sus scrofa cDNA 5', mRNA sequence						0.707398	0.988179	2.33728
GO:0042593	glucose homeostasis	EW357862	rlyg24_g14.y1 lyg Sus scrofa cDNA 5', mRNA sequence						0.707398	0.988179	2.33728
GO:0016072	rRNA metabolic process	AK237695.1	Sus scrofa mRNA, clone:SPL010081H01, expressed in spleen		BC053635.1	8602	NOP14	NOP14 nucleolar protein homolog (yeast)	0.710437	0.988229	1.60688
GO:0009952	anterior/posterior pattern formation	AK235345.1	Sus scrofa mRNA, clone:OVRM10071B07, expressed in ovary		NM_004529.2	4300	MLLT3	myeloid/lymphoid or mixed-lineage leukemia (trithorax homolog, Drosophila); translocated to, 3	0.710437	0.988229	1.60688
GO:0016072	rRNA metabolic process	AK233966.1	Sus scrofa mRNA, clone:MLN010082C02, expressed in mesenteric lymph node		BC107696.1	56915	EXOSC5	exosome component 5	0.710437	0.988229	1.60688
GO:0009952	anterior/posterior pattern formation	EW417768	rnbm12b_c21.y1 nbm Sus scrofa cDNA 5', mRNA sequence						0.710437	0.988229	1.60688
GO:0001558	regulation of cell growth	AY609666.1	Sus scrofa clone Clu_24219.scr.msk.p1.Contig4, mRNA sequence		NM_016041.3	51009	DERL2	Der1-like domain family, member 2	0.720937	0.988398	1.31846
GO:0001558	regulation of cell growth	DV904076	POSM0605028_M02R porcine skeletal muscle cDNA library (PoSM) Sus scrofa cDNA 3', mRNA sequence						0.720937	0.988398	1.31846
GO:0001558	regulation of cell growth	EW421594	rnca11b_e13.y1 nca Sus scrofa cDNA 5', mRNA sequence						0.720937	0.988398	1.31846
GO:0001558	regulation of cell growth	BE235135	142484 MARC 1PIG Sus scrofa cDNA 5', mRNA sequence						0.720937	0.988398	1.31846
GO:0044248	cellular catabolic process	AK235171.1	Sus scrofa mRNA, clone:OVRM10055D04, expressed in ovary		AF087894.1	23564	DDAH2	dimethylarginine dimethylaminohydrolase 2	0.727945	0.988509	1.1148
GO:0044248	cellular catabolic process	AK235390.1	Sus scrofa mRNA, clone:OVRM10075G05, expressed in ovary		AK291935.1	118424	UBE2J2	ubiquitin-conjugating enzyme E2, J2 (UBC6 homolog, yeast)	0.727945	0.988509	1.1148
GO:0044248	cellular catabolic process	AK232555.1	Sus scrofa mRNA, clone:LVR010073A12, expressed in liver		NM_004208.2	9131	AIFM1	apoptosis-inducing factor, mitochondrion-associated, 1	0.727945	0.988509	1.1148
GO:0044248	cellular catabolic process	AK236127.1	Sus scrofa mRNA, clone:OVRM10155A01, expressed in ovary		NM_001135654.1	8761	PABPC4	poly(A) binding protein, cytoplasmic 4 (inducible form)	0.727945	0.988509	1.1148
GO:0044248	cellular catabolic process	AK236324.1	Sus scrofa mRNA, clone:OVRM10181E04, expressed in ovary		BC000439.2	5162	PDHB	pyruvate dehydrogenase (lipoamide) beta	0.727945	0.988509	1.1148
GO:0044248	cellular catabolic process	AK239600.1	Sus scrofa mRNA, clone:THY010115C09, expressed in thymus		AK291127.1	1632	DCI	dodecenoyl-Coenzyme A delta isomerase (3,2 trans-enoyl-Coenzyme A isomerase)	0.727945	0.988509	1.1148
GO:0044248	cellular catabolic process	AK240181.1	Sus scrofa mRNA, clone:UTR010038F11, expressed in uterus		NM_032514.2	84557	MAP1LC3A	microtubule-associated protein 1 light chain 3 alpha	0.727945	0.988509	1.1148
GO:0044248	cellular catabolic process	AY609666.1	Sus scrofa clone Clu_24219.scr.msk.p1.Contig4, mRNA sequence		NM_016041.3	51009	DERL2	Der1-like domain family, member 2	0.727945	0.988509	1.1148
GO:0044248	cellular catabolic process	BX664880	BX664880 Sus Scrofa library (scag) Sus scrofa cDNA clone scag0005.d.07 5prim, mRNA sequence						0.727945	0.988509	1.1148
GO:0044248	cellular catabolic process	BX665103	BX665103 Sus Scrofa library (scag) Sus scrofa cDNA clone scag0004.c.03 5prim, mRNA sequence						0.727945	0.988509	1.1148
GO:0044248	cellular catabolic process	BX915041	BX915041 Sus Scrofa library (scan) Sus scrofa cDNA clone scan0027.c.13 5prim, mRNA sequence						0.727945	0.988509	1.1148
GO:0044248	cellular catabolic process	CJ012192	CJ012192 full-length enriched swine cDNA library, adult mesenteric lymph node Sus scrofa cDNA clone MLN01B080058 5', mRNA sequence						0.727945	0.988509	1.1148
GO:0044248	cellular catabolic process	AJ944603	AJ944603 CSEQRAN17 Sus scrofa cDNA clone C0007304f23 5', mRNA sequence						0.727945	0.988509	1.1148
GO:0044248	cellular catabolic process	DY406584	1498188 MARC 3PIG Sus scrofa cDNA 5', mRNA sequence						0.727945	0.988509	1.1148
GO:0044248	cellular catabolic process	AK236389	Sus scrofa mRNA, clone:OVRM10187H12, expressed in ovary	EPHX1	NM_000120.3	2052	EPHX1	epoxide hydrolase 1, microsomal (xenobiotic)	0.727945	0.988509	1.1148
GO:0044248	cellular catabolic process	EV890051	rcad06b_b19.y1 cag Sus scrofa cDNA 5', mRNA sequence						0.727945	0.988509	1.1148
GO:0006486	protein amino acid glycosylation	AK236028.1	Sus scrofa mRNA, clone:OVRM10140A03, expressed in ovary		AY358465.1	11253	MAN1B1	mannosidase, alpha, class 1B, member 1	0.738765	0.988675	1.55818
GO:0070085	glycosylation	AK236028.1	Sus scrofa mRNA, clone:OVRM10140A03, expressed in ovary		AY358465.1	11253	MAN1B1	mannosidase, alpha, class 1B, member 1	0.738765	0.988675	1.55818
GO:0008015	blood circulation	BX667682	BX667682 Sus Scrofa library (scac) Sus scrofa cDNA clone scac0026.g.10 5prim, mRNA sequence						0.738765	0.988675	1.55818
GO:0003013	circulatory system process	BX667682	BX667682 Sus Scrofa library (scac) Sus scrofa cDNA clone scac0026.g.10 5prim, mRNA sequence						0.738765	0.988675	1.55818
GO:0003013	circulatory system process	DV904076	POSM0605028_M02R porcine skeletal muscle cDNA library (PoSM) Sus scrofa cDNA 3', mRNA sequence						0.738765	0.988675	1.55818
GO:0008015	blood circulation	DV904076	POSM0605028_M02R porcine skeletal muscle cDNA library (PoSM) Sus scrofa cDNA 3', mRNA sequence						0.738765	0.988675	1.55818
GO:0070085	glycosylation	DR120938	COG3c1 Pig pBluescript and pTrueBlue library Sus scrofa cDNA 5', mRNA sequence						0.738765	0.988675	1.55818
GO:0006486	protein amino acid glycosylation	DR120938	COG3c1 Pig pBluescript and pTrueBlue library Sus scrofa cDNA 5', mRNA sequence						0.738765	0.988675	1.55818
GO:0009887	organ morphogenesis	AF329358.1	Sus scrofa laminin beta-1 chain mRNA, partial cds	LAMB1	NM_002291.2	3912	LAMB1	laminin, beta 1	0.746349	0.988789	1.21465
GO:0009887	organ morphogenesis	BX923548	BX923548 Sus Scrofa library (scan) Sus scrofa cDNA clone scan0012.k.22 5prim, mRNA sequence						0.746349	0.988789	1.21465
GO:0009887	organ morphogenesis	DN120593	1120622 MARC 4PIG Sus scrofa cDNA 5', mRNA sequence						0.746349	0.988789	1.21465
GO:0009887	organ morphogenesis	DV904076	POSM0605028_M02R porcine skeletal muscle cDNA library (PoSM) Sus scrofa cDNA 3', mRNA sequence						0.746349	0.988789	1.21465
GO:0009887	organ morphogenesis	EW088403	recc2833c_i12.y1 ecc Sus scrofa cDNA 5', mRNA sequence						0.746349	0.988789	1.21465
GO:0009887	organ morphogenesis	EW417768	rnbm12b_c21.y1 nbm Sus scrofa cDNA 5', mRNA sequence						0.746349	0.988789	1.21465
GO:0030097	hemopoiesis	AK230559.1	Sus scrofa mRNA, clone:AMP010010A02, expressed in alveolar macrophage	----	BC064357.1	8301	PICALM	phosphatidylinositol binding clathrin assembly protein	0.747165	0.988801	0.476112
GO:0002682	regulation of immune system process	CK454638	915131 MARC 4PIG Sus scrofa cDNA 5', mRNA sequence						0.753444	0.988893	0.627074
GO:0002682	regulation of immune system process	CN164178	994302 MARC 4PIG Sus scrofa cDNA 5', mRNA sequence						0.753444	0.988893	0.627074
GO:0048522	positive regulation of cellular process	AK232555.1	Sus scrofa mRNA, clone:LVR010073A12, expressed in liver		NM_004208.2	9131	AIFM1	apoptosis-inducing factor, mitochondrion-associated, 1	0.756355	0.988935	0.897476
GO:0048522	positive regulation of cellular process	AF329358.1	Sus scrofa laminin beta-1 chain mRNA, partial cds	LAMB1	NM_002291.2	3912	LAMB1	laminin, beta 1	0.756355	0.988935	0.897476
GO:0048522	positive regulation of cellular process	AY609666.1	Sus scrofa clone Clu_24219.scr.msk.p1.Contig4, mRNA sequence		NM_016041.3	51009	DERL2	Der1-like domain family, member 2	0.756355	0.988935	0.897476
GO:0048522	positive regulation of cellular process	AY610394.1	Sus scrofa clone reru31c_i7.y1.abd, mRNA sequence		NM_002495.2	4724	NDUFS4	NADH dehydrogenase (ubiquinone) Fe-S protein 4, 18kDa (NADH-coenzyme Q reductase)	0.756355	0.988935	0.897476
GO:0048522	positive regulation of cellular process	CK467405	938702 MARC 4PIG Sus scrofa cDNA 5', mRNA sequence						0.756355	0.988935	0.897476
GO:0048522	positive regulation of cellular process	BX915041	BX915041 Sus Scrofa library (scan) Sus scrofa cDNA clone scan0027.c.13 5prim, mRNA sequence						0.756355	0.988935	0.897476
GO:0048522	positive regulation of cellular process	BX918412	BX918412 Sus Scrofa library (scan) Sus scrofa cDNA clone scan0038.i.09 5prim, mRNA sequence						0.756355	0.988935	0.897476
GO:0048522	positive regulation of cellular process	BX923548	BX923548 Sus Scrofa library (scan) Sus scrofa cDNA clone scan0012.k.22 5prim, mRNA sequence						0.756355	0.988935	0.897476
GO:0048522	positive regulation of cellular process	CN158607	947410 MARC 4PIG Sus scrofa cDNA 5', mRNA sequence						0.756355	0.988935	0.897476
GO:0048522	positive regulation of cellular process	CN164178	994302 MARC 4PIG Sus scrofa cDNA 5', mRNA sequence						0.756355	0.988935	0.897476
GO:0048522	positive regulation of cellular process	DN121268	1121355 MARC 4PIG Sus scrofa cDNA 3', mRNA sequence						0.756355	0.988935	0.897476
GO:0048522	positive regulation of cellular process	DT324183	SusFleck_BF_0033_0036_5_pCNS_D01 SusFleck Backfat Sus scrofa cDNA clone 0033_0036_D01 5', mRNA sequence						0.756355	0.988935	0.897476
GO:0048522	positive regulation of cellular process	EW222667	rgul0130_k18.y1 gul Sus scrofa cDNA 5', mRNA sequence						0.756355	0.988935	0.897476
GO:0048522	positive regulation of cellular process	EW421594	rnca11b_e13.y1 nca Sus scrofa cDNA 5', mRNA sequence						0.756355	0.988935	0.897476
GO:0048522	positive regulation of cellular process	EW464984	rnmm24c_m17.y1 nmm Sus scrofa cDNA 5', mRNA sequence						0.756355	0.988935	0.897476
GO:0048522	positive regulation of cellular process	BE014011	125574 MARC 1PIG Sus scrofa cDNA 5', mRNA sequence						0.756355	0.988935	0.897476
GO:0048522	positive regulation of cellular process	BE235135	142484 MARC 1PIG Sus scrofa cDNA 5', mRNA sequence						0.756355	0.988935	0.897476
GO:0032502	developmental process	AK234461.1	Sus scrofa mRNA, clone:OVR010067A09, expressed in ovary		NM_006107.3	51747	LUC7L3	LUC7-like 3 (S. cerevisiae)	0.756676	0.98894	1.05728
GO:0032502	developmental process	AK235345.1	Sus scrofa mRNA, clone:OVRM10071B07, expressed in ovary		NM_004529.2	4300	MLLT3	myeloid/lymphoid or mixed-lineage leukemia (trithorax homolog, Drosophila); translocated to, 3	0.756676	0.98894	1.05728
GO:0032502	developmental process	AK235603.1	Sus scrofa mRNA, clone:OVRM10097A03, expressed in ovary		NM_003374.1	7416	VDAC1	voltage-dependent anion channel 1	0.756676	0.98894	1.05728
GO:0032502	developmental process	AK232555.1	Sus scrofa mRNA, clone:LVR010073A12, expressed in liver		NM_004208.2	9131	AIFM1	apoptosis-inducing factor, mitochondrion-associated, 1	0.756676	0.98894	1.05728
GO:0032502	developmental process	AK236182.1	Sus scrofa mRNA, clone:OVRM10161E01, expressed in ovary		NM_005006.5	4719	NDUFS1	NADH dehydrogenase (ubiquinone) Fe-S protein 1, 75kDa (NADH-coenzyme Q reductase)	0.756676	0.98894	1.05728
GO:0032502	developmental process	AK230559.1	Sus scrofa mRNA, clone:AMP010010A02, expressed in alveolar macrophage	----	BC064357.1	8301	PICALM	phosphatidylinositol binding clathrin assembly protein	0.756676	0.98894	1.05728
GO:0032502	developmental process	AK233000.1	Sus scrofa mRNA, clone:LVRM10065H01, expressed in liver		BC028234.1	8775	NAPA	N-ethylmaleimide-sensitive factor attachment protein, alpha	0.756676	0.98894	1.05728
GO:0032502	developmental process	AK239887.1	Sus scrofa mRNA, clone:UTR010007G10, expressed in uterus		DQ896345.2	5134	PDCD2	programmed cell death 2	0.756676	0.98894	1.05728
GO:0032502	developmental process	AF329358.1	Sus scrofa laminin beta-1 chain mRNA, partial cds	LAMB1	NM_002291.2	3912	LAMB1	laminin, beta 1	0.756676	0.98894	1.05728
GO:0032502	developmental process	AY609606.1	Sus scrofa clone Clu_207459.scr.msk.p1.Contig1, mRNA sequence		NM_001128209.1	6444	SGCD	sarcoglycan, delta (35kDa dystrophin-associated glycoprotein)	0.756676	0.98894	1.05728
GO:0032502	developmental process	AY610166.1	Sus scrofa clone Clu_8309.scr.msk.p1.Contig3, mRNA sequence		BC010353.1	9200	PTPLA	protein tyrosine phosphatase-like (proline instead of catalytic arginine), member A	0.756676	0.98894	1.05728
GO:0032502	developmental process	AY610295.1	Sus scrofa clone rcsk04_o4.y1.abd, mRNA sequence		BC015519.2	9141	PDCD5	programmed cell death 5	0.756676	0.98894	1.05728
GO:0032502	developmental process	AY610394.1	Sus scrofa clone reru31c_i7.y1.abd, mRNA sequence		NM_002495.2	4724	NDUFS4	NADH dehydrogenase (ubiquinone) Fe-S protein 4, 18kDa (NADH-coenzyme Q reductase)	0.756676	0.98894	1.05728
GO:0032502	developmental process	AY610481.1	Sus scrofa clone rspc006_d9.y1.abd, mRNA sequence		XM_001715053.2	100128328	LOC100128328	hypothetical LOC100128328	0.756676	0.98894	1.05728
GO:0032502	developmental process	BX665103	BX665103 Sus Scrofa library (scag) Sus scrofa cDNA clone scag0004.c.03 5prim, mRNA sequence						0.756676	0.98894	1.05728
GO:0032502	developmental process	BX672955	BX672955 Sus Scrofa library (scac) Sus scrofa cDNA clone scac0044.o.04 5prim, mRNA sequence						0.756676	0.98894	1.05728
GO:0032502	developmental process	BP158662	BP158662 full-length enriched swine cDNA library, adult spleen Sus scrofa cDNA clone SPL010018F11 5', mRNA sequence						0.756676	0.98894	1.05728
GO:0032502	developmental process	BP143486	BP143486 full-length enriched swine cDNA library, adult ovary Sus scrofa cDNA clone OVR010017F01 5', mRNA sequence						0.756676	0.98894	1.05728
GO:0032502	developmental process	CK449659	893247 MARC 4PIG Sus scrofa cDNA 5', mRNA sequence						0.756676	0.98894	1.05728
GO:0032502	developmental process	CK452762	908422 MARC 4PIG Sus scrofa cDNA 5', mRNA sequence						0.756676	0.98894	1.05728
GO:0032502	developmental process	BX923538	BX923538 Sus Scrofa library (scan) Sus scrofa cDNA clone scan0014.h.08 5prim, mRNA sequence						0.756676	0.98894	1.05728
GO:0032502	developmental process	BX923548	BX923548 Sus Scrofa library (scan) Sus scrofa cDNA clone scan0012.k.22 5prim, mRNA sequence						0.756676	0.98894	1.05728
GO:0032502	developmental process	BX924637	BX924637 Sus Scrofa library (scan) Sus scrofa cDNA clone scan0017.d.21 5prim, mRNA sequence						0.756676	0.98894	1.05728
GO:0032502	developmental process	BX925993	BX925993 Sus Scrofa library (scan) Sus scrofa cDNA clone scan0021.f.19 5prim, mRNA sequence						0.756676	0.98894	1.05728
GO:0032502	developmental process	CN164178	994302 MARC 4PIG Sus scrofa cDNA 5', mRNA sequence						0.756676	0.98894	1.05728
GO:0032502	developmental process	DN100858	1000249 MARC 4PIG Sus scrofa cDNA 5', mRNA sequence						0.756676	0.98894	1.05728
GO:0032502	developmental process	DN112655	1111858 MARC 4PIG Sus scrofa cDNA 3', mRNA sequence						0.756676	0.98894	1.05728
GO:0032502	developmental process	DN118117	1117841 MARC 4PIG Sus scrofa cDNA 5', mRNA sequence						0.756676	0.98894	1.05728
GO:0032502	developmental process	DN120593	1120622 MARC 4PIG Sus scrofa cDNA 5', mRNA sequence						0.756676	0.98894	1.05728
GO:0032502	developmental process	DN124736	1138534 MARC 4PIG Sus scrofa cDNA 5', mRNA sequence						0.756676	0.98894	1.05728
GO:0032502	developmental process	DN128580	1142660 MARC 4PIG Sus scrofa cDNA 3', mRNA sequence						0.756676	0.98894	1.05728
GO:0032502	developmental process	DV904076	POSM0605028_M02R porcine skeletal muscle cDNA library (PoSM) Sus scrofa cDNA 3', mRNA sequence						0.756676	0.98894	1.05728
GO:0032502	developmental process	CX057037	PDUts2009C04 Porcine testis cDNA library II Sus scrofa cDNA clone PDUts2009C04 5' similar to homologue to ref|NM_017826.1| Homo sapiens hypothetical protein FLJ20449 (FLJ20449), mRNA, mRNA sequence						0.756676	0.98894	1.05728
GO:0032502	developmental process	DT324183	SusFleck_BF_0033_0036_5_pCNS_D01 SusFleck Backfat Sus scrofa cDNA clone 0033_0036_D01 5', mRNA sequence						0.756676	0.98894	1.05728
GO:0032502	developmental process	EV867707	rpbfe0123_n8.y1 bfe Sus scrofa cDNA 5', mRNA sequence						0.756676	0.98894	1.05728
GO:0032502	developmental process	EW088403	recc2833c_i12.y1 ecc Sus scrofa cDNA 5', mRNA sequence						0.756676	0.98894	1.05728
GO:0032502	developmental process	EW137538	reru09c_h4.y1 eru Sus scrofa cDNA 5', mRNA sequence						0.756676	0.98894	1.05728
GO:0032502	developmental process	EW158560	reye1608b_e17.y1 eye Sus scrofa cDNA 5', mRNA sequence						0.756676	0.98894	1.05728
GO:0032502	developmental process	EW228094	rgul0125_o12.y1 gul Sus scrofa cDNA 5', mRNA sequence						0.756676	0.98894	1.05728
GO:0032502	developmental process	EW417768	rnbm12b_c21.y1 nbm Sus scrofa cDNA 5', mRNA sequence						0.756676	0.98894	1.05728
GO:0032502	developmental process	EW421594	rnca11b_e13.y1 nca Sus scrofa cDNA 5', mRNA sequence						0.756676	0.98894	1.05728
GO:0044275	cellular carbohydrate catabolic process	AK236324.1	Sus scrofa mRNA, clone:OVRM10181E04, expressed in ovary		BC000439.2	5162	PDHB	pyruvate dehydrogenase (lipoamide) beta	0.757699	0.988955	2.1425
GO:0051053	negative regulation of DNA metabolic process	AK239756.1	Sus scrofa mRNA, clone:THY010202F01, expressed in thymus		BC004465.1	54386	TERF2IP	telomeric repeat binding factor 2, interacting protein	0.757699	0.988955	2.1425
GO:0009267	cellular response to starvation	AK240181.1	Sus scrofa mRNA, clone:UTR010038F11, expressed in uterus		NM_032514.2	84557	MAP1LC3A	microtubule-associated protein 1 light chain 3 alpha	0.757699	0.988955	2.1425
GO:0042594	response to starvation	AK240181.1	Sus scrofa mRNA, clone:UTR010038F11, expressed in uterus		NM_032514.2	84557	MAP1LC3A	microtubule-associated protein 1 light chain 3 alpha	0.757699	0.988955	2.1425
GO:0000245	spliceosome assembly	AY610031.1	Sus scrofa clone Clu_58583.scr.msk.p1.Contig3, mRNA sequence		NM_003616.2	8487	SIP1	survival of motor neuron protein interacting protein 1	0.757699	0.988955	2.1425
GO:0048145	regulation of fibroblast proliferation	AY610394.1	Sus scrofa clone reru31c_i7.y1.abd, mRNA sequence		NM_002495.2	4724	NDUFS4	NADH dehydrogenase (ubiquinone) Fe-S protein 4, 18kDa (NADH-coenzyme Q reductase)	0.757699	0.988955	2.1425
GO:0043473	pigmentation	BP158662	BP158662 full-length enriched swine cDNA library, adult spleen Sus scrofa cDNA clone SPL010018F11 5', mRNA sequence						0.757699	0.988955	2.1425
GO:0002697	regulation of immune effector process	CK454638	915131 MARC 4PIG Sus scrofa cDNA 5', mRNA sequence						0.757699	0.988955	2.1425
GO:0009953	dorsal/ventral pattern formation	BX923538	BX923538 Sus Scrofa library (scan) Sus scrofa cDNA clone scan0014.h.08 5prim, mRNA sequence						0.757699	0.988955	2.1425
GO:0048747	muscle fiber development	BX925993	BX925993 Sus Scrofa library (scan) Sus scrofa cDNA clone scan0021.f.19 5prim, mRNA sequence						0.757699	0.988955	2.1425
GO:0048741	skeletal muscle fiber development	BX925993	BX925993 Sus Scrofa library (scan) Sus scrofa cDNA clone scan0021.f.19 5prim, mRNA sequence						0.757699	0.988955	2.1425
GO:0042102	positive regulation of T cell proliferation	CN164178	994302 MARC 4PIG Sus scrofa cDNA 5', mRNA sequence						0.757699	0.988955	2.1425
GO:0043254	regulation of protein complex assembly	DN120593	1120622 MARC 4PIG Sus scrofa cDNA 5', mRNA sequence						0.757699	0.988955	2.1425
GO:0031023	microtubule organizing center organization	DN132970	996409 MARC 4PIG Sus scrofa cDNA 5', mRNA sequence						0.757699	0.988955	2.1425
GO:0006937	regulation of muscle contraction	DV904076	POSM0605028_M02R porcine skeletal muscle cDNA library (PoSM) Sus scrofa cDNA 3', mRNA sequence						0.757699	0.988955	2.1425
GO:0007292	female gamete generation	CX057037	PDUts2009C04 Porcine testis cDNA library II Sus scrofa cDNA clone PDUts2009C04 5' similar to homologue to ref|NM_017826.1| Homo sapiens hypothetical protein FLJ20449 (FLJ20449), mRNA, mRNA sequence						0.757699	0.988955	2.1425
GO:0034329	cell junction assembly	DT324183	SusFleck_BF_0033_0036_5_pCNS_D01 SusFleck Backfat Sus scrofa cDNA clone 0033_0036_D01 5', mRNA sequence						0.757699	0.988955	2.1425
GO:0048593	camera-type eye morphogenesis	EW417768	rnbm12b_c21.y1 nbm Sus scrofa cDNA 5', mRNA sequence						0.757699	0.988955	2.1425
GO:0001666	response to hypoxia	EW464984	rnmm24c_m17.y1 nmm Sus scrofa cDNA 5', mRNA sequence						0.757699	0.988955	2.1425
GO:0006916	anti-apoptosis	AK235171.1	Sus scrofa mRNA, clone:OVRM10055D04, expressed in ovary		AF087894.1	23564	DDAH2	dimethylarginine dimethylaminohydrolase 2	0.766086	0.989074	1.35316
GO:0006916	anti-apoptosis	AK235751.1	Sus scrofa mRNA, clone:OVRM10111E07, expressed in ovary		NM_004323.4	573	BAG1	BCL2-associated athanogene	0.766086	0.989074	1.35316
GO:0006916	anti-apoptosis	DN123606	1123919 MARC 4PIG Sus scrofa cDNA 5', mRNA sequence						0.766086	0.989074	1.35316
GO:0016197	endosome transport	BX666658	BX666658 Sus Scrofa library (scac) Sus scrofa cDNA clone scac0025.d.07 3prim, mRNA sequence						0.766843	0.989085	1.51236
GO:0016197	endosome transport	CK454638	915131 MARC 4PIG Sus scrofa cDNA 5', mRNA sequence						0.766843	0.989085	1.51236
GO:0007626	locomotory behavior	AK235604.1	Sus scrofa mRNA, clone:OVRM10097B08, expressed in ovary		NM_001048251.1	123920	CMTM3	CKLF-like MARVEL transmembrane domain containing 3	0.767567	0.989095	0.485095
GO:0055086	nucleobase, nucleoside and nucleotide metabolic process	AK236182.1	Sus scrofa mRNA, clone:OVRM10161E01, expressed in ovary		NM_005006.5	4719	NDUFS1	NADH dehydrogenase (ubiquinone) Fe-S protein 1, 75kDa (NADH-coenzyme Q reductase)	0.770074	0.98913	0.634816
GO:0055086	nucleobase, nucleoside and nucleotide metabolic process	AK236416.1	Sus scrofa mRNA, clone:OVRM10189H07, expressed in ovary		NM_001071.2	7298	TYMS	thymidylate synthetase	0.770074	0.98913	0.634816
GO:0008202	steroid metabolic process	AY705447.1	Sus scrofa sterol response element binding protein cleavage-activating protein mRNA, partial cds	SCAP	AK300311.1	22937	SCAP	SREBF chaperone	0.770074	0.98913	0.634816
GO:0008202	steroid metabolic process	CF793647	889067 MARC 4PIG Sus scrofa cDNA 5', mRNA sequence						0.770074	0.98913	0.634816
GO:0006461	protein complex assembly	AK240563.1	Sus scrofa mRNA, clone:UTR010098F11, expressed in uterus		NM_001165928.1	1605	DAG1	dystroglycan 1 (dystrophin-associated glycoprotein 1)	0.785768	0.989345	0.761779
GO:0006461	protein complex assembly	AY610394.1	Sus scrofa clone reru31c_i7.y1.abd, mRNA sequence		NM_002495.2	4724	NDUFS4	NADH dehydrogenase (ubiquinone) Fe-S protein 4, 18kDa (NADH-coenzyme Q reductase)	0.785768	0.989345	0.761779
GO:0006461	protein complex assembly	DT324183	SusFleck_BF_0033_0036_5_pCNS_D01 SusFleck Backfat Sus scrofa cDNA clone 0033_0036_D01 5', mRNA sequence						0.785768	0.989345	0.761779
GO:0006461	protein complex assembly	EW055180	rpigcb_10659.y1 cty Sus scrofa cDNA 5', mRNA sequence						0.785768	0.989345	0.761779
GO:0048878	chemical homeostasis	AK236182.1	Sus scrofa mRNA, clone:OVRM10161E01, expressed in ovary		NM_005006.5	4719	NDUFS1	NADH dehydrogenase (ubiquinone) Fe-S protein 1, 75kDa (NADH-coenzyme Q reductase)	0.78695	0.989361	0.642751
GO:0048878	chemical homeostasis	EW357862	rlyg24_g14.y1 lyg Sus scrofa cDNA 5', mRNA sequence						0.78695	0.989361	0.642751
GO:0042221	response to chemical stimulus	AK234533.1	Sus scrofa mRNA, clone:OVR010076H11, expressed in ovary		AK292829.1	23190	UBXN4	UBX domain protein 4	0.78844	0.989381	0.816192
GO:0042221	response to chemical stimulus	AK232205.1	Sus scrofa mRNA, clone:LNG010103E07, expressed in lung		AK095911.1	27129	HSPB7	heat shock 27kDa protein family, member 7 (cardiovascular)	0.78844	0.989381	0.816192
GO:0042221	response to chemical stimulus	AK235604.1	Sus scrofa mRNA, clone:OVRM10097B08, expressed in ovary		NM_001048251.1	123920	CMTM3	CKLF-like MARVEL transmembrane domain containing 3	0.78844	0.989381	0.816192
GO:0042221	response to chemical stimulus	AK233231.1	Sus scrofa mRNA, clone:LVRM10107H06, expressed in liver		NM_002496.2	4728	NDUFS8	NADH dehydrogenase (ubiquinone) Fe-S protein 8, 23kDa (NADH-coenzyme Q reductase)	0.78844	0.989381	0.816192
GO:0042221	response to chemical stimulus	AY609666.1	Sus scrofa clone Clu_24219.scr.msk.p1.Contig4, mRNA sequence		NM_016041.3	51009	DERL2	Der1-like domain family, member 2	0.78844	0.989381	0.816192
GO:0042221	response to chemical stimulus	AY610394.1	Sus scrofa clone reru31c_i7.y1.abd, mRNA sequence		NM_002495.2	4724	NDUFS4	NADH dehydrogenase (ubiquinone) Fe-S protein 4, 18kDa (NADH-coenzyme Q reductase)	0.78844	0.989381	0.816192
GO:0006412	translation	AK238836.1	Sus scrofa mRNA, clone:THY010035H09, expressed in thymus		NM_031992.1	7458	EIF4H	eukaryotic translation initiation factor 4H	0.792006	0.989428	1.25415
GO:0006412	translation	AK236127.1	Sus scrofa mRNA, clone:OVRM10155A01, expressed in ovary		NM_001135654.1	8761	PABPC4	poly(A) binding protein, cytoplasmic 4 (inducible form)	0.792006	0.989428	1.25415
GO:0006412	translation	DN123551	1123855 MARC 4PIG Sus scrofa cDNA 5', mRNA sequence						0.792006	0.989428	1.25415
GO:0006412	translation	EV928670	rche13_i19.y1 che Sus scrofa cDNA 5', mRNA sequence						0.792006	0.989428	1.25415
GO:0009101	glycoprotein biosynthetic process	AK236028.1	Sus scrofa mRNA, clone:OVRM10140A03, expressed in ovary		AY358465.1	11253	MAN1B1	mannosidase, alpha, class 1B, member 1	0.794648	0.989463	1.46915
GO:0010498	proteasomal protein catabolic process	AY609666.1	Sus scrofa clone Clu_24219.scr.msk.p1.Contig4, mRNA sequence		NM_016041.3	51009	DERL2	Der1-like domain family, member 2	0.794648	0.989463	1.46915
GO:0043161	proteasomal ubiquitin-dependent protein catabolic process	AY609666.1	Sus scrofa clone Clu_24219.scr.msk.p1.Contig4, mRNA sequence		NM_016041.3	51009	DERL2	Der1-like domain family, member 2	0.794648	0.989463	1.46915
GO:0010498	proteasomal protein catabolic process	BX915041	BX915041 Sus Scrofa library (scan) Sus scrofa cDNA clone scan0027.c.13 5prim, mRNA sequence						0.794648	0.989463	1.46915
GO:0043161	proteasomal ubiquitin-dependent protein catabolic process	BX915041	BX915041 Sus Scrofa library (scan) Sus scrofa cDNA clone scan0027.c.13 5prim, mRNA sequence						0.794648	0.989463	1.46915
GO:0009101	glycoprotein biosynthetic process	DR120938	COG3c1 Pig pBluescript and pTrueBlue library Sus scrofa cDNA 5', mRNA sequence						0.794648	0.989463	1.46915
GO:0006396	RNA processing	AK234461.1	Sus scrofa mRNA, clone:OVR010067A09, expressed in ovary		NM_006107.3	51747	LUC7L3	LUC7-like 3 (S. cerevisiae)	0.795547	0.989475	1.10979
GO:0006396	RNA processing	AK237695.1	Sus scrofa mRNA, clone:SPL010081H01, expressed in spleen		BC053635.1	8602	NOP14	NOP14 nucleolar protein homolog (yeast)	0.795547	0.989475	1.10979
GO:0006396	RNA processing	AK236127.1	Sus scrofa mRNA, clone:OVRM10155A01, expressed in ovary		NM_001135654.1	8761	PABPC4	poly(A) binding protein, cytoplasmic 4 (inducible form)	0.795547	0.989475	1.10979
GO:0006396	RNA processing	AK230569.1	Sus scrofa mRNA, clone:AMP010010H06, expressed in alveolar macrophage	----	NM_001358.2	1665	DHX15	DEAH (Asp-Glu-Ala-His) box polypeptide 15	0.795547	0.989475	1.10979
GO:0006396	RNA processing	AK236404.1	Sus scrofa mRNA, clone:OVRM10189A09, expressed in ovary		AK297127.1	11100	HNRNPUL1	heterogeneous nuclear ribonucleoprotein U-like 1	0.795547	0.989475	1.10979
GO:0006396	RNA processing	AK239611.1	Sus scrofa mRNA, clone:THY010116E05, expressed in thymus		NR_003249.1	9987	HNRPDL	heterogeneous nuclear ribonucleoprotein D-like	0.795547	0.989475	1.10979
GO:0006396	RNA processing	AK233382.1	Sus scrofa mRNA, clone:LVRM10136B04, expressed in liver		CR594689.1	7884	SLBP	stem-loop binding protein	0.795547	0.989475	1.10979
GO:0006396	RNA processing	AK233966.1	Sus scrofa mRNA, clone:MLN010082C02, expressed in mesenteric lymph node		BC107696.1	56915	EXOSC5	exosome component 5	0.795547	0.989475	1.10979
GO:0006396	RNA processing	AY609798.1	Sus scrofa clone Clu_3164.scr.msk.p1.Contig1, mRNA sequence		AK290334.1	51319	RSRC1	arginine/serine-rich coiled-coil 1	0.795547	0.989475	1.10979
GO:0006396	RNA processing	AY610031.1	Sus scrofa clone Clu_58583.scr.msk.p1.Contig3, mRNA sequence		NM_003616.2	8487	SIP1	survival of motor neuron protein interacting protein 1	0.795547	0.989475	1.10979
GO:0006396	RNA processing	BX667682	BX667682 Sus Scrofa library (scac) Sus scrofa cDNA clone scac0026.g.10 5prim, mRNA sequence						0.795547	0.989475	1.10979
GO:0006396	RNA processing	CJ011361	CJ011361 full-length enriched swine cDNA library, adult mesenteric lymph node Sus scrofa cDNA clone MLN01D120048 5', mRNA sequence						0.795547	0.989475	1.10979
GO:0042127	regulation of cell proliferation	AF329358.1	Sus scrofa laminin beta-1 chain mRNA, partial cds	LAMB1	NM_002291.2	3912	LAMB1	laminin, beta 1	0.796121	0.989482	1.13427
GO:0042127	regulation of cell proliferation	AY609666.1	Sus scrofa clone Clu_24219.scr.msk.p1.Contig4, mRNA sequence		NM_016041.3	51009	DERL2	Der1-like domain family, member 2	0.796121	0.989482	1.13427
GO:0042127	regulation of cell proliferation	AY610394.1	Sus scrofa clone reru31c_i7.y1.abd, mRNA sequence		NM_002495.2	4724	NDUFS4	NADH dehydrogenase (ubiquinone) Fe-S protein 4, 18kDa (NADH-coenzyme Q reductase)	0.796121	0.989482	1.13427
GO:0042127	regulation of cell proliferation	BX915041	BX915041 Sus Scrofa library (scan) Sus scrofa cDNA clone scan0027.c.13 5prim, mRNA sequence						0.796121	0.989482	1.13427
GO:0042127	regulation of cell proliferation	BX918412	BX918412 Sus Scrofa library (scan) Sus scrofa cDNA clone scan0038.i.09 5prim, mRNA sequence						0.796121	0.989482	1.13427
GO:0042127	regulation of cell proliferation	BX923548	BX923548 Sus Scrofa library (scan) Sus scrofa cDNA clone scan0012.k.22 5prim, mRNA sequence						0.796121	0.989482	1.13427
GO:0042127	regulation of cell proliferation	CN164178	994302 MARC 4PIG Sus scrofa cDNA 5', mRNA sequence						0.796121	0.989482	1.13427
GO:0042127	regulation of cell proliferation	DT324183	SusFleck_BF_0033_0036_5_pCNS_D01 SusFleck Backfat Sus scrofa cDNA clone 0033_0036_D01 5', mRNA sequence						0.796121	0.989482	1.13427
GO:0042127	regulation of cell proliferation	EW222667	rgul0130_k18.y1 gul Sus scrofa cDNA 5', mRNA sequence						0.796121	0.989482	1.13427
GO:0009056	catabolic process	AK235171.1	Sus scrofa mRNA, clone:OVRM10055D04, expressed in ovary		AF087894.1	23564	DDAH2	dimethylarginine dimethylaminohydrolase 2	0.801631	0.989554	1.08454
GO:0009056	catabolic process	AK235390.1	Sus scrofa mRNA, clone:OVRM10075G05, expressed in ovary		AK291935.1	118424	UBE2J2	ubiquitin-conjugating enzyme E2, J2 (UBC6 homolog, yeast)	0.801631	0.989554	1.08454
GO:0009056	catabolic process	AK232555.1	Sus scrofa mRNA, clone:LVR010073A12, expressed in liver		NM_004208.2	9131	AIFM1	apoptosis-inducing factor, mitochondrion-associated, 1	0.801631	0.989554	1.08454
GO:0009056	catabolic process	AK236127.1	Sus scrofa mRNA, clone:OVRM10155A01, expressed in ovary		NM_001135654.1	8761	PABPC4	poly(A) binding protein, cytoplasmic 4 (inducible form)	0.801631	0.989554	1.08454
GO:0009056	catabolic process	AK236324.1	Sus scrofa mRNA, clone:OVRM10181E04, expressed in ovary		BC000439.2	5162	PDHB	pyruvate dehydrogenase (lipoamide) beta	0.801631	0.989554	1.08454
GO:0009056	catabolic process	AK239600.1	Sus scrofa mRNA, clone:THY010115C09, expressed in thymus		AK291127.1	1632	DCI	dodecenoyl-Coenzyme A delta isomerase (3,2 trans-enoyl-Coenzyme A isomerase)	0.801631	0.989554	1.08454
GO:0009056	catabolic process	AK240181.1	Sus scrofa mRNA, clone:UTR010038F11, expressed in uterus		NM_032514.2	84557	MAP1LC3A	microtubule-associated protein 1 light chain 3 alpha	0.801631	0.989554	1.08454
GO:0009056	catabolic process	AY609666.1	Sus scrofa clone Clu_24219.scr.msk.p1.Contig4, mRNA sequence		NM_016041.3	51009	DERL2	Der1-like domain family, member 2	0.801631	0.989554	1.08454
GO:0009056	catabolic process	AY610411.1	Sus scrofa clone risp02_p18.y1.abd, mRNA sequence	TPRKB	NM_016058.2	51002	TPRKB	TP53RK binding protein	0.801631	0.989554	1.08454
GO:0009056	catabolic process	BX664880	BX664880 Sus Scrofa library (scag) Sus scrofa cDNA clone scag0005.d.07 5prim, mRNA sequence						0.801631	0.989554	1.08454
GO:0009056	catabolic process	BX665103	BX665103 Sus Scrofa library (scag) Sus scrofa cDNA clone scag0004.c.03 5prim, mRNA sequence						0.801631	0.989554	1.08454
GO:0009056	catabolic process	BX915041	BX915041 Sus Scrofa library (scan) Sus scrofa cDNA clone scan0027.c.13 5prim, mRNA sequence						0.801631	0.989554	1.08454
GO:0009056	catabolic process	CJ012192	CJ012192 full-length enriched swine cDNA library, adult mesenteric lymph node Sus scrofa cDNA clone MLN01B080058 5', mRNA sequence						0.801631	0.989554	1.08454
GO:0009056	catabolic process	AJ944603	AJ944603 CSEQRAN17 Sus scrofa cDNA clone C0007304f23 5', mRNA sequence						0.801631	0.989554	1.08454
GO:0009056	catabolic process	DY406584	1498188 MARC 3PIG Sus scrofa cDNA 5', mRNA sequence						0.801631	0.989554	1.08454
GO:0009056	catabolic process	AK236389	Sus scrofa mRNA, clone:OVRM10187H12, expressed in ovary	EPHX1	NM_000120.3	2052	EPHX1	epoxide hydrolase 1, microsomal (xenobiotic)	0.801631	0.989554	1.08454
GO:0009056	catabolic process	EV890051	rcad06b_b19.y1 cag Sus scrofa cDNA 5', mRNA sequence						0.801631	0.989554	1.08454
GO:0009144	purine nucleoside triphosphate metabolic process	AK236182.1	Sus scrofa mRNA, clone:OVRM10161E01, expressed in ovary		NM_005006.5	4719	NDUFS1	NADH dehydrogenase (ubiquinone) Fe-S protein 1, 75kDa (NADH-coenzyme Q reductase)	0.806044	0.98961	1.9777
GO:0009199	ribonucleoside triphosphate metabolic process	AK236182.1	Sus scrofa mRNA, clone:OVRM10161E01, expressed in ovary		NM_005006.5	4719	NDUFS1	NADH dehydrogenase (ubiquinone) Fe-S protein 1, 75kDa (NADH-coenzyme Q reductase)	0.806044	0.98961	1.9777
GO:0009205	purine ribonucleoside triphosphate metabolic process	AK236182.1	Sus scrofa mRNA, clone:OVRM10161E01, expressed in ovary		NM_005006.5	4719	NDUFS1	NADH dehydrogenase (ubiquinone) Fe-S protein 1, 75kDa (NADH-coenzyme Q reductase)	0.806044	0.98961	1.9777
GO:0046034	ATP metabolic process	AK236182.1	Sus scrofa mRNA, clone:OVRM10161E01, expressed in ovary		NM_005006.5	4719	NDUFS1	NADH dehydrogenase (ubiquinone) Fe-S protein 1, 75kDa (NADH-coenzyme Q reductase)	0.806044	0.98961	1.9777
GO:0016052	carbohydrate catabolic process	AK236324.1	Sus scrofa mRNA, clone:OVRM10181E04, expressed in ovary		BC000439.2	5162	PDHB	pyruvate dehydrogenase (lipoamide) beta	0.806044	0.98961	1.9777
GO:0006278	RNA-dependent DNA replication	AK239756.1	Sus scrofa mRNA, clone:THY010202F01, expressed in thymus		BC004465.1	54386	TERF2IP	telomeric repeat binding factor 2, interacting protein	0.806044	0.98961	1.9777
GO:0007004	telomere maintenance via telomerase	AK239756.1	Sus scrofa mRNA, clone:THY010202F01, expressed in thymus		BC004465.1	54386	TERF2IP	telomeric repeat binding factor 2, interacting protein	0.806044	0.98961	1.9777
GO:0031669	cellular response to nutrient levels	AK240181.1	Sus scrofa mRNA, clone:UTR010038F11, expressed in uterus		NM_032514.2	84557	MAP1LC3A	microtubule-associated protein 1 light chain 3 alpha	0.806044	0.98961	1.9777
GO:0031497	chromatin assembly	BX918412	BX918412 Sus Scrofa library (scan) Sus scrofa cDNA clone scan0038.i.09 5prim, mRNA sequence						0.806044	0.98961	1.9777
GO:0050671	positive regulation of lymphocyte proliferation	CN164178	994302 MARC 4PIG Sus scrofa cDNA 5', mRNA sequence						0.806044	0.98961	1.9777
GO:0032946	positive regulation of mononuclear cell proliferation	CN164178	994302 MARC 4PIG Sus scrofa cDNA 5', mRNA sequence						0.806044	0.98961	1.9777
GO:0007127	meiosis I	AJ950507	AJ950507 KN404_1 Sus scrofa cDNA clone C0007741i12 5', mRNA sequence						0.806044	0.98961	1.9777
GO:0034330	cell junction organization	DT324183	SusFleck_BF_0033_0036_5_pCNS_D01 SusFleck Backfat Sus scrofa cDNA clone 0033_0036_D01 5', mRNA sequence						0.806044	0.98961	1.9777
GO:0051339	regulation of lyase activity	EW407282	rmgp039_f21.y1 mgp Sus scrofa cDNA 5', mRNA sequence						0.806044	0.98961	1.9777
GO:0045761	regulation of adenylate cyclase activity	EW407282	rmgp039_f21.y1 mgp Sus scrofa cDNA 5', mRNA sequence						0.806044	0.98961	1.9777
GO:0031279	regulation of cyclase activity	EW407282	rmgp039_f21.y1 mgp Sus scrofa cDNA 5', mRNA sequence						0.806044	0.98961	1.9777
GO:0016071	mRNA metabolic process	AK230569.1	Sus scrofa mRNA, clone:AMP010010H06, expressed in alveolar macrophage	----	NM_001358.2	1665	DHX15	DEAH (Asp-Glu-Ala-His) box polypeptide 15	0.810905	0.989672	0.824921
GO:0016071	mRNA metabolic process	AK236404.1	Sus scrofa mRNA, clone:OVRM10189A09, expressed in ovary		AK297127.1	11100	HNRNPUL1	heterogeneous nuclear ribonucleoprotein U-like 1	0.810905	0.989672	0.824921
GO:0016071	mRNA metabolic process	AK233382.1	Sus scrofa mRNA, clone:LVRM10136B04, expressed in liver		CR594689.1	7884	SLBP	stem-loop binding protein	0.810905	0.989672	0.824921
GO:0016071	mRNA metabolic process	AY610031.1	Sus scrofa clone Clu_58583.scr.msk.p1.Contig3, mRNA sequence		NM_003616.2	8487	SIP1	survival of motor neuron protein interacting protein 1	0.810905	0.989672	0.824921
GO:0016071	mRNA metabolic process	BX667682	BX667682 Sus Scrofa library (scac) Sus scrofa cDNA clone scac0026.g.10 5prim, mRNA sequence						0.810905	0.989672	0.824921
GO:0016071	mRNA metabolic process	CJ011361	CJ011361 full-length enriched swine cDNA library, adult mesenteric lymph node Sus scrofa cDNA clone MLN01D120048 5', mRNA sequence						0.810905	0.989672	0.824921
GO:0048468	cell development	AK233000.1	Sus scrofa mRNA, clone:LVRM10065H01, expressed in liver		BC028234.1	8775	NAPA	N-ethylmaleimide-sensitive factor attachment protein, alpha	0.812206	0.989688	0.803439
GO:0048468	cell development	AF329358.1	Sus scrofa laminin beta-1 chain mRNA, partial cds	LAMB1	NM_002291.2	3912	LAMB1	laminin, beta 1	0.812206	0.989688	0.803439
GO:0048468	cell development	BX923548	BX923548 Sus Scrofa library (scan) Sus scrofa cDNA clone scan0012.k.22 5prim, mRNA sequence						0.812206	0.989688	0.803439
GO:0048468	cell development	BX925993	BX925993 Sus Scrofa library (scan) Sus scrofa cDNA clone scan0021.f.19 5prim, mRNA sequence						0.812206	0.989688	0.803439
GO:0048468	cell development	DV904076	POSM0605028_M02R porcine skeletal muscle cDNA library (PoSM) Sus scrofa cDNA 3', mRNA sequence						0.812206	0.989688	0.803439
GO:0048731	system development	AK230559.1	Sus scrofa mRNA, clone:AMP010010A02, expressed in alveolar macrophage	----	BC064357.1	8301	PICALM	phosphatidylinositol binding clathrin assembly protein	0.817713	0.989757	0.919945
GO:0048731	system development	AK233000.1	Sus scrofa mRNA, clone:LVRM10065H01, expressed in liver		BC028234.1	8775	NAPA	N-ethylmaleimide-sensitive factor attachment protein, alpha	0.817713	0.989757	0.919945
GO:0048731	system development	AF329358.1	Sus scrofa laminin beta-1 chain mRNA, partial cds	LAMB1	NM_002291.2	3912	LAMB1	laminin, beta 1	0.817713	0.989757	0.919945
GO:0048731	system development	AY609606.1	Sus scrofa clone Clu_207459.scr.msk.p1.Contig1, mRNA sequence		NM_001128209.1	6444	SGCD	sarcoglycan, delta (35kDa dystrophin-associated glycoprotein)	0.817713	0.989757	0.919945
GO:0048731	system development	AY610394.1	Sus scrofa clone reru31c_i7.y1.abd, mRNA sequence		NM_002495.2	4724	NDUFS4	NADH dehydrogenase (ubiquinone) Fe-S protein 4, 18kDa (NADH-coenzyme Q reductase)	0.817713	0.989757	0.919945
GO:0048731	system development	BX672955	BX672955 Sus Scrofa library (scac) Sus scrofa cDNA clone scac0044.o.04 5prim, mRNA sequence						0.817713	0.989757	0.919945
GO:0048731	system development	BX923548	BX923548 Sus Scrofa library (scan) Sus scrofa cDNA clone scan0012.k.22 5prim, mRNA sequence						0.817713	0.989757	0.919945
GO:0048731	system development	BX925993	BX925993 Sus Scrofa library (scan) Sus scrofa cDNA clone scan0021.f.19 5prim, mRNA sequence						0.817713	0.989757	0.919945
GO:0048731	system development	CN164178	994302 MARC 4PIG Sus scrofa cDNA 5', mRNA sequence						0.817713	0.989757	0.919945
GO:0048731	system development	DN100858	1000249 MARC 4PIG Sus scrofa cDNA 5', mRNA sequence						0.817713	0.989757	0.919945
GO:0048731	system development	DN112655	1111858 MARC 4PIG Sus scrofa cDNA 3', mRNA sequence						0.817713	0.989757	0.919945
GO:0048731	system development	DN120593	1120622 MARC 4PIG Sus scrofa cDNA 5', mRNA sequence						0.817713	0.989757	0.919945
GO:0048731	system development	DN128580	1142660 MARC 4PIG Sus scrofa cDNA 3', mRNA sequence						0.817713	0.989757	0.919945
GO:0048731	system development	DV904076	POSM0605028_M02R porcine skeletal muscle cDNA library (PoSM) Sus scrofa cDNA 3', mRNA sequence						0.817713	0.989757	0.919945
GO:0048731	system development	DT324183	SusFleck_BF_0033_0036_5_pCNS_D01 SusFleck Backfat Sus scrofa cDNA clone 0033_0036_D01 5', mRNA sequence						0.817713	0.989757	0.919945
GO:0048731	system development	EW088403	recc2833c_i12.y1 ecc Sus scrofa cDNA 5', mRNA sequence						0.817713	0.989757	0.919945
GO:0048731	system development	EW137538	reru09c_h4.y1 eru Sus scrofa cDNA 5', mRNA sequence						0.817713	0.989757	0.919945
GO:0048731	system development	EW158560	reye1608b_e17.y1 eye Sus scrofa cDNA 5', mRNA sequence						0.817713	0.989757	0.919945
GO:0048731	system development	EW417768	rnbm12b_c21.y1 nbm Sus scrofa cDNA 5', mRNA sequence						0.817713	0.989757	0.919945
GO:0010627	regulation of protein kinase cascade	EW177532	rfcc24b_f2.y1 fcc Sus scrofa cDNA 5', mRNA sequence						0.821431	0.989803	0.659232
GO:0010627	regulation of protein kinase cascade	BE014011	125574 MARC 1PIG Sus scrofa cDNA 5', mRNA sequence						0.821431	0.989803	0.659232
GO:0009607	response to biotic stimulus	AK234533.1	Sus scrofa mRNA, clone:OVR010076H11, expressed in ovary		AK292829.1	23190	UBXN4	UBX domain protein 4	0.827323	0.989875	1.22429
GO:0009607	response to biotic stimulus	AK232205.1	Sus scrofa mRNA, clone:LNG010103E07, expressed in lung		AK095911.1	27129	HSPB7	heat shock 27kDa protein family, member 7 (cardiovascular)	0.827323	0.989875	1.22429
GO:0009607	response to biotic stimulus	AK236404.1	Sus scrofa mRNA, clone:OVRM10189A09, expressed in ovary		AK297127.1	11100	HNRNPUL1	heterogeneous nuclear ribonucleoprotein U-like 1	0.827323	0.989875	1.22429
GO:0009607	response to biotic stimulus	AY609666.1	Sus scrofa clone Clu_24219.scr.msk.p1.Contig4, mRNA sequence		NM_016041.3	51009	DERL2	Der1-like domain family, member 2	0.827323	0.989875	1.22429
GO:0046649	lymphocyte activation	CN164178	994302 MARC 4PIG Sus scrofa cDNA 5', mRNA sequence						0.831327	0.989923	0.514201
GO:0008380	RNA splicing	AK234461.1	Sus scrofa mRNA, clone:OVR010067A09, expressed in ovary		NM_006107.3	51747	LUC7L3	LUC7-like 3 (S. cerevisiae)	0.83511	0.989968	1.13905
GO:0008380	RNA splicing	AK230569.1	Sus scrofa mRNA, clone:AMP010010H06, expressed in alveolar macrophage	----	NM_001358.2	1665	DHX15	DEAH (Asp-Glu-Ala-His) box polypeptide 15	0.83511	0.989968	1.13905
GO:0008380	RNA splicing	AK236404.1	Sus scrofa mRNA, clone:OVRM10189A09, expressed in ovary		AK297127.1	11100	HNRNPUL1	heterogeneous nuclear ribonucleoprotein U-like 1	0.83511	0.989968	1.13905
GO:0008380	RNA splicing	AY609798.1	Sus scrofa clone Clu_3164.scr.msk.p1.Contig1, mRNA sequence		AK290334.1	51319	RSRC1	arginine/serine-rich coiled-coil 1	0.83511	0.989968	1.13905
GO:0008380	RNA splicing	AY610031.1	Sus scrofa clone Clu_58583.scr.msk.p1.Contig3, mRNA sequence		NM_003616.2	8487	SIP1	survival of motor neuron protein interacting protein 1	0.83511	0.989968	1.13905
GO:0008380	RNA splicing	BX667682	BX667682 Sus Scrofa library (scac) Sus scrofa cDNA clone scac0026.g.10 5prim, mRNA sequence						0.83511	0.989968	1.13905
GO:0008380	RNA splicing	CJ011361	CJ011361 full-length enriched swine cDNA library, adult mesenteric lymph node Sus scrofa cDNA clone MLN01D120048 5', mRNA sequence						0.83511	0.989968	1.13905
GO:0040008	regulation of growth	AY609666.1	Sus scrofa clone Clu_24219.scr.msk.p1.Contig4, mRNA sequence		NM_016041.3	51009	DERL2	Der1-like domain family, member 2	0.8449	0.990083	1.20988
GO:0040008	regulation of growth	DV904076	POSM0605028_M02R porcine skeletal muscle cDNA library (PoSM) Sus scrofa cDNA 3', mRNA sequence						0.8449	0.990083	1.20988
GO:0040008	regulation of growth	EW421594	rnca11b_e13.y1 nca Sus scrofa cDNA 5', mRNA sequence						0.8449	0.990083	1.20988
GO:0040008	regulation of growth	BE235135	142484 MARC 1PIG Sus scrofa cDNA 5', mRNA sequence						0.8449	0.990083	1.20988
GO:0006323	DNA packaging	AK237149.1	Sus scrofa mRNA, clone:SPL010004H09, expressed in spleen		AK092008.1	54892	NCAPG2	non-SMC condensin II complex, subunit G2	0.849355	0.990135	1.38973
GO:0006323	DNA packaging	BX918412	BX918412 Sus Scrofa library (scan) Sus scrofa cDNA clone scan0038.i.09 5prim, mRNA sequence						0.849355	0.990135	1.38973
GO:0022411	cellular component disassembly	AK232555.1	Sus scrofa mRNA, clone:LVR010073A12, expressed in liver		NM_004208.2	9131	AIFM1	apoptosis-inducing factor, mitochondrion-associated, 1	0.85251	0.990171	1.83643
GO:0031347	regulation of defense response	CK454638	915131 MARC 4PIG Sus scrofa cDNA 5', mRNA sequence						0.85251	0.990171	1.83643
GO:0006368	RNA elongation from RNA polymerase II promoter	BX914521	BX914521 Sus Scrofa library (scan) Sus scrofa cDNA clone scan0001.d.06 5prim, mRNA sequence						0.85251	0.990171	1.83643
GO:0006354	RNA elongation	BX914521	BX914521 Sus Scrofa library (scan) Sus scrofa cDNA clone scan0001.d.06 5prim, mRNA sequence						0.85251	0.990171	1.83643
GO:0007030	Golgi organization	EV867707	rpbfe0123_n8.y1 bfe Sus scrofa cDNA 5', mRNA sequence						0.85251	0.990171	1.83643
GO:0048592	eye morphogenesis	EW417768	rnbm12b_c21.y1 nbm Sus scrofa cDNA 5', mRNA sequence						0.85251	0.990171	1.83643
GO:0008283	cell proliferation	AK236676.1	Sus scrofa mRNA, clone:OVRM10214D04, expressed in ovary		NM_003238.2	7042	TGFB2	transforming growth factor, beta 2	0.852983	0.990177	0.791078
GO:0008283	cell proliferation	CK467896	939242 MARC 4PIG Sus scrofa cDNA 5', mRNA sequence						0.852983	0.990177	0.791078
GO:0008283	cell proliferation	CN157951	946698 MARC 4PIG Sus scrofa cDNA 5', mRNA sequence						0.852983	0.990177	0.791078
GO:0008283	cell proliferation	EW429561	rnca04b_d14.y1 nca Sus scrofa cDNA 5', mRNA sequence						0.852983	0.990177	0.791078
GO:0009615	response to virus	AK236404.1	Sus scrofa mRNA, clone:OVRM10189A09, expressed in ovary		AK297127.1	11100	HNRNPUL1	heterogeneous nuclear ribonucleoprotein U-like 1	0.853433	0.990182	0.524695
GO:0012502	induction of programmed cell death	AK232555.1	Sus scrofa mRNA, clone:LVR010073A12, expressed in liver		NM_004208.2	9131	AIFM1	apoptosis-inducing factor, mitochondrion-associated, 1	0.862411	0.990283	1.19582
GO:0006917	induction of apoptosis	AK232555.1	Sus scrofa mRNA, clone:LVR010073A12, expressed in liver		NM_004208.2	9131	AIFM1	apoptosis-inducing factor, mitochondrion-associated, 1	0.862411	0.990283	1.19582
GO:0006917	induction of apoptosis	CK467405	938702 MARC 4PIG Sus scrofa cDNA 5', mRNA sequence						0.862411	0.990283	1.19582
GO:0012502	induction of programmed cell death	CK467405	938702 MARC 4PIG Sus scrofa cDNA 5', mRNA sequence						0.862411	0.990283	1.19582
GO:0012502	induction of programmed cell death	BX915041	BX915041 Sus Scrofa library (scan) Sus scrofa cDNA clone scan0027.c.13 5prim, mRNA sequence						0.862411	0.990283	1.19582
GO:0006917	induction of apoptosis	BX915041	BX915041 Sus Scrofa library (scan) Sus scrofa cDNA clone scan0027.c.13 5prim, mRNA sequence						0.862411	0.990283	1.19582
GO:0012502	induction of programmed cell death	EW421594	rnca11b_e13.y1 nca Sus scrofa cDNA 5', mRNA sequence						0.862411	0.990283	1.19582
GO:0006917	induction of apoptosis	EW421594	rnca11b_e13.y1 nca Sus scrofa cDNA 5', mRNA sequence						0.862411	0.990283	1.19582
GO:0034660	ncRNA metabolic process	AK237695.1	Sus scrofa mRNA, clone:SPL010081H01, expressed in spleen		BC053635.1	8602	NOP14	NOP14 nucleolar protein homolog (yeast)	0.874942	0.990421	0.685601
GO:0034660	ncRNA metabolic process	AK233966.1	Sus scrofa mRNA, clone:MLN010082C02, expressed in mesenteric lymph node		BC107696.1	56915	EXOSC5	exosome component 5	0.874942	0.990421	0.685601
GO:0030030	cell projection organization	AF329358.1	Sus scrofa laminin beta-1 chain mRNA, partial cds	LAMB1	NM_002291.2	3912	LAMB1	laminin, beta 1	0.874942	0.990421	0.685601
GO:0030030	cell projection organization	BX923548	BX923548 Sus Scrofa library (scan) Sus scrofa cDNA clone scan0012.k.22 5prim, mRNA sequence						0.874942	0.990421	0.685601
GO:0042330	taxis	AK235604.1	Sus scrofa mRNA, clone:OVRM10097B08, expressed in ovary		NM_001048251.1	123920	CMTM3	CKLF-like MARVEL transmembrane domain containing 3	0.875964	0.990432	0.535626
GO:0006935	chemotaxis	AK235604.1	Sus scrofa mRNA, clone:OVRM10097B08, expressed in ovary		NM_001048251.1	123920	CMTM3	CKLF-like MARVEL transmembrane domain containing 3	0.875964	0.990432	0.535626
GO:0006869	lipid transport	EH412738	TL505101 Sus LongSAGE/GLGI Express Library Sus scrofa cDNA, mRNA sequence						0.875964	0.990432	0.535626
GO:0043065	positive regulation of apoptosis	AK232555.1	Sus scrofa mRNA, clone:LVR010073A12, expressed in liver		NM_004208.2	9131	AIFM1	apoptosis-inducing factor, mitochondrion-associated, 1	0.883843	0.990516	1.14777
GO:0043065	positive regulation of apoptosis	CK467405	938702 MARC 4PIG Sus scrofa cDNA 5', mRNA sequence						0.883843	0.990516	1.14777
GO:0043065	positive regulation of apoptosis	BX915041	BX915041 Sus Scrofa library (scan) Sus scrofa cDNA clone scan0027.c.13 5prim, mRNA sequence						0.883843	0.990516	1.14777
GO:0043065	positive regulation of apoptosis	EW421594	rnca11b_e13.y1 nca Sus scrofa cDNA 5', mRNA sequence						0.883843	0.990516	1.14777
GO:0043065	positive regulation of apoptosis	BE235135	142484 MARC 1PIG Sus scrofa cDNA 5', mRNA sequence						0.883843	0.990516	1.14777
GO:0000398	nuclear mRNA splicing, via spliceosome	AK236404.1	Sus scrofa mRNA, clone:OVRM10189A09, expressed in ovary		AK297127.1	11100	HNRNPUL1	heterogeneous nuclear ribonucleoprotein U-like 1	0.891723	0.990599	1.22429
GO:0000377	RNA splicing, via transesterification reactions with bulged adenosine as nucleophile	AK236404.1	Sus scrofa mRNA, clone:OVRM10189A09, expressed in ovary		AK297127.1	11100	HNRNPUL1	heterogeneous nuclear ribonucleoprotein U-like 1	0.891723	0.990599	1.22429
GO:0000377	RNA splicing, via transesterification reactions with bulged adenosine as nucleophile	AY610031.1	Sus scrofa clone Clu_58583.scr.msk.p1.Contig3, mRNA sequence		NM_003616.2	8487	SIP1	survival of motor neuron protein interacting protein 1	0.891723	0.990599	1.22429
GO:0000398	nuclear mRNA splicing, via spliceosome	AY610031.1	Sus scrofa clone Clu_58583.scr.msk.p1.Contig3, mRNA sequence		NM_003616.2	8487	SIP1	survival of motor neuron protein interacting protein 1	0.891723	0.990599	1.22429
GO:0000377	RNA splicing, via transesterification reactions with bulged adenosine as nucleophile	BX667682	BX667682 Sus Scrofa library (scac) Sus scrofa cDNA clone scac0026.g.10 5prim, mRNA sequence						0.891723	0.990599	1.22429
GO:0000398	nuclear mRNA splicing, via spliceosome	BX667682	BX667682 Sus Scrofa library (scac) Sus scrofa cDNA clone scac0026.g.10 5prim, mRNA sequence						0.891723	0.990599	1.22429
GO:0009310	amine catabolic process	AK235171.1	Sus scrofa mRNA, clone:OVRM10055D04, expressed in ovary		AF087894.1	23564	DDAH2	dimethylarginine dimethylaminohydrolase 2	0.89717	0.990656	1.714
GO:0031668	cellular response to extracellular stimulus	AK240181.1	Sus scrofa mRNA, clone:UTR010038F11, expressed in uterus		NM_032514.2	84557	MAP1LC3A	microtubule-associated protein 1 light chain 3 alpha	0.89717	0.990656	1.714
GO:0034728	nucleosome organization	BX918412	BX918412 Sus Scrofa library (scan) Sus scrofa cDNA clone scan0038.i.09 5prim, mRNA sequence						0.89717	0.990656	1.714
GO:0043523	regulation of neuron apoptosis	DN120593	1120622 MARC 4PIG Sus scrofa cDNA 5', mRNA sequence						0.89717	0.990656	1.714
GO:0030509	BMP signaling pathway	DN121268	1121355 MARC 4PIG Sus scrofa cDNA 3', mRNA sequence						0.89717	0.990656	1.714
GO:0050821	protein stabilization	DR120938	COG3c1 Pig pBluescript and pTrueBlue library Sus scrofa cDNA 5', mRNA sequence						0.89717	0.990656	1.714
GO:0016192	vesicle-mediated transport	AK234277.1	Sus scrofa mRNA, clone:OVR010036G03, expressed in ovary		NM_213636.1	9260	PDLIM7	PDZ and LIM domain 7 (enigma)	0.898347	0.990668	0.886553
GO:0016192	vesicle-mediated transport	AK230559.1	Sus scrofa mRNA, clone:AMP010010A02, expressed in alveolar macrophage	----	BC064357.1	8301	PICALM	phosphatidylinositol binding clathrin assembly protein	0.898347	0.990668	0.886553
GO:0016192	vesicle-mediated transport	AK236601.1	Sus scrofa mRNA, clone:OVRM10207C01, expressed in ovary		AK292102.1	11015	KDELR3	KDEL (Lys-Asp-Glu-Leu) endoplasmic reticulum protein retention receptor 3	0.898347	0.990668	0.886553
GO:0016192	vesicle-mediated transport	AY609726.1	Sus scrofa clone Clu_27891.scr.msk.p1.Contig1, mRNA sequence		NM_001663.3	382	ARF6	ADP-ribosylation factor 6	0.898347	0.990668	0.886553
GO:0016192	vesicle-mediated transport	BX666658	BX666658 Sus Scrofa library (scac) Sus scrofa cDNA clone scac0025.d.07 3prim, mRNA sequence						0.898347	0.990668	0.886553
GO:0016192	vesicle-mediated transport	CK454638	915131 MARC 4PIG Sus scrofa cDNA 5', mRNA sequence						0.898347	0.990668	0.886553
GO:0016192	vesicle-mediated transport	DR120938	COG3c1 Pig pBluescript and pTrueBlue library Sus scrofa cDNA 5', mRNA sequence						0.898347	0.990668	0.886553
GO:0016192	vesicle-mediated transport	EW177532	rfcc24b_f2.y1 fcc Sus scrofa cDNA 5', mRNA sequence						0.898347	0.990668	0.886553
GO:0050776	regulation of immune response	CK454638	915131 MARC 4PIG Sus scrofa cDNA 5', mRNA sequence						0.898919	0.990674	0.547022
GO:0022603	regulation of anatomical structure morphogenesis	DN120593	1120622 MARC 4PIG Sus scrofa cDNA 5', mRNA sequence						0.898919	0.990674	0.547022
GO:0048870	cell motility	DT324183	SusFleck_BF_0033_0036_5_pCNS_D01 SusFleck Backfat Sus scrofa cDNA clone 0033_0036_D01 5', mRNA sequence						0.898919	0.990674	0.547022
GO:0019932	second-messenger-mediated signaling	AK236416.1	Sus scrofa mRNA, clone:OVRM10189H07, expressed in ovary		NM_001071.2	7298	TYMS	thymidylate synthetase	0.902739	0.990713	1.31846
GO:0006457	protein folding	AY609717.1	Sus scrofa clone Clu_2746.scr.msk.p1.Contig4, mRNA sequence		NM_006430.2	10575	CCT4	chaperonin containing TCP1, subunit 4 (delta)	0.902739	0.990713	1.31846
GO:0019932	second-messenger-mediated signaling	AY610394.1	Sus scrofa clone reru31c_i7.y1.abd, mRNA sequence		NM_002495.2	4724	NDUFS4	NADH dehydrogenase (ubiquinone) Fe-S protein 4, 18kDa (NADH-coenzyme Q reductase)	0.902739	0.990713	1.31846
GO:0016055	Wnt receptor signaling pathway	BX923538	BX923538 Sus Scrofa library (scan) Sus scrofa cDNA clone scan0014.h.08 5prim, mRNA sequence						0.902739	0.990713	1.31846
GO:0006457	protein folding	EW359956	rlyg33_i2.y1 lyg Sus scrofa cDNA 5', mRNA sequence						0.902739	0.990713	1.31846
GO:0016055	Wnt receptor signaling pathway	BE014011	125574 MARC 1PIG Sus scrofa cDNA 5', mRNA sequence						0.902739	0.990713	1.31846
GO:0022008	neurogenesis	AK233000.1	Sus scrofa mRNA, clone:LVRM10065H01, expressed in liver		BC028234.1	8775	NAPA	N-ethylmaleimide-sensitive factor attachment protein, alpha	0.902824	0.990714	0.771301
GO:0022008	neurogenesis	AF329358.1	Sus scrofa laminin beta-1 chain mRNA, partial cds	LAMB1	NM_002291.2	3912	LAMB1	laminin, beta 1	0.902824	0.990714	0.771301
GO:0022008	neurogenesis	BX923548	BX923548 Sus Scrofa library (scan) Sus scrofa cDNA clone scan0012.k.22 5prim, mRNA sequence						0.902824	0.990714	0.771301
GO:0043933	macromolecular complex subunit organization	AK240563.1	Sus scrofa mRNA, clone:UTR010098F11, expressed in uterus		NM_001165928.1	1605	DAG1	dystroglycan 1 (dystrophin-associated glycoprotein 1)	0.906678	0.990753	0.877904
GO:0043933	macromolecular complex subunit organization	AY610031.1	Sus scrofa clone Clu_58583.scr.msk.p1.Contig3, mRNA sequence		NM_003616.2	8487	SIP1	survival of motor neuron protein interacting protein 1	0.906678	0.990753	0.877904
GO:0043933	macromolecular complex subunit organization	AY610394.1	Sus scrofa clone reru31c_i7.y1.abd, mRNA sequence		NM_002495.2	4724	NDUFS4	NADH dehydrogenase (ubiquinone) Fe-S protein 4, 18kDa (NADH-coenzyme Q reductase)	0.906678	0.990753	0.877904
GO:0043933	macromolecular complex subunit organization	BX914521	BX914521 Sus Scrofa library (scan) Sus scrofa cDNA clone scan0001.d.06 5prim, mRNA sequence						0.906678	0.990753	0.877904
GO:0043933	macromolecular complex subunit organization	BX918412	BX918412 Sus Scrofa library (scan) Sus scrofa cDNA clone scan0038.i.09 5prim, mRNA sequence						0.906678	0.990753	0.877904
GO:0043933	macromolecular complex subunit organization	DT324183	SusFleck_BF_0033_0036_5_pCNS_D01 SusFleck Backfat Sus scrofa cDNA clone 0033_0036_D01 5', mRNA sequence						0.906678	0.990753	0.877904
GO:0043933	macromolecular complex subunit organization	EW055180	rpigcb_10659.y1 cty Sus scrofa cDNA 5', mRNA sequence						0.906678	0.990753	0.877904
GO:0009057	macromolecule catabolic process	AK235390.1	Sus scrofa mRNA, clone:OVRM10075G05, expressed in ovary		AK291935.1	118424	UBE2J2	ubiquitin-conjugating enzyme E2, J2 (UBC6 homolog, yeast)	0.907135	0.990758	1.06105
GO:0009057	macromolecule catabolic process	AK232555.1	Sus scrofa mRNA, clone:LVR010073A12, expressed in liver		NM_004208.2	9131	AIFM1	apoptosis-inducing factor, mitochondrion-associated, 1	0.907135	0.990758	1.06105
GO:0009057	macromolecule catabolic process	AK236127.1	Sus scrofa mRNA, clone:OVRM10155A01, expressed in ovary		NM_001135654.1	8761	PABPC4	poly(A) binding protein, cytoplasmic 4 (inducible form)	0.907135	0.990758	1.06105
GO:0009057	macromolecule catabolic process	AK236324.1	Sus scrofa mRNA, clone:OVRM10181E04, expressed in ovary		BC000439.2	5162	PDHB	pyruvate dehydrogenase (lipoamide) beta	0.907135	0.990758	1.06105
GO:0009057	macromolecule catabolic process	AY609666.1	Sus scrofa clone Clu_24219.scr.msk.p1.Contig4, mRNA sequence		NM_016041.3	51009	DERL2	Der1-like domain family, member 2	0.907135	0.990758	1.06105
GO:0009057	macromolecule catabolic process	AY610411.1	Sus scrofa clone risp02_p18.y1.abd, mRNA sequence	TPRKB	NM_016058.2	51002	TPRKB	TP53RK binding protein	0.907135	0.990758	1.06105
GO:0009057	macromolecule catabolic process	BX664880	BX664880 Sus Scrofa library (scag) Sus scrofa cDNA clone scag0005.d.07 5prim, mRNA sequence						0.907135	0.990758	1.06105
GO:0009057	macromolecule catabolic process	BX665103	BX665103 Sus Scrofa library (scag) Sus scrofa cDNA clone scag0004.c.03 5prim, mRNA sequence						0.907135	0.990758	1.06105
GO:0009057	macromolecule catabolic process	BX915041	BX915041 Sus Scrofa library (scan) Sus scrofa cDNA clone scan0027.c.13 5prim, mRNA sequence						0.907135	0.990758	1.06105
GO:0009057	macromolecule catabolic process	CJ012192	CJ012192 full-length enriched swine cDNA library, adult mesenteric lymph node Sus scrofa cDNA clone MLN01B080058 5', mRNA sequence						0.907135	0.990758	1.06105
GO:0009057	macromolecule catabolic process	AJ944603	AJ944603 CSEQRAN17 Sus scrofa cDNA clone C0007304f23 5', mRNA sequence						0.907135	0.990758	1.06105
GO:0009057	macromolecule catabolic process	DY406584	1498188 MARC 3PIG Sus scrofa cDNA 5', mRNA sequence						0.907135	0.990758	1.06105
GO:0009057	macromolecule catabolic process	EV890051	rcad06b_b19.y1 cag Sus scrofa cDNA 5', mRNA sequence						0.907135	0.990758	1.06105
GO:0009117	nucleotide metabolic process	AK236182.1	Sus scrofa mRNA, clone:OVRM10161E01, expressed in ovary		NM_005006.5	4719	NDUFS1	NADH dehydrogenase (ubiquinone) Fe-S protein 1, 75kDa (NADH-coenzyme Q reductase)	0.91177	0.990804	0.704385
GO:0009117	nucleotide metabolic process	AK236416.1	Sus scrofa mRNA, clone:OVRM10189H07, expressed in ovary		NM_001071.2	7298	TYMS	thymidylate synthetase	0.91177	0.990804	0.704385
GO:0000375	RNA splicing, via transesterification reactions	AK236404.1	Sus scrofa mRNA, clone:OVRM10189A09, expressed in ovary		AK297127.1	11100	HNRNPUL1	heterogeneous nuclear ribonucleoprotein U-like 1	0.912192	0.990808	1.20516
GO:0000375	RNA splicing, via transesterification reactions	AY610031.1	Sus scrofa clone Clu_58583.scr.msk.p1.Contig3, mRNA sequence		NM_003616.2	8487	SIP1	survival of motor neuron protein interacting protein 1	0.912192	0.990808	1.20516
GO:0000375	RNA splicing, via transesterification reactions	BX667682	BX667682 Sus Scrofa library (scac) Sus scrofa cDNA clone scac0026.g.10 5prim, mRNA sequence						0.912192	0.990808	1.20516
GO:0006082	organic acid metabolic process	AK240417.1	Sus scrofa mRNA, clone:UTR010066E08, expressed in uterus		AB073609.1	55256	ADI1	acireductone dioxygenase 1	0.915776	0.990844	0.866631
GO:0019752	carboxylic acid metabolic process	AK240417.1	Sus scrofa mRNA, clone:UTR010066E08, expressed in uterus		AB073609.1	55256	ADI1	acireductone dioxygenase 1	0.915776	0.990844	0.866631
GO:0019752	carboxylic acid metabolic process	AK235171.1	Sus scrofa mRNA, clone:OVRM10055D04, expressed in ovary		AF087894.1	23564	DDAH2	dimethylarginine dimethylaminohydrolase 2	0.915776	0.990844	0.866631
GO:0006082	organic acid metabolic process	AK235171.1	Sus scrofa mRNA, clone:OVRM10055D04, expressed in ovary		AF087894.1	23564	DDAH2	dimethylarginine dimethylaminohydrolase 2	0.915776	0.990844	0.866631
GO:0019752	carboxylic acid metabolic process	AK231755.1	Sus scrofa mRNA, clone:LNG010019G08, expressed in lung		BC008723.2	440	ASNS	asparagine synthetase	0.915776	0.990844	0.866631
GO:0006082	organic acid metabolic process	AK231755.1	Sus scrofa mRNA, clone:LNG010019G08, expressed in lung		BC008723.2	440	ASNS	asparagine synthetase	0.915776	0.990844	0.866631
GO:0006082	organic acid metabolic process	AK239600.1	Sus scrofa mRNA, clone:THY010115C09, expressed in thymus		AK291127.1	1632	DCI	dodecenoyl-Coenzyme A delta isomerase (3,2 trans-enoyl-Coenzyme A isomerase)	0.915776	0.990844	0.866631
GO:0019752	carboxylic acid metabolic process	AK239600.1	Sus scrofa mRNA, clone:THY010115C09, expressed in thymus		AK291127.1	1632	DCI	dodecenoyl-Coenzyme A delta isomerase (3,2 trans-enoyl-Coenzyme A isomerase)	0.915776	0.990844	0.866631
GO:0006082	organic acid metabolic process	AK239646.1	Sus scrofa mRNA, clone:THY010118H06, expressed in thymus		BC066963.1	3032	HADHB	hydroxyacyl-Coenzyme A dehydrogenase/3-ketoacyl-Coenzyme A thiolase/enoyl-Coenzyme A hydratase (trifunctional protein), beta subunit	0.915776	0.990844	0.866631
GO:0019752	carboxylic acid metabolic process	AK239646.1	Sus scrofa mRNA, clone:THY010118H06, expressed in thymus		BC066963.1	3032	HADHB	hydroxyacyl-Coenzyme A dehydrogenase/3-ketoacyl-Coenzyme A thiolase/enoyl-Coenzyme A hydratase (trifunctional protein), beta subunit	0.915776	0.990844	0.866631
GO:0019752	carboxylic acid metabolic process	AK236752.1	Sus scrofa mRNA, clone:OVRM10224E06, expressed in ovary		NM_005003.2	4706	NDUFAB1	NADH dehydrogenase (ubiquinone) 1, alpha/beta subcomplex, 1, 8kDa	0.915776	0.990844	0.866631
GO:0006082	organic acid metabolic process	AK236752.1	Sus scrofa mRNA, clone:OVRM10224E06, expressed in ovary		NM_005003.2	4706	NDUFAB1	NADH dehydrogenase (ubiquinone) 1, alpha/beta subcomplex, 1, 8kDa	0.915776	0.990844	0.866631
GO:0032774	RNA biosynthetic process	AK231556.1	Sus scrofa mRNA, clone:ITT010093E05, expressed in intestine		NM_004506.3	3298	HSF2	heat shock transcription factor 2	0.918786	0.990874	0.779092
GO:0032774	RNA biosynthetic process	AK236398.1	Sus scrofa mRNA, clone:OVRM10188F03, expressed in ovary		AM746459.1	440400	RNASEK	ribonuclease, RNase K	0.918786	0.990874	0.779092
GO:0006631	fatty acid metabolic process	AK239600.1	Sus scrofa mRNA, clone:THY010115C09, expressed in thymus		AK291127.1	1632	DCI	dodecenoyl-Coenzyme A delta isomerase (3,2 trans-enoyl-Coenzyme A isomerase)	0.918786	0.990874	0.779092
GO:0006631	fatty acid metabolic process	AK239646.1	Sus scrofa mRNA, clone:THY010118H06, expressed in thymus		BC066963.1	3032	HADHB	hydroxyacyl-Coenzyme A dehydrogenase/3-ketoacyl-Coenzyme A thiolase/enoyl-Coenzyme A hydratase (trifunctional protein), beta subunit	0.918786	0.990874	0.779092
GO:0006631	fatty acid metabolic process	AK236752.1	Sus scrofa mRNA, clone:OVRM10224E06, expressed in ovary		NM_005003.2	4706	NDUFAB1	NADH dehydrogenase (ubiquinone) 1, alpha/beta subcomplex, 1, 8kDa	0.918786	0.990874	0.779092
GO:0032774	RNA biosynthetic process	BX914521	BX914521 Sus Scrofa library (scan) Sus scrofa cDNA clone scan0001.d.06 5prim, mRNA sequence						0.918786	0.990874	0.779092
GO:0007507	heart development	DV904076	POSM0605028_M02R porcine skeletal muscle cDNA library (PoSM) Sus scrofa cDNA 3', mRNA sequence						0.922293	0.990908	0.558914
GO:0016477	cell migration	DT324183	SusFleck_BF_0033_0036_5_pCNS_D01 SusFleck Backfat Sus scrofa cDNA clone 0033_0036_D01 5', mRNA sequence						0.922293	0.990908	0.558914
GO:0055114	oxidation reduction	AK231172.1	Sus scrofa mRNA, clone:ITT010006G12, expressed in intestine		BC002595.2	4713	NDUFB7	NADH dehydrogenase (ubiquinone) 1 beta subcomplex, 7, 18kDa	0.925349	0.990938	1.05436
GO:0055114	oxidation reduction	AK231733.1	Sus scrofa mRNA, clone:LNG010017B08, expressed in lung		BC003417.1	4705	NDUFA10	NADH dehydrogenase (ubiquinone) 1 alpha subcomplex, 10, 42kDa	0.925349	0.990938	1.05436
GO:0055114	oxidation reduction	AK235136.1	Sus scrofa mRNA, clone:OVRM10052F03, expressed in ovary		BC010740.1	26063	DECR2	2,4-dienoyl CoA reductase 2, peroxisomal	0.925349	0.990938	1.05436
GO:0055114	oxidation reduction	AK236182.1	Sus scrofa mRNA, clone:OVRM10161E01, expressed in ovary		NM_005006.5	4719	NDUFS1	NADH dehydrogenase (ubiquinone) Fe-S protein 1, 75kDa (NADH-coenzyme Q reductase)	0.925349	0.990938	1.05436
GO:0055114	oxidation reduction	AK236324.1	Sus scrofa mRNA, clone:OVRM10181E04, expressed in ovary		BC000439.2	5162	PDHB	pyruvate dehydrogenase (lipoamide) beta	0.925349	0.990938	1.05436
GO:0055114	oxidation reduction	AK236433.1	Sus scrofa mRNA, clone:OVRM10192E05, expressed in ovary		NM_005566.3	3939	LDHA	lactate dehydrogenase A	0.925349	0.990938	1.05436
GO:0055114	oxidation reduction	AK236637.1	Sus scrofa mRNA, clone:OVRM10210C08, expressed in ovary		AK301837.1	25828	TXN2	thioredoxin 2	0.925349	0.990938	1.05436
GO:0055114	oxidation reduction	AK236752.1	Sus scrofa mRNA, clone:OVRM10224E06, expressed in ovary		NM_005003.2	4706	NDUFAB1	NADH dehydrogenase (ubiquinone) 1, alpha/beta subcomplex, 1, 8kDa	0.925349	0.990938	1.05436
GO:0055114	oxidation reduction	BX668548	BX668548 Sus Scrofa library (scac) Sus scrofa cDNA clone scac0029.i.17 5prim, mRNA sequence						0.925349	0.990938	1.05436
GO:0055114	oxidation reduction	BP142174	BP142174 full-length enriched swine cDNA library, adult ovary Sus scrofa cDNA clone OVR010014C02 5', mRNA sequence						0.925349	0.990938	1.05436
GO:0055114	oxidation reduction	CK460216	930472 MARC 4PIG Sus scrofa cDNA 5', mRNA sequence						0.925349	0.990938	1.05436
GO:0055114	oxidation reduction	CN157675	946398 MARC 4PIG Sus scrofa cDNA 5', mRNA sequence						0.925349	0.990938	1.05436
GO:0055114	oxidation reduction	DN111105	1110192 MARC 4PIG Sus scrofa cDNA 5', mRNA sequence						0.925349	0.990938	1.05436
GO:0048514	blood vessel morphogenesis	DN120593	1120622 MARC 4PIG Sus scrofa cDNA 5', mRNA sequence						0.928898	0.990972	1.2855
GO:0048514	blood vessel morphogenesis	EW088403	recc2833c_i12.y1 ecc Sus scrofa cDNA 5', mRNA sequence						0.928898	0.990972	1.2855
GO:0042981	regulation of apoptosis	AK235171.1	Sus scrofa mRNA, clone:OVRM10055D04, expressed in ovary		AF087894.1	23564	DDAH2	dimethylarginine dimethylaminohydrolase 2	0.929275	0.990976	1.07125
GO:0042981	regulation of apoptosis	AK235751.1	Sus scrofa mRNA, clone:OVRM10111E07, expressed in ovary		NM_004323.4	573	BAG1	BCL2-associated athanogene	0.929275	0.990976	1.07125
GO:0042981	regulation of apoptosis	AK232555.1	Sus scrofa mRNA, clone:LVR010073A12, expressed in liver		NM_004208.2	9131	AIFM1	apoptosis-inducing factor, mitochondrion-associated, 1	0.929275	0.990976	1.07125
GO:0042981	regulation of apoptosis	CK467405	938702 MARC 4PIG Sus scrofa cDNA 5', mRNA sequence						0.929275	0.990976	1.07125
GO:0042981	regulation of apoptosis	BX915041	BX915041 Sus Scrofa library (scan) Sus scrofa cDNA clone scan0027.c.13 5prim, mRNA sequence						0.929275	0.990976	1.07125
GO:0042981	regulation of apoptosis	DN120593	1120622 MARC 4PIG Sus scrofa cDNA 5', mRNA sequence						0.929275	0.990976	1.07125
GO:0042981	regulation of apoptosis	DN123606	1123919 MARC 4PIG Sus scrofa cDNA 5', mRNA sequence						0.929275	0.990976	1.07125
GO:0042981	regulation of apoptosis	EW421594	rnca11b_e13.y1 nca Sus scrofa cDNA 5', mRNA sequence						0.929275	0.990976	1.07125
GO:0042981	regulation of apoptosis	BE235135	142484 MARC 1PIG Sus scrofa cDNA 5', mRNA sequence						0.929275	0.990976	1.07125
GO:0043068	positive regulation of programmed cell death	AK232555.1	Sus scrofa mRNA, clone:LVR010073A12, expressed in liver		NM_004208.2	9131	AIFM1	apoptosis-inducing factor, mitochondrion-associated, 1	0.929504	0.990978	1.11783
GO:0043068	positive regulation of programmed cell death	CK467405	938702 MARC 4PIG Sus scrofa cDNA 5', mRNA sequence						0.929504	0.990978	1.11783
GO:0043068	positive regulation of programmed cell death	BX915041	BX915041 Sus Scrofa library (scan) Sus scrofa cDNA clone scan0027.c.13 5prim, mRNA sequence						0.929504	0.990978	1.11783
GO:0043068	positive regulation of programmed cell death	EW421594	rnca11b_e13.y1 nca Sus scrofa cDNA 5', mRNA sequence						0.929504	0.990978	1.11783
GO:0043068	positive regulation of programmed cell death	BE235135	142484 MARC 1PIG Sus scrofa cDNA 5', mRNA sequence						0.929504	0.990978	1.11783
GO:0006259	DNA metabolic process	AK234932.1	Sus scrofa mRNA, clone:OVRM10033G12, expressed in ovary		AK311348.1	2189	FANCG	Fanconi anemia, complementation group G	0.929925	0.990982	0.898168
GO:0006259	DNA metabolic process	AK232555.1	Sus scrofa mRNA, clone:LVR010073A12, expressed in liver		NM_004208.2	9131	AIFM1	apoptosis-inducing factor, mitochondrion-associated, 1	0.929925	0.990982	0.898168
GO:0006259	DNA metabolic process	AK236416.1	Sus scrofa mRNA, clone:OVRM10189H07, expressed in ovary		NM_001071.2	7298	TYMS	thymidylate synthetase	0.929925	0.990982	0.898168
GO:0006259	DNA metabolic process	AK239756.1	Sus scrofa mRNA, clone:THY010202F01, expressed in thymus		BC004465.1	54386	TERF2IP	telomeric repeat binding factor 2, interacting protein	0.929925	0.990982	0.898168
GO:0006259	DNA metabolic process	BX664880	BX664880 Sus Scrofa library (scag) Sus scrofa cDNA clone scag0005.d.07 5prim, mRNA sequence						0.929925	0.990982	0.898168
GO:0006259	DNA metabolic process	BX918412	BX918412 Sus Scrofa library (scan) Sus scrofa cDNA clone scan0038.i.09 5prim, mRNA sequence						0.929925	0.990982	0.898168
GO:0006259	DNA metabolic process	CN164178	994302 MARC 4PIG Sus scrofa cDNA 5', mRNA sequence						0.929925	0.990982	0.898168
GO:0006259	DNA metabolic process	AJ950507	AJ950507 KN404_1 Sus scrofa cDNA clone C0007741i12 5', mRNA sequence						0.929925	0.990982	0.898168
GO:0006351	transcription, DNA-dependent	AK231556.1	Sus scrofa mRNA, clone:ITT010093E05, expressed in intestine		NM_004506.3	3298	HSF2	heat shock transcription factor 2	0.93489	0.991029	0.787042
GO:0006351	transcription, DNA-dependent	AK236398.1	Sus scrofa mRNA, clone:OVRM10188F03, expressed in ovary		AM746459.1	440400	RNASEK	ribonuclease, RNase K	0.93489	0.991029	0.787042
GO:0000902	cell morphogenesis	AF329358.1	Sus scrofa laminin beta-1 chain mRNA, partial cds	LAMB1	NM_002291.2	3912	LAMB1	laminin, beta 1	0.93489	0.991029	0.787042
GO:0000902	cell morphogenesis	BP158662	BP158662 full-length enriched swine cDNA library, adult spleen Sus scrofa cDNA clone SPL010018F11 5', mRNA sequence						0.93489	0.991029	0.787042
GO:0006351	transcription, DNA-dependent	BX914521	BX914521 Sus Scrofa library (scan) Sus scrofa cDNA clone scan0001.d.06 5prim, mRNA sequence						0.93489	0.991029	0.787042
GO:0000902	cell morphogenesis	BX923548	BX923548 Sus Scrofa library (scan) Sus scrofa cDNA clone scan0012.k.22 5prim, mRNA sequence						0.93489	0.991029	0.787042
GO:0006487	protein amino acid N-linked glycosylation	AK236028.1	Sus scrofa mRNA, clone:OVRM10140A03, expressed in ovary		AY358465.1	11253	MAN1B1	mannosidase, alpha, class 1B, member 1	0.940094	0.991079	1.60688
GO:0009141	nucleoside triphosphate metabolic process	AK236182.1	Sus scrofa mRNA, clone:OVRM10161E01, expressed in ovary		NM_005006.5	4719	NDUFS1	NADH dehydrogenase (ubiquinone) Fe-S protein 1, 75kDa (NADH-coenzyme Q reductase)	0.940094	0.991079	1.60688
GO:0048015	phosphoinositide-mediated signaling	AK236416.1	Sus scrofa mRNA, clone:OVRM10189H07, expressed in ovary		NM_001071.2	7298	TYMS	thymidylate synthetase	0.940094	0.991079	1.60688
GO:0007076	mitotic chromosome condensation	AK237149.1	Sus scrofa mRNA, clone:SPL010004H09, expressed in spleen		AK092008.1	54892	NCAPG2	non-SMC condensin II complex, subunit G2	0.940094	0.991079	1.60688
GO:0008406	gonad development	BX672955	BX672955 Sus Scrofa library (scac) Sus scrofa cDNA clone scac0044.o.04 5prim, mRNA sequence						0.940094	0.991079	1.60688
GO:0045137	development of primary sexual characteristics	BX672955	BX672955 Sus Scrofa library (scac) Sus scrofa cDNA clone scac0044.o.04 5prim, mRNA sequence						0.940094	0.991079	1.60688
GO:0042129	regulation of T cell proliferation	CN164178	994302 MARC 4PIG Sus scrofa cDNA 5', mRNA sequence						0.940094	0.991079	1.60688
GO:0006366	transcription from RNA polymerase II promoter	AK231556.1	Sus scrofa mRNA, clone:ITT010093E05, expressed in intestine		NM_004506.3	3298	HSF2	heat shock transcription factor 2	0.949484	0.991166	0.724227
GO:0006366	transcription from RNA polymerase II promoter	BX914521	BX914521 Sus Scrofa library (scan) Sus scrofa cDNA clone scan0001.d.06 5prim, mRNA sequence						0.949484	0.991166	0.724227
GO:0006397	mRNA processing	AK230569.1	Sus scrofa mRNA, clone:AMP010010H06, expressed in alveolar macrophage	----	NM_001358.2	1665	DHX15	DEAH (Asp-Glu-Ala-His) box polypeptide 15	0.951959	0.991189	0.881487
GO:0006397	mRNA processing	AK236404.1	Sus scrofa mRNA, clone:OVRM10189A09, expressed in ovary		AK297127.1	11100	HNRNPUL1	heterogeneous nuclear ribonucleoprotein U-like 1	0.951959	0.991189	0.881487
GO:0006397	mRNA processing	AK233382.1	Sus scrofa mRNA, clone:LVRM10136B04, expressed in liver		CR594689.1	7884	SLBP	stem-loop binding protein	0.951959	0.991189	0.881487
GO:0006397	mRNA processing	AY610031.1	Sus scrofa clone Clu_58583.scr.msk.p1.Contig3, mRNA sequence		NM_003616.2	8487	SIP1	survival of motor neuron protein interacting protein 1	0.951959	0.991189	0.881487
GO:0006397	mRNA processing	BX667682	BX667682 Sus Scrofa library (scac) Sus scrofa cDNA clone scac0026.g.10 5prim, mRNA sequence						0.951959	0.991189	0.881487
GO:0006397	mRNA processing	CJ011361	CJ011361 full-length enriched swine cDNA library, adult mesenteric lymph node Sus scrofa cDNA clone MLN01D120048 5', mRNA sequence						0.951959	0.991189	0.881487
GO:0030334	regulation of cell migration	AF329358.1	Sus scrofa laminin beta-1 chain mRNA, partial cds	LAMB1	NM_002291.2	3912	LAMB1	laminin, beta 1	0.954684	0.991214	1.25415
GO:0030334	regulation of cell migration	BX923548	BX923548 Sus Scrofa library (scan) Sus scrofa cDNA clone scan0012.k.22 5prim, mRNA sequence						0.954684	0.991214	1.25415
GO:0022607	cellular component assembly	AK240563.1	Sus scrofa mRNA, clone:UTR010098F11, expressed in uterus		NM_001165928.1	1605	DAG1	dystroglycan 1 (dystrophin-associated glycoprotein 1)	0.961895	0.991279	0.91009
GO:0022607	cellular component assembly	AY610031.1	Sus scrofa clone Clu_58583.scr.msk.p1.Contig3, mRNA sequence		NM_003616.2	8487	SIP1	survival of motor neuron protein interacting protein 1	0.961895	0.991279	0.91009
GO:0022607	cellular component assembly	AY610394.1	Sus scrofa clone reru31c_i7.y1.abd, mRNA sequence		NM_002495.2	4724	NDUFS4	NADH dehydrogenase (ubiquinone) Fe-S protein 4, 18kDa (NADH-coenzyme Q reductase)	0.961895	0.991279	0.91009
GO:0022607	cellular component assembly	BX914521	BX914521 Sus Scrofa library (scan) Sus scrofa cDNA clone scan0001.d.06 5prim, mRNA sequence						0.961895	0.991279	0.91009
GO:0022607	cellular component assembly	BX918412	BX918412 Sus Scrofa library (scan) Sus scrofa cDNA clone scan0038.i.09 5prim, mRNA sequence						0.961895	0.991279	0.91009
GO:0022607	cellular component assembly	DV904076	POSM0605028_M02R porcine skeletal muscle cDNA library (PoSM) Sus scrofa cDNA 3', mRNA sequence						0.961895	0.991279	0.91009
GO:0022607	cellular component assembly	DT324183	SusFleck_BF_0033_0036_5_pCNS_D01 SusFleck Backfat Sus scrofa cDNA clone 0033_0036_D01 5', mRNA sequence						0.961895	0.991279	0.91009
GO:0022607	cellular component assembly	EW055180	rpigcb_10659.y1 cty Sus scrofa cDNA 5', mRNA sequence						0.961895	0.991279	0.91009
GO:0043067	regulation of programmed cell death	AK235171.1	Sus scrofa mRNA, clone:OVRM10055D04, expressed in ovary		AF087894.1	23564	DDAH2	dimethylarginine dimethylaminohydrolase 2	0.962229	0.991282	1.05658
GO:0043067	regulation of programmed cell death	AK235751.1	Sus scrofa mRNA, clone:OVRM10111E07, expressed in ovary		NM_004323.4	573	BAG1	BCL2-associated athanogene	0.962229	0.991282	1.05658
GO:0043067	regulation of programmed cell death	AK232555.1	Sus scrofa mRNA, clone:LVR010073A12, expressed in liver		NM_004208.2	9131	AIFM1	apoptosis-inducing factor, mitochondrion-associated, 1	0.962229	0.991282	1.05658
GO:0043067	regulation of programmed cell death	CK467405	938702 MARC 4PIG Sus scrofa cDNA 5', mRNA sequence						0.962229	0.991282	1.05658
GO:0043067	regulation of programmed cell death	BX915041	BX915041 Sus Scrofa library (scan) Sus scrofa cDNA clone scan0027.c.13 5prim, mRNA sequence						0.962229	0.991282	1.05658
GO:0043067	regulation of programmed cell death	DN120593	1120622 MARC 4PIG Sus scrofa cDNA 5', mRNA sequence						0.962229	0.991282	1.05658
GO:0043067	regulation of programmed cell death	DN123606	1123919 MARC 4PIG Sus scrofa cDNA 5', mRNA sequence						0.962229	0.991282	1.05658
GO:0043067	regulation of programmed cell death	EW421594	rnca11b_e13.y1 nca Sus scrofa cDNA 5', mRNA sequence						0.962229	0.991282	1.05658
GO:0043067	regulation of programmed cell death	BE235135	142484 MARC 1PIG Sus scrofa cDNA 5', mRNA sequence						0.962229	0.991282	1.05658
GO:0000075	cell cycle checkpoint	AK234932.1	Sus scrofa mRNA, clone:OVRM10033G12, expressed in ovary		AK311348.1	2189	FANCG	Fanconi anemia, complementation group G	0.97029	0.991354	0.584319
GO:0051493	regulation of cytoskeleton organization	DN120593	1120622 MARC 4PIG Sus scrofa cDNA 5', mRNA sequence						0.97029	0.991354	0.584319
GO:0051239	regulation of multicellular organismal process	AK232205.1	Sus scrofa mRNA, clone:LNG010103E07, expressed in lung		AK095911.1	27129	HSPB7	heat shock 27kDa protein family, member 7 (cardiovascular)	0.976374	0.991407	0.891678
GO:0051239	regulation of multicellular organismal process	BX925993	BX925993 Sus Scrofa library (scan) Sus scrofa cDNA clone scan0021.f.19 5prim, mRNA sequence						0.976374	0.991407	0.891678
GO:0051239	regulation of multicellular organismal process	CN158607	947410 MARC 4PIG Sus scrofa cDNA 5', mRNA sequence						0.976374	0.991407	0.891678
GO:0051239	regulation of multicellular organismal process	CN164178	994302 MARC 4PIG Sus scrofa cDNA 5', mRNA sequence						0.976374	0.991407	0.891678
GO:0051239	regulation of multicellular organismal process	DV904076	POSM0605028_M02R porcine skeletal muscle cDNA library (PoSM) Sus scrofa cDNA 3', mRNA sequence						0.976374	0.991407	0.891678
GO:0051239	regulation of multicellular organismal process	DB788903	DB788903 full-length enriched swine cDNA library, adult adrenal gland Sus scrofa cDNA clone ADR010083F11 5', mRNA sequence						0.976374	0.991407	0.891678
GO:0032501	multicellular organismal process	AK240563.1	Sus scrofa mRNA, clone:UTR010098F11, expressed in uterus		NM_001165928.1	1605	DAG1	dystroglycan 1 (dystrophin-associated glycoprotein 1)	0.976398	0.991408	1.01487
GO:0032501	multicellular organismal process	AK235345.1	Sus scrofa mRNA, clone:OVRM10071B07, expressed in ovary		NM_004529.2	4300	MLLT3	myeloid/lymphoid or mixed-lineage leukemia (trithorax homolog, Drosophila); translocated to, 3	0.976398	0.991408	1.01487
GO:0032501	multicellular organismal process	AK236127.1	Sus scrofa mRNA, clone:OVRM10155A01, expressed in ovary		NM_001135654.1	8761	PABPC4	poly(A) binding protein, cytoplasmic 4 (inducible form)	0.976398	0.991408	1.01487
GO:0032501	multicellular organismal process	AK230559.1	Sus scrofa mRNA, clone:AMP010010A02, expressed in alveolar macrophage	----	BC064357.1	8301	PICALM	phosphatidylinositol binding clathrin assembly protein	0.976398	0.991408	1.01487
GO:0032501	multicellular organismal process	AK239436.1	Sus scrofa mRNA, clone:THY010103G12, expressed in thymus		NM_003803.3	8736	MYOM1	myomesin 1, 185kDa	0.976398	0.991408	1.01487
GO:0032501	multicellular organismal process	AK233000.1	Sus scrofa mRNA, clone:LVRM10065H01, expressed in liver		BC028234.1	8775	NAPA	N-ethylmaleimide-sensitive factor attachment protein, alpha	0.976398	0.991408	1.01487
GO:0032501	multicellular organismal process	AF329358.1	Sus scrofa laminin beta-1 chain mRNA, partial cds	LAMB1	NM_002291.2	3912	LAMB1	laminin, beta 1	0.976398	0.991408	1.01487
GO:0032501	multicellular organismal process	AY609606.1	Sus scrofa clone Clu_207459.scr.msk.p1.Contig1, mRNA sequence		NM_001128209.1	6444	SGCD	sarcoglycan, delta (35kDa dystrophin-associated glycoprotein)	0.976398	0.991408	1.01487
GO:0032501	multicellular organismal process	AY610166.1	Sus scrofa clone Clu_8309.scr.msk.p1.Contig3, mRNA sequence		BC010353.1	9200	PTPLA	protein tyrosine phosphatase-like (proline instead of catalytic arginine), member A	0.976398	0.991408	1.01487
GO:0032501	multicellular organismal process	AY610394.1	Sus scrofa clone reru31c_i7.y1.abd, mRNA sequence		NM_002495.2	4724	NDUFS4	NADH dehydrogenase (ubiquinone) Fe-S protein 4, 18kDa (NADH-coenzyme Q reductase)	0.976398	0.991408	1.01487
GO:0032501	multicellular organismal process	AY610481.1	Sus scrofa clone rspc006_d9.y1.abd, mRNA sequence		XM_001715053.2	100128328	LOC100128328	hypothetical LOC100128328	0.976398	0.991408	1.01487
GO:0032501	multicellular organismal process	BX665103	BX665103 Sus Scrofa library (scag) Sus scrofa cDNA clone scag0004.c.03 5prim, mRNA sequence						0.976398	0.991408	1.01487
GO:0032501	multicellular organismal process	BX667682	BX667682 Sus Scrofa library (scac) Sus scrofa cDNA clone scac0026.g.10 5prim, mRNA sequence						0.976398	0.991408	1.01487
GO:0032501	multicellular organismal process	BX672955	BX672955 Sus Scrofa library (scac) Sus scrofa cDNA clone scac0044.o.04 5prim, mRNA sequence						0.976398	0.991408	1.01487
GO:0032501	multicellular organismal process	BP158662	BP158662 full-length enriched swine cDNA library, adult spleen Sus scrofa cDNA clone SPL010018F11 5', mRNA sequence						0.976398	0.991408	1.01487
GO:0032501	multicellular organismal process	CK452762	908422 MARC 4PIG Sus scrofa cDNA 5', mRNA sequence						0.976398	0.991408	1.01487
GO:0032501	multicellular organismal process	CK454645	915140 MARC 4PIG Sus scrofa cDNA 5', mRNA sequence						0.976398	0.991408	1.01487
GO:0032501	multicellular organismal process	BX922054	BX922054 Sus Scrofa library (scan) Sus scrofa cDNA clone scan0023.e.20 5prim, mRNA sequence						0.976398	0.991408	1.01487
GO:0032501	multicellular organismal process	BX923538	BX923538 Sus Scrofa library (scan) Sus scrofa cDNA clone scan0014.h.08 5prim, mRNA sequence						0.976398	0.991408	1.01487
GO:0032501	multicellular organismal process	BX923548	BX923548 Sus Scrofa library (scan) Sus scrofa cDNA clone scan0012.k.22 5prim, mRNA sequence						0.976398	0.991408	1.01487
GO:0032501	multicellular organismal process	BX925993	BX925993 Sus Scrofa library (scan) Sus scrofa cDNA clone scan0021.f.19 5prim, mRNA sequence						0.976398	0.991408	1.01487
GO:0032501	multicellular organismal process	CN163858	993962 MARC 4PIG Sus scrofa cDNA 5', mRNA sequence						0.976398	0.991408	1.01487
GO:0032501	multicellular organismal process	CN164178	994302 MARC 4PIG Sus scrofa cDNA 5', mRNA sequence						0.976398	0.991408	1.01487
GO:0032501	multicellular organismal process	DN100858	1000249 MARC 4PIG Sus scrofa cDNA 5', mRNA sequence						0.976398	0.991408	1.01487
[truncated: 392 more rows]

## Sheet: LR2 vs LR1-down regulation
go_id	go_name	pig_Genebank	pig_Description	pig_Gene symbol	human_Genebank	human_Gene ID	human_Gene	human_Gene des	pvalue	FDR	enrichment
GO:0002376	immune system process	AK231444.1	Sus scrofa mRNA, clone:ITT010064F12, expressed in intestine		NM_138559.1	53335	BCL11A	B-cell CLL/lymphoma 11A (zinc finger protein)	0.00018592	1	0.352301
GO:0002376	immune system process	AK238747.1	Sus scrofa mRNA, clone:THY010026A04, expressed in thymus		AK225150.1	7462	LAT2	linker for activation of T cells family, member 2	0.00018592	1	0.352301
GO:0002376	immune system process	AK240146.1	Sus scrofa mRNA, clone:UTR010035C06, expressed in uterus	CXCL12	NM_199168.2	6387	CXCL12	chemokine (C-X-C motif) ligand 12 (stromal cell-derived factor 1)	0.00018592	1	0.352301
GO:0002376	immune system process	AY610379.1	Sus scrofa clone rese11c_b12.y1.abd, mRNA sequence		NM_018064.3	55122	AKIRIN2	akirin 2	0.00018592	1	0.352301
GO:0002376	immune system process	BX672328	BX672328 Sus Scrofa library (scac) Sus scrofa cDNA clone scac0036.i.23 3prim, mRNA sequence						0.00018592	1	0.352301
GO:0002376	immune system process	CN158867	947694 MARC 4PIG Sus scrofa cDNA 5', mRNA sequence						0.00018592	1	0.352301
GO:0002376	immune system process	DN132989	996429 MARC 4PIG Sus scrofa cDNA 5', mRNA sequence						0.00018592	1	0.352301
GO:0002376	immune system process	DV224291	EST-AR154H05 Porcine Peripheral Blood Cell cDNA library Sus scrofa cDNA clone AR154H05, mRNA sequence						0.00018592	1	0.352301
GO:0002376	immune system process	DY435434	1571483 MARC 3PIG Sus scrofa cDNA 3', mRNA sequence						0.00018592	1	0.352301
GO:0050896	response to stimulus	AK240553.1	Sus scrofa mRNA, clone:UTR010098A04, expressed in uterus		BC001766.1	6285	S100B	S100 calcium binding protein B	0.000333537	1	0.573242
GO:0050896	response to stimulus	AK235084.1	Sus scrofa mRNA, clone:OVRM10047G03, expressed in ovary		NM_001142423.1	9643	MORF4L2	mortality factor 4 like 2	0.000333537	1	0.573242
GO:0050896	response to stimulus	AK231559.1	Sus scrofa mRNA, clone:ITT010094B03, expressed in intestine		NM_004887.4	9547	CXCL14	chemokine (C-X-C motif) ligand 14	0.000333537	1	0.573242
GO:0050896	response to stimulus	AK231642.1	Sus scrofa mRNA, clone:LNG010004C07, expressed in lung		AK290956.1	81631	MAP1LC3B	microtubule-associated protein 1 light chain 3 beta	0.000333537	1	0.573242
GO:0050896	response to stimulus	AK238695.1	Sus scrofa mRNA, clone:THY010018B08, expressed in thymus		AK296700.1	8451	CUL4A	cullin 4A	0.000333537	1	0.573242
GO:0050896	response to stimulus	AK238706.1	Sus scrofa mRNA, clone:THY010019D09, expressed in thymus		AF087851.1	56925	LXN	latexin	0.000333537	1	0.573242
GO:0050896	response to stimulus	AK235833.1	Sus scrofa mRNA, clone:OVRM10119B05, expressed in ovary		NM_003766.3	8678	BECN1	beclin 1, autophagy related	0.000333537	1	0.573242
GO:0050896	response to stimulus	AK236110.1	Sus scrofa mRNA, clone:OVRM10153B12, expressed in ovary		AK289704.1	6117	RPA1	replication protein A1, 70kDa	0.000333537	1	0.573242
GO:0050896	response to stimulus	AK236143.1	Sus scrofa mRNA, clone:OVRM10156F12, expressed in ovary		NM_001145409.1	4841	NONO	non-POU domain containing, octamer-binding	0.000333537	1	0.573242
GO:0050896	response to stimulus	AK236453.1	Sus scrofa mRNA, clone:OVRM10194E05, expressed in ovary		BC018532.1	116496	FAM129A	family with sequence similarity 129, member A	0.000333537	1	0.573242
GO:0050896	response to stimulus	AK236599.1	Sus scrofa mRNA, clone:OVRM10207B02, expressed in ovary		AK312784.1	8883	NAE1	NEDD8 activating enzyme E1 subunit 1	0.000333537	1	0.573242
GO:0050896	response to stimulus	AK240146.1	Sus scrofa mRNA, clone:UTR010035C06, expressed in uterus	CXCL12	NM_199168.2	6387	CXCL12	chemokine (C-X-C motif) ligand 12 (stromal cell-derived factor 1)	0.000333537	1	0.573242
GO:0050896	response to stimulus	AJ583708.1	Sus scrofa partial mRNA for janus kinase 2 (JNK2 gene)	MAPK9	NM_139068.2	5601	MAPK9	mitogen-activated protein kinase 9	0.000333537	1	0.573242
GO:0050896	response to stimulus	AY609469.1	Sus scrofa clone Clu_126442.scr.msk.p1.Contig1, mRNA sequence		NM_001104647.1	55186	SLC25A36	solute carrier family 25, member 36	0.000333537	1	0.573242
GO:0050896	response to stimulus	AY609542.1	Sus scrofa clone Clu_1670.scr.msk.p1.Contig1, mRNA sequence		BC101834.1	9232	PTTG1	pituitary tumor-transforming 1	0.000333537	1	0.573242
GO:0050896	response to stimulus	AY610379.1	Sus scrofa clone rese11c_b12.y1.abd, mRNA sequence		NM_018064.3	55122	AKIRIN2	akirin 2	0.000333537	1	0.573242
GO:0050896	response to stimulus	DQ222847.1	Sus scrofa procollagen-lysine 2-oxoglutarate 5-dioxygenase 2 (Plod2) mRNA, partial cds	PLOD2	NM_182943.2	5352	PLOD2	procollagen-lysine, 2-oxoglutarate 5-dioxygenase 2	0.000333537	1	0.573242
GO:0050896	response to stimulus	BX672328	BX672328 Sus Scrofa library (scac) Sus scrofa cDNA clone scac0036.i.23 3prim, mRNA sequence						0.000333537	1	0.573242
GO:0050896	response to stimulus	BX674614	BX674614 Sus Scrofa library (scac) Sus scrofa cDNA clone scac0044.i.03 5prim, mRNA sequence						0.000333537	1	0.573242
GO:0050896	response to stimulus	CN158744	947555 MARC 4PIG Sus scrofa cDNA 5', mRNA sequence						0.000333537	1	0.573242
GO:0050896	response to stimulus	CN158867	947694 MARC 4PIG Sus scrofa cDNA 5', mRNA sequence						0.000333537	1	0.573242
GO:0050896	response to stimulus	CN164041	994156 MARC 4PIG Sus scrofa cDNA 5', mRNA sequence						0.000333537	1	0.573242
GO:0050896	response to stimulus	CJ030827	CJ030827 full-length enriched swine cDNA library, adult testis Sus scrofa cDNA clone TES01G110012 5', mRNA sequence						0.000333537	1	0.573242
GO:0050896	response to stimulus	DN101612	1096447 MARC 4PIG Sus scrofa cDNA 5', mRNA sequence						0.000333537	1	0.573242
GO:0050896	response to stimulus	DN114435	1113804 MARC 4PIG Sus scrofa cDNA 5', mRNA sequence						0.000333537	1	0.573242
GO:0050896	response to stimulus	DN117645	1117334 MARC 4PIG Sus scrofa cDNA 3', mRNA sequence						0.000333537	1	0.573242
GO:0050896	response to stimulus	BW961291	BW961291 full-length enriched swine cDNA library, adult alveolar macrophage Sus scrofa cDNA clone AMP010086G03 5', mRNA sequence						0.000333537	1	0.573242
GO:0050896	response to stimulus	AJ964761	AJ964761 KN404_2 Sus scrofa cDNA clone C0007757i12 5', mRNA sequence						0.000333537	1	0.573242
GO:0050896	response to stimulus	DV224291	EST-AR154H05 Porcine Peripheral Blood Cell cDNA library Sus scrofa cDNA clone AR154H05, mRNA sequence						0.000333537	1	0.573242
GO:0050896	response to stimulus	DY435434	1571483 MARC 3PIG Sus scrofa cDNA 3', mRNA sequence						0.000333537	1	0.573242
GO:0050896	response to stimulus	DB789553	DB789553 full-length enriched swine cDNA library, adult adrenal gland Sus scrofa cDNA clone ADR010091B04 5', mRNA sequence						0.000333537	1	0.573242
GO:0050896	response to stimulus	DB803676	DB803676 full-length enriched swine cDNA library, adult skin Sus scrofa cDNA clone SKNB10061E02 5', mRNA sequence						0.000333537	1	0.573242
GO:0050896	response to stimulus	BF190991	237683 MARC 2PIG Sus scrofa cDNA 5', mRNA sequence						0.000333537	1	0.573242
GO:0051604	protein maturation	CK451467	904644 MARC 4PIG Sus scrofa cDNA 5', mRNA sequence						0.00178709	1	5.92061
GO:0051604	protein maturation	CN161855	951185 MARC 4PIG Sus scrofa cDNA 5', mRNA sequence						0.00178709	1	5.92061
GO:0051604	protein maturation	DN116500	1116075 MARC 4PIG Sus scrofa cDNA 5', mRNA sequence						0.00178709	1	5.92061
GO:0051604	protein maturation	DT322069	SusFleck_BFN_0009_0012_5_pCNS_M07 SusFleck Backfat Normalized Sus scrofa cDNA clone 0009_0012_M07 5', mRNA sequence						0.00178709	1	5.92061
GO:0051604	protein maturation	EW387080	rmed15c_f16.y1 med Sus scrofa cDNA 5', mRNA sequence						0.00178709	1	5.92061
GO:0006952	defense response	AY610379.1	Sus scrofa clone rese11c_b12.y1.abd, mRNA sequence		NM_018064.3	55122	AKIRIN2	akirin 2	0.00223862	1	0.239485
GO:0006952	defense response	DY435434	1571483 MARC 3PIG Sus scrofa cDNA 3', mRNA sequence						0.00223862	1	0.239485
GO:0006952	defense response	DB803676	DB803676 full-length enriched swine cDNA library, adult skin Sus scrofa cDNA clone SKNB10061E02 5', mRNA sequence						0.00223862	1	0.239485
GO:0006950	response to stress	AK235084.1	Sus scrofa mRNA, clone:OVRM10047G03, expressed in ovary		NM_001142423.1	9643	MORF4L2	mortality factor 4 like 2	0.00257153	1	0.536739
GO:0006950	response to stress	AK231642.1	Sus scrofa mRNA, clone:LNG010004C07, expressed in lung		AK290956.1	81631	MAP1LC3B	microtubule-associated protein 1 light chain 3 beta	0.00257153	1	0.536739
GO:0006950	response to stress	AK238695.1	Sus scrofa mRNA, clone:THY010018B08, expressed in thymus		AK296700.1	8451	CUL4A	cullin 4A	0.00257153	1	0.536739
GO:0006950	response to stress	AK236110.1	Sus scrofa mRNA, clone:OVRM10153B12, expressed in ovary		AK289704.1	6117	RPA1	replication protein A1, 70kDa	0.00257153	1	0.536739
GO:0006950	response to stress	AK236143.1	Sus scrofa mRNA, clone:OVRM10156F12, expressed in ovary		NM_001145409.1	4841	NONO	non-POU domain containing, octamer-binding	0.00257153	1	0.536739
GO:0006950	response to stress	AK236453.1	Sus scrofa mRNA, clone:OVRM10194E05, expressed in ovary		BC018532.1	116496	FAM129A	family with sequence similarity 129, member A	0.00257153	1	0.536739
GO:0006950	response to stress	AK236599.1	Sus scrofa mRNA, clone:OVRM10207B02, expressed in ovary		AK312784.1	8883	NAE1	NEDD8 activating enzyme E1 subunit 1	0.00257153	1	0.536739
GO:0006950	response to stress	AJ583708.1	Sus scrofa partial mRNA for janus kinase 2 (JNK2 gene)	MAPK9	NM_139068.2	5601	MAPK9	mitogen-activated protein kinase 9	0.00257153	1	0.536739
GO:0006950	response to stress	AY609542.1	Sus scrofa clone Clu_1670.scr.msk.p1.Contig1, mRNA sequence		BC101834.1	9232	PTTG1	pituitary tumor-transforming 1	0.00257153	1	0.536739
GO:0006950	response to stress	AY610379.1	Sus scrofa clone rese11c_b12.y1.abd, mRNA sequence		NM_018064.3	55122	AKIRIN2	akirin 2	0.00257153	1	0.536739
GO:0006950	response to stress	DQ222847.1	Sus scrofa procollagen-lysine 2-oxoglutarate 5-dioxygenase 2 (Plod2) mRNA, partial cds	PLOD2	NM_182943.2	5352	PLOD2	procollagen-lysine, 2-oxoglutarate 5-dioxygenase 2	0.00257153	1	0.536739
GO:0006950	response to stress	CN164041	994156 MARC 4PIG Sus scrofa cDNA 5', mRNA sequence						0.00257153	1	0.536739
GO:0006950	response to stress	DN114435	1113804 MARC 4PIG Sus scrofa cDNA 5', mRNA sequence						0.00257153	1	0.536739
GO:0006950	response to stress	DN117645	1117334 MARC 4PIG Sus scrofa cDNA 3', mRNA sequence						0.00257153	1	0.536739
GO:0006950	response to stress	BW961291	BW961291 full-length enriched swine cDNA library, adult alveolar macrophage Sus scrofa cDNA clone AMP010086G03 5', mRNA sequence						0.00257153	1	0.536739
GO:0006950	response to stress	AJ964761	AJ964761 KN404_2 Sus scrofa cDNA clone C0007757i12 5', mRNA sequence						0.00257153	1	0.536739
GO:0006950	response to stress	DY435434	1571483 MARC 3PIG Sus scrofa cDNA 3', mRNA sequence						0.00257153	1	0.536739
GO:0006950	response to stress	DB803676	DB803676 full-length enriched swine cDNA library, adult skin Sus scrofa cDNA clone SKNB10061E02 5', mRNA sequence						0.00257153	1	0.536739
GO:0006950	response to stress	BF190991	237683 MARC 2PIG Sus scrofa cDNA 5', mRNA sequence						0.00257153	1	0.536739
GO:0043062	extracellular structure organization	AK240222.1	Sus scrofa mRNA, clone:UTR010042B08, expressed in uterus		AK301557.1	5747	PTK2	PTK2 protein tyrosine kinase 2	0.00501169	1	3.24788
GO:0043062	extracellular structure organization	AB271920.1	Sus scrofa ADAMTS20 mRNA for ADAM metallopeptidase with thrombospondin type 1 motif 20, partial cds	ADAMTS20	NM_025003.3	80070	ADAMTS20	ADAM metallopeptidase with thrombospondin type 1 motif, 20	0.00501169	1	3.24788
GO:0043062	extracellular structure organization	CJ024171	CJ024171 full-length enriched swine cDNA library, adult trachea Sus scrofa cDNA clone TCH01A020024 5', mRNA sequence						0.00501169	1	3.24788
GO:0043062	extracellular structure organization	DN117645	1117334 MARC 4PIG Sus scrofa cDNA 3', mRNA sequence						0.00501169	1	3.24788
GO:0043062	extracellular structure organization	BW966089	BW966089 full-length enriched swine cDNA library, adult ovary Sus scrofa cDNA clone OVR010073A03 5', mRNA sequence						0.00501169	1	3.24788
GO:0043062	extracellular structure organization	DB789553	DB789553 full-length enriched swine cDNA library, adult adrenal gland Sus scrofa cDNA clone ADR010091B04 5', mRNA sequence						0.00501169	1	3.24788
GO:0043062	extracellular structure organization	DB805308	DB805308 full-length enriched swine cDNA library, adult skin Sus scrofa cDNA clone SKNB10087A12 5', mRNA sequence	COL1A2					0.00501169	1	3.24788
GO:0043062	extracellular structure organization	DT322380	SusFleck_BF_0053_0056_5_pCNS_L06 SusFleck Backfat Sus scrofa cDNA clone 0053_0056_L06 5', mRNA sequence						0.00501169	1	3.24788
GO:0030198	extracellular matrix organization	AK240222.1	Sus scrofa mRNA, clone:UTR010042B08, expressed in uterus		AK301557.1	5747	PTK2	PTK2 protein tyrosine kinase 2	0.00537299	1	3.55237
GO:0030198	extracellular matrix organization	AB271920.1	Sus scrofa ADAMTS20 mRNA for ADAM metallopeptidase with thrombospondin type 1 motif 20, partial cds	ADAMTS20	NM_025003.3	80070	ADAMTS20	ADAM metallopeptidase with thrombospondin type 1 motif, 20	0.00537299	1	3.55237
GO:0030198	extracellular matrix organization	CJ024171	CJ024171 full-length enriched swine cDNA library, adult trachea Sus scrofa cDNA clone TCH01A020024 5', mRNA sequence						0.00537299	1	3.55237
GO:0030198	extracellular matrix organization	DN117645	1117334 MARC 4PIG Sus scrofa cDNA 3', mRNA sequence						0.00537299	1	3.55237
GO:0030198	extracellular matrix organization	BW966089	BW966089 full-length enriched swine cDNA library, adult ovary Sus scrofa cDNA clone OVR010073A03 5', mRNA sequence						0.00537299	1	3.55237
GO:0030198	extracellular matrix organization	DB805308	DB805308 full-length enriched swine cDNA library, adult skin Sus scrofa cDNA clone SKNB10087A12 5', mRNA sequence	COL1A2					0.00537299	1	3.55237
GO:0030198	extracellular matrix organization	DT322380	SusFleck_BF_0053_0056_5_pCNS_L06 SusFleck Backfat Sus scrofa cDNA clone 0053_0056_L06 5', mRNA sequence						0.00537299	1	3.55237
GO:0042592	homeostatic process	AK240146.1	Sus scrofa mRNA, clone:UTR010035C06, expressed in uterus	CXCL12	NM_199168.2	6387	CXCL12	chemokine (C-X-C motif) ligand 12 (stromal cell-derived factor 1)	0.00651344	1	0.210511
GO:0042592	homeostatic process	BP144557	BP144557 full-length enriched swine cDNA library, adult ovary Sus scrofa cDNA clone OVR010019H05 5', mRNA sequence						0.00651344	1	0.210511
GO:0006357	regulation of transcription from RNA polymerase II promoter	AK240476.1	Sus scrofa mRNA, clone:UTR010080B01, expressed in uterus		AC106818.2	100313887	MIR2277	microRNA 2277	0.00813391	1	0.355237
GO:0006357	regulation of transcription from RNA polymerase II promoter	EU780792.1	Sus scrofa CHD3-like protein mRNA, partial cds	CHD3	AK125928.1	1107	CHD3	chromodomain helicase DNA binding protein 3	0.00813391	1	0.355237
GO:0006357	regulation of transcription from RNA polymerase II promoter	BX674614	BX674614 Sus Scrofa library (scac) Sus scrofa cDNA clone scac0044.i.03 5prim, mRNA sequence						0.00813391	1	0.355237
GO:0006357	regulation of transcription from RNA polymerase II promoter	CN158867	947694 MARC 4PIG Sus scrofa cDNA 5', mRNA sequence						0.00813391	1	0.355237
GO:0006357	regulation of transcription from RNA polymerase II promoter	EW077800	rebs23c_l2.y1 ebs Sus scrofa cDNA 5', mRNA sequence						0.00813391	1	0.355237
GO:0019752	carboxylic acid metabolic process	AK231080.1	Sus scrofa mRNA, clone:AMP010090H08, expressed in alveolar macrophage		NM_002887.3	5917	RARS	arginyl-tRNA synthetase	0.00816531	1	0.319314
GO:0006082	organic acid metabolic process	AK231080.1	Sus scrofa mRNA, clone:AMP010090H08, expressed in alveolar macrophage		NM_002887.3	5917	RARS	arginyl-tRNA synthetase	0.00816531	1	0.319314
GO:0019752	carboxylic acid metabolic process	CK462628	933439 MARC 4PIG Sus scrofa cDNA 5', mRNA sequence						0.00816531	1	0.319314
GO:0006082	organic acid metabolic process	CK462628	933439 MARC 4PIG Sus scrofa cDNA 5', mRNA sequence						0.00816531	1	0.319314
GO:0006082	organic acid metabolic process	DT330028	SusFleck_BF_0021_0024_5_pCNS_E05 SusFleck Backfat Sus scrofa cDNA clone 0021_0024_E05 5', mRNA sequence						0.00816531	1	0.319314
GO:0019752	carboxylic acid metabolic process	DT330028	SusFleck_BF_0021_0024_5_pCNS_E05 SusFleck Backfat Sus scrofa cDNA clone 0021_0024_E05 5', mRNA sequence						0.00816531	1	0.319314
GO:0006082	organic acid metabolic process	EV934963	rche27_c13.y1 che Sus scrofa cDNA 5', mRNA sequence						0.00816531	1	0.319314
GO:0019752	carboxylic acid metabolic process	EV934963	rche27_c13.y1 che Sus scrofa cDNA 5', mRNA sequence						0.00816531	1	0.319314
GO:0006631	fatty acid metabolic process	EV934963	rche27_c13.y1 che Sus scrofa cDNA 5', mRNA sequence						0.0122268	1	0.14353
GO:0008380	RNA splicing	AK234260.1	Sus scrofa mRNA, clone:OVR010034E07, expressed in ovary		NM_005804.2	10212	DDX39	DEAD (Asp-Glu-Ala-Asp) box polypeptide 39	0.0153987	1	1.79867
GO:0008380	RNA splicing	AK231305.1	Sus scrofa mRNA, clone:ITT010034B04, expressed in intestine		NM_006842.2	10992	SF3B2	splicing factor 3b, subunit 2, 145kDa	0.0153987	1	1.79867
GO:0008380	RNA splicing	AK235325.1	Sus scrofa mRNA, clone:OVRM10069A02, expressed in ovary	SFRS2	BC001303.2	6427	SFRS2	splicing factor, arginine/serine-rich 2	0.0153987	1	1.79867
GO:0008380	RNA splicing	AK238610.1	Sus scrofa mRNA, clone:THY010006E03, expressed in thymus		NM_022157.2	64121	RRAGC	Ras-related GTP binding C	0.0153987	1	1.79867
GO:0008380	RNA splicing	AK236143.1	Sus scrofa mRNA, clone:OVRM10156F12, expressed in ovary		NM_001145409.1	4841	NONO	non-POU domain containing, octamer-binding	0.0153987	1	1.79867
GO:0008380	RNA splicing	AK236292.1	Sus scrofa mRNA, clone:OVRM10174A06, expressed in ovary		AF103802.4	10181	RBM5	RNA binding motif protein 5	0.0153987	1	1.79867
GO:0008380	RNA splicing	AK236478.1	Sus scrofa mRNA, clone:OVRM10196F03, expressed in ovary		NM_006109.3	10419	PRMT5	protein arginine methyltransferase 5	0.0153987	1	1.79867
GO:0008380	RNA splicing	AK239758.1	Sus scrofa mRNA, clone:THY010202F07, expressed in thymus		BC108316.1	10921	RNPS1	RNA binding protein S1, serine-rich domain	0.0153987	1	1.79867
GO:0008380	RNA splicing	AK233207.1	Sus scrofa mRNA, clone:LVRM10101D10, expressed in liver		BC126114.1	51362	CDC40	cell division cycle 40 homolog (S. cerevisiae)	0.0153987	1	1.79867
GO:0008380	RNA splicing	AK237326.1	Sus scrofa mRNA, clone:SPL010024D05, expressed in spleen		NM_005782.3	10189	THOC4	THO complex 4	0.0153987	1	1.79867
GO:0008380	RNA splicing	AY610488.1	Sus scrofa clone rsto220_i4.y1.abd, mRNA sequence		BC106055.1	6637	SNRPG	small nuclear ribonucleoprotein polypeptide G	0.0153987	1	1.79867
GO:0008380	RNA splicing	BX666496	BX666496 Sus Scrofa library (scag) Sus scrofa cDNA clone scag0003.h.04 3prim, mRNA sequence						0.0153987	1	1.79867
GO:0008380	RNA splicing	BX669885	BX669885 Sus Scrofa library (scac) Sus scrofa cDNA clone scac0030.p.08 5prim, mRNA sequence						0.0153987	1	1.79867
GO:0008380	RNA splicing	BX915153	BX915153 Sus Scrofa library (scan) Sus scrofa cDNA clone scan0028.c.09 5prim, mRNA sequence						0.0153987	1	1.79867
GO:0008380	RNA splicing	BX920265	BX920265 Sus Scrofa library (scan) Sus scrofa cDNA clone scan0003.b.15 5prim, mRNA sequence						0.0153987	1	1.79867
GO:0008380	RNA splicing	DN100864	1000255 MARC 4PIG Sus scrofa cDNA 5', mRNA sequence						0.0153987	1	1.79867
GO:0008380	RNA splicing	DN124094	1124886 MARC 4PIG Sus scrofa cDNA 5', mRNA sequence						0.0153987	1	1.79867
GO:0008380	RNA splicing	CX058800	PDUts2028C12 Porcine testis cDNA library II Sus scrofa cDNA clone PDUts2028C12 5' similar to homologue to emb|BX571764.1| Homo sapiens mRNA; cDNA DKFZp686J01190 (from clone DKFZp686J01190), mRNA sequence						0.0153987	1	1.79867
GO:0008380	RNA splicing	BF702205	MI-P-A2-aaq-b-11-1-UM.s1 MI-P-A2 Sus scrofa cDNA clone MI-P-A2-aaq-b-11-1-UM 3', mRNA sequence						0.0153987	1	1.79867
GO:0008380	RNA splicing	BI182545	UNL-P-FN-bj-f-12-0-UNL.s1 UNL-P-FN Sus scrofa cDNA clone UNL-P-FN-bj-f-12-0-UNL 3', mRNA sequence						0.0153987	1	1.79867
GO:0006954	inflammatory response	DY435434	1571483 MARC 3PIG Sus scrofa cDNA 3', mRNA sequence						0.0158215	1	0.236824
GO:0006954	inflammatory response	DB803676	DB803676 full-length enriched swine cDNA library, adult skin Sus scrofa cDNA clone SKNB10061E02 5', mRNA sequence						0.0158215	1	0.236824
GO:0032787	monocarboxylic acid metabolic process	DT330028	SusFleck_BF_0021_0024_5_pCNS_E05 SusFleck Backfat Sus scrofa cDNA clone 0021_0024_E05 5', mRNA sequence						0.0158215	1	0.236824
GO:0032787	monocarboxylic acid metabolic process	EV934963	rche27_c13.y1 che Sus scrofa cDNA 5', mRNA sequence						0.0158215	1	0.236824
GO:0006810	transport	AK230713.1	Sus scrofa mRNA, clone:AMP010030A10, expressed in alveolar macrophage		NM_004724.2	9183	ZW10	ZW10, kinetochore associated, homolog (Drosophila)	0.0172814	1	0.735216
GO:0006810	transport	AK234218.1	Sus scrofa mRNA, clone:OVR010028H07, expressed in ovary		BC014620.2	9784	SNX17	sorting nexin 17	0.0172814	1	0.735216
GO:0006810	transport	AK234260.1	Sus scrofa mRNA, clone:OVR010034E07, expressed in ovary		NM_005804.2	10212	DDX39	DEAD (Asp-Glu-Ala-Asp) box polypeptide 39	0.0172814	1	0.735216
GO:0006810	transport	AK240498.1	Sus scrofa mRNA, clone:UTR010084A05, expressed in uterus		NM_001001132.1	6453	ITSN1	intersectin 1 (SH3 domain protein)	0.0172814	1	0.735216
GO:0006810	transport	AK230846.1	Sus scrofa mRNA, clone:AMP010052G09, expressed in alveolar macrophage		NM_006178.2	4905	NSF	N-ethylmaleimide-sensitive factor	0.0172814	1	0.735216
GO:0006810	transport	AK234779.1	Sus scrofa mRNA, clone:OVRM10015E04, expressed in ovary		BX571747.1	5861	RAB1A	RAB1A, member RAS oncogene family	0.0172814	1	0.735216
GO:0006810	transport	AK231527.1	Sus scrofa mRNA, clone:ITT010086F03, expressed in intestine	CLTC	NM_004859.3	1213	CLTC	clathrin, heavy chain (Hc)	0.0172814	1	0.735216
GO:0006810	transport	AK235006.1	Sus scrofa mRNA, clone:OVRM10040D09, expressed in ovary		AK303453.1	57222	ERGIC1	endoplasmic reticulum-golgi intermediate compartment (ERGIC) 1	0.0172814	1	0.735216
GO:0006810	transport	AK235372.1	Sus scrofa mRNA, clone:OVRM10074D12, expressed in ovary		NM_178450.3	115123	2010-03-03	membrane-associated ring finger (C3HC4) 3	0.0172814	1	0.735216
GO:0006810	transport	AK238616.1	Sus scrofa mRNA, clone:THY010007C03, expressed in thymus		NM_001619.3	156	ADRBK1	adrenergic, beta, receptor kinase 1	0.0172814	1	0.735216
GO:0006810	transport	AK238752.1	Sus scrofa mRNA, clone:THY010026C01, expressed in thymus		NM_006496.2	2773	GNAI3	guanine nucleotide binding protein (G protein), alpha inhibiting activity polypeptide 3	0.0172814	1	0.735216
GO:0006810	transport	AK235957.1	Sus scrofa mRNA, clone:OVRM10128H08, expressed in ovary		NM_006363.4	10483	SEC23B	Sec23 homolog B (S. cerevisiae)	0.0172814	1	0.735216
GO:0006810	transport	AK238761.1	Sus scrofa mRNA, clone:THY010027A06, expressed in thymus		NM_003795.4	8724	SNX3	sorting nexin 3	0.0172814	1	0.735216
GO:0006810	transport	AK238862.1	Sus scrofa mRNA, clone:THY010039B06, expressed in thymus	LOC100157342	NM_006815.3	10959	TMED2	transmembrane emp24 domain trafficking protein 2	0.0172814	1	0.735216
GO:0006810	transport	AK232649.1	Sus scrofa mRNA, clone:LVR010105F03, expressed in liver		NM_177424.2	23673	STX12	syntaxin 12	0.0172814	1	0.735216
GO:0006810	transport	AK236089.1	Sus scrofa mRNA, clone:OVRM10151D07, expressed in ovary		BC098565.1	6455	SH3GL1	SH3-domain GRB2-like 1	0.0172814	1	0.735216
GO:0006810	transport	AK239055.1	Sus scrofa mRNA, clone:THY010059F11, expressed in thymus		NM_207396.2	388591	RNF207	ring finger protein 207	0.0172814	1	0.735216
GO:0006810	transport	AK239290.1	Sus scrofa mRNA, clone:THY010089B12, expressed in thymus		AK090933.1	27230	SERP1	stress-associated endoplasmic reticulum protein 1	0.0172814	1	0.735216
GO:0006810	transport	AK236407.1	Sus scrofa mRNA, clone:OVRM10189A11, expressed in ovary		AK295969.1	55129	ANO10	anoctamin 10	0.0172814	1	0.735216
GO:0006810	transport	AY609692.1	Sus scrofa clone Clu_26048.scr.msk.p1.Contig1, mRNA sequence		NM_024844.3	79902	NUP85	nucleoporin 85kDa	0.0172814	1	0.735216
GO:0006810	transport	AF120099.1	Sus scrofa chloride-bicarbonate anion exchanger AE2 (AE2) mRNA, partial cds	SLC4A2	AK295767.1	6522	SLC4A2	solute carrier family 4, anion exchanger, member 2 (erythrocyte membrane protein band 3-like 1)	0.0172814	1	0.735216
GO:0006810	transport	CF787137	855007 MARC 4PIG Sus scrofa cDNA 5', mRNA sequence						0.0172814	1	0.735216
GO:0006810	transport	BX674049	BX674049 Sus Scrofa library (scac) Sus scrofa cDNA clone scac0038.d.17 5prim, mRNA sequence						0.0172814	1	0.735216
GO:0006810	transport	BP144557	BP144557 full-length enriched swine cDNA library, adult ovary Sus scrofa cDNA clone OVR010019H05 5', mRNA sequence						0.0172814	1	0.735216
GO:0006810	transport	CK453173	908865 MARC 4PIG Sus scrofa cDNA 5', mRNA sequence						0.0172814	1	0.735216
GO:0006810	transport	BX915138	BX915138 Sus Scrofa library (scan) Sus scrofa cDNA clone scan0028.b.09 5prim, mRNA sequence						0.0172814	1	0.735216
GO:0006810	transport	BX918946	BX918946 Sus Scrofa library (scan) Sus scrofa cDNA clone scan0010.k.23 5prim, mRNA sequence						0.0172814	1	0.735216
GO:0006810	transport	BX918999	BX918999 Sus Scrofa library (scan) Sus scrofa cDNA clone scan0004.p.09 5prim, mRNA sequence						0.0172814	1	0.735216
GO:0006810	transport	BX919363	BX919363 Sus Scrofa library (scan) Sus scrofa cDNA clone scan0002.j.24 5prim, mRNA sequence						0.0172814	1	0.735216
GO:0006810	transport	BX920228	BX920228 Sus Scrofa library (scan) Sus scrofa cDNA clone scan0002.m.24 5prim, mRNA sequence						0.0172814	1	0.735216
GO:0006810	transport	BX925865	BX925865 Sus Scrofa library (scan) Sus scrofa cDNA clone scan0018.p.03 5prim, mRNA sequence						0.0172814	1	0.735216
GO:0006810	transport	CN157619	946337 MARC 4PIG Sus scrofa cDNA 5', mRNA sequence						0.0172814	1	0.735216
GO:0006810	transport	CN161855	951185 MARC 4PIG Sus scrofa cDNA 5', mRNA sequence						0.0172814	1	0.735216
GO:0006810	transport	CN162365	951745 MARC 4PIG Sus scrofa cDNA 5', mRNA sequence						0.0172814	1	0.735216
GO:0006810	transport	DN101612	1096447 MARC 4PIG Sus scrofa cDNA 5', mRNA sequence						0.0172814	1	0.735216
GO:0006810	transport	DN107015	1104431 MARC 4PIG Sus scrofa cDNA 5', mRNA sequence						0.0172814	1	0.735216
GO:0006810	transport	DN109161	1106726 MARC 4PIG Sus scrofa cDNA 5', mRNA sequence						0.0172814	1	0.735216
GO:0006810	transport	DN109213	1106782 MARC 4PIG Sus scrofa cDNA 5', mRNA sequence						0.0172814	1	0.735216
GO:0006810	transport	DN112862	1112089 MARC 4PIG Sus scrofa cDNA 3', mRNA sequence						0.0172814	1	0.735216
GO:0006810	transport	DN134303	999500 MARC 4PIG Sus scrofa cDNA 5', mRNA sequence						0.0172814	1	0.735216
GO:0006810	transport	CR940070	CR940070 Sus scrofa cDNA library (scaj) Sus scrofa cDNA clone scaj0018.n.14 5prim, mRNA sequence						0.0172814	1	0.735216
GO:0006810	transport	BW973179	BW973179 full-length enriched swine cDNA library, adult periphral blood mononuclear cell Sus scrofa cDNA clone PBL010079D03 5', mRNA sequence						0.0172814	1	0.735216
GO:0006810	transport	AJ946210	AJ946210 CSEQRAN17 Sus scrofa cDNA clone C0007320a05 5', mRNA sequence						0.0172814	1	0.735216
GO:0006810	transport	CV873038	PDUts1109G12 Porcine testis cDNA library I Sus scrofa cDNA clone PDUts1109G12 5', mRNA sequence						0.0172814	1	0.735216
GO:0006810	transport	DY425348	1544279 MARC 3PIG Sus scrofa cDNA 5', mRNA sequence						0.0172814	1	0.735216
GO:0006810	transport	DB803676	DB803676 full-length enriched swine cDNA library, adult skin Sus scrofa cDNA clone SKNB10061E02 5', mRNA sequence						0.0172814	1	0.735216
GO:0006810	transport	AK234877	Sus scrofa mRNA, clone:OVRM10025H02, expressed in ovary	LOC100154310	NM_005984.2	6576	SLC25A1	solute carrier family 25 (mitochondrial carrier; citrate transporter), member 1	0.0172814	1	0.735216
GO:0006810	transport	DT322069	SusFleck_BFN_0009_0012_5_pCNS_M07 SusFleck Backfat Normalized Sus scrofa cDNA clone 0009_0012_M07 5', mRNA sequence						0.0172814	1	0.735216
GO:0006810	transport	EW086062	recc2803c_i15.y1 ecc Sus scrofa cDNA 5', mRNA sequence						0.0172814	1	0.735216
GO:0006810	transport	EW101413	reep26c_l9.y1 eep Sus scrofa cDNA 5', mRNA sequence						0.0172814	1	0.735216
GO:0006810	transport	EW422118	rnca31b_h5.y1 nca Sus scrofa cDNA 5', mRNA sequence						0.0172814	1	0.735216
GO:0006810	transport	BI186233	UNL-P-FN-ce-f-01-0-UNL.s2 UNL-P-FN Sus scrofa cDNA clone UNL-P-FN-ce-f-01-0-UNL 3', mRNA sequence						0.0172814	1	0.735216
GO:0051179	localization	AK230713.1	Sus scrofa mRNA, clone:AMP010030A10, expressed in alveolar macrophage		NM_004724.2	9183	ZW10	ZW10, kinetochore associated, homolog (Drosophila)	0.0191834	1	0.75635
GO:0051179	localization	AK234218.1	Sus scrofa mRNA, clone:OVR010028H07, expressed in ovary		BC014620.2	9784	SNX17	sorting nexin 17	0.0191834	1	0.75635
GO:0051179	localization	AK234260.1	Sus scrofa mRNA, clone:OVR010034E07, expressed in ovary		NM_005804.2	10212	DDX39	DEAD (Asp-Glu-Ala-Asp) box polypeptide 39	0.0191834	1	0.75635
GO:0051179	localization	AK240476.1	Sus scrofa mRNA, clone:UTR010080B01, expressed in uterus		AC106818.2	100313887	MIR2277	microRNA 2277	0.0191834	1	0.75635
GO:0051179	localization	AK240498.1	Sus scrofa mRNA, clone:UTR010084A05, expressed in uterus		NM_001001132.1	6453	ITSN1	intersectin 1 (SH3 domain protein)	0.0191834	1	0.75635
GO:0051179	localization	AK230846.1	Sus scrofa mRNA, clone:AMP010052G09, expressed in alveolar macrophage		NM_006178.2	4905	NSF	N-ethylmaleimide-sensitive factor	0.0191834	1	0.75635
GO:0051179	localization	AK234779.1	Sus scrofa mRNA, clone:OVRM10015E04, expressed in ovary		BX571747.1	5861	RAB1A	RAB1A, member RAS oncogene family	0.0191834	1	0.75635
GO:0051179	localization	AK231527.1	Sus scrofa mRNA, clone:ITT010086F03, expressed in intestine	CLTC	NM_004859.3	1213	CLTC	clathrin, heavy chain (Hc)	0.0191834	1	0.75635
GO:0051179	localization	AK235006.1	Sus scrofa mRNA, clone:OVRM10040D09, expressed in ovary		AK303453.1	57222	ERGIC1	endoplasmic reticulum-golgi intermediate compartment (ERGIC) 1	0.0191834	1	0.75635
GO:0051179	localization	AK235372.1	Sus scrofa mRNA, clone:OVRM10074D12, expressed in ovary		NM_178450.3	115123	3-Mar	membrane-associated ring finger (C3HC4) 3	0.0191834	1	0.75635
GO:0051179	localization	AK238616.1	Sus scrofa mRNA, clone:THY010007C03, expressed in thymus		NM_001619.3	156	ADRBK1	adrenergic, beta, receptor kinase 1	0.0191834	1	0.75635
GO:0051179	localization	AK238752.1	Sus scrofa mRNA, clone:THY010026C01, expressed in thymus		NM_006496.2	2773	GNAI3	guanine nucleotide binding protein (G protein), alpha inhibiting activity polypeptide 3	0.0191834	1	0.75635
GO:0051179	localization	AK235957.1	Sus scrofa mRNA, clone:OVRM10128H08, expressed in ovary		NM_006363.4	10483	SEC23B	Sec23 homolog B (S. cerevisiae)	0.0191834	1	0.75635
GO:0051179	localization	AK238761.1	Sus scrofa mRNA, clone:THY010027A06, expressed in thymus		NM_003795.4	8724	SNX3	sorting nexin 3	0.0191834	1	0.75635
GO:0051179	localization	AK238862.1	Sus scrofa mRNA, clone:THY010039B06, expressed in thymus	LOC100157342	NM_006815.3	10959	TMED2	transmembrane emp24 domain trafficking protein 2	0.0191834	1	0.75635
GO:0051179	localization	AK232649.1	Sus scrofa mRNA, clone:LVR010105F03, expressed in liver		NM_177424.2	23673	STX12	syntaxin 12	0.0191834	1	0.75635
GO:0051179	localization	AK236089.1	Sus scrofa mRNA, clone:OVRM10151D07, expressed in ovary		BC098565.1	6455	SH3GL1	SH3-domain GRB2-like 1	0.0191834	1	0.75635
GO:0051179	localization	AK239055.1	Sus scrofa mRNA, clone:THY010059F11, expressed in thymus		NM_207396.2	388591	RNF207	ring finger protein 207	0.0191834	1	0.75635
GO:0051179	localization	AK239290.1	Sus scrofa mRNA, clone:THY010089B12, expressed in thymus		AK090933.1	27230	SERP1	stress-associated endoplasmic reticulum protein 1	0.0191834	1	0.75635
GO:0051179	localization	AK230551.1	Sus scrofa mRNA, clone:AMP010009B06, expressed in alveolar macrophage	----	AK291610.1	8697	CDC23	cell division cycle 23 homolog (S. cerevisiae)	0.0191834	1	0.75635
GO:0051179	localization	AK236407.1	Sus scrofa mRNA, clone:OVRM10189A11, expressed in ovary		AK295969.1	55129	ANO10	anoctamin 10	0.0191834	1	0.75635
GO:0051179	localization	AK233462.1	Sus scrofa mRNA, clone:LVRM10152C10, expressed in liver		BC009545.1	9638	FEZ1	fasciculation and elongation protein zeta 1 (zygin I)	0.0191834	1	0.75635
GO:0051179	localization	AK240222.1	Sus scrofa mRNA, clone:UTR010042B08, expressed in uterus		AK301557.1	5747	PTK2	PTK2 protein tyrosine kinase 2	0.0191834	1	0.75635
GO:0051179	localization	AY609692.1	Sus scrofa clone Clu_26048.scr.msk.p1.Contig1, mRNA sequence		NM_024844.3	79902	NUP85	nucleoporin 85kDa	0.0191834	1	0.75635
GO:0051179	localization	AF120099.1	Sus scrofa chloride-bicarbonate anion exchanger AE2 (AE2) mRNA, partial cds	SLC4A2	AK295767.1	6522	SLC4A2	solute carrier family 4, anion exchanger, member 2 (erythrocyte membrane protein band 3-like 1)	0.0191834	1	0.75635
GO:0051179	localization	CF787137	855007 MARC 4PIG Sus scrofa cDNA 5', mRNA sequence						0.0191834	1	0.75635
GO:0051179	localization	BX674049	BX674049 Sus Scrofa library (scac) Sus scrofa cDNA clone scac0038.d.17 5prim, mRNA sequence						0.0191834	1	0.75635
GO:0051179	localization	BP144557	BP144557 full-length enriched swine cDNA library, adult ovary Sus scrofa cDNA clone OVR010019H05 5', mRNA sequence						0.0191834	1	0.75635
GO:0051179	localization	CK453173	908865 MARC 4PIG Sus scrofa cDNA 5', mRNA sequence						0.0191834	1	0.75635
GO:0051179	localization	BX915138	BX915138 Sus Scrofa library (scan) Sus scrofa cDNA clone scan0028.b.09 5prim, mRNA sequence						0.0191834	1	0.75635
GO:0051179	localization	BX918946	BX918946 Sus Scrofa library (scan) Sus scrofa cDNA clone scan0010.k.23 5prim, mRNA sequence						0.0191834	1	0.75635
GO:0051179	localization	BX918999	BX918999 Sus Scrofa library (scan) Sus scrofa cDNA clone scan0004.p.09 5prim, mRNA sequence						0.0191834	1	0.75635
GO:0051179	localization	BX919363	BX919363 Sus Scrofa library (scan) Sus scrofa cDNA clone scan0002.j.24 5prim, mRNA sequence						0.0191834	1	0.75635
GO:0051179	localization	BX920228	BX920228 Sus Scrofa library (scan) Sus scrofa cDNA clone scan0002.m.24 5prim, mRNA sequence						0.0191834	1	0.75635
GO:0051179	localization	BX925865	BX925865 Sus Scrofa library (scan) Sus scrofa cDNA clone scan0018.p.03 5prim, mRNA sequence						0.0191834	1	0.75635
GO:0051179	localization	CN157619	946337 MARC 4PIG Sus scrofa cDNA 5', mRNA sequence						0.0191834	1	0.75635
GO:0051179	localization	CN161855	951185 MARC 4PIG Sus scrofa cDNA 5', mRNA sequence						0.0191834	1	0.75635
GO:0051179	localization	CN161880	951212 MARC 4PIG Sus scrofa cDNA 5', mRNA sequence						0.0191834	1	0.75635
GO:0051179	localization	CN162365	951745 MARC 4PIG Sus scrofa cDNA 5', mRNA sequence						0.0191834	1	0.75635
GO:0051179	localization	DN101612	1096447 MARC 4PIG Sus scrofa cDNA 5', mRNA sequence						0.0191834	1	0.75635
GO:0051179	localization	DN107015	1104431 MARC 4PIG Sus scrofa cDNA 5', mRNA sequence						0.0191834	1	0.75635
GO:0051179	localization	DN109161	1106726 MARC 4PIG Sus scrofa cDNA 5', mRNA sequence						0.0191834	1	0.75635
GO:0051179	localization	DN109213	1106782 MARC 4PIG Sus scrofa cDNA 5', mRNA sequence						0.0191834	1	0.75635
GO:0051179	localization	DN112862	1112089 MARC 4PIG Sus scrofa cDNA 3', mRNA sequence						0.0191834	1	0.75635
GO:0051179	localization	DN132989	996429 MARC 4PIG Sus scrofa cDNA 5', mRNA sequence						0.0191834	1	0.75635
GO:0051179	localization	DN134303	999500 MARC 4PIG Sus scrofa cDNA 5', mRNA sequence						0.0191834	1	0.75635
GO:0051179	localization	CR940070	CR940070 Sus scrofa cDNA library (scaj) Sus scrofa cDNA clone scaj0018.n.14 5prim, mRNA sequence						0.0191834	1	0.75635
GO:0051179	localization	BW958109	BW958109 full-length enriched swine cDNA library, adult alveolar macrophage Sus scrofa cDNA clone AMP010044E04 5', mRNA sequence						0.0191834	1	0.75635
GO:0051179	localization	BW973179	BW973179 full-length enriched swine cDNA library, adult periphral blood mononuclear cell Sus scrofa cDNA clone PBL010079D03 5', mRNA sequence						0.0191834	1	0.75635
GO:0051179	localization	AJ946210	AJ946210 CSEQRAN17 Sus scrofa cDNA clone C0007320a05 5', mRNA sequence						0.0191834	1	0.75635
GO:0051179	localization	CV873038	PDUts1109G12 Porcine testis cDNA library I Sus scrofa cDNA clone PDUts1109G12 5', mRNA sequence						0.0191834	1	0.75635
GO:0051179	localization	DY425348	1544279 MARC 3PIG Sus scrofa cDNA 5', mRNA sequence						0.0191834	1	0.75635
GO:0051179	localization	DY426090	1545119 MARC 3PIG Sus scrofa cDNA 5', mRNA sequence						0.0191834	1	0.75635
GO:0051179	localization	DB803676	DB803676 full-length enriched swine cDNA library, adult skin Sus scrofa cDNA clone SKNB10061E02 5', mRNA sequence						0.0191834	1	0.75635
GO:0051179	localization	AK234877	Sus scrofa mRNA, clone:OVRM10025H02, expressed in ovary	LOC100154310	NM_005984.2	6576	SLC25A1	solute carrier family 25 (mitochondrial carrier; citrate transporter), member 1	0.0191834	1	0.75635
GO:0051179	localization	DT322069	SusFleck_BFN_0009_0012_5_pCNS_M07 SusFleck Backfat Normalized Sus scrofa cDNA clone 0009_0012_M07 5', mRNA sequence						0.0191834	1	0.75635
GO:0051179	localization	EW086062	recc2803c_i15.y1 ecc Sus scrofa cDNA 5', mRNA sequence						0.0191834	1	0.75635
GO:0051179	localization	EW101413	reep26c_l9.y1 eep Sus scrofa cDNA 5', mRNA sequence						0.0191834	1	0.75635
GO:0051179	localization	EW422118	rnca31b_h5.y1 nca Sus scrofa cDNA 5', mRNA sequence						0.0191834	1	0.75635
GO:0051179	localization	BI186233	UNL-P-FN-ce-f-01-0-UNL.s2 UNL-P-FN Sus scrofa cDNA clone UNL-P-FN-ce-f-01-0-UNL 3', mRNA sequence						0.0191834	1	0.75635
GO:0051179	localization	BI181114	UNL-P-FN-ab-h-05-0-UNL.s1 UNL-P-FN Sus scrofa cDNA clone UNL-P-FN-ab-h-05-0-UNL 3', mRNA sequence						0.0191834	1	0.75635
GO:0006793	phosphorus metabolic process	AK240553.1	Sus scrofa mRNA, clone:UTR010098A04, expressed in uterus		BC001766.1	6285	S100B	S100 calcium binding protein B	0.0193888	1	0.505675
GO:0006796	phosphate metabolic process	AK240553.1	Sus scrofa mRNA, clone:UTR010098A04, expressed in uterus		BC001766.1	6285	S100B	S100 calcium binding protein B	0.0193888	1	0.505675
GO:0006793	phosphorus metabolic process	AK238616.1	Sus scrofa mRNA, clone:THY010007C03, expressed in thymus		NM_001619.3	156	ADRBK1	adrenergic, beta, receptor kinase 1	0.0193888	1	0.505675
GO:0006796	phosphate metabolic process	AK238616.1	Sus scrofa mRNA, clone:THY010007C03, expressed in thymus		NM_001619.3	156	ADRBK1	adrenergic, beta, receptor kinase 1	0.0193888	1	0.505675
GO:0006793	phosphorus metabolic process	AK240222.1	Sus scrofa mRNA, clone:UTR010042B08, expressed in uterus		AK301557.1	5747	PTK2	PTK2 protein tyrosine kinase 2	0.0193888	1	0.505675
GO:0006796	phosphate metabolic process	AK240222.1	Sus scrofa mRNA, clone:UTR010042B08, expressed in uterus		AK301557.1	5747	PTK2	PTK2 protein tyrosine kinase 2	0.0193888	1	0.505675
GO:0006793	phosphorus metabolic process	CF366893	841599 MARC 3PIG Sus scrofa cDNA 5', mRNA sequence						0.0193888	1	0.505675
GO:0006796	phosphate metabolic process	CF366893	841599 MARC 3PIG Sus scrofa cDNA 5', mRNA sequence						0.0193888	1	0.505675
GO:0006793	phosphorus metabolic process	CK467671	938993 MARC 4PIG Sus scrofa cDNA 5', mRNA sequence						0.0193888	1	0.505675
GO:0006796	phosphate metabolic process	CK467671	938993 MARC 4PIG Sus scrofa cDNA 5', mRNA sequence						0.0193888	1	0.505675
GO:0006793	phosphorus metabolic process	DN109213	1106782 MARC 4PIG Sus scrofa cDNA 5', mRNA sequence						0.0193888	1	0.505675
GO:0006796	phosphate metabolic process	DN109213	1106782 MARC 4PIG Sus scrofa cDNA 5', mRNA sequence						0.0193888	1	0.505675
GO:0006793	phosphorus metabolic process	DN111663	1110804 MARC 4PIG Sus scrofa cDNA 5', mRNA sequence						0.0193888	1	0.505675
GO:0006796	phosphate metabolic process	DN111663	1110804 MARC 4PIG Sus scrofa cDNA 5', mRNA sequence						0.0193888	1	0.505675
GO:0006796	phosphate metabolic process	DN124163	1124985 MARC 4PIG Sus scrofa cDNA 5', mRNA sequence						0.0193888	1	0.505675
GO:0006793	phosphorus metabolic process	DN124163	1124985 MARC 4PIG Sus scrofa cDNA 5', mRNA sequence						0.0193888	1	0.505675
GO:0006793	phosphorus metabolic process	DN132989	996429 MARC 4PIG Sus scrofa cDNA 5', mRNA sequence						0.0193888	1	0.505675
GO:0006796	phosphate metabolic process	DN132989	996429 MARC 4PIG Sus scrofa cDNA 5', mRNA sequence						0.0193888	1	0.505675
GO:0006793	phosphorus metabolic process	AJ964761	AJ964761 KN404_2 Sus scrofa cDNA clone C0007757i12 5', mRNA sequence						0.0193888	1	0.505675
GO:0006796	phosphate metabolic process	AJ964761	AJ964761 KN404_2 Sus scrofa cDNA clone C0007757i12 5', mRNA sequence						0.0193888	1	0.505675
[truncated: 5,214 more rows]

## Sheet: LR3 vs LR2-up regulation
go_id	go_name	pig_Genebank	pig_Description	pig_Gene symbol	human_Genebank	human_Gene ID	human_Gene	human_Gene des	pvalue	FDR	enrichment
[truncated: 324 more rows]

[truncated: 39 more sheets: LR3 vs LR2-down regulation, LR4 vs LR3-up regulation, LR4 vs LR3-down regulation, LR5 vs LR4-up regulation, LR5 vs LR4-down regulation, LR6 vs LR5-up regulation, LR6 vs LR5-down regulation, LR7 vs LR6-up regulation, LR7 vs LR6-down regulation, LR8 vs LR7-up regulation, LR8 vs LR7-down regulation, LR9 vs LR8-up regulation, LR9 vs LR8-down regulation, LR10 vs LR9-up regulation, LR10 vs LR9-down regulation, LT2 vs LT1-up regulation, LT2 vs LT1-down regulation, LT3 vs LT2-up regulation, LT3 vs LT2-down regulation, LT4 vs LT3-up regulation …]
