# Supplementary material for: Comparative Analyses by Sequencing of Transcriptomes during Skeletal Muscle Development between Pig Breeds Differing in Muscle Growth Rate and Fatness
Source: PLoS One. 2011 May 26;6(5):e19774. doi: 10.1371/journal.pone.0019774 (PMC3102668; doi:10.1371/journal.pone.0019774)
Supplement: Table S9 — Signaling pathways of DE genes. (XLS) [file pone.0019774.s021.xls]

## Sheet: LR2 vs LR1-up regulation
path_id	path_name	pig_gene_name	pig_Description	human_Genebank	human_Gene ID	human_Gene	human_Gene des	pvalue	FDR	enrichment
1100	Metabolic pathways	ENO3	Sus scrofa enolase 3 (beta, muscle) (ENO3), mRNA	NM_053013.2	2027	ENO3	enolase 3 (beta, muscle)	6.51654e-14	3.06872e-13	7.28219
1100	Metabolic pathways	CKMT2	Sus scrofa creatine kinase, mitochondrial 2 (sarcomeric) (CKMT2), nuclear gene encoding mitochondrial protein, mRNA	NM_001099736.1	1160	CKMT2	creatine kinase, mitochondrial 2 (sarcomeric)	6.51654e-14	3.06872e-13	7.28219
1100	Metabolic pathways	LOC733678	Sus scrofa ATP synthase H+-transporting mitochondrial F1 complex O subunit (LOC733678), nuclear gene encoding mitochondrial protein, mRNA	NM_001697.2	539	ATP5O	ATP synthase, H+ transporting, mitochondrial F1 complex, O subunit	6.51654e-14	3.06872e-13	7.28219
1100	Metabolic pathways	PLCD4	Sus scrofa mRNA, clone:OVRM10050F12, expressed in ovary	AK299458.1	84812	PLCD4	phospholipase C, delta 4	6.51654e-14	3.06872e-13	7.28219
1100	Metabolic pathways	NME2	Sus scrofa mRNA for c-myc transcription factor, complete cds	BC107894.1	654364	NME1-NME2	NME1-NME2 readthrough	6.51654e-14	3.06872e-13	7.28219
1100	Metabolic pathways	ADSSL1	Sus scrofa adenylosuccinate synthase like 1 (ADSSL1), mRNA	BC047904.1	122622	ADSSL1	adenylosuccinate synthase like 1	6.51654e-14	3.06872e-13	7.28219
1100	Metabolic pathways	COX7C	Sus scrofa cytochrome c oxidase subunit VIIc (COX7C), nuclear gene encoding mitochondrial protein, mRNA	NM_001867.2	1350	COX7C	cytochrome c oxidase subunit VIIc	6.51654e-14	3.06872e-13	7.28219
1100	Metabolic pathways	NUDFV2	Sus scrofa NDUFV2 (NUDFV2), mRNA	AK291865.1	4729	NDUFV2	NADH dehydrogenase (ubiquinone) flavoprotein 2, 24kDa	6.51654e-14	3.06872e-13	7.28219
1100	Metabolic pathways	AMPD1	Sus scrofa adenosine monophosphate deaminase 1 (AMPD1), mRNA	BC141600.1	270	AMPD1	adenosine monophosphate deaminase 1	6.51654e-14	3.06872e-13	7.28219
1100	Metabolic pathways	CKM	Sus scrofa creatine kinase, muscle (CKM), mRNA	AK129878.1	1158	CKM	creatine kinase, muscle	6.51654e-14	3.06872e-13	7.28219
1100	Metabolic pathways	PTGS1	PREDICTED: Sus scrofa prostaglandin-endoperoxide synthase 1 (PTGS1), mRNA	NM_000962.2	5742	PTGS1	prostaglandin-endoperoxide synthase 1 (prostaglandin G/H synthase and cyclooxygenase)	6.51654e-14	3.06872e-13	7.28219
1100	Metabolic pathways	LOC100154379	PREDICTED: Sus scrofa similar to vacuolar H(+)-ATPase subunit; V-ATPase subunit; M16 (LOC100154379), mRNA	NM_004888.3	9550	ATP6V1G1	ATPase, H+ transporting, lysosomal 13kDa, V1 subunit G1	6.51654e-14	3.06872e-13	7.28219
1100	Metabolic pathways	ATP5A1	PREDICTED: Sus scrofa similar to ATP synthase, H+ transporting, mitochondrial F1 complex, alpha subunit 1, cardiac muscle (LOC100157880), mRNA	AK289457.1	498	ATP5A1	ATP synthase, H+ transporting, mitochondrial F1 complex, alpha subunit 1, cardiac muscle	6.51654e-14	3.06872e-13	7.28219
1100	Metabolic pathways	LOC100157156	PREDICTED: Sus scrofa similar to ATP synthase subunit beta, mitochondrial (LOC100157156), mRNA	CR600201.1	506	ATP5B	ATP synthase, H+ transporting, mitochondrial F1 complex, beta polypeptide	6.51654e-14	3.06872e-13	7.28219
1100	Metabolic pathways	LOC100153350	PREDICTED: Sus scrofa similar to DNA-directed RNA polymerases I and III subunit RPAC2 (RNA polymerases I and III subunit AC2) (DNA-directed RNA polymerase I subunit D) (DNA-directed RNA polymerase I 16 kDa polypeptide) (RPA16) (RPC16) (hRPA19) (AC19) (LOC	NM_015972.2	51082	POLR1D	polymerase (RNA) I polypeptide D, 16kDa	6.51654e-14	3.06872e-13	7.28219
1100	Metabolic pathways	LOC100156799	PREDICTED: Sus scrofa similar to Cytochrome c oxidase copper chaperone (Dopuin) (LOC100156799), mRNA	BC108317.1	10063	COX17	COX17 cytochrome c oxidase assembly homolog (S. cerevisiae)	6.51654e-14	3.06872e-13	7.28219
1100	Metabolic pathways	PGAM2	Sus scrofa phosphoglycerate mutase 2 (PGAM2), mRNA	NM_000290.3	5224	PGAM2	phosphoglycerate mutase 2 (muscle)	6.51654e-14	3.06872e-13	7.28219
1100	Metabolic pathways	ACADL	Sus scrofa acyl-Coenzyme A dehydrogenase, long chain (ACADL), nuclear gene encoding mitochondrial protein, mRNA	NM_001608.3	33	ACADL	acyl-Coenzyme A dehydrogenase, long chain	6.51654e-14	3.06872e-13	7.28219
1100	Metabolic pathways	ACADM	Sus scrofa acyl-Coenzyme A dehydrogenase, C-4 to C-12 straight chain (ACADM), nuclear gene encoding mitochondrial protein, mRNA	NM_000016.4	34	ACADM	acyl-Coenzyme A dehydrogenase, C-4 to C-12 straight chain	6.51654e-14	3.06872e-13	7.28219
1100	Metabolic pathways	PLCD4	Sus scrofa phospholipase C, delta 4 (PLCD4), mRNA	EU176403.1	84812	PLCD4	phospholipase C, delta 4	6.51654e-14	3.06872e-13	7.28219
1100	Metabolic pathways	OST48	Sus scrofa oligosaccharyltransferase OST48 (OST48), mRNA	NM_005216.4	1650	DDOST	dolichyl-diphosphooligosaccharide-protein glycosyltransferase	6.51654e-14	3.06872e-13	7.28219
1100	Metabolic pathways	ALR2	Sus scrofa aldose reductase (ALR2), mRNA	AK313439.1	231	AKR1B1	aldo-keto reductase family 1, member B1 (aldose reductase)	6.51654e-14	3.06872e-13	7.28219
1100	Metabolic pathways	PLA2G7	Sus scrofa clone Clu_71225.scr.msk.p1.Contig1, mRNA sequence	NM_005084.3	7941	PLA2G7	phospholipase A2, group VII (platelet-activating factor acetylhydrolase, plasma)	6.51654e-14	3.06872e-13	7.28219
1100	Metabolic pathways	ATIC	Sus scrofa mRNA, clone:OVRM10209D07, expressed in ovary	NM_004044.6	471	ATIC	5-aminoimidazole-4-carboxamide ribonucleotide formyltransferase/IMP cyclohydrolase	6.51654e-14	3.06872e-13	7.28219
1100	Metabolic pathways	OTC	PREDICTED: Sus scrofa ornithine carbamoyltransferase (OTC), mRNA					6.51654e-14	3.06872e-13	7.28219
1100	Metabolic pathways	COX7C	1139821 MARC 4PIG Sus scrofa cDNA 3', mRNA sequence					6.51654e-14	3.06872e-13	7.28219
1100	Metabolic pathways	LOC733678	EST0132-1 Swine Lambda TriplEx2 Library Sus scrofa cDNA clone 5-6 3' similar to ATP synthase,mitochondrial F1 complex,O subunit (ATP5O), mRNA sequence					6.51654e-14	3.06872e-13	7.28219
190	Oxidative phosphorylation	LOC733678	Sus scrofa ATP synthase H+-transporting mitochondrial F1 complex O subunit (LOC733678), nuclear gene encoding mitochondrial protein, mRNA	NM_001697.2	539	ATP5O	ATP synthase, H+ transporting, mitochondrial F1 complex, O subunit	6.48559e-07	1.52707e-06	15.5385
190	Oxidative phosphorylation	COX7C	Sus scrofa cytochrome c oxidase subunit VIIc (COX7C), nuclear gene encoding mitochondrial protein, mRNA	NM_001867.2	1350	COX7C	cytochrome c oxidase subunit VIIc	6.48559e-07	1.52707e-06	15.5385
190	Oxidative phosphorylation	NUDFV2	Sus scrofa NDUFV2 (NUDFV2), mRNA	AK291865.1	4729	NDUFV2	NADH dehydrogenase (ubiquinone) flavoprotein 2, 24kDa	6.48559e-07	1.52707e-06	15.5385
190	Oxidative phosphorylation	LOC100154379	PREDICTED: Sus scrofa similar to vacuolar H(+)-ATPase subunit; V-ATPase subunit; M16 (LOC100154379), mRNA	NM_004888.3	9550	ATP6V1G1	ATPase, H+ transporting, lysosomal 13kDa, V1 subunit G1	6.48559e-07	1.52707e-06	15.5385
190	Oxidative phosphorylation	ATP5A1	PREDICTED: Sus scrofa similar to ATP synthase, H+ transporting, mitochondrial F1 complex, alpha subunit 1, cardiac muscle (LOC100157880), mRNA	AK289457.1	498	ATP5A1	ATP synthase, H+ transporting, mitochondrial F1 complex, alpha subunit 1, cardiac muscle	6.48559e-07	1.52707e-06	15.5385
190	Oxidative phosphorylation	LOC100157156	PREDICTED: Sus scrofa similar to ATP synthase subunit beta, mitochondrial (LOC100157156), mRNA	CR600201.1	506	ATP5B	ATP synthase, H+ transporting, mitochondrial F1 complex, beta polypeptide	6.48559e-07	1.52707e-06	15.5385
190	Oxidative phosphorylation	LOC100156799	PREDICTED: Sus scrofa similar to Cytochrome c oxidase copper chaperone (Dopuin) (LOC100156799), mRNA	BC108317.1	10063	COX17	COX17 cytochrome c oxidase assembly homolog (S. cerevisiae)	6.48559e-07	1.52707e-06	15.5385
190	Oxidative phosphorylation	COX7C	1139821 MARC 4PIG Sus scrofa cDNA 3', mRNA sequence					6.48559e-07	1.52707e-06	15.5385
190	Oxidative phosphorylation	LOC733678	EST0132-1 Swine Lambda TriplEx2 Library Sus scrofa cDNA clone 5-6 3' similar to ATP synthase,mitochondrial F1 complex,O subunit (ATP5O), mRNA sequence					6.48559e-07	1.52707e-06	15.5385
230	Purine metabolism	NME2	Sus scrofa mRNA for c-myc transcription factor, complete cds	BC107894.1	654364	NME1-NME2	NME1-NME2 readthrough	4.72526e-06	7.41726e-06	15.4932
230	Purine metabolism	ADSSL1	Sus scrofa adenylosuccinate synthase like 1 (ADSSL1), mRNA	BC047904.1	122622	ADSSL1	adenylosuccinate synthase like 1	4.72526e-06	7.41726e-06	15.4932
230	Purine metabolism	AMPD1	Sus scrofa adenosine monophosphate deaminase 1 (AMPD1), mRNA	BC141600.1	270	AMPD1	adenosine monophosphate deaminase 1	4.72526e-06	7.41726e-06	15.4932
230	Purine metabolism	LOC100153350	PREDICTED: Sus scrofa similar to DNA-directed RNA polymerases I and III subunit RPAC2 (RNA polymerases I and III subunit AC2) (DNA-directed RNA polymerase I subunit D) (DNA-directed RNA polymerase I 16 kDa polypeptide) (RPA16) (RPC16) (hRPA19) (AC19) (LOC	NM_015972.2	51082	POLR1D	polymerase (RNA) I polypeptide D, 16kDa	4.72526e-06	7.41726e-06	15.4932
230	Purine metabolism	NUDT2	Sus scrofa nudix (nucleoside diphosphate linked moiety X)-type motif 2 (NUDT2), mRNA	NM_001161.3	318	NUDT2	nudix (nucleoside diphosphate linked moiety X)-type motif 2	4.72526e-06	7.41726e-06	15.4932
230	Purine metabolism	ATIC	Sus scrofa mRNA, clone:OVRM10209D07, expressed in ovary	NM_004044.6	471	ATIC	5-aminoimidazole-4-carboxamide ribonucleotide formyltransferase/IMP cyclohydrolase	4.72526e-06	7.41726e-06	15.4932
5012	Parkinson's disease	LOC733678	Sus scrofa ATP synthase H+-transporting mitochondrial F1 complex O subunit (LOC733678), nuclear gene encoding mitochondrial protein, mRNA	NM_001697.2	539	ATP5O	ATP synthase, H+ transporting, mitochondrial F1 complex, O subunit	1.90807e-05	2.24633e-05	12.2447
5012	Parkinson's disease	COX7C	Sus scrofa cytochrome c oxidase subunit VIIc (COX7C), nuclear gene encoding mitochondrial protein, mRNA	NM_001867.2	1350	COX7C	cytochrome c oxidase subunit VIIc	1.90807e-05	2.24633e-05	12.2447
5012	Parkinson's disease	NUDFV2	Sus scrofa NDUFV2 (NUDFV2), mRNA	AK291865.1	4729	NDUFV2	NADH dehydrogenase (ubiquinone) flavoprotein 2, 24kDa	1.90807e-05	2.24633e-05	12.2447
5012	Parkinson's disease	ATP5A1	PREDICTED: Sus scrofa similar to ATP synthase, H+ transporting, mitochondrial F1 complex, alpha subunit 1, cardiac muscle (LOC100157880), mRNA	AK289457.1	498	ATP5A1	ATP synthase, H+ transporting, mitochondrial F1 complex, alpha subunit 1, cardiac muscle	1.90807e-05	2.24633e-05	12.2447
5012	Parkinson's disease	LOC100157156	PREDICTED: Sus scrofa similar to ATP synthase subunit beta, mitochondrial (LOC100157156), mRNA	CR600201.1	506	ATP5B	ATP synthase, H+ transporting, mitochondrial F1 complex, beta polypeptide	1.90807e-05	2.24633e-05	12.2447
5012	Parkinson's disease	SLC25A6	Sus scrofa solute carrier family 25 (mitochondrial carrier; adenine nucleotide translocator), member 6 (SLC25A6), nuclear gene encoding mitochondrial protein, mRNA	NM_001636.3	293	SLC25A6	solute carrier family 25 (mitochondrial carrier; adenine nucleotide translocator), member 6	1.90807e-05	2.24633e-05	12.2447
5012	Parkinson's disease	COX7C	1139821 MARC 4PIG Sus scrofa cDNA 3', mRNA sequence					1.90807e-05	2.24633e-05	12.2447
5012	Parkinson's disease	LOC733678	EST0132-1 Swine Lambda TriplEx2 Library Sus scrofa cDNA clone 5-6 3' similar to ATP synthase,mitochondrial F1 complex,O subunit (ATP5O), mRNA sequence					1.90807e-05	2.24633e-05	12.2447
5016	Huntington's disease	LOC733678	Sus scrofa ATP synthase H+-transporting mitochondrial F1 complex O subunit (LOC733678), nuclear gene encoding mitochondrial protein, mRNA	NM_001697.2	539	ATP5O	ATP synthase, H+ transporting, mitochondrial F1 complex, O subunit	3.86254e-05	3.63783e-05	10.8453
5016	Huntington's disease	COX7C	Sus scrofa cytochrome c oxidase subunit VIIc (COX7C), nuclear gene encoding mitochondrial protein, mRNA	NM_001867.2	1350	COX7C	cytochrome c oxidase subunit VIIc	3.86254e-05	3.63783e-05	10.8453
5016	Huntington's disease	NUDFV2	Sus scrofa NDUFV2 (NUDFV2), mRNA	AK291865.1	4729	NDUFV2	NADH dehydrogenase (ubiquinone) flavoprotein 2, 24kDa	3.86254e-05	3.63783e-05	10.8453
5016	Huntington's disease	ATP5A1	PREDICTED: Sus scrofa similar to ATP synthase, H+ transporting, mitochondrial F1 complex, alpha subunit 1, cardiac muscle (LOC100157880), mRNA	AK289457.1	498	ATP5A1	ATP synthase, H+ transporting, mitochondrial F1 complex, alpha subunit 1, cardiac muscle	3.86254e-05	3.63783e-05	10.8453
5016	Huntington's disease	LOC100157156	PREDICTED: Sus scrofa similar to ATP synthase subunit beta, mitochondrial (LOC100157156), mRNA	CR600201.1	506	ATP5B	ATP synthase, H+ transporting, mitochondrial F1 complex, beta polypeptide	3.86254e-05	3.63783e-05	10.8453
5016	Huntington's disease	SLC25A6	Sus scrofa solute carrier family 25 (mitochondrial carrier; adenine nucleotide translocator), member 6 (SLC25A6), nuclear gene encoding mitochondrial protein, mRNA	NM_001636.3	293	SLC25A6	solute carrier family 25 (mitochondrial carrier; adenine nucleotide translocator), member 6	3.86254e-05	3.63783e-05	10.8453
5016	Huntington's disease	COX7C	1139821 MARC 4PIG Sus scrofa cDNA 3', mRNA sequence					3.86254e-05	3.63783e-05	10.8453
5016	Huntington's disease	LOC733678	EST0132-1 Swine Lambda TriplEx2 Library Sus scrofa cDNA clone 5-6 3' similar to ATP synthase,mitochondrial F1 complex,O subunit (ATP5O), mRNA sequence					3.86254e-05	3.63783e-05	10.8453
1065	Biosynthesis of alkaloids derived from histidine and purine	ENO3	Sus scrofa enolase 3 (beta, muscle) (ENO3), mRNA	NM_053013.2	2027	ENO3	enolase 3 (beta, muscle)	0.000258076	0.00018028	15.3367
1065	Biosynthesis of alkaloids derived from histidine and purine	ADSSL1	Sus scrofa adenylosuccinate synthase like 1 (ADSSL1), mRNA	BC047904.1	122622	ADSSL1	adenylosuccinate synthase like 1	0.000258076	0.00018028	15.3367
1065	Biosynthesis of alkaloids derived from histidine and purine	PGAM2	Sus scrofa phosphoglycerate mutase 2 (PGAM2), mRNA	NM_000290.3	5224	PGAM2	phosphoglycerate mutase 2 (muscle)	0.000258076	0.00018028	15.3367
1065	Biosynthesis of alkaloids derived from histidine and purine	ATIC	Sus scrofa mRNA, clone:OVRM10209D07, expressed in ovary	NM_004044.6	471	ATIC	5-aminoimidazole-4-carboxamide ribonucleotide formyltransferase/IMP cyclohydrolase	0.000258076	0.00018028	15.3367
4260	Cardiac muscle contraction	CACNG1	Sus scrofa calcium channel, voltage-dependent, gamma subunit 1 (CACNG1), mRNA	BC113492.1	786	CACNG1	calcium channel, voltage-dependent, gamma subunit 1	0.00029069	0.000195556	14.8857
4260	Cardiac muscle contraction	TPM3	Sus scrofa TPM3 (TPM3) mRNA, complete cds	BC008407.1	7170	TPM3	tropomyosin 3	0.00029069	0.000195556	14.8857
4260	Cardiac muscle contraction	COX7C	Sus scrofa cytochrome c oxidase subunit VIIc (COX7C), nuclear gene encoding mitochondrial protein, mRNA	NM_001867.2	1350	COX7C	cytochrome c oxidase subunit VIIc	0.00029069	0.000195556	14.8857
4260	Cardiac muscle contraction	TPM2	Sus scrofa tropomyosin 2 (beta) (TPM2), mRNA	NM_213674.1	7169	TPM2	tropomyosin 2 (beta)	0.00029069	0.000195556	14.8857
4260	Cardiac muscle contraction	COX7C	1139821 MARC 4PIG Sus scrofa cDNA 3', mRNA sequence					0.00029069	0.000195556	14.8857
1070	Biosynthesis of plant hormones	ENO3	Sus scrofa enolase 3 (beta, muscle) (ENO3), mRNA	NM_053013.2	2027	ENO3	enolase 3 (beta, muscle)	0.000499933	0.00029428	12.9772
1070	Biosynthesis of plant hormones	AMPD1	Sus scrofa adenosine monophosphate deaminase 1 (AMPD1), mRNA	BC141600.1	270	AMPD1	adenosine monophosphate deaminase 1	0.000499933	0.00029428	12.9772
1070	Biosynthesis of plant hormones	PGAM2	Sus scrofa phosphoglycerate mutase 2 (PGAM2), mRNA	NM_000290.3	5224	PGAM2	phosphoglycerate mutase 2 (muscle)	0.000499933	0.00029428	12.9772
1070	Biosynthesis of plant hormones	ATIC	Sus scrofa mRNA, clone:OVRM10209D07, expressed in ovary	NM_004044.6	471	ATIC	5-aminoimidazole-4-carboxamide ribonucleotide formyltransferase/IMP cyclohydrolase	0.000499933	0.00029428	12.9772
4510	Focal adhesion	CAV1	Sus scrofa caveolin 1 (CAV1), mRNA	NM_001753.3	857	CAV1	caveolin 1, caveolae protein, 22kDa	0.000727218	0.000377	8.21611
4510	Focal adhesion	CAV2	Sus scrofa caveolin 2 (CAV2), mRNA	BC005256.1	858	CAV2	caveolin 2	0.000727218	0.000377	8.21611
4510	Focal adhesion	LOC100157406	PREDICTED: Sus scrofa similar to Actinin, alpha 2 (LOC100157406), mRNA	NM_001103.2	88	ACTN2	actinin, alpha 2	0.000727218	0.000377	8.21611
4510	Focal adhesion	PIAP	Sus scrofa putative inhibitor of apoptosis (PIAP), mRNA	NM_182962.1	330	BIRC3	baculoviral IAP repeat-containing 3	0.000727218	0.000377	8.21611
4510	Focal adhesion	MYLPF	Sus scrofa fast skeletal myosin light chain 2 (MYLPF), mRNA	NM_013292.3	29895	MYLPF	myosin light chain, phosphorylatable, fast skeletal muscle	0.000727218	0.000377	8.21611
5010	Alzheimer's disease	LOC733678	Sus scrofa ATP synthase H+-transporting mitochondrial F1 complex O subunit (LOC733678), nuclear gene encoding mitochondrial protein, mRNA	NM_001697.2	539	ATP5O	ATP synthase, H+ transporting, mitochondrial F1 complex, O subunit	0.000919395	0.000432954	7.81038
5010	Alzheimer's disease	COX7C	Sus scrofa cytochrome c oxidase subunit VIIc (COX7C), nuclear gene encoding mitochondrial protein, mRNA	NM_001867.2	1350	COX7C	cytochrome c oxidase subunit VIIc	0.000919395	0.000432954	7.81038
5010	Alzheimer's disease	NUDFV2	Sus scrofa NDUFV2 (NUDFV2), mRNA	AK291865.1	4729	NDUFV2	NADH dehydrogenase (ubiquinone) flavoprotein 2, 24kDa	0.000919395	0.000432954	7.81038
5010	Alzheimer's disease	ATP5A1	PREDICTED: Sus scrofa similar to ATP synthase, H+ transporting, mitochondrial F1 complex, alpha subunit 1, cardiac muscle (LOC100157880), mRNA	AK289457.1	498	ATP5A1	ATP synthase, H+ transporting, mitochondrial F1 complex, alpha subunit 1, cardiac muscle	0.000919395	0.000432954	7.81038
5010	Alzheimer's disease	LOC100157156	PREDICTED: Sus scrofa similar to ATP synthase subunit beta, mitochondrial (LOC100157156), mRNA	CR600201.1	506	ATP5B	ATP synthase, H+ transporting, mitochondrial F1 complex, beta polypeptide	0.000919395	0.000432954	7.81038
5010	Alzheimer's disease	COX7C	1139821 MARC 4PIG Sus scrofa cDNA 3', mRNA sequence					0.000919395	0.000432954	7.81038
5010	Alzheimer's disease	LOC733678	EST0132-1 Swine Lambda TriplEx2 Library Sus scrofa cDNA clone 5-6 3' similar to ATP synthase,mitochondrial F1 complex,O subunit (ATP5O), mRNA sequence					0.000919395	0.000432954	7.81038
240	Pyrimidine metabolism	NME2	Sus scrofa mRNA for c-myc transcription factor, complete cds	BC107894.1	654364	NME1-NME2	NME1-NME2 readthrough	0.00220795	0.000891536	14.5994
240	Pyrimidine metabolism	LOC100153350	PREDICTED: Sus scrofa similar to DNA-directed RNA polymerases I and III subunit RPAC2 (RNA polymerases I and III subunit AC2) (DNA-directed RNA polymerase I subunit D) (DNA-directed RNA polymerase I 16 kDa polypeptide) (RPA16) (RPC16) (hRPA19) (AC19) (LOC	NM_015972.2	51082	POLR1D	polymerase (RNA) I polypeptide D, 16kDa	0.00220795	0.000891536	14.5994
240	Pyrimidine metabolism	NUDT2	Sus scrofa nudix (nucleoside diphosphate linked moiety X)-type motif 2 (NUDT2), mRNA	NM_001161.3	318	NUDT2	nudix (nucleoside diphosphate linked moiety X)-type motif 2	0.00220795	0.000891536	14.5994
330	Arginine and proline metabolism	CKMT2	Sus scrofa creatine kinase, mitochondrial 2 (sarcomeric) (CKMT2), nuclear gene encoding mitochondrial protein, mRNA	NM_001099736.1	1160	CKMT2	creatine kinase, mitochondrial 2 (sarcomeric)	0.00246958	0.00096913	14.0587
330	Arginine and proline metabolism	CKM	Sus scrofa creatine kinase, muscle (CKM), mRNA	AK129878.1	1158	CKM	creatine kinase, muscle	0.00246958	0.00096913	14.0587
330	Arginine and proline metabolism	OTC	PREDICTED: Sus scrofa ornithine carbamoyltransferase (OTC), mRNA					0.00246958	0.00096913	14.0587
4810	Regulation of actin cytoskeleton	ARPC1B	Sus scrofa mRNA, clone:LNG010007F06, expressed in lung	NM_005720.2	10095	ARPC1B	actin related protein 2/3 complex, subunit 1B, 41kDa	0.00592581	0.00192915	6.74816
4810	Regulation of actin cytoskeleton	LOC100157406	PREDICTED: Sus scrofa similar to Actinin, alpha 2 (LOC100157406), mRNA	NM_001103.2	88	ACTN2	actinin, alpha 2	0.00592581	0.00192915	6.74816
4810	Regulation of actin cytoskeleton	MYLPF	Sus scrofa fast skeletal myosin light chain 2 (MYLPF), mRNA	NM_013292.3	29895	MYLPF	myosin light chain, phosphorylatable, fast skeletal muscle	0.00592581	0.00192915	6.74816
4810	Regulation of actin cytoskeleton	ARPC5	BW973127 full-length enriched swine cDNA library, adult periphral blood mononuclear cell Sus scrofa cDNA clone PBL010078G08 5', mRNA sequence					0.00592581	0.00192915	6.74816
3010	Ribosome	RPSA	Sus scrofa ribosomal protein SA (RPSA), mRNA	BC005391.1	3921	RPSA	ribosomal protein SA	0.0061915	0.00198958	10.259
3010	Ribosome	RPS20	Sus scrofa ribosomal protein S20 (RPS20), mRNA	NM_001023.3	6224	RPS20	ribosomal protein S20	0.0061915	0.00198958	10.259
3010	Ribosome	HBP15/L22	Sus scrofa heparin binding protein (HBP15/L22), mRNA	AF136171.1	6146	RPL22	ribosomal protein L22	0.0061915	0.00198958	10.259
3010	Ribosome	RPS20	1103217 MARC 4PIG Sus scrofa cDNA 3', mRNA sequence					0.0061915	0.00198958	10.259
4530	Tight junction	LOC100157406	PREDICTED: Sus scrofa similar to Actinin, alpha 2 (LOC100157406), mRNA	NM_001103.2	88	ACTN2	actinin, alpha 2	0.00888774	0.00252469	9.03772
4530	Tight junction	MYLPF	Sus scrofa fast skeletal myosin light chain 2 (MYLPF), mRNA	NM_013292.3	29895	MYLPF	myosin light chain, phosphorylatable, fast skeletal muscle	0.00888774	0.00252469	9.03772
4530	Tight junction	MYH7	Sus scrofa myosin, heavy chain 7, cardiac muscle, beta (MYH7), mRNA	NM_000257.2	4625	MYH7	myosin, heavy chain 7, cardiac muscle, beta	0.00888774	0.00252469	9.03772
5200	Pathways in cancer	TGFB3	Sus scrofa mRNA, clone:OVRM10183D03, expressed in ovary	NM_003239.2	7043	TGFB3	transforming growth factor, beta 3	0.00970419	0.00266307	4.58435
5200	Pathways in cancer	TPM3	Sus scrofa TPM3 (TPM3) mRNA, complete cds	BC008407.1	7170	TPM3	tropomyosin 3	0.00970419	0.00266307	4.58435
5200	Pathways in cancer	HSPCB	PREDICTED: Sus scrofa heat shock 90kD protein 1, beta (HSPCB), mRNA	AK297367.1	3326	HSP90AB1	heat shock protein 90kDa alpha (cytosolic), class B member 1	0.00970419	0.00266307	4.58435
5200	Pathways in cancer	LOC100152215	PREDICTED: Sus scrofa similar to LOC513497 protein (LOC100152215), mRNA	AB451290.1	1026	CDKN1A	cyclin-dependent kinase inhibitor 1A (p21, Cip1)	0.00970419	0.00266307	4.58435
5200	Pathways in cancer	PIAP	Sus scrofa putative inhibitor of apoptosis (PIAP), mRNA	NM_182962.1	330	BIRC3	baculoviral IAP repeat-containing 3	0.00970419	0.00266307	4.58435
5200	Pathways in cancer	TGFB3	Sus scrofa transforming growth factor, beta 3 (TGFB3), mRNA	NM_003239.2	7043	TGFB3	transforming growth factor, beta 3	0.00970419	0.00266307	4.58435
4670	Leukocyte transendothelial migration	LOC100157406	PREDICTED: Sus scrofa similar to Actinin, alpha 2 (LOC100157406), mRNA	NM_001103.2	88	ACTN2	actinin, alpha 2	0.0114847	0.00293452	8.25183
4670	Leukocyte transendothelial migration	CDH5	Sus scrofa cadherin 5 (CDH5), mRNA	AK300461.1	1003	CDH5	cadherin 5, type 2 (vascular endothelium)	0.0114847	0.00293452	8.25183
4670	Leukocyte transendothelial migration	MYLPF	Sus scrofa fast skeletal myosin light chain 2 (MYLPF), mRNA	NM_013292.3	29895	MYLPF	myosin light chain, phosphorylatable, fast skeletal muscle	0.0114847	0.00293452	8.25183
3320	PPAR signaling pathway	FABP3	Sus scrofa partial mRNA for heart fatty acid-binding protein (FABP3 gene)	AK314122.1	2170	FABP3	fatty acid binding protein 3, muscle and heart (mammary-derived growth inhibitor)	0.0121973	0.00303296	8.07626
3320	PPAR signaling pathway	FABP3	Sus scrofa fatty acid binding protein 3, muscle and heart (mammary-derived growth inhibitor) (FABP3), mRNA	NM_004102.3	2170	FABP3	fatty acid binding protein 3, muscle and heart (mammary-derived growth inhibitor)	0.0121973	0.00303296	8.07626
3320	PPAR signaling pathway	ACADL	Sus scrofa acyl-Coenzyme A dehydrogenase, long chain (ACADL), nuclear gene encoding mitochondrial protein, mRNA	NM_001608.3	33	ACADL	acyl-Coenzyme A dehydrogenase, long chain	0.0121973	0.00303296	8.07626
3320	PPAR signaling pathway	ACADM	Sus scrofa acyl-Coenzyme A dehydrogenase, C-4 to C-12 straight chain (ACADM), nuclear gene encoding mitochondrial protein, mRNA	NM_000016.4	34	ACADM	acyl-Coenzyme A dehydrogenase, C-4 to C-12 straight chain	0.0121973	0.00303296	8.07626
4010	MAPK signaling pathway	CACNG1	Sus scrofa calcium channel, voltage-dependent, gamma subunit 1 (CACNG1), mRNA	BC113492.1	786	CACNG1	calcium channel, voltage-dependent, gamma subunit 1	0.0122841	0.00304459	5.50122
4010	MAPK signaling pathway	TGFB3	Sus scrofa mRNA, clone:OVRM10183D03, expressed in ovary	NM_003239.2	7043	TGFB3	transforming growth factor, beta 3	0.0122841	0.00304459	5.50122
4010	MAPK signaling pathway	MEF2C	Sus scrofa myocyte enhancer factor 2C protein (MEF2C) mRNA, complete cds	NM_001131005.1	4208	MEF2C	myocyte enhancer factor 2C	0.0122841	0.00304459	5.50122
4010	MAPK signaling pathway	TGFB3	Sus scrofa transforming growth factor, beta 3 (TGFB3), mRNA	NM_003239.2	7043	TGFB3	transforming growth factor, beta 3	0.0122841	0.00304459	5.50122
4010	MAPK signaling pathway	LOC494463	Sus scrofa stathmin-1 (LOC494463), mRNA	BC082228.1	3925	STMN1	stathmin 1	0.0122841	0.00304459	5.50122
71	Fatty acid metabolism	ACADL	Sus scrofa acyl-Coenzyme A dehydrogenase, long chain (ACADL), nuclear gene encoding mitochondrial protein, mRNA	NM_001608.3	33	ACADL	acyl-Coenzyme A dehydrogenase, long chain	0.0194469	0.0044718	13.3187
71	Fatty acid metabolism	ACADM	Sus scrofa acyl-Coenzyme A dehydrogenase, C-4 to C-12 straight chain (ACADM), nuclear gene encoding mitochondrial protein, mRNA	NM_000016.4	34	ACADM	acyl-Coenzyme A dehydrogenase, C-4 to C-12 straight chain	0.0194469	0.0044718	13.3187
3050	Proteasome	PSMB7	Sus scrofa proteasome (prosome, macropain) subunit, beta type, 7 (PSMB7), mRNA	AK223356.1	5695	PSMB7	proteasome (prosome, macropain) subunit, beta type, 7	0.0281842	0.00595624	11.0024
3050	Proteasome	LOC100153923	PREDICTED: Sus scrofa similar to Proteasome (prosome, macropain) subunit, beta type, 4 (LOC100153923), mRNA	BC008314.2	5692	PSMB4	proteasome (prosome, macropain) subunit, beta type, 4	0.0281842	0.00595624	11.0024
3050	Proteasome	LOC100153923	Sus scrofa mRNA, clone:THY010107F05, expressed in thymus	BC008314.2	5692	PSMB4	proteasome (prosome, macropain) subunit, beta type, 4	0.0281842	0.00595624	11.0024
10	Glycolysis / Gluconeogenesis	ENO3	Sus scrofa enolase 3 (beta, muscle) (ENO3), mRNA	NM_053013.2	2027	ENO3	enolase 3 (beta, muscle)	0.0305884	0.00632344	10.544
10	Glycolysis / Gluconeogenesis	PGAM2	Sus scrofa phosphoglycerate mutase 2 (PGAM2), mRNA	NM_000290.3	5224	PGAM2	phosphoglycerate mutase 2 (muscle)	0.0305884	0.00632344	10.544
1061	Biosynthesis of phenylpropanoids	ENO3	Sus scrofa enolase 3 (beta, muscle) (ENO3), mRNA	NM_053013.2	2027	ENO3	enolase 3 (beta, muscle)	0.0356498	0.00704651	9.73293
1061	Biosynthesis of phenylpropanoids	PGAM2	Sus scrofa phosphoglycerate mutase 2 (PGAM2), mRNA	NM_000290.3	5224	PGAM2	phosphoglycerate mutase 2 (muscle)	0.0356498	0.00704651	9.73293
4020	Calcium signaling pathway	PLCD4	Sus scrofa mRNA, clone:OVRM10050F12, expressed in ovary	AK299458.1	84812	PLCD4	phospholipase C, delta 4	0.0403177	0.00765929	5.19978
4020	Calcium signaling pathway	PLCD4	Sus scrofa phospholipase C, delta 4 (PLCD4), mRNA	EU176403.1	84812	PLCD4	phospholipase C, delta 4	0.0403177	0.00765929	5.19978
4020	Calcium signaling pathway	SLC25A6	Sus scrofa solute carrier family 25 (mitochondrial carrier; adenine nucleotide translocator), member 6 (SLC25A6), nuclear gene encoding mitochondrial protein, mRNA	NM_001636.3	293	SLC25A6	solute carrier family 25 (mitochondrial carrier; adenine nucleotide translocator), member 6	0.0403177	0.00765929	5.19978
4020	Calcium signaling pathway	RYR1	Sus scrofa ryanodine receptor 1 (RYR1), mRNA	NM_001042723.1	6261	RYR1	ryanodine receptor 1 (skeletal)	0.0403177	0.00765929	5.19978
1063	Biosynthesis of alkaloids derived from shikimate pathway	ENO3	Sus scrofa enolase 3 (beta, muscle) (ENO3), mRNA	NM_053013.2	2027	ENO3	enolase 3 (beta, muscle)	0.0438533	0.00809264	8.72608
1063	Biosynthesis of alkaloids derived from shikimate pathway	PGAM2	Sus scrofa phosphoglycerate mutase 2 (PGAM2), mRNA	NM_000290.3	5224	PGAM2	phosphoglycerate mutase 2 (muscle)	0.0438533	0.00809264	8.72608
1064	Biosynthesis of alkaloids derived from ornithine, lysine and nicotinic acid	ENO3	Sus scrofa enolase 3 (beta, muscle) (ENO3), mRNA	NM_053013.2	2027	ENO3	enolase 3 (beta, muscle)	0.046745	0.00842905	8.43521
1064	Biosynthesis of alkaloids derived from ornithine, lysine and nicotinic acid	PGAM2	Sus scrofa phosphoglycerate mutase 2 (PGAM2), mRNA	NM_000290.3	5224	PGAM2	phosphoglycerate mutase 2 (muscle)	0.046745	0.00842905	8.43521
1062	Biosynthesis of terpenoids and steroids	ENO3	Sus scrofa enolase 3 (beta, muscle) (ENO3), mRNA	NM_053013.2	2027	ENO3	enolase 3 (beta, muscle)	0.0527561	0.00908137	7.90801
1062	Biosynthesis of terpenoids and steroids	PGAM2	Sus scrofa phosphoglycerate mutase 2 (PGAM2), mRNA	NM_000290.3	5224	PGAM2	phosphoglycerate mutase 2 (muscle)	0.0527561	0.00908137	7.90801
1066	Biosynthesis of alkaloids derived from terpenoid and polyketide	ENO3	Sus scrofa enolase 3 (beta, muscle) (ENO3), mRNA	NM_053013.2	2027	ENO3	enolase 3 (beta, muscle)	0.0558726	0.00939681	7.66837
1066	Biosynthesis of alkaloids derived from terpenoid and polyketide	PGAM2	Sus scrofa phosphoglycerate mutase 2 (PGAM2), mRNA	NM_000290.3	5224	PGAM2	phosphoglycerate mutase 2 (muscle)	0.0558726	0.00939681	7.66837
40	Pentose and glucuronate interconversions	ALR2	Sus scrofa aldose reductase (ALR2), mRNA	AK313439.1	231	AKR1B1	aldo-keto reductase family 1, member B1 (aldose reductase)	0.0624856	0.0100247	31.632
5220	Chronic myeloid leukemia	TGFB3	Sus scrofa mRNA, clone:OVRM10183D03, expressed in ovary	NM_003239.2	7043	TGFB3	transforming growth factor, beta 3	0.0656505	0.0103052	7.02934
5220	Chronic myeloid leukemia	LOC100152215	PREDICTED: Sus scrofa similar to LOC513497 protein (LOC100152215), mRNA	AB451290.1	1026	CDKN1A	cyclin-dependent kinase inhibitor 1A (p21, Cip1)	0.0656505	0.0103052	7.02934
5220	Chronic myeloid leukemia	TGFB3	Sus scrofa transforming growth factor, beta 3 (TGFB3), mRNA	NM_003239.2	7043	TGFB3	transforming growth factor, beta 3	0.0656505	0.0103052	7.02934
4350	TGF-beta signaling pathway	TGFB3	Sus scrofa mRNA, clone:OVRM10183D03, expressed in ovary	NM_003239.2	7043	TGFB3	transforming growth factor, beta 3	0.0832967	0.0119707	6.1721
4350	TGF-beta signaling pathway	TGFB3	Sus scrofa transforming growth factor, beta 3 (TGFB3), mRNA	NM_003239.2	7043	TGFB3	transforming growth factor, beta 3	0.0832967	0.0119707	6.1721
4350	TGF-beta signaling pathway	DCN	Sus scrofa decorin (DCN), mRNA	NM_001920.3	1634	DCN	decorin	0.0832967	0.0119707	6.1721
3420	Nucleotide excision repair	LOC100153668	PREDICTED: Sus scrofa similar to RAD23 homolog B (S. cerevisiae) (LOC100153668), mRNA	AK125226.1	5887	RAD23B	RAD23 homolog B (S. cerevisiae)	0.0929964	0.0127717	21.088
670	One carbon pool by folate	ATIC	Sus scrofa mRNA, clone:OVRM10209D07, expressed in ovary	NM_004044.6	471	ATIC	5-aminoimidazole-4-carboxamide ribonucleotide formyltransferase/IMP cyclohydrolase	0.0929964	0.0127717	21.088
4110	Cell cycle	TGFB3	Sus scrofa mRNA, clone:OVRM10183D03, expressed in ovary	NM_003239.2	7043	TGFB3	transforming growth factor, beta 3	0.10651	0.0137759	5.38417
4110	Cell cycle	LOC100152215	PREDICTED: Sus scrofa similar to LOC513497 protein (LOC100152215), mRNA	AB451290.1	1026	CDKN1A	cyclin-dependent kinase inhibitor 1A (p21, Cip1)	0.10651	0.0137759	5.38417
4110	Cell cycle	TGFB3	Sus scrofa transforming growth factor, beta 3 (TGFB3), mRNA	NM_003239.2	7043	TGFB3	transforming growth factor, beta 3	0.10651	0.0137759	5.38417
532	Chondroitin sulfate biosynthesis	LOC100157245	PREDICTED: Sus scrofa similar to dermatan 4 sulfotransferase 1 (LOC100157245), mRNA	BC053633.1	113189	CHST14	carbohydrate (N-acetylgalactosamine 4-0) sulfotransferase 14	0.108072	0.0138846	18.0754
5215	Prostate cancer	HSPCB	PREDICTED: Sus scrofa heat shock 90kD protein 1, beta (HSPCB), mRNA	AK297367.1	3326	HSP90AB1	heat shock protein 90kDa alpha (cytosolic), class B member 1	0.110578	0.0140558	5.272
5215	Prostate cancer	LOC100152215	PREDICTED: Sus scrofa similar to LOC513497 protein (LOC100152215), mRNA	AB451290.1	1026	CDKN1A	cyclin-dependent kinase inhibitor 1A (p21, Cip1)	0.110578	0.0140558	5.272
4612	Antigen processing and presentation	HSPCB	PREDICTED: Sus scrofa heat shock 90kD protein 1, beta (HSPCB), mRNA	AK297367.1	3326	HSP90AB1	heat shock protein 90kDa alpha (cytosolic), class B member 1	0.1147	0.0143297	5.16441
4612	Antigen processing and presentation	CTSB	Sus scrofa mRNA, clone:LVR010036C01, expressed in liver	AK075393.1	1508	CTSB	cathepsin B	0.1147	0.0143297	5.16441
3020	RNA polymerase	LOC100153350	PREDICTED: Sus scrofa similar to DNA-directed RNA polymerases I and III subunit RPAC2 (RNA polymerases I and III subunit AC2) (DNA-directed RNA polymerase I subunit D) (DNA-directed RNA polymerase I 16 kDa polypeptide) (RPA16) (RPC16) (hRPA19) (AC19) (LOC	NM_015972.2	51082	POLR1D	polymerase (RNA) I polypeptide D, 16kDa	0.12303	0.0148554	15.816
52	Galactose metabolism	ALR2	Sus scrofa aldose reductase (ALR2), mRNA	AK313439.1	231	AKR1B1	aldo-keto reductase family 1, member B1 (aldose reductase)	0.12303	0.0148554	15.816
410	beta-Alanine metabolism	ACADM	Sus scrofa acyl-Coenzyme A dehydrogenase, C-4 to C-12 straight chain (ACADM), nuclear gene encoding mitochondrial protein, mRNA	NM_000016.4	34	ACADM	acyl-Coenzyme A dehydrogenase, C-4 to C-12 straight chain	0.152592	0.0173588	12.6528
51	Fructose and mannose metabolism	ALR2	Sus scrofa aldose reductase (ALR2), mRNA	AK313439.1	231	AKR1B1	aldo-keto reductase family 1, member B1 (aldose reductase)	0.19607	0.0205555	9.73293
250	Alanine, aspartate and glutamate metabolism	ADSSL1	Sus scrofa adenylosuccinate synthase like 1 (ADSSL1), mRNA	BC047904.1	122622	ADSSL1	adenylosuccinate synthase like 1	0.210336	0.0214978	9.03772
910	Nitrogen metabolism	CA3	Sus scrofa carbonic anhydrase III, muscle specific (CA3), mRNA	NM_005181.3	761	CA3	carbonic anhydrase III, muscle specific	0.210336	0.0214978	9.03772
4150	mTOR signaling pathway	EIF4E2	Sus scrofa mRNA, clone:OVR010011G07, expressed in ovary	AB209519.1	9470	EIF4E2	eukaryotic translation initiation factor 4E family member 2	0.224489	0.0223872	8.43521
4150	mTOR signaling pathway	EIF4E2	Sus scrofa eukaryotic translation initiation factor 4E family member 2 (EIF4E2), mRNA	BC021690.1	9470	EIF4E2	eukaryotic translation initiation factor 4E family member 2	0.224489	0.0223872	8.43521
565	Ether lipid metabolism	PLA2G7	Sus scrofa clone Clu_71225.scr.msk.p1.Contig1, mRNA sequence	NM_005084.3	7941	PLA2G7	phospholipase A2, group VII (platelet-activating factor acetylhydrolase, plasma)	0.224489	0.0223872	8.43521
5216	Thyroid cancer	TPM3	Sus scrofa TPM3 (TPM3) mRNA, complete cds	BC008407.1	7170	TPM3	tropomyosin 3	0.252462	0.0240237	7.44283
640	Propanoate metabolism	ACADM	Sus scrofa acyl-Coenzyme A dehydrogenase, C-4 to C-12 straight chain (ACADM), nuclear gene encoding mitochondrial protein, mRNA	NM_000016.4	34	ACADM	acyl-Coenzyme A dehydrogenase, C-4 to C-12 straight chain	0.252462	0.0240237	7.44283
5322	Systemic lupus erythematosus	H2AFZ	Sus scrofa H2A histone family, member Z (H2AFZ), mRNA	NM_002106.3	3015	H2AFZ	H2A histone family, member Z	0.263837	0.024647	3.1632
5322	Systemic lupus erythematosus	LOC100157406	PREDICTED: Sus scrofa similar to Actinin, alpha 2 (LOC100157406), mRNA	NM_001103.2	88	ACTN2	actinin, alpha 2	0.263837	0.024647	3.1632
510	N-Glycan biosynthesis	OST48	Sus scrofa oligosaccharyltransferase OST48 (OST48), mRNA	NM_005216.4	1650	DDOST	dolichyl-diphosphooligosaccharide-protein glycosyltransferase	0.266284	0.0247782	7.02934
561	Glycerolipid metabolism	ALR2	Sus scrofa aldose reductase (ALR2), mRNA	AK313439.1	231	AKR1B1	aldo-keto reductase family 1, member B1 (aldose reductase)	0.279997	0.0254945	6.65937
620	Pyruvate metabolism	ALR2	Sus scrofa aldose reductase (ALR2), mRNA	AK313439.1	231	AKR1B1	aldo-keto reductase family 1, member B1 (aldose reductase)	0.293603	0.0261753	6.3264
4070	Phosphatidylinositol signaling system	PLCD4	Sus scrofa mRNA, clone:OVRM10050F12, expressed in ovary	AK299458.1	84812	PLCD4	phospholipase C, delta 4	0.307101	0.0268233	6.02515
5219	Bladder cancer	LOC100152215	PREDICTED: Sus scrofa similar to LOC513497 protein (LOC100152215), mRNA	AB451290.1	1026	CDKN1A	cyclin-dependent kinase inhibitor 1A (p21, Cip1)	0.307101	0.0268233	6.02515
4070	Phosphatidylinositol signaling system	PLCD4	Sus scrofa phospholipase C, delta 4 (PLCD4), mRNA	EU176403.1	84812	PLCD4	phospholipase C, delta 4	0.307101	0.0268233	6.02515
562	Inositol phosphate metabolism	PLCD4	Sus scrofa mRNA, clone:OVRM10050F12, expressed in ovary	AK299458.1	84812	PLCD4	phospholipase C, delta 4	0.320493	0.0274407	5.75128
280	Valine, leucine and isoleucine degradation	ACADM	Sus scrofa acyl-Coenzyme A dehydrogenase, C-4 to C-12 straight chain (ACADM), nuclear gene encoding mitochondrial protein, mRNA	NM_000016.4	34	ACADM	acyl-Coenzyme A dehydrogenase, C-4 to C-12 straight chain	0.320493	0.0274407	5.75128
562	Inositol phosphate metabolism	PLCD4	Sus scrofa phospholipase C, delta 4 (PLCD4), mRNA	EU176403.1	84812	PLCD4	phospholipase C, delta 4	0.320493	0.0274407	5.75128
564	Glycerophospholipid metabolism	LOC100152491	PREDICTED: Sus scrofa similar to Lysophospholipase I (LOC100152491), partial mRNA	BC010397.1	10434	LYPLA1	lysophospholipase I	0.33378	0.028066	5.50122
980	Metabolism of xenobiotics by cytochrome P450	EPHX1	Sus scrofa mRNA, clone:OVRM10187H12, expressed in ovary	NM_000120.3	2052	EPHX1	epoxide hydrolase 1, microsomal (xenobiotic)	0.346962	0.0286647	5.272
5214	Glioma	LOC100152215	PREDICTED: Sus scrofa similar to LOC513497 protein (LOC100152215), mRNA	AB451290.1	1026	CDKN1A	cyclin-dependent kinase inhibitor 1A (p21, Cip1)	0.38589	0.0305334	4.68623
5211	Renal cell carcinoma	TGFB3	Sus scrofa mRNA, clone:OVRM10183D03, expressed in ovary	NM_003239.2	7043	TGFB3	transforming growth factor, beta 3	0.398662	0.0311126	4.51886
5211	Renal cell carcinoma	TGFB3	Sus scrofa transforming growth factor, beta 3 (TGFB3), mRNA	NM_003239.2	7043	TGFB3	transforming growth factor, beta 3	0.398662	0.0311126	4.51886
4520	Adherens junction	LOC100157406	PREDICTED: Sus scrofa similar to Actinin, alpha 2 (LOC100157406), mRNA	NM_001103.2	88	ACTN2	actinin, alpha 2	0.411334	0.0316719	4.36304
5218	Melanoma	LOC100152215	PREDICTED: Sus scrofa similar to LOC513497 protein (LOC100152215), mRNA	AB451290.1	1026	CDKN1A	cyclin-dependent kinase inhibitor 1A (p21, Cip1)	0.423906	0.0322121	4.2176
590	Arachidonic acid metabolism	PTGS1	PREDICTED: Sus scrofa prostaglandin-endoperoxide synthase 1 (PTGS1), mRNA	NM_000962.2	5742	PTGS1	prostaglandin-endoperoxide synthase 1 (prostaglandin G/H synthase and cyclooxygenase)	0.448754	0.0332391	3.954
4115	p53 signaling pathway	LOC100152215	PREDICTED: Sus scrofa similar to LOC513497 protein (LOC100152215), mRNA	AB451290.1	1026	CDKN1A	cyclin-dependent kinase inhibitor 1A (p21, Cip1)	0.448754	0.0332391	3.954
4730	Long-term depression	RYR1	Sus scrofa ryanodine receptor 1 (RYR1), mRNA	NM_001042723.1	6261	RYR1	ryanodine receptor 1 (skeletal)	0.461031	0.0337277	3.83418
5210	Colorectal cancer	TGFB3	Sus scrofa mRNA, clone:OVRM10183D03, expressed in ovary	NM_003239.2	7043	TGFB3	transforming growth factor, beta 3	0.497287	0.0351027	3.51467
5210	Colorectal cancer	TGFB3	Sus scrofa transforming growth factor, beta 3 (TGFB3), mRNA	NM_003239.2	7043	TGFB3	transforming growth factor, beta 3	0.497287	0.0351027	3.51467
4012	ErbB signaling pathway	LOC100152215	PREDICTED: Sus scrofa similar to LOC513497 protein (LOC100152215), mRNA	AB451290.1	1026	CDKN1A	cyclin-dependent kinase inhibitor 1A (p21, Cip1)	0.509183	0.035533	3.41968
5212	Pancreatic cancer	TGFB3	Sus scrofa mRNA, clone:OVRM10183D03, expressed in ovary	NM_003239.2	7043	TGFB3	transforming growth factor, beta 3	0.520985	0.0359504	3.32969
5222	Small cell lung cancer	PIAP	Sus scrofa putative inhibitor of apoptosis (PIAP), mRNA	NM_182962.1	330	BIRC3	baculoviral IAP repeat-containing 3	0.520985	0.0359504	3.32969
5212	Pancreatic cancer	TGFB3	Sus scrofa transforming growth factor, beta 3 (TGFB3), mRNA	NM_003239.2	7043	TGFB3	transforming growth factor, beta 3	0.520985	0.0359504	3.32969
4540	Gap junction	LOC100151951	PREDICTED: Sus scrofa similar to alpha-tubulin isotype M-alpha-6 (LOC100151951), mRNA	AK054731.1	7277	TUBA4A	tubulin, alpha 4a	0.532694	0.0363553	3.24431
4120	Ubiquitin mediated proteolysis	PIAP	Sus scrofa putative inhibitor of apoptosis (PIAP), mRNA	NM_182962.1	330	BIRC3	baculoviral IAP repeat-containing 3	0.555836	0.0372128	3.08605
4270	Vascular smooth muscle contraction	RAMP1	Sus scrofa receptor (G protein-coupled) activity modifying protein 1 (RAMP1), mRNA	NM_005855.2	10267	RAMP1	receptor (G protein-coupled) activity modifying protein 1	0.56727	0.0376246	3.01257
4360	Axon guidance	UNC-6	Sus scrofa netrin-1 (UNC-6), mRNA	NM_004822.2	9423	NTN1	netrin 1	0.601037	0.0390362	2.81174
4210	Apoptosis	PIAP	Sus scrofa putative inhibitor of apoptosis (PIAP), mRNA	NM_182962.1	330	BIRC3	baculoviral IAP repeat-containing 3	0.612115	0.0394866	2.75061
4910	Insulin signaling pathway	EIF4E2	Sus scrofa mRNA, clone:OVR010011G07, expressed in ovary	AB209519.1	9470	EIF4E2	eukaryotic translation initiation factor 4E family member 2	0.655565	0.041506	2.53056
4910	Insulin signaling pathway	EIF4E2	Sus scrofa eukaryotic translation initiation factor 4E family member 2 (EIF4E2), mRNA	BC021690.1	9470	EIF4E2	eukaryotic translation initiation factor 4E family member 2	0.655565	0.041506	2.53056
4142	Lysosome	CTSB	Sus scrofa mRNA, clone:LVR010036C01, expressed in liver	AK075393.1	1508	CTSB	cathepsin B	0.655565	0.041506	2.53056
4514	Cell adhesion molecules (CAMs)	CDH5	Sus scrofa cadherin 5 (CDH5), mRNA	AK300461.1	1003	CDH5	cadherin 5, type 2 (vascular endothelium)	0.787646	0.0494549	2.00838

## Sheet: LR2 vs LR1-down regulation
path_id	path_name	pig_Gene symbol	pig_Description	human_Genebank	human_Gene ID	human_Gene	human_Gene des	pvalue	FDR	enrichment
1100	Metabolic pathways	NFKB1	Sus scrofa nuclear factor of kappa light polypeptide gene enhancer in B-cells 1 (NFKB1), mRNA	NM_003998.3	4790	NFKB1	nuclear factor of kappa light polypeptide gene enhancer in B-cells 1	1.2471e-14	5.20919e-13	4.70201
1100	Metabolic pathways	LOC100155893	Sus scrofa mRNA, clone:AMP010005E06, expressed in alveolar macrophage	AK312484.1	384	ARG2	arginase, type II	1.2471e-14	5.20919e-13	4.70201
1100	Metabolic pathways	FUT8	Sus scrofa mRNA, clone:AMP010005H10, expressed in alveolar macrophage	NM_178154.1	2530	FUT8	fucosyltransferase 8 (alpha (1,6) fucosyltransferase)	1.2471e-14	5.20919e-13	4.70201
1100	Metabolic pathways	SGMS1	Sus scrofa sphingomyelin synthase 1 (SGMS1), mRNA	AY280959.1	259230	SGMS1	sphingomyelin synthase 1	1.2471e-14	5.20919e-13	4.70201
1100	Metabolic pathways	SDHD	Sus scrofa succinate dehydrogenase complex, subunit D, integral membrane protein (SDHD), nuclear gene encoding mitochondrial protein, mRNA	BC012603.1	6392	SDHD	succinate dehydrogenase complex, subunit D, integral membrane protein	1.2471e-14	5.20919e-13	4.70201
1100	Metabolic pathways	QDPR	Sus scrofa quinoid dihydropteridine reductase (QDPR), mRNA	AK223437.1	5860	QDPR	quinoid dihydropteridine reductase	1.2471e-14	5.20919e-13	4.70201
1100	Metabolic pathways	IDH3B	Sus scrofa isocitrate dehydrogenase 3 (NAD+) beta (IDH3B), nuclear gene encoding mitochondrial protein, mRNA	BX647393.1	3420	IDH3B	isocitrate dehydrogenase 3 (NAD+) beta	1.2471e-14	5.20919e-13	4.70201
1100	Metabolic pathways	SQLE	Sus scrofa squalene epoxidase (SQLE), mRNA	AK225085.1	6713	SQLE	squalene epoxidase	1.2471e-14	5.20919e-13	4.70201
1100	Metabolic pathways	ACL	Sus scrofa ATP citrate lyase (ACL), mRNA	AK295675.1	47	ACLY	ATP citrate lyase	1.2471e-14	5.20919e-13	4.70201
1100	Metabolic pathways	GUSB	Sus scrofa glucuronidase, beta (GUSB), mRNA	NM_000181.3	2990	GUSB	glucuronidase, beta	1.2471e-14	5.20919e-13	4.70201
1100	Metabolic pathways	LOC100155326	PREDICTED: Sus scrofa similar to PRDX3 protein (LOC100155326), mRNA	NM_002451.3	4507	MTAP	methylthioadenosine phosphorylase	1.2471e-14	5.20919e-13	4.70201
1100	Metabolic pathways	LOC100156261	PREDICTED: Sus scrofa similar to Chondroitin sulfate synthase 1 (Glucuronosyl-N-acetylgalactosaminyl-proteoglycan 4-beta-N-acetylgalactosaminyltransferase 1) (N-acetylgalactosaminyl-proteoglycan 3-beta-glucuronosyltransferase 1) (Chondroitin glucuronyltra	BC046247.1	22856	CHSY1	chondroitin sulfate synthase 1	1.2471e-14	5.20919e-13	4.70201
1100	Metabolic pathways	ENPP1	PREDICTED: Sus scrofa ectonucleotide pyrophosphatase/phosphodiesterase 1 (ENPP1), mRNA	NM_006208.2	5167	ENPP1	ectonucleotide pyrophosphatase/phosphodiesterase 1	1.2471e-14	5.20919e-13	4.70201
1100	Metabolic pathways	LOC100156649	PREDICTED: Sus scrofa similar to UDP-N-acteylglucosamine pyrophosphorylase 1 (LOC100156649), mRNA	NM_003115.4	6675	UAP1	UDP-N-acteylglucosamine pyrophosphorylase 1	1.2471e-14	5.20919e-13	4.70201
1100	Metabolic pathways	LOC100156809	PREDICTED: Sus scrofa similar to Phosphatidylserine synthase 1 (LOC100156809), mRNA	BC002376.2	9791	PTDSS1	phosphatidylserine synthase 1	1.2471e-14	5.20919e-13	4.70201
1100	Metabolic pathways	LOC100155893	PREDICTED: Sus scrofa similar to arginase, type II (LOC100155893), mRNA	NM_001172.3	384	ARG2	arginase, type II	1.2471e-14	5.20919e-13	4.70201
1100	Metabolic pathways	LOC100156262	PREDICTED: Sus scrofa similar to 3-phosphoadenosine 5-phosphosulfate synthase 2 (LOC100156262), mRNA	NM_004670.3	9060	PAPSS2	3'-phosphoadenosine 5'-phosphosulfate synthase 2	1.2471e-14	5.20919e-13	4.70201
1100	Metabolic pathways	LOC100152232	PREDICTED: Sus scrofa similar to cytochrome c oxidase subunit VIa polypeptide 1 (LOC100152232), mRNA	NG_004806.3	285849	COX6A1P2	cytochrome c oxidase subunit VIa polypeptide 1 pseudogene 2	1.2471e-14	5.20919e-13	4.70201
1100	Metabolic pathways	LOC100153506	PREDICTED: Sus scrofa similar to Phosphatidylserine decarboxylase proenzyme (LOC100153506), mRNA	CR611660.1	23761	PISD	phosphatidylserine decarboxylase	1.2471e-14	5.20919e-13	4.70201
1100	Metabolic pathways	LOC100157143	PREDICTED: Sus scrofa similar to Phosphatidylinositol 4-kinase alpha (PI4-kinase alpha) (PtdIns-4-kinase alpha) (PI4K-alpha) (LOC100157143), mRNA	AK302424.1	5297	PI4KA	phosphatidylinositol 4-kinase, catalytic, alpha	1.2471e-14	5.20919e-13	4.70201
1100	Metabolic pathways	GOT2	Sus scrofa glutamic-oxaloacetic transaminase 2, mitochondrial (aspartate aminotransferase 2) (GOT2), nuclear gene encoding mitochondrial protein, mRNA	NM_002080.2	2806	GOT2	glutamic-oxaloacetic transaminase 2, mitochondrial (aspartate aminotransferase 2)	1.2471e-14	5.20919e-13	4.70201
1100	Metabolic pathways	HEXB	Sus scrofa hexosaminidase B (beta polypeptide) (HEXB), mRNA	NM_000521.3	3074	HEXB	hexosaminidase B (beta polypeptide)	1.2471e-14	5.20919e-13	4.70201
1100	Metabolic pathways	GANAB	Sus scrofa glucosidase II (G2AN), mRNA	NM_198334.1	23193	GANAB	glucosidase, alpha; neutral AB	1.2471e-14	5.20919e-13	4.70201
1100	Metabolic pathways	MAN1A	Sus scrofa Man9-mannosidase (MAN1A), mRNA	NM_005907.2	4121	MAN1A1	mannosidase, alpha, class 1A, member 1	1.2471e-14	5.20919e-13	4.70201
1100	Metabolic pathways	HADHA	Sus scrofa hydroxyacyl-Coenzyme A dehydrogenase/3-ketoacyl-Coenzyme A thiolase/enoyl-Coenzyme A hydratase (trifunctional protein), alpha subunit (HADHA), nuclear gene encoding mitochondrial protein, mRNA	NM_000182.4	3030	HADHA	hydroxyacyl-Coenzyme A dehydrogenase/3-ketoacyl-Coenzyme A thiolase/enoyl-Coenzyme A hydratase (trifunctional protein), alpha subunit	1.2471e-14	5.20919e-13	4.70201
1100	Metabolic pathways	DLD	Sus scrofa dihydrolipoamide dehydrogenase (DLD), mRNA	NM_000108.3	1738	DLD	dihydrolipoamide dehydrogenase	1.2471e-14	5.20919e-13	4.70201
1100	Metabolic pathways	ATP6V1H	Sus scrofa ATPase, H+ transporting, lysosomal 50/57kDa, V1 subunit H (ATP6V1H), mRNA	NM_015941.2	51606	ATP6V1H	ATPase, H+ transporting, lysosomal 50/57kDa, V1 subunit H	1.2471e-14	5.20919e-13	4.70201
1100	Metabolic pathways	PAFAH1B1	Sus scrofa platelet-activating factor acetylhydrolase, isoform Ib, alpha subunit 45kDa (PAFAH1B1), mRNA	NM_000430.3	5048	PAFAH1B1	platelet-activating factor acetylhydrolase 1b, regulatory subunit 1 (45kDa)	1.2471e-14	5.20919e-13	4.70201
1100	Metabolic pathways	CS	Sus scrofa citrate synthase (CS), nuclear gene encoding mitochondrial protein, mRNA	BC072016.1	1431	CS	citrate synthase	1.2471e-14	5.20919e-13	4.70201
1100	Metabolic pathways	B3GNT5	Sus scrofa UDP-GlcNAc:betaGal beta-1,3-N-acetylglucosaminyltransferase 5 (B3GNT5), mRNA	NM_032047.4	84002	B3GNT5	UDP-GlcNAc:betaGal beta-1,3-N-acetylglucosaminyltransferase 5	1.2471e-14	5.20919e-13	4.70201
1100	Metabolic pathways	GPI	Sus scrofa glucose phosphate isomerase (GPI), mRNA	NM_000175.2	2821	GPI	glucose phosphate isomerase	1.2471e-14	5.20919e-13	4.70201
1100	Metabolic pathways	DLST	Sus scrofa dihydrolipoamide S-succinyltransferase (E2 component of 2-oxo-glutarate complex) (DLST), mRNA	BC001922.1	1743	DLST	dihydrolipoamide S-succinyltransferase (E2 component of 2-oxo-glutarate complex)	1.2471e-14	5.20919e-13	4.70201
1100	Metabolic pathways	CYP51	Sus scrofa cytochrome P450 51 (CYP51), mRNA	NM_000786.3	1595	CYP51A1	cytochrome P450, family 51, subfamily A, polypeptide 1	1.2471e-14	5.20919e-13	4.70201
1100	Metabolic pathways	HYAL2	Sus scrofa hyaluronoglucosaminidase 2 (HYAL2), mRNA	BC000692.2	8692	HYAL2	hyaluronoglucosaminidase 2	1.2471e-14	5.20919e-13	4.70201
1100	Metabolic pathways	PIK3C3	Sus scrofa phosphoinositide-3-kinase, class 3 (PIK3C3), mRNA	BC053651.1	5289	PIK3C3	phosphoinositide-3-kinase, class 3	1.2471e-14	5.20919e-13	4.70201
1100	Metabolic pathways	DNMT1	Sus scrofa DNA (cytosine-5-)-methyltransferase 1 (DNMT1), mRNA	NM_001379.2	1786	DNMT1	DNA (cytosine-5-)-methyltransferase 1	1.2471e-14	5.20919e-13	4.70201
1100	Metabolic pathways	PIGK	Sus scrofa phosphatidylinositol glycan anchor biosynthesis, class K (PIGK), mRNA	NM_005482.2	10026	PIGK	phosphatidylinositol glycan anchor biosynthesis, class K	1.2471e-14	5.20919e-13	4.70201
1100	Metabolic pathways	LOC654407	Sus scrofa microsomal prostaglandin E synthase-1 (LOC654407), mRNA	NM_004878.4	9536	PTGES	prostaglandin E synthase	1.2471e-14	5.20919e-13	4.70201
4510	Focal adhesion	THBS1	PREDICTED: Sus scrofa thrombospondin 1 (THBS1), mRNA	BC136470.1	7057	THBS1	thrombospondin 1	3.34402e-10	6.98405e-09	9.63508
4510	Focal adhesion	LOC100156321	PREDICTED: Sus scrofa similar to SHC-transforming protein 1 (SH2 domain protein C1) (Src homology 2 domain-containing-transforming protein C1), transcript variant 2 (LOC100156321), mRNA	NM_003029.4	6464	SHC1	SHC (Src homology 2 domain containing) transforming protein 1	3.34402e-10	6.98405e-09	9.63508
4510	Focal adhesion	COLL11A1	PREDICTED: Sus scrofa collagen type XI alpha 1 (COLL11A1), mRNA	NM_001854.3	1301	COL11A1	collagen, type XI, alpha 1	3.34402e-10	6.98405e-09	9.63508
4510	Focal adhesion	LOC100155091	PREDICTED: Sus scrofa similar to integrin, alpha 5 (fibronectin receptor, alpha polypeptide) (LOC100155091), mRNA	NM_002205.2	3678	ITGA5	integrin, alpha 5 (fibronectin receptor, alpha polypeptide)	3.34402e-10	6.98405e-09	9.63508
4510	Focal adhesion	LOC100152519	PREDICTED: Sus scrofa similar to Integrin beta-5 (LOC100152519), mRNA	CR609293.1	3693	ITGB5	integrin, beta 5	3.34402e-10	6.98405e-09	9.63508
4510	Focal adhesion	LOC100154503	PREDICTED: Sus scrofa similar to v-src sarcoma (Schmidt-Ruppin A-2) viral oncogene homolog (LOC100154503), mRNA	BC051270.1	6714	SRC	v-src sarcoma (Schmidt-Ruppin A-2) viral oncogene homolog (avian)	3.34402e-10	6.98405e-09	9.63508
4510	Focal adhesion	CRK	Sus scrofa v-crk sarcoma virus CT10 oncogene homolog (avian) (CRK), mRNA	BC001718.1	1398	CRK	v-crk sarcoma virus CT10 oncogene homolog (avian)	3.34402e-10	6.98405e-09	9.63508
4510	Focal adhesion	VCL	S.scrofa metavinculin cDNA	AL832130.1	7414	VCL	vinculin	3.34402e-10	6.98405e-09	9.63508
4510	Focal adhesion	VCL	Sus scrofa vinculin (VCL), mRNA	NM_003373.3	7414	VCL	vinculin	3.34402e-10	6.98405e-09	9.63508
4510	Focal adhesion	ITGB1	Sus scrofa integrin, beta 1 (fibronectin receptor, beta polypeptide, antigen CD29 includes MDF2, MSK12) (ITGB1), mRNA	BC020057.1	3688	ITGB1	integrin, beta 1 (fibronectin receptor, beta polypeptide, antigen CD29 includes MDF2, MSK12)	3.34402e-10	6.98405e-09	9.63508
4510	Focal adhesion	GPIIB	Sus scrofa glycoprotein IIb (GPIIB), mRNA	BC126442.1	3674	ITGA2B	integrin, alpha 2b (platelet glycoprotein IIb of IIb/IIIa complex, antigen CD41)	3.34402e-10	6.98405e-09	9.63508
4510	Focal adhesion	TNC	Sus scrofa tenascin C (TNC), mRNA	NM_002160.2	3371	TNC	tenascin C	3.34402e-10	6.98405e-09	9.63508
4510	Focal adhesion	PTEN	PREDICTED: Sus scrofa similar to MMAC1 (LOC100156264), mRNA					3.34402e-10	6.98405e-09	9.63508
4510	Focal adhesion	COL5A1	BX668018 Sus Scrofa library (scac) Sus scrofa cDNA clone scac0026.p.19 5prim, mRNA sequence					3.34402e-10	6.98405e-09	9.63508
4510	Focal adhesion	LOC733612	AJ952110 KN404_1 Sus scrofa cDNA clone C0007745h04 3', mRNA sequence					3.34402e-10	6.98405e-09	9.63508
1070	Biosynthesis of plant hormones	SDHD	Sus scrofa succinate dehydrogenase complex, subunit D, integral membrane protein (SDHD), nuclear gene encoding mitochondrial protein, mRNA	BC012603.1	6392	SDHD	succinate dehydrogenase complex, subunit D, integral membrane protein	4.01909e-09	4.94501e-08	13.5879
1070	Biosynthesis of plant hormones	IDH3B	Sus scrofa isocitrate dehydrogenase 3 (NAD+) beta (IDH3B), nuclear gene encoding mitochondrial protein, mRNA	BX647393.1	3420	IDH3B	isocitrate dehydrogenase 3 (NAD+) beta	4.01909e-09	4.94501e-08	13.5879
1070	Biosynthesis of plant hormones	SQLE	Sus scrofa squalene epoxidase (SQLE), mRNA	AK225085.1	6713	SQLE	squalene epoxidase	4.01909e-09	4.94501e-08	13.5879
1070	Biosynthesis of plant hormones	ACL	Sus scrofa ATP citrate lyase (ACL), mRNA	AK295675.1	47	ACLY	ATP citrate lyase	4.01909e-09	4.94501e-08	13.5879
1070	Biosynthesis of plant hormones	GOT2	Sus scrofa glutamic-oxaloacetic transaminase 2, mitochondrial (aspartate aminotransferase 2) (GOT2), nuclear gene encoding mitochondrial protein, mRNA	NM_002080.2	2806	GOT2	glutamic-oxaloacetic transaminase 2, mitochondrial (aspartate aminotransferase 2)	4.01909e-09	4.94501e-08	13.5879
1070	Biosynthesis of plant hormones	DLD	Sus scrofa dihydrolipoamide dehydrogenase (DLD), mRNA	NM_000108.3	1738	DLD	dihydrolipoamide dehydrogenase	4.01909e-09	4.94501e-08	13.5879
1070	Biosynthesis of plant hormones	CS	Sus scrofa citrate synthase (CS), nuclear gene encoding mitochondrial protein, mRNA	BC072016.1	1431	CS	citrate synthase	4.01909e-09	4.94501e-08	13.5879
1070	Biosynthesis of plant hormones	GPI	Sus scrofa glucose phosphate isomerase (GPI), mRNA	NM_000175.2	2821	GPI	glucose phosphate isomerase	4.01909e-09	4.94501e-08	13.5879
1070	Biosynthesis of plant hormones	DLST	Sus scrofa dihydrolipoamide S-succinyltransferase (E2 component of 2-oxo-glutarate complex) (DLST), mRNA	BC001922.1	1743	DLST	dihydrolipoamide S-succinyltransferase (E2 component of 2-oxo-glutarate complex)	4.01909e-09	4.94501e-08	13.5879
1070	Biosynthesis of plant hormones	CYP51	Sus scrofa cytochrome P450 51 (CYP51), mRNA	NM_000786.3	1595	CYP51A1	cytochrome P450, family 51, subfamily A, polypeptide 1	4.01909e-09	4.94501e-08	13.5879
1064	Biosynthesis of alkaloids derived from ornithine, lysine and nicotinic acid	LOC100155893	Sus scrofa mRNA, clone:AMP010005E06, expressed in alveolar macrophage	AK312484.1	384	ARG2	arginase, type II	5.61744e-09	5.86606e-08	15.8979
1064	Biosynthesis of alkaloids derived from ornithine, lysine and nicotinic acid	SDHD	Sus scrofa succinate dehydrogenase complex, subunit D, integral membrane protein (SDHD), nuclear gene encoding mitochondrial protein, mRNA	BC012603.1	6392	SDHD	succinate dehydrogenase complex, subunit D, integral membrane protein	5.61744e-09	5.86606e-08	15.8979
1064	Biosynthesis of alkaloids derived from ornithine, lysine and nicotinic acid	IDH3B	Sus scrofa isocitrate dehydrogenase 3 (NAD+) beta (IDH3B), nuclear gene encoding mitochondrial protein, mRNA	BX647393.1	3420	IDH3B	isocitrate dehydrogenase 3 (NAD+) beta	5.61744e-09	5.86606e-08	15.8979
1064	Biosynthesis of alkaloids derived from ornithine, lysine and nicotinic acid	ACL	Sus scrofa ATP citrate lyase (ACL), mRNA	AK295675.1	47	ACLY	ATP citrate lyase	5.61744e-09	5.86606e-08	15.8979
1064	Biosynthesis of alkaloids derived from ornithine, lysine and nicotinic acid	LOC100155893	PREDICTED: Sus scrofa similar to arginase, type II (LOC100155893), mRNA	NM_001172.3	384	ARG2	arginase, type II	5.61744e-09	5.86606e-08	15.8979
1064	Biosynthesis of alkaloids derived from ornithine, lysine and nicotinic acid	GOT2	Sus scrofa glutamic-oxaloacetic transaminase 2, mitochondrial (aspartate aminotransferase 2) (GOT2), nuclear gene encoding mitochondrial protein, mRNA	NM_002080.2	2806	GOT2	glutamic-oxaloacetic transaminase 2, mitochondrial (aspartate aminotransferase 2)	5.61744e-09	5.86606e-08	15.8979
1064	Biosynthesis of alkaloids derived from ornithine, lysine and nicotinic acid	DLD	Sus scrofa dihydrolipoamide dehydrogenase (DLD), mRNA	NM_000108.3	1738	DLD	dihydrolipoamide dehydrogenase	5.61744e-09	5.86606e-08	15.8979
1064	Biosynthesis of alkaloids derived from ornithine, lysine and nicotinic acid	CS	Sus scrofa citrate synthase (CS), nuclear gene encoding mitochondrial protein, mRNA	BC072016.1	1431	CS	citrate synthase	5.61744e-09	5.86606e-08	15.8979
1064	Biosynthesis of alkaloids derived from ornithine, lysine and nicotinic acid	GPI	Sus scrofa glucose phosphate isomerase (GPI), mRNA	NM_000175.2	2821	GPI	glucose phosphate isomerase	5.61744e-09	5.86606e-08	15.8979
1064	Biosynthesis of alkaloids derived from ornithine, lysine and nicotinic acid	DLST	Sus scrofa dihydrolipoamide S-succinyltransferase (E2 component of 2-oxo-glutarate complex) (DLST), mRNA	BC001922.1	1743	DLST	dihydrolipoamide S-succinyltransferase (E2 component of 2-oxo-glutarate complex)	5.61744e-09	5.86606e-08	15.8979
1062	Biosynthesis of terpenoids and steroids	SDHD	Sus scrofa succinate dehydrogenase complex, subunit D, integral membrane protein (SDHD), nuclear gene encoding mitochondrial protein, mRNA	BC012603.1	6392	SDHD	succinate dehydrogenase complex, subunit D, integral membrane protein	1.06506e-08	8.64528e-08	14.9043
1062	Biosynthesis of terpenoids and steroids	IDH3B	Sus scrofa isocitrate dehydrogenase 3 (NAD+) beta (IDH3B), nuclear gene encoding mitochondrial protein, mRNA	BX647393.1	3420	IDH3B	isocitrate dehydrogenase 3 (NAD+) beta	1.06506e-08	8.64528e-08	14.9043
1062	Biosynthesis of terpenoids and steroids	SQLE	Sus scrofa squalene epoxidase (SQLE), mRNA	AK225085.1	6713	SQLE	squalene epoxidase	1.06506e-08	8.64528e-08	14.9043
1062	Biosynthesis of terpenoids and steroids	ACL	Sus scrofa ATP citrate lyase (ACL), mRNA	AK295675.1	47	ACLY	ATP citrate lyase	1.06506e-08	8.64528e-08	14.9043
1062	Biosynthesis of terpenoids and steroids	DLD	Sus scrofa dihydrolipoamide dehydrogenase (DLD), mRNA	NM_000108.3	1738	DLD	dihydrolipoamide dehydrogenase	1.06506e-08	8.64528e-08	14.9043
1062	Biosynthesis of terpenoids and steroids	CS	Sus scrofa citrate synthase (CS), nuclear gene encoding mitochondrial protein, mRNA	BC072016.1	1431	CS	citrate synthase	1.06506e-08	8.64528e-08	14.9043
1062	Biosynthesis of terpenoids and steroids	GPI	Sus scrofa glucose phosphate isomerase (GPI), mRNA	NM_000175.2	2821	GPI	glucose phosphate isomerase	1.06506e-08	8.64528e-08	14.9043
1062	Biosynthesis of terpenoids and steroids	DLST	Sus scrofa dihydrolipoamide S-succinyltransferase (E2 component of 2-oxo-glutarate complex) (DLST), mRNA	BC001922.1	1743	DLST	dihydrolipoamide S-succinyltransferase (E2 component of 2-oxo-glutarate complex)	1.06506e-08	8.64528e-08	14.9043
1062	Biosynthesis of terpenoids and steroids	CYP51	Sus scrofa cytochrome P450 51 (CYP51), mRNA	NM_000786.3	1595	CYP51A1	cytochrome P450, family 51, subfamily A, polypeptide 1	1.06506e-08	8.64528e-08	14.9043
1066	Biosynthesis of alkaloids derived from terpenoid and polyketide	SDHD	Sus scrofa succinate dehydrogenase complex, subunit D, integral membrane protein (SDHD), nuclear gene encoding mitochondrial protein, mRNA	BC012603.1	6392	SDHD	succinate dehydrogenase complex, subunit D, integral membrane protein	1.44019e-08	1.00262e-07	14.4526
1066	Biosynthesis of alkaloids derived from terpenoid and polyketide	IDH3B	Sus scrofa isocitrate dehydrogenase 3 (NAD+) beta (IDH3B), nuclear gene encoding mitochondrial protein, mRNA	BX647393.1	3420	IDH3B	isocitrate dehydrogenase 3 (NAD+) beta	1.44019e-08	1.00262e-07	14.4526
1066	Biosynthesis of alkaloids derived from terpenoid and polyketide	SQLE	Sus scrofa squalene epoxidase (SQLE), mRNA	AK225085.1	6713	SQLE	squalene epoxidase	1.44019e-08	1.00262e-07	14.4526
1066	Biosynthesis of alkaloids derived from terpenoid and polyketide	ACL	Sus scrofa ATP citrate lyase (ACL), mRNA	AK295675.1	47	ACLY	ATP citrate lyase	1.44019e-08	1.00262e-07	14.4526
1066	Biosynthesis of alkaloids derived from terpenoid and polyketide	DLD	Sus scrofa dihydrolipoamide dehydrogenase (DLD), mRNA	NM_000108.3	1738	DLD	dihydrolipoamide dehydrogenase	1.44019e-08	1.00262e-07	14.4526
1066	Biosynthesis of alkaloids derived from terpenoid and polyketide	CS	Sus scrofa citrate synthase (CS), nuclear gene encoding mitochondrial protein, mRNA	BC072016.1	1431	CS	citrate synthase	1.44019e-08	1.00262e-07	14.4526
1066	Biosynthesis of alkaloids derived from terpenoid and polyketide	GPI	Sus scrofa glucose phosphate isomerase (GPI), mRNA	NM_000175.2	2821	GPI	glucose phosphate isomerase	1.44019e-08	1.00262e-07	14.4526
1066	Biosynthesis of alkaloids derived from terpenoid and polyketide	DLST	Sus scrofa dihydrolipoamide S-succinyltransferase (E2 component of 2-oxo-glutarate complex) (DLST), mRNA	BC001922.1	1743	DLST	dihydrolipoamide S-succinyltransferase (E2 component of 2-oxo-glutarate complex)	1.44019e-08	1.00262e-07	14.4526
1066	Biosynthesis of alkaloids derived from terpenoid and polyketide	CYP51	Sus scrofa cytochrome P450 51 (CYP51), mRNA	NM_000786.3	1595	CYP51A1	cytochrome P450, family 51, subfamily A, polypeptide 1	1.44019e-08	1.00262e-07	14.4526
4512	ECM-receptor interaction	THBS1	PREDICTED: Sus scrofa thrombospondin 1 (THBS1), mRNA	BC136470.1	7057	THBS1	thrombospondin 1	1.22488e-07	7.30912e-07	14.1315
4512	ECM-receptor interaction	COLL11A1	PREDICTED: Sus scrofa collagen type XI alpha 1 (COLL11A1), mRNA	NM_001854.3	1301	COL11A1	collagen, type XI, alpha 1	1.22488e-07	7.30912e-07	14.1315
4512	ECM-receptor interaction	LOC100155091	PREDICTED: Sus scrofa similar to integrin, alpha 5 (fibronectin receptor, alpha polypeptide) (LOC100155091), mRNA	NM_002205.2	3678	ITGA5	integrin, alpha 5 (fibronectin receptor, alpha polypeptide)	1.22488e-07	7.30912e-07	14.1315
4512	ECM-receptor interaction	LOC100152519	PREDICTED: Sus scrofa similar to Integrin beta-5 (LOC100152519), mRNA	CR609293.1	3693	ITGB5	integrin, beta 5	1.22488e-07	7.30912e-07	14.1315
4512	ECM-receptor interaction	ITGB1	Sus scrofa integrin, beta 1 (fibronectin receptor, beta polypeptide, antigen CD29 includes MDF2, MSK12) (ITGB1), mRNA	BC020057.1	3688	ITGB1	integrin, beta 1 (fibronectin receptor, beta polypeptide, antigen CD29 includes MDF2, MSK12)	1.22488e-07	7.30912e-07	14.1315
4512	ECM-receptor interaction	GPIIB	Sus scrofa glycoprotein IIb (GPIIB), mRNA	BC126442.1	3674	ITGA2B	integrin, alpha 2b (platelet glycoprotein IIb of IIb/IIIa complex, antigen CD41)	1.22488e-07	7.30912e-07	14.1315
4512	ECM-receptor interaction	TNC	Sus scrofa tenascin C (TNC), mRNA	NM_002160.2	3371	TNC	tenascin C	1.22488e-07	7.30912e-07	14.1315
4512	ECM-receptor interaction	COL5A1	BX668018 Sus Scrofa library (scac) Sus scrofa cDNA clone scac0026.p.19 5prim, mRNA sequence					1.22488e-07	7.30912e-07	14.1315
1061	Biosynthesis of phenylpropanoids	SDHD	Sus scrofa succinate dehydrogenase complex, subunit D, integral membrane protein (SDHD), nuclear gene encoding mitochondrial protein, mRNA	BC012603.1	6392	SDHD	succinate dehydrogenase complex, subunit D, integral membrane protein	7.82648e-07	3.76285e-06	14.2673
1061	Biosynthesis of phenylpropanoids	ACL	Sus scrofa ATP citrate lyase (ACL), mRNA	AK295675.1	47	ACLY	ATP citrate lyase	7.82648e-07	3.76285e-06	14.2673
1061	Biosynthesis of phenylpropanoids	GOT2	Sus scrofa glutamic-oxaloacetic transaminase 2, mitochondrial (aspartate aminotransferase 2) (GOT2), nuclear gene encoding mitochondrial protein, mRNA	NM_002080.2	2806	GOT2	glutamic-oxaloacetic transaminase 2, mitochondrial (aspartate aminotransferase 2)	7.82648e-07	3.76285e-06	14.2673
1061	Biosynthesis of phenylpropanoids	DLD	Sus scrofa dihydrolipoamide dehydrogenase (DLD), mRNA	NM_000108.3	1738	DLD	dihydrolipoamide dehydrogenase	7.82648e-07	3.76285e-06	14.2673
1061	Biosynthesis of phenylpropanoids	CS	Sus scrofa citrate synthase (CS), nuclear gene encoding mitochondrial protein, mRNA	BC072016.1	1431	CS	citrate synthase	7.82648e-07	3.76285e-06	14.2673
1061	Biosynthesis of phenylpropanoids	GPI	Sus scrofa glucose phosphate isomerase (GPI), mRNA	NM_000175.2	2821	GPI	glucose phosphate isomerase	7.82648e-07	3.76285e-06	14.2673
1061	Biosynthesis of phenylpropanoids	DLST	Sus scrofa dihydrolipoamide S-succinyltransferase (E2 component of 2-oxo-glutarate complex) (DLST), mRNA	BC001922.1	1743	DLST	dihydrolipoamide S-succinyltransferase (E2 component of 2-oxo-glutarate complex)	7.82648e-07	3.76285e-06	14.2673
20	Citrate cycle (TCA cycle)	SDHD	Sus scrofa succinate dehydrogenase complex, subunit D, integral membrane protein (SDHD), nuclear gene encoding mitochondrial protein, mRNA	BC012603.1	6392	SDHD	succinate dehydrogenase complex, subunit D, integral membrane protein	9.0469e-07	4.1988e-06	18.7034
20	Citrate cycle (TCA cycle)	IDH3B	Sus scrofa isocitrate dehydrogenase 3 (NAD+) beta (IDH3B), nuclear gene encoding mitochondrial protein, mRNA	BX647393.1	3420	IDH3B	isocitrate dehydrogenase 3 (NAD+) beta	9.0469e-07	4.1988e-06	18.7034
20	Citrate cycle (TCA cycle)	ACL	Sus scrofa ATP citrate lyase (ACL), mRNA	AK295675.1	47	ACLY	ATP citrate lyase	9.0469e-07	4.1988e-06	18.7034
20	Citrate cycle (TCA cycle)	DLD	Sus scrofa dihydrolipoamide dehydrogenase (DLD), mRNA	NM_000108.3	1738	DLD	dihydrolipoamide dehydrogenase	9.0469e-07	4.1988e-06	18.7034
20	Citrate cycle (TCA cycle)	CS	Sus scrofa citrate synthase (CS), nuclear gene encoding mitochondrial protein, mRNA	BC072016.1	1431	CS	citrate synthase	9.0469e-07	4.1988e-06	18.7034
20	Citrate cycle (TCA cycle)	DLST	Sus scrofa dihydrolipoamide S-succinyltransferase (E2 component of 2-oxo-glutarate complex) (DLST), mRNA	BC001922.1	1743	DLST	dihydrolipoamide S-succinyltransferase (E2 component of 2-oxo-glutarate complex)	9.0469e-07	4.1988e-06	18.7034
1063	Biosynthesis of alkaloids derived from shikimate pathway	SDHD	Sus scrofa succinate dehydrogenase complex, subunit D, integral membrane protein (SDHD), nuclear gene encoding mitochondrial protein, mRNA	BC012603.1	6392	SDHD	succinate dehydrogenase complex, subunit D, integral membrane protein	1.76838e-06	7.38656e-06	12.7914
1063	Biosynthesis of alkaloids derived from shikimate pathway	IDH3B	Sus scrofa isocitrate dehydrogenase 3 (NAD+) beta (IDH3B), nuclear gene encoding mitochondrial protein, mRNA	BX647393.1	3420	IDH3B	isocitrate dehydrogenase 3 (NAD+) beta	1.76838e-06	7.38656e-06	12.7914
1063	Biosynthesis of alkaloids derived from shikimate pathway	ACL	Sus scrofa ATP citrate lyase (ACL), mRNA	AK295675.1	47	ACLY	ATP citrate lyase	1.76838e-06	7.38656e-06	12.7914
1063	Biosynthesis of alkaloids derived from shikimate pathway	DLD	Sus scrofa dihydrolipoamide dehydrogenase (DLD), mRNA	NM_000108.3	1738	DLD	dihydrolipoamide dehydrogenase	1.76838e-06	7.38656e-06	12.7914
1063	Biosynthesis of alkaloids derived from shikimate pathway	CS	Sus scrofa citrate synthase (CS), nuclear gene encoding mitochondrial protein, mRNA	BC072016.1	1431	CS	citrate synthase	1.76838e-06	7.38656e-06	12.7914
1063	Biosynthesis of alkaloids derived from shikimate pathway	GPI	Sus scrofa glucose phosphate isomerase (GPI), mRNA	NM_000175.2	2821	GPI	glucose phosphate isomerase	1.76838e-06	7.38656e-06	12.7914
1063	Biosynthesis of alkaloids derived from shikimate pathway	DLST	Sus scrofa dihydrolipoamide S-succinyltransferase (E2 component of 2-oxo-glutarate complex) (DLST), mRNA	BC001922.1	1743	DLST	dihydrolipoamide S-succinyltransferase (E2 component of 2-oxo-glutarate complex)	1.76838e-06	7.38656e-06	12.7914
4810	Regulation of actin cytoskeleton	LOC100155091	PREDICTED: Sus scrofa similar to integrin, alpha 5 (fibronectin receptor, alpha polypeptide) (LOC100155091), mRNA	NM_002205.2	3678	ITGA5	integrin, alpha 5 (fibronectin receptor, alpha polypeptide)	2.86085e-06	1.06842e-05	7.06573
4810	Regulation of actin cytoskeleton	LOC100152519	PREDICTED: Sus scrofa similar to Integrin beta-5 (LOC100152519), mRNA	CR609293.1	3693	ITGB5	integrin, beta 5	2.86085e-06	1.06842e-05	7.06573
4810	Regulation of actin cytoskeleton	LOC100154518	PREDICTED: Sus scrofa similar to Actin-related protein 2/3 complex subunit 3 (Arp2/3 complex 21 kDa subunit) (p21-ARC) (LOC100154518), mRNA	NM_005719.2	10094	ARPC3	actin related protein 2/3 complex, subunit 3, 21kDa	2.86085e-06	1.06842e-05	7.06573
4810	Regulation of actin cytoskeleton	LOC100152387	PREDICTED: Sus scrofa similar to FYVE, RhoGEF and PH domain containing 1 (LOC100152387), mRNA	NM_004463.2	2245	FGD1	FYVE, RhoGEF and PH domain containing 1	2.86085e-06	1.06842e-05	7.06573
4810	Regulation of actin cytoskeleton	CRK	Sus scrofa v-crk sarcoma virus CT10 oncogene homolog (avian) (CRK), mRNA	BC001718.1	1398	CRK	v-crk sarcoma virus CT10 oncogene homolog (avian)	2.86085e-06	1.06842e-05	7.06573
4810	Regulation of actin cytoskeleton	VCL	S.scrofa metavinculin cDNA	AL832130.1	7414	VCL	vinculin	2.86085e-06	1.06842e-05	7.06573
4810	Regulation of actin cytoskeleton	VCL	Sus scrofa vinculin (VCL), mRNA	NM_003373.3	7414	VCL	vinculin	2.86085e-06	1.06842e-05	7.06573
4810	Regulation of actin cytoskeleton	ITGB1	Sus scrofa integrin, beta 1 (fibronectin receptor, beta polypeptide, antigen CD29 includes MDF2, MSK12) (ITGB1), mRNA	BC020057.1	3688	ITGB1	integrin, beta 1 (fibronectin receptor, beta polypeptide, antigen CD29 includes MDF2, MSK12)	2.86085e-06	1.06842e-05	7.06573
4810	Regulation of actin cytoskeleton	GPIIB	Sus scrofa glycoprotein IIb (GPIIB), mRNA	BC126442.1	3674	ITGA2B	integrin, alpha 2b (platelet glycoprotein IIb of IIb/IIIa complex, antigen CD41)	2.86085e-06	1.06842e-05	7.06573
4810	Regulation of actin cytoskeleton	RDX	Sus scrofa radixin (RDX), mRNA	AK312903.1	5962	RDX	radixin	2.86085e-06	1.06842e-05	7.06573
4810	Regulation of actin cytoskeleton	LOC733612	AJ952110 KN404_1 Sus scrofa cDNA clone C0007745h04 3', mRNA sequence					2.86085e-06	1.06842e-05	7.06573
5200	Pathways in cancer	KIT	Sus scrofa v-kit Hardy-Zuckerman 4 feline sarcoma viral oncogene homolog (KIT), mRNA	NM_001093772.1	3815	KIT	v-kit Hardy-Zuckerman 4 feline sarcoma viral oncogene homolog	4.47462e-06	1.44502e-05	4.99209
5200	Pathways in cancer	NFKB1	Sus scrofa nuclear factor of kappa light polypeptide gene enhancer in B-cells 1 (NFKB1), mRNA	NM_003998.3	4790	NFKB1	nuclear factor of kappa light polypeptide gene enhancer in B-cells 1	4.47462e-06	1.44502e-05	4.99209
5200	Pathways in cancer	BMP4	Sus scrofa bone morphogenetic protein 4 (BMP4), mRNA	BX161385.1	652	BMP4	bone morphogenetic protein 4	4.47462e-06	1.44502e-05	4.99209
5200	Pathways in cancer	RELA	Sus scrofa v-rel reticuloendotheliosis viral oncogene homolog A (avian) (RELA), mRNA	NM_021975.3	5970	RELA	v-rel reticuloendotheliosis viral oncogene homolog A (avian)	4.47462e-06	1.44502e-05	4.99209
5200	Pathways in cancer	HIF1A	Sus scrofa hypoxia inducible factor 1, alpha subunit (basic helix-loop-helix transcription factor) (HIF1A), mRNA	NM_001530.3	3091	HIF1A	hypoxia inducible factor 1, alpha subunit (basic helix-loop-helix transcription factor)	4.47462e-06	1.44502e-05	4.99209
5200	Pathways in cancer	CDK4	Sus scrofa cyclin-dependent kinase 4 (CDK4), mRNA	BC010153.2	1019	CDK4	cyclin-dependent kinase 4	4.47462e-06	1.44502e-05	4.99209
5200	Pathways in cancer	LOC100156170	PREDICTED: Sus scrofa similar to histone deacetylase 2 (LOC100156170), mRNA	BC148797.1	3066	HDAC2	histone deacetylase 2	4.47462e-06	1.44502e-05	4.99209
5200	Pathways in cancer	CRK	Sus scrofa v-crk sarcoma virus CT10 oncogene homolog (avian) (CRK), mRNA	BC001718.1	1398	CRK	v-crk sarcoma virus CT10 oncogene homolog (avian)	4.47462e-06	1.44502e-05	4.99209
5200	Pathways in cancer	ITGB1	Sus scrofa integrin, beta 1 (fibronectin receptor, beta polypeptide, antigen CD29 includes MDF2, MSK12) (ITGB1), mRNA	BC020057.1	3688	ITGB1	integrin, beta 1 (fibronectin receptor, beta polypeptide, antigen CD29 includes MDF2, MSK12)	4.47462e-06	1.44502e-05	4.99209
5200	Pathways in cancer	HSP90	Sus scrofa 90-kDa heat shock protein (HSP90), mRNA	NM_005348.3	3320	HSP90AA1	heat shock protein 90kDa alpha (cytosolic), class A member 1	4.47462e-06	1.44502e-05	4.99209
5200	Pathways in cancer	GPIIB	Sus scrofa glycoprotein IIb (GPIIB), mRNA	BC126442.1	3674	ITGA2B	integrin, alpha 2b (platelet glycoprotein IIb of IIb/IIIa complex, antigen CD41)	4.47462e-06	1.44502e-05	4.99209
5200	Pathways in cancer	SMAD4	Sus scrofa SMAD family member 4 (SMAD4), mRNA	NM_005359.5	4089	SMAD4	SMAD family member 4	4.47462e-06	1.44502e-05	4.99209
5200	Pathways in cancer	PTEN	PREDICTED: Sus scrofa similar to MMAC1 (LOC100156264), mRNA					4.47462e-06	1.44502e-05	4.99209
1065	Biosynthesis of alkaloids derived from histidine and purine	SDHD	Sus scrofa succinate dehydrogenase complex, subunit D, integral membrane protein (SDHD), nuclear gene encoding mitochondrial protein, mRNA	BC012603.1	6392	SDHD	succinate dehydrogenase complex, subunit D, integral membrane protein	4.53496e-06	1.45713e-05	11.2409
1065	Biosynthesis of alkaloids derived from histidine and purine	IDH3B	Sus scrofa isocitrate dehydrogenase 3 (NAD+) beta (IDH3B), nuclear gene encoding mitochondrial protein, mRNA	BX647393.1	3420	IDH3B	isocitrate dehydrogenase 3 (NAD+) beta	4.53496e-06	1.45713e-05	11.2409
1065	Biosynthesis of alkaloids derived from histidine and purine	ACL	Sus scrofa ATP citrate lyase (ACL), mRNA	AK295675.1	47	ACLY	ATP citrate lyase	4.53496e-06	1.45713e-05	11.2409
1065	Biosynthesis of alkaloids derived from histidine and purine	DLD	Sus scrofa dihydrolipoamide dehydrogenase (DLD), mRNA	NM_000108.3	1738	DLD	dihydrolipoamide dehydrogenase	4.53496e-06	1.45713e-05	11.2409
1065	Biosynthesis of alkaloids derived from histidine and purine	CS	Sus scrofa citrate synthase (CS), nuclear gene encoding mitochondrial protein, mRNA	BC072016.1	1431	CS	citrate synthase	4.53496e-06	1.45713e-05	11.2409
1065	Biosynthesis of alkaloids derived from histidine and purine	GPI	Sus scrofa glucose phosphate isomerase (GPI), mRNA	NM_000175.2	2821	GPI	glucose phosphate isomerase	4.53496e-06	1.45713e-05	11.2409
1065	Biosynthesis of alkaloids derived from histidine and purine	DLST	Sus scrofa dihydrolipoamide S-succinyltransferase (E2 component of 2-oxo-glutarate complex) (DLST), mRNA	BC001922.1	1743	DLST	dihydrolipoamide S-succinyltransferase (E2 component of 2-oxo-glutarate complex)	4.53496e-06	1.45713e-05	11.2409
5220	Chronic myeloid leukemia	NFKB1	Sus scrofa nuclear factor of kappa light polypeptide gene enhancer in B-cells 1 (NFKB1), mRNA	NM_003998.3	4790	NFKB1	nuclear factor of kappa light polypeptide gene enhancer in B-cells 1	8.43917e-06	2.51791e-05	10.3042
5220	Chronic myeloid leukemia	RELA	Sus scrofa v-rel reticuloendotheliosis viral oncogene homolog A (avian) (RELA), mRNA	NM_021975.3	5970	RELA	v-rel reticuloendotheliosis viral oncogene homolog A (avian)	8.43917e-06	2.51791e-05	10.3042
5220	Chronic myeloid leukemia	CDK4	Sus scrofa cyclin-dependent kinase 4 (CDK4), mRNA	BC010153.2	1019	CDK4	cyclin-dependent kinase 4	8.43917e-06	2.51791e-05	10.3042
5220	Chronic myeloid leukemia	LOC100156170	PREDICTED: Sus scrofa similar to histone deacetylase 2 (LOC100156170), mRNA	BC148797.1	3066	HDAC2	histone deacetylase 2	8.43917e-06	2.51791e-05	10.3042
5220	Chronic myeloid leukemia	LOC100156321	PREDICTED: Sus scrofa similar to SHC-transforming protein 1 (SH2 domain protein C1) (Src homology 2 domain-containing-transforming protein C1), transcript variant 2 (LOC100156321), mRNA	NM_003029.4	6464	SHC1	SHC (Src homology 2 domain containing) transforming protein 1	8.43917e-06	2.51791e-05	10.3042
5220	Chronic myeloid leukemia	CRK	Sus scrofa v-crk sarcoma virus CT10 oncogene homolog (avian) (CRK), mRNA	BC001718.1	1398	CRK	v-crk sarcoma virus CT10 oncogene homolog (avian)	8.43917e-06	2.51791e-05	10.3042
5220	Chronic myeloid leukemia	SMAD4	Sus scrofa SMAD family member 4 (SMAD4), mRNA	NM_005359.5	4089	SMAD4	SMAD family member 4	8.43917e-06	2.51791e-05	10.3042
4722	Neurotrophin signaling pathway	NFKB1	Sus scrofa nuclear factor of kappa light polypeptide gene enhancer in B-cells 1 (NFKB1), mRNA	NM_003998.3	4790	NFKB1	nuclear factor of kappa light polypeptide gene enhancer in B-cells 1	1.26906e-05	3.53395e-05	7.99893
4722	Neurotrophin signaling pathway	RELA	Sus scrofa v-rel reticuloendotheliosis viral oncogene homolog A (avian) (RELA), mRNA	NM_021975.3	5970	RELA	v-rel reticuloendotheliosis viral oncogene homolog A (avian)	1.26906e-05	3.53395e-05	7.99893
4722	Neurotrophin signaling pathway	ATF4	Sus scrofa activating transcription factor 4 (tax-responsive enhancer element B67) (ATF4), mRNA	BC073990.1	468	ATF4	activating transcription factor 4 (tax-responsive enhancer element B67)	1.26906e-05	3.53395e-05	7.99893
4722	Neurotrophin signaling pathway	LOC100156321	PREDICTED: Sus scrofa similar to SHC-transforming protein 1 (SH2 domain protein C1) (Src homology 2 domain-containing-transforming protein C1), transcript variant 2 (LOC100156321), mRNA	NM_003029.4	6464	SHC1	SHC (Src homology 2 domain containing) transforming protein 1	1.26906e-05	3.53395e-05	7.99893
4722	Neurotrophin signaling pathway	YWHAZ	PREDICTED: Sus scrofa tyrosine 3-monooxygenase/tryptophan 5-monooxygenase activation protein, zeta polypeptide (YWHAZ), mRNA	NM_145690.2	7534	YWHAZ	tyrosine 3-monooxygenase/tryptophan 5-monooxygenase activation protein, zeta polypeptide	1.26906e-05	3.53395e-05	7.99893
4722	Neurotrophin signaling pathway	LOC100154056	PREDICTED: Sus scrofa similar to calmodulin (LOC100154056), mRNA	NM_006888.4	801	CALM1	calmodulin 1 (phosphorylase kinase, delta)	1.26906e-05	3.53395e-05	7.99893
4722	Neurotrophin signaling pathway	LOC100155504	PREDICTED: Sus scrofa similar to 14-3-3 protein eta (LOC100155504), mRNA	BC003047.1	7533	YWHAH	tyrosine 3-monooxygenase/tryptophan 5-monooxygenase activation protein, eta polypeptide	1.26906e-05	3.53395e-05	7.99893
4722	Neurotrophin signaling pathway	CRK	Sus scrofa v-crk sarcoma virus CT10 oncogene homolog (avian) (CRK), mRNA	BC001718.1	1398	CRK	v-crk sarcoma virus CT10 oncogene homolog (avian)	1.26906e-05	3.53395e-05	7.99893
4110	Cell cycle	CDK4	Sus scrofa cyclin-dependent kinase 4 (CDK4), mRNA	BC010153.2	1019	CDK4	cyclin-dependent kinase 4	5.31763e-05	0.000138824	7.89257
4110	Cell cycle	LOC100156170	PREDICTED: Sus scrofa similar to histone deacetylase 2 (LOC100156170), mRNA	BC148797.1	3066	HDAC2	histone deacetylase 2	5.31763e-05	0.000138824	7.89257
4110	Cell cycle	YWHAZ	PREDICTED: Sus scrofa tyrosine 3-monooxygenase/tryptophan 5-monooxygenase activation protein, zeta polypeptide (YWHAZ), mRNA	NM_145690.2	7534	YWHAZ	tyrosine 3-monooxygenase/tryptophan 5-monooxygenase activation protein, zeta polypeptide	5.31763e-05	0.000138824	7.89257
4110	Cell cycle	LOC100156053	PREDICTED: Sus scrofa similar to BUB3 budding uninhibited by benzimidazoles 3, transcript variant 1 (LOC100156053), mRNA	NM_004725.3	9184	BUB3	budding uninhibited by benzimidazoles 3 homolog (yeast)	5.31763e-05	0.000138824	7.89257
4110	Cell cycle	LOC100155504	PREDICTED: Sus scrofa similar to 14-3-3 protein eta (LOC100155504), mRNA	BC003047.1	7533	YWHAH	tyrosine 3-monooxygenase/tryptophan 5-monooxygenase activation protein, eta polypeptide	5.31763e-05	0.000138824	7.89257
4110	Cell cycle	LOC100153297	PREDICTED: Sus scrofa similar to Origin recognition complex, subunit 4-like (yeast) (LOC100153297), mRNA	AK291989.1	5000	ORC4L	origin recognition complex, subunit 4-like (yeast)	5.31763e-05	0.000138824	7.89257
4110	Cell cycle	SMAD4	Sus scrofa SMAD family member 4 (SMAD4), mRNA	NM_005359.5	4089	SMAD4	SMAD family member 4	5.31763e-05	0.000138824	7.89257
5222	Small cell lung cancer	NFKB1	Sus scrofa nuclear factor of kappa light polypeptide gene enhancer in B-cells 1 (NFKB1), mRNA	NM_003998.3	4790	NFKB1	nuclear factor of kappa light polypeptide gene enhancer in B-cells 1	0.000144297	0.000339205	8.36731
5222	Small cell lung cancer	RELA	Sus scrofa v-rel reticuloendotheliosis viral oncogene homolog A (avian) (RELA), mRNA	NM_021975.3	5970	RELA	v-rel reticuloendotheliosis viral oncogene homolog A (avian)	0.000144297	0.000339205	8.36731
5222	Small cell lung cancer	CDK4	Sus scrofa cyclin-dependent kinase 4 (CDK4), mRNA	BC010153.2	1019	CDK4	cyclin-dependent kinase 4	0.000144297	0.000339205	8.36731
5222	Small cell lung cancer	ITGB1	Sus scrofa integrin, beta 1 (fibronectin receptor, beta polypeptide, antigen CD29 includes MDF2, MSK12) (ITGB1), mRNA	BC020057.1	3688	ITGB1	integrin, beta 1 (fibronectin receptor, beta polypeptide, antigen CD29 includes MDF2, MSK12)	0.000144297	0.000339205	8.36731
5222	Small cell lung cancer	GPIIB	Sus scrofa glycoprotein IIb (GPIIB), mRNA	BC126442.1	3674	ITGA2B	integrin, alpha 2b (platelet glycoprotein IIb of IIb/IIIa complex, antigen CD41)	0.000144297	0.000339205	8.36731
5222	Small cell lung cancer	PTEN	PREDICTED: Sus scrofa similar to MMAC1 (LOC100156264), mRNA					0.000144297	0.000339205	8.36731
4330	Notch signaling pathway	LOC100154978	Sus scrofa mRNA, clone:OVRM10005H07, expressed in ovary	NM_016022.2	51107	APH1A	anterior pharynx defective 1 homolog A (C. elegans)	0.000156196	0.000362466	16.3055
4330	Notch signaling pathway	LOC100156170	PREDICTED: Sus scrofa similar to histone deacetylase 2 (LOC100156170), mRNA	BC148797.1	3066	HDAC2	histone deacetylase 2	0.000156196	0.000362466	16.3055
4330	Notch signaling pathway	LOC100156098	PREDICTED: Sus scrofa similar to Nicastrin (LOC100156098), mRNA	NM_015331.2	23385	NCSTN	nicastrin	0.000156196	0.000362466	16.3055
4330	Notch signaling pathway	LOC100154978	PREDICTED: Sus scrofa similar to anterior pharynx defective 1a homolog (C. elegans) (LOC100154978), mRNA	NM_001077628.1	51107	APH1A	anterior pharynx defective 1 homolog A (C. elegans)	0.000156196	0.000362466	16.3055
4330	Notch signaling pathway	LOC100153369	PREDICTED: Sus scrofa similar to Neurogenic locus notch homolog protein 2 precursor (Notch 2) (hN2) (LOC100153369), partial mRNA	NM_024408.2	4853	NOTCH2	Notch homolog 2 (Drosophila)	0.000156196	0.000362466	16.3055
4350	TGF-beta signaling pathway	BMP4	Sus scrofa bone morphogenetic protein 4 (BMP4), mRNA	BX161385.1	652	BMP4	bone morphogenetic protein 4	0.000224066	0.000492595	7.75506
4350	TGF-beta signaling pathway	THBS1	PREDICTED: Sus scrofa thrombospondin 1 (THBS1), mRNA	BC136470.1	7057	THBS1	thrombospondin 1	0.000224066	0.000492595	7.75506
4350	TGF-beta signaling pathway	LOC100152307	PREDICTED: Sus scrofa similar to activin A type I receptor (LOC100152307), mRNA	NM_001111067.2	90	ACVR1	activin A receptor, type I	0.000224066	0.000492595	7.75506
4350	TGF-beta signaling pathway	PPP2R1A	Sus scrofa protein phosphatase 2 (formerly 2A), regulatory subunit A, alpha isoform (PPP2R1A), mRNA	NM_014225.4	5518	PPP2R1A	protein phosphatase 2 (formerly 2A), regulatory subunit A, alpha isoform	0.000224066	0.000492595	7.75506
4350	TGF-beta signaling pathway	SMAD4	Sus scrofa SMAD family member 4 (SMAD4), mRNA	NM_005359.5	4089	SMAD4	SMAD family member 4	0.000224066	0.000492595	7.75506
4350	TGF-beta signaling pathway	ID2	Sus scrofa inhibitor of DNA binding 2 (ID2), mRNA	BC030639.2	3398	ID2	inhibitor of DNA binding 2, dominant negative helix-loop-helix protein	0.000224066	0.000492595	7.75506
531	Glycosaminoglycan degradation	GUSB	Sus scrofa glucuronidase, beta (GUSB), mRNA	NM_000181.3	2990	GUSB	glucuronidase, beta	0.000441444	0.000921963	22.7113
531	Glycosaminoglycan degradation	HEXB	Sus scrofa hexosaminidase B (beta polypeptide) (HEXB), mRNA	NM_000521.3	3074	HEXB	hexosaminidase B (beta polypeptide)	0.000441444	0.000921963	22.7113
531	Glycosaminoglycan degradation	HYAL2	Sus scrofa hyaluronoglucosaminidase 2 (HYAL2), mRNA	BC000692.2	8692	HYAL2	hyaluronoglucosaminidase 2	0.000441444	0.000921963	22.7113
4142	Lysosome	CLTC	Sus scrofa mRNA, clone:ITT010086F03, expressed in intestine	NM_004859.3	1213	CLTC	clathrin, heavy chain (Hc)	0.000686433	0.00136536	6.35915
4142	Lysosome	GUSB	Sus scrofa glucuronidase, beta (GUSB), mRNA	NM_000181.3	2990	GUSB	glucuronidase, beta	0.000686433	0.00136536	6.35915
4142	Lysosome	LOC100152208	PREDICTED: Sus scrofa similar to CLN5 (LOC100152208), mRNA	NM_006493.2	1203	CLN5	ceroid-lipofuscinosis, neuronal 5	0.000686433	0.00136536	6.35915
4142	Lysosome	LOC100154598	PREDICTED: Sus scrofa similar to lysosomal-associated membrane protein 2, transcript variant 1 (LOC100154598), mRNA	NM_002294.2	3920	LAMP2	lysosomal-associated membrane protein 2	0.000686433	0.00136536	6.35915
4142	Lysosome	LOC100154598	PREDICTED: Sus scrofa similar to lysosomal-associated membrane protein 2, transcript variant 2 (LOC100154598), mRNA	NM_013995.2	3920	LAMP2	lysosomal-associated membrane protein 2	0.000686433	0.00136536	6.35915
4142	Lysosome	HEXB	Sus scrofa hexosaminidase B (beta polypeptide) (HEXB), mRNA	NM_000521.3	3074	HEXB	hexosaminidase B (beta polypeptide)	0.000686433	0.00136536	6.35915
4142	Lysosome	ATP6V1H	Sus scrofa ATPase, H+ transporting, lysosomal 50/57kDa, V1 subunit H (ATP6V1H), mRNA	NM_015941.2	51606	ATP6V1H	ATPase, H+ transporting, lysosomal 50/57kDa, V1 subunit H	0.000686433	0.00136536	6.35915
4070	Phosphatidylinositol signaling system	LOC100154056	PREDICTED: Sus scrofa similar to calmodulin (LOC100154056), mRNA	NM_006888.4	801	CALM1	calmodulin 1 (phosphorylase kinase, delta)	0.00116004	0.00216633	10.0939
4070	Phosphatidylinositol signaling system	LOC100157143	PREDICTED: Sus scrofa similar to Phosphatidylinositol 4-kinase alpha (PI4-kinase alpha) (PtdIns-4-kinase alpha) (PI4K-alpha) (LOC100157143), mRNA	AK302424.1	5297	PI4KA	phosphatidylinositol 4-kinase, catalytic, alpha	0.00116004	0.00216633	10.0939
4070	Phosphatidylinositol signaling system	PIK3C3	Sus scrofa phosphoinositide-3-kinase, class 3 (PIK3C3), mRNA	BC053651.1	5289	PIK3C3	phosphoinositide-3-kinase, class 3	0.00116004	0.00216633	10.0939
4070	Phosphatidylinositol signaling system	PTEN	PREDICTED: Sus scrofa similar to MMAC1 (LOC100156264), mRNA					0.00116004	0.00216633	10.0939
5010	Alzheimer's disease	LOC100154978	Sus scrofa mRNA, clone:OVRM10005H07, expressed in ovary	NM_016022.2	51107	APH1A	anterior pharynx defective 1 homolog A (C. elegans)	0.00169792	0.00296496	4.57964
5010	Alzheimer's disease	SDHD	Sus scrofa succinate dehydrogenase complex, subunit D, integral membrane protein (SDHD), nuclear gene encoding mitochondrial protein, mRNA	BC012603.1	6392	SDHD	succinate dehydrogenase complex, subunit D, integral membrane protein	0.00169792	0.00296496	4.57964
5010	Alzheimer's disease	SERCA2	Pig mRNA for endoplasmic-reticulum Ca(2+)-transport ATPase (class 1)	NM_001681.3	488	ATP2A2	ATPase, Ca++ transporting, cardiac muscle, slow twitch 2	0.00169792	0.00296496	4.57964
5010	Alzheimer's disease	SERCA2	Pig mRNA for endoplasmic-reticulum Ca(2+)-transport ATPase (class 3 non-muscle transcript)	NM_001135765.1	488	ATP2A2	ATPase, Ca++ transporting, cardiac muscle, slow twitch 2	0.00169792	0.00296496	4.57964
5010	Alzheimer's disease	LOC100156098	PREDICTED: Sus scrofa similar to Nicastrin (LOC100156098), mRNA	NM_015331.2	23385	NCSTN	nicastrin	0.00169792	0.00296496	4.57964
5010	Alzheimer's disease	LOC100154978	PREDICTED: Sus scrofa similar to anterior pharynx defective 1a homolog (C. elegans) (LOC100154978), mRNA	NM_001077628.1	51107	APH1A	anterior pharynx defective 1 homolog A (C. elegans)	0.00169792	0.00296496	4.57964
5010	Alzheimer's disease	LOC100154056	PREDICTED: Sus scrofa similar to calmodulin (LOC100154056), mRNA	NM_006888.4	801	CALM1	calmodulin 1 (phosphorylase kinase, delta)	0.00169792	0.00296496	4.57964
5010	Alzheimer's disease	LOC100152232	PREDICTED: Sus scrofa similar to cytochrome c oxidase subunit VIa polypeptide 1 (LOC100152232), mRNA	NG_004806.3	285849	COX6A1P2	cytochrome c oxidase subunit VIa polypeptide 1 pseudogene 2	0.00169792	0.00296496	4.57964
5010	Alzheimer's disease	APP	Sus scrofa amyloid beta (A4) precursor protein (APP), mRNA	NM_000484.3	351	APP	amyloid beta (A4) precursor protein	0.00169792	0.00296496	4.57964
4530	Tight junction	CDK4	Sus scrofa cyclin-dependent kinase 4 (CDK4), mRNA	BC010153.2	1019	CDK4	cyclin-dependent kinase 4	0.00223807	0.00366897	6.30868
4530	Tight junction	LOC100153223	PREDICTED: Sus scrofa similar to membrane associated guanylate kinase, WW and PDZ domain containing 3 (LOC100153223), mRNA	NM_001142782.1	260425	MAGI3	membrane associated guanylate kinase, WW and PDZ domain containing 3	0.00223807	0.00366897	6.30868
4530	Tight junction	LOC100154503	PREDICTED: Sus scrofa similar to v-src sarcoma (Schmidt-Ruppin A-2) viral oncogene homolog (LOC100154503), mRNA	BC051270.1	6714	SRC	v-src sarcoma (Schmidt-Ruppin A-2) viral oncogene homolog (avian)	0.00223807	0.00366897	6.30868
4530	Tight junction	PPP2R1A	Sus scrofa protein phosphatase 2 (formerly 2A), regulatory subunit A, alpha isoform (PPP2R1A), mRNA	NM_014225.4	5518	PPP2R1A	protein phosphatase 2 (formerly 2A), regulatory subunit A, alpha isoform	0.00223807	0.00366897	6.30868
4530	Tight junction	PTEN	PREDICTED: Sus scrofa similar to MMAC1 (LOC100156264), mRNA					0.00223807	0.00366897	6.30868
500	Starch and sucrose metabolism	GUSB	Sus scrofa glucuronidase, beta (GUSB), mRNA	NM_000181.3	2990	GUSB	glucuronidase, beta	0.00258622	0.00407881	13.2482
500	Starch and sucrose metabolism	ENPP1	PREDICTED: Sus scrofa ectonucleotide pyrophosphatase/phosphodiesterase 1 (ENPP1), mRNA	NM_006208.2	5167	ENPP1	ectonucleotide pyrophosphatase/phosphodiesterase 1	0.00258622	0.00407881	13.2482
500	Starch and sucrose metabolism	GPI	Sus scrofa glucose phosphate isomerase (GPI), mRNA	NM_000175.2	2821	GPI	glucose phosphate isomerase	0.00258622	0.00407881	13.2482
4610	Complement and coagulation cascades	SERPING1	Sus scrofa mRNA, clone:LVRM10181E02, expressed in liver	AK303840.1	710	SERPING1	serpin peptidase inhibitor, clade G (C1 inhibitor), member 1	0.00277055	0.00428345	6.02193
4610	Complement and coagulation cascades	FH	Sus scrofa fumarate hydratase (FH), nuclear gene encoding mitochondrial protein, mRNA	BC142699.1	3075	CFH	complement factor H	0.00277055	0.00428345	6.02193
4610	Complement and coagulation cascades	SERPING1	Sus scrofa serpin peptidase inhibitor, clade G (C1 inhibitor), member 1 (SERPING1), mRNA	AK303840.1	710	SERPING1	serpin peptidase inhibitor, clade G (C1 inhibitor), member 1	0.00277055	0.00428345	6.02193
4610	Complement and coagulation cascades	PLAT	Sus scrofa plasminogen activator, tissue (PLAT), mRNA	AK289387.1	5327	PLAT	plasminogen activator, tissue	0.00277055	0.00428345	6.02193
4610	Complement and coagulation cascades	CD55	Sus scrofa CD55 molecule, decay accelerating factor for complement (Cromer blood group) (CD55), mRNA	NG_007465.1	1604	CD55	CD55 molecule, decay accelerating factor for complement (Cromer blood group)	0.00277055	0.00428345	6.02193
4610	Complement and coagulation cascades	SERPINA1	Sus scrofa serpin peptidase inhibitor, clade A (alpha-1 antiproteinase, antitrypsin), member 1 (SERPINA1), mRNA	NM_001127707.1	5265	SERPINA1	serpin peptidase inhibitor, clade A (alpha-1 antiproteinase, antitrypsin), member 1	0.00277055	0.00428345	6.02193
4360	Axon guidance	EFNA1	Sus scrofa ephrin-A1 (EFNA1), mRNA	NM_004428.2	1942	EFNA1	ephrin-A1	0.00306926	0.00459848	5.8881
4360	Axon guidance	LOC100157504	PREDICTED: Sus scrofa similar to semaphorin 6D (LOC100157504), mRNA	NM_153618.1	80031	SEMA6D	sema domain, transmembrane domain (TM), and cytoplasmic domain, (semaphorin) 6D	0.00306926	0.00459848	5.8881
4360	Axon guidance	LOC100154469	PREDICTED: Sus scrofa similar to cytoplasmic nuclear factor of activated T-cells 4 (LOC100154469), mRNA	BC008857.2	4776	NFATC4	nuclear factor of activated T-cells, cytoplasmic, calcineurin-dependent 4	0.00306926	0.00459848	5.8881
4360	Axon guidance	EPHA4	Sus scrofa EPH receptor A4 (EPHA4), mRNA	NM_004438.3	2043	EPHA4	EPH receptor A4	0.00306926	0.00459848	5.8881
4360	Axon guidance	ITGB1	Sus scrofa integrin, beta 1 (fibronectin receptor, beta polypeptide, antigen CD29 includes MDF2, MSK12) (ITGB1), mRNA	BC020057.1	3688	ITGB1	integrin, beta 1 (fibronectin receptor, beta polypeptide, antigen CD29 includes MDF2, MSK12)	0.00306926	0.00459848	5.8881
4360	Axon guidance	EFNA1	BW979660 full-length enriched swine cDNA library, adult intestine Sus scrofa cDNA clone ITT010041A11 5', mRNA sequence					0.00306926	0.00459848	5.8881
5214	Glioma	CDK4	Sus scrofa cyclin-dependent kinase 4 (CDK4), mRNA	BC010153.2	1019	CDK4	cyclin-dependent kinase 4	0.00311094	0.0046409	7.85081
5214	Glioma	LOC100156321	PREDICTED: Sus scrofa similar to SHC-transforming protein 1 (SH2 domain protein C1) (Src homology 2 domain-containing-transforming protein C1), transcript variant 2 (LOC100156321), mRNA	NM_003029.4	6464	SHC1	SHC (Src homology 2 domain containing) transforming protein 1	0.00311094	0.0046409	7.85081
5214	Glioma	LOC100154056	PREDICTED: Sus scrofa similar to calmodulin (LOC100154056), mRNA	NM_006888.4	801	CALM1	calmodulin 1 (phosphorylase kinase, delta)	0.00311094	0.0046409	7.85081
5214	Glioma	PTEN	PREDICTED: Sus scrofa similar to MMAC1 (LOC100156264), mRNA					0.00311094	0.0046409	7.85081
5215	Prostate cancer	NFKB1	Sus scrofa nuclear factor of kappa light polypeptide gene enhancer in B-cells 1 (NFKB1), mRNA	NM_003998.3	4790	NFKB1	nuclear factor of kappa light polypeptide gene enhancer in B-cells 1	0.00410764	0.00572123	5.5201
5215	Prostate cancer	RELA	Sus scrofa v-rel reticuloendotheliosis viral oncogene homolog A (avian) (RELA), mRNA	NM_021975.3	5970	RELA	v-rel reticuloendotheliosis viral oncogene homolog A (avian)	0.00410764	0.00572123	5.5201
5215	Prostate cancer	ATF4	Sus scrofa activating transcription factor 4 (tax-responsive enhancer element B67) (ATF4), mRNA	BC073990.1	468	ATF4	activating transcription factor 4 (tax-responsive enhancer element B67)	0.00410764	0.00572123	5.5201
5215	Prostate cancer	HSP90	Sus scrofa 90-kDa heat shock protein (HSP90), mRNA	NM_005348.3	3320	HSP90AA1	heat shock protein 90kDa alpha (cytosolic), class A member 1	0.00410764	0.00572123	5.5201
5215	Prostate cancer	PTEN	PREDICTED: Sus scrofa similar to MMAC1 (LOC100156264), mRNA					0.00410764	0.00572123	5.5201
5016	Huntington's disease	CLTC	Sus scrofa mRNA, clone:ITT010086F03, expressed in intestine	NM_004859.3	1213	CLTC	clathrin, heavy chain (Hc)	0.00412979	0.00574361	4.54225
5016	Huntington's disease	SDHD	Sus scrofa succinate dehydrogenase complex, subunit D, integral membrane protein (SDHD), nuclear gene encoding mitochondrial protein, mRNA	BC012603.1	6392	SDHD	succinate dehydrogenase complex, subunit D, integral membrane protein	0.00412979	0.00574361	4.54225
5016	Huntington's disease	LOC100156170	PREDICTED: Sus scrofa similar to histone deacetylase 2 (LOC100156170), mRNA	BC148797.1	3066	HDAC2	histone deacetylase 2	0.00412979	0.00574361	4.54225
5016	Huntington's disease	LOC100152232	PREDICTED: Sus scrofa similar to cytochrome c oxidase subunit VIa polypeptide 1 (LOC100152232), mRNA	NG_004806.3	285849	COX6A1P2	cytochrome c oxidase subunit VIa polypeptide 1 pseudogene 2	0.00412979	0.00574361	4.54225
5016	Huntington's disease	LOC100158185	PREDICTED: Sus scrofa similar to adenine nucleotide translocator 2 (LOC100158185), mRNA	NM_001152.4	292	SLC25A5	solute carrier family 25 (mitochondrial carrier; adenine nucleotide translocator), member 5	0.00412979	0.00574361	4.54225
5016	Huntington's disease	VDAC5P	Sus scrofa voltage-dependent anion channel 5, pseudogene (VDAC5P), mRNA	NM_005662.5	7419	VDAC3	voltage-dependent anion channel 3	0.00412979	0.00574361	4.54225
4910	Insulin signaling pathway	LOC100156321	PREDICTED: Sus scrofa similar to SHC-transforming protein 1 (SH2 domain protein C1) (Src homology 2 domain-containing-transforming protein C1), transcript variant 2 (LOC100156321), mRNA	NM_003029.4	6464	SHC1	SHC (Src homology 2 domain containing) transforming protein 1	0.00492893	0.00650929	5.29929
4910	Insulin signaling pathway	LOC100154056	PREDICTED: Sus scrofa similar to calmodulin (LOC100154056), mRNA	NM_006888.4	801	CALM1	calmodulin 1 (phosphorylase kinase, delta)	0.00492893	0.00650929	5.29929
4910	Insulin signaling pathway	PPP1R3C	PREDICTED: Sus scrofa protein phosphatase 1, regulatory (inhibitor) subunit 3C (PPP1R3C), mRNA	BC012625.1	5507	PPP1R3C	protein phosphatase 1, regulatory (inhibitor) subunit 3C	0.00492893	0.00650929	5.29929
4910	Insulin signaling pathway	CRK	Sus scrofa v-crk sarcoma virus CT10 oncogene homolog (avian) (CRK), mRNA	BC001718.1	1398	CRK	v-crk sarcoma virus CT10 oncogene homolog (avian)	0.00492893	0.00650929	5.29929
4910	Insulin signaling pathway	LOC733612	AJ952110 KN404_1 Sus scrofa cDNA clone C0007745h04 3', mRNA sequence					0.00492893	0.00650929	5.29929
4020	Calcium signaling pathway	SERCA2	Pig mRNA for endoplasmic-reticulum Ca(2+)-transport ATPase (class 1)	NM_001681.3	488	ATP2A2	ATPase, Ca++ transporting, cardiac muscle, slow twitch 2	0.00511471	0.00667635	4.35558
4020	Calcium signaling pathway	SERCA2	Pig mRNA for endoplasmic-reticulum Ca(2+)-transport ATPase (class 3 non-muscle transcript)	NM_001135765.1	488	ATP2A2	ATPase, Ca++ transporting, cardiac muscle, slow twitch 2	0.00511471	0.00667635	4.35558
4020	Calcium signaling pathway	LOC100154056	PREDICTED: Sus scrofa similar to calmodulin (LOC100154056), mRNA	NM_006888.4	801	CALM1	calmodulin 1 (phosphorylase kinase, delta)	0.00511471	0.00667635	4.35558
4020	Calcium signaling pathway	LOC100158185	PREDICTED: Sus scrofa similar to adenine nucleotide translocator 2 (LOC100158185), mRNA	NM_001152.4	292	SLC25A5	solute carrier family 25 (mitochondrial carrier; adenine nucleotide translocator), member 5	0.00511471	0.00667635	4.35558
4020	Calcium signaling pathway	EDNRA	Sus scrofa endothelin receptor type A (EDNRA), mRNA	NM_001957.3	1909	EDNRA	endothelin receptor type A	0.00511471	0.00667635	4.35558
4020	Calcium signaling pathway	PORGSA1	Sus scrofa alpha-stimulatory subunit of GTP-binding protein (PORGSA1), mRNA	BC108315.1	2778	GNAS	GNAS complex locus	0.00511471	0.00667635	4.35558
4020	Calcium signaling pathway	VDAC5P	Sus scrofa voltage-dependent anion channel 5, pseudogene (VDAC5P), mRNA	NM_005662.5	7419	VDAC3	voltage-dependent anion channel 3	0.00511471	0.00667635	4.35558
4144	Endocytosis	KIT	Sus scrofa v-kit Hardy-Zuckerman 4 feline sarcoma viral oncogene homolog (KIT), mRNA	NM_001093772.1	3815	KIT	v-kit Hardy-Zuckerman 4 feline sarcoma viral oncogene homolog	0.00626624	0.00785009	4.18365
4144	Endocytosis	CLTC	Sus scrofa mRNA, clone:ITT010086F03, expressed in intestine	NM_004859.3	1213	CLTC	clathrin, heavy chain (Hc)	0.00626624	0.00785009	4.18365
4144	Endocytosis	CR956404.1	Sus scrofa RAB22A, member RAS oncogene family (RAB22A), mRNA	NM_020673.2	57403	RAB22A	RAB22A, member RAS oncogene family	0.00626624	0.00785009	4.18365
4144	Endocytosis	LOC100153066	PREDICTED: Sus scrofa similar to differentiation enhancing factor 1 (LOC100153066), mRNA	BC144493.1	50807	ASAP1	ArfGAP with SH3 domain, ankyrin repeat and PH domain 1	0.00626624	0.00785009	4.18365
4144	Endocytosis	LOC100152582	PREDICTED: Sus scrofa similar to PH and SEC7 domain-containing protein 1 (Pleckstrin homology and SEC7 domain-containing protein 1) (Exchange factor for ARF6) (LOC100152582), mRNA	NM_002779.3	5662	PSD	pleckstrin and Sec7 domain containing	0.00626624	0.00785009	4.18365
4144	Endocytosis	LOC100154503	PREDICTED: Sus scrofa similar to v-src sarcoma (Schmidt-Ruppin A-2) viral oncogene homolog (LOC100154503), mRNA	BC051270.1	6714	SRC	v-src sarcoma (Schmidt-Ruppin A-2) viral oncogene homolog (avian)	0.00626624	0.00785009	4.18365
270	Cysteine and methionine metabolism	LOC100155326	PREDICTED: Sus scrofa similar to PRDX3 protein (LOC100155326), mRNA	NM_002451.3	4507	MTAP	methylthioadenosine phosphorylase	0.00745302	0.0089648	9.3517
270	Cysteine and methionine metabolism	GOT2	Sus scrofa glutamic-oxaloacetic transaminase 2, mitochondrial (aspartate aminotransferase 2) (GOT2), nuclear gene encoding mitochondrial protein, mRNA	NM_002080.2	2806	GOT2	glutamic-oxaloacetic transaminase 2, mitochondrial (aspartate aminotransferase 2)	0.00745302	0.0089648	9.3517
270	Cysteine and methionine metabolism	DNMT1	Sus scrofa DNA (cytosine-5-)-methyltransferase 1 (DNMT1), mRNA	NM_001379.2	1786	DNMT1	DNA (cytosine-5-)-methyltransferase 1	0.00745302	0.0089648	9.3517
4062	Chemokine signaling pathway	NFKB1	Sus scrofa nuclear factor of kappa light polypeptide gene enhancer in B-cells 1 (NFKB1), mRNA	NM_003998.3	4790	NFKB1	nuclear factor of kappa light polypeptide gene enhancer in B-cells 1	0.00808938	0.00952669	3.97447
4062	Chemokine signaling pathway	CXCL12	Sus scrofa mRNA, clone:UTR010035C06, expressed in uterus	NM_199168.2	6387	CXCL12	chemokine (C-X-C motif) ligand 12 (stromal cell-derived factor 1)	0.00808938	0.00952669	3.97447
4062	Chemokine signaling pathway	RELA	Sus scrofa v-rel reticuloendotheliosis viral oncogene homolog A (avian) (RELA), mRNA	NM_021975.3	5970	RELA	v-rel reticuloendotheliosis viral oncogene homolog A (avian)	0.00808938	0.00952669	3.97447
4062	Chemokine signaling pathway	LOC100156321	PREDICTED: Sus scrofa similar to SHC-transforming protein 1 (SH2 domain protein C1) (Src homology 2 domain-containing-transforming protein C1), transcript variant 2 (LOC100156321), mRNA	NM_003029.4	6464	SHC1	SHC (Src homology 2 domain containing) transforming protein 1	0.00808938	0.00952669	3.97447
4062	Chemokine signaling pathway	CRK	Sus scrofa v-crk sarcoma virus CT10 oncogene homolog (avian) (CRK), mRNA	BC001718.1	1398	CRK	v-crk sarcoma virus CT10 oncogene homolog (avian)	0.00808938	0.00952669	3.97447
4062	Chemokine signaling pathway	STAT2	Sus scrofa signal transducer and activator of transcription 2 (STAT2), mRNA	BC051284.1	6773	STAT2	signal transducer and activator of transcription 2, 113kDa	0.00808938	0.00952669	3.97447
510	N-Glycan biosynthesis	FUT8	Sus scrofa mRNA, clone:AMP010005H10, expressed in alveolar macrophage	NM_178154.1	2530	FUT8	fucosyltransferase 8 (alpha (1,6) fucosyltransferase)	0.00881957	0.0101431	8.83216
510	N-Glycan biosynthesis	GANAB	Sus scrofa glucosidase II (G2AN), mRNA	NM_198334.1	23193	GANAB	glucosidase, alpha; neutral AB	0.00881957	0.0101431	8.83216
510	N-Glycan biosynthesis	MAN1A	Sus scrofa Man9-mannosidase (MAN1A), mRNA	NM_005907.2	4121	MAN1A1	mannosidase, alpha, class 1A, member 1	0.00881957	0.0101431	8.83216
100	Steroid biosynthesis	SQLE	Sus scrofa squalene epoxidase (SQLE), mRNA	AK225085.1	6713	SQLE	squalene epoxidase	0.0101354	0.011184	17.6643
100	Steroid biosynthesis	CYP51	Sus scrofa cytochrome P450 51 (CYP51), mRNA	NM_000786.3	1595	CYP51A1	cytochrome P450, family 51, subfamily A, polypeptide 1	0.0101354	0.011184	17.6643
4662	B cell receptor signaling pathway	NFKB1	Sus scrofa nuclear factor of kappa light polypeptide gene enhancer in B-cells 1 (NFKB1), mRNA	NM_003998.3	4790	NFKB1	nuclear factor of kappa light polypeptide gene enhancer in B-cells 1	0.0111183	0.0119081	5.5782
5212	Pancreatic cancer	NFKB1	Sus scrofa nuclear factor of kappa light polypeptide gene enhancer in B-cells 1 (NFKB1), mRNA	NM_003998.3	4790	NFKB1	nuclear factor of kappa light polypeptide gene enhancer in B-cells 1	0.0111183	0.0119081	5.5782
4662	B cell receptor signaling pathway	CD81	Sus scrofa CD81 molecule (CD81), mRNA	NM_004356.3	975	CD81	CD81 molecule	0.0111183	0.0119081	5.5782
5212	Pancreatic cancer	RELA	Sus scrofa v-rel reticuloendotheliosis viral oncogene homolog A (avian) (RELA), mRNA	NM_021975.3	5970	RELA	v-rel reticuloendotheliosis viral oncogene homolog A (avian)	0.0111183	0.0119081	5.5782
4662	B cell receptor signaling pathway	RELA	Sus scrofa v-rel reticuloendotheliosis viral oncogene homolog A (avian) (RELA), mRNA	NM_021975.3	5970	RELA	v-rel reticuloendotheliosis viral oncogene homolog A (avian)	0.0111183	0.0119081	5.5782
5212	Pancreatic cancer	CDK4	Sus scrofa cyclin-dependent kinase 4 (CDK4), mRNA	BC010153.2	1019	CDK4	cyclin-dependent kinase 4	0.0111183	0.0119081	5.5782
4662	B cell receptor signaling pathway	LOC100154469	PREDICTED: Sus scrofa similar to cytoplasmic nuclear factor of activated T-cells 4 (LOC100154469), mRNA	BC008857.2	4776	NFATC4	nuclear factor of activated T-cells, cytoplasmic, calcineurin-dependent 4	0.0111183	0.0119081	5.5782
5212	Pancreatic cancer	SMAD4	Sus scrofa SMAD family member 4 (SMAD4), mRNA	NM_005359.5	4089	SMAD4	SMAD family member 4	0.0111183	0.0119081	5.5782
5012	Parkinson's disease	SDHD	Sus scrofa succinate dehydrogenase complex, subunit D, integral membrane protein (SDHD), nuclear gene encoding mitochondrial protein, mRNA	BC012603.1	6392	SDHD	succinate dehydrogenase complex, subunit D, integral membrane protein	0.0125279	0.0130824	4.27362
5012	Parkinson's disease	LOC100152232	PREDICTED: Sus scrofa similar to cytochrome c oxidase subunit VIa polypeptide 1 (LOC100152232), mRNA	NG_004806.3	285849	COX6A1P2	cytochrome c oxidase subunit VIa polypeptide 1 pseudogene 2	0.0125279	0.0130824	4.27362
5012	Parkinson's disease	LOC100158185	PREDICTED: Sus scrofa similar to adenine nucleotide translocator 2 (LOC100158185), mRNA	NM_001152.4	292	SLC25A5	solute carrier family 25 (mitochondrial carrier; adenine nucleotide translocator), member 5	0.0125279	0.0130824	4.27362
5012	Parkinson's disease	VDAC5P	Sus scrofa voltage-dependent anion channel 5, pseudogene (VDAC5P), mRNA	NM_005662.5	7419	VDAC3	voltage-dependent anion channel 3	0.0125279	0.0130824	4.27362
5012	Parkinson's disease	UCHL1	Sus scrofa ubiquitin carboxyl-terminal esterase L1 (ubiquitin thiolesterase) (UCHL1), mRNA	NM_004181.4	7345	UCHL1	ubiquitin carboxyl-terminal esterase L1 (ubiquitin thiolesterase)	0.0125279	0.0130824	4.27362
562	Inositol phosphate metabolism	LOC100157143	PREDICTED: Sus scrofa similar to Phosphatidylinositol 4-kinase alpha (PI4-kinase alpha) (PtdIns-4-kinase alpha) (PI4K-alpha) (LOC100157143), mRNA	AK302424.1	5297	PI4KA	phosphatidylinositol 4-kinase, catalytic, alpha	0.0157425	0.0156848	7.22631
562	Inositol phosphate metabolism	PIK3C3	Sus scrofa phosphoinositide-3-kinase, class 3 (PIK3C3), mRNA	BC053651.1	5289	PIK3C3	phosphoinositide-3-kinase, class 3	0.0157425	0.0156848	7.22631
562	Inositol phosphate metabolism	PTEN	PREDICTED: Sus scrofa similar to MMAC1 (LOC100156264), mRNA					0.0157425	0.0156848	7.22631
4270	Vascular smooth muscle contraction	LOC100154056	PREDICTED: Sus scrofa similar to calmodulin (LOC100154056), mRNA	NM_006888.4	801	CALM1	calmodulin 1 (phosphorylase kinase, delta)	0.0158948	0.0158021	5.04695
4270	Vascular smooth muscle contraction	EDNRA	Sus scrofa endothelin receptor type A (EDNRA), mRNA	NM_001957.3	1909	EDNRA	endothelin receptor type A	0.0158948	0.0158021	5.04695
4270	Vascular smooth muscle contraction	PORGSA1	Sus scrofa alpha-stimulatory subunit of GTP-binding protein (PORGSA1), mRNA	BC108315.1	2778	GNAS	GNAS complex locus	0.0158948	0.0158021	5.04695
4270	Vascular smooth muscle contraction	LOC733612	AJ952110 KN404_1 Sus scrofa cDNA clone C0007745h04 3', mRNA sequence					0.0158948	0.0158021	5.04695
4720	Long-term potentiation	ATF4	Sus scrofa activating transcription factor 4 (tax-responsive enhancer element B67) (ATF4), mRNA	BC073990.1	468	ATF4	activating transcription factor 4 (tax-responsive enhancer element B67)	0.0201232	0.0188693	6.62412
4720	Long-term potentiation	LOC100154056	PREDICTED: Sus scrofa similar to calmodulin (LOC100154056), mRNA	NM_006888.4	801	CALM1	calmodulin 1 (phosphorylase kinase, delta)	0.0201232	0.0188693	6.62412
4720	Long-term potentiation	LOC733612	AJ952110 KN404_1 Sus scrofa cDNA clone C0007745h04 3', mRNA sequence					0.0201232	0.0188693	6.62412
4912	GnRH signaling pathway	ATF4	Sus scrofa activating transcription factor 4 (tax-responsive enhancer element B67) (ATF4), mRNA	BC073990.1	468	ATF4	activating transcription factor 4 (tax-responsive enhancer element B67)	0.0202459	0.0189531	4.71048
4912	GnRH signaling pathway	LOC100154056	PREDICTED: Sus scrofa similar to calmodulin (LOC100154056), mRNA	NM_006888.4	801	CALM1	calmodulin 1 (phosphorylase kinase, delta)	0.0202459	0.0189531	4.71048
4912	GnRH signaling pathway	LOC100154503	PREDICTED: Sus scrofa similar to v-src sarcoma (Schmidt-Ruppin A-2) viral oncogene homolog (LOC100154503), mRNA	BC051270.1	6714	SRC	v-src sarcoma (Schmidt-Ruppin A-2) viral oncogene homolog (avian)	0.0202459	0.0189531	4.71048
4912	GnRH signaling pathway	PORGSA1	Sus scrofa alpha-stimulatory subunit of GTP-binding protein (PORGSA1), mRNA	BC108315.1	2778	GNAS	GNAS complex locus	0.0202459	0.0189531	4.71048
4670	Leukocyte transendothelial migration	CXCL12	Sus scrofa mRNA, clone:UTR010035C06, expressed in uterus	NM_199168.2	6387	CXCL12	chemokine (C-X-C motif) ligand 12 (stromal cell-derived factor 1)	0.0218512	0.0200246	4.60808
4670	Leukocyte transendothelial migration	VCL	S.scrofa metavinculin cDNA	AL832130.1	7414	VCL	vinculin	0.0218512	0.0200246	4.60808
4670	Leukocyte transendothelial migration	VCL	Sus scrofa vinculin (VCL), mRNA	NM_003373.3	7414	VCL	vinculin	0.0218512	0.0200246	4.60808
4670	Leukocyte transendothelial migration	ITGB1	Sus scrofa integrin, beta 1 (fibronectin receptor, beta polypeptide, antigen CD29 includes MDF2, MSK12) (ITGB1), mRNA	BC020057.1	3688	ITGB1	integrin, beta 1 (fibronectin receptor, beta polypeptide, antigen CD29 includes MDF2, MSK12)	0.0218512	0.0200246	4.60808
4670	Leukocyte transendothelial migration	GP22-PHOX	Sus scrofa NADPH oxidase light chain subunit (GP22-PHOX), mRNA	BC006465.1	1535	CYBA	cytochrome b-245, alpha polypeptide	0.0218512	0.0200246	4.60808
5221	Acute myeloid leukemia	KIT	Sus scrofa v-kit Hardy-Zuckerman 4 feline sarcoma viral oncogene homolog (KIT), mRNA	NM_001093772.1	3815	KIT	v-kit Hardy-Zuckerman 4 feline sarcoma viral oncogene homolog	0.0225522	0.0204786	6.35915
5221	Acute myeloid leukemia	NFKB1	Sus scrofa nuclear factor of kappa light polypeptide gene enhancer in B-cells 1 (NFKB1), mRNA	NM_003998.3	4790	NFKB1	nuclear factor of kappa light polypeptide gene enhancer in B-cells 1	0.0225522	0.0204786	6.35915
5221	Acute myeloid leukemia	RELA	Sus scrofa v-rel reticuloendotheliosis viral oncogene homolog A (avian) (RELA), mRNA	NM_021975.3	5970	RELA	v-rel reticuloendotheliosis viral oncogene homolog A (avian)	0.0225522	0.0204786	6.35915
860	Porphyrin and chlorophyll metabolism	GUSB	Sus scrofa glucuronidase, beta (GUSB), mRNA	NM_000181.3	2990	GUSB	glucuronidase, beta	0.0289242	0.0246935	10.5986
860	Porphyrin and chlorophyll metabolism	HMOX1	Sus scrofa heme oxygenase (decycling) 1 (HMOX1), mRNA	CR626132.1	3162	HMOX1	heme oxygenase (decycling) 1	0.0289242	0.0246935	10.5986
4640	Hematopoietic cell lineage	KIT	Sus scrofa v-kit Hardy-Zuckerman 4 feline sarcoma viral oncogene homolog (KIT), mRNA	NM_001093772.1	3815	KIT	v-kit Hardy-Zuckerman 4 feline sarcoma viral oncogene homolog	0.0290835	0.0247924	4.23944
4310	Wnt signaling pathway	SFRP4	Sus scrofa secreted frizzled-related protein 4 (SFRP4), mRNA	NM_003014.3	6424	SFRP4	secreted frizzled-related protein 4	0.0290835	0.0247924	4.23944
4640	Hematopoietic cell lineage	LOC100155091	PREDICTED: Sus scrofa similar to integrin, alpha 5 (fibronectin receptor, alpha polypeptide) (LOC100155091), mRNA	NM_002205.2	3678	ITGA5	integrin, alpha 5 (fibronectin receptor, alpha polypeptide)	0.0290835	0.0247924	4.23944
4310	Wnt signaling pathway	LOC100154469	PREDICTED: Sus scrofa similar to cytoplasmic nuclear factor of activated T-cells 4 (LOC100154469), mRNA	BC008857.2	4776	NFATC4	nuclear factor of activated T-cells, cytoplasmic, calcineurin-dependent 4	0.0290835	0.0247924	4.23944
4640	Hematopoietic cell lineage	GPIIB	Sus scrofa glycoprotein IIb (GPIIB), mRNA	BC126442.1	3674	ITGA2B	integrin, alpha 2b (platelet glycoprotein IIb of IIb/IIIa complex, antigen CD41)	0.0290835	0.0247924	4.23944
4310	Wnt signaling pathway	PPP2R1A	Sus scrofa protein phosphatase 2 (formerly 2A), regulatory subunit A, alpha isoform (PPP2R1A), mRNA	NM_014225.4	5518	PPP2R1A	protein phosphatase 2 (formerly 2A), regulatory subunit A, alpha isoform	0.0290835	0.0247924	4.23944
4310	Wnt signaling pathway	SMAD4	Sus scrofa SMAD family member 4 (SMAD4), mRNA	NM_005359.5	4089	SMAD4	SMAD family member 4	0.0290835	0.0247924	4.23944
4640	Hematopoietic cell lineage	CD55	Sus scrofa CD55 molecule, decay accelerating factor for complement (Cromer blood group) (CD55), mRNA	NG_007465.1	1604	CD55	CD55 molecule, decay accelerating factor for complement (Cromer blood group)	0.0290835	0.0247924	4.23944
4520	Adherens junction	LOC100154503	PREDICTED: Sus scrofa similar to v-src sarcoma (Schmidt-Ruppin A-2) viral oncogene homolog (LOC100154503), mRNA	BC051270.1	6714	SRC	v-src sarcoma (Schmidt-Ruppin A-2) viral oncogene homolog (avian)	0.0338996	0.02832	5.48203
4520	Adherens junction	VCL	S.scrofa metavinculin cDNA	AL832130.1	7414	VCL	vinculin	0.0338996	0.02832	5.48203
4520	Adherens junction	VCL	Sus scrofa vinculin (VCL), mRNA	NM_003373.3	7414	VCL	vinculin	0.0338996	0.02832	5.48203
4520	Adherens junction	SMAD4	Sus scrofa SMAD family member 4 (SMAD4), mRNA	NM_005359.5	4089	SMAD4	SMAD family member 4	0.0338996	0.02832	5.48203
310	Lysine degradation	HADHA	Sus scrofa hydroxyacyl-Coenzyme A dehydrogenase/3-ketoacyl-Coenzyme A thiolase/enoyl-Coenzyme A hydratase (trifunctional protein), alpha subunit (HADHA), nuclear gene encoding mitochondrial protein, mRNA	NM_000182.4	3030	HADHA	hydroxyacyl-Coenzyme A dehydrogenase/3-ketoacyl-Coenzyme A thiolase/enoyl-Coenzyme A hydratase (trifunctional protein), alpha subunit	0.0413804	0.0335686	8.83216
310	Lysine degradation	DLST	Sus scrofa dihydrolipoamide S-succinyltransferase (E2 component of 2-oxo-glutarate complex) (DLST), mRNA	BC001922.1	1743	DLST	dihydrolipoamide S-succinyltransferase (E2 component of 2-oxo-glutarate complex)	0.0413804	0.0335686	8.83216
4660	T cell receptor signaling pathway	NFKB1	Sus scrofa nuclear factor of kappa light polypeptide gene enhancer in B-cells 1 (NFKB1), mRNA	NM_003998.3	4790	NFKB1	nuclear factor of kappa light polypeptide gene enhancer in B-cells 1	0.0591545	0.0448988	3.4189
4660	T cell receptor signaling pathway	RELA	Sus scrofa v-rel reticuloendotheliosis viral oncogene homolog A (avian) (RELA), mRNA	NM_021975.3	5970	RELA	v-rel reticuloendotheliosis viral oncogene homolog A (avian)	0.0591545	0.0448988	3.4189
4660	T cell receptor signaling pathway	CDK4	Sus scrofa cyclin-dependent kinase 4 (CDK4), mRNA	BC010153.2	1019	CDK4	cyclin-dependent kinase 4	0.0591545	0.0448988	3.4189
4660	T cell receptor signaling pathway	LOC100154469	PREDICTED: Sus scrofa similar to cytoplasmic nuclear factor of activated T-cells 4 (LOC100154469), mRNA	BC008857.2	4776	NFATC4	nuclear factor of activated T-cells, cytoplasmic, calcineurin-dependent 4	0.0591545	0.0448988	3.4189
4010	MAPK signaling pathway	NFKB1	Sus scrofa nuclear factor of kappa light polypeptide gene enhancer in B-cells 1 (NFKB1), mRNA	NM_003998.3	4790	NFKB1	nuclear factor of kappa light polypeptide gene enhancer in B-cells 1	0.0604619	0.0456749	2.88005
4010	MAPK signaling pathway	RELA	Sus scrofa v-rel reticuloendotheliosis viral oncogene homolog A (avian) (RELA), mRNA	NM_021975.3	5970	RELA	v-rel reticuloendotheliosis viral oncogene homolog A (avian)	0.0604619	0.0456749	2.88005
4010	MAPK signaling pathway	ATF4	Sus scrofa activating transcription factor 4 (tax-responsive enhancer element B67) (ATF4), mRNA	BC073990.1	468	ATF4	activating transcription factor 4 (tax-responsive enhancer element B67)	0.0604619	0.0456749	2.88005
4010	MAPK signaling pathway	LOC100153985	PREDICTED: Sus scrofa similar to protein phosphatase 1A (LOC100153985), mRNA	NM_021003.4	5494	PPM1A	protein phosphatase 1A (formerly 2C), magnesium-dependent, alpha isoform	0.0604619	0.0456749	2.88005
4010	MAPK signaling pathway	CRK	Sus scrofa v-crk sarcoma virus CT10 oncogene homolog (avian) (CRK), mRNA	BC001718.1	1398	CRK	v-crk sarcoma virus CT10 oncogene homolog (avian)	0.0604619	0.0456749	2.88005
4012	ErbB signaling pathway	LOC100156321	PREDICTED: Sus scrofa similar to SHC-transforming protein 1 (SH2 domain protein C1) (Src homology 2 domain-containing-transforming protein C1), transcript variant 2 (LOC100156321), mRNA	NM_003029.4	6464	SHC1	SHC (Src homology 2 domain containing) transforming protein 1	0.0645761	0.0480702	4.29672
4012	ErbB signaling pathway	LOC100154503	PREDICTED: Sus scrofa similar to v-src sarcoma (Schmidt-Ruppin A-2) viral oncogene homolog (LOC100154503), mRNA	BC051270.1	6714	SRC	v-src sarcoma (Schmidt-Ruppin A-2) viral oncogene homolog (avian)	0.0645761	0.0480702	4.29672
4012	ErbB signaling pathway	CRK	Sus scrofa v-crk sarcoma virus CT10 oncogene homolog (avian) (CRK), mRNA	BC001718.1	1398	CRK	v-crk sarcoma virus CT10 oncogene homolog (avian)	0.0645761	0.0480702	4.29672
4916	Melanogenesis	KIT	Sus scrofa v-kit Hardy-Zuckerman 4 feline sarcoma viral oncogene homolog (KIT), mRNA	NM_001093772.1	3815	KIT	v-kit Hardy-Zuckerman 4 feline sarcoma viral oncogene homolog	0.0691582	0.0506568	4.18365
4916	Melanogenesis	LOC100154056	PREDICTED: Sus scrofa similar to calmodulin (LOC100154056), mRNA	NM_006888.4	801	CALM1	calmodulin 1 (phosphorylase kinase, delta)	0.0691582	0.0506568	4.18365
4916	Melanogenesis	PORGSA1	Sus scrofa alpha-stimulatory subunit of GTP-binding protein (PORGSA1), mRNA	BC108315.1	2778	GNAS	GNAS complex locus	0.0691582	0.0506568	4.18365
520	Amino sugar and nucleotide sugar metabolism	LOC100156649	PREDICTED: Sus scrofa similar to UDP-N-acteylglucosamine pyrophosphorylase 1 (LOC100156649), mRNA	NM_003115.4	6675	UAP1	UDP-N-acteylglucosamine pyrophosphorylase 1	0.0716045	0.052004	6.62412
520	Amino sugar and nucleotide sugar metabolism	HEXB	Sus scrofa hexosaminidase B (beta polypeptide) (HEXB), mRNA	NM_000521.3	3074	HEXB	hexosaminidase B (beta polypeptide)	0.0716045	0.052004	6.62412
790	Folate biosynthesis	QDPR	Sus scrofa quinoid dihydropteridine reductase (QDPR), mRNA	AK223437.1	5860	QDPR	quinoid dihydropteridine reductase	0.0747712	0.0537146	26.4965
400	Phenylalanine, tyrosine and tryptophan biosynthesis	GOT2	Sus scrofa glutamic-oxaloacetic transaminase 2, mitochondrial (aspartate aminotransferase 2) (GOT2), nuclear gene encoding mitochondrial protein, mRNA	NM_002080.2	2806	GOT2	glutamic-oxaloacetic transaminase 2, mitochondrial (aspartate aminotransferase 2)	0.0747712	0.0537146	26.4965
4120	Ubiquitin mediated proteolysis	LOC100153537	PREDICTED: Sus scrofa similar to Probable E3 ubiquitin-protein ligase HERC1 (HECT domain and RCC1-like domain-containing protein 1) (p532) (p619) (LOC100153537), mRNA	NM_003922.3	8925	HERC1	hect (homologous to the E6-AP (UBE3A) carboxyl terminus) domain and RCC1 (CHC1)-like domain (RLD) 1	0.0838825	0.0584352	3.87753
4120	Ubiquitin mediated proteolysis	LOC100152196	PREDICTED: Sus scrofa similar to ubiquitin-conjugating enzyme E2W (putative) (LOC100152196), mRNA	NM_018299.3	55284	UBE2W	ubiquitin-conjugating enzyme E2W (putative)	0.0838825	0.0584352	3.87753
4120	Ubiquitin mediated proteolysis	LOC100153133	Sus scrofa clone rmed03c_e6.y1.abd, mRNA sequence	NM_007019.2	11065	UBE2C	ubiquitin-conjugating enzyme E2C	0.0838825	0.0584352	3.87753
600	Sphingolipid metabolism	SGMS1	Sus scrofa sphingomyelin synthase 1 (SGMS1), mRNA	AY280959.1	259230	SGMS1	sphingomyelin synthase 1	0.0890753	0.061	5.8881
600	Sphingolipid metabolism	LOC100155051	PREDICTED: Sus scrofa similar to sphingosine-1-phosphate phosphatase 1 (LOC100155051), mRNA	NM_030791.2	81537	SGPP1	sphingosine-1-phosphate phosphatase 1	0.0890753	0.061	5.8881
533	Keratan sulfate biosynthesis	FUT8	Sus scrofa mRNA, clone:AMP010005H10, expressed in alveolar macrophage	NM_178154.1	2530	FUT8	fucosyltransferase 8 (alpha (1,6) fucosyltransferase)	0.111104	0.0709775	17.6643
930	Caprolactam degradation	HADHA	Sus scrofa hydroxyacyl-Coenzyme A dehydrogenase/3-ketoacyl-Coenzyme A thiolase/enoyl-Coenzyme A hydratase (trifunctional protein), alpha subunit (HADHA), nuclear gene encoding mitochondrial protein, mRNA	NM_000182.4	3030	HADHA	hydroxyacyl-Coenzyme A dehydrogenase/3-ketoacyl-Coenzyme A thiolase/enoyl-Coenzyme A hydratase (trifunctional protein), alpha subunit	0.111104	0.0709775	17.6643
280	Valine, leucine and isoleucine degradation	HADHA	Sus scrofa hydroxyacyl-Coenzyme A dehydrogenase/3-ketoacyl-Coenzyme A thiolase/enoyl-Coenzyme A hydratase (trifunctional protein), alpha subunit (HADHA), nuclear gene encoding mitochondrial protein, mRNA	NM_000182.4	3030	HADHA	hydroxyacyl-Coenzyme A dehydrogenase/3-ketoacyl-Coenzyme A thiolase/enoyl-Coenzyme A hydratase (trifunctional protein), alpha subunit	0.128056	0.0777878	4.81754
280	Valine, leucine and isoleucine degradation	DLD	Sus scrofa dihydrolipoamide dehydrogenase (DLD), mRNA	NM_000108.3	1738	DLD	dihydrolipoamide dehydrogenase	0.128056	0.0777878	4.81754
3050	Proteasome	LOC100153923	PREDICTED: Sus scrofa similar to Proteasome (prosome, macropain) subunit, beta type, 4 (LOC100153923), mRNA	BC008314.2	5692	PSMB4	proteasome (prosome, macropain) subunit, beta type, 4	0.138551	0.0816789	4.60808
564	Glycerophospholipid metabolism	LOC100156809	PREDICTED: Sus scrofa similar to Phosphatidylserine synthase 1 (LOC100156809), mRNA	BC002376.2	9791	PTDSS1	phosphatidylserine synthase 1	0.138551	0.0816789	4.60808
564	Glycerophospholipid metabolism	LOC100153506	PREDICTED: Sus scrofa similar to Phosphatidylserine decarboxylase proenzyme (LOC100153506), mRNA	CR611660.1	23761	PISD	phosphatidylserine decarboxylase	0.138551	0.0816789	4.60808
3050	Proteasome	PSME1	Sus scrofa proteasome (prosome, macropain) activator subunit 1 (PA28 alpha) (PSME1), mRNA	NM_006263.2	5720	PSME1	proteasome (prosome, macropain) activator subunit 1 (PA28 alpha)	0.138551	0.0816789	4.60808
3050	Proteasome	LOC100153923	Sus scrofa mRNA, clone:THY010107F05, expressed in thymus	BC008314.2	5692	PSMB4	proteasome (prosome, macropain) subunit, beta type, 4	0.138551	0.0816789	4.60808
40	Pentose and glucuronate interconversions	GUSB	Sus scrofa glucuronidase, beta (GUSB), mRNA	NM_000181.3	2990	GUSB	glucuronidase, beta	0.146753	0.0845636	13.2482
760	Nicotinate and nicotinamide metabolism	ENPP1	PREDICTED: Sus scrofa ectonucleotide pyrophosphatase/phosphodiesterase 1 (ENPP1), mRNA	NM_006208.2	5167	ENPP1	ectonucleotide pyrophosphatase/phosphodiesterase 1	0.146753	0.0845636	13.2482
4710	Circadian rhythm - mammal	LOC100153282	PREDICTED: Sus scrofa similar to cryptochrome 1 (photolyase-like) (LOC100153282), mRNA	NM_004075.3	1407	CRY1	cryptochrome 1 (photolyase-like)	0.146753	0.0845636	13.2482
920	Sulfur metabolism	LOC100156262	PREDICTED: Sus scrofa similar to 3-phosphoadenosine 5-phosphosulfate synthase 2 (LOC100156262), mRNA	NM_004670.3	9060	PAPSS2	3'-phosphoadenosine 5'-phosphosulfate synthase 2	0.146753	0.0845636	13.2482
950	Alkaloid biosynthesis I	GOT2	Sus scrofa glutamic-oxaloacetic transaminase 2, mitochondrial (aspartate aminotransferase 2) (GOT2), nuclear gene encoding mitochondrial protein, mRNA	NM_002080.2	2806	GOT2	glutamic-oxaloacetic transaminase 2, mitochondrial (aspartate aminotransferase 2)	0.146753	0.0845636	13.2482
62	Fatty acid elongation in mitochondria	HADHA	Sus scrofa hydroxyacyl-Coenzyme A dehydrogenase/3-ketoacyl-Coenzyme A thiolase/enoyl-Coenzyme A hydratase (trifunctional protein), alpha subunit (HADHA), nuclear gene encoding mitochondrial protein, mRNA	NM_000182.4	3030	HADHA	hydroxyacyl-Coenzyme A dehydrogenase/3-ketoacyl-Coenzyme A thiolase/enoyl-Coenzyme A hydratase (trifunctional protein), alpha subunit	0.146753	0.0845636	13.2482
630	Glyoxylate and dicarboxylate metabolism	CS	Sus scrofa citrate synthase (CS), nuclear gene encoding mitochondrial protein, mRNA	BC072016.1	1431	CS	citrate synthase	0.146753	0.0845636	13.2482
10	Glycolysis / Gluconeogenesis	DLD	Sus scrofa dihydrolipoamide dehydrogenase (DLD), mRNA	NM_000108.3	1738	DLD	dihydrolipoamide dehydrogenase	0.149317	0.0854388	4.41608
10	Glycolysis / Gluconeogenesis	GPI	Sus scrofa glucose phosphate isomerase (GPI), mRNA	NM_000175.2	2821	GPI	glucose phosphate isomerase	0.149317	0.0854388	4.41608
4370	VEGF signaling pathway	LOC100154469	PREDICTED: Sus scrofa similar to cytoplasmic nuclear factor of activated T-cells 4 (LOC100154469), mRNA	BC008857.2	4776	NFATC4	nuclear factor of activated T-cells, cytoplasmic, calcineurin-dependent 4	0.171607	0.0926792	4.07638
4370	VEGF signaling pathway	LOC100154503	PREDICTED: Sus scrofa similar to v-src sarcoma (Schmidt-Ruppin A-2) viral oncogene homolog (LOC100154503), mRNA	BC051270.1	6714	SRC	v-src sarcoma (Schmidt-Ruppin A-2) viral oncogene homolog (avian)	0.171607	0.0926792	4.07638
740	Riboflavin metabolism	ENPP1	PREDICTED: Sus scrofa ectonucleotide pyrophosphatase/phosphodiesterase 1 (ENPP1), mRNA	NM_006208.2	5167	ENPP1	ectonucleotide pyrophosphatase/phosphodiesterase 1	0.181731	0.0957061	10.5986
632	Benzoate degradation via CoA ligation	HADHA	Sus scrofa hydroxyacyl-Coenzyme A dehydrogenase/3-ketoacyl-Coenzyme A thiolase/enoyl-Coenzyme A hydratase (trifunctional protein), alpha subunit (HADHA), nuclear gene encoding mitochondrial protein, mRNA	NM_000182.4	3030	HADHA	hydroxyacyl-Coenzyme A dehydrogenase/3-ketoacyl-Coenzyme A thiolase/enoyl-Coenzyme A hydratase (trifunctional protein), alpha subunit	0.181731	0.0957061	10.5986
903	Limonene and pinene degradation	HADHA	Sus scrofa hydroxyacyl-Coenzyme A dehydrogenase/3-ketoacyl-Coenzyme A thiolase/enoyl-Coenzyme A hydratase (trifunctional protein), alpha subunit (HADHA), nuclear gene encoding mitochondrial protein, mRNA	NM_000182.4	3030	HADHA	hydroxyacyl-Coenzyme A dehydrogenase/3-ketoacyl-Coenzyme A thiolase/enoyl-Coenzyme A hydratase (trifunctional protein), alpha subunit	0.181731	0.0957061	10.5986
330	Arginine and proline metabolism	LOC100155893	Sus scrofa mRNA, clone:AMP010005E06, expressed in alveolar macrophage	AK312484.1	384	ARG2	arginase, type II	0.183103	0.0961048	3.9254
330	Arginine and proline metabolism	LOC100155893	PREDICTED: Sus scrofa similar to arginase, type II (LOC100155893), mRNA	NM_001172.3	384	ARG2	arginase, type II	0.183103	0.0961048	3.9254
330	Arginine and proline metabolism	GOT2	Sus scrofa glutamic-oxaloacetic transaminase 2, mitochondrial (aspartate aminotransferase 2) (GOT2), nuclear gene encoding mitochondrial protein, mRNA	NM_002080.2	2806	GOT2	glutamic-oxaloacetic transaminase 2, mitochondrial (aspartate aminotransferase 2)	0.183103	0.0961048	3.9254
190	Oxidative phosphorylation	SDHD	Sus scrofa succinate dehydrogenase complex, subunit D, integral membrane protein (SDHD), nuclear gene encoding mitochondrial protein, mRNA	BC012603.1	6392	SDHD	succinate dehydrogenase complex, subunit D, integral membrane protein	0.185471	0.0967864	2.7891
190	Oxidative phosphorylation	LOC100152232	PREDICTED: Sus scrofa similar to cytochrome c oxidase subunit VIa polypeptide 1 (LOC100152232), mRNA	NG_004806.3	285849	COX6A1P2	cytochrome c oxidase subunit VIa polypeptide 1 pseudogene 2	0.185471	0.0967864	2.7891
190	Oxidative phosphorylation	ATP6V1H	Sus scrofa ATPase, H+ transporting, lysosomal 50/57kDa, V1 subunit H (ATP6V1H), mRNA	NM_015941.2	51606	ATP6V1H	ATPase, H+ transporting, lysosomal 50/57kDa, V1 subunit H	0.185471	0.0967864	2.7891
5211	Renal cell carcinoma	HIF1A	Sus scrofa hypoxia inducible factor 1, alpha subunit (basic helix-loop-helix transcription factor) (HIF1A), mRNA	NM_001530.3	3091	HIF1A	hypoxia inducible factor 1, alpha subunit (basic helix-loop-helix transcription factor)	0.194818	0.0994025	3.78521
5211	Renal cell carcinoma	CRK	Sus scrofa v-crk sarcoma virus CT10 oncogene homolog (avian) (CRK), mRNA	BC001718.1	1398	CRK	v-crk sarcoma virus CT10 oncogene homolog (avian)	0.194818	0.0994025	3.78521
4620	Toll-like receptor signaling pathway	NFKB1	Sus scrofa nuclear factor of kappa light polypeptide gene enhancer in B-cells 1 (NFKB1), mRNA	NM_003998.3	4790	NFKB1	nuclear factor of kappa light polypeptide gene enhancer in B-cells 1	0.200625	0.10097	2.69456
4620	Toll-like receptor signaling pathway	TBK1	Sus scrofa TANK-binding kinase 1 (TBK1), mRNA	AK291039.1	29110	TBK1	TANK-binding kinase 1	0.200625	0.10097	2.69456
4620	Toll-like receptor signaling pathway	RELA	Sus scrofa v-rel reticuloendotheliosis viral oncogene homolog A (avian) (RELA), mRNA	NM_021975.3	5970	RELA	v-rel reticuloendotheliosis viral oncogene homolog A (avian)	0.200625	0.10097	2.69456
604	Glycosphingolipid biosynthesis - ganglio series	HEXB	Sus scrofa hexosaminidase B (beta polypeptide) (HEXB), mRNA	NM_000521.3	3074	HEXB	hexosaminidase B (beta polypeptide)	0.21605	0.104933	8.83216
30	Pentose phosphate pathway	GPI	Sus scrofa glucose phosphate isomerase (GPI), mRNA	NM_000175.2	2821	GPI	glucose phosphate isomerase	0.21605	0.104933	8.83216
563	Glycosylphosphatidylinositol(GPI)-anchor biosynthesis	PIGK	Sus scrofa phosphatidylinositol glycan anchor biosynthesis, class K (PIGK), mRNA	NM_005482.2	10026	PIGK	phosphatidylinositol glycan anchor biosynthesis, class K	0.21605	0.104933	8.83216
5218	Melanoma	CDK4	Sus scrofa cyclin-dependent kinase 4 (CDK4), mRNA	BC010153.2	1019	CDK4	cyclin-dependent kinase 4	0.218851	0.105624	3.53286
5218	Melanoma	PTEN	PREDICTED: Sus scrofa similar to MMAC1 (LOC100156264), mRNA					0.218851	0.105624	3.53286
4514	Cell adhesion molecules (CAMs)	LOC100156504	PREDICTED: Sus scrofa similar to Neogenin (LOC100156504), mRNA	NM_002499.2	4756	NEO1	neogenin homolog 1 (chicken)	0.232344	0.10883	2.52347
4514	Cell adhesion molecules (CAMs)	LOC100156236	PREDICTED: Sus scrofa similar to neuroligin 3 (LOC100156236), mRNA	NM_018977.3	54413	NLGN3	neuroligin 3	0.232344	0.10883	2.52347
4514	Cell adhesion molecules (CAMs)	ITGB1	Sus scrofa integrin, beta 1 (fibronectin receptor, beta polypeptide, antigen CD29 includes MDF2, MSK12) (ITGB1), mRNA	BC020057.1	3688	ITGB1	integrin, beta 1 (fibronectin receptor, beta polypeptide, antigen CD29 includes MDF2, MSK12)	0.232344	0.10883	2.52347
4115	p53 signaling pathway	CDK4	Sus scrofa cyclin-dependent kinase 4 (CDK4), mRNA	BC010153.2	1019	CDK4	cyclin-dependent kinase 4	0.243613	0.111366	3.31206
590	Arachidonic acid metabolism	GPX4	Sus scrofa glutathione peroxidase 4 (GPX4), mRNA	BC058329.1	2879	GPX4	glutathione peroxidase 4 (phospholipid hydroperoxidase)	0.243613	0.111366	3.31206
590	Arachidonic acid metabolism	LOC654407	Sus scrofa microsomal prostaglandin E synthase-1 (LOC654407), mRNA	NM_004878.4	9536	PTGES	prostaglandin E synthase	0.243613	0.111366	3.31206
4115	p53 signaling pathway	PTEN	PREDICTED: Sus scrofa similar to MMAC1 (LOC100156264), mRNA					0.243613	0.111366	3.31206
720	Reductive carboxylate cycle (CO2 fixation)	ACL	Sus scrofa ATP citrate lyase (ACL), mRNA	AK295675.1	47	ACLY	ATP citrate lyase	0.249723	0.112691	7.57042
532	Chondroitin sulfate biosynthesis	LOC100156261	PREDICTED: Sus scrofa similar to Chondroitin sulfate synthase 1 (Glucuronosyl-N-acetylgalactosaminyl-proteoglycan 4-beta-N-acetylgalactosaminyltransferase 1) (N-acetylgalactosaminyl-proteoglycan 3-beta-glucuronosyltransferase 1) (Chondroitin glucuronyltra	BC046247.1	22856	CHSY1	chondroitin sulfate synthase 1	0.249723	0.112691	7.57042
4130	SNARE interactions in vesicular transport	LOC100157002	PREDICTED: Sus scrofa similar to vesicle trafficking protein sec22b (LOC100157002), mRNA	BC001364.2	9554	SEC22B	SEC22 vesicle trafficking protein homolog B (S. cerevisiae)	0.249723	0.112691	7.57042
4742	Taste transduction	PORGSA1	Sus scrofa alpha-stimulatory subunit of GTP-binding protein (PORGSA1), mRNA	BC108315.1	2778	GNAS	GNAS complex locus	0.249723	0.112691	7.57042
4730	Long-term depression	PPP2R1A	Sus scrofa protein phosphatase 2 (formerly 2A), regulatory subunit A, alpha isoform (PPP2R1A), mRNA	NM_014225.4	5518	PPP2R1A	protein phosphatase 2 (formerly 2A), regulatory subunit A, alpha isoform	0.256239	0.114067	3.21169
4730	Long-term depression	PORGSA1	Sus scrofa alpha-stimulatory subunit of GTP-binding protein (PORGSA1), mRNA	BC108315.1	2778	GNAS	GNAS complex locus	0.256239	0.114067	3.21169
4260	Cardiac muscle contraction	LOC396828	PREDICTED: Sus scrofa Na,K-ATPase alpha 2 subunit (LOC396828), mRNA	AB018321.2	477	ATP1A2	ATPase, Na+/K+ transporting, alpha 2 (+) polypeptide	0.269016	0.11666	3.11723
4260	Cardiac muscle contraction	LOC100152232	PREDICTED: Sus scrofa similar to cytochrome c oxidase subunit VIa polypeptide 1 (LOC100152232), mRNA	NG_004806.3	285849	COX6A1P2	cytochrome c oxidase subunit VIa polypeptide 1 pseudogene 2	0.269016	0.11666	3.11723
770	Pantothenate and CoA biosynthesis	ENPP1	PREDICTED: Sus scrofa ectonucleotide pyrophosphatase/phosphodiesterase 1 (ENPP1), mRNA	NM_006208.2	5167	ENPP1	ectonucleotide pyrophosphatase/phosphodiesterase 1	0.282762	0.119304	6.62412
511	Other glycan degradation	HEXB	Sus scrofa hexosaminidase B (beta polypeptide) (HEXB), mRNA	NM_000521.3	3074	HEXB	hexosaminidase B (beta polypeptide)	0.282762	0.119304	6.62412
603	Glycosphingolipid biosynthesis - globo series	HEXB	Sus scrofa hexosaminidase B (beta polypeptide) (HEXB), mRNA	NM_000521.3	3074	HEXB	hexosaminidase B (beta polypeptide)	0.282762	0.119304	6.62412
1040	Biosynthesis of unsaturated fatty acids	HADHA	Sus scrofa hydroxyacyl-Coenzyme A dehydrogenase/3-ketoacyl-Coenzyme A thiolase/enoyl-Coenzyme A hydratase (trifunctional protein), alpha subunit (HADHA), nuclear gene encoding mitochondrial protein, mRNA	NM_000182.4	3030	HADHA	hydroxyacyl-Coenzyme A dehydrogenase/3-ketoacyl-Coenzyme A thiolase/enoyl-Coenzyme A hydratase (trifunctional protein), alpha subunit	0.282762	0.119304	6.62412
3410	Base excision repair	HMGB1	Sus scrofa high-mobility group box 1 (HMGB1), mRNA	NM_002128.4	3146	HMGB1	high-mobility group box 1	0.282762	0.119304	6.62412
3010	Ribosome	RPL14	Sus scrofa ribosomal protein L14 (RPL14), mRNA	NM_003973.3	9045	RPL14	ribosomal protein L14	0.308142	0.126763	2.86448
3010	Ribosome	LOC100049695	Sus scrofa mRNA, clone:OVR010070H08, expressed in ovary	AK129823.1	6175	RPLP0	ribosomal protein, large, P0	0.308142	0.126763	2.86448
360	Phenylalanine metabolism	GOT2	Sus scrofa glutamic-oxaloacetic transaminase 2, mitochondrial (aspartate aminotransferase 2) (GOT2), nuclear gene encoding mitochondrial protein, mRNA	NM_002080.2	2806	GOT2	glutamic-oxaloacetic transaminase 2, mitochondrial (aspartate aminotransferase 2)	0.315179	0.128766	5.8881
4540	Gap junction	LOC100154503	PREDICTED: Sus scrofa similar to v-src sarcoma (Schmidt-Ruppin A-2) viral oncogene homolog (LOC100154503), mRNA	BC051270.1	6714	SRC	v-src sarcoma (Schmidt-Ruppin A-2) viral oncogene homolog (avian)	0.334798	0.134207	2.71759
4540	Gap junction	PORGSA1	Sus scrofa alpha-stimulatory subunit of GTP-binding protein (PORGSA1), mRNA	BC108315.1	2778	GNAS	GNAS complex locus	0.334798	0.134207	2.71759
450	Selenoamino acid metabolism	LOC100156262	PREDICTED: Sus scrofa similar to 3-phosphoadenosine 5-phosphosulfate synthase 2 (LOC100156262), mRNA	NM_004670.3	9060	PAPSS2	3'-phosphoadenosine 5'-phosphosulfate synthase 2	0.346985	0.137485	5.29929
410	beta-Alanine metabolism	HADHA	Sus scrofa hydroxyacyl-Coenzyme A dehydrogenase/3-ketoacyl-Coenzyme A thiolase/enoyl-Coenzyme A hydratase (trifunctional protein), alpha subunit (HADHA), nuclear gene encoding mitochondrial protein, mRNA	NM_000182.4	3030	HADHA	hydroxyacyl-Coenzyme A dehydrogenase/3-ketoacyl-Coenzyme A thiolase/enoyl-Coenzyme A hydratase (trifunctional protein), alpha subunit	0.346985	0.137485	5.29929
4140	Regulation of autophagy	PIK3C3	Sus scrofa phosphoinositide-3-kinase, class 3 (PIK3C3), mRNA	BC053651.1	5289	PIK3C3	phosphoinositide-3-kinase, class 3	0.346985	0.137485	5.29929
4920	Adipocytokine signaling pathway	NFKB1	Sus scrofa nuclear factor of kappa light polypeptide gene enhancer in B-cells 1 (NFKB1), mRNA	NM_003998.3	4790	NFKB1	nuclear factor of kappa light polypeptide gene enhancer in B-cells 1	0.36183	0.141376	2.58502
4920	Adipocytokine signaling pathway	RELA	Sus scrofa v-rel reticuloendotheliosis viral oncogene homolog A (avian) (RELA), mRNA	NM_021975.3	5970	RELA	v-rel reticuloendotheliosis viral oncogene homolog A (avian)	0.36183	0.141376	2.58502
710	Carbon fixation in photosynthetic organisms	GOT2	Sus scrofa glutamic-oxaloacetic transaminase 2, mitochondrial (aspartate aminotransferase 2) (GOT2), nuclear gene encoding mitochondrial protein, mRNA	NM_002080.2	2806	GOT2	glutamic-oxaloacetic transaminase 2, mitochondrial (aspartate aminotransferase 2)	0.378192	0.145543	4.81754
2010	ABC transporters	ABCG2	Sus scrofa ATP-binding cassette, sub-family G (WHITE), member 2 (ABCG2), mRNA	AK290000.1	9429	ABCG2	ATP-binding cassette, sub-family G (WHITE), member 2	0.378192	0.145543	4.81754
4340	Hedgehog signaling pathway	BMP4	Sus scrofa bone morphogenetic protein 4 (BMP4), mRNA	BX161385.1	652	BMP4	bone morphogenetic protein 4	0.408811	0.153011	4.41608
5217	Basal cell carcinoma	BMP4	Sus scrofa bone morphogenetic protein 4 (BMP4), mRNA	BX161385.1	652	BMP4	bone morphogenetic protein 4	0.408811	0.153011	4.41608
601	Glycosphingolipid biosynthesis - lacto and neolacto series	B3GNT5	Sus scrofa UDP-GlcNAc:betaGal beta-1,3-N-acetylglucosaminyltransferase 5 (B3GNT5), mRNA	NM_032047.4	84002	B3GNT5	UDP-GlcNAc:betaGal beta-1,3-N-acetylglucosaminyltransferase 5	0.408811	0.153011	4.41608
4210	Apoptosis	NFKB1	Sus scrofa nuclear factor of kappa light polypeptide gene enhancer in B-cells 1 (NFKB1), mRNA	NM_003998.3	4790	NFKB1	nuclear factor of kappa light polypeptide gene enhancer in B-cells 1	0.430633	0.158088	2.30404
4210	Apoptosis	RELA	Sus scrofa v-rel reticuloendotheliosis viral oncogene homolog A (avian) (RELA), mRNA	NM_021975.3	5970	RELA	v-rel reticuloendotheliosis viral oncogene homolog A (avian)	0.430633	0.158088	2.30404
983	Drug metabolism - other enzymes	GUSB	Sus scrofa glucuronidase, beta (GUSB), mRNA	NM_000181.3	2990	GUSB	glucuronidase, beta	0.438853	0.159951	4.07638
4320	Dorso-ventral axis formation	LOC100153369	PREDICTED: Sus scrofa similar to Neurogenic locus notch homolog protein 2 precursor (Notch 2) (hN2) (LOC100153369), partial mRNA	NM_024408.2	4853	NOTCH2	Notch homolog 2 (Drosophila)	0.46833	0.166415	3.78521
250	Alanine, aspartate and glutamate metabolism	GOT2	Sus scrofa glutamic-oxaloacetic transaminase 2, mitochondrial (aspartate aminotransferase 2) (GOT2), nuclear gene encoding mitochondrial protein, mRNA	NM_002080.2	2806	GOT2	glutamic-oxaloacetic transaminase 2, mitochondrial (aspartate aminotransferase 2)	0.46833	0.166415	3.78521
650	Butanoate metabolism	HADHA	Sus scrofa hydroxyacyl-Coenzyme A dehydrogenase/3-ketoacyl-Coenzyme A thiolase/enoyl-Coenzyme A hydratase (trifunctional protein), alpha subunit (HADHA), nuclear gene encoding mitochondrial protein, mRNA	NM_000182.4	3030	HADHA	hydroxyacyl-Coenzyme A dehydrogenase/3-ketoacyl-Coenzyme A thiolase/enoyl-Coenzyme A hydratase (trifunctional protein), alpha subunit	0.46833	0.166415	3.78521
260	Glycine, serine and threonine metabolism	DLD	Sus scrofa dihydrolipoamide dehydrogenase (DLD), mRNA	NM_000108.3	1738	DLD	dihydrolipoamide dehydrogenase	0.46833	0.166415	3.78521
230	Purine metabolism	ENPP1	PREDICTED: Sus scrofa ectonucleotide pyrophosphatase/phosphodiesterase 1 (ENPP1), mRNA	NM_006208.2	5167	ENPP1	ectonucleotide pyrophosphatase/phosphodiesterase 1	0.472469	0.167297	2.16298
230	Purine metabolism	LOC100156262	PREDICTED: Sus scrofa similar to 3-phosphoadenosine 5-phosphosulfate synthase 2 (LOC100156262), mRNA	NM_004670.3	9060	PAPSS2	3'-phosphoadenosine 5'-phosphosulfate synthase 2	0.472469	0.167297	2.16298
4612	Antigen processing and presentation	HSP90	Sus scrofa 90-kDa heat shock protein (HSP90), mRNA	NM_005348.3	3320	HSP90AA1	heat shock protein 90kDa alpha (cytosolic), class A member 1	0.472469	0.167297	2.16298
4612	Antigen processing and presentation	PSME1	Sus scrofa proteasome (prosome, macropain) activator subunit 1 (PA28 alpha) (PSME1), mRNA	NM_006263.2	5720	PSME1	proteasome (prosome, macropain) activator subunit 1 (PA28 alpha)	0.472469	0.167297	2.16298
4150	mTOR signaling pathway	HIF1A	Sus scrofa hypoxia inducible factor 1, alpha subunit (basic helix-loop-helix transcription factor) (HIF1A), mRNA	NM_001530.3	3091	HIF1A	hypoxia inducible factor 1, alpha subunit (basic helix-loop-helix transcription factor)	0.497251	0.174541	3.53286
350	Tyrosine metabolism	GOT2	Sus scrofa glutamic-oxaloacetic transaminase 2, mitochondrial (aspartate aminotransferase 2) (GOT2), nuclear gene encoding mitochondrial protein, mRNA	NM_002080.2	2806	GOT2	glutamic-oxaloacetic transaminase 2, mitochondrial (aspartate aminotransferase 2)	0.497251	0.174541	3.53286
380	Tryptophan metabolism	HADHA	Sus scrofa hydroxyacyl-Coenzyme A dehydrogenase/3-ketoacyl-Coenzyme A thiolase/enoyl-Coenzyme A hydratase (trifunctional protein), alpha subunit (HADHA), nuclear gene encoding mitochondrial protein, mRNA	NM_000182.4	3030	HADHA	hydroxyacyl-Coenzyme A dehydrogenase/3-ketoacyl-Coenzyme A thiolase/enoyl-Coenzyme A hydratase (trifunctional protein), alpha subunit	0.497251	0.174541	3.53286
565	Ether lipid metabolism	PAFAH1B1	Sus scrofa platelet-activating factor acetylhydrolase, isoform Ib, alpha subunit 45kDa (PAFAH1B1), mRNA	NM_000430.3	5048	PAFAH1B1	platelet-activating factor acetylhydrolase 1b, regulatory subunit 1 (45kDa)	0.497251	0.174541	3.53286
4650	Natural killer cell mediated cytotoxicity	LOC100156321	PREDICTED: Sus scrofa similar to SHC-transforming protein 1 (SH2 domain protein C1) (Src homology 2 domain-containing-transforming protein C1), transcript variant 2 (LOC100156321), mRNA	NM_003029.4	6464	SHC1	SHC (Src homology 2 domain containing) transforming protein 1	0.542575	0.187468	1.9627
4650	Natural killer cell mediated cytotoxicity	LOC100154469	PREDICTED: Sus scrofa similar to cytoplasmic nuclear factor of activated T-cells 4 (LOC100154469), mRNA	BC008857.2	4776	NFATC4	nuclear factor of activated T-cells, cytoplasmic, calcineurin-dependent 4	0.542575	0.187468	1.9627
640	Propanoate metabolism	HADHA	Sus scrofa hydroxyacyl-Coenzyme A dehydrogenase/3-ketoacyl-Coenzyme A thiolase/enoyl-Coenzyme A hydratase (trifunctional protein), alpha subunit (HADHA), nuclear gene encoding mitochondrial protein, mRNA	NM_000182.4	3030	HADHA	hydroxyacyl-Coenzyme A dehydrogenase/3-ketoacyl-Coenzyme A thiolase/enoyl-Coenzyme A hydratase (trifunctional protein), alpha subunit	0.553469	0.190514	3.11723
5020	Prion diseases	HSPA5	PREDICTED: Sus scrofa heat shock 70kDa protein 5 (HSPA5), partial mRNA	NM_005347.3	3309	HSPA5	heat shock 70kDa protein 5 (glucose-regulated protein, 78kDa)	0.580787	0.198055	2.94405
4060	Cytokine-cytokine receptor interaction	KIT	Sus scrofa v-kit Hardy-Zuckerman 4 feline sarcoma viral oncogene homolog (KIT), mRNA	NM_001093772.1	3815	KIT	v-kit Hardy-Zuckerman 4 feline sarcoma viral oncogene homolog	0.584805	0.199153	1.58979
4060	Cytokine-cytokine receptor interaction	CXCL12	Sus scrofa mRNA, clone:UTR010035C06, expressed in uterus	NM_199168.2	6387	CXCL12	chemokine (C-X-C motif) ligand 12 (stromal cell-derived factor 1)	0.584805	0.199153	1.58979
4060	Cytokine-cytokine receptor interaction	LOC100152307	PREDICTED: Sus scrofa similar to activin A type I receptor (LOC100152307), mRNA	NM_001111067.2	90	ACVR1	activin A receptor, type I	0.584805	0.199153	1.58979
71	Fatty acid metabolism	HADHA	Sus scrofa hydroxyacyl-Coenzyme A dehydrogenase/3-ketoacyl-Coenzyme A thiolase/enoyl-Coenzyme A hydratase (trifunctional protein), alpha subunit (HADHA), nuclear gene encoding mitochondrial protein, mRNA	NM_000182.4	3030	HADHA	hydroxyacyl-Coenzyme A dehydrogenase/3-ketoacyl-Coenzyme A thiolase/enoyl-Coenzyme A hydratase (trifunctional protein), alpha subunit	0.607589	0.205319	2.7891
620	Pyruvate metabolism	DLD	Sus scrofa dihydrolipoamide dehydrogenase (DLD), mRNA	NM_000108.3	1738	DLD	dihydrolipoamide dehydrogenase	0.633887	0.212318	2.64965
5213	Endometrial cancer	PTEN	PREDICTED: Sus scrofa similar to MMAC1 (LOC100156264), mRNA					0.633887	0.212318	2.64965
5223	Non-small cell lung cancer	CDK4	Sus scrofa cyclin-dependent kinase 4 (CDK4), mRNA	BC010153.2	1019	CDK4	cyclin-dependent kinase 4	0.659689	0.219068	2.52347
5219	Bladder cancer	CDK4	Sus scrofa cyclin-dependent kinase 4 (CDK4), mRNA	BC010153.2	1019	CDK4	cyclin-dependent kinase 4	0.659689	0.219068	2.52347
4740	Olfactory transduction	LOC100154056	PREDICTED: Sus scrofa similar to calmodulin (LOC100154056), mRNA	NM_006888.4	801	CALM1	calmodulin 1 (phosphorylase kinase, delta)	0.716843	0.233613	0.460808
480	Glutathione metabolism	GPX4	Sus scrofa glutathione peroxidase 4 (GPX4), mRNA	BC058329.1	2879	GPX4	glutathione peroxidase 4 (phospholipid hydroperoxidase)	0.758126	0.243787	2.11972
4630	Jak-STAT signaling pathway	TYK2	Sus scrofa tyrosine kinase 2 (TYK2), mRNA	NM_003331.4	7297	TYK2	tyrosine kinase 2	0.790397	0.251554	1.47203
4630	Jak-STAT signaling pathway	STAT2	Sus scrofa signal transducer and activator of transcription 2 (STAT2), mRNA	BC051284.1	6773	STAT2	signal transducer and activator of transcription 2, 113kDa	0.790397	0.251554	1.47203
4080	Neuroactive ligand-receptor interaction	EDNRA	Sus scrofa endothelin receptor type A (EDNRA), mRNA	NM_001957.3	1909	EDNRA	endothelin receptor type A	0.795208	0.252698	0.495261
5014	Amyotrophic lateral sclerosis (ALS)	LOC733642	PREDICTED: Sus scrofa neurofilament light polypeptide (LOC733642), mRNA	NM_006158.3	4747	NEFL	neurofilament, light polypeptide	0.804605	0.254923	1.9627
982	Drug metabolism - cytochrome P450	FMO1	Sus scrofa flavin containing monooxygenase 1 (FMO1), mRNA	AK290113.1	2326	FMO1	flavin containing monooxygenase 1	0.804605	0.254923	1.9627
4940	Type I diabetes mellitus	CPE	Sus scrofa carboxypeptidase E (CPE), mRNA	BC033866.1	1363	CPE	carboxypeptidase E	0.993196	0.296932	1.47203
5210	Colorectal cancer	SMAD4	Sus scrofa SMAD family member 4 (SMAD4), mRNA	NM_005359.5	4089	SMAD4	SMAD family member 4	0.993196	0.296932	1.47203

## Sheet: LR3 vs LR2-up regulation
path_id	path_name	pig_Gene symbol	pig_Description	human_Genebank	human_Gene ID	human_Gene	human_Gene des	pvalue	FDR	enrichment
1065	Biosynthesis of alkaloids derived from histidine and purine	ENO3	Sus scrofa enolase 3 (beta, muscle) (ENO3), mRNA	NM_053013.2	2027	ENO3	enolase 3 (beta, muscle)	7.32413e-06	7.08199e-06	37.9158
1065	Biosynthesis of alkaloids derived from histidine and purine	PFKM	Sus scrofa phosphofructokinase, muscle (PFKM), mRNA	NM_000289.5	5213	PFKM	phosphofructokinase, muscle	7.32413e-06	7.08199e-06	37.9158
1065	Biosynthesis of alkaloids derived from histidine and purine	ADSL	Sus scrofa adenylosuccinate lyase (ADSL), mRNA	NM_000026.2	158	ADSL	adenylosuccinate lyase	7.32413e-06	7.08199e-06	37.9158
1065	Biosynthesis of alkaloids derived from histidine and purine	PGAM2	Sus scrofa phosphoglycerate mutase 2 (PGAM2), mRNA	NM_000290.3	5224	PGAM2	phosphoglycerate mutase 2 (muscle)	7.32413e-06	7.08199e-06	37.9158
4810	Regulation of actin cytoskeleton	CFL2	Sus scrofa CFL2b variant 1 (CFL2b) mRNA, complete cds	NR_028132.1	1073	CFL2	cofilin 2 (muscle)	8.41151e-06	7.08199e-06	20.8537
4810	Regulation of actin cytoskeleton	LOC100157406	PREDICTED: Sus scrofa similar to Actinin, alpha 2 (LOC100157406), mRNA	NM_001103.2	88	ACTN2	actinin, alpha 2	8.41151e-06	7.08199e-06	20.8537
4810	Regulation of actin cytoskeleton	LOC100154518	PREDICTED: Sus scrofa similar to Actin-related protein 2/3 complex subunit 3 (Arp2/3 complex 21 kDa subunit) (p21-ARC) (LOC100154518), mRNA	NM_005719.2	10094	ARPC3	actin related protein 2/3 complex, subunit 3, 21kDa	8.41151e-06	7.08199e-06	20.8537
4810	Regulation of actin cytoskeleton	EGF	Sus scrofa epidermal growth factor (EGF), mRNA	BC113461.1	1950	EGF	epidermal growth factor (beta-urogastrone)	8.41151e-06	7.08199e-06	20.8537
4810	Regulation of actin cytoskeleton	MYLPF	Sus scrofa fast skeletal myosin light chain 2 (MYLPF), mRNA	NM_013292.3	29895	MYLPF	myosin light chain, phosphorylatable, fast skeletal muscle	8.41151e-06	7.08199e-06	20.8537
4510	Focal adhesion	LOC100155108	PREDICTED: Sus scrofa similar to Thrombospondin-3 (LOC100155108), mRNA	NM_007112.3	7059	THBS3	thrombospondin 3	9.58156e-06	7.08199e-06	20.312
4510	Focal adhesion	LOC100157406	PREDICTED: Sus scrofa similar to Actinin, alpha 2 (LOC100157406), mRNA	NM_001103.2	88	ACTN2	actinin, alpha 2	9.58156e-06	7.08199e-06	20.312
4510	Focal adhesion	EGF	Sus scrofa epidermal growth factor (EGF), mRNA	BC113461.1	1950	EGF	epidermal growth factor (beta-urogastrone)	9.58156e-06	7.08199e-06	20.312
4510	Focal adhesion	MYLPF	Sus scrofa fast skeletal myosin light chain 2 (MYLPF), mRNA	NM_013292.3	29895	MYLPF	myosin light chain, phosphorylatable, fast skeletal muscle	9.58156e-06	7.08199e-06	20.312
4510	Focal adhesion	COL5A1	BX668018 Sus Scrofa library (scac) Sus scrofa cDNA clone scac0026.p.19 5prim, mRNA sequence					9.58156e-06	7.08199e-06	20.312
1070	Biosynthesis of plant hormones	ENO3	Sus scrofa enolase 3 (beta, muscle) (ENO3), mRNA	NM_053013.2	2027	ENO3	enolase 3 (beta, muscle)	1.45101e-05	8.04363e-06	32.0826
1070	Biosynthesis of plant hormones	PFKM	Sus scrofa phosphofructokinase, muscle (PFKM), mRNA	NM_000289.5	5213	PFKM	phosphofructokinase, muscle	1.45101e-05	8.04363e-06	32.0826
1070	Biosynthesis of plant hormones	AMPD1	Sus scrofa adenosine monophosphate deaminase 1 (AMPD1), mRNA	BC141600.1	270	AMPD1	adenosine monophosphate deaminase 1	1.45101e-05	8.04363e-06	32.0826
1070	Biosynthesis of plant hormones	PGAM2	Sus scrofa phosphoglycerate mutase 2 (PGAM2), mRNA	NM_000290.3	5224	PGAM2	phosphoglycerate mutase 2 (muscle)	1.45101e-05	8.04363e-06	32.0826
5219	Bladder cancer	LOC100152215	PREDICTED: Sus scrofa similar to LOC513497 protein (LOC100152215), mRNA	AB451290.1	1026	CDKN1A	cyclin-dependent kinase inhibitor 1A (p21, Cip1)	7.9954e-05	3.06772e-05	44.6865
5219	Bladder cancer	EGF	Sus scrofa epidermal growth factor (EGF), mRNA	BC113461.1	1950	EGF	epidermal growth factor (beta-urogastrone)	7.9954e-05	3.06772e-05	44.6865
5219	Bladder cancer	MMP-2	Sus scrofa gelatinase A (MMP-2), mRNA	NM_004530.4	4313	MMP2	matrix metallopeptidase 2 (gelatinase A, 72kDa gelatinase, 72kDa type IV collagenase)	7.9954e-05	3.06772e-05	44.6865
10	Glycolysis / Gluconeogenesis	ENO3	Sus scrofa enolase 3 (beta, muscle) (ENO3), mRNA	NM_053013.2	2027	ENO3	enolase 3 (beta, muscle)	0.000120839	3.88855e-05	39.1007
10	Glycolysis / Gluconeogenesis	PFKM	Sus scrofa phosphofructokinase, muscle (PFKM), mRNA	NM_000289.5	5213	PFKM	phosphofructokinase, muscle	0.000120839	3.88855e-05	39.1007
10	Glycolysis / Gluconeogenesis	PGAM2	Sus scrofa phosphoglycerate mutase 2 (PGAM2), mRNA	NM_000290.3	5224	PGAM2	phosphoglycerate mutase 2 (muscle)	0.000120839	3.88855e-05	39.1007
1061	Biosynthesis of phenylpropanoids	ENO3	Sus scrofa enolase 3 (beta, muscle) (ENO3), mRNA	NM_053013.2	2027	ENO3	enolase 3 (beta, muscle)	0.000154518	4.3891e-05	36.0929
1061	Biosynthesis of phenylpropanoids	PFKM	Sus scrofa phosphofructokinase, muscle (PFKM), mRNA	NM_000289.5	5213	PFKM	phosphofructokinase, muscle	0.000154518	4.3891e-05	36.0929
1061	Biosynthesis of phenylpropanoids	PGAM2	Sus scrofa phosphoglycerate mutase 2 (PGAM2), mRNA	NM_000290.3	5224	PGAM2	phosphoglycerate mutase 2 (muscle)	0.000154518	4.3891e-05	36.0929
5200	Pathways in cancer	FOS	Sus scrofa mRNA, clone:LVRM10064D11, expressed in liver	NM_005252.3	2353	FOS	FBJ murine osteosarcoma viral oncogene homolog	0.000161644	4.48034e-05	11.3335
5200	Pathways in cancer	TPM3	Sus scrofa TPM3 (TPM3) mRNA, complete cds	BC008407.1	7170	TPM3	tropomyosin 3	0.000161644	4.48034e-05	11.3335
5200	Pathways in cancer	LOC100152215	PREDICTED: Sus scrofa similar to LOC513497 protein (LOC100152215), mRNA	AB451290.1	1026	CDKN1A	cyclin-dependent kinase inhibitor 1A (p21, Cip1)	0.000161644	4.48034e-05	11.3335
5200	Pathways in cancer	EGF	Sus scrofa epidermal growth factor (EGF), mRNA	BC113461.1	1950	EGF	epidermal growth factor (beta-urogastrone)	0.000161644	4.48034e-05	11.3335
5200	Pathways in cancer	MMP-2	Sus scrofa gelatinase A (MMP-2), mRNA	NM_004530.4	4313	MMP2	matrix metallopeptidase 2 (gelatinase A, 72kDa gelatinase, 72kDa type IV collagenase)	0.000161644	4.48034e-05	11.3335
1063	Biosynthesis of alkaloids derived from shikimate pathway	ENO3	Sus scrofa enolase 3 (beta, muscle) (ENO3), mRNA	NM_053013.2	2027	ENO3	enolase 3 (beta, muscle)	0.000215667	5.08997e-05	32.3592
1063	Biosynthesis of alkaloids derived from shikimate pathway	PFKM	Sus scrofa phosphofructokinase, muscle (PFKM), mRNA	NM_000289.5	5213	PFKM	phosphofructokinase, muscle	0.000215667	5.08997e-05	32.3592
1063	Biosynthesis of alkaloids derived from shikimate pathway	PGAM2	Sus scrofa phosphoglycerate mutase 2 (PGAM2), mRNA	NM_000290.3	5224	PGAM2	phosphoglycerate mutase 2 (muscle)	0.000215667	5.08997e-05	32.3592
1064	Biosynthesis of alkaloids derived from ornithine, lysine and nicotinic acid	ENO3	Sus scrofa enolase 3 (beta, muscle) (ENO3), mRNA	NM_053013.2	2027	ENO3	enolase 3 (beta, muscle)	0.000239081	5.30135e-05	31.2806
1064	Biosynthesis of alkaloids derived from ornithine, lysine and nicotinic acid	PFKM	Sus scrofa phosphofructokinase, muscle (PFKM), mRNA	NM_000289.5	5213	PFKM	phosphofructokinase, muscle	0.000239081	5.30135e-05	31.2806
1064	Biosynthesis of alkaloids derived from ornithine, lysine and nicotinic acid	PGAM2	Sus scrofa phosphoglycerate mutase 2 (PGAM2), mRNA	NM_000290.3	5224	PGAM2	phosphoglycerate mutase 2 (muscle)	0.000239081	5.30135e-05	31.2806
1062	Biosynthesis of terpenoids and steroids	ENO3	Sus scrofa enolase 3 (beta, muscle) (ENO3), mRNA	NM_053013.2	2027	ENO3	enolase 3 (beta, muscle)	0.000290743	5.70951e-05	29.3255
1062	Biosynthesis of terpenoids and steroids	PFKM	Sus scrofa phosphofructokinase, muscle (PFKM), mRNA	NM_000289.5	5213	PFKM	phosphofructokinase, muscle	0.000290743	5.70951e-05	29.3255
1062	Biosynthesis of terpenoids and steroids	PGAM2	Sus scrofa phosphoglycerate mutase 2 (PGAM2), mRNA	NM_000290.3	5224	PGAM2	phosphoglycerate mutase 2 (muscle)	0.000290743	5.70951e-05	29.3255
1066	Biosynthesis of alkaloids derived from terpenoid and polyketide	ENO3	Sus scrofa enolase 3 (beta, muscle) (ENO3), mRNA	NM_053013.2	2027	ENO3	enolase 3 (beta, muscle)	0.000319085	5.89611e-05	28.4369
1066	Biosynthesis of alkaloids derived from terpenoid and polyketide	PFKM	Sus scrofa phosphofructokinase, muscle (PFKM), mRNA	NM_000289.5	5213	PFKM	phosphofructokinase, muscle	0.000319085	5.89611e-05	28.4369
1066	Biosynthesis of alkaloids derived from terpenoid and polyketide	PGAM2	Sus scrofa phosphoglycerate mutase 2 (PGAM2), mRNA	NM_000290.3	5224	PGAM2	phosphoglycerate mutase 2 (muscle)	0.000319085	5.89611e-05	28.4369
4010	MAPK signaling pathway	FOS	Sus scrofa mRNA, clone:LVRM10064D11, expressed in liver	NM_005252.3	2353	FOS	FBJ murine osteosarcoma viral oncogene homolog	0.000433842	7.39995e-05	13.6002
4010	MAPK signaling pathway	MEF2C	Sus scrofa myocyte enhancer factor 2C protein (MEF2C) mRNA, complete cds	NM_001131005.1	4208	MEF2C	myocyte enhancer factor 2C	0.000433842	7.39995e-05	13.6002
4010	MAPK signaling pathway	ATF4	Sus scrofa activating transcription factor 4 (tax-responsive enhancer element B67) (ATF4), mRNA	BC073990.1	468	ATF4	activating transcription factor 4 (tax-responsive enhancer element B67)	0.000433842	7.39995e-05	13.6002
4010	MAPK signaling pathway	EGF	Sus scrofa epidermal growth factor (EGF), mRNA	BC113461.1	1950	EGF	epidermal growth factor (beta-urogastrone)	0.000433842	7.39995e-05	13.6002
4530	Tight junction	LOC100157406	PREDICTED: Sus scrofa similar to Actinin, alpha 2 (LOC100157406), mRNA	NM_001103.2	88	ACTN2	actinin, alpha 2	0.000657685	9.95634e-05	22.3433
4530	Tight junction	MYLPF	Sus scrofa fast skeletal myosin light chain 2 (MYLPF), mRNA	NM_013292.3	29895	MYLPF	myosin light chain, phosphorylatable, fast skeletal muscle	0.000657685	9.95634e-05	22.3433
4530	Tight junction	MYH7	Sus scrofa myosin, heavy chain 7, cardiac muscle, beta (MYH7), mRNA	NM_000257.2	4625	MYH7	myosin, heavy chain 7, cardiac muscle, beta	0.000657685	9.95634e-05	22.3433
1100	Metabolic pathways	ENO3	Sus scrofa enolase 3 (beta, muscle) (ENO3), mRNA	NM_053013.2	2027	ENO3	enolase 3 (beta, muscle)	0.000741988	0.000107761	5.25093
1100	Metabolic pathways	PFKM	Sus scrofa phosphofructokinase, muscle (PFKM), mRNA	NM_000289.5	5213	PFKM	phosphofructokinase, muscle	0.000741988	0.000107761	5.25093
1100	Metabolic pathways	AMPD1	Sus scrofa adenosine monophosphate deaminase 1 (AMPD1), mRNA	BC141600.1	270	AMPD1	adenosine monophosphate deaminase 1	0.000741988	0.000107761	5.25093
1100	Metabolic pathways	CKM	Sus scrofa creatine kinase, muscle (CKM), mRNA	AK129878.1	1158	CKM	creatine kinase, muscle	0.000741988	0.000107761	5.25093
1100	Metabolic pathways	LOC100154130	PREDICTED: Sus scrofa similar to NADH dehydrogenase [ubiquinone] 1 beta subcomplex subunit 9 (NADH-ubiquinone oxidoreductase B22 subunit) (Complex I-B22) (CI-B22) (LOC100154130), mRNA	AK313432.1	4715	NDUFB9	NADH dehydrogenase (ubiquinone) 1 beta subcomplex, 9, 22kDa	0.000741988	0.000107761	5.25093
1100	Metabolic pathways	ADSL	Sus scrofa adenylosuccinate lyase (ADSL), mRNA	NM_000026.2	158	ADSL	adenylosuccinate lyase	0.000741988	0.000107761	5.25093
1100	Metabolic pathways	PGAM2	Sus scrofa phosphoglycerate mutase 2 (PGAM2), mRNA	NM_000290.3	5224	PGAM2	phosphoglycerate mutase 2 (muscle)	0.000741988	0.000107761	5.25093
4670	Leukocyte transendothelial migration	LOC100157406	PREDICTED: Sus scrofa similar to Actinin, alpha 2 (LOC100157406), mRNA	NM_001103.2	88	ACTN2	actinin, alpha 2	0.000861729	0.000118322	20.4004
4670	Leukocyte transendothelial migration	MMP-2	Sus scrofa gelatinase A (MMP-2), mRNA	NM_004530.4	4313	MMP2	matrix metallopeptidase 2 (gelatinase A, 72kDa gelatinase, 72kDa type IV collagenase)	0.000861729	0.000118322	20.4004
4670	Leukocyte transendothelial migration	MYLPF	Sus scrofa fast skeletal myosin light chain 2 (MYLPF), mRNA	NM_013292.3	29895	MYLPF	myosin light chain, phosphorylatable, fast skeletal muscle	0.000861729	0.000118322	20.4004
5215	Prostate cancer	ATF4	Sus scrofa activating transcription factor 4 (tax-responsive enhancer element B67) (ATF4), mRNA	BC073990.1	468	ATF4	activating transcription factor 4 (tax-responsive enhancer element B67)	0.000977365	0.000127482	19.5503
5215	Prostate cancer	LOC100152215	PREDICTED: Sus scrofa similar to LOC513497 protein (LOC100152215), mRNA	AB451290.1	1026	CDKN1A	cyclin-dependent kinase inhibitor 1A (p21, Cip1)	0.000977365	0.000127482	19.5503
5215	Prostate cancer	EGF	Sus scrofa epidermal growth factor (EGF), mRNA	BC113461.1	1950	EGF	epidermal growth factor (beta-urogastrone)	0.000977365	0.000127482	19.5503
5214	Glioma	LOC100152215	PREDICTED: Sus scrofa similar to LOC513497 protein (LOC100152215), mRNA	AB451290.1	1026	CDKN1A	cyclin-dependent kinase inhibitor 1A (p21, Cip1)	0.0067185	0.000764215	23.1708
5214	Glioma	EGF	Sus scrofa epidermal growth factor (EGF), mRNA	BC113461.1	1950	EGF	epidermal growth factor (beta-urogastrone)	0.0067185	0.000764215	23.1708
4512	ECM-receptor interaction	LOC100155108	PREDICTED: Sus scrofa similar to Thrombospondin-3 (LOC100155108), mRNA	NM_007112.3	7059	THBS3	thrombospondin 3	0.008275	0.000909711	20.8537
5218	Melanoma	LOC100152215	PREDICTED: Sus scrofa similar to LOC513497 protein (LOC100152215), mRNA	AB451290.1	1026	CDKN1A	cyclin-dependent kinase inhibitor 1A (p21, Cip1)	0.008275	0.000909711	20.8537
5218	Melanoma	EGF	Sus scrofa epidermal growth factor (EGF), mRNA	BC113461.1	1950	EGF	epidermal growth factor (beta-urogastrone)	0.008275	0.000909711	20.8537
4512	ECM-receptor interaction	COL5A1	BX668018 Sus Scrofa library (scac) Sus scrofa cDNA clone scac0026.p.19 5prim, mRNA sequence					0.008275	0.000909711	20.8537
4260	Cardiac muscle contraction	TPM3	Sus scrofa TPM3 (TPM3) mRNA, complete cds	BC008407.1	7170	TPM3	tropomyosin 3	0.0105843	0.00110846	18.4003
4260	Cardiac muscle contraction	TPM2	Sus scrofa tropomyosin 2 (beta) (TPM2), mRNA	NM_213674.1	7169	TPM2	tropomyosin 2 (beta)	0.0105843	0.00110846	18.4003
4012	ErbB signaling pathway	LOC100152215	PREDICTED: Sus scrofa similar to LOC513497 protein (LOC100152215), mRNA	AB451290.1	1026	CDKN1A	cyclin-dependent kinase inhibitor 1A (p21, Cip1)	0.012488	0.00125866	16.9084
4012	ErbB signaling pathway	EGF	Sus scrofa epidermal growth factor (EGF), mRNA	BC113461.1	1950	EGF	epidermal growth factor (beta-urogastrone)	0.012488	0.00125866	16.9084
4350	TGF-beta signaling pathway	LOC100155108	PREDICTED: Sus scrofa similar to Thrombospondin-3 (LOC100155108), mRNA	NM_007112.3	7059	THBS3	thrombospondin 3	0.0152496	0.00147018	15.2588
4350	TGF-beta signaling pathway	DCN	Sus scrofa decorin (DCN), mRNA	NM_001920.3	1634	DCN	decorin	0.0152496	0.00147018	15.2588
4912	GnRH signaling pathway	ATF4	Sus scrofa activating transcription factor 4 (tax-responsive enhancer element B67) (ATF4), mRNA	BC073990.1	468	ATF4	activating transcription factor 4 (tax-responsive enhancer element B67)	0.0182603	0.00168709	13.9025
4912	GnRH signaling pathway	MMP-2	Sus scrofa gelatinase A (MMP-2), mRNA	NM_004530.4	4313	MMP2	matrix metallopeptidase 2 (gelatinase A, 72kDa gelatinase, 72kDa type IV collagenase)	0.0182603	0.00168709	13.9025
230	Purine metabolism	AMPD1	Sus scrofa adenosine monophosphate deaminase 1 (AMPD1), mRNA	BC141600.1	270	AMPD1	adenosine monophosphate deaminase 1	0.0215137	0.00190816	12.7676
230	Purine metabolism	ADSL	Sus scrofa adenylosuccinate lyase (ADSL), mRNA	NM_000026.2	158	ADSL	adenylosuccinate lyase	0.0215137	0.00190816	12.7676
30	Pentose phosphate pathway	PFKM	Sus scrofa phosphofructokinase, muscle (PFKM), mRNA	NM_000289.5	5213	PFKM	phosphofructokinase, muscle	0.0380614	0.00318477	52.1343
52	Galactose metabolism	PFKM	Sus scrofa phosphofructokinase, muscle (PFKM), mRNA	NM_000289.5	5213	PFKM	phosphofructokinase, muscle	0.0505891	0.00405907	39.1007
5010	Alzheimer's disease	LOC100154130	PREDICTED: Sus scrofa similar to NADH dehydrogenase [ubiquinone] 1 beta subcomplex subunit 9 (NADH-ubiquinone oxidoreductase B22 subunit) (Complex I-B22) (CI-B22) (LOC100154130), mRNA	AK313432.1	4715	NDUFB9	NADH dehydrogenase (ubiquinone) 1 beta subcomplex, 9, 22kDa	0.0555188	0.00438372	7.72359
5010	Alzheimer's disease	APOE	Sus scrofa apolipoprotein E (APOE), mRNA	AK314898.1	348	APOE	apolipoprotein E	0.0555188	0.00438372	7.72359
51	Fructose and mannose metabolism	PFKM	Sus scrofa phosphofructokinase, muscle (PFKM), mRNA	NM_000289.5	5213	PFKM	phosphofructokinase, muscle	0.0815643	0.00594077	24.062
250	Alanine, aspartate and glutamate metabolism	ADSL	Sus scrofa adenylosuccinate lyase (ADSL), mRNA	NM_000026.2	158	ADSL	adenylosuccinate lyase	0.0877008	0.0062731	22.3433
910	Nitrogen metabolism	CA3	Sus scrofa carbonic anhydrase III, muscle specific (CA3), mRNA	NM_005181.3	761	CA3	carbonic anhydrase III, muscle specific	0.0877008	0.0062731	22.3433
5216	Thyroid cancer	TPM3	Sus scrofa TPM3 (TPM3) mRNA, complete cds	BC008407.1	7170	TPM3	tropomyosin 3	0.105995	0.00720625	18.4003
5213	Endometrial cancer	EGF	Sus scrofa epidermal growth factor (EGF), mRNA	BC113461.1	1950	EGF	epidermal growth factor (beta-urogastrone)	0.124116	0.00804376	15.6403
5223	Non-small cell lung cancer	EGF	Sus scrofa epidermal growth factor (EGF), mRNA	BC113461.1	1950	EGF	epidermal growth factor (beta-urogastrone)	0.130118	0.00830417	14.8955
4720	Long-term potentiation	ATF4	Sus scrofa activating transcription factor 4 (tax-responsive enhancer element B67) (ATF4), mRNA	BC073990.1	468	ATF4	activating transcription factor 4 (tax-responsive enhancer element B67)	0.148011	0.00903539	13.0336
330	Arginine and proline metabolism	CKM	Sus scrofa creatine kinase, muscle (CKM), mRNA	AK129878.1	1158	CKM	creatine kinase, muscle	0.165736	0.00969961	11.5854
4520	Adherens junction	LOC100157406	PREDICTED: Sus scrofa similar to Actinin, alpha 2 (LOC100157406), mRNA	NM_001103.2	88	ACTN2	actinin, alpha 2	0.177459	0.0101096	10.7864
4115	p53 signaling pathway	LOC100152215	PREDICTED: Sus scrofa similar to LOC513497 protein (LOC100152215), mRNA	AB451290.1	1026	CDKN1A	cyclin-dependent kinase inhibitor 1A (p21, Cip1)	0.194906	0.0106809	9.77517
5210	Colorectal cancer	FOS	Sus scrofa mRNA, clone:LVRM10064D11, expressed in liver	NM_005252.3	2353	FOS	FBJ murine osteosarcoma viral oncogene homolog	0.217912	0.011371	8.68904
5220	Chronic myeloid leukemia	LOC100152215	PREDICTED: Sus scrofa similar to LOC513497 protein (LOC100152215), mRNA	AB451290.1	1026	CDKN1A	cyclin-dependent kinase inhibitor 1A (p21, Cip1)	0.217912	0.011371	8.68904
3010	Ribosome	RPL14	Sus scrofa ribosomal protein L14 (RPL14), mRNA	NM_003973.3	9045	RPL14	ribosomal protein L14	0.223619	0.011532	8.4542
4662	B cell receptor signaling pathway	FOS	Sus scrofa mRNA, clone:LVRM10064D11, expressed in liver	NM_005252.3	2353	FOS	FBJ murine osteosarcoma viral oncogene homolog	0.229307	0.0116889	8.23173
5212	Pancreatic cancer	EGF	Sus scrofa epidermal growth factor (EGF), mRNA	BC113461.1	1950	EGF	epidermal growth factor (beta-urogastrone)	0.229307	0.0116889	8.23173
4540	Gap junction	EGF	Sus scrofa epidermal growth factor (EGF), mRNA	BC113461.1	1950	EGF	epidermal growth factor (beta-urogastrone)	0.234977	0.0118417	8.02066
4270	Vascular smooth muscle contraction	RAMP1	Sus scrofa receptor (G protein-coupled) activity modifying protein 1 (RAMP1), mRNA	NM_005855.2	10267	RAMP1	receptor (G protein-coupled) activity modifying protein 1	0.251881	0.0123534	7.44775
4360	Axon guidance	CFL2	Sus scrofa CFL2b variant 1 (CFL2b) mRNA, complete cds	NR_028132.1	1073	CFL2	cofilin 2 (muscle)	0.268624	0.012834	6.95123
4110	Cell cycle	LOC100152215	PREDICTED: Sus scrofa similar to LOC513497 protein (LOC100152215), mRNA	AB451290.1	1026	CDKN1A	cyclin-dependent kinase inhibitor 1A (p21, Cip1)	0.279699	0.0131384	6.65544
4310	Wnt signaling pathway	SFRP4	Sus scrofa secreted frizzled-related protein 4 (SFRP4), mRNA	NM_003014.3	6424	SFRP4	secreted frizzled-related protein 4	0.29618	0.013573	6.25611
4722	Neurotrophin signaling pathway	ATF4	Sus scrofa activating transcription factor 4 (tax-responsive enhancer element B67) (ATF4), mRNA	BC073990.1	468	ATF4	activating transcription factor 4 (tax-responsive enhancer element B67)	0.312505	0.013983	5.90199
190	Oxidative phosphorylation	LOC100154130	PREDICTED: Sus scrofa similar to NADH dehydrogenase [ubiquinone] 1 beta subcomplex subunit 9 (NADH-ubiquinone oxidoreductase B22 subunit) (Complex I-B22) (CI-B22) (LOC100154130), mRNA	AK313432.1	4715	NDUFB9	NADH dehydrogenase (ubiquinone) 1 beta subcomplex, 9, 22kDa	0.334033	0.014495	5.48782
4620	Toll-like receptor signaling pathway	FOS	Sus scrofa mRNA, clone:LVRM10064D11, expressed in liver	NM_005252.3	2353	FOS	FBJ murine osteosarcoma viral oncogene homolog	0.344695	0.0147373	5.30179
4660	T cell receptor signaling pathway	FOS	Sus scrofa mRNA, clone:LVRM10064D11, expressed in liver	NM_005252.3	2353	FOS	FBJ murine osteosarcoma viral oncogene homolog	0.360562	0.015085	5.04525
5012	Parkinson's disease	LOC100154130	PREDICTED: Sus scrofa similar to NADH dehydrogenase [ubiquinone] 1 beta subcomplex subunit 9 (NADH-ubiquinone oxidoreductase B22 subunit) (Complex I-B22) (CI-B22) (LOC100154130), mRNA	AK313432.1	4715	NDUFB9	NADH dehydrogenase (ubiquinone) 1 beta subcomplex, 9, 22kDa	0.360562	0.015085	5.04525
5016	Huntington's disease	LOC100154130	PREDICTED: Sus scrofa similar to NADH dehydrogenase [ubiquinone] 1 beta subcomplex subunit 9 (NADH-ubiquinone oxidoreductase B22 subunit) (Complex I-B22) (CI-B22) (LOC100154130), mRNA	AK313432.1	4715	NDUFB9	NADH dehydrogenase (ubiquinone) 1 beta subcomplex, 9, 22kDa	0.402144	0.0164346	4.46865
4144	Endocytosis	EGF	Sus scrofa epidermal growth factor (EGF), mRNA	BC113461.1	1950	EGF	epidermal growth factor (beta-urogastrone)	0.432646	0.0173854	4.11586
5322	Systemic lupus erythematosus	LOC100157406	PREDICTED: Sus scrofa similar to Actinin, alpha 2 (LOC100157406), mRNA	NM_001103.2	88	ACTN2	actinin, alpha 2	0.452661	0.0179923	3.91007
4060	Cytokine-cytokine receptor interaction	EGF	Sus scrofa epidermal growth factor (EGF), mRNA	BC113461.1	1950	EGF	epidermal growth factor (beta-urogastrone)	0.549018	0.021739	3.12806

## Sheet: LR3 vs LR2-down regulation
path_id	path_name	pig_Description	pig_Gene symbol	human_Genebank	human_Gene ID	human_Gene	human_Gene des	pvalue	FDR	enrichment
1100	Metabolic pathways	Sus scrofa ATP synthase H+-transporting mitochondrial F1 complex O subunit (LOC733678), nuclear gene encoding mitochondrial protein, mRNA	LOC733678	NM_001697.2	539	ATP5O	ATP synthase, H+ transporting, mitochondrial F1 complex, O subunit	3.99988e-08	7.5406e-08	8.30917
1100	Metabolic pathways	Sus scrofa mRNA for c-myc transcription factor, complete cds	NME2	BC107894.1	654364	NME1-NME2	NME1-NME2 readthrough	3.99988e-08	7.5406e-08	8.30917
1100	Metabolic pathways	Sus scrofa cytochrome c oxidase subunit VIIc (COX7C), nuclear gene encoding mitochondrial protein, mRNA	COX7C	NM_001867.2	1350	COX7C	cytochrome c oxidase subunit VIIc	3.99988e-08	7.5406e-08	8.30917
1100	Metabolic pathways	Sus scrofa lactate dehydrogenase B (LDHB), mRNA	LDHB	NM_002300.5	3945	LDHB	lactate dehydrogenase B	3.99988e-08	7.5406e-08	8.30917
1100	Metabolic pathways	PREDICTED: Sus scrofa similar to ATP synthase, H+ transporting, mitochondrial F1 complex, alpha subunit 1, cardiac muscle (LOC100157880), mRNA	ATP5A1	AK289457.1	498	ATP5A1	ATP synthase, H+ transporting, mitochondrial F1 complex, alpha subunit 1, cardiac muscle	3.99988e-08	7.5406e-08	8.30917
1100	Metabolic pathways	PREDICTED: Sus scrofa similar to Phosphomannomutase 1 (PMM 1) (PMMH-22) (LOC100151790), mRNA	LOC100151790	NM_002676.2	5372	PMM1	phosphomannomutase 1	3.99988e-08	7.5406e-08	8.30917
1100	Metabolic pathways	PREDICTED: Sus scrofa similar to DNA-directed RNA polymerases I and III subunit RPAC2 (RNA polymerases I and III subunit AC2) (DNA-directed RNA polymerase I subunit D) (DNA-directed RNA polymerase I 16 kDa polypeptide) (RPA16) (RPC16) (hRPA19) (AC19) (LOC	LOC100153350	NM_015972.2	51082	POLR1D	polymerase (RNA) I polypeptide D, 16kDa	3.99988e-08	7.5406e-08	8.30917
1100	Metabolic pathways	PREDICTED: Sus scrofa similar to Cytochrome c oxidase copper chaperone (Dopuin) (LOC100156799), mRNA	LOC100156799	BC108317.1	10063	COX17	COX17 cytochrome c oxidase assembly homolog (S. cerevisiae)	3.99988e-08	7.5406e-08	8.30917
1100	Metabolic pathways	Sus scrofa propionyl Coenzyme A carboxylase, beta polypeptide (PCCB), nuclear gene encoding mitochondrial protein, mRNA	PCCB	AK225215.1	5096	PCCB	propionyl Coenzyme A carboxylase, beta polypeptide	3.99988e-08	7.5406e-08	8.30917
1100	Metabolic pathways	Sus scrofa peroxiredoxin 6 (PRDX6), mRNA	PRDX6	AK289352.1	9588	PRDX6	peroxiredoxin 6	3.99988e-08	7.5406e-08	8.30917
1100	Metabolic pathways	Sus scrofa aldose reductase (ALR2), mRNA	ALR2	AK313439.1	231	AKR1B1	aldo-keto reductase family 1, member B1 (aldose reductase)	3.99988e-08	7.5406e-08	8.30917
1100	Metabolic pathways	Sus scrofa mRNA, clone:OVRM10209D07, expressed in ovary	ATIC	NM_004044.6	471	ATIC	5-aminoimidazole-4-carboxamide ribonucleotide formyltransferase/IMP cyclohydrolase	3.99988e-08	7.5406e-08	8.30917
1100	Metabolic pathways	1139821 MARC 4PIG Sus scrofa cDNA 3', mRNA sequence	COX7C					3.99988e-08	7.5406e-08	8.30917
1100	Metabolic pathways	EST0132-1 Swine Lambda TriplEx2 Library Sus scrofa cDNA clone 5-6 3' similar to ATP synthase,mitochondrial F1 complex,O subunit (ATP5O), mRNA sequence	LOC733678					3.99988e-08	7.5406e-08	8.30917
230	Purine metabolism	Sus scrofa mRNA for c-myc transcription factor, complete cds	NME2	BC107894.1	654364	NME1-NME2	NME1-NME2 readthrough	5.01068e-05	4.46444e-05	23.5709
230	Purine metabolism	PREDICTED: Sus scrofa similar to DNA-directed RNA polymerases I and III subunit RPAC2 (RNA polymerases I and III subunit AC2) (DNA-directed RNA polymerase I subunit D) (DNA-directed RNA polymerase I 16 kDa polypeptide) (RPA16) (RPC16) (hRPA19) (AC19) (LOC	LOC100153350	NM_015972.2	51082	POLR1D	polymerase (RNA) I polypeptide D, 16kDa	5.01068e-05	4.46444e-05	23.5709
230	Purine metabolism	Sus scrofa nudix (nucleoside diphosphate linked moiety X)-type motif 2 (NUDT2), mRNA	NUDT2	NM_001161.3	318	NUDT2	nudix (nucleoside diphosphate linked moiety X)-type motif 2	5.01068e-05	4.46444e-05	23.5709
230	Purine metabolism	Sus scrofa mRNA, clone:OVRM10209D07, expressed in ovary	ATIC	NM_004044.6	471	ATIC	5-aminoimidazole-4-carboxamide ribonucleotide formyltransferase/IMP cyclohydrolase	5.01068e-05	4.46444e-05	23.5709
190	Oxidative phosphorylation	Sus scrofa ATP synthase H+-transporting mitochondrial F1 complex O subunit (LOC733678), nuclear gene encoding mitochondrial protein, mRNA	LOC733678	NM_001697.2	539	ATP5O	ATP synthase, H+ transporting, mitochondrial F1 complex, O subunit	9.14766e-05	5.6767e-05	20.2627
190	Oxidative phosphorylation	Sus scrofa cytochrome c oxidase subunit VIIc (COX7C), nuclear gene encoding mitochondrial protein, mRNA	COX7C	NM_001867.2	1350	COX7C	cytochrome c oxidase subunit VIIc	9.14766e-05	5.6767e-05	20.2627
190	Oxidative phosphorylation	PREDICTED: Sus scrofa similar to ATP synthase, H+ transporting, mitochondrial F1 complex, alpha subunit 1, cardiac muscle (LOC100157880), mRNA	ATP5A1	AK289457.1	498	ATP5A1	ATP synthase, H+ transporting, mitochondrial F1 complex, alpha subunit 1, cardiac muscle	9.14766e-05	5.6767e-05	20.2627
190	Oxidative phosphorylation	PREDICTED: Sus scrofa similar to Cytochrome c oxidase copper chaperone (Dopuin) (LOC100156799), mRNA	LOC100156799	BC108317.1	10063	COX17	COX17 cytochrome c oxidase assembly homolog (S. cerevisiae)	9.14766e-05	5.6767e-05	20.2627
190	Oxidative phosphorylation	1139821 MARC 4PIG Sus scrofa cDNA 3', mRNA sequence	COX7C					9.14766e-05	5.6767e-05	20.2627
190	Oxidative phosphorylation	EST0132-1 Swine Lambda TriplEx2 Library Sus scrofa cDNA clone 5-6 3' similar to ATP synthase,mitochondrial F1 complex,O subunit (ATP5O), mRNA sequence	LOC733678					9.14766e-05	5.6767e-05	20.2627
3050	Proteasome	Sus scrofa proteasome (prosome, macropain) subunit, beta type, 7 (PSMB7), mRNA	PSMB7	AK223356.1	5695	PSMB7	proteasome (prosome, macropain) subunit, beta type, 7	0.000134644	6.34581e-05	37.6622
3050	Proteasome	PREDICTED: Sus scrofa similar to Proteasome (prosome, macropain) subunit, beta type, 4 (LOC100153923), mRNA	LOC100153923	BC008314.2	5692	PSMB4	proteasome (prosome, macropain) subunit, beta type, 4	0.000134644	6.34581e-05	37.6622
3050	Proteasome	PREDICTED: Sus scrofa similar to P26s4 (LOC100155274), mRNA	LOC100155274	NM_002802.2	5700	PSMC1	proteasome (prosome, macropain) 26S subunit, ATPase, 1	0.000134644	6.34581e-05	37.6622
3050	Proteasome	Sus scrofa mRNA, clone:THY010107F05, expressed in thymus	LOC100153923	BC008314.2	5692	PSMB4	proteasome (prosome, macropain) subunit, beta type, 4	0.000134644	6.34581e-05	37.6622
240	Pyrimidine metabolism	Sus scrofa mRNA for c-myc transcription factor, complete cds	NME2	BC107894.1	654364	NME1-NME2	NME1-NME2 readthrough	0.000196198	7.39746e-05	33.3166
240	Pyrimidine metabolism	PREDICTED: Sus scrofa similar to DNA-directed RNA polymerases I and III subunit RPAC2 (RNA polymerases I and III subunit AC2) (DNA-directed RNA polymerase I subunit D) (DNA-directed RNA polymerase I 16 kDa polypeptide) (RPA16) (RPC16) (hRPA19) (AC19) (LOC	LOC100153350	NM_015972.2	51082	POLR1D	polymerase (RNA) I polypeptide D, 16kDa	0.000196198	7.39746e-05	33.3166
240	Pyrimidine metabolism	Sus scrofa nudix (nucleoside diphosphate linked moiety X)-type motif 2 (NUDT2), mRNA	NUDT2	NM_001161.3	318	NUDT2	nudix (nucleoside diphosphate linked moiety X)-type motif 2	0.000196198	7.39746e-05	33.3166
5010	Alzheimer's disease	Sus scrofa ATP synthase H+-transporting mitochondrial F1 complex O subunit (LOC733678), nuclear gene encoding mitochondrial protein, mRNA	LOC733678	NM_001697.2	539	ATP5O	ATP synthase, H+ transporting, mitochondrial F1 complex, O subunit	0.000361812	0.000113682	14.2589
5010	Alzheimer's disease	Sus scrofa mRNA, clone:OVRM10005H07, expressed in ovary	LOC100154978	NM_016022.2	51107	APH1A	anterior pharynx defective 1 homolog A (C. elegans)	0.000361812	0.000113682	14.2589
5010	Alzheimer's disease	Sus scrofa cytochrome c oxidase subunit VIIc (COX7C), nuclear gene encoding mitochondrial protein, mRNA	COX7C	NM_001867.2	1350	COX7C	cytochrome c oxidase subunit VIIc	0.000361812	0.000113682	14.2589
5010	Alzheimer's disease	PREDICTED: Sus scrofa similar to ATP synthase, H+ transporting, mitochondrial F1 complex, alpha subunit 1, cardiac muscle (LOC100157880), mRNA	ATP5A1	AK289457.1	498	ATP5A1	ATP synthase, H+ transporting, mitochondrial F1 complex, alpha subunit 1, cardiac muscle	0.000361812	0.000113682	14.2589
5010	Alzheimer's disease	PREDICTED: Sus scrofa similar to anterior pharynx defective 1a homolog (C. elegans) (LOC100154978), mRNA	LOC100154978	NM_001077628.1	51107	APH1A	anterior pharynx defective 1 homolog A (C. elegans)	0.000361812	0.000113682	14.2589
5010	Alzheimer's disease	1139821 MARC 4PIG Sus scrofa cDNA 3', mRNA sequence	COX7C					0.000361812	0.000113682	14.2589
5010	Alzheimer's disease	EST0132-1 Swine Lambda TriplEx2 Library Sus scrofa cDNA clone 5-6 3' similar to ATP synthase,mitochondrial F1 complex,O subunit (ATP5O), mRNA sequence	LOC733678					0.000361812	0.000113682	14.2589
51	Fructose and mannose metabolism	PREDICTED: Sus scrofa similar to Phosphomannomutase 1 (PMM 1) (PMMH-22) (LOC100151790), mRNA	LOC100151790	NM_002676.2	5372	PMM1	phosphomannomutase 1	0.00180206	0.000415183	44.4221
51	Fructose and mannose metabolism	Sus scrofa aldose reductase (ALR2), mRNA	ALR2	AK313439.1	231	AKR1B1	aldo-keto reductase family 1, member B1 (aldose reductase)	0.00180206	0.000415183	44.4221
5012	Parkinson's disease	Sus scrofa ATP synthase H+-transporting mitochondrial F1 complex O subunit (LOC733678), nuclear gene encoding mitochondrial protein, mRNA	LOC733678	NM_001697.2	539	ATP5O	ATP synthase, H+ transporting, mitochondrial F1 complex, O subunit	0.00260947	0.000523001	13.9715
5012	Parkinson's disease	Sus scrofa cytochrome c oxidase subunit VIIc (COX7C), nuclear gene encoding mitochondrial protein, mRNA	COX7C	NM_001867.2	1350	COX7C	cytochrome c oxidase subunit VIIc	0.00260947	0.000523001	13.9715
5012	Parkinson's disease	PREDICTED: Sus scrofa similar to ATP synthase, H+ transporting, mitochondrial F1 complex, alpha subunit 1, cardiac muscle (LOC100157880), mRNA	ATP5A1	AK289457.1	498	ATP5A1	ATP synthase, H+ transporting, mitochondrial F1 complex, alpha subunit 1, cardiac muscle	0.00260947	0.000523001	13.9715
5012	Parkinson's disease	1139821 MARC 4PIG Sus scrofa cDNA 3', mRNA sequence	COX7C					0.00260947	0.000523001	13.9715
5012	Parkinson's disease	EST0132-1 Swine Lambda TriplEx2 Library Sus scrofa cDNA clone 5-6 3' similar to ATP synthase,mitochondrial F1 complex,O subunit (ATP5O), mRNA sequence	LOC733678					0.00260947	0.000523001	13.9715
5200	Pathways in cancer	Sus scrofa mRNA, clone:OVRM10183D03, expressed in ovary	TGFB3	NM_003239.2	7043	TGFB3	transforming growth factor, beta 3	0.00271032	0.00053453	8.36938
5200	Pathways in cancer	PREDICTED: Sus scrofa heat shock 90kD protein 1, beta (HSPCB), mRNA	HSPCB	AK297367.1	3326	HSP90AB1	heat shock protein 90kDa alpha (cytosolic), class B member 1	0.00271032	0.00053453	8.36938
5200	Pathways in cancer	Sus scrofa heat shock protein 90kDa beta (Grp94), member 1 (HSP90B1), mRNA	HSP90B1	NM_003299.1	7184	HSP90B1	heat shock protein 90kDa beta (Grp94), member 1	0.00271032	0.00053453	8.36938
5200	Pathways in cancer	Sus scrofa putative inhibitor of apoptosis (PIAP), mRNA	PIAP	NM_182962.1	330	BIRC3	baculoviral IAP repeat-containing 3	0.00271032	0.00053453	8.36938
5200	Pathways in cancer	Sus scrofa transforming growth factor, beta 3 (TGFB3), mRNA	TGFB3	NM_003239.2	7043	TGFB3	transforming growth factor, beta 3	0.00271032	0.00053453	8.36938
640	Propanoate metabolism	Sus scrofa lactate dehydrogenase B (LDHB), mRNA	LDHB	NM_002300.5	3945	LDHB	lactate dehydrogenase B	0.00311395	0.0005772	33.9698
640	Propanoate metabolism	Sus scrofa propionyl Coenzyme A carboxylase, beta polypeptide (PCCB), nuclear gene encoding mitochondrial protein, mRNA	PCCB	AK225215.1	5096	PCCB	propionyl Coenzyme A carboxylase, beta polypeptide	0.00311395	0.0005772	33.9698
5016	Huntington's disease	Sus scrofa ATP synthase H+-transporting mitochondrial F1 complex O subunit (LOC733678), nuclear gene encoding mitochondrial protein, mRNA	LOC733678	NM_001697.2	539	ATP5O	ATP synthase, H+ transporting, mitochondrial F1 complex, O subunit	0.00370271	0.000630979	12.3747
5016	Huntington's disease	Sus scrofa cytochrome c oxidase subunit VIIc (COX7C), nuclear gene encoding mitochondrial protein, mRNA	COX7C	NM_001867.2	1350	COX7C	cytochrome c oxidase subunit VIIc	0.00370271	0.000630979	12.3747
5016	Huntington's disease	PREDICTED: Sus scrofa similar to ATP synthase, H+ transporting, mitochondrial F1 complex, alpha subunit 1, cardiac muscle (LOC100157880), mRNA	ATP5A1	AK289457.1	498	ATP5A1	ATP synthase, H+ transporting, mitochondrial F1 complex, alpha subunit 1, cardiac muscle	0.00370271	0.000630979	12.3747
5016	Huntington's disease	1139821 MARC 4PIG Sus scrofa cDNA 3', mRNA sequence	COX7C					0.00370271	0.000630979	12.3747
5016	Huntington's disease	EST0132-1 Swine Lambda TriplEx2 Library Sus scrofa cDNA clone 5-6 3' similar to ATP synthase,mitochondrial F1 complex,O subunit (ATP5O), mRNA sequence	LOC733678					0.00370271	0.000630979	12.3747
620	Pyruvate metabolism	Sus scrofa lactate dehydrogenase B (LDHB), mRNA	LDHB	NM_002300.5	3945	LDHB	lactate dehydrogenase B	0.0043212	0.000678862	28.8744
620	Pyruvate metabolism	Sus scrofa aldose reductase (ALR2), mRNA	ALR2	AK313439.1	231	AKR1B1	aldo-keto reductase family 1, member B1 (aldose reductase)	0.0043212	0.000678862	28.8744
940	Phenylpropanoid biosynthesis	Sus scrofa peroxiredoxin 6 (PRDX6), mRNA	PRDX6	AK289352.1	9588	PRDX6	peroxiredoxin 6	0.00692656	0.00100446	288.744
3010	Ribosome	Sus scrofa ribosomal protein SA (RPSA), mRNA	RPSA	BC005391.1	3921	RPSA	ribosomal protein SA	0.0145816	0.00176253	15.6078
3010	Ribosome	Sus scrofa ribosomal protein S20 (RPS20), mRNA	RPS20	NM_001023.3	6224	RPS20	ribosomal protein S20	0.0145816	0.00176253	15.6078
3010	Ribosome	1103217 MARC 4PIG Sus scrofa cDNA 3', mRNA sequence	RPS20					0.0145816	0.00176253	15.6078
960	Alkaloid biosynthesis II	Sus scrofa peroxiredoxin 6 (PRDX6), mRNA	PRDX6	AK289352.1	9588	PRDX6	peroxiredoxin 6	0.0207087	0.00220882	96.2479
680	Methane metabolism	Sus scrofa peroxiredoxin 6 (PRDX6), mRNA	PRDX6	AK289352.1	9588	PRDX6	peroxiredoxin 6	0.0207087	0.00220882	96.2479
4110	Cell cycle	Sus scrofa mRNA, clone:OVRM10183D03, expressed in ovary	TGFB3	NM_003239.2	7043	TGFB3	transforming growth factor, beta 3	0.0231457	0.00235846	12.287
4110	Cell cycle	PREDICTED: Sus scrofa tyrosine 3-monooxygenase/tryptophan 5-monooxygenase activation protein, zeta polypeptide (YWHAZ), mRNA	YWHAZ	NM_145690.2	7534	YWHAZ	tyrosine 3-monooxygenase/tryptophan 5-monooxygenase activation protein, zeta polypeptide	0.0231457	0.00235846	12.287
4110	Cell cycle	Sus scrofa transforming growth factor, beta 3 (TGFB3), mRNA	TGFB3	NM_003239.2	7043	TGFB3	transforming growth factor, beta 3	0.0231457	0.00235846	12.287
5215	Prostate cancer	PREDICTED: Sus scrofa heat shock 90kD protein 1, beta (HSPCB), mRNA	HSPCB	AK297367.1	3326	HSP90AB1	heat shock protein 90kDa alpha (cytosolic), class B member 1	0.0240983	0.00241338	12.031
5215	Prostate cancer	Sus scrofa heat shock protein 90kDa beta (Grp94), member 1 (HSP90B1), mRNA	HSP90B1	NM_003299.1	7184	HSP90B1	heat shock protein 90kDa beta (Grp94), member 1	0.0240983	0.00241338	12.031
4612	Antigen processing and presentation	PREDICTED: Sus scrofa heat shock 90kD protein 1, beta (HSPCB), mRNA	HSPCB	AK297367.1	3326	HSP90AB1	heat shock protein 90kDa alpha (cytosolic), class B member 1	0.0250679	0.00246738	11.7855
4612	Antigen processing and presentation	Sus scrofa mRNA, clone:LVR010036C01, expressed in liver	CTSB	AK075393.1	1508	CTSB	cathepsin B	0.0250679	0.00246738	11.7855
40	Pentose and glucuronate interconversions	Sus scrofa aldose reductase (ALR2), mRNA	ALR2	AK313439.1	231	AKR1B1	aldo-keto reductase family 1, member B1 (aldose reductase)	0.0275645	0.00259824	72.1859
670	One carbon pool by folate	Sus scrofa mRNA, clone:OVRM10209D07, expressed in ovary	ATIC	NM_004044.6	471	ATIC	5-aminoimidazole-4-carboxamide ribonucleotide formyltransferase/IMP cyclohydrolase	0.0412057	0.00354207	48.1239
3020	RNA polymerase	PREDICTED: Sus scrofa similar to DNA-directed RNA polymerases I and III subunit RPAC2 (RNA polymerases I and III subunit AC2) (DNA-directed RNA polymerase I subunit D) (DNA-directed RNA polymerase I 16 kDa polypeptide) (RPA16) (RPC16) (hRPA19) (AC19) (LOC	LOC100153350	NM_015972.2	51082	POLR1D	polymerase (RNA) I polypeptide D, 16kDa	0.0547538	0.00432818	36.0929
52	Galactose metabolism	Sus scrofa aldose reductase (ALR2), mRNA	ALR2	AK313439.1	231	AKR1B1	aldo-keto reductase family 1, member B1 (aldose reductase)	0.0547538	0.00432818	36.0929
360	Phenylalanine metabolism	Sus scrofa peroxiredoxin 6 (PRDX6), mRNA	PRDX6	AK289352.1	9588	PRDX6	peroxiredoxin 6	0.0614932	0.00467395	32.0826
5322	Systemic lupus erythematosus	Sus scrofa H2A histone family, member Z (H2AFZ), mRNA	H2AFZ	NM_002106.3	3015	H2AFZ	H2A histone family, member Z	0.0628857	0.0047421	7.21859
5322	Systemic lupus erythematosus	PREDICTED: Sus scrofa similar to Core histone macro-H2A.2 (Histone macroH2A2) (mH2A2) (LOC100152359), mRNA	LOC100152359	NM_018649.2	55506	H2AFY2	H2A histone family, member Y2	0.0628857	0.0047421	7.21859
4010	MAPK signaling pathway	Sus scrofa mRNA, clone:OVRM10183D03, expressed in ovary	TGFB3	NM_003239.2	7043	TGFB3	transforming growth factor, beta 3	0.081129	0.00569899	6.27703
4010	MAPK signaling pathway	Sus scrofa transforming growth factor, beta 3 (TGFB3), mRNA	TGFB3	NM_003239.2	7043	TGFB3	transforming growth factor, beta 3	0.081129	0.00569899	6.27703
4010	MAPK signaling pathway	Sus scrofa stathmin-1 (LOC494463), mRNA	LOC494463	BC082228.1	3925	STMN1	stathmin 1	0.081129	0.00569899	6.27703
4330	Notch signaling pathway	Sus scrofa mRNA, clone:OVRM10005H07, expressed in ovary	LOC100154978	NM_016022.2	51107	APH1A	anterior pharynx defective 1 homolog A (C. elegans)	0.0882208	0.00603651	22.211
4330	Notch signaling pathway	PREDICTED: Sus scrofa similar to anterior pharynx defective 1a homolog (C. elegans) (LOC100154978), mRNA	LOC100154978	NM_001077628.1	51107	APH1A	anterior pharynx defective 1 homolog A (C. elegans)	0.0882208	0.00603651	22.211
4150	mTOR signaling pathway	Sus scrofa mRNA, clone:OVR010011G07, expressed in ovary	EIF4E2	AB209519.1	9470	EIF4E2	eukaryotic translation initiation factor 4E family member 2	0.101448	0.00662144	19.2496
4150	mTOR signaling pathway	Sus scrofa eukaryotic translation initiation factor 4E family member 2 (EIF4E2), mRNA	EIF4E2	BC021690.1	9470	EIF4E2	eukaryotic translation initiation factor 4E family member 2	0.101448	0.00662144	19.2496
520	Amino sugar and nucleotide sugar metabolism	PREDICTED: Sus scrofa similar to Phosphomannomutase 1 (PMM 1) (PMMH-22) (LOC100151790), mRNA	LOC100151790	NM_002676.2	5372	PMM1	phosphomannomutase 1	0.108027	0.00689276	18.0465
270	Cysteine and methionine metabolism	Sus scrofa lactate dehydrogenase B (LDHB), mRNA	LDHB	NM_002300.5	3945	LDHB	lactate dehydrogenase B	0.114584	0.00715132	16.9849
561	Glycerolipid metabolism	Sus scrofa aldose reductase (ALR2), mRNA	ALR2	AK313439.1	231	AKR1B1	aldo-keto reductase family 1, member B1 (aldose reductase)	0.127631	0.00763355	15.197
280	Valine, leucine and isoleucine degradation	Sus scrofa propionyl Coenzyme A carboxylase, beta polypeptide (PCCB), nuclear gene encoding mitochondrial protein, mRNA	PCCB	AK225215.1	5096	PCCB	propionyl Coenzyme A carboxylase, beta polypeptide	0.147035	0.00828071	13.1247
10	Glycolysis / Gluconeogenesis	Sus scrofa lactate dehydrogenase B (LDHB), mRNA	LDHB	NM_002300.5	3945	LDHB	lactate dehydrogenase B	0.15986	0.00866853	12.031
1061	Biosynthesis of phenylpropanoids	Sus scrofa peroxiredoxin 6 (PRDX6), mRNA	PRDX6	AK289352.1	9588	PRDX6	peroxiredoxin 6	0.172598	0.0090262	11.1055
5211	Renal cell carcinoma	Sus scrofa mRNA, clone:OVRM10183D03, expressed in ovary	TGFB3	NM_003239.2	7043	TGFB3	transforming growth factor, beta 3	0.185248	0.00935709	10.3123
5211	Renal cell carcinoma	Sus scrofa transforming growth factor, beta 3 (TGFB3), mRNA	TGFB3	NM_003239.2	7043	TGFB3	transforming growth factor, beta 3	0.185248	0.00935709	10.3123
4512	ECM-receptor interaction	PREDICTED: Sus scrofa similar to syndecan 2 (LOC100152754), mRNA	LOC100152754	NM_002998.3	6383	SDC2	syndecan 2	0.197812	0.00966409	9.62479
1065	Biosynthesis of alkaloids derived from histidine and purine	Sus scrofa mRNA, clone:OVRM10209D07, expressed in ovary	ATIC	NM_004044.6	471	ATIC	5-aminoimidazole-4-carboxamide ribonucleotide formyltransferase/IMP cyclohydrolase	0.216498	0.0100852	8.74981
4260	Cardiac muscle contraction	Sus scrofa cytochrome c oxidase subunit VIIc (COX7C), nuclear gene encoding mitochondrial protein, mRNA	COX7C	NM_001867.2	1350	COX7C	cytochrome c oxidase subunit VIIc	0.222684	0.0102161	8.49246
4260	Cardiac muscle contraction	1139821 MARC 4PIG Sus scrofa cDNA 3', mRNA sequence	COX7C					0.222684	0.0102161	8.49246
5210	Colorectal cancer	Sus scrofa mRNA, clone:OVRM10183D03, expressed in ovary	TGFB3	NM_003239.2	7043	TGFB3	transforming growth factor, beta 3	0.234992	0.0104651	8.02066
5220	Chronic myeloid leukemia	Sus scrofa mRNA, clone:OVRM10183D03, expressed in ovary	TGFB3	NM_003239.2	7043	TGFB3	transforming growth factor, beta 3	0.234992	0.0104651	8.02066
5210	Colorectal cancer	Sus scrofa transforming growth factor, beta 3 (TGFB3), mRNA	TGFB3	NM_003239.2	7043	TGFB3	transforming growth factor, beta 3	0.234992	0.0104651	8.02066
5220	Chronic myeloid leukemia	Sus scrofa transforming growth factor, beta 3 (TGFB3), mRNA	TGFB3	NM_003239.2	7043	TGFB3	transforming growth factor, beta 3	0.234992	0.0104651	8.02066
5212	Pancreatic cancer	Sus scrofa mRNA, clone:OVRM10183D03, expressed in ovary	TGFB3	NM_003239.2	7043	TGFB3	transforming growth factor, beta 3	0.247216	0.0106983	7.59852
5222	Small cell lung cancer	Sus scrofa putative inhibitor of apoptosis (PIAP), mRNA	PIAP	NM_182962.1	330	BIRC3	baculoviral IAP repeat-containing 3	0.247216	0.0106983	7.59852
5212	Pancreatic cancer	Sus scrofa transforming growth factor, beta 3 (TGFB3), mRNA	TGFB3	NM_003239.2	7043	TGFB3	transforming growth factor, beta 3	0.247216	0.0106983	7.59852
1070	Biosynthesis of plant hormones	Sus scrofa mRNA, clone:OVRM10209D07, expressed in ovary	ATIC	NM_004044.6	471	ATIC	5-aminoimidazole-4-carboxamide ribonucleotide formyltransferase/IMP cyclohydrolase	0.253296	0.0108095	7.40368
4350	TGF-beta signaling pathway	Sus scrofa mRNA, clone:OVRM10183D03, expressed in ovary	TGFB3	NM_003239.2	7043	TGFB3	transforming growth factor, beta 3	0.265395	0.0110218	7.04253
4120	Ubiquitin mediated proteolysis	Sus scrofa putative inhibitor of apoptosis (PIAP), mRNA	PIAP	NM_182962.1	330	BIRC3	baculoviral IAP repeat-containing 3	0.265395	0.0110218	7.04253
4350	TGF-beta signaling pathway	Sus scrofa transforming growth factor, beta 3 (TGFB3), mRNA	TGFB3	NM_003239.2	7043	TGFB3	transforming growth factor, beta 3	0.265395	0.0110218	7.04253
4530	Tight junction	PREDICTED: Sus scrofa similar to Ras-related protein Rab-13 (Cell growth-inhibiting gene 4 protein) (LOC100154707), mRNA	LOC100154707	AK291580.1	5872	RAB13	RAB13, member RAS oncogene family	0.271414	0.0111233	6.87485
4210	Apoptosis	Sus scrofa putative inhibitor of apoptosis (PIAP), mRNA	PIAP	NM_182962.1	330	BIRC3	baculoviral IAP repeat-containing 3	0.295282	0.0115939	6.27703
3320	PPAR signaling pathway	Sus scrofa partial mRNA for heart fatty acid-binding protein (FABP3 gene)	FABP3	AK314122.1	2170	FABP3	fatty acid binding protein 3, muscle and heart (mammary-derived growth inhibitor)	0.301198	0.0117045	6.14348
3320	PPAR signaling pathway	Sus scrofa fatty acid binding protein 3, muscle and heart (mammary-derived growth inhibitor) (FABP3), mRNA	FABP3	NM_004102.3	2170	FABP3	fatty acid binding protein 3, muscle and heart (mammary-derived growth inhibitor)	0.301198	0.0117045	6.14348
4910	Insulin signaling pathway	Sus scrofa mRNA, clone:OVR010011G07, expressed in ovary	EIF4E2	AB209519.1	9470	EIF4E2	eukaryotic translation initiation factor 4E family member 2	0.318824	0.012021	5.77487
4910	Insulin signaling pathway	Sus scrofa eukaryotic translation initiation factor 4E family member 2 (EIF4E2), mRNA	EIF4E2	BC021690.1	9470	EIF4E2	eukaryotic translation initiation factor 4E family member 2	0.318824	0.012021	5.77487
4142	Lysosome	Sus scrofa mRNA, clone:LVR010036C01, expressed in liver	CTSB	AK075393.1	1508	CTSB	cathepsin B	0.318824	0.012021	5.77487
4722	Neurotrophin signaling pathway	PREDICTED: Sus scrofa tyrosine 3-monooxygenase/tryptophan 5-monooxygenase activation protein, zeta polypeptide (YWHAZ), mRNA	YWHAZ	NM_145690.2	7534	YWHAZ	tyrosine 3-monooxygenase/tryptophan 5-monooxygenase activation protein, zeta polypeptide	0.33627	0.0124302	5.44799
4514	Cell adhesion molecules (CAMs)	PREDICTED: Sus scrofa similar to syndecan 2 (LOC100152754), mRNA	LOC100152754	NM_002998.3	6383	SDC2	syndecan 2	0.393143	0.0142926	4.58323
4510	Focal adhesion	Sus scrofa putative inhibitor of apoptosis (PIAP), mRNA	PIAP	NM_182962.1	330	BIRC3	baculoviral IAP repeat-containing 3	0.469554	0.0170232	3.74992

## Sheet: LR4 vs LR3-up regulation
path_id	path_name	pig_Description	pig_Gene symbol	human_Genebank	human_Gene ID	human_Gene	human_Gene des	pvalue	FDR	enrichment
1070	Biosynthesis of plant hormones	Sus scrofa enolase 3 (beta, muscle) (ENO3), mRNA	ENO3	NM_053013.2	2027	ENO3	enolase 3 (beta, muscle)	1.48444e-06	2.67877e-06	56.3402
1070	Biosynthesis of plant hormones	Sus scrofa phosphoglycerate kinase 1 (PGK1), mRNA	PGK1	NM_000291.3	5230	PGK1	phosphoglycerate kinase 1	1.48444e-06	2.67877e-06	56.3402
1070	Biosynthesis of plant hormones	Sus scrofa adenosine monophosphate deaminase 1 (AMPD1), mRNA	AMPD1	BC141600.1	270	AMPD1	adenosine monophosphate deaminase 1	1.48444e-06	2.67877e-06	56.3402
1070	Biosynthesis of plant hormones	Sus scrofa phosphoglycerate mutase 2 (PGAM2), mRNA	PGAM2	NM_000290.3	5224	PGAM2	phosphoglycerate mutase 2 (muscle)	1.48444e-06	2.67877e-06	56.3402
1100	Metabolic pathways	Sus scrofa enolase 3 (beta, muscle) (ENO3), mRNA	ENO3	NM_053013.2	2027	ENO3	enolase 3 (beta, muscle)	1.85227e-05	9.89759e-06	9.22115
1100	Metabolic pathways	Sus scrofa NDUFV2 (NUDFV2), mRNA	NUDFV2	AK291865.1	4729	NDUFV2	NADH dehydrogenase (ubiquinone) flavoprotein 2, 24kDa	1.85227e-05	9.89759e-06	9.22115
1100	Metabolic pathways	Sus scrofa phosphoglycerate kinase 1 (PGK1), mRNA	PGK1	NM_000291.3	5230	PGK1	phosphoglycerate kinase 1	1.85227e-05	9.89759e-06	9.22115
1100	Metabolic pathways	Sus scrofa adenosine monophosphate deaminase 1 (AMPD1), mRNA	AMPD1	BC141600.1	270	AMPD1	adenosine monophosphate deaminase 1	1.85227e-05	9.89759e-06	9.22115
1100	Metabolic pathways	Sus scrofa creatine kinase, muscle (CKM), mRNA	CKM	AK129878.1	1158	CKM	creatine kinase, muscle	1.85227e-05	9.89759e-06	9.22115
1100	Metabolic pathways	PREDICTED: Sus scrofa similar to ATP synthase subunit beta, mitochondrial (LOC100157156), mRNA	LOC100157156	CR600201.1	506	ATP5B	ATP synthase, H+ transporting, mitochondrial F1 complex, beta polypeptide	1.85227e-05	9.89759e-06	9.22115
1100	Metabolic pathways	Sus scrofa phosphoglycerate mutase 2 (PGAM2), mRNA	PGAM2	NM_000290.3	5224	PGAM2	phosphoglycerate mutase 2 (muscle)	1.85227e-05	9.89759e-06	9.22115
10	Glycolysis / Gluconeogenesis	Sus scrofa enolase 3 (beta, muscle) (ENO3), mRNA	ENO3	NM_053013.2	2027	ENO3	enolase 3 (beta, muscle)	2.2072e-05	1.02859e-05	68.6646
10	Glycolysis / Gluconeogenesis	Sus scrofa phosphoglycerate kinase 1 (PGK1), mRNA	PGK1	NM_000291.3	5230	PGK1	phosphoglycerate kinase 1	2.2072e-05	1.02859e-05	68.6646
10	Glycolysis / Gluconeogenesis	Sus scrofa phosphoglycerate mutase 2 (PGAM2), mRNA	PGAM2	NM_000290.3	5224	PGAM2	phosphoglycerate mutase 2 (muscle)	2.2072e-05	1.02859e-05	68.6646
1061	Biosynthesis of phenylpropanoids	Sus scrofa enolase 3 (beta, muscle) (ENO3), mRNA	ENO3	NM_053013.2	2027	ENO3	enolase 3 (beta, muscle)	2.82817e-05	1.07701e-05	63.3827
1061	Biosynthesis of phenylpropanoids	Sus scrofa phosphoglycerate kinase 1 (PGK1), mRNA	PGK1	NM_000291.3	5230	PGK1	phosphoglycerate kinase 1	2.82817e-05	1.07701e-05	63.3827
1061	Biosynthesis of phenylpropanoids	Sus scrofa phosphoglycerate mutase 2 (PGAM2), mRNA	PGAM2	NM_000290.3	5224	PGAM2	phosphoglycerate mutase 2 (muscle)	2.82817e-05	1.07701e-05	63.3827
1063	Biosynthesis of alkaloids derived from shikimate pathway	Sus scrofa enolase 3 (beta, muscle) (ENO3), mRNA	ENO3	NM_053013.2	2027	ENO3	enolase 3 (beta, muscle)	3.95962e-05	1.13109e-05	56.8259
1063	Biosynthesis of alkaloids derived from shikimate pathway	Sus scrofa phosphoglycerate kinase 1 (PGK1), mRNA	PGK1	NM_000291.3	5230	PGK1	phosphoglycerate kinase 1	3.95962e-05	1.13109e-05	56.8259
1063	Biosynthesis of alkaloids derived from shikimate pathway	Sus scrofa phosphoglycerate mutase 2 (PGAM2), mRNA	PGAM2	NM_000290.3	5224	PGAM2	phosphoglycerate mutase 2 (muscle)	3.95962e-05	1.13109e-05	56.8259
1064	Biosynthesis of alkaloids derived from ornithine, lysine and nicotinic acid	Sus scrofa enolase 3 (beta, muscle) (ENO3), mRNA	ENO3	NM_053013.2	2027	ENO3	enolase 3 (beta, muscle)	4.39401e-05	1.1453e-05	54.9317
1064	Biosynthesis of alkaloids derived from ornithine, lysine and nicotinic acid	Sus scrofa phosphoglycerate kinase 1 (PGK1), mRNA	PGK1	NM_000291.3	5230	PGK1	phosphoglycerate kinase 1	4.39401e-05	1.1453e-05	54.9317
1064	Biosynthesis of alkaloids derived from ornithine, lysine and nicotinic acid	Sus scrofa phosphoglycerate mutase 2 (PGAM2), mRNA	PGAM2	NM_000290.3	5224	PGAM2	phosphoglycerate mutase 2 (muscle)	4.39401e-05	1.1453e-05	54.9317
1062	Biosynthesis of terpenoids and steroids	Sus scrofa enolase 3 (beta, muscle) (ENO3), mRNA	ENO3	NM_053013.2	2027	ENO3	enolase 3 (beta, muscle)	5.35449e-05	1.16933e-05	51.4985
1062	Biosynthesis of terpenoids and steroids	Sus scrofa phosphoglycerate kinase 1 (PGK1), mRNA	PGK1	NM_000291.3	5230	PGK1	phosphoglycerate kinase 1	5.35449e-05	1.16933e-05	51.4985
1062	Biosynthesis of terpenoids and steroids	Sus scrofa phosphoglycerate mutase 2 (PGAM2), mRNA	PGAM2	NM_000290.3	5224	PGAM2	phosphoglycerate mutase 2 (muscle)	5.35449e-05	1.16933e-05	51.4985
1066	Biosynthesis of alkaloids derived from terpenoid and polyketide	Sus scrofa enolase 3 (beta, muscle) (ENO3), mRNA	ENO3	NM_053013.2	2027	ENO3	enolase 3 (beta, muscle)	5.8825e-05	1.17948e-05	49.9379
1065	Biosynthesis of alkaloids derived from histidine and purine	Sus scrofa enolase 3 (beta, muscle) (ENO3), mRNA	ENO3	NM_053013.2	2027	ENO3	enolase 3 (beta, muscle)	5.8825e-05	1.17948e-05	49.9379
1066	Biosynthesis of alkaloids derived from terpenoid and polyketide	Sus scrofa phosphoglycerate kinase 1 (PGK1), mRNA	PGK1	NM_000291.3	5230	PGK1	phosphoglycerate kinase 1	5.8825e-05	1.17948e-05	49.9379
1065	Biosynthesis of alkaloids derived from histidine and purine	Sus scrofa phosphoglycerate kinase 1 (PGK1), mRNA	PGK1	NM_000291.3	5230	PGK1	phosphoglycerate kinase 1	5.8825e-05	1.17948e-05	49.9379
1065	Biosynthesis of alkaloids derived from histidine and purine	Sus scrofa phosphoglycerate mutase 2 (PGAM2), mRNA	PGAM2	NM_000290.3	5224	PGAM2	phosphoglycerate mutase 2 (muscle)	5.8825e-05	1.17948e-05	49.9379
1066	Biosynthesis of alkaloids derived from terpenoid and polyketide	Sus scrofa phosphoglycerate mutase 2 (PGAM2), mRNA	PGAM2	NM_000290.3	5224	PGAM2	phosphoglycerate mutase 2 (muscle)	5.8825e-05	1.17948e-05	49.9379
4670	Leukocyte transendothelial migration	PREDICTED: Sus scrofa similar to Actinin, alpha 2 (LOC100157406), mRNA	LOC100157406	NM_001103.2	88	ACTN2	actinin, alpha 2	0.000160999	2.90533e-05	35.825
4670	Leukocyte transendothelial migration	Sus scrofa cadherin 5 (CDH5), mRNA	CDH5	AK300461.1	1003	CDH5	cadherin 5, type 2 (vascular endothelium)	0.000160999	2.90533e-05	35.825
4670	Leukocyte transendothelial migration	Sus scrofa fast skeletal myosin light chain 2 (MYLPF), mRNA	MYLPF	NM_013292.3	29895	MYLPF	myosin light chain, phosphorylatable, fast skeletal muscle	0.000160999	2.90533e-05	35.825
4810	Regulation of actin cytoskeleton	PREDICTED: Sus scrofa similar to Actinin, alpha 2 (LOC100157406), mRNA	LOC100157406	NM_001103.2	88	ACTN2	actinin, alpha 2	0.000690416	0.000105497	21.9727
4810	Regulation of actin cytoskeleton	Sus scrofa epidermal growth factor (EGF), mRNA	EGF	BC113461.1	1950	EGF	epidermal growth factor (beta-urogastrone)	0.000690416	0.000105497	21.9727
4810	Regulation of actin cytoskeleton	Sus scrofa fast skeletal myosin light chain 2 (MYLPF), mRNA	MYLPF	NM_013292.3	29895	MYLPF	myosin light chain, phosphorylatable, fast skeletal muscle	0.000690416	0.000105497	21.9727
4510	Focal adhesion	PREDICTED: Sus scrofa similar to Actinin, alpha 2 (LOC100157406), mRNA	LOC100157406	NM_001103.2	88	ACTN2	actinin, alpha 2	0.000746044	0.000112191	21.402
4510	Focal adhesion	Sus scrofa epidermal growth factor (EGF), mRNA	EGF	BC113461.1	1950	EGF	epidermal growth factor (beta-urogastrone)	0.000746044	0.000112191	21.402
4510	Focal adhesion	Sus scrofa fast skeletal myosin light chain 2 (MYLPF), mRNA	MYLPF	NM_013292.3	29895	MYLPF	myosin light chain, phosphorylatable, fast skeletal muscle	0.000746044	0.000112191	21.402
4010	MAPK signaling pathway	Sus scrofa calcium channel, voltage-dependent, gamma subunit 1 (CACNG1), mRNA	CACNG1	BC113492.1	786	CACNG1	calcium channel, voltage-dependent, gamma subunit 1	0.00125677	0.000174455	17.9125
4010	MAPK signaling pathway	Sus scrofa myocyte enhancer factor 2C protein (MEF2C) mRNA, complete cds	MEF2C	NM_001131005.1	4208	MEF2C	myocyte enhancer factor 2C	0.00125677	0.000174455	17.9125
4010	MAPK signaling pathway	Sus scrofa epidermal growth factor (EGF), mRNA	EGF	BC113461.1	1950	EGF	epidermal growth factor (beta-urogastrone)	0.00125677	0.000174455	17.9125
4260	Cardiac muscle contraction	Sus scrofa calcium channel, voltage-dependent, gamma subunit 1 (CACNG1), mRNA	CACNG1	BC113492.1	786	CACNG1	calcium channel, voltage-dependent, gamma subunit 1	0.00349636	0.000430535	32.3128
4260	Cardiac muscle contraction	Sus scrofa tropomyosin 2 (beta) (TPM2), mRNA	TPM2	NM_213674.1	7169	TPM2	tropomyosin 2 (beta)	0.00349636	0.000430535	32.3128
3010	Ribosome	Sus scrofa ribosomal protein S20 (RPS20), mRNA	RPS20	NM_001023.3	6224	RPS20	ribosomal protein S20	0.00413645	0.00049343	29.6928
3010	Ribosome	Sus scrofa mRNA, clone:OVR010070H08, expressed in ovary	LOC100049695	AK129823.1	6175	RPLP0	ribosomal protein, large, P0	0.00413645	0.00049343	29.6928
3010	Ribosome	1103217 MARC 4PIG Sus scrofa cDNA 3', mRNA sequence	RPS20					0.00413645	0.00049343	29.6928
4530	Tight junction	PREDICTED: Sus scrofa similar to Actinin, alpha 2 (LOC100157406), mRNA	LOC100157406	NM_001103.2	88	ACTN2	actinin, alpha 2	0.0053169	0.000599669	26.158
4530	Tight junction	Sus scrofa fast skeletal myosin light chain 2 (MYLPF), mRNA	MYLPF	NM_013292.3	29895	MYLPF	myosin light chain, phosphorylatable, fast skeletal muscle	0.0053169	0.000599669	26.158
230	Purine metabolism	Sus scrofa adenosine monophosphate deaminase 1 (AMPD1), mRNA	AMPD1	BC141600.1	270	AMPD1	adenosine monophosphate deaminase 1	0.0072039	0.000764701	22.4211
230	Purine metabolism	PREDICTED: Sus scrofa similar to Guanosine monophosphate reductase 2 (LOC100154068), mRNA	LOC100154068	NM_001002000.1	51292	GMPR2	guanosine monophosphate reductase 2	0.0072039	0.000764701	22.4211
190	Oxidative phosphorylation	Sus scrofa NDUFV2 (NUDFV2), mRNA	NUDFV2	AK291865.1	4729	NDUFV2	NADH dehydrogenase (ubiquinone) flavoprotein 2, 24kDa	0.00968729	0.000961558	19.2743
190	Oxidative phosphorylation	PREDICTED: Sus scrofa similar to ATP synthase subunit beta, mitochondrial (LOC100157156), mRNA	LOC100157156	CR600201.1	506	ATP5B	ATP synthase, H+ transporting, mitochondrial F1 complex, beta polypeptide	0.00968729	0.000961558	19.2743
5012	Parkinson's disease	Sus scrofa NDUFV2 (NUDFV2), mRNA	NUDFV2	AK291865.1	4729	NDUFV2	NADH dehydrogenase (ubiquinone) flavoprotein 2, 24kDa	0.0114122	0.0010839	17.7199
5012	Parkinson's disease	PREDICTED: Sus scrofa similar to ATP synthase subunit beta, mitochondrial (LOC100157156), mRNA	LOC100157156	CR600201.1	506	ATP5B	ATP synthase, H+ transporting, mitochondrial F1 complex, beta polypeptide	0.0114122	0.0010839	17.7199
5016	Huntington's disease	Sus scrofa NDUFV2 (NUDFV2), mRNA	NUDFV2	AK291865.1	4729	NDUFV2	NADH dehydrogenase (ubiquinone) flavoprotein 2, 24kDa	0.0144414	0.00130302	15.6948
5016	Huntington's disease	PREDICTED: Sus scrofa similar to ATP synthase subunit beta, mitochondrial (LOC100157156), mRNA	LOC100157156	CR600201.1	506	ATP5B	ATP synthase, H+ transporting, mitochondrial F1 complex, beta polypeptide	0.0144414	0.00130302	15.6948
5010	Alzheimer's disease	Sus scrofa NDUFV2 (NUDFV2), mRNA	NUDFV2	AK291865.1	4729	NDUFV2	NADH dehydrogenase (ubiquinone) flavoprotein 2, 24kDa	0.0191322	0.00164406	13.5634
5010	Alzheimer's disease	PREDICTED: Sus scrofa similar to ATP synthase subunit beta, mitochondrial (LOC100157156), mRNA	LOC100157156	CR600201.1	506	ATP5B	ATP synthase, H+ transporting, mitochondrial F1 complex, beta polypeptide	0.0191322	0.00164406	13.5634
710	Carbon fixation in photosynthetic organisms	Sus scrofa phosphoglycerate kinase 1 (PGK1), mRNA	PGK1	NM_000291.3	5230	PGK1	phosphoglycerate kinase 1	0.0396959	0.00306084	49.9379
4930	Type II diabetes mellitus	Sus scrofa solute carrier family 2 (facilitated glucose transporter), member 4 (SLC2A4), mRNA	SLC2A4	NM_001042.2	6517	SLC2A4	solute carrier family 2 (facilitated glucose transporter), member 4	0.0645556	0.00442798	30.5176
5213	Endometrial cancer	Sus scrofa epidermal growth factor (EGF), mRNA	EGF	BC113461.1	1950	EGF	epidermal growth factor (beta-urogastrone)	0.0716017	0.00476222	27.4659
5219	Bladder cancer	Sus scrofa epidermal growth factor (EGF), mRNA	EGF	BC113461.1	1950	EGF	epidermal growth factor (beta-urogastrone)	0.0751154	0.00492143	26.158
5223	Non-small cell lung cancer	Sus scrofa epidermal growth factor (EGF), mRNA	EGF	BC113461.1	1950	EGF	epidermal growth factor (beta-urogastrone)	0.0751154	0.00492143	26.158
330	Arginine and proline metabolism	Sus scrofa creatine kinase, muscle (CKM), mRNA	CKM	AK129878.1	1158	CKM	creatine kinase, muscle	0.0960665	0.00578023	20.3451
5214	Glioma	Sus scrofa epidermal growth factor (EGF), mRNA	EGF	BC113461.1	1950	EGF	epidermal growth factor (beta-urogastrone)	0.0960665	0.00578023	20.3451
4520	Adherens junction	PREDICTED: Sus scrofa similar to Actinin, alpha 2 (LOC100157406), mRNA	LOC100157406	NM_001103.2	88	ACTN2	actinin, alpha 2	0.103001	0.00603439	18.942
5218	Melanoma	Sus scrofa epidermal growth factor (EGF), mRNA	EGF	BC113461.1	1950	EGF	epidermal growth factor (beta-urogastrone)	0.106458	0.0061562	18.3106
4730	Long-term depression	Sus scrofa ryanodine receptor 1 (RYR1), mRNA	RYR1	NM_001042723.1	6261	RYR1	ryanodine receptor 1 (skeletal)	0.116795	0.00650222	16.646
4012	ErbB signaling pathway	Sus scrofa epidermal growth factor (EGF), mRNA	EGF	BC113461.1	1950	EGF	epidermal growth factor (beta-urogastrone)	0.130492	0.00692286	14.8464
5212	Pancreatic cancer	Sus scrofa epidermal growth factor (EGF), mRNA	EGF	BC113461.1	1950	EGF	epidermal growth factor (beta-urogastrone)	0.133901	0.00702147	14.4557
4540	Gap junction	Sus scrofa epidermal growth factor (EGF), mRNA	EGF	BC113461.1	1950	EGF	epidermal growth factor (beta-urogastrone)	0.137304	0.00711765	14.0851
4920	Adipocytokine signaling pathway	Sus scrofa solute carrier family 2 (facilitated glucose transporter), member 4 (SLC2A4), mRNA	SLC2A4	NM_001042.2	6517	SLC2A4	solute carrier family 2 (facilitated glucose transporter), member 4	0.144091	0.00730308	13.398
4270	Vascular smooth muscle contraction	Sus scrofa receptor (G protein-coupled) activity modifying protein 1 (RAMP1), mRNA	RAMP1	NM_005855.2	10267	RAMP1	receptor (G protein-coupled) activity modifying protein 1	0.147476	0.0073925	13.079
5215	Prostate cancer	Sus scrofa epidermal growth factor (EGF), mRNA	EGF	BC113461.1	1950	EGF	epidermal growth factor (beta-urogastrone)	0.167658	0.00806743	11.4441
4910	Insulin signaling pathway	Sus scrofa solute carrier family 2 (facilitated glucose transporter), member 4 (SLC2A4), mRNA	SLC2A4	NM_001042.2	6517	SLC2A4	solute carrier family 2 (facilitated glucose transporter), member 4	0.174338	0.00827906	10.9863
4514	Cell adhesion molecules (CAMs)	Sus scrofa cadherin 5 (CDH5), mRNA	CDH5	AK300461.1	1003	CDH5	cadherin 5, type 2 (vascular endothelium)	0.21718	0.00985713	8.71932
4020	Calcium signaling pathway	Sus scrofa ryanodine receptor 1 (RYR1), mRNA	RYR1	NM_001042723.1	6261	RYR1	ryanodine receptor 1 (skeletal)	0.249467	0.0109571	7.52489
4144	Endocytosis	Sus scrofa epidermal growth factor (EGF), mRNA	EGF	BC113461.1	1950	EGF	epidermal growth factor (beta-urogastrone)	0.259041	0.0112697	7.22786
5322	Systemic lupus erythematosus	PREDICTED: Sus scrofa similar to Actinin, alpha 2 (LOC100157406), mRNA	LOC100157406	NM_001103.2	88	ACTN2	actinin, alpha 2	0.271727	0.011675	6.86646
4060	Cytokine-cytokine receptor interaction	Sus scrofa epidermal growth factor (EGF), mRNA	EGF	BC113461.1	1950	EGF	epidermal growth factor (beta-urogastrone)	0.333818	0.0140754	5.49317
5200	Pathways in cancer	Sus scrofa epidermal growth factor (EGF), mRNA	EGF	BC113461.1	1950	EGF	epidermal growth factor (beta-urogastrone)	0.44585	0.0187108	3.98056

## Sheet: LR4 vs LR3-down regulation
path_id	path_name	pig_Description	pig_Gene symbol	human_Genebank	human_Gene ID	human_Gene	human_Gene des	pvalue	FDR	enrichment
4512	ECM-receptor interaction	PREDICTED: Sus scrofa similar to Thrombospondin-3 (LOC100155108), mRNA	LOC100155108	NM_007112.3	7059	THBS3	thrombospondin 3	8.50719e-05	0.000165844	44.1608
4512	ECM-receptor interaction	PREDICTED: Sus scrofa collagen type XI alpha 1 (COLL11A1), mRNA	COLL11A1	NM_001854.3	1301	COL11A1	collagen, type XI, alpha 1	8.50719e-05	0.000165844	44.1608
4512	ECM-receptor interaction	BX668018 Sus Scrofa library (scac) Sus scrofa cDNA clone scac0026.p.19 5prim, mRNA sequence	COL5A1					8.50719e-05	0.000165844	44.1608
5200	Pathways in cancer	Sus scrofa TPM3 (TPM3) mRNA, complete cds	TPM3	BC008407.1	7170	TPM3	tropomyosin 3	0.000539416	0.000525783	12.8002
5200	Pathways in cancer	Sus scrofa cyclin-dependent kinase 4 (CDK4), mRNA	CDK4	BC010153.2	1019	CDK4	cyclin-dependent kinase 4	0.000539416	0.000525783	12.8002
5200	Pathways in cancer	PREDICTED: Sus scrofa similar to CDC28 protein kinase 1B (LOC100155110), mRNA	LOC100155110	BC070320.1	1163	CKS1B	CDC28 protein kinase regulatory subunit 1B	0.000539416	0.000525783	12.8002
5200	Pathways in cancer	Sus scrofa gelatinase A (MMP-2), mRNA	MMP-2	NM_004530.4	4313	MMP2	matrix metallopeptidase 2 (gelatinase A, 72kDa gelatinase, 72kDa type IV collagenase)	0.000539416	0.000525783	12.8002
4510	Focal adhesion	PREDICTED: Sus scrofa similar to Thrombospondin-3 (LOC100155108), mRNA	LOC100155108	NM_007112.3	7059	THBS3	thrombospondin 3	0.00142212	0.000723635	17.2055
4510	Focal adhesion	PREDICTED: Sus scrofa collagen type XI alpha 1 (COLL11A1), mRNA	COLL11A1	NM_001854.3	1301	COL11A1	collagen, type XI, alpha 1	0.00142212	0.000723635	17.2055
4510	Focal adhesion	BX668018 Sus Scrofa library (scac) Sus scrofa cDNA clone scac0026.p.19 5prim, mRNA sequence	COL5A1					0.00142212	0.000723635	17.2055
620	Pyruvate metabolism	Sus scrofa lactate dehydrogenase B (LDHB), mRNA	LDHB	NM_002300.5	3945	LDHB	lactate dehydrogenase B	0.00186121	0.000765145	44.1608
620	Pyruvate metabolism	Sus scrofa aldose reductase (ALR2), mRNA	ALR2	AK313439.1	231	AKR1B1	aldo-keto reductase family 1, member B1 (aldose reductase)	0.00186121	0.000765145	44.1608
5219	Bladder cancer	Sus scrofa cyclin-dependent kinase 4 (CDK4), mRNA	CDK4	BC010153.2	1019	CDK4	cyclin-dependent kinase 4	0.00205415	0.000778734	42.0579
5219	Bladder cancer	Sus scrofa gelatinase A (MMP-2), mRNA	MMP-2	NM_004530.4	4313	MMP2	matrix metallopeptidase 2 (gelatinase A, 72kDa gelatinase, 72kDa type IV collagenase)	0.00205415	0.000778734	42.0579
3050	Proteasome	Sus scrofa proteasome (prosome, macropain) 26S subunit, non-ATPase, 4 (PSMD4), mRNA	PSMD4	BC072008.1	5710	PSMD4	proteasome (prosome, macropain) 26S subunit, non-ATPase, 4	0.00246761	0.000801749	38.4007
3050	Proteasome	Sus scrofa mRNA, clone:MLN010095C03, expressed in mesenteric lymph node	PSMD4	BC072008.1	5710	PSMD4	proteasome (prosome, macropain) 26S subunit, non-ATPase, 4	0.00246761	0.000801749	38.4007
3050	Proteasome	PREDICTED: Sus scrofa similar to Proteasome (prosome, macropain) subunit, beta type, 4 (LOC100153923), mRNA	LOC100153923	BC008314.2	5692	PSMB4	proteasome (prosome, macropain) subunit, beta type, 4	0.00246761	0.000801749	38.4007
3050	Proteasome	Sus scrofa mRNA, clone:THY010107F05, expressed in thymus	LOC100153923	BC008314.2	5692	PSMB4	proteasome (prosome, macropain) subunit, beta type, 4	0.00246761	0.000801749	38.4007
4260	Cardiac muscle contraction	Sus scrofa TPM3 (TPM3) mRNA, complete cds	TPM3	BC008407.1	7170	TPM3	tropomyosin 3	0.00538532	0.00130471	25.9769
4260	Cardiac muscle contraction	Sus scrofa ATPase, Na+/K+ transporting, alpha 1 polypeptide (ATP1A1), mRNA	ATP1A1	BC003077.2	476	ATP1A1	ATPase, Na+/K+ transporting, alpha 1 polypeptide	0.00538532	0.00130471	25.9769
5222	Small cell lung cancer	Sus scrofa cyclin-dependent kinase 4 (CDK4), mRNA	CDK4	BC010153.2	1019	CDK4	cyclin-dependent kinase 4	0.00670957	0.00145731	23.2425
5222	Small cell lung cancer	PREDICTED: Sus scrofa similar to CDC28 protein kinase 1B (LOC100155110), mRNA	LOC100155110	BC070320.1	1163	CKS1B	CDC28 protein kinase regulatory subunit 1B	0.00670957	0.00145731	23.2425
4350	TGF-beta signaling pathway	PREDICTED: Sus scrofa similar to Thrombospondin-3 (LOC100155108), mRNA	LOC100155108	NM_007112.3	7059	THBS3	thrombospondin 3	0.00779242	0.00156045	21.5418
4350	TGF-beta signaling pathway	Sus scrofa decorin (DCN), mRNA	DCN	NM_001920.3	1634	DCN	decorin	0.00779242	0.00156045	21.5418
4530	Tight junction	Sus scrofa cyclin-dependent kinase 4 (CDK4), mRNA	CDK4	BC010153.2	1019	CDK4	cyclin-dependent kinase 4	0.00817024	0.00159275	21.0289
4530	Tight junction	Sus scrofa myosin, heavy chain 7, cardiac muscle, beta (MYH7), mRNA	MYH7	NM_000257.2	4625	MYH7	myosin, heavy chain 7, cardiac muscle, beta	0.00817024	0.00159275	21.0289
4110	Cell cycle	Sus scrofa cyclin-dependent kinase 4 (CDK4), mRNA	CDK4	BC010153.2	1019	CDK4	cyclin-dependent kinase 4	0.0101842	0.00180487	18.7918
4110	Cell cycle	PREDICTED: Sus scrofa tyrosine 3-monooxygenase/tryptophan 5-monooxygenase activation protein, zeta polypeptide (YWHAZ), mRNA	YWHAZ	NM_145690.2	7534	YWHAZ	tyrosine 3-monooxygenase/tryptophan 5-monooxygenase activation protein, zeta polypeptide	0.0101842	0.00180487	18.7918
4722	Neurotrophin signaling pathway	PREDICTED: Sus scrofa tyrosine 3-monooxygenase/tryptophan 5-monooxygenase activation protein, zeta polypeptide (YWHAZ), mRNA	YWHAZ	NM_145690.2	7534	YWHAZ	tyrosine 3-monooxygenase/tryptophan 5-monooxygenase activation protein, zeta polypeptide	0.0128704	0.00209086	16.6644
4722	Neurotrophin signaling pathway	Sus scrofa melanoma antigen family D, 1 (MAGED1), mRNA	MAGED1	AF300328.1	9500	MAGED1	melanoma antigen family D, 1	0.0128704	0.00209086	16.6644
40	Pentose and glucuronate interconversions	Sus scrofa aldose reductase (ALR2), mRNA	ALR2	AK313439.1	231	AKR1B1	aldo-keto reductase family 1, member B1 (aldose reductase)	0.0180554	0.00270755	110.402
52	Galactose metabolism	Sus scrofa aldose reductase (ALR2), mRNA	ALR2	AK313439.1	231	AKR1B1	aldo-keto reductase family 1, member B1 (aldose reductase)	0.0359509	0.00461418	55.201
51	Fructose and mannose metabolism	Sus scrofa aldose reductase (ALR2), mRNA	ALR2	AK313439.1	231	AKR1B1	aldo-keto reductase family 1, member B1 (aldose reductase)	0.0580977	0.00632803	33.9698
910	Nitrogen metabolism	Sus scrofa carbonic anhydrase III, muscle specific (CA3), mRNA	CA3	NM_005181.3	761	CA3	carbonic anhydrase III, muscle specific	0.0624976	0.00660854	31.5434
5216	Thyroid cancer	Sus scrofa TPM3 (TPM3) mRNA, complete cds	TPM3	BC008407.1	7170	TPM3	tropomyosin 3	0.0756387	0.00735668	25.9769
640	Propanoate metabolism	Sus scrofa lactate dehydrogenase B (LDHB), mRNA	LDHB	NM_002300.5	3945	LDHB	lactate dehydrogenase B	0.0756387	0.00735668	25.9769
270	Cysteine and methionine metabolism	Sus scrofa lactate dehydrogenase B (LDHB), mRNA	LDHB	NM_002300.5	3945	LDHB	lactate dehydrogenase B	0.0756387	0.00735668	25.9769
561	Glycerolipid metabolism	Sus scrofa aldose reductase (ALR2), mRNA	ALR2	AK313439.1	231	AKR1B1	aldo-keto reductase family 1, member B1 (aldose reductase)	0.0843508	0.00778986	23.2425
5223	Non-small cell lung cancer	Sus scrofa cyclin-dependent kinase 4 (CDK4), mRNA	CDK4	BC010153.2	1019	CDK4	cyclin-dependent kinase 4	0.0930243	0.00817975	21.0289
10	Glycolysis / Gluconeogenesis	Sus scrofa lactate dehydrogenase B (LDHB), mRNA	LDHB	NM_002300.5	3945	LDHB	lactate dehydrogenase B	0.105962	0.00869662	18.4003
480	Glutathione metabolism	Sus scrofa glutathione peroxidase 1 (GPX1), mRNA	GPX1	AK225835.1	2876	GPX1	glutathione peroxidase 1	0.110256	0.00885326	17.6643
5214	Glioma	Sus scrofa cyclin-dependent kinase 4 (CDK4), mRNA	CDK4	BC010153.2	1019	CDK4	cyclin-dependent kinase 4	0.118814	0.0091461	16.3558
5218	Melanoma	Sus scrofa cyclin-dependent kinase 4 (CDK4), mRNA	CDK4	BC010153.2	1019	CDK4	cyclin-dependent kinase 4	0.131581	0.00954054	14.7203
4115	p53 signaling pathway	Sus scrofa cyclin-dependent kinase 4 (CDK4), mRNA	CDK4	BC010153.2	1019	CDK4	cyclin-dependent kinase 4	0.140045	0.00977773	13.8002
590	Arachidonic acid metabolism	Sus scrofa glutathione peroxidase 1 (GPX1), mRNA	GPX1	AK225835.1	2876	GPX1	glutathione peroxidase 1	0.140045	0.00977773	13.8002
4940	Type I diabetes mellitus	Sus scrofa carboxypeptidase E (CPE), mRNA	CPE	BC033866.1	1363	CPE	carboxypeptidase E	0.15686	0.0102003	12.2669
5220	Chronic myeloid leukemia	Sus scrofa cyclin-dependent kinase 4 (CDK4), mRNA	CDK4	BC010153.2	1019	CDK4	cyclin-dependent kinase 4	0.15686	0.0102003	12.2669
3010	Ribosome	Sus scrofa ribosomal protein SA (RPSA), mRNA	RPSA	BC005391.1	3921	RPSA	ribosomal protein SA	0.16104	0.0102965	11.9353
5212	Pancreatic cancer	Sus scrofa cyclin-dependent kinase 4 (CDK4), mRNA	CDK4	BC010153.2	1019	CDK4	cyclin-dependent kinase 4	0.165211	0.0103894	11.6213
4912	GnRH signaling pathway	Sus scrofa gelatinase A (MMP-2), mRNA	MMP-2	NM_004530.4	4313	MMP2	matrix metallopeptidase 2 (gelatinase A, 72kDa gelatinase, 72kDa type IV collagenase)	0.19415	0.0113528	9.81351
4670	Leukocyte transendothelial migration	Sus scrofa gelatinase A (MMP-2), mRNA	MMP-2	NM_004530.4	4313	MMP2	matrix metallopeptidase 2 (gelatinase A, 72kDa gelatinase, 72kDa type IV collagenase)	0.198247	0.0114784	9.60017
3320	PPAR signaling pathway	Sus scrofa partial mRNA for heart fatty acid-binding protein (FABP3 gene)	FABP3	AK314122.1	2170	FABP3	fatty acid binding protein 3, muscle and heart (mammary-derived growth inhibitor)	0.202336	0.0116013	9.39591
3320	PPAR signaling pathway	Sus scrofa fatty acid binding protein 3, muscle and heart (mammary-derived growth inhibitor) (FABP3), mRNA	FABP3	NM_004102.3	2170	FABP3	fatty acid binding protein 3, muscle and heart (mammary-derived growth inhibitor)	0.202336	0.0116013	9.39591
4660	T cell receptor signaling pathway	Sus scrofa cyclin-dependent kinase 4 (CDK4), mRNA	CDK4	BC010153.2	1019	CDK4	cyclin-dependent kinase 4	0.26258	0.0140877	7.12271
5012	Parkinson's disease	Sus scrofa solute carrier family 25 (mitochondrial carrier; adenine nucleotide translocator), member 6 (SLC25A6), nuclear gene encoding mitochondrial protein, mRNA	SLC25A6	NM_001636.3	293	SLC25A6	solute carrier family 25 (mitochondrial carrier; adenine nucleotide translocator), member 6	0.26258	0.0140877	7.12271
5016	Huntington's disease	Sus scrofa solute carrier family 25 (mitochondrial carrier; adenine nucleotide translocator), member 6 (SLC25A6), nuclear gene encoding mitochondrial protein, mRNA	SLC25A6	NM_001636.3	293	SLC25A6	solute carrier family 25 (mitochondrial carrier; adenine nucleotide translocator), member 6	0.293897	0.0152579	6.30868
4020	Calcium signaling pathway	Sus scrofa solute carrier family 25 (mitochondrial carrier; adenine nucleotide translocator), member 6 (SLC25A6), nuclear gene encoding mitochondrial protein, mRNA	SLC25A6	NM_001636.3	293	SLC25A6	solute carrier family 25 (mitochondrial carrier; adenine nucleotide translocator), member 6	0.305497	0.0156724	6.04942
5010	Alzheimer's disease	Sus scrofa apolipoprotein E (APOE), mRNA	APOE	AK314898.1	348	APOE	apolipoprotein E	0.336055	0.016798	5.45195
4010	MAPK signaling pathway	Sus scrofa stathmin-1 (LOC494463), mRNA	LOC494463	BC082228.1	3925	STMN1	stathmin 1	0.377191	0.0184819	4.80009
1100	Metabolic pathways	Sus scrofa lactate dehydrogenase B (LDHB), mRNA	LDHB	NM_002300.5	3945	LDHB	lactate dehydrogenase B	0.487035	0.0237363	2.11802
1100	Metabolic pathways	Sus scrofa aldose reductase (ALR2), mRNA	ALR2	AK313439.1	231	AKR1B1	aldo-keto reductase family 1, member B1 (aldose reductase)	0.487035	0.0237363	2.11802

## Sheet: LR5 vs LR4-up regulation
path_id	path_name	pig_Description	pig_Gene symbol	human_Genebank	human_Gene ID	human_Gene	human_Gene des	pvalue	FDR	enrichment
1100	Metabolic pathways	Sus scrofa enolase 3 (beta, muscle) (ENO3), mRNA	ENO3	NM_053013.2	2027	ENO3	enolase 3 (beta, muscle)	1.8405e-08	4.46818e-08	8.87829
1100	Metabolic pathways	Sus scrofa cytochrome c oxidase subunit VIIc (COX7C), nuclear gene encoding mitochondrial protein, mRNA	COX7C	NM_001867.2	1350	COX7C	cytochrome c oxidase subunit VIIc	1.8405e-08	4.46818e-08	8.87829
1100	Metabolic pathways	Sus scrofa isocitrate dehydrogenase 3 (NAD+) beta (IDH3B), nuclear gene encoding mitochondrial protein, mRNA	IDH3B	BX647393.1	3420	IDH3B	isocitrate dehydrogenase 3 (NAD+) beta	1.8405e-08	4.46818e-08	8.87829
1100	Metabolic pathways	Sus scrofa creatine kinase, muscle (CKM), mRNA	CKM	AK129878.1	1158	CKM	creatine kinase, muscle	1.8405e-08	4.46818e-08	8.87829
1100	Metabolic pathways	PREDICTED: Sus scrofa similar to ATP synthase, H+ transporting, mitochondrial F1 complex, alpha subunit 1, cardiac muscle (LOC100157880), mRNA	ATP5A1	AK289457.1	498	ATP5A1	ATP synthase, H+ transporting, mitochondrial F1 complex, alpha subunit 1, cardiac muscle	1.8405e-08	4.46818e-08	8.87829
1100	Metabolic pathways	PREDICTED: Sus scrofa similar to NADH dehydrogenase (ubiquinone) Fe-S protein 2, 49kDa (NADH-coenzyme Q reductase) (LOC100156075), mRNA	LOC100156075	NM_004550.4	4720	NDUFS2	NADH dehydrogenase (ubiquinone) Fe-S protein 2, 49kDa (NADH-coenzyme Q reductase)	1.8405e-08	4.46818e-08	8.87829
1100	Metabolic pathways	PREDICTED: Sus scrofa similar to ATP synthase subunit beta, mitochondrial (LOC100157156), mRNA	LOC100157156	CR600201.1	506	ATP5B	ATP synthase, H+ transporting, mitochondrial F1 complex, beta polypeptide	1.8405e-08	4.46818e-08	8.87829
1100	Metabolic pathways	PREDICTED: Sus scrofa similar to Cytochrome c oxidase copper chaperone (Dopuin) (LOC100156799), mRNA	LOC100156799	BC108317.1	10063	COX17	COX17 cytochrome c oxidase assembly homolog (S. cerevisiae)	1.8405e-08	4.46818e-08	8.87829
1100	Metabolic pathways	Sus scrofa adenylosuccinate lyase (ADSL), mRNA	ADSL	NM_000026.2	158	ADSL	adenylosuccinate lyase	1.8405e-08	4.46818e-08	8.87829
1100	Metabolic pathways	Sus scrofa acyl-Coenzyme A dehydrogenase, C-2 to C-3 short chain (ACADS), nuclear gene encoding mitochondrial protein, mRNA	ACADS	NM_000017.2	35	ACADS	acyl-Coenzyme A dehydrogenase, C-2 to C-3 short chain	1.8405e-08	4.46818e-08	8.87829
1100	Metabolic pathways	Sus scrofa aldose reductase (ALR2), mRNA	ALR2	AK313439.1	231	AKR1B1	aldo-keto reductase family 1, member B1 (aldose reductase)	1.8405e-08	4.46818e-08	8.87829
1100	Metabolic pathways	Sus scrofa acyl-CoA synthetase long-chain family member 4 variant 2 (ACSL4) mRNA, partial cds, alternatively spliced	ACSL4	AK307566.1	2182	ACSL4	acyl-CoA synthetase long-chain family member 4	1.8405e-08	4.46818e-08	8.87829
1100	Metabolic pathways	Sus scrofa acyl-CoA synthetase long-chain family member 4 (ACSL4), mRNA	ACSL4	NM_004458.2	2182	ACSL4	acyl-CoA synthetase long-chain family member 4	1.8405e-08	4.46818e-08	8.87829
1100	Metabolic pathways	1139821 MARC 4PIG Sus scrofa cDNA 3', mRNA sequence	COX7C					1.8405e-08	4.46818e-08	8.87829
190	Oxidative phosphorylation	Sus scrofa cytochrome c oxidase subunit VIIc (COX7C), nuclear gene encoding mitochondrial protein, mRNA	COX7C	NM_001867.2	1350	COX7C	cytochrome c oxidase subunit VIIc	2.28617e-06	2.77506e-06	27.0632
190	Oxidative phosphorylation	PREDICTED: Sus scrofa similar to ATP synthase, H+ transporting, mitochondrial F1 complex, alpha subunit 1, cardiac muscle (LOC100157880), mRNA	ATP5A1	AK289457.1	498	ATP5A1	ATP synthase, H+ transporting, mitochondrial F1 complex, alpha subunit 1, cardiac muscle	2.28617e-06	2.77506e-06	27.0632
190	Oxidative phosphorylation	PREDICTED: Sus scrofa similar to NADH dehydrogenase (ubiquinone) Fe-S protein 2, 49kDa (NADH-coenzyme Q reductase) (LOC100156075), mRNA	LOC100156075	NM_004550.4	4720	NDUFS2	NADH dehydrogenase (ubiquinone) Fe-S protein 2, 49kDa (NADH-coenzyme Q reductase)	2.28617e-06	2.77506e-06	27.0632
190	Oxidative phosphorylation	PREDICTED: Sus scrofa similar to ATP synthase subunit beta, mitochondrial (LOC100157156), mRNA	LOC100157156	CR600201.1	506	ATP5B	ATP synthase, H+ transporting, mitochondrial F1 complex, beta polypeptide	2.28617e-06	2.77506e-06	27.0632
190	Oxidative phosphorylation	PREDICTED: Sus scrofa similar to Cytochrome c oxidase copper chaperone (Dopuin) (LOC100156799), mRNA	LOC100156799	BC108317.1	10063	COX17	COX17 cytochrome c oxidase assembly homolog (S. cerevisiae)	2.28617e-06	2.77506e-06	27.0632
190	Oxidative phosphorylation	1139821 MARC 4PIG Sus scrofa cDNA 3', mRNA sequence	COX7C					2.28617e-06	2.77506e-06	27.0632
4510	Focal adhesion	Sus scrofa caveolin 1 (CAV1), mRNA	CAV1	NM_001753.3	857	CAV1	caveolin 1, caveolae protein, 22kDa	1.02588e-05	8.3017e-06	20.0338
4510	Focal adhesion	Sus scrofa tenascin-X (TN-X), mRNA	SBAB-514B12.2	NM_019105.6	7148	TNXB	tenascin XB	1.02588e-05	8.3017e-06	20.0338
4510	Focal adhesion	Sus scrofa caveolin 2 (CAV2), mRNA	CAV2	BC005256.1	858	CAV2	caveolin 2	1.02588e-05	8.3017e-06	20.0338
4510	Focal adhesion	Sus scrofa putative inhibitor of apoptosis (PIAP), mRNA	PIAP	NM_182962.1	330	BIRC3	baculoviral IAP repeat-containing 3	1.02588e-05	8.3017e-06	20.0338
4510	Focal adhesion	Sus scrofa fast skeletal myosin light chain 2 (MYLPF), mRNA	MYLPF	NM_013292.3	29895	MYLPF	myosin light chain, phosphorylatable, fast skeletal muscle	1.02588e-05	8.3017e-06	20.0338
5012	Parkinson's disease	Sus scrofa cytochrome c oxidase subunit VIIc (COX7C), nuclear gene encoding mitochondrial protein, mRNA	COX7C	NM_001867.2	1350	COX7C	cytochrome c oxidase subunit VIIc	9.82963e-05	5.69764e-05	19.9046
5012	Parkinson's disease	PREDICTED: Sus scrofa similar to ATP synthase, H+ transporting, mitochondrial F1 complex, alpha subunit 1, cardiac muscle (LOC100157880), mRNA	ATP5A1	AK289457.1	498	ATP5A1	ATP synthase, H+ transporting, mitochondrial F1 complex, alpha subunit 1, cardiac muscle	9.82963e-05	5.69764e-05	19.9046
5012	Parkinson's disease	PREDICTED: Sus scrofa similar to NADH dehydrogenase (ubiquinone) Fe-S protein 2, 49kDa (NADH-coenzyme Q reductase) (LOC100156075), mRNA	LOC100156075	NM_004550.4	4720	NDUFS2	NADH dehydrogenase (ubiquinone) Fe-S protein 2, 49kDa (NADH-coenzyme Q reductase)	9.82963e-05	5.69764e-05	19.9046
5012	Parkinson's disease	PREDICTED: Sus scrofa similar to ATP synthase subunit beta, mitochondrial (LOC100157156), mRNA	LOC100157156	CR600201.1	506	ATP5B	ATP synthase, H+ transporting, mitochondrial F1 complex, beta polypeptide	9.82963e-05	5.69764e-05	19.9046
5012	Parkinson's disease	1139821 MARC 4PIG Sus scrofa cDNA 3', mRNA sequence	COX7C					9.82963e-05	5.69764e-05	19.9046
5016	Huntington's disease	Sus scrofa cytochrome c oxidase subunit VIIc (COX7C), nuclear gene encoding mitochondrial protein, mRNA	COX7C	NM_001867.2	1350	COX7C	cytochrome c oxidase subunit VIIc	0.000158435	7.69263e-05	17.6297
5016	Huntington's disease	PREDICTED: Sus scrofa similar to ATP synthase, H+ transporting, mitochondrial F1 complex, alpha subunit 1, cardiac muscle (LOC100157880), mRNA	ATP5A1	AK289457.1	498	ATP5A1	ATP synthase, H+ transporting, mitochondrial F1 complex, alpha subunit 1, cardiac muscle	0.000158435	7.69263e-05	17.6297
5016	Huntington's disease	PREDICTED: Sus scrofa similar to NADH dehydrogenase (ubiquinone) Fe-S protein 2, 49kDa (NADH-coenzyme Q reductase) (LOC100156075), mRNA	LOC100156075	NM_004550.4	4720	NDUFS2	NADH dehydrogenase (ubiquinone) Fe-S protein 2, 49kDa (NADH-coenzyme Q reductase)	0.000158435	7.69263e-05	17.6297
5016	Huntington's disease	PREDICTED: Sus scrofa similar to ATP synthase subunit beta, mitochondrial (LOC100157156), mRNA	LOC100157156	CR600201.1	506	ATP5B	ATP synthase, H+ transporting, mitochondrial F1 complex, beta polypeptide	0.000158435	7.69263e-05	17.6297
5016	Huntington's disease	1139821 MARC 4PIG Sus scrofa cDNA 3', mRNA sequence	COX7C					0.000158435	7.69263e-05	17.6297
5010	Alzheimer's disease	Sus scrofa cytochrome c oxidase subunit VIIc (COX7C), nuclear gene encoding mitochondrial protein, mRNA	COX7C	NM_001867.2	1350	COX7C	cytochrome c oxidase subunit VIIc	0.000279865	0.00010623	15.2356
5010	Alzheimer's disease	PREDICTED: Sus scrofa similar to ATP synthase, H+ transporting, mitochondrial F1 complex, alpha subunit 1, cardiac muscle (LOC100157880), mRNA	ATP5A1	AK289457.1	498	ATP5A1	ATP synthase, H+ transporting, mitochondrial F1 complex, alpha subunit 1, cardiac muscle	0.000279865	0.00010623	15.2356
5010	Alzheimer's disease	PREDICTED: Sus scrofa similar to NADH dehydrogenase (ubiquinone) Fe-S protein 2, 49kDa (NADH-coenzyme Q reductase) (LOC100156075), mRNA	LOC100156075	NM_004550.4	4720	NDUFS2	NADH dehydrogenase (ubiquinone) Fe-S protein 2, 49kDa (NADH-coenzyme Q reductase)	0.000279865	0.00010623	15.2356
5010	Alzheimer's disease	PREDICTED: Sus scrofa similar to ATP synthase subunit beta, mitochondrial (LOC100157156), mRNA	LOC100157156	CR600201.1	506	ATP5B	ATP synthase, H+ transporting, mitochondrial F1 complex, beta polypeptide	0.000279865	0.00010623	15.2356
5010	Alzheimer's disease	1139821 MARC 4PIG Sus scrofa cDNA 3', mRNA sequence	COX7C					0.000279865	0.00010623	15.2356
1065	Biosynthesis of alkaloids derived from histidine and purine	Sus scrofa enolase 3 (beta, muscle) (ENO3), mRNA	ENO3	NM_053013.2	2027	ENO3	enolase 3 (beta, muscle)	0.000332428	0.000115291	28.0473
1065	Biosynthesis of alkaloids derived from histidine and purine	Sus scrofa isocitrate dehydrogenase 3 (NAD+) beta (IDH3B), nuclear gene encoding mitochondrial protein, mRNA	IDH3B	BX647393.1	3420	IDH3B	isocitrate dehydrogenase 3 (NAD+) beta	0.000332428	0.000115291	28.0473
1065	Biosynthesis of alkaloids derived from histidine and purine	Sus scrofa adenylosuccinate lyase (ADSL), mRNA	ADSL	NM_000026.2	158	ADSL	adenylosuccinate lyase	0.000332428	0.000115291	28.0473
4530	Tight junction	PREDICTED: Sus scrofa similar to Ras-related protein Rab-13 (Cell growth-inhibiting gene 4 protein) (LOC100154707), mRNA	LOC100154707	AK291580.1	5872	RAB13	RAB13, member RAS oncogene family	0.000684984	0.000207866	22.0372
4530	Tight junction	Sus scrofa fast skeletal myosin light chain 2 (MYLPF), mRNA	MYLPF	NM_013292.3	29895	MYLPF	myosin light chain, phosphorylatable, fast skeletal muscle	0.000684984	0.000207866	22.0372
4530	Tight junction	Sus scrofa myosin, heavy chain 7, cardiac muscle, beta (MYH7), mRNA	MYH7	NM_000257.2	4625	MYH7	myosin, heavy chain 7, cardiac muscle, beta	0.000684984	0.000207866	22.0372
71	Fatty acid metabolism	Sus scrofa acyl-Coenzyme A dehydrogenase, C-2 to C-3 short chain (ACADS), nuclear gene encoding mitochondrial protein, mRNA	ACADS	NM_000017.2	35	ACADS	acyl-Coenzyme A dehydrogenase, C-2 to C-3 short chain	0.00341965	0.000844886	32.4758
71	Fatty acid metabolism	Sus scrofa acyl-CoA synthetase long-chain family member 4 variant 2 (ACSL4) mRNA, partial cds, alternatively spliced	ACSL4	AK307566.1	2182	ACSL4	acyl-CoA synthetase long-chain family member 4	0.00341965	0.000844886	32.4758
71	Fatty acid metabolism	Sus scrofa acyl-CoA synthetase long-chain family member 4 (ACSL4), mRNA	ACSL4	NM_004458.2	2182	ACSL4	acyl-CoA synthetase long-chain family member 4	0.00341965	0.000844886	32.4758
1063	Biosynthesis of alkaloids derived from shikimate pathway	Sus scrofa enolase 3 (beta, muscle) (ENO3), mRNA	ENO3	NM_053013.2	2027	ENO3	enolase 3 (beta, muscle)	0.00795095	0.00150194	21.2773
1063	Biosynthesis of alkaloids derived from shikimate pathway	Sus scrofa isocitrate dehydrogenase 3 (NAD+) beta (IDH3B), nuclear gene encoding mitochondrial protein, mRNA	IDH3B	BX647393.1	3420	IDH3B	isocitrate dehydrogenase 3 (NAD+) beta	0.00795095	0.00150194	21.2773
1064	Biosynthesis of alkaloids derived from ornithine, lysine and nicotinic acid	Sus scrofa enolase 3 (beta, muscle) (ENO3), mRNA	ENO3	NM_053013.2	2027	ENO3	enolase 3 (beta, muscle)	0.00850108	0.00156124	20.568
1064	Biosynthesis of alkaloids derived from ornithine, lysine and nicotinic acid	Sus scrofa isocitrate dehydrogenase 3 (NAD+) beta (IDH3B), nuclear gene encoding mitochondrial protein, mRNA	IDH3B	BX647393.1	3420	IDH3B	isocitrate dehydrogenase 3 (NAD+) beta	0.00850108	0.00156124	20.568
1062	Biosynthesis of terpenoids and steroids	Sus scrofa enolase 3 (beta, muscle) (ENO3), mRNA	ENO3	NM_053013.2	2027	ENO3	enolase 3 (beta, muscle)	0.00965275	0.00167529	19.2825
1062	Biosynthesis of terpenoids and steroids	Sus scrofa isocitrate dehydrogenase 3 (NAD+) beta (IDH3B), nuclear gene encoding mitochondrial protein, mRNA	IDH3B	BX647393.1	3420	IDH3B	isocitrate dehydrogenase 3 (NAD+) beta	0.00965275	0.00167529	19.2825
1066	Biosynthesis of alkaloids derived from terpenoid and polyketide	Sus scrofa enolase 3 (beta, muscle) (ENO3), mRNA	ENO3	NM_053013.2	2027	ENO3	enolase 3 (beta, muscle)	0.0102541	0.00172999	18.6982
1066	Biosynthesis of alkaloids derived from terpenoid and polyketide	Sus scrofa isocitrate dehydrogenase 3 (NAD+) beta (IDH3B), nuclear gene encoding mitochondrial protein, mRNA	IDH3B	BX647393.1	3420	IDH3B	isocitrate dehydrogenase 3 (NAD+) beta	0.0102541	0.00172999	18.6982
4260	Cardiac muscle contraction	Sus scrofa cytochrome c oxidase subunit VIIc (COX7C), nuclear gene encoding mitochondrial protein, mRNA	COX7C	NM_001867.2	1350	COX7C	cytochrome c oxidase subunit VIIc	0.0108722	0.00178313	18.1483
4260	Cardiac muscle contraction	Sus scrofa tropomyosin 2 (beta) (TPM2), mRNA	TPM2	NM_213674.1	7169	TPM2	tropomyosin 2 (beta)	0.0108722	0.00178313	18.1483
4260	Cardiac muscle contraction	1139821 MARC 4PIG Sus scrofa cDNA 3', mRNA sequence	COX7C					0.0108722	0.00178313	18.1483
3010	Ribosome	Sus scrofa ribosomal protein SA (RPSA), mRNA	RPSA	BC005391.1	3921	RPSA	ribosomal protein SA	0.0128265	0.00193322	16.6768
3010	Ribosome	Sus scrofa ribosomal protein S20 (RPS20), mRNA	RPS20	NM_001023.3	6224	RPS20	ribosomal protein S20	0.0128265	0.00193322	16.6768
3010	Ribosome	1103217 MARC 4PIG Sus scrofa cDNA 3', mRNA sequence	RPS20					0.0128265	0.00193322	16.6768
5222	Small cell lung cancer	PREDICTED: Sus scrofa similar to CDC28 protein kinase 1B (LOC100155110), mRNA	LOC100155110	BC070320.1	1163	CKS1B	CDC28 protein kinase regulatory subunit 1B	0.0135109	0.00198019	16.2379
5222	Small cell lung cancer	Sus scrofa putative inhibitor of apoptosis (PIAP), mRNA	PIAP	NM_182962.1	330	BIRC3	baculoviral IAP repeat-containing 3	0.0135109	0.00198019	16.2379
1070	Biosynthesis of plant hormones	Sus scrofa enolase 3 (beta, muscle) (ENO3), mRNA	ENO3	NM_053013.2	2027	ENO3	enolase 3 (beta, muscle)	0.0142115	0.00202567	15.8216
1070	Biosynthesis of plant hormones	Sus scrofa isocitrate dehydrogenase 3 (NAD+) beta (IDH3B), nuclear gene encoding mitochondrial protein, mRNA	IDH3B	BX647393.1	3420	IDH3B	isocitrate dehydrogenase 3 (NAD+) beta	0.0142115	0.00202567	15.8216
4920	Adipocytokine signaling pathway	Sus scrofa solute carrier family 2 (facilitated glucose transporter), member 4 (SLC2A4), mRNA	SLC2A4	NM_001042.2	6517	SLC2A4	solute carrier family 2 (facilitated glucose transporter), member 4	0.0156612	0.00211225	15.0498
4920	Adipocytokine signaling pathway	Sus scrofa acyl-CoA synthetase long-chain family member 4 variant 2 (ACSL4) mRNA, partial cds, alternatively spliced	ACSL4	AK307566.1	2182	ACSL4	acyl-CoA synthetase long-chain family member 4	0.0156612	0.00211225	15.0498
4920	Adipocytokine signaling pathway	Sus scrofa acyl-CoA synthetase long-chain family member 4 (ACSL4), mRNA	ACSL4	NM_004458.2	2182	ACSL4	acyl-CoA synthetase long-chain family member 4	0.0156612	0.00211225	15.0498
4670	Leukocyte transendothelial migration	Sus scrofa cadherin 5 (CDH5), mRNA	CDH5	AK300461.1	1003	CDH5	cadherin 5, type 2 (vascular endothelium)	0.0195626	0.00242095	13.4139
4670	Leukocyte transendothelial migration	Sus scrofa fast skeletal myosin light chain 2 (MYLPF), mRNA	MYLPF	NM_013292.3	29895	MYLPF	myosin light chain, phosphorylatable, fast skeletal muscle	0.0195626	0.00242095	13.4139
5200	Pathways in cancer	PREDICTED: Sus scrofa similar to CDC28 protein kinase 1B (LOC100155110), mRNA	LOC100155110	BC070320.1	1163	CKS1B	CDC28 protein kinase regulatory subunit 1B	0.0204865	0.00248675	6.70697
5200	Pathways in cancer	Sus scrofa heat shock protein 90kDa beta (Grp94), member 1 (HSP90B1), mRNA	HSP90B1	NM_003299.1	7184	HSP90B1	heat shock protein 90kDa beta (Grp94), member 1	0.0204865	0.00248675	6.70697
5200	Pathways in cancer	Sus scrofa putative inhibitor of apoptosis (PIAP), mRNA	PIAP	NM_182962.1	330	BIRC3	baculoviral IAP repeat-containing 3	0.0204865	0.00248675	6.70697
40	Pentose and glucuronate interconversions	Sus scrofa aldose reductase (ALR2), mRNA	ALR2	AK313439.1	231	AKR1B1	aldo-keto reductase family 1, member B1 (aldose reductase)	0.0258061	0.0029833	77.1301
52	Galactose metabolism	Sus scrofa aldose reductase (ALR2), mRNA	ALR2	AK313439.1	231	AKR1B1	aldo-keto reductase family 1, member B1 (aldose reductase)	0.0512838	0.00533648	38.5651
51	Fructose and mannose metabolism	Sus scrofa aldose reductase (ALR2), mRNA	ALR2	AK313439.1	231	AKR1B1	aldo-keto reductase family 1, member B1 (aldose reductase)	0.0826752	0.00766029	23.7323
250	Alanine, aspartate and glutamate metabolism	Sus scrofa adenylosuccinate lyase (ADSL), mRNA	ADSL	NM_000026.2	158	ADSL	adenylosuccinate lyase	0.0888933	0.00806145	22.0372
650	Butanoate metabolism	Sus scrofa acyl-Coenzyme A dehydrogenase, C-2 to C-3 short chain (ACADS), nuclear gene encoding mitochondrial protein, mRNA	ACADS	NM_000017.2	35	ACADS	acyl-Coenzyme A dehydrogenase, C-2 to C-3 short chain	0.0888933	0.00806145	22.0372
20	Citrate cycle (TCA cycle)	Sus scrofa isocitrate dehydrogenase 3 (NAD+) beta (IDH3B), nuclear gene encoding mitochondrial protein, mRNA	IDH3B	BX647393.1	3420	IDH3B	isocitrate dehydrogenase 3 (NAD+) beta	0.107429	0.00916216	18.1483
4930	Type II diabetes mellitus	Sus scrofa solute carrier family 2 (facilitated glucose transporter), member 4 (SLC2A4), mRNA	SLC2A4	NM_001042.2	6517	SLC2A4	solute carrier family 2 (facilitated glucose transporter), member 4	0.113568	0.00949837	17.14
561	Glycerolipid metabolism	Sus scrofa aldose reductase (ALR2), mRNA	ALR2	AK313439.1	231	AKR1B1	aldo-keto reductase family 1, member B1 (aldose reductase)	0.119687	0.0098208	16.2379
620	Pyruvate metabolism	Sus scrofa aldose reductase (ALR2), mRNA	ALR2	AK313439.1	231	AKR1B1	aldo-keto reductase family 1, member B1 (aldose reductase)	0.125787	0.0101303	15.426
280	Valine, leucine and isoleucine degradation	Sus scrofa acyl-Coenzyme A dehydrogenase, C-2 to C-3 short chain (ACADS), nuclear gene encoding mitochondrial protein, mRNA	ACADS	NM_000017.2	35	ACADS	acyl-Coenzyme A dehydrogenase, C-2 to C-3 short chain	0.137928	0.0107134	14.0237
3050	Proteasome	PREDICTED: Sus scrofa similar to P26s4 (LOC100155274), mRNA	LOC100155274	NM_002802.2	5700	PSMC1	proteasome (prosome, macropain) 26S subunit, ATPase, 1	0.143969	0.0109884	13.4139
10	Glycolysis / Gluconeogenesis	Sus scrofa enolase 3 (beta, muscle) (ENO3), mRNA	ENO3	NM_053013.2	2027	ENO3	enolase 3 (beta, muscle)	0.149991	0.0112532	12.855
1061	Biosynthesis of phenylpropanoids	Sus scrofa enolase 3 (beta, muscle) (ENO3), mRNA	ENO3	NM_053013.2	2027	ENO3	enolase 3 (beta, muscle)	0.161978	0.0117542	11.8662
330	Arginine and proline metabolism	Sus scrofa creatine kinase, muscle (CKM), mRNA	CKM	AK129878.1	1158	CKM	creatine kinase, muscle	0.167942	0.0119915	11.4267
4512	ECM-receptor interaction	Sus scrofa tenascin-X (TN-X), mRNA	SBAB-514B12.2	NM_019105.6	7148	TNXB	tenascin XB	0.185721	0.0128821	10.284
4120	Ubiquitin mediated proteolysis	Sus scrofa putative inhibitor of apoptosis (PIAP), mRNA	PIAP	NM_182962.1	330	BIRC3	baculoviral IAP repeat-containing 3	0.249467	0.0157931	7.52489
4210	Apoptosis	Sus scrofa putative inhibitor of apoptosis (PIAP), mRNA	PIAP	NM_182962.1	330	BIRC3	baculoviral IAP repeat-containing 3	0.277707	0.0169263	6.70697
3320	PPAR signaling pathway	Sus scrofa acyl-CoA synthetase long-chain family member 4 variant 2 (ACSL4) mRNA, partial cds, alternatively spliced	ACSL4	AK307566.1	2182	ACSL4	acyl-CoA synthetase long-chain family member 4	0.283301	0.0171409	6.56427
3320	PPAR signaling pathway	Sus scrofa acyl-CoA synthetase long-chain family member 4 (ACSL4), mRNA	ACSL4	NM_004458.2	2182	ACSL4	acyl-CoA synthetase long-chain family member 4	0.283301	0.0171409	6.56427
5215	Prostate cancer	Sus scrofa heat shock protein 90kDa beta (Grp94), member 1 (HSP90B1), mRNA	HSP90B1	NM_003299.1	7184	HSP90B1	heat shock protein 90kDa beta (Grp94), member 1	0.288876	0.0173516	6.42751
230	Purine metabolism	Sus scrofa adenylosuccinate lyase (ADSL), mRNA	ADSL	NM_000026.2	158	ADSL	adenylosuccinate lyase	0.294435	0.0175587	6.29634
4910	Insulin signaling pathway	Sus scrofa solute carrier family 2 (facilitated glucose transporter), member 4 (SLC2A4), mRNA	SLC2A4	NM_001042.2	6517	SLC2A4	solute carrier family 2 (facilitated glucose transporter), member 4	0.299975	0.0177621	6.17041
4514	Cell adhesion molecules (CAMs)	Sus scrofa cadherin 5 (CDH5), mRNA	CDH5	AK300461.1	1003	CDH5	cadherin 5, type 2 (vascular endothelium)	0.370403	0.0211135	4.89715
4630	Jak-STAT signaling pathway	Sus scrofa mRNA, clone:LVRM10088G11, expressed in liver	GHR	NM_000163.2	2690	GHR	growth hormone receptor	0.417467	0.023217	4.28501
4810	Regulation of actin cytoskeleton	Sus scrofa fast skeletal myosin light chain 2 (MYLPF), mRNA	MYLPF	NM_013292.3	29895	MYLPF	myosin light chain, phosphorylatable, fast skeletal muscle	0.432856	0.0238827	4.11361
4060	Cytokine-cytokine receptor interaction	Sus scrofa mRNA, clone:LVRM10088G11, expressed in liver	GHR	NM_000163.2	2690	GHR	growth hormone receptor	0.555481	0.0300203	3.08521
4080	Neuroactive ligand-receptor interaction	Sus scrofa mRNA, clone:LVRM10088G11, expressed in liver	GHR	NM_000163.2	2690	GHR	growth hormone receptor	0.588086	0.0317265	2.88337

## Sheet: LR5 vs LR4-down regulation
path_id	path_name	pig_Description	pig_Gene symbol	human_Genebank	human_Gene ID	human_Gene	human_Gene des	pvalue	FDR	enrichment
5200	Pathways in cancer	PREDICTED: Sus scrofa heat shock 90kD protein 1, beta (HSPCB), mRNA	HSPCB	AK297367.1	3326	HSP90AB1	heat shock protein 90kDa alpha (cytosolic), class B member 1	0.000426016	0	13.6002
5200	Pathways in cancer	PREDICTED: Sus scrofa similar to LOC513497 protein (LOC100152215), mRNA	LOC100152215	AB451290.1	1026	CDKN1A	cyclin-dependent kinase inhibitor 1A (p21, Cip1)	0.000426016	0	13.6002
5200	Pathways in cancer	Sus scrofa retinoid X receptor, gamma (RXRG), mRNA	RXRG	BC012063.1	6258	RXRG	retinoid X receptor, gamma	0.000426016	0	13.6002
5200	Pathways in cancer	Sus scrofa gelatinase A (MMP-2), mRNA	MMP-2	NM_004530.4	4313	MMP2	matrix metallopeptidase 2 (gelatinase A, 72kDa gelatinase, 72kDa type IV collagenase)	0.000426016	0	13.6002
5219	Bladder cancer	PREDICTED: Sus scrofa similar to LOC513497 protein (LOC100152215), mRNA	LOC100152215	AB451290.1	1026	CDKN1A	cyclin-dependent kinase inhibitor 1A (p21, Cip1)	0.00182039	0	44.6865
5219	Bladder cancer	Sus scrofa gelatinase A (MMP-2), mRNA	MMP-2	NM_004530.4	4313	MMP2	matrix metallopeptidase 2 (gelatinase A, 72kDa gelatinase, 72kDa type IV collagenase)	0.00182039	0	44.6865
790	Folate biosynthesis	Sus scrofa quinoid dihydropteridine reductase (QDPR), mRNA	QDPR	AK223437.1	5860	QDPR	quinoid dihydropteridine reductase	0.0085161	0	234.604
4670	Leukocyte transendothelial migration	PREDICTED: Sus scrofa similar to Actinin, alpha 2 (LOC100157406), mRNA	LOC100157406	NM_001103.2	88	ACTN2	actinin, alpha 2	0.00867267	0	20.4004
4670	Leukocyte transendothelial migration	Sus scrofa gelatinase A (MMP-2), mRNA	MMP-2	NM_004530.4	4313	MMP2	matrix metallopeptidase 2 (gelatinase A, 72kDa gelatinase, 72kDa type IV collagenase)	0.00867267	0	20.4004
4110	Cell cycle	PREDICTED: Sus scrofa similar to LOC513497 protein (LOC100152215), mRNA	LOC100152215	AB451290.1	1026	CDKN1A	cyclin-dependent kinase inhibitor 1A (p21, Cip1)	0.00904586	0	19.9663
4110	Cell cycle	BX672333 Sus Scrofa library (scac) Sus scrofa cDNA clone scac0036.j.03 5prim, mRNA sequence	CDH1					0.00904586	0	19.9663
5215	Prostate cancer	PREDICTED: Sus scrofa heat shock 90kD protein 1, beta (HSPCB), mRNA	HSPCB	AK297367.1	3326	HSP90AB1	heat shock protein 90kDa alpha (cytosolic), class B member 1	0.00942639	0	19.5503
5215	Prostate cancer	PREDICTED: Sus scrofa similar to LOC513497 protein (LOC100152215), mRNA	LOC100152215	AB451290.1	1026	CDKN1A	cyclin-dependent kinase inhibitor 1A (p21, Cip1)	0.00942639	0	19.5503
1100	Metabolic pathways	Sus scrofa quinoid dihydropteridine reductase (QDPR), mRNA	QDPR	AK223437.1	5860	QDPR	quinoid dihydropteridine reductase	0.023735	0	4.5008
1100	Metabolic pathways	Sus scrofa lactate dehydrogenase B (LDHB), mRNA	LDHB	NM_002300.5	3945	LDHB	lactate dehydrogenase B	0.023735	0	4.5008
1100	Metabolic pathways	PREDICTED: Sus scrofa similar to vacuolar H(+)-ATPase subunit; V-ATPase subunit; M16 (LOC100154379), mRNA	LOC100154379	NM_004888.3	9550	ATP6V1G1	ATPase, H+ transporting, lysosomal 13kDa, V1 subunit G1	0.023735	0	4.5008
1100	Metabolic pathways	Sus scrofa oligosaccharyltransferase OST48 (OST48), mRNA	OST48	NM_005216.4	1650	DDOST	dolichyl-diphosphooligosaccharide-protein glycosyltransferase	0.023735	0	4.5008
4010	MAPK signaling pathway	Sus scrofa myocyte enhancer factor 2C protein (MEF2C) mRNA, complete cds	MEF2C	NM_001131005.1	4208	MEF2C	myocyte enhancer factor 2C	0.0329641	0	10.2002
4010	MAPK signaling pathway	Sus scrofa stathmin-1 (LOC494463), mRNA	LOC494463	BC082228.1	3925	STMN1	stathmin 1	0.0329641	0	10.2002
4330	Notch signaling pathway	PREDICTED: Sus scrofa similar to Nicastrin (LOC100156098), mRNA	LOC100156098	NM_015331.2	23385	NCSTN	nicastrin	0.0547238	0	36.0929
640	Propanoate metabolism	Sus scrofa lactate dehydrogenase B (LDHB), mRNA	LDHB	NM_002300.5	3945	LDHB	lactate dehydrogenase B	0.071265	0	27.6005
270	Cysteine and methionine metabolism	Sus scrofa lactate dehydrogenase B (LDHB), mRNA	LDHB	NM_002300.5	3945	LDHB	lactate dehydrogenase B	0.071265	0	27.6005
5216	Thyroid cancer	Sus scrofa retinoid X receptor, gamma (RXRG), mRNA	RXRG	BC012063.1	6258	RXRG	retinoid X receptor, gamma	0.071265	0	27.6005
510	N-Glycan biosynthesis	Sus scrofa oligosaccharyltransferase OST48 (OST48), mRNA	OST48	NM_005216.4	1650	DDOST	dolichyl-diphosphooligosaccharide-protein glycosyltransferase	0.0753787	0	26.0671
620	Pyruvate metabolism	Sus scrofa lactate dehydrogenase B (LDHB), mRNA	LDHB	NM_002300.5	3945	LDHB	lactate dehydrogenase B	0.0835804	0	23.4604
5223	Non-small cell lung cancer	Sus scrofa retinoid X receptor, gamma (RXRG), mRNA	RXRG	BC012063.1	6258	RXRG	retinoid X receptor, gamma	0.0876684	0	22.3433
3050	Proteasome	PREDICTED: Sus scrofa similar to proteasome beta 5 subunit (LOC100155139), mRNA	LOC100155139	NM_002797.3	5693	PSMB5	proteasome (prosome, macropain) subunit, beta type, 5	0.0958188	0	20.4004
10	Glycolysis / Gluconeogenesis	Sus scrofa lactate dehydrogenase B (LDHB), mRNA	LDHB	NM_002300.5	3945	LDHB	lactate dehydrogenase B	0.0998812	0	19.5503
5214	Glioma	PREDICTED: Sus scrofa similar to LOC513497 protein (LOC100152215), mRNA	LOC100152215	AB451290.1	1026	CDKN1A	cyclin-dependent kinase inhibitor 1A (p21, Cip1)	0.112018	0	17.3781
4520	Adherens junction	PREDICTED: Sus scrofa similar to Actinin, alpha 2 (LOC100157406), mRNA	LOC100157406	NM_001103.2	88	ACTN2	actinin, alpha 2	0.120066	0	16.1796
5218	Melanoma	PREDICTED: Sus scrofa similar to LOC513497 protein (LOC100152215), mRNA	LOC100152215	AB451290.1	1026	CDKN1A	cyclin-dependent kinase inhibitor 1A (p21, Cip1)	0.124078	0	15.6403
4115	p53 signaling pathway	PREDICTED: Sus scrofa similar to LOC513497 protein (LOC100152215), mRNA	LOC100152215	AB451290.1	1026	CDKN1A	cyclin-dependent kinase inhibitor 1A (p21, Cip1)	0.132077	0	14.6628
5220	Chronic myeloid leukemia	PREDICTED: Sus scrofa similar to LOC513497 protein (LOC100152215), mRNA	LOC100152215	AB451290.1	1026	CDKN1A	cyclin-dependent kinase inhibitor 1A (p21, Cip1)	0.147973	0	13.0336
3010	Ribosome	Sus scrofa ribosomal protein L14 (RPL14), mRNA	RPL14	NM_003973.3	9045	RPL14	ribosomal protein L14	0.151927	0	12.6813
4012	ErbB signaling pathway	PREDICTED: Sus scrofa similar to LOC513497 protein (LOC100152215), mRNA	LOC100152215	AB451290.1	1026	CDKN1A	cyclin-dependent kinase inhibitor 1A (p21, Cip1)	0.151927	0	12.6813
5222	Small cell lung cancer	Sus scrofa retinoid X receptor, gamma (RXRG), mRNA	RXRG	BC012063.1	6258	RXRG	retinoid X receptor, gamma	0.155872	0	12.3476
4920	Adipocytokine signaling pathway	Sus scrofa retinoid X receptor, gamma (RXRG), mRNA	RXRG	BC012063.1	6258	RXRG	retinoid X receptor, gamma	0.167658	0	11.4441
4350	TGF-beta signaling pathway	Sus scrofa decorin (DCN), mRNA	DCN	NM_001920.3	1634	DCN	decorin	0.167658	0	11.4441
4120	Ubiquitin mediated proteolysis	BX672333 Sus Scrofa library (scac) Sus scrofa cDNA clone scac0036.j.03 5prim, mRNA sequence	CDH1					0.167658	0	11.4441
4530	Tight junction	PREDICTED: Sus scrofa similar to Actinin, alpha 2 (LOC100157406), mRNA	LOC100157406	NM_001103.2	88	ACTN2	actinin, alpha 2	0.17157	0	11.1716
4912	GnRH signaling pathway	Sus scrofa gelatinase A (MMP-2), mRNA	MMP-2	NM_004530.4	4313	MMP2	matrix metallopeptidase 2 (gelatinase A, 72kDa gelatinase, 72kDa type IV collagenase)	0.183258	0	10.4269
3320	PPAR signaling pathway	Sus scrofa retinoid X receptor, gamma (RXRG), mRNA	RXRG	BC012063.1	6258	RXRG	retinoid X receptor, gamma	0.19101	0	9.98316
230	Purine metabolism	PREDICTED: Sus scrofa similar to Guanosine monophosphate reductase 2 (LOC100154068), mRNA	LOC100154068	NM_001002000.1	51292	GMPR2	guanosine monophosphate reductase 2	0.198728	0	9.57568
4612	Antigen processing and presentation	PREDICTED: Sus scrofa heat shock 90kD protein 1, beta (HSPCB), mRNA	HSPCB	AK297367.1	3326	HSP90AB1	heat shock protein 90kDa alpha (cytosolic), class B member 1	0.198728	0	9.57568
190	Oxidative phosphorylation	PREDICTED: Sus scrofa similar to vacuolar H(+)-ATPase subunit; V-ATPase subunit; M16 (LOC100154379), mRNA	LOC100154379	NM_004888.3	9550	ATP6V1G1	ATPase, H+ transporting, lysosomal 13kDa, V1 subunit G1	0.229283	0	8.23173
4810	Regulation of actin cytoskeleton	PREDICTED: Sus scrofa similar to Actinin, alpha 2 (LOC100157406), mRNA	LOC100157406	NM_001103.2	88	ACTN2	actinin, alpha 2	0.296186	0	6.25611
4510	Focal adhesion	PREDICTED: Sus scrofa similar to Actinin, alpha 2 (LOC100157406), mRNA	LOC100157406	NM_001103.2	88	ACTN2	actinin, alpha 2	0.303465	0	6.09361
5322	Systemic lupus erythematosus	PREDICTED: Sus scrofa similar to Actinin, alpha 2 (LOC100157406), mRNA	LOC100157406	NM_001103.2	88	ACTN2	actinin, alpha 2	0.314327	0	5.8651
5010	Alzheimer's disease	PREDICTED: Sus scrofa similar to Nicastrin (LOC100156098), mRNA	LOC100156098	NM_015331.2	23385	NCSTN	nicastrin	0.317932	0	5.7927

## Sheet: LR6 vs LR5-up regulation
path_id	path_name	pig_Description	pig_Gene symbol	human_Genebank	human_Gene ID	human_Gene	human_Gene des	pvalue	FDR	enrichment
1100	Metabolic pathways	Sus scrofa enolase 3 (beta, muscle) (ENO3), mRNA	ENO3	NM_053013.2	2027	ENO3	enolase 3 (beta, muscle)	6.8678e-38	1.79944e-36	11.8146
1100	Metabolic pathways	Sus scrofa phosphofructokinase, muscle (PFKM), mRNA	PFKM	NM_000289.5	5213	PFKM	phosphofructokinase, muscle	6.8678e-38	1.79944e-36	11.8146
1100	Metabolic pathways	Sus scrofa creatine kinase, mitochondrial 2 (sarcomeric) (CKMT2), nuclear gene encoding mitochondrial protein, mRNA	CKMT2	NM_001099736.1	1160	CKMT2	creatine kinase, mitochondrial 2 (sarcomeric)	6.8678e-38	1.79944e-36	11.8146
1100	Metabolic pathways	Sus scrofa NADH dehydrogenase 1 beta subcomplex 6 (LOC733605), mRNA	LOC733605	AK289702.1	4712	NDUFB6	NADH dehydrogenase (ubiquinone) 1 beta subcomplex, 6, 17kDa	6.8678e-38	1.79944e-36	11.8146
1100	Metabolic pathways	Sus scrofa ATP synthase H+-transporting mitochondrial F1 complex O subunit (LOC733678), nuclear gene encoding mitochondrial protein, mRNA	LOC733678	NM_001697.2	539	ATP5O	ATP synthase, H+ transporting, mitochondrial F1 complex, O subunit	6.8678e-38	1.79944e-36	11.8146
1100	Metabolic pathways	Sus scrofa mRNA, clone:AMP010005E06, expressed in alveolar macrophage	LOC100155893	AK312484.1	384	ARG2	arginase, type II	6.8678e-38	1.79944e-36	11.8146
1100	Metabolic pathways	Sus scrofa adenylosuccinate synthase like 1 (ADSSL1), mRNA	ADSSL1	BC047904.1	122622	ADSSL1	adenylosuccinate synthase like 1	6.8678e-38	1.79944e-36	11.8146
1100	Metabolic pathways	Sus scrofa cytochrome c oxidase subunit VIIc (COX7C), nuclear gene encoding mitochondrial protein, mRNA	COX7C	NM_001867.2	1350	COX7C	cytochrome c oxidase subunit VIIc	6.8678e-38	1.79944e-36	11.8146
1100	Metabolic pathways	Sus scrofa succinate dehydrogenase complex, subunit D, integral membrane protein (SDHD), nuclear gene encoding mitochondrial protein, mRNA	SDHD	BC012603.1	6392	SDHD	succinate dehydrogenase complex, subunit D, integral membrane protein	6.8678e-38	1.79944e-36	11.8146
1100	Metabolic pathways	Sus scrofa isocitrate dehydrogenase 3 (NAD+) beta (IDH3B), nuclear gene encoding mitochondrial protein, mRNA	IDH3B	BX647393.1	3420	IDH3B	isocitrate dehydrogenase 3 (NAD+) beta	6.8678e-38	1.79944e-36	11.8146
1100	Metabolic pathways	Sus scrofa phosphoglycerate kinase 1 (PGK1), mRNA	PGK1	NM_000291.3	5230	PGK1	phosphoglycerate kinase 1	6.8678e-38	1.79944e-36	11.8146
1100	Metabolic pathways	Sus scrofa lactate dehydrogenase B (LDHB), mRNA	LDHB	NM_002300.5	3945	LDHB	lactate dehydrogenase B	6.8678e-38	1.79944e-36	11.8146
1100	Metabolic pathways	Sus scrofa phosphoglycerate dehydrogenase (PHGDH), mRNA	CH242-38B5.2	BC000303.2	26227	PHGDH	phosphoglycerate dehydrogenase	6.8678e-38	1.79944e-36	11.8146
1100	Metabolic pathways	Sus scrofa creatine kinase, muscle (CKM), mRNA	CKM	AK129878.1	1158	CKM	creatine kinase, muscle	6.8678e-38	1.79944e-36	11.8146
1100	Metabolic pathways	PREDICTED: Sus scrofa similar to ATP synthase, H+ transporting, mitochondrial F1 complex, alpha subunit 1, cardiac muscle (LOC100157880), mRNA	ATP5A1	AK289457.1	498	ATP5A1	ATP synthase, H+ transporting, mitochondrial F1 complex, alpha subunit 1, cardiac muscle	6.8678e-38	1.79944e-36	11.8146
1100	Metabolic pathways	PREDICTED: Sus scrofa similar to NADH dehydrogenase [ubiquinone] 1 beta subcomplex subunit 9 (NADH-ubiquinone oxidoreductase B22 subunit) (Complex I-B22) (CI-B22) (LOC100154130), mRNA	LOC100154130	AK313432.1	4715	NDUFB9	NADH dehydrogenase (ubiquinone) 1 beta subcomplex, 9, 22kDa	6.8678e-38	1.79944e-36	11.8146
1100	Metabolic pathways	PREDICTED: Sus scrofa similar to NADH dehydrogenase (ubiquinone) Fe-S protein 2, 49kDa (NADH-coenzyme Q reductase) (LOC100156075), mRNA	LOC100156075	NM_004550.4	4720	NDUFS2	NADH dehydrogenase (ubiquinone) Fe-S protein 2, 49kDa (NADH-coenzyme Q reductase)	6.8678e-38	1.79944e-36	11.8146
1100	Metabolic pathways	PREDICTED: Sus scrofa similar to Phosphatidylserine synthase 1 (LOC100156809), mRNA	LOC100156809	BC002376.2	9791	PTDSS1	phosphatidylserine synthase 1	6.8678e-38	1.79944e-36	11.8146
1100	Metabolic pathways	PREDICTED: Sus scrofa similar to ATP synthase subunit beta, mitochondrial (LOC100157156), mRNA	LOC100157156	CR600201.1	506	ATP5B	ATP synthase, H+ transporting, mitochondrial F1 complex, beta polypeptide	6.8678e-38	1.79944e-36	11.8146
1100	Metabolic pathways	PREDICTED: Sus scrofa similar to Serine hydroxymethyltransferase 2 (mitochondrial) (LOC100152340), mRNA	LOC100152340	NM_005412.5	6472	SHMT2	serine hydroxymethyltransferase 2 (mitochondrial)	6.8678e-38	1.79944e-36	11.8146
1100	Metabolic pathways	PREDICTED: Sus scrofa similar to arginase, type II (LOC100155893), mRNA	LOC100155893	NM_001172.3	384	ARG2	arginase, type II	6.8678e-38	1.79944e-36	11.8146
1100	Metabolic pathways	PREDICTED: Sus scrofa similar to pyruvate kinase 3, transcript variant 2 (LOC100158154), mRNA	PKM2	BC007640.1	5315	PKM2	pyruvate kinase, muscle	6.8678e-38	1.79944e-36	11.8146
1100	Metabolic pathways	PREDICTED: Sus scrofa similar to pyruvate kinase 3, transcript variant 3 (LOC100158154), mRNA	PKM2	AK309781.1	5315	PKM2	pyruvate kinase, muscle	6.8678e-38	1.79944e-36	11.8146
1100	Metabolic pathways	PREDICTED: Sus scrofa phosphoenolpyruvate carboxykinase 2 (PCK2), mRNA	PCK2	AK129934.1	5106	PCK2	phosphoenolpyruvate carboxykinase 2 (mitochondrial)	6.8678e-38	1.79944e-36	11.8146
1100	Metabolic pathways	PREDICTED: Sus scrofa similar to Isocitrate dehydrogenase 3 (NAD+) alpha (LOC100157242), mRNA	LOC100157242	NM_005530.2	3419	IDH3A	isocitrate dehydrogenase 3 (NAD+) alpha	6.8678e-38	1.79944e-36	11.8146
1100	Metabolic pathways	PREDICTED: Sus scrofa similar to coenzyme Q5 homolog, methyltransferase (LOC100157055), mRNA	LOC100157055	NM_032314.3	84274	COQ5	coenzyme Q5 homolog, methyltransferase (S. cerevisiae)	6.8678e-38	1.79944e-36	11.8146
1100	Metabolic pathways	PREDICTED: Sus scrofa similar to Acetyl-CoA carboxylase 2 (ACC-beta) (LOC100154993), mRNA	LOC100154993	AJ575592.3	32	ACACB	acetyl-Coenzyme A carboxylase beta	6.8678e-38	1.79944e-36	11.8146
1100	Metabolic pathways	Sus scrofa phosphoglycerate mutase 2 (PGAM2), mRNA	PGAM2	NM_000290.3	5224	PGAM2	phosphoglycerate mutase 2 (muscle)	6.8678e-38	1.79944e-36	11.8146
1100	Metabolic pathways	Sus scrofa glutamine synthetase mRNA, partial cds	GLUL	NM_001033056.2	2752	GLUL	glutamate-ammonia ligase (glutamine synthetase)	6.8678e-38	1.79944e-36	11.8146
1100	Metabolic pathways	Sus scrofa glutamic-oxaloacetic transaminase 2, mitochondrial (aspartate aminotransferase 2) (GOT2), nuclear gene encoding mitochondrial protein, mRNA	GOT2	NM_002080.2	2806	GOT2	glutamic-oxaloacetic transaminase 2, mitochondrial (aspartate aminotransferase 2)	6.8678e-38	1.79944e-36	11.8146
1100	Metabolic pathways	Sus scrofa cytosolic aspartate aminotransferase (CASPAT), mRNA	CASPAT	NM_002079.2	2805	GOT1	glutamic-oxaloacetic transaminase 1, soluble (aspartate aminotransferase 1)	6.8678e-38	1.79944e-36	11.8146
1100	Metabolic pathways	Sus scrofa acyl-Coenzyme A dehydrogenase, C-2 to C-3 short chain (ACADS), nuclear gene encoding mitochondrial protein, mRNA	ACADS	NM_000017.2	35	ACADS	acyl-Coenzyme A dehydrogenase, C-2 to C-3 short chain	6.8678e-38	1.79944e-36	11.8146
1100	Metabolic pathways	Sus scrofa aminoacylase 1 (ACY1), mRNA	ACY1	BC000545.2	95	ACY1	aminoacylase 1	6.8678e-38	1.79944e-36	11.8146
1100	Metabolic pathways	Sus scrofa acyl-Coenzyme A dehydrogenase, long chain (ACADL), nuclear gene encoding mitochondrial protein, mRNA	ACADL	NM_001608.3	33	ACADL	acyl-Coenzyme A dehydrogenase, long chain	6.8678e-38	1.79944e-36	11.8146
1100	Metabolic pathways	Sus scrofa aconitase 2, mitochondrial (ACO2), nuclear gene encoding mitochondrial protein, mRNA	ACO2	BC014092.2	50	ACO2	aconitase 2, mitochondrial	6.8678e-38	1.79944e-36	11.8146
1100	Metabolic pathways	Sus scrofa hydroxyacyl-Coenzyme A dehydrogenase/3-ketoacyl-Coenzyme A thiolase/enoyl-Coenzyme A hydratase (trifunctional protein), alpha subunit (HADHA), nuclear gene encoding mitochondrial protein, mRNA	HADHA	NM_000182.4	3030	HADHA	hydroxyacyl-Coenzyme A dehydrogenase/3-ketoacyl-Coenzyme A thiolase/enoyl-Coenzyme A hydratase (trifunctional protein), alpha subunit	6.8678e-38	1.79944e-36	11.8146
1100	Metabolic pathways	Sus scrofa UDP-glucose pyrophosphorylase 2 (UGP2), mRNA	UGP2	BC000173.2	7360	UGP2	UDP-glucose pyrophosphorylase 2	6.8678e-38	1.79944e-36	11.8146
1100	Metabolic pathways	Sus scrofa acyl-Coenzyme A dehydrogenase, C-4 to C-12 straight chain (ACADM), nuclear gene encoding mitochondrial protein, mRNA	ACADM	NM_000016.4	34	ACADM	acyl-Coenzyme A dehydrogenase, C-4 to C-12 straight chain	6.8678e-38	1.79944e-36	11.8146
1100	Metabolic pathways	Sus scrofa dihydrolipoamide dehydrogenase (DLD), mRNA	DLD	NM_000108.3	1738	DLD	dihydrolipoamide dehydrogenase	6.8678e-38	1.79944e-36	11.8146
1100	Metabolic pathways	Sus scrofa citrate synthase (CS), nuclear gene encoding mitochondrial protein, mRNA	CS	BC072016.1	1431	CS	citrate synthase	6.8678e-38	1.79944e-36	11.8146
1100	Metabolic pathways	Sus scrofa hydroxysteroid (17-beta) dehydrogenase 4 (HSD17B4), mRNA	HSD17B4	NM_000414.2	3295	HSD17B4	hydroxysteroid (17-beta) dehydrogenase 4	6.8678e-38	1.79944e-36	11.8146
1100	Metabolic pathways	Sus scrofa glucose phosphate isomerase (GPI), mRNA	GPI	NM_000175.2	2821	GPI	glucose phosphate isomerase	6.8678e-38	1.79944e-36	11.8146
1100	Metabolic pathways	Sus scrofa L-3-hydroxyacyl-CoA dehydrogenase (HAD), mRNA	HAD	NM_005327.2	3033	HADH	hydroxyacyl-Coenzyme A dehydrogenase	6.8678e-38	1.79944e-36	11.8146
1100	Metabolic pathways	Sus scrofa dihydrolipoamide S-succinyltransferase (E2 component of 2-oxo-glutarate complex) (DLST), mRNA	DLST	BC001922.1	1743	DLST	dihydrolipoamide S-succinyltransferase (E2 component of 2-oxo-glutarate complex)	6.8678e-38	1.79944e-36	11.8146
1100	Metabolic pathways	Sus scrofa succinate-CoA ligase, alpha subunit (SUCLG1), mRNA	SUCLG1	NM_003849.2	8802	SUCLG1	succinate-CoA ligase, alpha subunit	6.8678e-38	1.79944e-36	11.8146
1100	Metabolic pathways	Sus scrofa cytochrome P450 2B22 (CYP2B22), mRNA	CYP2B22	NR_001278.1	1556	CYP2B7P1	cytochrome P450, family 2, subfamily B, polypeptide 7 pseudogene 1	6.8678e-38	1.79944e-36	11.8146
1100	Metabolic pathways	Sus scrofa catalase (CAT), mRNA	CAT	NM_001752.3	847	CAT	catalase	6.8678e-38	1.79944e-36	11.8146
1100	Metabolic pathways	Sus scrofa clone Clu_71225.scr.msk.p1.Contig1, mRNA sequence	PLA2G7	NM_005084.3	7941	PLA2G7	phospholipase A2, group VII (platelet-activating factor acetylhydrolase, plasma)	6.8678e-38	1.79944e-36	11.8146
1100	Metabolic pathways	Sus scrofa S-adenosylhomocysteine hydrolase (AHCY), mRNA	AHCY	NM_000687.2	191	AHCY	adenosylhomocysteinase	6.8678e-38	1.79944e-36	11.8146
1100	Metabolic pathways	Sus scrofa O-linked N-acetylglucosamine (GlcNAc) transferase (UDP-N-acetylglucosamine:polypeptide-N-acetylglucosaminyl transferase) (OGT), mRNA	OGT	NM_181672.2	8473	OGT	O-linked N-acetylglucosamine (GlcNAc) transferase (UDP-N-acetylglucosamine:polypeptide-N-acetylglucosaminyl transferase)	6.8678e-38	1.79944e-36	11.8146
1100	Metabolic pathways	PREDICTED: Sus scrofa similar to lysophosphatidic acid acyltransferase zeta (LOC100152836), mRNA	AGPAT6					6.8678e-38	1.79944e-36	11.8146
1100	Metabolic pathways	1139821 MARC 4PIG Sus scrofa cDNA 3', mRNA sequence	COX7C					6.8678e-38	1.79944e-36	11.8146
1100	Metabolic pathways	EST0132-1 Swine Lambda TriplEx2 Library Sus scrofa cDNA clone 5-6 3' similar to ATP synthase,mitochondrial F1 complex,O subunit (ATP5O), mRNA sequence	LOC733678					6.8678e-38	1.79944e-36	11.8146
1064	Biosynthesis of alkaloids derived from ornithine, lysine and nicotinic acid	Sus scrofa enolase 3 (beta, muscle) (ENO3), mRNA	ENO3	NM_053013.2	2027	ENO3	enolase 3 (beta, muscle)	7.05384e-29	9.24092e-28	60.3268
1064	Biosynthesis of alkaloids derived from ornithine, lysine and nicotinic acid	Sus scrofa phosphofructokinase, muscle (PFKM), mRNA	PFKM	NM_000289.5	5213	PFKM	phosphofructokinase, muscle	7.05384e-29	9.24092e-28	60.3268
1064	Biosynthesis of alkaloids derived from ornithine, lysine and nicotinic acid	Sus scrofa mRNA, clone:AMP010005E06, expressed in alveolar macrophage	LOC100155893	AK312484.1	384	ARG2	arginase, type II	7.05384e-29	9.24092e-28	60.3268
1064	Biosynthesis of alkaloids derived from ornithine, lysine and nicotinic acid	Sus scrofa succinate dehydrogenase complex, subunit D, integral membrane protein (SDHD), nuclear gene encoding mitochondrial protein, mRNA	SDHD	BC012603.1	6392	SDHD	succinate dehydrogenase complex, subunit D, integral membrane protein	7.05384e-29	9.24092e-28	60.3268
1064	Biosynthesis of alkaloids derived from ornithine, lysine and nicotinic acid	Sus scrofa isocitrate dehydrogenase 3 (NAD+) beta (IDH3B), nuclear gene encoding mitochondrial protein, mRNA	IDH3B	BX647393.1	3420	IDH3B	isocitrate dehydrogenase 3 (NAD+) beta	7.05384e-29	9.24092e-28	60.3268
1064	Biosynthesis of alkaloids derived from ornithine, lysine and nicotinic acid	Sus scrofa phosphoglycerate kinase 1 (PGK1), mRNA	PGK1	NM_000291.3	5230	PGK1	phosphoglycerate kinase 1	7.05384e-29	9.24092e-28	60.3268
1064	Biosynthesis of alkaloids derived from ornithine, lysine and nicotinic acid	PREDICTED: Sus scrofa similar to arginase, type II (LOC100155893), mRNA	LOC100155893	NM_001172.3	384	ARG2	arginase, type II	7.05384e-29	9.24092e-28	60.3268
1064	Biosynthesis of alkaloids derived from ornithine, lysine and nicotinic acid	PREDICTED: Sus scrofa similar to pyruvate kinase 3, transcript variant 2 (LOC100158154), mRNA	PKM2	BC007640.1	5315	PKM2	pyruvate kinase, muscle	7.05384e-29	9.24092e-28	60.3268
1064	Biosynthesis of alkaloids derived from ornithine, lysine and nicotinic acid	PREDICTED: Sus scrofa similar to pyruvate kinase 3, transcript variant 3 (LOC100158154), mRNA	PKM2	AK309781.1	5315	PKM2	pyruvate kinase, muscle	7.05384e-29	9.24092e-28	60.3268
1064	Biosynthesis of alkaloids derived from ornithine, lysine and nicotinic acid	PREDICTED: Sus scrofa similar to Isocitrate dehydrogenase 3 (NAD+) alpha (LOC100157242), mRNA	LOC100157242	NM_005530.2	3419	IDH3A	isocitrate dehydrogenase 3 (NAD+) alpha	7.05384e-29	9.24092e-28	60.3268
1064	Biosynthesis of alkaloids derived from ornithine, lysine and nicotinic acid	Sus scrofa phosphoglycerate mutase 2 (PGAM2), mRNA	PGAM2	NM_000290.3	5224	PGAM2	phosphoglycerate mutase 2 (muscle)	7.05384e-29	9.24092e-28	60.3268
1064	Biosynthesis of alkaloids derived from ornithine, lysine and nicotinic acid	Sus scrofa glutamic-oxaloacetic transaminase 2, mitochondrial (aspartate aminotransferase 2) (GOT2), nuclear gene encoding mitochondrial protein, mRNA	GOT2	NM_002080.2	2806	GOT2	glutamic-oxaloacetic transaminase 2, mitochondrial (aspartate aminotransferase 2)	7.05384e-29	9.24092e-28	60.3268
1064	Biosynthesis of alkaloids derived from ornithine, lysine and nicotinic acid	Sus scrofa cytosolic aspartate aminotransferase (CASPAT), mRNA	CASPAT	NM_002079.2	2805	GOT1	glutamic-oxaloacetic transaminase 1, soluble (aspartate aminotransferase 1)	7.05384e-29	9.24092e-28	60.3268
1064	Biosynthesis of alkaloids derived from ornithine, lysine and nicotinic acid	Sus scrofa aminoacylase 1 (ACY1), mRNA	ACY1	BC000545.2	95	ACY1	aminoacylase 1	7.05384e-29	9.24092e-28	60.3268
1064	Biosynthesis of alkaloids derived from ornithine, lysine and nicotinic acid	Sus scrofa aconitase 2, mitochondrial (ACO2), nuclear gene encoding mitochondrial protein, mRNA	ACO2	BC014092.2	50	ACO2	aconitase 2, mitochondrial	7.05384e-29	9.24092e-28	60.3268
1064	Biosynthesis of alkaloids derived from ornithine, lysine and nicotinic acid	Sus scrofa dihydrolipoamide dehydrogenase (DLD), mRNA	DLD	NM_000108.3	1738	DLD	dihydrolipoamide dehydrogenase	7.05384e-29	9.24092e-28	60.3268
1064	Biosynthesis of alkaloids derived from ornithine, lysine and nicotinic acid	Sus scrofa citrate synthase (CS), nuclear gene encoding mitochondrial protein, mRNA	CS	BC072016.1	1431	CS	citrate synthase	7.05384e-29	9.24092e-28	60.3268
1064	Biosynthesis of alkaloids derived from ornithine, lysine and nicotinic acid	Sus scrofa glucose phosphate isomerase (GPI), mRNA	GPI	NM_000175.2	2821	GPI	glucose phosphate isomerase	7.05384e-29	9.24092e-28	60.3268
1064	Biosynthesis of alkaloids derived from ornithine, lysine and nicotinic acid	Sus scrofa dihydrolipoamide S-succinyltransferase (E2 component of 2-oxo-glutarate complex) (DLST), mRNA	DLST	BC001922.1	1743	DLST	dihydrolipoamide S-succinyltransferase (E2 component of 2-oxo-glutarate complex)	7.05384e-29	9.24092e-28	60.3268
1064	Biosynthesis of alkaloids derived from ornithine, lysine and nicotinic acid	Sus scrofa succinate-CoA ligase, alpha subunit (SUCLG1), mRNA	SUCLG1	NM_003849.2	8802	SUCLG1	succinate-CoA ligase, alpha subunit	7.05384e-29	9.24092e-28	60.3268
1070	Biosynthesis of plant hormones	Sus scrofa enolase 3 (beta, muscle) (ENO3), mRNA	ENO3	NM_053013.2	2027	ENO3	enolase 3 (beta, muscle)	3.28532e-22	2.8693e-21	41.2491
1070	Biosynthesis of plant hormones	Sus scrofa phosphofructokinase, muscle (PFKM), mRNA	PFKM	NM_000289.5	5213	PFKM	phosphofructokinase, muscle	3.28532e-22	2.8693e-21	41.2491
1070	Biosynthesis of plant hormones	Sus scrofa succinate dehydrogenase complex, subunit D, integral membrane protein (SDHD), nuclear gene encoding mitochondrial protein, mRNA	SDHD	BC012603.1	6392	SDHD	succinate dehydrogenase complex, subunit D, integral membrane protein	3.28532e-22	2.8693e-21	41.2491
1070	Biosynthesis of plant hormones	Sus scrofa isocitrate dehydrogenase 3 (NAD+) beta (IDH3B), nuclear gene encoding mitochondrial protein, mRNA	IDH3B	BX647393.1	3420	IDH3B	isocitrate dehydrogenase 3 (NAD+) beta	3.28532e-22	2.8693e-21	41.2491
1070	Biosynthesis of plant hormones	Sus scrofa phosphoglycerate kinase 1 (PGK1), mRNA	PGK1	NM_000291.3	5230	PGK1	phosphoglycerate kinase 1	3.28532e-22	2.8693e-21	41.2491
1070	Biosynthesis of plant hormones	PREDICTED: Sus scrofa similar to pyruvate kinase 3, transcript variant 2 (LOC100158154), mRNA	PKM2	BC007640.1	5315	PKM2	pyruvate kinase, muscle	3.28532e-22	2.8693e-21	41.2491
1070	Biosynthesis of plant hormones	PREDICTED: Sus scrofa similar to pyruvate kinase 3, transcript variant 3 (LOC100158154), mRNA	PKM2	AK309781.1	5315	PKM2	pyruvate kinase, muscle	3.28532e-22	2.8693e-21	41.2491
1070	Biosynthesis of plant hormones	PREDICTED: Sus scrofa similar to Isocitrate dehydrogenase 3 (NAD+) alpha (LOC100157242), mRNA	LOC100157242	NM_005530.2	3419	IDH3A	isocitrate dehydrogenase 3 (NAD+) alpha	3.28532e-22	2.8693e-21	41.2491
1070	Biosynthesis of plant hormones	Sus scrofa phosphoglycerate mutase 2 (PGAM2), mRNA	PGAM2	NM_000290.3	5224	PGAM2	phosphoglycerate mutase 2 (muscle)	3.28532e-22	2.8693e-21	41.2491
1070	Biosynthesis of plant hormones	Sus scrofa glutamic-oxaloacetic transaminase 2, mitochondrial (aspartate aminotransferase 2) (GOT2), nuclear gene encoding mitochondrial protein, mRNA	GOT2	NM_002080.2	2806	GOT2	glutamic-oxaloacetic transaminase 2, mitochondrial (aspartate aminotransferase 2)	3.28532e-22	2.8693e-21	41.2491
1070	Biosynthesis of plant hormones	Sus scrofa cytosolic aspartate aminotransferase (CASPAT), mRNA	CASPAT	NM_002079.2	2805	GOT1	glutamic-oxaloacetic transaminase 1, soluble (aspartate aminotransferase 1)	3.28532e-22	2.8693e-21	41.2491
1070	Biosynthesis of plant hormones	Sus scrofa aconitase 2, mitochondrial (ACO2), nuclear gene encoding mitochondrial protein, mRNA	ACO2	BC014092.2	50	ACO2	aconitase 2, mitochondrial	3.28532e-22	2.8693e-21	41.2491
1070	Biosynthesis of plant hormones	Sus scrofa dihydrolipoamide dehydrogenase (DLD), mRNA	DLD	NM_000108.3	1738	DLD	dihydrolipoamide dehydrogenase	3.28532e-22	2.8693e-21	41.2491
1070	Biosynthesis of plant hormones	Sus scrofa citrate synthase (CS), nuclear gene encoding mitochondrial protein, mRNA	CS	BC072016.1	1431	CS	citrate synthase	3.28532e-22	2.8693e-21	41.2491
1070	Biosynthesis of plant hormones	Sus scrofa glucose phosphate isomerase (GPI), mRNA	GPI	NM_000175.2	2821	GPI	glucose phosphate isomerase	3.28532e-22	2.8693e-21	41.2491
1070	Biosynthesis of plant hormones	Sus scrofa dihydrolipoamide S-succinyltransferase (E2 component of 2-oxo-glutarate complex) (DLST), mRNA	DLST	BC001922.1	1743	DLST	dihydrolipoamide S-succinyltransferase (E2 component of 2-oxo-glutarate complex)	3.28532e-22	2.8693e-21	41.2491
1070	Biosynthesis of plant hormones	Sus scrofa succinate-CoA ligase, alpha subunit (SUCLG1), mRNA	SUCLG1	NM_003849.2	8802	SUCLG1	succinate-CoA ligase, alpha subunit	3.28532e-22	2.8693e-21	41.2491
1065	Biosynthesis of alkaloids derived from histidine and purine	Sus scrofa enolase 3 (beta, muscle) (ENO3), mRNA	ENO3	NM_053013.2	2027	ENO3	enolase 3 (beta, muscle)	1.01635e-21	5.48172e-21	45.7021
1065	Biosynthesis of alkaloids derived from histidine and purine	Sus scrofa phosphofructokinase, muscle (PFKM), mRNA	PFKM	NM_000289.5	5213	PFKM	phosphofructokinase, muscle	1.01635e-21	5.48172e-21	45.7021
1065	Biosynthesis of alkaloids derived from histidine and purine	Sus scrofa adenylosuccinate synthase like 1 (ADSSL1), mRNA	ADSSL1	BC047904.1	122622	ADSSL1	adenylosuccinate synthase like 1	1.01635e-21	5.48172e-21	45.7021
1065	Biosynthesis of alkaloids derived from histidine and purine	Sus scrofa succinate dehydrogenase complex, subunit D, integral membrane protein (SDHD), nuclear gene encoding mitochondrial protein, mRNA	SDHD	BC012603.1	6392	SDHD	succinate dehydrogenase complex, subunit D, integral membrane protein	1.01635e-21	5.48172e-21	45.7021
1065	Biosynthesis of alkaloids derived from histidine and purine	Sus scrofa isocitrate dehydrogenase 3 (NAD+) beta (IDH3B), nuclear gene encoding mitochondrial protein, mRNA	IDH3B	BX647393.1	3420	IDH3B	isocitrate dehydrogenase 3 (NAD+) beta	1.01635e-21	5.48172e-21	45.7021
1065	Biosynthesis of alkaloids derived from histidine and purine	Sus scrofa phosphoglycerate kinase 1 (PGK1), mRNA	PGK1	NM_000291.3	5230	PGK1	phosphoglycerate kinase 1	1.01635e-21	5.48172e-21	45.7021
1065	Biosynthesis of alkaloids derived from histidine and purine	PREDICTED: Sus scrofa similar to pyruvate kinase 3, transcript variant 2 (LOC100158154), mRNA	PKM2	BC007640.1	5315	PKM2	pyruvate kinase, muscle	1.01635e-21	5.48172e-21	45.7021
1065	Biosynthesis of alkaloids derived from histidine and purine	PREDICTED: Sus scrofa similar to pyruvate kinase 3, transcript variant 3 (LOC100158154), mRNA	PKM2	AK309781.1	5315	PKM2	pyruvate kinase, muscle	1.01635e-21	5.48172e-21	45.7021
1065	Biosynthesis of alkaloids derived from histidine and purine	PREDICTED: Sus scrofa similar to Isocitrate dehydrogenase 3 (NAD+) alpha (LOC100157242), mRNA	LOC100157242	NM_005530.2	3419	IDH3A	isocitrate dehydrogenase 3 (NAD+) alpha	1.01635e-21	5.48172e-21	45.7021
1065	Biosynthesis of alkaloids derived from histidine and purine	Sus scrofa phosphoglycerate mutase 2 (PGAM2), mRNA	PGAM2	NM_000290.3	5224	PGAM2	phosphoglycerate mutase 2 (muscle)	1.01635e-21	5.48172e-21	45.7021
1065	Biosynthesis of alkaloids derived from histidine and purine	Sus scrofa aconitase 2, mitochondrial (ACO2), nuclear gene encoding mitochondrial protein, mRNA	ACO2	BC014092.2	50	ACO2	aconitase 2, mitochondrial	1.01635e-21	5.48172e-21	45.7021
1065	Biosynthesis of alkaloids derived from histidine and purine	Sus scrofa dihydrolipoamide dehydrogenase (DLD), mRNA	DLD	NM_000108.3	1738	DLD	dihydrolipoamide dehydrogenase	1.01635e-21	5.48172e-21	45.7021
1065	Biosynthesis of alkaloids derived from histidine and purine	Sus scrofa citrate synthase (CS), nuclear gene encoding mitochondrial protein, mRNA	CS	BC072016.1	1431	CS	citrate synthase	1.01635e-21	5.48172e-21	45.7021
1065	Biosynthesis of alkaloids derived from histidine and purine	Sus scrofa glucose phosphate isomerase (GPI), mRNA	GPI	NM_000175.2	2821	GPI	glucose phosphate isomerase	1.01635e-21	5.48172e-21	45.7021
1065	Biosynthesis of alkaloids derived from histidine and purine	Sus scrofa dihydrolipoamide S-succinyltransferase (E2 component of 2-oxo-glutarate complex) (DLST), mRNA	DLST	BC001922.1	1743	DLST	dihydrolipoamide S-succinyltransferase (E2 component of 2-oxo-glutarate complex)	1.01635e-21	5.48172e-21	45.7021
1065	Biosynthesis of alkaloids derived from histidine and purine	Sus scrofa succinate-CoA ligase, alpha subunit (SUCLG1), mRNA	SUCLG1	NM_003849.2	8802	SUCLG1	succinate-CoA ligase, alpha subunit	1.01635e-21	5.48172e-21	45.7021
1061	Biosynthesis of phenylpropanoids	Sus scrofa enolase 3 (beta, muscle) (ENO3), mRNA	ENO3	NM_053013.2	2027	ENO3	enolase 3 (beta, muscle)	1.06897e-21	5.60163e-21	54.1394
1061	Biosynthesis of phenylpropanoids	Sus scrofa phosphofructokinase, muscle (PFKM), mRNA	PFKM	NM_000289.5	5213	PFKM	phosphofructokinase, muscle	1.06897e-21	5.60163e-21	54.1394
1061	Biosynthesis of phenylpropanoids	Sus scrofa succinate dehydrogenase complex, subunit D, integral membrane protein (SDHD), nuclear gene encoding mitochondrial protein, mRNA	SDHD	BC012603.1	6392	SDHD	succinate dehydrogenase complex, subunit D, integral membrane protein	1.06897e-21	5.60163e-21	54.1394
1061	Biosynthesis of phenylpropanoids	Sus scrofa phosphoglycerate kinase 1 (PGK1), mRNA	PGK1	NM_000291.3	5230	PGK1	phosphoglycerate kinase 1	1.06897e-21	5.60163e-21	54.1394
1061	Biosynthesis of phenylpropanoids	PREDICTED: Sus scrofa similar to pyruvate kinase 3, transcript variant 2 (LOC100158154), mRNA	PKM2	BC007640.1	5315	PKM2	pyruvate kinase, muscle	1.06897e-21	5.60163e-21	54.1394
1061	Biosynthesis of phenylpropanoids	PREDICTED: Sus scrofa similar to pyruvate kinase 3, transcript variant 3 (LOC100158154), mRNA	PKM2	AK309781.1	5315	PKM2	pyruvate kinase, muscle	1.06897e-21	5.60163e-21	54.1394
1061	Biosynthesis of phenylpropanoids	Sus scrofa phosphoglycerate mutase 2 (PGAM2), mRNA	PGAM2	NM_000290.3	5224	PGAM2	phosphoglycerate mutase 2 (muscle)	1.06897e-21	5.60163e-21	54.1394
1061	Biosynthesis of phenylpropanoids	Sus scrofa glutamic-oxaloacetic transaminase 2, mitochondrial (aspartate aminotransferase 2) (GOT2), nuclear gene encoding mitochondrial protein, mRNA	GOT2	NM_002080.2	2806	GOT2	glutamic-oxaloacetic transaminase 2, mitochondrial (aspartate aminotransferase 2)	1.06897e-21	5.60163e-21	54.1394
1061	Biosynthesis of phenylpropanoids	Sus scrofa cytosolic aspartate aminotransferase (CASPAT), mRNA	CASPAT	NM_002079.2	2805	GOT1	glutamic-oxaloacetic transaminase 1, soluble (aspartate aminotransferase 1)	1.06897e-21	5.60163e-21	54.1394
1061	Biosynthesis of phenylpropanoids	Sus scrofa aconitase 2, mitochondrial (ACO2), nuclear gene encoding mitochondrial protein, mRNA	ACO2	BC014092.2	50	ACO2	aconitase 2, mitochondrial	1.06897e-21	5.60163e-21	54.1394
1061	Biosynthesis of phenylpropanoids	Sus scrofa dihydrolipoamide dehydrogenase (DLD), mRNA	DLD	NM_000108.3	1738	DLD	dihydrolipoamide dehydrogenase	1.06897e-21	5.60163e-21	54.1394
1061	Biosynthesis of phenylpropanoids	Sus scrofa citrate synthase (CS), nuclear gene encoding mitochondrial protein, mRNA	CS	BC072016.1	1431	CS	citrate synthase	1.06897e-21	5.60163e-21	54.1394
1061	Biosynthesis of phenylpropanoids	Sus scrofa glucose phosphate isomerase (GPI), mRNA	GPI	NM_000175.2	2821	GPI	glucose phosphate isomerase	1.06897e-21	5.60163e-21	54.1394
1061	Biosynthesis of phenylpropanoids	Sus scrofa dihydrolipoamide S-succinyltransferase (E2 component of 2-oxo-glutarate complex) (DLST), mRNA	DLST	BC001922.1	1743	DLST	dihydrolipoamide S-succinyltransferase (E2 component of 2-oxo-glutarate complex)	1.06897e-21	5.60163e-21	54.1394
1061	Biosynthesis of phenylpropanoids	Sus scrofa succinate-CoA ligase, alpha subunit (SUCLG1), mRNA	SUCLG1	NM_003849.2	8802	SUCLG1	succinate-CoA ligase, alpha subunit	1.06897e-21	5.60163e-21	54.1394
1063	Biosynthesis of alkaloids derived from shikimate pathway	Sus scrofa enolase 3 (beta, muscle) (ENO3), mRNA	ENO3	NM_053013.2	2027	ENO3	enolase 3 (beta, muscle)	8.36232e-21	3.6517e-20	48.5388
1063	Biosynthesis of alkaloids derived from shikimate pathway	Sus scrofa phosphofructokinase, muscle (PFKM), mRNA	PFKM	NM_000289.5	5213	PFKM	phosphofructokinase, muscle	8.36232e-21	3.6517e-20	48.5388
1063	Biosynthesis of alkaloids derived from shikimate pathway	Sus scrofa succinate dehydrogenase complex, subunit D, integral membrane protein (SDHD), nuclear gene encoding mitochondrial protein, mRNA	SDHD	BC012603.1	6392	SDHD	succinate dehydrogenase complex, subunit D, integral membrane protein	8.36232e-21	3.6517e-20	48.5388
1063	Biosynthesis of alkaloids derived from shikimate pathway	Sus scrofa isocitrate dehydrogenase 3 (NAD+) beta (IDH3B), nuclear gene encoding mitochondrial protein, mRNA	IDH3B	BX647393.1	3420	IDH3B	isocitrate dehydrogenase 3 (NAD+) beta	8.36232e-21	3.6517e-20	48.5388
1063	Biosynthesis of alkaloids derived from shikimate pathway	Sus scrofa phosphoglycerate kinase 1 (PGK1), mRNA	PGK1	NM_000291.3	5230	PGK1	phosphoglycerate kinase 1	8.36232e-21	3.6517e-20	48.5388
1063	Biosynthesis of alkaloids derived from shikimate pathway	PREDICTED: Sus scrofa similar to pyruvate kinase 3, transcript variant 2 (LOC100158154), mRNA	PKM2	BC007640.1	5315	PKM2	pyruvate kinase, muscle	8.36232e-21	3.6517e-20	48.5388
1063	Biosynthesis of alkaloids derived from shikimate pathway	PREDICTED: Sus scrofa similar to pyruvate kinase 3, transcript variant 3 (LOC100158154), mRNA	PKM2	AK309781.1	5315	PKM2	pyruvate kinase, muscle	8.36232e-21	3.6517e-20	48.5388
1063	Biosynthesis of alkaloids derived from shikimate pathway	PREDICTED: Sus scrofa similar to Isocitrate dehydrogenase 3 (NAD+) alpha (LOC100157242), mRNA	LOC100157242	NM_005530.2	3419	IDH3A	isocitrate dehydrogenase 3 (NAD+) alpha	8.36232e-21	3.6517e-20	48.5388
1063	Biosynthesis of alkaloids derived from shikimate pathway	Sus scrofa phosphoglycerate mutase 2 (PGAM2), mRNA	PGAM2	NM_000290.3	5224	PGAM2	phosphoglycerate mutase 2 (muscle)	8.36232e-21	3.6517e-20	48.5388
1063	Biosynthesis of alkaloids derived from shikimate pathway	Sus scrofa aconitase 2, mitochondrial (ACO2), nuclear gene encoding mitochondrial protein, mRNA	ACO2	BC014092.2	50	ACO2	aconitase 2, mitochondrial	8.36232e-21	3.6517e-20	48.5388
1063	Biosynthesis of alkaloids derived from shikimate pathway	Sus scrofa dihydrolipoamide dehydrogenase (DLD), mRNA	DLD	NM_000108.3	1738	DLD	dihydrolipoamide dehydrogenase	8.36232e-21	3.6517e-20	48.5388
1063	Biosynthesis of alkaloids derived from shikimate pathway	Sus scrofa citrate synthase (CS), nuclear gene encoding mitochondrial protein, mRNA	CS	BC072016.1	1431	CS	citrate synthase	8.36232e-21	3.6517e-20	48.5388
1063	Biosynthesis of alkaloids derived from shikimate pathway	Sus scrofa glucose phosphate isomerase (GPI), mRNA	GPI	NM_000175.2	2821	GPI	glucose phosphate isomerase	8.36232e-21	3.6517e-20	48.5388
1063	Biosynthesis of alkaloids derived from shikimate pathway	Sus scrofa dihydrolipoamide S-succinyltransferase (E2 component of 2-oxo-glutarate complex) (DLST), mRNA	DLST	BC001922.1	1743	DLST	dihydrolipoamide S-succinyltransferase (E2 component of 2-oxo-glutarate complex)	8.36232e-21	3.6517e-20	48.5388
1063	Biosynthesis of alkaloids derived from shikimate pathway	Sus scrofa succinate-CoA ligase, alpha subunit (SUCLG1), mRNA	SUCLG1	NM_003849.2	8802	SUCLG1	succinate-CoA ligase, alpha subunit	8.36232e-21	3.6517e-20	48.5388
1062	Biosynthesis of terpenoids and steroids	Sus scrofa enolase 3 (beta, muscle) (ENO3), mRNA	ENO3	NM_053013.2	2027	ENO3	enolase 3 (beta, muscle)	4.95134e-20	1.83483e-19	43.9883
1062	Biosynthesis of terpenoids and steroids	Sus scrofa phosphofructokinase, muscle (PFKM), mRNA	PFKM	NM_000289.5	5213	PFKM	phosphofructokinase, muscle	4.95134e-20	1.83483e-19	43.9883
1062	Biosynthesis of terpenoids and steroids	Sus scrofa succinate dehydrogenase complex, subunit D, integral membrane protein (SDHD), nuclear gene encoding mitochondrial protein, mRNA	SDHD	BC012603.1	6392	SDHD	succinate dehydrogenase complex, subunit D, integral membrane protein	4.95134e-20	1.83483e-19	43.9883
1062	Biosynthesis of terpenoids and steroids	Sus scrofa isocitrate dehydrogenase 3 (NAD+) beta (IDH3B), nuclear gene encoding mitochondrial protein, mRNA	IDH3B	BX647393.1	3420	IDH3B	isocitrate dehydrogenase 3 (NAD+) beta	4.95134e-20	1.83483e-19	43.9883
1062	Biosynthesis of terpenoids and steroids	Sus scrofa phosphoglycerate kinase 1 (PGK1), mRNA	PGK1	NM_000291.3	5230	PGK1	phosphoglycerate kinase 1	4.95134e-20	1.83483e-19	43.9883
1062	Biosynthesis of terpenoids and steroids	PREDICTED: Sus scrofa similar to pyruvate kinase 3, transcript variant 2 (LOC100158154), mRNA	PKM2	BC007640.1	5315	PKM2	pyruvate kinase, muscle	4.95134e-20	1.83483e-19	43.9883
1062	Biosynthesis of terpenoids and steroids	PREDICTED: Sus scrofa similar to pyruvate kinase 3, transcript variant 3 (LOC100158154), mRNA	PKM2	AK309781.1	5315	PKM2	pyruvate kinase, muscle	4.95134e-20	1.83483e-19	43.9883
1062	Biosynthesis of terpenoids and steroids	PREDICTED: Sus scrofa similar to Isocitrate dehydrogenase 3 (NAD+) alpha (LOC100157242), mRNA	LOC100157242	NM_005530.2	3419	IDH3A	isocitrate dehydrogenase 3 (NAD+) alpha	4.95134e-20	1.83483e-19	43.9883
1062	Biosynthesis of terpenoids and steroids	Sus scrofa phosphoglycerate mutase 2 (PGAM2), mRNA	PGAM2	NM_000290.3	5224	PGAM2	phosphoglycerate mutase 2 (muscle)	4.95134e-20	1.83483e-19	43.9883
1062	Biosynthesis of terpenoids and steroids	Sus scrofa aconitase 2, mitochondrial (ACO2), nuclear gene encoding mitochondrial protein, mRNA	ACO2	BC014092.2	50	ACO2	aconitase 2, mitochondrial	4.95134e-20	1.83483e-19	43.9883
1062	Biosynthesis of terpenoids and steroids	Sus scrofa dihydrolipoamide dehydrogenase (DLD), mRNA	DLD	NM_000108.3	1738	DLD	dihydrolipoamide dehydrogenase	4.95134e-20	1.83483e-19	43.9883
1062	Biosynthesis of terpenoids and steroids	Sus scrofa citrate synthase (CS), nuclear gene encoding mitochondrial protein, mRNA	CS	BC072016.1	1431	CS	citrate synthase	4.95134e-20	1.83483e-19	43.9883
1062	Biosynthesis of terpenoids and steroids	Sus scrofa glucose phosphate isomerase (GPI), mRNA	GPI	NM_000175.2	2821	GPI	glucose phosphate isomerase	4.95134e-20	1.83483e-19	43.9883
1062	Biosynthesis of terpenoids and steroids	Sus scrofa dihydrolipoamide S-succinyltransferase (E2 component of 2-oxo-glutarate complex) (DLST), mRNA	DLST	BC001922.1	1743	DLST	dihydrolipoamide S-succinyltransferase (E2 component of 2-oxo-glutarate complex)	4.95134e-20	1.83483e-19	43.9883
1062	Biosynthesis of terpenoids and steroids	Sus scrofa succinate-CoA ligase, alpha subunit (SUCLG1), mRNA	SUCLG1	NM_003849.2	8802	SUCLG1	succinate-CoA ligase, alpha subunit	4.95134e-20	1.83483e-19	43.9883
1066	Biosynthesis of alkaloids derived from terpenoid and polyketide	Sus scrofa enolase 3 (beta, muscle) (ENO3), mRNA	ENO3	NM_053013.2	2027	ENO3	enolase 3 (beta, muscle)	8.5248e-20	2.79199e-19	42.6553
1066	Biosynthesis of alkaloids derived from terpenoid and polyketide	Sus scrofa phosphofructokinase, muscle (PFKM), mRNA	PFKM	NM_000289.5	5213	PFKM	phosphofructokinase, muscle	8.5248e-20	2.79199e-19	42.6553
1066	Biosynthesis of alkaloids derived from terpenoid and polyketide	Sus scrofa succinate dehydrogenase complex, subunit D, integral membrane protein (SDHD), nuclear gene encoding mitochondrial protein, mRNA	SDHD	BC012603.1	6392	SDHD	succinate dehydrogenase complex, subunit D, integral membrane protein	8.5248e-20	2.79199e-19	42.6553
1066	Biosynthesis of alkaloids derived from terpenoid and polyketide	Sus scrofa isocitrate dehydrogenase 3 (NAD+) beta (IDH3B), nuclear gene encoding mitochondrial protein, mRNA	IDH3B	BX647393.1	3420	IDH3B	isocitrate dehydrogenase 3 (NAD+) beta	8.5248e-20	2.79199e-19	42.6553
1066	Biosynthesis of alkaloids derived from terpenoid and polyketide	Sus scrofa phosphoglycerate kinase 1 (PGK1), mRNA	PGK1	NM_000291.3	5230	PGK1	phosphoglycerate kinase 1	8.5248e-20	2.79199e-19	42.6553
1066	Biosynthesis of alkaloids derived from terpenoid and polyketide	PREDICTED: Sus scrofa similar to pyruvate kinase 3, transcript variant 2 (LOC100158154), mRNA	PKM2	BC007640.1	5315	PKM2	pyruvate kinase, muscle	8.5248e-20	2.79199e-19	42.6553
1066	Biosynthesis of alkaloids derived from terpenoid and polyketide	PREDICTED: Sus scrofa similar to pyruvate kinase 3, transcript variant 3 (LOC100158154), mRNA	PKM2	AK309781.1	5315	PKM2	pyruvate kinase, muscle	8.5248e-20	2.79199e-19	42.6553
1066	Biosynthesis of alkaloids derived from terpenoid and polyketide	PREDICTED: Sus scrofa similar to Isocitrate dehydrogenase 3 (NAD+) alpha (LOC100157242), mRNA	LOC100157242	NM_005530.2	3419	IDH3A	isocitrate dehydrogenase 3 (NAD+) alpha	8.5248e-20	2.79199e-19	42.6553
1066	Biosynthesis of alkaloids derived from terpenoid and polyketide	Sus scrofa phosphoglycerate mutase 2 (PGAM2), mRNA	PGAM2	NM_000290.3	5224	PGAM2	phosphoglycerate mutase 2 (muscle)	8.5248e-20	2.79199e-19	42.6553
1066	Biosynthesis of alkaloids derived from terpenoid and polyketide	Sus scrofa aconitase 2, mitochondrial (ACO2), nuclear gene encoding mitochondrial protein, mRNA	ACO2	BC014092.2	50	ACO2	aconitase 2, mitochondrial	8.5248e-20	2.79199e-19	42.6553
1066	Biosynthesis of alkaloids derived from terpenoid and polyketide	Sus scrofa dihydrolipoamide dehydrogenase (DLD), mRNA	DLD	NM_000108.3	1738	DLD	dihydrolipoamide dehydrogenase	8.5248e-20	2.79199e-19	42.6553
1066	Biosynthesis of alkaloids derived from terpenoid and polyketide	Sus scrofa citrate synthase (CS), nuclear gene encoding mitochondrial protein, mRNA	CS	BC072016.1	1431	CS	citrate synthase	8.5248e-20	2.79199e-19	42.6553
1066	Biosynthesis of alkaloids derived from terpenoid and polyketide	Sus scrofa glucose phosphate isomerase (GPI), mRNA	GPI	NM_000175.2	2821	GPI	glucose phosphate isomerase	8.5248e-20	2.79199e-19	42.6553
1066	Biosynthesis of alkaloids derived from terpenoid and polyketide	Sus scrofa dihydrolipoamide S-succinyltransferase (E2 component of 2-oxo-glutarate complex) (DLST), mRNA	DLST	BC001922.1	1743	DLST	dihydrolipoamide S-succinyltransferase (E2 component of 2-oxo-glutarate complex)	8.5248e-20	2.79199e-19	42.6553
1066	Biosynthesis of alkaloids derived from terpenoid and polyketide	Sus scrofa succinate-CoA ligase, alpha subunit (SUCLG1), mRNA	SUCLG1	NM_003849.2	8802	SUCLG1	succinate-CoA ligase, alpha subunit	8.5248e-20	2.79199e-19	42.6553
20	Citrate cycle (TCA cycle)	Sus scrofa succinate dehydrogenase complex, subunit D, integral membrane protein (SDHD), nuclear gene encoding mitochondrial protein, mRNA	SDHD	BC012603.1	6392	SDHD	succinate dehydrogenase complex, subunit D, integral membrane protein	3.67786e-14	1.07071e-13	53.2295
20	Citrate cycle (TCA cycle)	Sus scrofa isocitrate dehydrogenase 3 (NAD+) beta (IDH3B), nuclear gene encoding mitochondrial protein, mRNA	IDH3B	BX647393.1	3420	IDH3B	isocitrate dehydrogenase 3 (NAD+) beta	3.67786e-14	1.07071e-13	53.2295
20	Citrate cycle (TCA cycle)	PREDICTED: Sus scrofa phosphoenolpyruvate carboxykinase 2 (PCK2), mRNA	PCK2	AK129934.1	5106	PCK2	phosphoenolpyruvate carboxykinase 2 (mitochondrial)	3.67786e-14	1.07071e-13	53.2295
20	Citrate cycle (TCA cycle)	PREDICTED: Sus scrofa similar to Isocitrate dehydrogenase 3 (NAD+) alpha (LOC100157242), mRNA	LOC100157242	NM_005530.2	3419	IDH3A	isocitrate dehydrogenase 3 (NAD+) alpha	3.67786e-14	1.07071e-13	53.2295
20	Citrate cycle (TCA cycle)	Sus scrofa aconitase 2, mitochondrial (ACO2), nuclear gene encoding mitochondrial protein, mRNA	ACO2	BC014092.2	50	ACO2	aconitase 2, mitochondrial	3.67786e-14	1.07071e-13	53.2295
20	Citrate cycle (TCA cycle)	Sus scrofa dihydrolipoamide dehydrogenase (DLD), mRNA	DLD	NM_000108.3	1738	DLD	dihydrolipoamide dehydrogenase	3.67786e-14	1.07071e-13	53.2295
20	Citrate cycle (TCA cycle)	Sus scrofa citrate synthase (CS), nuclear gene encoding mitochondrial protein, mRNA	CS	BC072016.1	1431	CS	citrate synthase	3.67786e-14	1.07071e-13	53.2295
20	Citrate cycle (TCA cycle)	Sus scrofa dihydrolipoamide S-succinyltransferase (E2 component of 2-oxo-glutarate complex) (DLST), mRNA	DLST	BC001922.1	1743	DLST	dihydrolipoamide S-succinyltransferase (E2 component of 2-oxo-glutarate complex)	3.67786e-14	1.07071e-13	53.2295
20	Citrate cycle (TCA cycle)	Sus scrofa succinate-CoA ligase, alpha subunit (SUCLG1), mRNA	SUCLG1	NM_003849.2	8802	SUCLG1	succinate-CoA ligase, alpha subunit	3.67786e-14	1.07071e-13	53.2295
10	Glycolysis / Gluconeogenesis	Sus scrofa enolase 3 (beta, muscle) (ENO3), mRNA	ENO3	NM_053013.2	2027	ENO3	enolase 3 (beta, muscle)	1.86219e-12	4.87915e-12	37.7042
10	Glycolysis / Gluconeogenesis	Sus scrofa phosphofructokinase, muscle (PFKM), mRNA	PFKM	NM_000289.5	5213	PFKM	phosphofructokinase, muscle	1.86219e-12	4.87915e-12	37.7042
10	Glycolysis / Gluconeogenesis	Sus scrofa phosphoglycerate kinase 1 (PGK1), mRNA	PGK1	NM_000291.3	5230	PGK1	phosphoglycerate kinase 1	1.86219e-12	4.87915e-12	37.7042
10	Glycolysis / Gluconeogenesis	Sus scrofa lactate dehydrogenase B (LDHB), mRNA	LDHB	NM_002300.5	3945	LDHB	lactate dehydrogenase B	1.86219e-12	4.87915e-12	37.7042
10	Glycolysis / Gluconeogenesis	PREDICTED: Sus scrofa similar to pyruvate kinase 3, transcript variant 2 (LOC100158154), mRNA	PKM2	BC007640.1	5315	PKM2	pyruvate kinase, muscle	1.86219e-12	4.87915e-12	37.7042
10	Glycolysis / Gluconeogenesis	PREDICTED: Sus scrofa similar to pyruvate kinase 3, transcript variant 3 (LOC100158154), mRNA	PKM2	AK309781.1	5315	PKM2	pyruvate kinase, muscle	1.86219e-12	4.87915e-12	37.7042
10	Glycolysis / Gluconeogenesis	PREDICTED: Sus scrofa phosphoenolpyruvate carboxykinase 2 (PCK2), mRNA	PCK2	AK129934.1	5106	PCK2	phosphoenolpyruvate carboxykinase 2 (mitochondrial)	1.86219e-12	4.87915e-12	37.7042
10	Glycolysis / Gluconeogenesis	Sus scrofa phosphoglycerate mutase 2 (PGAM2), mRNA	PGAM2	NM_000290.3	5224	PGAM2	phosphoglycerate mutase 2 (muscle)	1.86219e-12	4.87915e-12	37.7042
10	Glycolysis / Gluconeogenesis	Sus scrofa dihydrolipoamide dehydrogenase (DLD), mRNA	DLD	NM_000108.3	1738	DLD	dihydrolipoamide dehydrogenase	1.86219e-12	4.87915e-12	37.7042
10	Glycolysis / Gluconeogenesis	Sus scrofa glucose phosphate isomerase (GPI), mRNA	GPI	NM_000175.2	2821	GPI	glucose phosphate isomerase	1.86219e-12	4.87915e-12	37.7042
5016	Huntington's disease	Sus scrofa NADH dehydrogenase 1 beta subcomplex 6 (LOC733605), mRNA	LOC733605	AK289702.1	4712	NDUFB6	NADH dehydrogenase (ubiquinone) 1 beta subcomplex, 6, 17kDa	8.92933e-12	2.12689e-11	17.2362
5016	Huntington's disease	Sus scrofa ATP synthase H+-transporting mitochondrial F1 complex O subunit (LOC733678), nuclear gene encoding mitochondrial protein, mRNA	LOC733678	NM_001697.2	539	ATP5O	ATP synthase, H+ transporting, mitochondrial F1 complex, O subunit	8.92933e-12	2.12689e-11	17.2362
5016	Huntington's disease	Sus scrofa cytochrome c oxidase subunit VIIc (COX7C), nuclear gene encoding mitochondrial protein, mRNA	COX7C	NM_001867.2	1350	COX7C	cytochrome c oxidase subunit VIIc	8.92933e-12	2.12689e-11	17.2362
5016	Huntington's disease	Sus scrofa succinate dehydrogenase complex, subunit D, integral membrane protein (SDHD), nuclear gene encoding mitochondrial protein, mRNA	SDHD	BC012603.1	6392	SDHD	succinate dehydrogenase complex, subunit D, integral membrane protein	8.92933e-12	2.12689e-11	17.2362
5016	Huntington's disease	PREDICTED: Sus scrofa similar to manganese superoxide dismutase (LOC100154319), mRNA	SOD2	AK296809.1	6648	SOD2	superoxide dismutase 2, mitochondrial	8.92933e-12	2.12689e-11	17.2362
5016	Huntington's disease	PREDICTED: Sus scrofa similar to ATP synthase, H+ transporting, mitochondrial F1 complex, alpha subunit 1, cardiac muscle (LOC100157880), mRNA	ATP5A1	AK289457.1	498	ATP5A1	ATP synthase, H+ transporting, mitochondrial F1 complex, alpha subunit 1, cardiac muscle	8.92933e-12	2.12689e-11	17.2362
5016	Huntington's disease	PREDICTED: Sus scrofa similar to NADH dehydrogenase [ubiquinone] 1 beta subcomplex subunit 9 (NADH-ubiquinone oxidoreductase B22 subunit) (Complex I-B22) (CI-B22) (LOC100154130), mRNA	LOC100154130	AK313432.1	4715	NDUFB9	NADH dehydrogenase (ubiquinone) 1 beta subcomplex, 9, 22kDa	8.92933e-12	2.12689e-11	17.2362
5016	Huntington's disease	PREDICTED: Sus scrofa similar to NADH dehydrogenase (ubiquinone) Fe-S protein 2, 49kDa (NADH-coenzyme Q reductase) (LOC100156075), mRNA	LOC100156075	NM_004550.4	4720	NDUFS2	NADH dehydrogenase (ubiquinone) Fe-S protein 2, 49kDa (NADH-coenzyme Q reductase)	8.92933e-12	2.12689e-11	17.2362
5016	Huntington's disease	PREDICTED: Sus scrofa similar to ATP synthase subunit beta, mitochondrial (LOC100157156), mRNA	LOC100157156	CR600201.1	506	ATP5B	ATP synthase, H+ transporting, mitochondrial F1 complex, beta polypeptide	8.92933e-12	2.12689e-11	17.2362
5016	Huntington's disease	PREDICTED: Sus scrofa similar to adenine nucleotide translocator 2 (LOC100158185), mRNA	LOC100158185	NM_001152.4	292	SLC25A5	solute carrier family 25 (mitochondrial carrier; adenine nucleotide translocator), member 5	8.92933e-12	2.12689e-11	17.2362
5016	Huntington's disease	Sus scrofa peoxisome proliferative activated receptor gamma coactivator 1 (PPARGC1) mRNA, 3' untranslated region, partial sequence	PPARGC-1	NM_013261.3	10891	PPARGC1A	peroxisome proliferator-activated receptor gamma, coactivator 1 alpha	8.92933e-12	2.12689e-11	17.2362
5016	Huntington's disease	Sus scrofa peroxisome proliferator activated receptor gamma, coactivator 1 alpha (PPARGC-1), mRNA	PPARGC-1	NM_013261.3	10891	PPARGC1A	peroxisome proliferator-activated receptor gamma, coactivator 1 alpha	8.92933e-12	2.12689e-11	17.2362
5016	Huntington's disease	Sus scrofa voltage-dependent anion channel 5, pseudogene (VDAC5P), mRNA	VDAC5P	NM_005662.5	7419	VDAC3	voltage-dependent anion channel 3	8.92933e-12	2.12689e-11	17.2362
5016	Huntington's disease	1139821 MARC 4PIG Sus scrofa cDNA 3', mRNA sequence	COX7C					8.92933e-12	2.12689e-11	17.2362
5016	Huntington's disease	EST0132-1 Swine Lambda TriplEx2 Library Sus scrofa cDNA clone 5-6 3' similar to ATP synthase,mitochondrial F1 complex,O subunit (ATP5O), mRNA sequence	LOC733678					8.92933e-12	2.12689e-11	17.2362
5010	Alzheimer's disease	Sus scrofa NADH dehydrogenase 1 beta subcomplex 6 (LOC733605), mRNA	LOC733605	AK289702.1	4712	NDUFB6	NADH dehydrogenase (ubiquinone) 1 beta subcomplex, 6, 17kDa	5.39278e-11	1.17747e-10	14.8955
5010	Alzheimer's disease	Sus scrofa ATP synthase H+-transporting mitochondrial F1 complex O subunit (LOC733678), nuclear gene encoding mitochondrial protein, mRNA	LOC733678	NM_001697.2	539	ATP5O	ATP synthase, H+ transporting, mitochondrial F1 complex, O subunit	5.39278e-11	1.17747e-10	14.8955
5010	Alzheimer's disease	Sus scrofa cytochrome c oxidase subunit VIIc (COX7C), nuclear gene encoding mitochondrial protein, mRNA	COX7C	NM_001867.2	1350	COX7C	cytochrome c oxidase subunit VIIc	5.39278e-11	1.17747e-10	14.8955
5010	Alzheimer's disease	Sus scrofa succinate dehydrogenase complex, subunit D, integral membrane protein (SDHD), nuclear gene encoding mitochondrial protein, mRNA	SDHD	BC012603.1	6392	SDHD	succinate dehydrogenase complex, subunit D, integral membrane protein	5.39278e-11	1.17747e-10	14.8955
5010	Alzheimer's disease	Pig mRNA for endoplasmic-reticulum Ca(2+)-transport ATPase (class 1)	SERCA2	NM_001681.3	488	ATP2A2	ATPase, Ca++ transporting, cardiac muscle, slow twitch 2	5.39278e-11	1.17747e-10	14.8955
5010	Alzheimer's disease	Pig mRNA for endoplasmic-reticulum Ca(2+)-transport ATPase (class 3 non-muscle transcript)	SERCA2	NM_001135765.1	488	ATP2A2	ATPase, Ca++ transporting, cardiac muscle, slow twitch 2	5.39278e-11	1.17747e-10	14.8955
5010	Alzheimer's disease	PREDICTED: Sus scrofa similar to ATP synthase, H+ transporting, mitochondrial F1 complex, alpha subunit 1, cardiac muscle (LOC100157880), mRNA	ATP5A1	AK289457.1	498	ATP5A1	ATP synthase, H+ transporting, mitochondrial F1 complex, alpha subunit 1, cardiac muscle	5.39278e-11	1.17747e-10	14.8955
5010	Alzheimer's disease	PREDICTED: Sus scrofa similar to NADH dehydrogenase [ubiquinone] 1 beta subcomplex subunit 9 (NADH-ubiquinone oxidoreductase B22 subunit) (Complex I-B22) (CI-B22) (LOC100154130), mRNA	LOC100154130	AK313432.1	4715	NDUFB9	NADH dehydrogenase (ubiquinone) 1 beta subcomplex, 9, 22kDa	5.39278e-11	1.17747e-10	14.8955
5010	Alzheimer's disease	PREDICTED: Sus scrofa similar to NADH dehydrogenase (ubiquinone) Fe-S protein 2, 49kDa (NADH-coenzyme Q reductase) (LOC100156075), mRNA	LOC100156075	NM_004550.4	4720	NDUFS2	NADH dehydrogenase (ubiquinone) Fe-S protein 2, 49kDa (NADH-coenzyme Q reductase)	5.39278e-11	1.17747e-10	14.8955
5010	Alzheimer's disease	PREDICTED: Sus scrofa similar to ATP synthase subunit beta, mitochondrial (LOC100157156), mRNA	LOC100157156	CR600201.1	506	ATP5B	ATP synthase, H+ transporting, mitochondrial F1 complex, beta polypeptide	5.39278e-11	1.17747e-10	14.8955
5010	Alzheimer's disease	PREDICTED: Sus scrofa similar to calmodulin (LOC100154056), mRNA	LOC100154056	NM_006888.4	801	CALM1	calmodulin 1 (phosphorylase kinase, delta)	5.39278e-11	1.17747e-10	14.8955
5010	Alzheimer's disease	PREDICTED: Sus scrofa similar to protein phosphatase 3, catalytic subunit, gamma (LOC100158082), mRNA	LOC100158082	AK299415.1	5533	PPP3CC	protein phosphatase 3 (formerly 2B), catalytic subunit, gamma isoform	5.39278e-11	1.17747e-10	14.8955
5010	Alzheimer's disease	PREDICTED: Sus scrofa similar to insulin-degrading enzyme (LOC100155309), mRNA	LOC100155309	NM_004969.3	3416	IDE	insulin-degrading enzyme	5.39278e-11	1.17747e-10	14.8955
5010	Alzheimer's disease	1139821 MARC 4PIG Sus scrofa cDNA 3', mRNA sequence	COX7C					5.39278e-11	1.17747e-10	14.8955
5010	Alzheimer's disease	EST0132-1 Swine Lambda TriplEx2 Library Sus scrofa cDNA clone 5-6 3' similar to ATP synthase,mitochondrial F1 complex,O subunit (ATP5O), mRNA sequence	LOC733678					5.39278e-11	1.17747e-10	14.8955
71	Fatty acid metabolism	Sus scrofa peroxisomal D3,D2-enoyl-CoA isomerase (PECI), mRNA	PECI	NR_028588.1	10455	PECI	peroxisomal D3,D2-enoyl-CoA isomerase	7.98035e-10	1.55129e-09	37.0428
71	Fatty acid metabolism	Sus scrofa acyl-Coenzyme A dehydrogenase, C-2 to C-3 short chain (ACADS), nuclear gene encoding mitochondrial protein, mRNA	ACADS	NM_000017.2	35	ACADS	acyl-Coenzyme A dehydrogenase, C-2 to C-3 short chain	7.98035e-10	1.55129e-09	37.0428
71	Fatty acid metabolism	Sus scrofa acyl-Coenzyme A dehydrogenase, long chain (ACADL), nuclear gene encoding mitochondrial protein, mRNA	ACADL	NM_001608.3	33	ACADL	acyl-Coenzyme A dehydrogenase, long chain	7.98035e-10	1.55129e-09	37.0428
71	Fatty acid metabolism	Sus scrofa hydroxyacyl-Coenzyme A dehydrogenase/3-ketoacyl-Coenzyme A thiolase/enoyl-Coenzyme A hydratase (trifunctional protein), alpha subunit (HADHA), nuclear gene encoding mitochondrial protein, mRNA	HADHA	NM_000182.4	3030	HADHA	hydroxyacyl-Coenzyme A dehydrogenase/3-ketoacyl-Coenzyme A thiolase/enoyl-Coenzyme A hydratase (trifunctional protein), alpha subunit	7.98035e-10	1.55129e-09	37.0428
71	Fatty acid metabolism	Sus scrofa acyl-Coenzyme A dehydrogenase, C-4 to C-12 straight chain (ACADM), nuclear gene encoding mitochondrial protein, mRNA	ACADM	NM_000016.4	34	ACADM	acyl-Coenzyme A dehydrogenase, C-4 to C-12 straight chain	7.98035e-10	1.55129e-09	37.0428
71	Fatty acid metabolism	Sus scrofa L-3-hydroxyacyl-CoA dehydrogenase (HAD), mRNA	HAD	NM_005327.2	3033	HADH	hydroxyacyl-Coenzyme A dehydrogenase	7.98035e-10	1.55129e-09	37.0428
71	Fatty acid metabolism	Sus scrofa carnitine palmitoyltransferase 1B (muscle) (CPT1B), nuclear gene encoding mitochondrial protein, mRNA	CPT1B	NM_152245.2	1375	CPT1B	carnitine palmitoyltransferase 1B (muscle)	7.98035e-10	1.55129e-09	37.0428
5012	Parkinson's disease	Sus scrofa NADH dehydrogenase 1 beta subcomplex 6 (LOC733605), mRNA	LOC733605	AK289702.1	4712	NDUFB6	NADH dehydrogenase (ubiquinone) 1 beta subcomplex, 6, 17kDa	1.06034e-09	1.98444e-09	16.2169
5012	Parkinson's disease	Sus scrofa ATP synthase H+-transporting mitochondrial F1 complex O subunit (LOC733678), nuclear gene encoding mitochondrial protein, mRNA	LOC733678	NM_001697.2	539	ATP5O	ATP synthase, H+ transporting, mitochondrial F1 complex, O subunit	1.06034e-09	1.98444e-09	16.2169
5012	Parkinson's disease	Sus scrofa cytochrome c oxidase subunit VIIc (COX7C), nuclear gene encoding mitochondrial protein, mRNA	COX7C	NM_001867.2	1350	COX7C	cytochrome c oxidase subunit VIIc	1.06034e-09	1.98444e-09	16.2169
5012	Parkinson's disease	Sus scrofa succinate dehydrogenase complex, subunit D, integral membrane protein (SDHD), nuclear gene encoding mitochondrial protein, mRNA	SDHD	BC012603.1	6392	SDHD	succinate dehydrogenase complex, subunit D, integral membrane protein	1.06034e-09	1.98444e-09	16.2169
5012	Parkinson's disease	PREDICTED: Sus scrofa similar to ATP synthase, H+ transporting, mitochondrial F1 complex, alpha subunit 1, cardiac muscle (LOC100157880), mRNA	ATP5A1	AK289457.1	498	ATP5A1	ATP synthase, H+ transporting, mitochondrial F1 complex, alpha subunit 1, cardiac muscle	1.06034e-09	1.98444e-09	16.2169
5012	Parkinson's disease	PREDICTED: Sus scrofa similar to NADH dehydrogenase [ubiquinone] 1 beta subcomplex subunit 9 (NADH-ubiquinone oxidoreductase B22 subunit) (Complex I-B22) (CI-B22) (LOC100154130), mRNA	LOC100154130	AK313432.1	4715	NDUFB9	NADH dehydrogenase (ubiquinone) 1 beta subcomplex, 9, 22kDa	1.06034e-09	1.98444e-09	16.2169
5012	Parkinson's disease	PREDICTED: Sus scrofa similar to NADH dehydrogenase (ubiquinone) Fe-S protein 2, 49kDa (NADH-coenzyme Q reductase) (LOC100156075), mRNA	LOC100156075	NM_004550.4	4720	NDUFS2	NADH dehydrogenase (ubiquinone) Fe-S protein 2, 49kDa (NADH-coenzyme Q reductase)	1.06034e-09	1.98444e-09	16.2169
5012	Parkinson's disease	PREDICTED: Sus scrofa similar to ATP synthase subunit beta, mitochondrial (LOC100157156), mRNA	LOC100157156	CR600201.1	506	ATP5B	ATP synthase, H+ transporting, mitochondrial F1 complex, beta polypeptide	1.06034e-09	1.98444e-09	16.2169
5012	Parkinson's disease	PREDICTED: Sus scrofa similar to adenine nucleotide translocator 2 (LOC100158185), mRNA	LOC100158185	NM_001152.4	292	SLC25A5	solute carrier family 25 (mitochondrial carrier; adenine nucleotide translocator), member 5	1.06034e-09	1.98444e-09	16.2169
5012	Parkinson's disease	Sus scrofa voltage-dependent anion channel 5, pseudogene (VDAC5P), mRNA	VDAC5P	NM_005662.5	7419	VDAC3	voltage-dependent anion channel 3	1.06034e-09	1.98444e-09	16.2169
5012	Parkinson's disease	1139821 MARC 4PIG Sus scrofa cDNA 3', mRNA sequence	COX7C					1.06034e-09	1.98444e-09	16.2169
5012	Parkinson's disease	EST0132-1 Swine Lambda TriplEx2 Library Sus scrofa cDNA clone 5-6 3' similar to ATP synthase,mitochondrial F1 complex,O subunit (ATP5O), mRNA sequence	LOC733678					1.06034e-09	1.98444e-09	16.2169
190	Oxidative phosphorylation	Sus scrofa NADH dehydrogenase 1 beta subcomplex 6 (LOC733605), mRNA	LOC733605	AK289702.1	4712	NDUFB6	NADH dehydrogenase (ubiquinone) 1 beta subcomplex, 6, 17kDa	9.64117e-09	1.63817e-08	15.8755
190	Oxidative phosphorylation	Sus scrofa ATP synthase H+-transporting mitochondrial F1 complex O subunit (LOC733678), nuclear gene encoding mitochondrial protein, mRNA	LOC733678	NM_001697.2	539	ATP5O	ATP synthase, H+ transporting, mitochondrial F1 complex, O subunit	9.64117e-09	1.63817e-08	15.8755
190	Oxidative phosphorylation	Sus scrofa cytochrome c oxidase subunit VIIc (COX7C), nuclear gene encoding mitochondrial protein, mRNA	COX7C	NM_001867.2	1350	COX7C	cytochrome c oxidase subunit VIIc	9.64117e-09	1.63817e-08	15.8755
190	Oxidative phosphorylation	Sus scrofa succinate dehydrogenase complex, subunit D, integral membrane protein (SDHD), nuclear gene encoding mitochondrial protein, mRNA	SDHD	BC012603.1	6392	SDHD	succinate dehydrogenase complex, subunit D, integral membrane protein	9.64117e-09	1.63817e-08	15.8755
190	Oxidative phosphorylation	PREDICTED: Sus scrofa similar to ATP synthase, H+ transporting, mitochondrial F1 complex, alpha subunit 1, cardiac muscle (LOC100157880), mRNA	ATP5A1	AK289457.1	498	ATP5A1	ATP synthase, H+ transporting, mitochondrial F1 complex, alpha subunit 1, cardiac muscle	9.64117e-09	1.63817e-08	15.8755
190	Oxidative phosphorylation	PREDICTED: Sus scrofa similar to NADH dehydrogenase [ubiquinone] 1 beta subcomplex subunit 9 (NADH-ubiquinone oxidoreductase B22 subunit) (Complex I-B22) (CI-B22) (LOC100154130), mRNA	LOC100154130	AK313432.1	4715	NDUFB9	NADH dehydrogenase (ubiquinone) 1 beta subcomplex, 9, 22kDa	9.64117e-09	1.63817e-08	15.8755
190	Oxidative phosphorylation	PREDICTED: Sus scrofa similar to NADH dehydrogenase (ubiquinone) Fe-S protein 2, 49kDa (NADH-coenzyme Q reductase) (LOC100156075), mRNA	LOC100156075	NM_004550.4	4720	NDUFS2	NADH dehydrogenase (ubiquinone) Fe-S protein 2, 49kDa (NADH-coenzyme Q reductase)	9.64117e-09	1.63817e-08	15.8755
190	Oxidative phosphorylation	PREDICTED: Sus scrofa similar to ATP synthase subunit beta, mitochondrial (LOC100157156), mRNA	LOC100157156	CR600201.1	506	ATP5B	ATP synthase, H+ transporting, mitochondrial F1 complex, beta polypeptide	9.64117e-09	1.63817e-08	15.8755
190	Oxidative phosphorylation	PREDICTED: Sus scrofa similar to pyrophosphatase 1 (LOC100155201), mRNA	LOC100155201	BC061581.1	5464	PPA1	pyrophosphatase (inorganic) 1	9.64117e-09	1.63817e-08	15.8755
190	Oxidative phosphorylation	1139821 MARC 4PIG Sus scrofa cDNA 3', mRNA sequence	COX7C					9.64117e-09	1.63817e-08	15.8755
190	Oxidative phosphorylation	EST0132-1 Swine Lambda TriplEx2 Library Sus scrofa cDNA clone 5-6 3' similar to ATP synthase,mitochondrial F1 complex,O subunit (ATP5O), mRNA sequence	LOC733678					9.64117e-09	1.63817e-08	15.8755
330	Arginine and proline metabolism	Sus scrofa creatine kinase, mitochondrial 2 (sarcomeric) (CKMT2), nuclear gene encoding mitochondrial protein, mRNA	CKMT2	NM_001099736.1	1160	CKMT2	creatine kinase, mitochondrial 2 (sarcomeric)	1.31444e-08	2.15249e-08	26.0671
330	Arginine and proline metabolism	Sus scrofa mRNA, clone:AMP010005E06, expressed in alveolar macrophage	LOC100155893	AK312484.1	384	ARG2	arginase, type II	1.31444e-08	2.15249e-08	26.0671
330	Arginine and proline metabolism	Sus scrofa creatine kinase, muscle (CKM), mRNA	CKM	AK129878.1	1158	CKM	creatine kinase, muscle	1.31444e-08	2.15249e-08	26.0671
330	Arginine and proline metabolism	PREDICTED: Sus scrofa similar to arginase, type II (LOC100155893), mRNA	LOC100155893	NM_001172.3	384	ARG2	arginase, type II	1.31444e-08	2.15249e-08	26.0671
330	Arginine and proline metabolism	Sus scrofa glutamine synthetase mRNA, partial cds	GLUL	NM_001033056.2	2752	GLUL	glutamate-ammonia ligase (glutamine synthetase)	1.31444e-08	2.15249e-08	26.0671
330	Arginine and proline metabolism	Sus scrofa glutamic-oxaloacetic transaminase 2, mitochondrial (aspartate aminotransferase 2) (GOT2), nuclear gene encoding mitochondrial protein, mRNA	GOT2	NM_002080.2	2806	GOT2	glutamic-oxaloacetic transaminase 2, mitochondrial (aspartate aminotransferase 2)	1.31444e-08	2.15249e-08	26.0671
330	Arginine and proline metabolism	Sus scrofa cytosolic aspartate aminotransferase (CASPAT), mRNA	CASPAT	NM_002079.2	2805	GOT1	glutamic-oxaloacetic transaminase 1, soluble (aspartate aminotransferase 1)	1.31444e-08	2.15249e-08	26.0671
330	Arginine and proline metabolism	Sus scrofa aminoacylase 1 (ACY1), mRNA	ACY1	BC000545.2	95	ACY1	aminoacylase 1	1.31444e-08	2.15249e-08	26.0671
4910	Insulin signaling pathway	Sus scrofa solute carrier family 2 (facilitated glucose transporter), member 4 (SLC2A4), mRNA	SLC2A4	NM_001042.2	6517	SLC2A4	solute carrier family 2 (facilitated glucose transporter), member 4	6.33395e-08	9.76215e-08	16.0871
4910	Insulin signaling pathway	PREDICTED: Sus scrofa similar to calmodulin (LOC100154056), mRNA	LOC100154056	NM_006888.4	801	CALM1	calmodulin 1 (phosphorylase kinase, delta)	6.33395e-08	9.76215e-08	16.0871
4910	Insulin signaling pathway	PREDICTED: Sus scrofa phosphoenolpyruvate carboxykinase 2 (PCK2), mRNA	PCK2	AK129934.1	5106	PCK2	phosphoenolpyruvate carboxykinase 2 (mitochondrial)	6.33395e-08	9.76215e-08	16.0871
4910	Insulin signaling pathway	PREDICTED: Sus scrofa protein phosphatase 1, regulatory (inhibitor) subunit 3C (PPP1R3C), mRNA	PPP1R3C	BC012625.1	5507	PPP1R3C	protein phosphatase 1, regulatory (inhibitor) subunit 3C	6.33395e-08	9.76215e-08	16.0871
4910	Insulin signaling pathway	PREDICTED: Sus scrofa similar to Acetyl-CoA carboxylase 2 (ACC-beta) (LOC100154993), mRNA	LOC100154993	AJ575592.3	32	ACACB	acetyl-Coenzyme A carboxylase beta	6.33395e-08	9.76215e-08	16.0871
4910	Insulin signaling pathway	Sus scrofa peoxisome proliferative activated receptor gamma coactivator 1 (PPARGC1) mRNA, 3' untranslated region, partial sequence	PPARGC-1	NM_013261.3	10891	PPARGC1A	peroxisome proliferator-activated receptor gamma, coactivator 1 alpha	6.33395e-08	9.76215e-08	16.0871
4910	Insulin signaling pathway	Sus scrofa peroxisome proliferator activated receptor gamma, coactivator 1 alpha (PPARGC-1), mRNA	PPARGC-1	NM_013261.3	10891	PPARGC1A	peroxisome proliferator-activated receptor gamma, coactivator 1 alpha	6.33395e-08	9.76215e-08	16.0871
4910	Insulin signaling pathway	Sus scrofa protein phosphatase 1, catalytic subunit, beta isoform (PPP1CB), mRNA	PPP1CB	BX647970.1	5500	PPP1CB	protein phosphatase 1, catalytic subunit, beta isoform	6.33395e-08	9.76215e-08	16.0871
4910	Insulin signaling pathway	AJ952110 KN404_1 Sus scrofa cDNA clone C0007745h04 3', mRNA sequence	LOC733612					6.33395e-08	9.76215e-08	16.0871
4720	Long-term potentiation	Sus scrofa activating transcription factor 4 (tax-responsive enhancer element B67) (ATF4), mRNA	ATF4	BC073990.1	468	ATF4	activating transcription factor 4 (tax-responsive enhancer element B67)	2.098e-07	3.04799e-07	25.1362
4720	Long-term potentiation	PREDICTED: Sus scrofa similar to RAP1A, member of RAS oncogene family (LOC100153199), mRNA	LOC100153199	BC014086.2	5906	RAP1A	RAP1A, member of RAS oncogene family	2.098e-07	3.04799e-07	25.1362
4720	Long-term potentiation	PREDICTED: Sus scrofa similar to calmodulin (LOC100154056), mRNA	LOC100154056	NM_006888.4	801	CALM1	calmodulin 1 (phosphorylase kinase, delta)	2.098e-07	3.04799e-07	25.1362
4720	Long-term potentiation	PREDICTED: Sus scrofa similar to protein phosphatase 3, catalytic subunit, gamma (LOC100158082), mRNA	LOC100158082	AK299415.1	5533	PPP3CC	protein phosphatase 3 (formerly 2B), catalytic subunit, gamma isoform	2.098e-07	3.04799e-07	25.1362
4720	Long-term potentiation	Sus scrofa protein phosphatase 1, catalytic subunit, beta isoform (PPP1CB), mRNA	PPP1CB	BX647970.1	5500	PPP1CB	protein phosphatase 1, catalytic subunit, beta isoform	2.098e-07	3.04799e-07	25.1362
4720	Long-term potentiation	AJ952110 KN404_1 Sus scrofa cDNA clone C0007745h04 3', mRNA sequence	LOC733612					2.098e-07	3.04799e-07	25.1362
250	Alanine, aspartate and glutamate metabolism	Sus scrofa adenylosuccinate synthase like 1 (ADSSL1), mRNA	ADSSL1	BC047904.1	122622	ADSSL1	adenylosuccinate synthase like 1	3.46409e-07	4.777e-07	35.9088
250	Alanine, aspartate and glutamate metabolism	Sus scrofa D-aspartate oxidase (DDO), mRNA	DDO	CR590300.1	8528	DDO	D-aspartate oxidase	3.46409e-07	4.777e-07	35.9088
250	Alanine, aspartate and glutamate metabolism	Sus scrofa glutamine synthetase mRNA, partial cds	GLUL	NM_001033056.2	2752	GLUL	glutamate-ammonia ligase (glutamine synthetase)	3.46409e-07	4.777e-07	35.9088
250	Alanine, aspartate and glutamate metabolism	Sus scrofa glutamic-oxaloacetic transaminase 2, mitochondrial (aspartate aminotransferase 2) (GOT2), nuclear gene encoding mitochondrial protein, mRNA	GOT2	NM_002080.2	2806	GOT2	glutamic-oxaloacetic transaminase 2, mitochondrial (aspartate aminotransferase 2)	3.46409e-07	4.777e-07	35.9088
250	Alanine, aspartate and glutamate metabolism	Sus scrofa cytosolic aspartate aminotransferase (CASPAT), mRNA	CASPAT	NM_002079.2	2805	GOT1	glutamic-oxaloacetic transaminase 1, soluble (aspartate aminotransferase 1)	3.46409e-07	4.777e-07	35.9088
640	Propanoate metabolism	Sus scrofa lactate dehydrogenase B (LDHB), mRNA	LDHB	NM_002300.5	3945	LDHB	lactate dehydrogenase B	1.04495e-06	1.36894e-06	29.572
640	Propanoate metabolism	PREDICTED: Sus scrofa similar to Acetyl-CoA carboxylase 2 (ACC-beta) (LOC100154993), mRNA	LOC100154993	AJ575592.3	32	ACACB	acetyl-Coenzyme A carboxylase beta	1.04495e-06	1.36894e-06	29.572
640	Propanoate metabolism	Sus scrofa hydroxyacyl-Coenzyme A dehydrogenase/3-ketoacyl-Coenzyme A thiolase/enoyl-Coenzyme A hydratase (trifunctional protein), alpha subunit (HADHA), nuclear gene encoding mitochondrial protein, mRNA	HADHA	NM_000182.4	3030	HADHA	hydroxyacyl-Coenzyme A dehydrogenase/3-ketoacyl-Coenzyme A thiolase/enoyl-Coenzyme A hydratase (trifunctional protein), alpha subunit	1.04495e-06	1.36894e-06	29.572
640	Propanoate metabolism	Sus scrofa acyl-Coenzyme A dehydrogenase, C-4 to C-12 straight chain (ACADM), nuclear gene encoding mitochondrial protein, mRNA	ACADM	NM_000016.4	34	ACADM	acyl-Coenzyme A dehydrogenase, C-4 to C-12 straight chain	1.04495e-06	1.36894e-06	29.572
640	Propanoate metabolism	Sus scrofa succinate-CoA ligase, alpha subunit (SUCLG1), mRNA	SUCLG1	NM_003849.2	8802	SUCLG1	succinate-CoA ligase, alpha subunit	1.04495e-06	1.36894e-06	29.572
620	Pyruvate metabolism	Sus scrofa lactate dehydrogenase B (LDHB), mRNA	LDHB	NM_002300.5	3945	LDHB	lactate dehydrogenase B	2.55512e-06	3.18684e-06	25.1362
620	Pyruvate metabolism	PREDICTED: Sus scrofa similar to pyruvate kinase 3, transcript variant 2 (LOC100158154), mRNA	PKM2	BC007640.1	5315	PKM2	pyruvate kinase, muscle	2.55512e-06	3.18684e-06	25.1362
620	Pyruvate metabolism	PREDICTED: Sus scrofa similar to pyruvate kinase 3, transcript variant 3 (LOC100158154), mRNA	PKM2	AK309781.1	5315	PKM2	pyruvate kinase, muscle	2.55512e-06	3.18684e-06	25.1362
620	Pyruvate metabolism	PREDICTED: Sus scrofa phosphoenolpyruvate carboxykinase 2 (PCK2), mRNA	PCK2	AK129934.1	5106	PCK2	phosphoenolpyruvate carboxykinase 2 (mitochondrial)	2.55512e-06	3.18684e-06	25.1362
620	Pyruvate metabolism	PREDICTED: Sus scrofa similar to Acetyl-CoA carboxylase 2 (ACC-beta) (LOC100154993), mRNA	LOC100154993	AJ575592.3	32	ACACB	acetyl-Coenzyme A carboxylase beta	2.55512e-06	3.18684e-06	25.1362
620	Pyruvate metabolism	Sus scrofa dihydrolipoamide dehydrogenase (DLD), mRNA	DLD	NM_000108.3	1738	DLD	dihydrolipoamide dehydrogenase	2.55512e-06	3.18684e-06	25.1362
280	Valine, leucine and isoleucine degradation	Sus scrofa acyl-Coenzyme A dehydrogenase, C-2 to C-3 short chain (ACADS), nuclear gene encoding mitochondrial protein, mRNA	ACADS	NM_000017.2	35	ACADS	acyl-Coenzyme A dehydrogenase, C-2 to C-3 short chain	4.2701e-06	5.05079e-06	22.8511
280	Valine, leucine and isoleucine degradation	Sus scrofa hydroxyacyl-Coenzyme A dehydrogenase/3-ketoacyl-Coenzyme A thiolase/enoyl-Coenzyme A hydratase (trifunctional protein), alpha subunit (HADHA), nuclear gene encoding mitochondrial protein, mRNA	HADHA	NM_000182.4	3030	HADHA	hydroxyacyl-Coenzyme A dehydrogenase/3-ketoacyl-Coenzyme A thiolase/enoyl-Coenzyme A hydratase (trifunctional protein), alpha subunit	4.2701e-06	5.05079e-06	22.8511
280	Valine, leucine and isoleucine degradation	Sus scrofa acyl-Coenzyme A dehydrogenase, C-4 to C-12 straight chain (ACADM), nuclear gene encoding mitochondrial protein, mRNA	ACADM	NM_000016.4	34	ACADM	acyl-Coenzyme A dehydrogenase, C-4 to C-12 straight chain	4.2701e-06	5.05079e-06	22.8511
280	Valine, leucine and isoleucine degradation	Sus scrofa dihydrolipoamide dehydrogenase (DLD), mRNA	DLD	NM_000108.3	1738	DLD	dihydrolipoamide dehydrogenase	4.2701e-06	5.05079e-06	22.8511
280	Valine, leucine and isoleucine degradation	Sus scrofa L-3-hydroxyacyl-CoA dehydrogenase (HAD), mRNA	HAD	NM_005327.2	3033	HADH	hydroxyacyl-Coenzyme A dehydrogenase	4.2701e-06	5.05079e-06	22.8511
710	Carbon fixation in photosynthetic organisms	Sus scrofa phosphoglycerate kinase 1 (PGK1), mRNA	PGK1	NM_000291.3	5230	PGK1	phosphoglycerate kinase 1	5.95246e-06	6.70125e-06	36.5617
710	Carbon fixation in photosynthetic organisms	PREDICTED: Sus scrofa similar to pyruvate kinase 3, transcript variant 2 (LOC100158154), mRNA	PKM2	BC007640.1	5315	PKM2	pyruvate kinase, muscle	5.95246e-06	6.70125e-06	36.5617
710	Carbon fixation in photosynthetic organisms	PREDICTED: Sus scrofa similar to pyruvate kinase 3, transcript variant 3 (LOC100158154), mRNA	PKM2	AK309781.1	5315	PKM2	pyruvate kinase, muscle	5.95246e-06	6.70125e-06	36.5617
710	Carbon fixation in photosynthetic organisms	Sus scrofa glutamic-oxaloacetic transaminase 2, mitochondrial (aspartate aminotransferase 2) (GOT2), nuclear gene encoding mitochondrial protein, mRNA	GOT2	NM_002080.2	2806	GOT2	glutamic-oxaloacetic transaminase 2, mitochondrial (aspartate aminotransferase 2)	5.95246e-06	6.70125e-06	36.5617
710	Carbon fixation in photosynthetic organisms	Sus scrofa cytosolic aspartate aminotransferase (CASPAT), mRNA	CASPAT	NM_002079.2	2805	GOT1	glutamic-oxaloacetic transaminase 1, soluble (aspartate aminotransferase 1)	5.95246e-06	6.70125e-06	36.5617
4530	Tight junction	PREDICTED: Sus scrofa similar to Actinin, alpha 2 (LOC100157406), mRNA	LOC100157406	NM_001103.2	88	ACTN2	actinin, alpha 2	7.04175e-06	7.68757e-06	14.3635
4530	Tight junction	Sus scrofa myosin light chain 2V (MLC2V), mRNA	MLC2V	NM_000432.3	4633	MYL2	myosin, light chain 2, regulatory, cardiac, slow	7.04175e-06	7.68757e-06	14.3635
4530	Tight junction	Sus scrofa protein phosphatase 2 (formerly 2A), catalytic subunit, alpha isoform (PPP2CA), mRNA	PPP2CA	NM_002715.2	5515	PPP2CA	protein phosphatase 2 (formerly 2A), catalytic subunit, alpha isoform	7.04175e-06	7.68757e-06	14.3635
4530	Tight junction	Sus scrofa fast skeletal myosin light chain 2 (MYLPF), mRNA	MYLPF	NM_013292.3	29895	MYLPF	myosin light chain, phosphorylatable, fast skeletal muscle	7.04175e-06	7.68757e-06	14.3635
4530	Tight junction	Sus scrofa myosin, heavy chain 7, cardiac muscle, beta (MYH7), mRNA	MYH7	NM_000257.2	4625	MYH7	myosin, heavy chain 7, cardiac muscle, beta	7.04175e-06	7.68757e-06	14.3635
4530	Tight junction	Sus scrofa myosin, heavy chain 2, skeletal muscle, adult (MYH2), mRNA	MYH2	NM_017534.5	4620	MYH2	myosin, heavy chain 2, skeletal muscle, adult	7.04175e-06	7.68757e-06	14.3635
3320	PPAR signaling pathway	Sus scrofa partial mRNA for heart fatty acid-binding protein (FABP3 gene)	FABP3	AK314122.1	2170	FABP3	fatty acid binding protein 3, muscle and heart (mammary-derived growth inhibitor)	1.38286e-05	1.42332e-05	12.8355
3320	PPAR signaling pathway	Sus scrofa fatty acid binding protein 3, muscle and heart (mammary-derived growth inhibitor) (FABP3), mRNA	FABP3	NM_004102.3	2170	FABP3	fatty acid binding protein 3, muscle and heart (mammary-derived growth inhibitor)	1.38286e-05	1.42332e-05	12.8355
3320	PPAR signaling pathway	PREDICTED: Sus scrofa phosphoenolpyruvate carboxykinase 2 (PCK2), mRNA	PCK2	AK129934.1	5106	PCK2	phosphoenolpyruvate carboxykinase 2 (mitochondrial)	1.38286e-05	1.42332e-05	12.8355
3320	PPAR signaling pathway	Sus scrofa acyl-Coenzyme A dehydrogenase, long chain (ACADL), nuclear gene encoding mitochondrial protein, mRNA	ACADL	NM_001608.3	33	ACADL	acyl-Coenzyme A dehydrogenase, long chain	1.38286e-05	1.42332e-05	12.8355
3320	PPAR signaling pathway	Sus scrofa acyl-Coenzyme A dehydrogenase, C-4 to C-12 straight chain (ACADM), nuclear gene encoding mitochondrial protein, mRNA	ACADM	NM_000016.4	34	ACADM	acyl-Coenzyme A dehydrogenase, C-4 to C-12 straight chain	1.38286e-05	1.42332e-05	12.8355
3320	PPAR signaling pathway	Sus scrofa carnitine palmitoyltransferase 1B (muscle) (CPT1B), nuclear gene encoding mitochondrial protein, mRNA	CPT1B	NM_152245.2	1375	CPT1B	carnitine palmitoyltransferase 1B (muscle)	1.38286e-05	1.42332e-05	12.8355
3320	PPAR signaling pathway	Sus scrofa angiopoietin-like 4 (ANGPTL4), mRNA	ANGPTL4	AK303269.1	51129	ANGPTL4	angiopoietin-like 4	1.38286e-05	1.42332e-05	12.8355
4020	Calcium signaling pathway	Pig mRNA for endoplasmic-reticulum Ca(2+)-transport ATPase (class 1)	SERCA2	NM_001681.3	488	ATP2A2	ATPase, Ca++ transporting, cardiac muscle, slow twitch 2	1.63631e-05	1.64897e-05	9.64127
4020	Calcium signaling pathway	Pig mRNA for endoplasmic-reticulum Ca(2+)-transport ATPase (class 3 non-muscle transcript)	SERCA2	NM_001135765.1	488	ATP2A2	ATPase, Ca++ transporting, cardiac muscle, slow twitch 2	1.63631e-05	1.64897e-05	9.64127
4020	Calcium signaling pathway	PREDICTED: Sus scrofa similar to calmodulin (LOC100154056), mRNA	LOC100154056	NM_006888.4	801	CALM1	calmodulin 1 (phosphorylase kinase, delta)	1.63631e-05	1.64897e-05	9.64127
4020	Calcium signaling pathway	PREDICTED: Sus scrofa similar to protein phosphatase 3, catalytic subunit, gamma (LOC100158082), mRNA	LOC100158082	AK299415.1	5533	PPP3CC	protein phosphatase 3 (formerly 2B), catalytic subunit, gamma isoform	1.63631e-05	1.64897e-05	9.64127
4020	Calcium signaling pathway	PREDICTED: Sus scrofa similar to adenine nucleotide translocator 2 (LOC100158185), mRNA	LOC100158185	NM_001152.4	292	SLC25A5	solute carrier family 25 (mitochondrial carrier; adenine nucleotide translocator), member 5	1.63631e-05	1.64897e-05	9.64127
4020	Calcium signaling pathway	Sus scrofa phospholamban (PLN), mRNA	PLN	NM_002667.3	5350	PLN	phospholamban	1.63631e-05	1.64897e-05	9.64127
4020	Calcium signaling pathway	Sus scrofa voltage-dependent anion channel 5, pseudogene (VDAC5P), mRNA	VDAC5P	NM_005662.5	7419	VDAC3	voltage-dependent anion channel 3	1.63631e-05	1.64897e-05	9.64127
4020	Calcium signaling pathway	Sus scrofa ryanodine receptor 1 (RYR1), mRNA	RYR1	NM_001042723.1	6261	RYR1	ryanodine receptor 1 (skeletal)	1.63631e-05	1.64897e-05	9.64127
270	Cysteine and methionine metabolism	Sus scrofa lactate dehydrogenase B (LDHB), mRNA	LDHB	NM_002300.5	3945	LDHB	lactate dehydrogenase B	4.0961e-05	3.9749e-05	23.6576
270	Cysteine and methionine metabolism	Sus scrofa glutamic-oxaloacetic transaminase 2, mitochondrial (aspartate aminotransferase 2) (GOT2), nuclear gene encoding mitochondrial protein, mRNA	GOT2	NM_002080.2	2806	GOT2	glutamic-oxaloacetic transaminase 2, mitochondrial (aspartate aminotransferase 2)	4.0961e-05	3.9749e-05	23.6576
270	Cysteine and methionine metabolism	Sus scrofa cytosolic aspartate aminotransferase (CASPAT), mRNA	CASPAT	NM_002079.2	2805	GOT1	glutamic-oxaloacetic transaminase 1, soluble (aspartate aminotransferase 1)	4.0961e-05	3.9749e-05	23.6576
270	Cysteine and methionine metabolism	Sus scrofa S-adenosylhomocysteine hydrolase (AHCY), mRNA	AHCY	NM_000687.2	191	AHCY	adenosylhomocysteinase	4.0961e-05	3.9749e-05	23.6576
4670	Leukocyte transendothelial migration	PREDICTED: Sus scrofa similar to RAP1A, member of RAS oncogene family (LOC100153199), mRNA	LOC100153199	BC014086.2	5906	RAP1A	RAP1A, member of RAS oncogene family	0.000183041	0.000160503	10.9288
4670	Leukocyte transendothelial migration	PREDICTED: Sus scrofa similar to Actinin, alpha 2 (LOC100157406), mRNA	LOC100157406	NM_001103.2	88	ACTN2	actinin, alpha 2	0.000183041	0.000160503	10.9288
4670	Leukocyte transendothelial migration	Sus scrofa myosin light chain 2V (MLC2V), mRNA	MLC2V	NM_000432.3	4633	MYL2	myosin, light chain 2, regulatory, cardiac, slow	0.000183041	0.000160503	10.9288
4670	Leukocyte transendothelial migration	Sus scrofa fast skeletal myosin light chain 2 (MYLPF), mRNA	MYLPF	NM_013292.3	29895	MYLPF	myosin light chain, phosphorylatable, fast skeletal muscle	0.000183041	0.000160503	10.9288
4670	Leukocyte transendothelial migration	Sus scrofa mitogen-activated protein kinase 12 (MAPK12), mRNA	MAPK12					0.000183041	0.000160503	10.9288
400	Phenylalanine, tyrosine and tryptophan biosynthesis	Sus scrofa glutamic-oxaloacetic transaminase 2, mitochondrial (aspartate aminotransferase 2) (GOT2), nuclear gene encoding mitochondrial protein, mRNA	GOT2	NM_002080.2	2806	GOT2	glutamic-oxaloacetic transaminase 2, mitochondrial (aspartate aminotransferase 2)	0.000196965	0.000171097	100.545
400	Phenylalanine, tyrosine and tryptophan biosynthesis	Sus scrofa cytosolic aspartate aminotransferase (CASPAT), mRNA	CASPAT	NM_002079.2	2805	GOT1	glutamic-oxaloacetic transaminase 1, soluble (aspartate aminotransferase 1)	0.000196965	0.000171097	100.545
4810	Regulation of actin cytoskeleton	Sus scrofa CFL2b variant 1 (CFL2b) mRNA, complete cds	CFL2	NR_028132.1	1073	CFL2	cofilin 2 (muscle)	0.000205734	0.000177667	8.04357
4810	Regulation of actin cytoskeleton	PREDICTED: Sus scrofa similar to Actinin, alpha 2 (LOC100157406), mRNA	LOC100157406	NM_001103.2	88	ACTN2	actinin, alpha 2	0.000205734	0.000177667	8.04357
4810	Regulation of actin cytoskeleton	Sus scrofa myosin light chain 2V (MLC2V), mRNA	MLC2V	NM_000432.3	4633	MYL2	myosin, light chain 2, regulatory, cardiac, slow	0.000205734	0.000177667	8.04357
4810	Regulation of actin cytoskeleton	Sus scrofa fast skeletal myosin light chain 2 (MYLPF), mRNA	MYLPF	NM_013292.3	29895	MYLPF	myosin light chain, phosphorylatable, fast skeletal muscle	0.000205734	0.000177667	8.04357
4810	Regulation of actin cytoskeleton	Sus scrofa protein phosphatase 1, catalytic subunit, beta isoform (PPP1CB), mRNA	PPP1CB	BX647970.1	5500	PPP1CB	protein phosphatase 1, catalytic subunit, beta isoform	0.000205734	0.000177667	8.04357
4810	Regulation of actin cytoskeleton	AJ952110 KN404_1 Sus scrofa cDNA clone C0007745h04 3', mRNA sequence	LOC733612					0.000205734	0.000177667	8.04357
4510	Focal adhesion	PREDICTED: Sus scrofa similar to RAP1A, member of RAS oncogene family (LOC100153199), mRNA	LOC100153199	BC014086.2	5906	RAP1A	RAP1A, member of RAS oncogene family	0.000238281	0.000201394	7.83465
4510	Focal adhesion	PREDICTED: Sus scrofa similar to Actinin, alpha 2 (LOC100157406), mRNA	LOC100157406	NM_001103.2	88	ACTN2	actinin, alpha 2	0.000238281	0.000201394	7.83465
4510	Focal adhesion	Sus scrofa myosin light chain 2V (MLC2V), mRNA	MLC2V	NM_000432.3	4633	MYL2	myosin, light chain 2, regulatory, cardiac, slow	0.000238281	0.000201394	7.83465
4510	Focal adhesion	Sus scrofa fast skeletal myosin light chain 2 (MYLPF), mRNA	MYLPF	NM_013292.3	29895	MYLPF	myosin light chain, phosphorylatable, fast skeletal muscle	0.000238281	0.000201394	7.83465
4510	Focal adhesion	Sus scrofa protein phosphatase 1, catalytic subunit, beta isoform (PPP1CB), mRNA	PPP1CB	BX647970.1	5500	PPP1CB	protein phosphatase 1, catalytic subunit, beta isoform	0.000238281	0.000201394	7.83465
4510	Focal adhesion	AJ952110 KN404_1 Sus scrofa cDNA clone C0007745h04 3', mRNA sequence	LOC733612					0.000238281	0.000201394	7.83465
310	Lysine degradation	Sus scrofa hydroxyacyl-Coenzyme A dehydrogenase/3-ketoacyl-Coenzyme A thiolase/enoyl-Coenzyme A hydratase (trifunctional protein), alpha subunit (HADHA), nuclear gene encoding mitochondrial protein, mRNA	HADHA	NM_000182.4	3030	HADHA	hydroxyacyl-Coenzyme A dehydrogenase/3-ketoacyl-Coenzyme A thiolase/enoyl-Coenzyme A hydratase (trifunctional protein), alpha subunit	0.000399736	0.000314114	25.1362
310	Lysine degradation	Sus scrofa L-3-hydroxyacyl-CoA dehydrogenase (HAD), mRNA	HAD	NM_005327.2	3033	HADH	hydroxyacyl-Coenzyme A dehydrogenase	0.000399736	0.000314114	25.1362
310	Lysine degradation	Sus scrofa dihydrolipoamide S-succinyltransferase (E2 component of 2-oxo-glutarate complex) (DLST), mRNA	DLST	BC001922.1	1743	DLST	dihydrolipoamide S-succinyltransferase (E2 component of 2-oxo-glutarate complex)	0.000399736	0.000314114	25.1362
680	Methane metabolism	PREDICTED: Sus scrofa similar to Serine hydroxymethyltransferase 2 (mitochondrial) (LOC100152340), mRNA	LOC100152340	NM_005412.5	6472	SHMT2	serine hydroxymethyltransferase 2 (mitochondrial)	0.000587011	0.00042651	67.0298
930	Caprolactam degradation	Sus scrofa hydroxyacyl-Coenzyme A dehydrogenase/3-ketoacyl-Coenzyme A thiolase/enoyl-Coenzyme A hydratase (trifunctional protein), alpha subunit (HADHA), nuclear gene encoding mitochondrial protein, mRNA	HADHA	NM_000182.4	3030	HADHA	hydroxyacyl-Coenzyme A dehydrogenase/3-ketoacyl-Coenzyme A thiolase/enoyl-Coenzyme A hydratase (trifunctional protein), alpha subunit	0.000587011	0.00042651	67.0298
930	Caprolactam degradation	Sus scrofa L-3-hydroxyacyl-CoA dehydrogenase (HAD), mRNA	HAD	NM_005327.2	3033	HADH	hydroxyacyl-Coenzyme A dehydrogenase	0.000587011	0.00042651	67.0298
680	Methane metabolism	Sus scrofa catalase (CAT), mRNA	CAT	NM_001752.3	847	CAT	catalase	0.000587011	0.00042651	67.0298
4010	MAPK signaling pathway	Sus scrofa growth arrest and DNA-damage-inducible, alpha (GADD45A), mRNA	GADD45A	NM_001924.2	1647	GADD45A	growth arrest and DNA-damage-inducible, alpha	0.000633345	0.000451752	6.55726
4010	MAPK signaling pathway	Sus scrofa activating transcription factor 4 (tax-responsive enhancer element B67) (ATF4), mRNA	ATF4	BC073990.1	468	ATF4	activating transcription factor 4 (tax-responsive enhancer element B67)	0.000633345	0.000451752	6.55726
4010	MAPK signaling pathway	PREDICTED: Sus scrofa similar to RAP1A, member of RAS oncogene family (LOC100153199), mRNA	LOC100153199	BC014086.2	5906	RAP1A	RAP1A, member of RAS oncogene family	0.000633345	0.000451752	6.55726
4010	MAPK signaling pathway	PREDICTED: Sus scrofa similar to growth arrest and DNA-damage-inducible, gamma (LOC100152997), mRNA	LOC100152997	NM_006705.3	10912	GADD45G	growth arrest and DNA-damage-inducible, gamma	0.000633345	0.000451752	6.55726
4010	MAPK signaling pathway	PREDICTED: Sus scrofa similar to protein phosphatase 3, catalytic subunit, gamma (LOC100158082), mRNA	LOC100158082	AK299415.1	5533	PPP3CC	protein phosphatase 3 (formerly 2B), catalytic subunit, gamma isoform	0.000633345	0.000451752	6.55726
4010	MAPK signaling pathway	Sus scrofa mitogen-activated protein kinase 12 (MAPK12), mRNA	MAPK12					0.000633345	0.000451752	6.55726
260	Glycine, serine and threonine metabolism	Sus scrofa phosphoglycerate dehydrogenase (PHGDH), mRNA	CH242-38B5.2	BC000303.2	26227	PHGDH	phosphoglycerate dehydrogenase	0.000651723	0.00046151	21.5453
260	Glycine, serine and threonine metabolism	PREDICTED: Sus scrofa similar to Serine hydroxymethyltransferase 2 (mitochondrial) (LOC100152340), mRNA	LOC100152340	NM_005412.5	6472	SHMT2	serine hydroxymethyltransferase 2 (mitochondrial)	0.000651723	0.00046151	21.5453
650	Butanoate metabolism	Sus scrofa acyl-Coenzyme A dehydrogenase, C-2 to C-3 short chain (ACADS), nuclear gene encoding mitochondrial protein, mRNA	ACADS	NM_000017.2	35	ACADS	acyl-Coenzyme A dehydrogenase, C-2 to C-3 short chain	0.000651723	0.00046151	21.5453
650	Butanoate metabolism	Sus scrofa hydroxyacyl-Coenzyme A dehydrogenase/3-ketoacyl-Coenzyme A thiolase/enoyl-Coenzyme A hydratase (trifunctional protein), alpha subunit (HADHA), nuclear gene encoding mitochondrial protein, mRNA	HADHA	NM_000182.4	3030	HADHA	hydroxyacyl-Coenzyme A dehydrogenase/3-ketoacyl-Coenzyme A thiolase/enoyl-Coenzyme A hydratase (trifunctional protein), alpha subunit	0.000651723	0.00046151	21.5453
260	Glycine, serine and threonine metabolism	Sus scrofa dihydrolipoamide dehydrogenase (DLD), mRNA	DLD	NM_000108.3	1738	DLD	dihydrolipoamide dehydrogenase	0.000651723	0.00046151	21.5453
650	Butanoate metabolism	Sus scrofa L-3-hydroxyacyl-CoA dehydrogenase (HAD), mRNA	HAD	NM_005327.2	3033	HADH	hydroxyacyl-Coenzyme A dehydrogenase	0.000651723	0.00046151	21.5453
350	Tyrosine metabolism	Sus scrofa enoyl Coenzyme A hydratase 1, peroxisomal (ECH1), mRNA	ECH1	CR625294.1	1891	ECH1	enoyl Coenzyme A hydratase 1, peroxisomal	0.000808689	0.000543296	20.1089
350	Tyrosine metabolism	Sus scrofa glutamic-oxaloacetic transaminase 2, mitochondrial (aspartate aminotransferase 2) (GOT2), nuclear gene encoding mitochondrial protein, mRNA	GOT2	NM_002080.2	2806	GOT2	glutamic-oxaloacetic transaminase 2, mitochondrial (aspartate aminotransferase 2)	0.000808689	0.000543296	20.1089
350	Tyrosine metabolism	Sus scrofa cytosolic aspartate aminotransferase (CASPAT), mRNA	CASPAT	NM_002079.2	2805	GOT1	glutamic-oxaloacetic transaminase 1, soluble (aspartate aminotransferase 1)	0.000808689	0.000543296	20.1089
380	Tryptophan metabolism	Sus scrofa hydroxyacyl-Coenzyme A dehydrogenase/3-ketoacyl-Coenzyme A thiolase/enoyl-Coenzyme A hydratase (trifunctional protein), alpha subunit (HADHA), nuclear gene encoding mitochondrial protein, mRNA	HADHA	NM_000182.4	3030	HADHA	hydroxyacyl-Coenzyme A dehydrogenase/3-ketoacyl-Coenzyme A thiolase/enoyl-Coenzyme A hydratase (trifunctional protein), alpha subunit	0.000808689	0.000543296	20.1089
380	Tryptophan metabolism	Sus scrofa L-3-hydroxyacyl-CoA dehydrogenase (HAD), mRNA	HAD	NM_005327.2	3033	HADH	hydroxyacyl-Coenzyme A dehydrogenase	0.000808689	0.000543296	20.1089
380	Tryptophan metabolism	Sus scrofa catalase (CAT), mRNA	CAT	NM_001752.3	847	CAT	catalase	0.000808689	0.000543296	20.1089
950	Alkaloid biosynthesis I	Sus scrofa glutamic-oxaloacetic transaminase 2, mitochondrial (aspartate aminotransferase 2) (GOT2), nuclear gene encoding mitochondrial protein, mRNA	GOT2	NM_002080.2	2806	GOT2	glutamic-oxaloacetic transaminase 2, mitochondrial (aspartate aminotransferase 2)	0.00116631	0.000727587	50.2723
950	Alkaloid biosynthesis I	Sus scrofa cytosolic aspartate aminotransferase (CASPAT), mRNA	CASPAT	NM_002079.2	2805	GOT1	glutamic-oxaloacetic transaminase 1, soluble (aspartate aminotransferase 1)	0.00116631	0.000727587	50.2723
630	Glyoxylate and dicarboxylate metabolism	Sus scrofa aconitase 2, mitochondrial (ACO2), nuclear gene encoding mitochondrial protein, mRNA	ACO2	BC014092.2	50	ACO2	aconitase 2, mitochondrial	0.00116631	0.000727587	50.2723
62	Fatty acid elongation in mitochondria	Sus scrofa hydroxyacyl-Coenzyme A dehydrogenase/3-ketoacyl-Coenzyme A thiolase/enoyl-Coenzyme A hydratase (trifunctional protein), alpha subunit (HADHA), nuclear gene encoding mitochondrial protein, mRNA	HADHA	NM_000182.4	3030	HADHA	hydroxyacyl-Coenzyme A dehydrogenase/3-ketoacyl-Coenzyme A thiolase/enoyl-Coenzyme A hydratase (trifunctional protein), alpha subunit	0.00116631	0.000727587	50.2723
630	Glyoxylate and dicarboxylate metabolism	Sus scrofa citrate synthase (CS), nuclear gene encoding mitochondrial protein, mRNA	CS	BC072016.1	1431	CS	citrate synthase	0.00116631	0.000727587	50.2723
62	Fatty acid elongation in mitochondria	Sus scrofa L-3-hydroxyacyl-CoA dehydrogenase (HAD), mRNA	HAD	NM_005327.2	3033	HADH	hydroxyacyl-Coenzyme A dehydrogenase	0.00116631	0.000727587	50.2723
4920	Adipocytokine signaling pathway	Sus scrofa solute carrier family 2 (facilitated glucose transporter), member 4 (SLC2A4), mRNA	SLC2A4	NM_001042.2	6517	SLC2A4	solute carrier family 2 (facilitated glucose transporter), member 4	0.00144574	0.000880929	9.80923
4920	Adipocytokine signaling pathway	PREDICTED: Sus scrofa phosphoenolpyruvate carboxykinase 2 (PCK2), mRNA	PCK2	AK129934.1	5106	PCK2	phosphoenolpyruvate carboxykinase 2 (mitochondrial)	0.00144574	0.000880929	9.80923
4920	Adipocytokine signaling pathway	Sus scrofa peoxisome proliferative activated receptor gamma coactivator 1 (PPARGC1) mRNA, 3' untranslated region, partial sequence	PPARGC-1	NM_013261.3	10891	PPARGC1A	peroxisome proliferator-activated receptor gamma, coactivator 1 alpha	0.00144574	0.000880929	9.80923
4920	Adipocytokine signaling pathway	Sus scrofa peroxisome proliferator activated receptor gamma, coactivator 1 alpha (PPARGC-1), mRNA	PPARGC-1	NM_013261.3	10891	PPARGC1A	peroxisome proliferator-activated receptor gamma, coactivator 1 alpha	0.00144574	0.000880929	9.80923
4920	Adipocytokine signaling pathway	Sus scrofa carnitine palmitoyltransferase 1B (muscle) (CPT1B), nuclear gene encoding mitochondrial protein, mRNA	CPT1B	NM_152245.2	1375	CPT1B	carnitine palmitoyltransferase 1B (muscle)	0.00144574	0.000880929	9.80923
30	Pentose phosphate pathway	Sus scrofa phosphofructokinase, muscle (PFKM), mRNA	PFKM	NM_000289.5	5213	PFKM	phosphofructokinase, muscle	0.00287766	0.00169488	33.5149
30	Pentose phosphate pathway	Sus scrofa glucose phosphate isomerase (GPI), mRNA	GPI	NM_000175.2	2821	GPI	glucose phosphate isomerase	0.00287766	0.00169488	33.5149
4722	Neurotrophin signaling pathway	Sus scrofa activating transcription factor 4 (tax-responsive enhancer element B67) (ATF4), mRNA	ATF4	BC073990.1	468	ATF4	activating transcription factor 4 (tax-responsive enhancer element B67)	0.00380938	0.00219594	7.58827
4722	Neurotrophin signaling pathway	PREDICTED: Sus scrofa similar to RAP1A, member of RAS oncogene family (LOC100153199), mRNA	LOC100153199	BC014086.2	5906	RAP1A	RAP1A, member of RAS oncogene family	0.00380938	0.00219594	7.58827
4722	Neurotrophin signaling pathway	PREDICTED: Sus scrofa similar to calmodulin (LOC100154056), mRNA	LOC100154056	NM_006888.4	801	CALM1	calmodulin 1 (phosphorylase kinase, delta)	0.00380938	0.00219594	7.58827
4722	Neurotrophin signaling pathway	Sus scrofa mitogen-activated protein kinase 12 (MAPK12), mRNA	MAPK12					0.00380938	0.00219594	7.58827
5014	Amyotrophic lateral sclerosis (ALS)	PREDICTED: Sus scrofa similar to protein phosphatase 3, catalytic subunit, gamma (LOC100158082), mRNA	LOC100158082	AK299415.1	5533	PPP3CC	protein phosphatase 3 (formerly 2B), catalytic subunit, gamma isoform	0.00476113	0.00268623	11.1716
5014	Amyotrophic lateral sclerosis (ALS)	Sus scrofa catalase (CAT), mRNA	CAT	NM_001752.3	847	CAT	catalase	0.00476113	0.00268623	11.1716
5014	Amyotrophic lateral sclerosis (ALS)	Sus scrofa mitogen-activated protein kinase 12 (MAPK12), mRNA	MAPK12					0.00476113	0.00268623	11.1716
52	Galactose metabolism	Sus scrofa phosphofructokinase, muscle (PFKM), mRNA	PFKM	NM_000289.5	5213	PFKM	phosphofructokinase, muscle	0.0053015	0.00295543	25.1362
52	Galactose metabolism	Sus scrofa UDP-glucose pyrophosphorylase 2 (UGP2), mRNA	UGP2	BC000173.2	7360	UGP2	UDP-glucose pyrophosphorylase 2	0.0053015	0.00295543	25.1362
360	Phenylalanine metabolism	Sus scrofa glutamic-oxaloacetic transaminase 2, mitochondrial (aspartate aminotransferase 2) (GOT2), nuclear gene encoding mitochondrial protein, mRNA	GOT2	NM_002080.2	2806	GOT2	glutamic-oxaloacetic transaminase 2, mitochondrial (aspartate aminotransferase 2)	0.00677164	0.0036592	22.3433
360	Phenylalanine metabolism	Sus scrofa cytosolic aspartate aminotransferase (CASPAT), mRNA	CASPAT	NM_002079.2	2805	GOT1	glutamic-oxaloacetic transaminase 1, soluble (aspartate aminotransferase 1)	0.00677164	0.0036592	22.3433
4115	p53 signaling pathway	Sus scrofa growth arrest and DNA-damage-inducible, alpha (GADD45A), mRNA	GADD45A	NM_001924.2	1647	GADD45A	growth arrest and DNA-damage-inducible, alpha	0.00778432	0.00411939	9.42606
4115	p53 signaling pathway	PREDICTED: Sus scrofa similar to growth arrest and DNA-damage-inducible, gamma (LOC100152997), mRNA	LOC100152997	NM_006705.3	10912	GADD45G	growth arrest and DNA-damage-inducible, gamma	0.00778432	0.00411939	9.42606
4115	p53 signaling pathway	Sus scrofa cyclin G1 (LOC595110), mRNA	LOC595110	NM_004060.3	900	CCNG1	cyclin G1	0.00778432	0.00411939	9.42606
410	beta-Alanine metabolism	Sus scrofa hydroxyacyl-Coenzyme A dehydrogenase/3-ketoacyl-Coenzyme A thiolase/enoyl-Coenzyme A hydratase (trifunctional protein), alpha subunit (HADHA), nuclear gene encoding mitochondrial protein, mRNA	HADHA	NM_000182.4	3030	HADHA	hydroxyacyl-Coenzyme A dehydrogenase/3-ketoacyl-Coenzyme A thiolase/enoyl-Coenzyme A hydratase (trifunctional protein), alpha subunit	0.00840923	0.00439398	20.1089
410	beta-Alanine metabolism	Sus scrofa acyl-Coenzyme A dehydrogenase, C-4 to C-12 straight chain (ACADM), nuclear gene encoding mitochondrial protein, mRNA	ACADM	NM_000016.4	34	ACADM	acyl-Coenzyme A dehydrogenase, C-4 to C-12 straight chain	0.00840923	0.00439398	20.1089
4260	Cardiac muscle contraction	Sus scrofa TPM3 (TPM3) mRNA, complete cds	TPM3	BC008407.1	7170	TPM3	tropomyosin 3	0.00925557	0.00475502	8.87159
4260	Cardiac muscle contraction	Sus scrofa cytochrome c oxidase subunit VIIc (COX7C), nuclear gene encoding mitochondrial protein, mRNA	COX7C	NM_001867.2	1350	COX7C	cytochrome c oxidase subunit VIIc	0.00925557	0.00475502	8.87159
4260	Cardiac muscle contraction	PREDICTED: Sus scrofa Na,K-ATPase alpha 2 subunit (LOC396828), mRNA	LOC396828	AB018321.2	477	ATP1A2	ATPase, Na+/K+ transporting, alpha 2 (+) polypeptide	0.00925557	0.00475502	8.87159
4260	Cardiac muscle contraction	1139821 MARC 4PIG Sus scrofa cDNA 3', mRNA sequence	COX7C					0.00925557	0.00475502	8.87159
500	Starch and sucrose metabolism	Sus scrofa UDP-glucose pyrophosphorylase 2 (UGP2), mRNA	UGP2	BC000173.2	7360	UGP2	UDP-glucose pyrophosphorylase 2	0.0121731	0.00609548	16.7574
500	Starch and sucrose metabolism	Sus scrofa glucose phosphate isomerase (GPI), mRNA	GPI	NM_000175.2	2821	GPI	glucose phosphate isomerase	0.0121731	0.00609548	16.7574
910	Nitrogen metabolism	PREDICTED: Sus scrofa similar to carbonic anhydrase 14 (LOC100153371), mRNA	LOC100153371	AK315469.1	23632	CA14	carbonic anhydrase XIV	0.016566	0.00799048	14.3635
910	Nitrogen metabolism	Sus scrofa glutamine synthetase mRNA, partial cds	GLUL	NM_001033056.2	2752	GLUL	glutamate-ammonia ligase (glutamine synthetase)	0.016566	0.00799048	14.3635
4270	Vascular smooth muscle contraction	PREDICTED: Sus scrofa similar to calmodulin (LOC100154056), mRNA	LOC100154056	NM_006888.4	801	CALM1	calmodulin 1 (phosphorylase kinase, delta)	0.0167536	0.00806829	7.18176
4270	Vascular smooth muscle contraction	Sus scrofa protein phosphatase 1, catalytic subunit, beta isoform (PPP1CB), mRNA	PPP1CB	BX647970.1	5500	PPP1CB	protein phosphatase 1, catalytic subunit, beta isoform	0.0167536	0.00806829	7.18176
4270	Vascular smooth muscle contraction	AJ952110 KN404_1 Sus scrofa cDNA clone C0007745h04 3', mRNA sequence	LOC733612					0.0167536	0.00806829	7.18176
565	Ether lipid metabolism	Sus scrofa clone Clu_71225.scr.msk.p1.Contig1, mRNA sequence	PLA2G7	NM_005084.3	7941	PLA2G7	phospholipase A2, group VII (platelet-activating factor acetylhydrolase, plasma)	0.0189902	0.00897778	13.406
565	Ether lipid metabolism	PREDICTED: Sus scrofa similar to lysophosphatidic acid acyltransferase zeta (LOC100152836), mRNA	AGPAT6					0.0189902	0.00897778	13.406
4912	GnRH signaling pathway	Sus scrofa activating transcription factor 4 (tax-responsive enhancer element B67) (ATF4), mRNA	ATF4	BC073990.1	468	ATF4	activating transcription factor 4 (tax-responsive enhancer element B67)	0.0202631	0.00948066	6.70298
4912	GnRH signaling pathway	PREDICTED: Sus scrofa similar to calmodulin (LOC100154056), mRNA	LOC100154056	NM_006888.4	801	CALM1	calmodulin 1 (phosphorylase kinase, delta)	0.0202631	0.00948066	6.70298
4912	GnRH signaling pathway	Sus scrofa mitogen-activated protein kinase 12 (MAPK12), mRNA	MAPK12					0.0202631	0.00948066	6.70298
5215	Prostate cancer	Sus scrofa activating transcription factor 4 (tax-responsive enhancer element B67) (ATF4), mRNA	ATF4	BC073990.1	468	ATF4	activating transcription factor 4 (tax-responsive enhancer element B67)	0.0241681	0.0110828	6.28404
5215	Prostate cancer	PREDICTED: Sus scrofa heat shock 90kD protein 1, beta (HSPCB), mRNA	HSPCB	AK297367.1	3326	HSP90AB1	heat shock protein 90kDa alpha (cytosolic), class B member 1	0.0241681	0.0110828	6.28404
5215	Prostate cancer	Sus scrofa 90-kDa heat shock protein (HSP90), mRNA	HSP90	NM_005348.3	3320	HSP90AA1	heat shock protein 90kDa alpha (cytosolic), class A member 1	0.0241681	0.0110828	6.28404
4930	Type II diabetes mellitus	Sus scrofa solute carrier family 2 (facilitated glucose transporter), member 4 (SLC2A4), mRNA	SLC2A4	NM_001042.2	6517	SLC2A4	solute carrier family 2 (facilitated glucose transporter), member 4	0.0271355	0.0122583	11.1716
4930	Type II diabetes mellitus	PREDICTED: Sus scrofa similar to pyruvate kinase 3, transcript variant 2 (LOC100158154), mRNA	PKM2	BC007640.1	5315	PKM2	pyruvate kinase, muscle	0.0271355	0.0122583	11.1716
4930	Type II diabetes mellitus	PREDICTED: Sus scrofa similar to pyruvate kinase 3, transcript variant 3 (LOC100158154), mRNA	PKM2	AK309781.1	5315	PKM2	pyruvate kinase, muscle	0.0271355	0.0122583	11.1716
730	Thiamine metabolism	Sus scrofa nitrogen fixation 1-like protein (LOC100156145), mRNA	LOC100156145	NM_021100.3	9054	NFS1	NFS1 nitrogen fixation 1 homolog (S. cerevisiae)	0.0395864	0.0170571	50.2723
3050	Proteasome	PREDICTED: Sus scrofa similar to Proteasome (prosome, macropain) subunit, beta type, 4 (LOC100153923), mRNA	LOC100153923	BC008314.2	5692	PSMB4	proteasome (prosome, macropain) subunit, beta type, 4	0.0434367	0.0184527	8.74301
564	Glycerophospholipid metabolism	PREDICTED: Sus scrofa similar to Phosphatidylserine synthase 1 (LOC100156809), mRNA	LOC100156809	BC002376.2	9791	PTDSS1	phosphatidylserine synthase 1	0.0434367	0.0184527	8.74301
3050	Proteasome	Sus scrofa Tat-binding protein 10 (TBP10), mRNA	TBP10	CR610576.1	5705	PSMC5	proteasome (prosome, macropain) 26S subunit, ATPase, 5	0.0434367	0.0184527	8.74301
3050	Proteasome	Sus scrofa mRNA, clone:THY010107F05, expressed in thymus	LOC100153923	BC008314.2	5692	PSMB4	proteasome (prosome, macropain) subunit, beta type, 4	0.0434367	0.0184527	8.74301
564	Glycerophospholipid metabolism	PREDICTED: Sus scrofa similar to lysophosphatidic acid acyltransferase zeta (LOC100152836), mRNA	AGPAT6					0.0434367	0.0184527	8.74301
4370	VEGF signaling pathway	PREDICTED: Sus scrofa similar to protein phosphatase 3, catalytic subunit, gamma (LOC100158082), mRNA	LOC100158082	AK299415.1	5533	PPP3CC	protein phosphatase 3 (formerly 2B), catalytic subunit, gamma isoform	0.0547245	0.0223264	7.7342
4370	VEGF signaling pathway	Sus scrofa mitogen-activated protein kinase 12 (MAPK12), mRNA	MAPK12					0.0547245	0.0223264	7.7342
982	Drug metabolism - cytochrome P450	Sus scrofa flavin containing monooxygenase 1 (FMO1), mRNA	FMO1	AK290113.1	2326	FMO1	flavin containing monooxygenase 1	0.0587216	0.0236256	7.44775
982	Drug metabolism - cytochrome P450	Sus scrofa cytochrome P450 2B22 (CYP2B22), mRNA	CYP2B22	NR_001278.1	1556	CYP2B7P1	cytochrome P450, family 2, subfamily B, polypeptide 7 pseudogene 1	0.0587216	0.0236256	7.44775
5211	Renal cell carcinoma	PREDICTED: Sus scrofa similar to RAP1A, member of RAS oncogene family (LOC100153199), mRNA	LOC100153199	BC014086.2	5906	RAP1A	RAP1A, member of RAS oncogene family	0.0628315	0.0249243	7.18176
5211	Renal cell carcinoma	PREDICTED: Sus scrofa similar to elongation factor SIII p15 subunit (LOC100153381), mRNA	LOC100153381	BC100283.1	6921	TCEB1	transcription elongation factor B (SIII), polypeptide 1 (15kDa, elongin C)	0.0628315	0.0249243	7.18176
970	Aminoacyl-tRNA biosynthesis	PREDICTED: Sus scrofa similar to seryl-tRNA synthetase (LOC100155484), mRNA	LOC100155484	NM_006513.2	6301	SARS	seryl-tRNA synthetase	0.0783926	0.0295284	25.1362
460	Cyanoamino acid metabolism	PREDICTED: Sus scrofa similar to Serine hydroxymethyltransferase 2 (mitochondrial) (LOC100152340), mRNA	LOC100152340	NM_005412.5	6472	SHMT2	serine hydroxymethyltransferase 2 (mitochondrial)	0.0783926	0.0295284	25.1362
130	Ubiquinone and other terpenoid-quinone biosynthesis	PREDICTED: Sus scrofa similar to coenzyme Q5 homolog, methyltransferase (LOC100157055), mRNA	LOC100157055	NM_032314.3	84274	COQ5	coenzyme Q5 homolog, methyltransferase (S. cerevisiae)	0.0783926	0.0295284	25.1362
61	Fatty acid biosynthesis	PREDICTED: Sus scrofa similar to Acetyl-CoA carboxylase 2 (ACC-beta) (LOC100154993), mRNA	LOC100154993	AJ575592.3	32	ACACB	acetyl-Coenzyme A carboxylase beta	0.0783926	0.0295284	25.1362
40	Pentose and glucuronate interconversions	Sus scrofa UDP-glucose pyrophosphorylase 2 (UGP2), mRNA	UGP2	BC000173.2	7360	UGP2	UDP-glucose pyrophosphorylase 2	0.0783926	0.0295284	25.1362
590	Arachidonic acid metabolism	Sus scrofa glutathione peroxidase 3 (GPX3), mRNA	GPX3	AK310242.1	2878	GPX3	glutathione peroxidase 3 (plasma)	0.0803468	0.0300739	6.28404
590	Arachidonic acid metabolism	Sus scrofa cytochrome P450 2B22 (CYP2B22), mRNA	CYP2B22	NR_001278.1	1556	CYP2B7P1	cytochrome P450, family 2, subfamily B, polypeptide 7 pseudogene 1	0.0803468	0.0300739	6.28404
4730	Long-term depression	Sus scrofa protein phosphatase 2 (formerly 2A), catalytic subunit, alpha isoform (PPP2CA), mRNA	PPP2CA	NM_002715.2	5515	PPP2CA	protein phosphatase 2 (formerly 2A), catalytic subunit, alpha isoform	0.084982	0.0313511	6.09361
4730	Long-term depression	Sus scrofa ryanodine receptor 1 (RYR1), mRNA	RYR1	NM_001042723.1	6261	RYR1	ryanodine receptor 1 (skeletal)	0.084982	0.0313511	6.09361
632	Benzoate degradation via CoA ligation	Sus scrofa hydroxyacyl-Coenzyme A dehydrogenase/3-ketoacyl-Coenzyme A thiolase/enoyl-Coenzyme A hydratase (trifunctional protein), alpha subunit (HADHA), nuclear gene encoding mitochondrial protein, mRNA	HADHA	NM_000182.4	3030	HADHA	hydroxyacyl-Coenzyme A dehydrogenase/3-ketoacyl-Coenzyme A thiolase/enoyl-Coenzyme A hydratase (trifunctional protein), alpha subunit	0.097508	0.0346253	20.1089
903	Limonene and pinene degradation	Sus scrofa hydroxyacyl-Coenzyme A dehydrogenase/3-ketoacyl-Coenzyme A thiolase/enoyl-Coenzyme A hydratase (trifunctional protein), alpha subunit (HADHA), nuclear gene encoding mitochondrial protein, mRNA	HADHA	NM_000182.4	3030	HADHA	hydroxyacyl-Coenzyme A dehydrogenase/3-ketoacyl-Coenzyme A thiolase/enoyl-Coenzyme A hydratase (trifunctional protein), alpha subunit	0.097508	0.0346253	20.1089
5200	Pathways in cancer	Sus scrofa TPM3 (TPM3) mRNA, complete cds	TPM3	BC008407.1	7170	TPM3	tropomyosin 3	0.0984844	0.0348703	2.91434
5200	Pathways in cancer	PREDICTED: Sus scrofa similar to elongation factor SIII p15 subunit (LOC100153381), mRNA	LOC100153381	BC100283.1	6921	TCEB1	transcription elongation factor B (SIII), polypeptide 1 (15kDa, elongin C)	0.0984844	0.0348703	2.91434
5200	Pathways in cancer	PREDICTED: Sus scrofa heat shock 90kD protein 1, beta (HSPCB), mRNA	HSPCB	AK297367.1	3326	HSP90AB1	heat shock protein 90kDa alpha (cytosolic), class B member 1	0.0984844	0.0348703	2.91434
5200	Pathways in cancer	Sus scrofa 90-kDa heat shock protein (HSP90), mRNA	HSP90	NM_005348.3	3320	HSP90AA1	heat shock protein 90kDa alpha (cytosolic), class A member 1	0.0984844	0.0348703	2.91434
670	One carbon pool by folate	PREDICTED: Sus scrofa similar to Serine hydroxymethyltransferase 2 (mitochondrial) (LOC100152340), mRNA	LOC100152340	NM_005412.5	6472	SHMT2	serine hydroxymethyltransferase 2 (mitochondrial)	0.116434	0.0399587	16.7574
120	Primary bile acid biosynthesis	Sus scrofa hydroxysteroid (17-beta) dehydrogenase 4 (HSD17B4), mRNA	HSD17B4	NM_000414.2	3295	HSD17B4	hydroxysteroid (17-beta) dehydrogenase 4	0.116434	0.0399587	16.7574
720	Reductive carboxylate cycle (CO2 fixation)	Sus scrofa aconitase 2, mitochondrial (ACO2), nuclear gene encoding mitochondrial protein, mRNA	ACO2	BC014092.2	50	ACO2	aconitase 2, mitochondrial	0.135173	0.0449474	14.3635
4360	Axon guidance	Sus scrofa CFL2b variant 1 (CFL2b) mRNA, complete cds	CFL2	NR_028132.1	1073	CFL2	cofilin 2 (muscle)	0.147568	0.0480802	4.46865
4360	Axon guidance	PREDICTED: Sus scrofa similar to protein phosphatase 3, catalytic subunit, gamma (LOC100158082), mRNA	LOC100158082	AK299415.1	5533	PPP3CC	protein phosphatase 3 (formerly 2B), catalytic subunit, gamma isoform	0.147568	0.0480802	4.46865
1040	Biosynthesis of unsaturated fatty acids	Sus scrofa hydroxyacyl-Coenzyme A dehydrogenase/3-ketoacyl-Coenzyme A thiolase/enoyl-Coenzyme A hydratase (trifunctional protein), alpha subunit (HADHA), nuclear gene encoding mitochondrial protein, mRNA	HADHA	NM_000182.4	3030	HADHA	hydroxyacyl-Coenzyme A dehydrogenase/3-ketoacyl-Coenzyme A thiolase/enoyl-Coenzyme A hydratase (trifunctional protein), alpha subunit	0.153726	0.0495903	12.5681
512	O-Glycan biosynthesis	Sus scrofa O-linked N-acetylglucosamine (GlcNAc) transferase (UDP-N-acetylglucosamine:polypeptide-N-acetylglucosaminyl transferase) (OGT), mRNA	OGT	NM_181672.2	8473	OGT	O-linked N-acetylglucosamine (GlcNAc) transferase (UDP-N-acetylglucosamine:polypeptide-N-acetylglucosaminyl transferase)	0.153726	0.0495903	12.5681
4110	Cell cycle	Sus scrofa growth arrest and DNA-damage-inducible, alpha (GADD45A), mRNA	GADD45A	NM_001924.2	1647	GADD45A	growth arrest and DNA-damage-inducible, alpha	0.159096	0.0508828	4.2785
4110	Cell cycle	PREDICTED: Sus scrofa similar to growth arrest and DNA-damage-inducible, gamma (LOC100152997), mRNA	LOC100152997	NM_006705.3	10912	GADD45G	growth arrest and DNA-damage-inducible, gamma	0.159096	0.0508828	4.2785
230	Purine metabolism	Sus scrofa adenylosuccinate synthase like 1 (ADSSL1), mRNA	ADSSL1	BC047904.1	122622	ADSSL1	adenylosuccinate synthase like 1	0.170894	0.0536463	4.10386
230	Purine metabolism	PREDICTED: Sus scrofa similar to pyruvate kinase 3, transcript variant 2 (LOC100158154), mRNA	PKM2	BC007640.1	5315	PKM2	pyruvate kinase, muscle	0.170894	0.0536463	4.10386
230	Purine metabolism	PREDICTED: Sus scrofa similar to pyruvate kinase 3, transcript variant 3 (LOC100158154), mRNA	PKM2	AK309781.1	5315	PKM2	pyruvate kinase, muscle	0.170894	0.0536463	4.10386
4612	Antigen processing and presentation	PREDICTED: Sus scrofa heat shock 90kD protein 1, beta (HSPCB), mRNA	HSPCB	AK297367.1	3326	HSP90AB1	heat shock protein 90kDa alpha (cytosolic), class B member 1	0.170894	0.0536463	4.10386
4612	Antigen processing and presentation	Sus scrofa 90-kDa heat shock protein (HSP90), mRNA	HSP90	NM_005348.3	3320	HSP90AA1	heat shock protein 90kDa alpha (cytosolic), class A member 1	0.170894	0.0536463	4.10386
4310	Wnt signaling pathway	PREDICTED: Sus scrofa similar to protein phosphatase 3, catalytic subunit, gamma (LOC100158082), mRNA	LOC100158082	AK299415.1	5533	PPP3CC	protein phosphatase 3 (formerly 2B), catalytic subunit, gamma isoform	0.17689	0.0550119	4.02179
4310	Wnt signaling pathway	Sus scrofa protein phosphatase 2 (formerly 2A), catalytic subunit, alpha isoform (PPP2CA), mRNA	PPP2CA	NM_002715.2	5515	PPP2CA	protein phosphatase 2 (formerly 2A), catalytic subunit, alpha isoform	0.17689	0.0550119	4.02179
3022	Basal transcription factors	PREDICTED: Sus scrofa similar to TBP-associated factor 5 (LOC100152210), mRNA	LOC100152210	BC136348.1	6877	TAF5	TAF5 RNA polymerase II, TATA box binding protein (TBP)-associated factor, 100kDa	0.190282	0.0579721	10.0545
450	Selenoamino acid metabolism	Sus scrofa S-adenosylhomocysteine hydrolase (AHCY), mRNA	AHCY	NM_000687.2	191	AHCY	adenosylhomocysteinase	0.190282	0.0579721	10.0545
2010	ABC transporters	PREDICTED: Sus scrofa similar to ATP-binding cassette, sub-family B, member 6 (LOC100155585), mRNA	LOC100155585	AF308472.1	10058	ABCB6	ATP-binding cassette, sub-family B (MDR/TAP), member 6	0.208289	0.0626167	9.14042
51	Fructose and mannose metabolism	Sus scrofa phosphofructokinase, muscle (PFKM), mRNA	PFKM	NM_000289.5	5213	PFKM	phosphofructokinase, muscle	0.24377	0.0714168	7.7342
4330	Notch signaling pathway	Sus scrofa nuclear receptor corepressor 2 (LOC733643), mRNA	LOC733643	NM_001077261.1	9612	NCOR2	nuclear receptor co-repressor 2	0.24377	0.0714168	7.7342
4660	T cell receptor signaling pathway	PREDICTED: Sus scrofa similar to protein phosphatase 3, catalytic subunit, gamma (LOC100158082), mRNA	LOC100158082	AK299415.1	5533	PPP3CC	protein phosphatase 3 (formerly 2B), catalytic subunit, gamma isoform	0.253173	0.0736742	3.24338
4660	T cell receptor signaling pathway	Sus scrofa mitogen-activated protein kinase 12 (MAPK12), mRNA	MAPK12					0.253173	0.0736742	3.24338
4150	mTOR signaling pathway	PREDICTED: Sus scrofa similar to DNA-damage-inducible transcript 4 protein (Protein regulated in development and DNA damage response 1) (REDD-1) (HIF-1 responsive protein RTP801) (LOC100153821), mRNA	LOC100153821	NM_019058.2	54541	DDIT4	DNA-damage-inducible transcript 4	0.278552	0.0796191	6.70298
520	Amino sugar and nucleotide sugar metabolism	Sus scrofa UDP-glucose pyrophosphorylase 2 (UGP2), mRNA	UGP2	BC000173.2	7360	UGP2	UDP-glucose pyrophosphorylase 2	0.295684	0.0835142	6.28404
5216	Thyroid cancer	Sus scrofa TPM3 (TPM3) mRNA, complete cds	TPM3	BC008407.1	7170	TPM3	tropomyosin 3	0.312647	0.0872808	5.91439
5020	Prion diseases	PREDICTED: Sus scrofa heat shock 70kDa protein 5 (HSPA5), partial mRNA	HSPA5	NM_005347.3	3309	HSPA5	heat shock 70kDa protein 5 (glucose-regulated protein, 78kDa)	0.329442	0.0909249	5.58581
830	Retinol metabolism	Sus scrofa cytochrome P450 2B22 (CYP2B22), mRNA	CYP2B22	NR_001278.1	1556	CYP2B7P1	cytochrome P450, family 2, subfamily B, polypeptide 7 pseudogene 1	0.34607	0.0944523	5.29182
561	Glycerolipid metabolism	PREDICTED: Sus scrofa similar to lysophosphatidic acid acyltransferase zeta (LOC100152836), mRNA	AGPAT6					0.34607	0.0944523	5.29182
4070	Phosphatidylinositol signaling system	PREDICTED: Sus scrofa similar to calmodulin (LOC100154056), mRNA	LOC100154056	NM_006888.4	801	CALM1	calmodulin 1 (phosphorylase kinase, delta)	0.378834	0.102288	4.78784
980	Metabolism of xenobiotics by cytochrome P450	Sus scrofa cytochrome P450 2B22 (CYP2B22), mRNA	CYP2B22	NR_001278.1	1556	CYP2B7P1	cytochrome P450, family 2, subfamily B, polypeptide 7 pseudogene 1	0.426773	0.113455	4.18936
480	Glutathione metabolism	Sus scrofa glutathione peroxidase 3 (GPX3), mRNA	GPX3	AK310242.1	2878	GPX3	glutathione peroxidase 3 (plasma)	0.442436	0.117029	4.02179
5214	Glioma	PREDICTED: Sus scrofa similar to calmodulin (LOC100154056), mRNA	LOC100154056	NM_006888.4	801	CALM1	calmodulin 1 (phosphorylase kinase, delta)	0.4733	0.123968	3.72388
4520	Adherens junction	PREDICTED: Sus scrofa similar to Actinin, alpha 2 (LOC100157406), mRNA	LOC100157406	NM_001103.2	88	ACTN2	actinin, alpha 2	0.503554	0.13064	3.46706
4664	Fc epsilon RI signaling pathway	Sus scrofa mitogen-activated protein kinase 12 (MAPK12), mRNA	MAPK12					0.562284	0.143687	3.04681
4916	Melanogenesis	PREDICTED: Sus scrofa similar to calmodulin (LOC100154056), mRNA	LOC100154056	NM_006888.4	801	CALM1	calmodulin 1 (phosphorylase kinase, delta)	0.632479	0.158777	2.64591
4662	B cell receptor signaling pathway	PREDICTED: Sus scrofa similar to protein phosphatase 3, catalytic subunit, gamma (LOC100158082), mRNA	LOC100158082	AK299415.1	5533	PPP3CC	protein phosphatase 3 (formerly 2B), catalytic subunit, gamma isoform	0.632479	0.158777	2.64591
4540	Gap junction	PREDICTED: Sus scrofa similar to alpha-tubulin isotype M-alpha-6 (LOC100151951), mRNA	LOC100151951	AK054731.1	7277	TUBA4A	tubulin, alpha 4a	0.646103	0.161644	2.57807
4120	Ubiquitin mediated proteolysis	PREDICTED: Sus scrofa similar to elongation factor SIII p15 subunit (LOC100153381), mRNA	LOC100153381	BC100283.1	6921	TCEB1	transcription elongation factor B (SIII), polypeptide 1 (15kDa, elongin C)	0.672947	0.167237	2.45231
4350	TGF-beta signaling pathway	Sus scrofa protein phosphatase 2 (formerly 2A), catalytic subunit, alpha isoform (PPP2CA), mRNA	PPP2CA	NM_002715.2	5515	PPP2CA	protein phosphatase 2 (formerly 2A), catalytic subunit, alpha isoform	0.672947	0.167237	2.45231
4210	Apoptosis	PREDICTED: Sus scrofa similar to protein phosphatase 3, catalytic subunit, gamma (LOC100158082), mRNA	LOC100158082	AK299415.1	5533	PPP3CC	protein phosphatase 3 (formerly 2B), catalytic subunit, gamma isoform	0.737762	0.180438	2.18575
4650	Natural killer cell mediated cytotoxicity	PREDICTED: Sus scrofa similar to protein phosphatase 3, catalytic subunit, gamma (LOC100158082), mRNA	LOC100158082	AK299415.1	5533	PPP3CC	protein phosphatase 3 (formerly 2B), catalytic subunit, gamma isoform	0.834973	0.199471	1.86194
4620	Toll-like receptor signaling pathway	Sus scrofa mitogen-activated protein kinase 12 (MAPK12), mRNA	MAPK12					0.891906	0.210213	1.70415
4514	Cell adhesion molecules (CAMs)	PREDICTED: Sus scrofa similar to Myelin P0 protein precursor (Myelin protein zero) (Myelin peripheral protein) (MPP) (LOC100153273), mRNA	LOC100153273	NM_000530.5	4359	MPZ	myelin protein zero	0.935452	0.218237	1.59595
4062	Chemokine signaling pathway	PREDICTED: Sus scrofa similar to RAP1A, member of RAS oncogene family (LOC100153199), mRNA	LOC100153199	BC014086.2	5906	RAP1A	RAP1A, member of RAS oncogene family	1	0.229834	1.25681
4740	Olfactory transduction	PREDICTED: Sus scrofa similar to calmodulin (LOC100154056), mRNA	LOC100154056	NM_006888.4	801	CALM1	calmodulin 1 (phosphorylase kinase, delta)	1	0.229834	0.874301
5322	Systemic lupus erythematosus	PREDICTED: Sus scrofa similar to Actinin, alpha 2 (LOC100157406), mRNA	LOC100157406	NM_001103.2	88	ACTN2	actinin, alpha 2	1	0.229834	1.25681

## Sheet: LR6 vs LR5-down regulation
path_id	path_name	pig_Description	pig_Gene symbol	human_Genebank	human_Gene ID	human_Gene	human_Gene des	pvalue	FDR	enrichment
5200	Pathways in cancer	PREDICTED: Sus scrofa similar to CDC28 protein kinase 1B (LOC100155110), mRNA	LOC100155110	BC070320.1	1163	CKS1B	CDC28 protein kinase regulatory subunit 1B	2.23223e-06	0.000115315	6.50446
5200	Pathways in cancer	PREDICTED: Sus scrofa similar to Protein CBFA2T1 (Protein MTG8) (Protein ETO) (Eight twenty one protein) (Cyclin-D-related protein) (Zinc finger MYND domain-containing protein 2) (LOC100155449), mRNA	LOC100155449	NM_175634.1	862	RUNX1T1	runt-related transcription factor 1; translocated to, 1 (cyclin D-related)	2.23223e-06	0.000115315	6.50446
5200	Pathways in cancer	PREDICTED: Sus scrofa similar to Histone acetyltransferase p300 (E1A-associated protein p300) (LOC100156226), mRNA	LOC100156226	BC172280.1	2033	EP300	E1A binding protein p300	2.23223e-06	0.000115315	6.50446
5200	Pathways in cancer	PREDICTED: Sus scrofa similar to cyclin-dependent kinase-2 alpha, transcript variant 1 (LOC100154715), mRNA	LOC100154715	NM_001798.3	1017	CDK2	cyclin-dependent kinase 2	2.23223e-06	0.000115315	6.50446
5200	Pathways in cancer	PREDICTED: Sus scrofa similar to cyclin-dependent kinase-2 alpha, transcript variant 2 (LOC100154715), mRNA	LOC100154715	NM_001798.3	1017	CDK2	cyclin-dependent kinase 2	2.23223e-06	0.000115315	6.50446
5200	Pathways in cancer	PREDICTED: Sus scrofa similar to transcription factor 7-like 2 (T-cell specific, HMG-box) (LOC100153922), mRNA	TCF7L2	NM_030756.4	6934	TCF7L2	transcription factor 7-like 2 (T-cell specific, HMG-box)	2.23223e-06	0.000115315	6.50446
5200	Pathways in cancer	PREDICTED: Sus scrofa similar to E2F transcription factor 1 (LOC100153846), mRNA	LOC100153846	NM_005225.2	1869	E2F1	E2F transcription factor 1	2.23223e-06	0.000115315	6.50446
5200	Pathways in cancer	Sus scrofa retinoid X receptor, gamma (RXRG), mRNA	RXRG	BC012063.1	6258	RXRG	retinoid X receptor, gamma	2.23223e-06	0.000115315	6.50446
5200	Pathways in cancer	Sus scrofa epidermal growth factor (EGF), mRNA	EGF	BC113461.1	1950	EGF	epidermal growth factor (beta-urogastrone)	2.23223e-06	0.000115315	6.50446
5200	Pathways in cancer	Sus scrofa heat shock protein 90kDa beta (Grp94), member 1 (HSP90B1), mRNA	HSP90B1	NM_003299.1	7184	HSP90B1	heat shock protein 90kDa beta (Grp94), member 1	2.23223e-06	0.000115315	6.50446
5200	Pathways in cancer	Sus scrofa putative inhibitor of apoptosis (PIAP), mRNA	PIAP	NM_182962.1	330	BIRC3	baculoviral IAP repeat-containing 3	2.23223e-06	0.000115315	6.50446
5200	Pathways in cancer	Sus scrofa gelatinase A (MMP-2), mRNA	MMP-2	NM_004530.4	4313	MMP2	matrix metallopeptidase 2 (gelatinase A, 72kDa gelatinase, 72kDa type IV collagenase)	2.23223e-06	0.000115315	6.50446
5215	Prostate cancer	PREDICTED: Sus scrofa similar to Histone acetyltransferase p300 (E1A-associated protein p300) (LOC100156226), mRNA	LOC100156226	BC172280.1	2033	EP300	E1A binding protein p300	5.11129e-05	0.00132022	10.2002
5215	Prostate cancer	PREDICTED: Sus scrofa similar to cyclin-dependent kinase-2 alpha, transcript variant 1 (LOC100154715), mRNA	LOC100154715	NM_001798.3	1017	CDK2	cyclin-dependent kinase 2	5.11129e-05	0.00132022	10.2002
5215	Prostate cancer	PREDICTED: Sus scrofa similar to cyclin-dependent kinase-2 alpha, transcript variant 2 (LOC100154715), mRNA	LOC100154715	NM_001798.3	1017	CDK2	cyclin-dependent kinase 2	5.11129e-05	0.00132022	10.2002
5215	Prostate cancer	PREDICTED: Sus scrofa similar to transcription factor 7-like 2 (T-cell specific, HMG-box) (LOC100153922), mRNA	TCF7L2	NM_030756.4	6934	TCF7L2	transcription factor 7-like 2 (T-cell specific, HMG-box)	5.11129e-05	0.00132022	10.2002
5215	Prostate cancer	PREDICTED: Sus scrofa similar to E2F transcription factor 1 (LOC100153846), mRNA	LOC100153846	NM_005225.2	1869	E2F1	E2F transcription factor 1	5.11129e-05	0.00132022	10.2002
5215	Prostate cancer	Sus scrofa epidermal growth factor (EGF), mRNA	EGF	BC113461.1	1950	EGF	epidermal growth factor (beta-urogastrone)	5.11129e-05	0.00132022	10.2002
5215	Prostate cancer	Sus scrofa heat shock protein 90kDa beta (Grp94), member 1 (HSP90B1), mRNA	HSP90B1	NM_003299.1	7184	HSP90B1	heat shock protein 90kDa beta (Grp94), member 1	5.11129e-05	0.00132022	10.2002
3010	Ribosome	Sus scrofa ribosomal protein L14 (RPL14), mRNA	RPL14	NM_003973.3	9045	RPL14	ribosomal protein L14	0.000168567	0.00237582	11.0272
3010	Ribosome	Sus scrofa ribosomal protein SA (RPSA), mRNA	RPSA	BC005391.1	3921	RPSA	ribosomal protein SA	0.000168567	0.00237582	11.0272
3010	Ribosome	Sus scrofa ribosomal protein S20 (RPS20), mRNA	RPS20	NM_001023.3	6224	RPS20	ribosomal protein S20	0.000168567	0.00237582	11.0272
3010	Ribosome	Sus scrofa heparin binding protein (HBP15/L22), mRNA	HBP15/L22	AF136171.1	6146	RPL22	ribosomal protein L22	0.000168567	0.00237582	11.0272
3010	Ribosome	Sus scrofa mRNA, clone:OVR010070H08, expressed in ovary	LOC100049695	AK129823.1	6175	RPLP0	ribosomal protein, large, P0	0.000168567	0.00237582	11.0272
3010	Ribosome	1103217 MARC 4PIG Sus scrofa cDNA 3', mRNA sequence	RPS20					0.000168567	0.00237582	11.0272
5222	Small cell lung cancer	PREDICTED: Sus scrofa similar to CDC28 protein kinase 1B (LOC100155110), mRNA	LOC100155110	BC070320.1	1163	CKS1B	CDC28 protein kinase regulatory subunit 1B	0.000192176	0.00248191	10.737
5222	Small cell lung cancer	PREDICTED: Sus scrofa similar to cyclin-dependent kinase-2 alpha, transcript variant 1 (LOC100154715), mRNA	LOC100154715	NM_001798.3	1017	CDK2	cyclin-dependent kinase 2	0.000192176	0.00248191	10.737
5222	Small cell lung cancer	PREDICTED: Sus scrofa similar to cyclin-dependent kinase-2 alpha, transcript variant 2 (LOC100154715), mRNA	LOC100154715	NM_001798.3	1017	CDK2	cyclin-dependent kinase 2	0.000192176	0.00248191	10.737
5222	Small cell lung cancer	PREDICTED: Sus scrofa similar to E2F transcription factor 1 (LOC100153846), mRNA	LOC100153846	NM_005225.2	1869	E2F1	E2F transcription factor 1	0.000192176	0.00248191	10.737
5222	Small cell lung cancer	Sus scrofa retinoid X receptor, gamma (RXRG), mRNA	RXRG	BC012063.1	6258	RXRG	retinoid X receptor, gamma	0.000192176	0.00248191	10.737
5222	Small cell lung cancer	Sus scrofa putative inhibitor of apoptosis (PIAP), mRNA	PIAP	NM_182962.1	330	BIRC3	baculoviral IAP repeat-containing 3	0.000192176	0.00248191	10.737
4350	TGF-beta signaling pathway	PREDICTED: Sus scrofa similar to Histone acetyltransferase p300 (E1A-associated protein p300) (LOC100156226), mRNA	LOC100156226	BC172280.1	2033	EP300	E1A binding protein p300	0.000278448	0.00287687	9.9514
4350	TGF-beta signaling pathway	PREDICTED: Sus scrofa similar to activin A type I receptor (LOC100152307), mRNA	LOC100152307	NM_001111067.2	90	ACVR1	activin A receptor, type I	0.000278448	0.00287687	9.9514
4350	TGF-beta signaling pathway	Sus scrofa bone morphogenetic protein receptor type IB (BMPR-IB) mRNA, partial cds	BMPR1B	AK299930.1	658	BMPR1B	bone morphogenetic protein receptor, type IB	0.000278448	0.00287687	9.9514
4350	TGF-beta signaling pathway	Sus scrofa SMAD family member 1 (SMAD1), mRNA	SMAD1	BC001878.1	4086	SMAD1	SMAD family member 1	0.000278448	0.00287687	9.9514
4350	TGF-beta signaling pathway	Sus scrofa decorin (DCN), mRNA	DCN	NM_001920.3	1634	DCN	decorin	0.000278448	0.00287687	9.9514
4350	TGF-beta signaling pathway	Sus scrofa bone morphogenetic protein receptor, type IB (BMPR1B), mRNA	BMPR1B	NM_001203.2	658	BMPR1B	bone morphogenetic protein receptor, type IB	0.000278448	0.00287687	9.9514
4670	Leukocyte transendothelial migration	Sus scrofa mRNA, clone:UTR010035C06, expressed in uterus	CXCL12	NM_199168.2	6387	CXCL12	chemokine (C-X-C motif) ligand 12 (stromal cell-derived factor 1)	0.000484532	0.00379528	8.86972
4670	Leukocyte transendothelial migration	Sus scrofa vascular cell adhesion molecule (VCAM1), mRNA	VCAM1	AK291732.1	7412	VCAM1	vascular cell adhesion molecule 1	0.000484532	0.00379528	8.86972
4670	Leukocyte transendothelial migration	Sus scrofa gelatinase A (MMP-2), mRNA	MMP-2	NM_004530.4	4313	MMP2	matrix metallopeptidase 2 (gelatinase A, 72kDa gelatinase, 72kDa type IV collagenase)	0.000484532	0.00379528	8.86972
4670	Leukocyte transendothelial migration	Sus scrofa NADPH oxidase light chain subunit (GP22-PHOX), mRNA	GP22-PHOX	BC006465.1	1535	CYBA	cytochrome b-245, alpha polypeptide	0.000484532	0.00379528	8.86972
4670	Leukocyte transendothelial migration	Sus scrofa cadherin 5 (CDH5), mRNA	CDH5	AK300461.1	1003	CDH5	cadherin 5, type 2 (vascular endothelium)	0.000484532	0.00379528	8.86972
4110	Cell cycle	Sus scrofa mRNA, clone:THY010058B01, expressed in thymus	LOC100156398	BC031061.1	4173	MCM4	minichromosome maintenance complex component 4	0.000536835	0.00396177	8.68101
4110	Cell cycle	PREDICTED: Sus scrofa similar to minichromosome maintenance complex component 4 (LOC100156398), mRNA	LOC100156398	BC031061.1	4173	MCM4	minichromosome maintenance complex component 4	0.000536835	0.00396177	8.68101
4110	Cell cycle	PREDICTED: Sus scrofa tyrosine 3-monooxygenase/tryptophan 5-monooxygenase activation protein, zeta polypeptide (YWHAZ), mRNA	YWHAZ	NM_145690.2	7534	YWHAZ	tyrosine 3-monooxygenase/tryptophan 5-monooxygenase activation protein, zeta polypeptide	0.000536835	0.00396177	8.68101
4110	Cell cycle	PREDICTED: Sus scrofa similar to Histone acetyltransferase p300 (E1A-associated protein p300) (LOC100156226), mRNA	LOC100156226	BC172280.1	2033	EP300	E1A binding protein p300	0.000536835	0.00396177	8.68101
4110	Cell cycle	PREDICTED: Sus scrofa similar to cyclin-dependent kinase-2 alpha, transcript variant 1 (LOC100154715), mRNA	LOC100154715	NM_001798.3	1017	CDK2	cyclin-dependent kinase 2	0.000536835	0.00396177	8.68101
4110	Cell cycle	PREDICTED: Sus scrofa similar to cyclin-dependent kinase-2 alpha, transcript variant 2 (LOC100154715), mRNA	LOC100154715	NM_001798.3	1017	CDK2	cyclin-dependent kinase 2	0.000536835	0.00396177	8.68101
4110	Cell cycle	PREDICTED: Sus scrofa similar to E2F transcription factor 1 (LOC100153846), mRNA	LOC100153846	NM_005225.2	1869	E2F1	E2F transcription factor 1	0.000536835	0.00396177	8.68101
40	Pentose and glucuronate interconversions	Sus scrofa glucuronidase, beta (GUSB), mRNA	GUSB	NM_000181.3	2990	GUSB	glucuronidase, beta	0.00176668	0.0106425	40.8007
40	Pentose and glucuronate interconversions	Sus scrofa aldose reductase (ALR2), mRNA	ALR2	AK313439.1	231	AKR1B1	aldo-keto reductase family 1, member B1 (aldose reductase)	0.00176668	0.0106425	40.8007
4514	Cell adhesion molecules (CAMs)	Sus scrofa MHC class II DR-alpha (SLA-DRA), mRNA	SLA-DRA	AK313123.1	3122	HLA-DRA	major histocompatibility complex, class II, DR alpha	0.002098	0.0120423	6.47631
4514	Cell adhesion molecules (CAMs)	PREDICTED: Sus scrofa similar to Neogenin (LOC100156504), mRNA	LOC100156504	NM_002499.2	4756	NEO1	neogenin homolog 1 (chicken)	0.002098	0.0120423	6.47631
4514	Cell adhesion molecules (CAMs)	Sus scrofa vascular cell adhesion molecule (VCAM1), mRNA	VCAM1	AK291732.1	7412	VCAM1	vascular cell adhesion molecule 1	0.002098	0.0120423	6.47631
4514	Cell adhesion molecules (CAMs)	Sus scrofa CD34 molecule (CD34), mRNA	CD34	AK294381.1	947	CD34	CD34 molecule	0.002098	0.0120423	6.47631
4514	Cell adhesion molecules (CAMs)	Sus scrofa cadherin 5 (CDH5), mRNA	CDH5	AK300461.1	1003	CDH5	cadherin 5, type 2 (vascular endothelium)	0.002098	0.0120423	6.47631
5223	Non-small cell lung cancer	PREDICTED: Sus scrofa similar to E2F transcription factor 1 (LOC100153846), mRNA	LOC100153846	NM_005225.2	1869	E2F1	E2F transcription factor 1	0.0041121	0.0192302	11.6573
5219	Bladder cancer	PREDICTED: Sus scrofa similar to E2F transcription factor 1 (LOC100153846), mRNA	LOC100153846	NM_005225.2	1869	E2F1	E2F transcription factor 1	0.0041121	0.0192302	11.6573
5223	Non-small cell lung cancer	Sus scrofa retinoid X receptor, gamma (RXRG), mRNA	RXRG	BC012063.1	6258	RXRG	retinoid X receptor, gamma	0.0041121	0.0192302	11.6573
5219	Bladder cancer	Sus scrofa epidermal growth factor (EGF), mRNA	EGF	BC113461.1	1950	EGF	epidermal growth factor (beta-urogastrone)	0.0041121	0.0192302	11.6573
5223	Non-small cell lung cancer	Sus scrofa epidermal growth factor (EGF), mRNA	EGF	BC113461.1	1950	EGF	epidermal growth factor (beta-urogastrone)	0.0041121	0.0192302	11.6573
5219	Bladder cancer	Sus scrofa gelatinase A (MMP-2), mRNA	MMP-2	NM_004530.4	4313	MMP2	matrix metallopeptidase 2 (gelatinase A, 72kDa gelatinase, 72kDa type IV collagenase)	0.0041121	0.0192302	11.6573
4510	Focal adhesion	Sus scrofa caveolin 1 (CAV1), mRNA	CAV1	NM_001753.3	857	CAV1	caveolin 1, caveolae protein, 22kDa	0.005134	0.0219462	5.2988
4510	Focal adhesion	PREDICTED: Sus scrofa collagen type XI alpha 1 (COLL11A1), mRNA	COLL11A1	NM_001854.3	1301	COL11A1	collagen, type XI, alpha 1	0.005134	0.0219462	5.2988
4510	Focal adhesion	Sus scrofa epidermal growth factor (EGF), mRNA	EGF	BC113461.1	1950	EGF	epidermal growth factor (beta-urogastrone)	0.005134	0.0219462	5.2988
4510	Focal adhesion	Sus scrofa putative inhibitor of apoptosis (PIAP), mRNA	PIAP	NM_182962.1	330	BIRC3	baculoviral IAP repeat-containing 3	0.005134	0.0219462	5.2988
4510	Focal adhesion	BX668018 Sus Scrofa library (scac) Sus scrofa cDNA clone scac0026.p.19 5prim, mRNA sequence	COL5A1					0.005134	0.0219462	5.2988
532	Chondroitin sulfate biosynthesis	PREDICTED: Sus scrofa similar to dermatan 4 sulfotransferase 1 (LOC100157245), mRNA	LOC100157245	BC053633.1	113189	CHST14	carbohydrate (N-acetylgalactosamine 4-0) sulfotransferase 14	0.00603457	0.02398	23.3147
532	Chondroitin sulfate biosynthesis	PREDICTED: Sus scrofa similar to B cell RAG associated protein (LOC100152393), mRNA	LOC100152393	BC075813.1	51363	CHST15	carbohydrate (N-acetylgalactosamine 4-sulfate 6-O) sulfotransferase 15	0.00603457	0.02398	23.3147
4630	Jak-STAT signaling pathway	Sus scrofa mRNA, clone:AMP010011B05, expressed in alveolar macrophage	LOC100152238	NM_000416.2	3459	IFNGR1	interferon gamma receptor 1	0.0236701	0.0751522	4.53341
4630	Jak-STAT signaling pathway	Sus scrofa tyrosine kinase 2 (TYK2), mRNA	TYK2	NM_003331.4	7297	TYK2	tyrosine kinase 2	0.0236701	0.0751522	4.53341
4630	Jak-STAT signaling pathway	PREDICTED: Sus scrofa similar to Histone acetyltransferase p300 (E1A-associated protein p300) (LOC100156226), mRNA	LOC100156226	BC172280.1	2033	EP300	E1A binding protein p300	0.0236701	0.0751522	4.53341
4630	Jak-STAT signaling pathway	PREDICTED: Sus scrofa similar to sprouty-2-like protein (LOC100157266), mRNA	LOC100157266	NM_005842.2	10253	SPRY2	sprouty homolog 2 (Drosophila)	0.0236701	0.0751522	4.53341
4810	Regulation of actin cytoskeleton	Sus scrofa mRNA, clone:LNG010007F06, expressed in lung	ARPC1B	NM_005720.2	10095	ARPC1B	actin related protein 2/3 complex, subunit 1B, 41kDa	0.0271839	0.0829848	4.35208
4810	Regulation of actin cytoskeleton	PREDICTED: Sus scrofa similar to FYVE, RhoGEF and PH domain containing 1 (LOC100152387), mRNA	LOC100152387	NM_004463.2	2245	FGD1	FYVE, RhoGEF and PH domain containing 1	0.0271839	0.0829848	4.35208
4810	Regulation of actin cytoskeleton	Sus scrofa epidermal growth factor (EGF), mRNA	EGF	BC113461.1	1950	EGF	epidermal growth factor (beta-urogastrone)	0.0271839	0.0829848	4.35208
4810	Regulation of actin cytoskeleton	BW973127 full-length enriched swine cDNA library, adult periphral blood mononuclear cell Sus scrofa cDNA clone PBL010078G08 5', mRNA sequence	ARPC5					0.0271839	0.0829848	4.35208
4120	Ubiquitin mediated proteolysis	PREDICTED: Sus scrofa cullin 7 (CUL7), mRNA	CH242-196P11.12	D38548.1	9820	CUL7	cullin 7	0.0275383	0.0837414	5.97084
4120	Ubiquitin mediated proteolysis	PREDICTED: Sus scrofa similar to hect domain and RLD 2 (LOC100152665), mRNA	LOC100152665	NM_004667.4	8924	HERC2	hect domain and RLD 2	0.0275383	0.0837414	5.97084
4120	Ubiquitin mediated proteolysis	Sus scrofa putative inhibitor of apoptosis (PIAP), mRNA	PIAP	NM_182962.1	330	BIRC3	baculoviral IAP repeat-containing 3	0.0275383	0.0837414	5.97084
5216	Thyroid cancer	PREDICTED: Sus scrofa similar to transcription factor 7-like 2 (T-cell specific, HMG-box) (LOC100153922), mRNA	TCF7L2	NM_030756.4	6934	TCF7L2	transcription factor 7-like 2 (T-cell specific, HMG-box)	0.0360522	0.100308	9.60017
5216	Thyroid cancer	Sus scrofa retinoid X receptor, gamma (RXRG), mRNA	RXRG	BC012063.1	6258	RXRG	retinoid X receptor, gamma	0.0360522	0.100308	9.60017
230	Purine metabolism	Sus scrofa mRNA for c-myc transcription factor, complete cds	NME2	BC107894.1	654364	NME1-NME2	NME1-NME2 readthrough	0.0443229	0.113909	4.99601
230	Purine metabolism	PREDICTED: Sus scrofa similar to DNA-directed RNA polymerases I and III subunit RPAC2 (RNA polymerases I and III subunit AC2) (DNA-directed RNA polymerase I subunit D) (DNA-directed RNA polymerase I 16 kDa polypeptide) (RPA16) (RPC16) (hRPA19) (AC19) (LOC	LOC100153350	NM_015972.2	51082	POLR1D	polymerase (RNA) I polypeptide D, 16kDa	0.0443229	0.113909	4.99601
230	Purine metabolism	Sus scrofa adenylosuccinate lyase (ADSL), mRNA	ADSL	NM_000026.2	158	ADSL	adenylosuccinate lyase	0.0443229	0.113909	4.99601
4310	Wnt signaling pathway	Sus scrofa secreted frizzled-related protein 4 (SFRP4), mRNA	SFRP4	NM_003014.3	6424	SFRP4	secreted frizzled-related protein 4	0.0467353	0.117494	4.89609
4310	Wnt signaling pathway	PREDICTED: Sus scrofa similar to Histone acetyltransferase p300 (E1A-associated protein p300) (LOC100156226), mRNA	LOC100156226	BC172280.1	2033	EP300	E1A binding protein p300	0.0467353	0.117494	4.89609
4310	Wnt signaling pathway	PREDICTED: Sus scrofa similar to transcription factor 7-like 2 (T-cell specific, HMG-box) (LOC100153922), mRNA	TCF7L2	NM_030756.4	6934	TCF7L2	transcription factor 7-like 2 (T-cell specific, HMG-box)	0.0467353	0.117494	4.89609
620	Pyruvate metabolism	PREDICTED: Sus scrofa similar to Acylphosphatase-1 (Acylphosphate phosphohydrolase 1) (Acylphosphatase, organ-common type isozyme) (LOC100155997), mRNA	LOC100155997	NM_001107.3	97	ACYP1	acylphosphatase 1, erythrocyte (common) type	0.0491707	0.120958	8.16014
5213	Endometrial cancer	PREDICTED: Sus scrofa similar to transcription factor 7-like 2 (T-cell specific, HMG-box) (LOC100153922), mRNA	TCF7L2	NM_030756.4	6934	TCF7L2	transcription factor 7-like 2 (T-cell specific, HMG-box)	0.0491707	0.120958	8.16014
5213	Endometrial cancer	Sus scrofa epidermal growth factor (EGF), mRNA	EGF	BC113461.1	1950	EGF	epidermal growth factor (beta-urogastrone)	0.0491707	0.120958	8.16014
620	Pyruvate metabolism	Sus scrofa aldose reductase (ALR2), mRNA	ALR2	AK313439.1	231	AKR1B1	aldo-keto reductase family 1, member B1 (aldose reductase)	0.0491707	0.120958	8.16014
4060	Cytokine-cytokine receptor interaction	Sus scrofa mRNA, clone:AMP010011B05, expressed in alveolar macrophage	LOC100152238	NM_000416.2	3459	IFNGR1	interferon gamma receptor 1	0.069369	0.148957	3.26406
4060	Cytokine-cytokine receptor interaction	Sus scrofa mRNA, clone:UTR010035C06, expressed in uterus	CXCL12	NM_199168.2	6387	CXCL12	chemokine (C-X-C motif) ligand 12 (stromal cell-derived factor 1)	0.069369	0.148957	3.26406
4060	Cytokine-cytokine receptor interaction	PREDICTED: Sus scrofa similar to activin A type I receptor (LOC100152307), mRNA	LOC100152307	NM_001111067.2	90	ACVR1	activin A receptor, type I	0.069369	0.148957	3.26406
4060	Cytokine-cytokine receptor interaction	Sus scrofa epidermal growth factor (EGF), mRNA	EGF	BC113461.1	1950	EGF	epidermal growth factor (beta-urogastrone)	0.069369	0.148957	3.26406
5221	Acute myeloid leukemia	PREDICTED: Sus scrofa similar to Protein CBFA2T1 (Protein MTG8) (Protein ETO) (Eight twenty one protein) (Cyclin-D-related protein) (Zinc finger MYND domain-containing protein 2) (LOC100155449), mRNA	LOC100155449	NM_175634.1	862	RUNX1T1	runt-related transcription factor 1; translocated to, 1 (cyclin D-related)	0.0746012	0.155086	6.52812
5221	Acute myeloid leukemia	PREDICTED: Sus scrofa similar to transcription factor 7-like 2 (T-cell specific, HMG-box) (LOC100153922), mRNA	TCF7L2	NM_030756.4	6934	TCF7L2	transcription factor 7-like 2 (T-cell specific, HMG-box)	0.0746012	0.155086	6.52812
240	Pyrimidine metabolism	Sus scrofa mRNA for c-myc transcription factor, complete cds	NME2	BC107894.1	654364	NME1-NME2	NME1-NME2 readthrough	0.0801776	0.161203	6.27703
240	Pyrimidine metabolism	PREDICTED: Sus scrofa similar to DNA-directed RNA polymerases I and III subunit RPAC2 (RNA polymerases I and III subunit AC2) (DNA-directed RNA polymerase I subunit D) (DNA-directed RNA polymerase I 16 kDa polypeptide) (RPA16) (RPC16) (hRPA19) (AC19) (LOC	LOC100153350	NM_015972.2	51082	POLR1D	polymerase (RNA) I polypeptide D, 16kDa	0.0801776	0.161203	6.27703
5214	Glioma	PREDICTED: Sus scrofa similar to E2F transcription factor 1 (LOC100153846), mRNA	LOC100153846	NM_005225.2	1869	E2F1	E2F transcription factor 1	0.0859065	0.167081	6.04455
5214	Glioma	Sus scrofa epidermal growth factor (EGF), mRNA	EGF	BC113461.1	1950	EGF	epidermal growth factor (beta-urogastrone)	0.0859065	0.167081	6.04455
4520	Adherens junction	PREDICTED: Sus scrofa similar to Histone acetyltransferase p300 (E1A-associated protein p300) (LOC100156226), mRNA	LOC100156226	BC172280.1	2033	EP300	E1A binding protein p300	0.0978034	0.178141	5.62769
4520	Adherens junction	PREDICTED: Sus scrofa similar to transcription factor 7-like 2 (T-cell specific, HMG-box) (LOC100153922), mRNA	TCF7L2	NM_030756.4	6934	TCF7L2	transcription factor 7-like 2 (T-cell specific, HMG-box)	0.0978034	0.178141	5.62769
4512	ECM-receptor interaction	PREDICTED: Sus scrofa collagen type XI alpha 1 (COLL11A1), mRNA	COLL11A1	NM_001854.3	1301	COL11A1	collagen, type XI, alpha 1	0.103963	0.183333	5.4401
5218	Melanoma	PREDICTED: Sus scrofa similar to E2F transcription factor 1 (LOC100153846), mRNA	LOC100153846	NM_005225.2	1869	E2F1	E2F transcription factor 1	0.103963	0.183333	5.4401
5218	Melanoma	Sus scrofa epidermal growth factor (EGF), mRNA	EGF	BC113461.1	1950	EGF	epidermal growth factor (beta-urogastrone)	0.103963	0.183333	5.4401
4512	ECM-receptor interaction	BX668018 Sus Scrofa library (scac) Sus scrofa cDNA clone scac0026.p.19 5prim, mRNA sequence	COL5A1					0.103963	0.183333	5.4401
632	Benzoate degradation via CoA ligation	PREDICTED: Sus scrofa similar to Acylphosphatase-1 (Acylphosphate phosphohydrolase 1) (Acylphosphatase, organ-common type isozyme) (LOC100155997), mRNA	LOC100155997	NM_001107.3	97	ACYP1	acylphosphatase 1, erythrocyte (common) type	0.11959	0.195133	16.3203
3030	DNA replication	Sus scrofa mRNA, clone:THY010058B01, expressed in thymus	LOC100156398	BC031061.1	4173	MCM4	minichromosome maintenance complex component 4	0.142639	0.209639	13.6002
120	Primary bile acid biosynthesis	Sus scrofa cytochrome P450, family 39, subfamily A, polypeptide 1 (CYP39A1), mRNA	CYP39A1	AF237982.1	51302	CYP39A1	cytochrome P450, family 39, subfamily A, polypeptide 1	0.142639	0.209639	13.6002
3420	Nucleotide excision repair	PREDICTED: Sus scrofa similar to RAD23 homolog B (S. cerevisiae) (LOC100153668), mRNA	LOC100153668	AK125226.1	5887	RAD23B	RAD23 homolog B (S. cerevisiae)	0.142639	0.209639	13.6002
3030	DNA replication	PREDICTED: Sus scrofa similar to minichromosome maintenance complex component 4 (LOC100156398), mRNA	LOC100156398	BC031061.1	4173	MCM4	minichromosome maintenance complex component 4	0.142639	0.209639	13.6002
4940	Type I diabetes mellitus	Sus scrofa carboxypeptidase E (CPE), mRNA	CPE	BC033866.1	1363	CPE	carboxypeptidase E	0.143604	0.210183	4.53341
4940	Type I diabetes mellitus	Sus scrofa MHC class II DR-alpha (SLA-DRA), mRNA	SLA-DRA	AK313123.1	3122	HLA-DRA	major histocompatibility complex, class II, DR alpha	0.143604	0.210183	4.53341
1100	Metabolic pathways	Sus scrofa N-acetylglucosaminyltransferase I (LOC780412), mRNA	LOC780412	NM_001114620.1	4245	MGAT1	mannosyl (alpha-1,3-)-glycoprotein beta-1,2-N-acetylglucosaminyltransferase	0.144828	0.210868	1.76118
1100	Metabolic pathways	Sus scrofa mRNA for c-myc transcription factor, complete cds	NME2	BC107894.1	654364	NME1-NME2	NME1-NME2 readthrough	0.144828	0.210868	1.76118
1100	Metabolic pathways	Sus scrofa glucuronidase, beta (GUSB), mRNA	GUSB	NM_000181.3	2990	GUSB	glucuronidase, beta	0.144828	0.210868	1.76118
1100	Metabolic pathways	PREDICTED: Sus scrofa prostaglandin-endoperoxide synthase 1 (PTGS1), mRNA	PTGS1	NM_000962.2	5742	PTGS1	prostaglandin-endoperoxide synthase 1 (prostaglandin G/H synthase and cyclooxygenase)	0.144828	0.210868	1.76118
1100	Metabolic pathways	PREDICTED: Sus scrofa similar to vacuolar H(+)-ATPase subunit; V-ATPase subunit; M16 (LOC100154379), mRNA	LOC100154379	NM_004888.3	9550	ATP6V1G1	ATPase, H+ transporting, lysosomal 13kDa, V1 subunit G1	0.144828	0.210868	1.76118
1100	Metabolic pathways	PREDICTED: Sus scrofa similar to DNA-directed RNA polymerases I and III subunit RPAC2 (RNA polymerases I and III subunit AC2) (DNA-directed RNA polymerase I subunit D) (DNA-directed RNA polymerase I 16 kDa polypeptide) (RPA16) (RPC16) (hRPA19) (AC19) (LOC	LOC100153350	NM_015972.2	51082	POLR1D	polymerase (RNA) I polypeptide D, 16kDa	0.144828	0.210868	1.76118
1100	Metabolic pathways	PREDICTED: Sus scrofa similar to N-deacetylase/N-sulfotransferase (heparan glucosaminyl) 2 (LOC100151795), mRNA	LOC100151795	NM_003635.3	8509	NDST2	N-deacetylase/N-sulfotransferase (heparan glucosaminyl) 2	0.144828	0.210868	1.76118
1100	Metabolic pathways	Sus scrofa adenylosuccinate lyase (ADSL), mRNA	ADSL	NM_000026.2	158	ADSL	adenylosuccinate lyase	0.144828	0.210868	1.76118
1100	Metabolic pathways	Sus scrofa aldose reductase (ALR2), mRNA	ALR2	AK313439.1	231	AKR1B1	aldo-keto reductase family 1, member B1 (aldose reductase)	0.144828	0.210868	1.76118
5010	Alzheimer's disease	S.scrofa mRNA for ryanodine receptor type 3	RYR3	NM_001036.3	6263	RYR3	ryanodine receptor 3	0.154955	0.216268	3.02228
5010	Alzheimer's disease	Sus scrofa apolipoprotein E (APOE), mRNA	APOE	AK314898.1	348	APOE	apolipoprotein E	0.154955	0.216268	3.02228
5010	Alzheimer's disease	Sus scrofa amyloid beta (A4) precursor protein (APP), mRNA	APP	NM_000484.3	351	APP	amyloid beta (A4) precursor protein	0.154955	0.216268	3.02228
4916	Melanogenesis	PREDICTED: Sus scrofa similar to Histone acetyltransferase p300 (E1A-associated protein p300) (LOC100156226), mRNA	LOC100156226	BC172280.1	2033	EP300	E1A binding protein p300	0.157745	0.217678	4.29481
4916	Melanogenesis	PREDICTED: Sus scrofa similar to transcription factor 7-like 2 (T-cell specific, HMG-box) (LOC100153922), mRNA	TCF7L2	NM_030756.4	6934	TCF7L2	transcription factor 7-like 2 (T-cell specific, HMG-box)	0.157745	0.217678	4.29481
5212	Pancreatic cancer	PREDICTED: Sus scrofa similar to E2F transcription factor 1 (LOC100153846), mRNA	LOC100153846	NM_005225.2	1869	E2F1	E2F transcription factor 1	0.157745	0.217678	4.29481
5212	Pancreatic cancer	Sus scrofa epidermal growth factor (EGF), mRNA	EGF	BC113461.1	1950	EGF	epidermal growth factor (beta-urogastrone)	0.157745	0.217678	4.29481
531	Glycosaminoglycan degradation	Sus scrofa glucuronidase, beta (GUSB), mRNA	GUSB	NM_000181.3	2990	GUSB	glucuronidase, beta	0.165407	0.221392	11.6573
4530	Tight junction	PREDICTED: Sus scrofa similar to Ras-related protein Rab-13 (Cell growth-inhibiting gene 4 protein) (LOC100154707), mRNA	LOC100154707	AK291580.1	5872	RAB13	RAB13, member RAS oncogene family	0.18724	0.230847	3.88578
4530	Tight junction	PREDICTED: Sus scrofa similar to membrane associated guanylate kinase, WW and PDZ domain containing 3 (LOC100153223), mRNA	LOC100153223	NM_001142782.1	260425	MAGI3	membrane associated guanylate kinase, WW and PDZ domain containing 3	0.18724	0.230847	3.88578
3020	RNA polymerase	PREDICTED: Sus scrofa similar to DNA-directed RNA polymerases I and III subunit RPAC2 (RNA polymerases I and III subunit AC2) (DNA-directed RNA polymerase I subunit D) (DNA-directed RNA polymerase I 16 kDa polypeptide) (RPA16) (RPC16) (hRPA19) (AC19) (LOC	LOC100153350	NM_015972.2	51082	POLR1D	polymerase (RNA) I polypeptide D, 16kDa	0.187896	0.231108	10.2002
534	Heparan sulfate biosynthesis	PREDICTED: Sus scrofa similar to N-deacetylase/N-sulfotransferase (heparan glucosaminyl) 2 (LOC100151795), mRNA	LOC100151795	NM_003635.3	8509	NDST2	N-deacetylase/N-sulfotransferase (heparan glucosaminyl) 2	0.187896	0.231108	10.2002
52	Galactose metabolism	Sus scrofa aldose reductase (ALR2), mRNA	ALR2	AK313439.1	231	AKR1B1	aldo-keto reductase family 1, member B1 (aldose reductase)	0.187896	0.231108	10.2002
4010	MAPK signaling pathway	Sus scrofa myocyte enhancer factor 2C protein (MEF2C) mRNA, complete cds	MEF2C	NM_001131005.1	4208	MEF2C	myocyte enhancer factor 2C	0.207366	0.240157	2.66092
4010	MAPK signaling pathway	Sus scrofa epidermal growth factor (EGF), mRNA	EGF	BC113461.1	1950	EGF	epidermal growth factor (beta-urogastrone)	0.207366	0.240157	2.66092
4010	MAPK signaling pathway	Sus scrofa stathmin-1 (LOC494463), mRNA	LOC494463	BC082228.1	3925	STMN1	stathmin 1	0.207366	0.240157	2.66092
3440	Homologous recombination	Sus scrofa Bloom syndrome (BLM), mRNA	BLM	NM_000057.2	641	BLM	Bloom syndrome, RecQ helicase-like	0.210111	0.241348	9.06683
4912	GnRH signaling pathway	Sus scrofa gelatinase A (MMP-2), mRNA	MMP-2	NM_004530.4	4313	MMP2	matrix metallopeptidase 2 (gelatinase A, 72kDa gelatinase, 72kDa type IV collagenase)	0.210314	0.241436	3.62673
4912	GnRH signaling pathway	Sus scrofa matrix metallopeptidase 14 (membrane-inserted) (MMP14), mRNA	MMP14	NM_004995.2	4323	MMP14	matrix metallopeptidase 14 (membrane-inserted)	0.210314	0.241436	3.62673
860	Porphyrin and chlorophyll metabolism	Sus scrofa glucuronidase, beta (GUSB), mRNA	GUSB	NM_000181.3	2990	GUSB	glucuronidase, beta	0.232054	0.253569	8.16014
4612	Antigen processing and presentation	Sus scrofa MHC class II DR-alpha (SLA-DRA), mRNA	SLA-DRA	AK313123.1	3122	HLA-DRA	major histocompatibility complex, class II, DR alpha	0.242181	0.258831	3.33067
4612	Antigen processing and presentation	Sus scrofa proteasome (prosome, macropain) activator subunit 2 (PA28 beta) (PSME2), mRNA	PSME2	BC072025.1	5721	PSME2	proteasome (prosome, macropain) activator subunit 2 (PA28 beta)	0.242181	0.258831	3.33067
2010	ABC transporters	Sus scrofa ATP-binding cassette, sub-family G (WHITE), member 2 (ABCG2), mRNA	ABCG2	AK290000.1	9429	ABCG2	ATP-binding cassette, sub-family G (WHITE), member 2	0.253729	0.264557	7.41831
4722	Neurotrophin signaling pathway	PREDICTED: Sus scrofa tyrosine 3-monooxygenase/tryptophan 5-monooxygenase activation protein, zeta polypeptide (YWHAZ), mRNA	YWHAZ	NM_145690.2	7534	YWHAZ	tyrosine 3-monooxygenase/tryptophan 5-monooxygenase activation protein, zeta polypeptide	0.275134	0.274462	3.0793
4722	Neurotrophin signaling pathway	Sus scrofa melanoma antigen family D, 1 (MAGED1), mRNA	MAGED1	AF300328.1	9500	MAGED1	melanoma antigen family D, 1	0.275134	0.274462	3.0793
500	Starch and sucrose metabolism	Sus scrofa glucuronidase, beta (GUSB), mRNA	GUSB	NM_000181.3	2990	GUSB	glucuronidase, beta	0.27514	0.274465	6.80012
5217	Basal cell carcinoma	PREDICTED: Sus scrofa similar to transcription factor 7-like 2 (T-cell specific, HMG-box) (LOC100153922), mRNA	TCF7L2	NM_030756.4	6934	TCF7L2	transcription factor 7-like 2 (T-cell specific, HMG-box)	0.27514	0.274465	6.80012
983	Drug metabolism - other enzymes	Sus scrofa glucuronidase, beta (GUSB), mRNA	GUSB	NM_000181.3	2990	GUSB	glucuronidase, beta	0.296289	0.283444	6.27703
4330	Notch signaling pathway	PREDICTED: Sus scrofa similar to Histone acetyltransferase p300 (E1A-associated protein p300) (LOC100156226), mRNA	LOC100156226	BC172280.1	2033	EP300	E1A binding protein p300	0.296289	0.283444	6.27703
51	Fructose and mannose metabolism	Sus scrofa aldose reductase (ALR2), mRNA	ALR2	AK313439.1	231	AKR1B1	aldo-keto reductase family 1, member B1 (aldose reductase)	0.296289	0.283444	6.27703
250	Alanine, aspartate and glutamate metabolism	Sus scrofa adenylosuccinate lyase (ADSL), mRNA	ADSL	NM_000026.2	158	ADSL	adenylosuccinate lyase	0.317179	0.294031	5.82867
910	Nitrogen metabolism	Sus scrofa carbonic anhydrase III, muscle specific (CA3), mRNA	CA3	NM_005181.3	761	CA3	carbonic anhydrase III, muscle specific	0.317179	0.294031	5.82867
4150	mTOR signaling pathway	Sus scrofa mRNA, clone:OVR010011G07, expressed in ovary	EIF4E2	AB209519.1	9470	EIF4E2	eukaryotic translation initiation factor 4E family member 2	0.337814	0.307282	5.4401
4150	mTOR signaling pathway	Sus scrofa eukaryotic translation initiation factor 4E family member 2 (EIF4E2), mRNA	EIF4E2	BC021690.1	9470	EIF4E2	eukaryotic translation initiation factor 4E family member 2	0.337814	0.307282	5.4401
520	Amino sugar and nucleotide sugar metabolism	PREDICTED: Sus scrofa similar to Phosphoglucomutase 3 (LOC100156015), mRNA	LOC100156015	AK301867.1	5238	PGM3	phosphoglucomutase 3	0.358197	0.319892	5.10009
510	N-Glycan biosynthesis	Sus scrofa N-acetylglucosaminyltransferase I (LOC780412), mRNA	LOC780412	NM_001114620.1	4245	MGAT1	mannosyl (alpha-1,3-)-glycoprotein beta-1,2-N-acetylglucosaminyltransferase	0.39822	0.343361	4.53341
561	Glycerolipid metabolism	Sus scrofa aldose reductase (ALR2), mRNA	ALR2	AK313439.1	231	AKR1B1	aldo-keto reductase family 1, member B1 (aldose reductase)	0.417865	0.354299	4.29481
5016	Huntington's disease	PREDICTED: Sus scrofa similar to Histone acetyltransferase p300 (E1A-associated protein p300) (LOC100156226), mRNA	LOC100156226	BC172280.1	2033	EP300	E1A binding protein p300	0.423429	0.357331	2.33147
5016	Huntington's disease	Sus scrofa solute carrier family 25 (mitochondrial carrier; adenine nucleotide translocator), member 6 (SLC25A6), nuclear gene encoding mitochondrial protein, mRNA	SLC25A6	NM_001636.3	293	SLC25A6	solute carrier family 25 (mitochondrial carrier; adenine nucleotide translocator), member 6	0.423429	0.357331	2.33147
4020	Calcium signaling pathway	S.scrofa mRNA for ryanodine receptor type 3	RYR3	NM_001036.3	6263	RYR3	ryanodine receptor 3	0.45045	0.371659	2.23566
4020	Calcium signaling pathway	Sus scrofa solute carrier family 25 (mitochondrial carrier; adenine nucleotide translocator), member 6 (SLC25A6), nuclear gene encoding mitochondrial protein, mRNA	SLC25A6	NM_001636.3	293	SLC25A6	solute carrier family 25 (mitochondrial carrier; adenine nucleotide translocator), member 6	0.45045	0.371659	2.23566
5310	Asthma	Sus scrofa MHC class II DR-alpha (SLA-DRA), mRNA	SLA-DRA	AK313123.1	3122	HLA-DRA	major histocompatibility complex, class II, DR alpha	0.456437	0.374747	3.88578
3050	Proteasome	Sus scrofa proteasome (prosome, macropain) activator subunit 2 (PA28 beta) (PSME2), mRNA	PSME2	BC072025.1	5721	PSME2	proteasome (prosome, macropain) activator subunit 2 (PA28 beta)	0.494073	0.393489	3.54789
4720	Long-term potentiation	PREDICTED: Sus scrofa similar to Histone acetyltransferase p300 (E1A-associated protein p300) (LOC100156226), mRNA	LOC100156226	BC172280.1	2033	EP300	E1A binding protein p300	0.512546	0.402283	3.40006
[truncated: 31 more rows]

[truncated: 32 more sheets: LR7 vs LR6-up regulation, LR7 vs LR6-down regulation, LR8 vs LR7-up regulation, LR8 vs LR7-down regulation, LR9 vs LR8-up regulation, LR9 vs LR8-down regulation, LR10 vs LR9-up regulation, LR10 vs LR9-down regulation, LT2 vs LT1-up regulation, LT2 vs LT1-down regulation, LT3 vs LT2-up regulation, LT3 vs LT2-down regulation, LT4 vs LT3-up regulation, LT4 vs LT3-down regulation, LT5 vs LT4-up regulation, LT5 vs LT4-down regulation, LT6 vs LT5-up regulation, LT6 vs LT5-down regulation, LT7 vs LT6-up regulation, LT7 vs LT6-down regulation …]
